# Supplementary material for: A Pd-catalyzed highly selective three-component protocol for trisubstituted allenes
Source: Royal Society of Chemistry journal article supplement (doi:10.1039/d3sc01849k), 2023-01-01
Supplement: d3sc01849k1.pdf [file d3sc01849k1.pdf]

## Pd-Catalyzed Highly Selective Three-Component Protocol for Trisubstituted Allenenes

Can Li,<sup>a,b</sup> Zhengnan Zhou,<sup>a,b</sup> and Shengming Ma\*<sup>a,c</sup>

<sup>a</sup> State Key Laboratory of Organometallic Chemistry, Shanghai Institute of Organic Chemistry, Chinese Academy of Sciences, 345 Lingling Lu, Shanghai 200032, P. R. China

<sup>b</sup> University of Chinese Academy of Sciences, Beijing 100049, P. R. China

<sup>c</sup> Research Center for Molecular Recognition and Synthesis, Department of Chemistry, Fudan University, 220 Handan Lu, Shanghai 200433, P. R. China

Email: [masm@sioc.ac.cn](mailto:masm@sioc.ac.cn),

|                                                                                      |          |
|--------------------------------------------------------------------------------------|----------|
| General information                                                                  | S2       |
| Supplementary Scheme                                                                 | S3       |
| Experimental details and analytical data                                             | S4-S55   |
| References                                                                           | S57      |
| <sup>1</sup> H NMR, <sup>13</sup> C NMR, <sup>19</sup> F NMR spectra of the products | S58-S208 |

## General Information

NMR spectra were taken with Agilent, Varian Mercury, or Bruker 400 MHz NMR spectrometer (400 MHz for  $^1\text{H}$  NMR; 100 MHz for  $^{13}\text{C}$  NMR; 376 MHz for  $^{19}\text{F}$  NMR). All  $^1\text{H}$  NMR experiments were measured with tetramethylsilane (0 ppm) in  $\text{CDCl}_3$  as the internal reference;  $^{13}\text{C}$  NMR experiments were measured in relative to the signal of  $\text{CDCl}_3$  (77.0 ppm);  $^{19}\text{F}$  NMR experiments were measured in relative to the signal of  $\text{CFCl}_3$  (0 ppm) in  $\text{CDCl}_3$ .  $[\text{Pd}(\text{allyl})\text{Cl}]_2$  was purchased from Bidepharm and J&K. SPhos was purchased from Bidepharm and Strem Chemicals. Petroleum ether (b.p. 60~90 °C), ethyl acetate, and dichloromethane were purchased from Shanghai Titan Scientific Co. Ltd. THF and toluene were dried over sodium wire with benzophenone as the indicator and distilled freshly before use. Other reagents were all commercially available and used as received without further purification. All the temperatures are referred to the oil baths used.

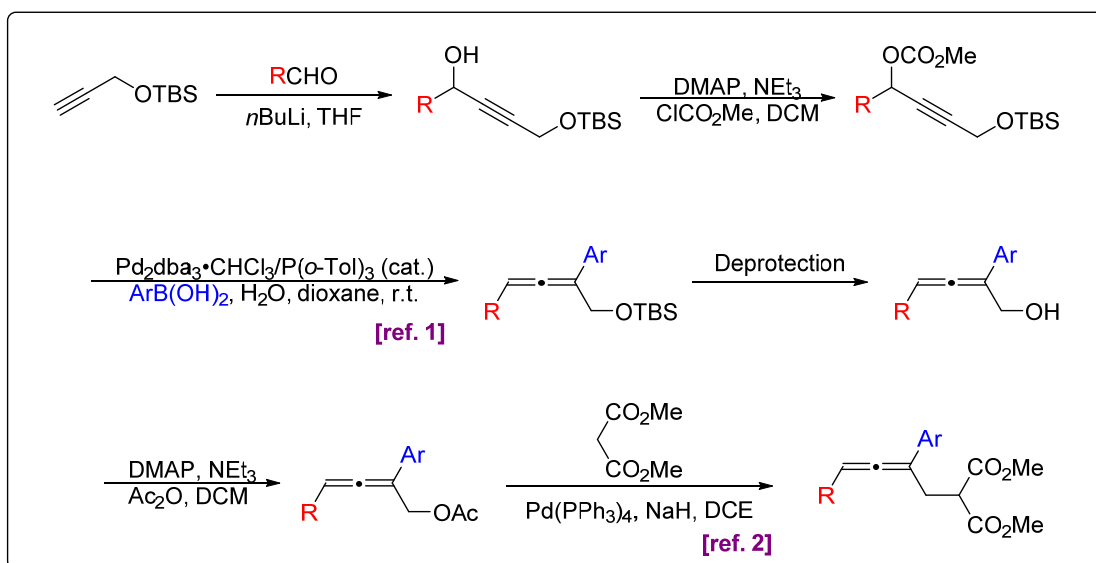

**Scheme S1. The traditional protocol for the synthesis of the trisubstituted allenyl malonates.**<sup>1-2</sup>

## Experimental details and analytical data

### 1. Synthesis of 2-alkynyl-1,4-diol dicarbonate

Compound **1b** was synthesized according to the reported procedure.<sup>3</sup>

(1) Dimethyl 1-(2-naphthyl)but-2-yn-1,4-diyl dicarbonate **1a**<sup>3</sup> (lican-05-077)

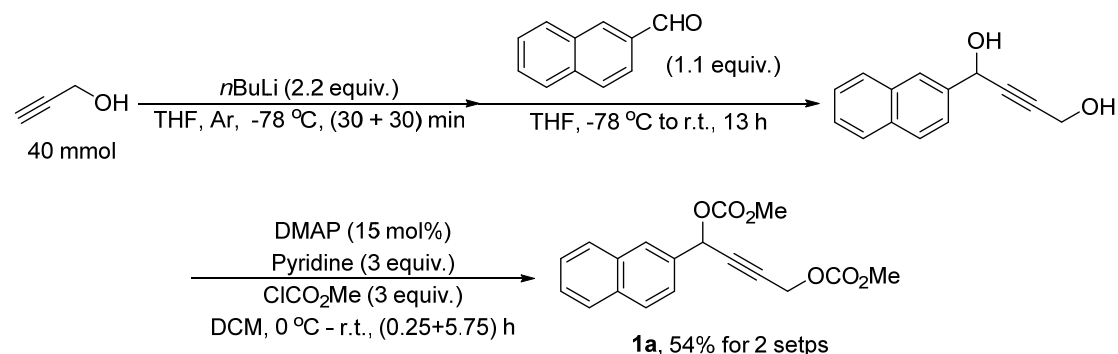

**Typical Procedure I:** To a solution of propargyl alcohol (2.32 mL,  $d = 0.963\text{ g/mL}$ , 2.2342 g, 40 mmol) in THF (60 mL) was added dropwise  $n\text{BuLi}$  (2.5 M in hexane, 35.2 mL, 88 mmol) at  $-78\text{ }^{\circ}\text{C}$  within 30 minutes. After lithiation for 30 minutes at  $-78\text{ }^{\circ}\text{C}$ , a solution of 2-naphthaldehyde (6.8714 g, 44 mmol) in THF (40 mL) was added dropwise at  $-78\text{ }^{\circ}\text{C}$  within 10 minutes. The resulting mixture was stirred for 13 h while gradually warming up to room temperature, quenched with  $\text{NH}_4\text{Cl}$  (aq., 50 mL), and extracted with ethyl acetate (50 mL  $\times$  3). The combined organic extract layer was washed with brine (50 mL  $\times$  3) and dried over anhydrous  $\text{Na}_2\text{SO}_4$ . After filtration and evaporation, the residue was used in the next step without further purification.

**Typical Procedure II:** To a three-neck flask were added the above residue,  $\text{CH}_2\text{Cl}_2$  (100 mL), DMAP (0.7371 g, 6 mmol), and pyridine (9.7 mL,  $d = 0.983\text{ g/mL}$ , 9.5351 g, 121 mmol) sequentially. The resulting mixture was stirred at  $0\text{ }^{\circ}\text{C}$  and then methyl chloroformate (9.3 mL,  $d = 1.22\text{ g/mL}$ , 11.3460 g, 120 mmol) was added dropwise within 15 min at  $0\text{ }^{\circ}\text{C}$ . After the addition, the resulting mixture was stirred for 5.75 h while gradually warming up to room temperature. After the reaction was complete as monitored by TLC, it was quenched with a saturated solution of  $\text{NH}_4\text{Cl}$  (aq., 50 mL). The aqueous phase was extracted with  $\text{CH}_2\text{Cl}_2$  (50 mL  $\times$  3). The

combined organic layer was washed with brine (50 mL × 3) and dried over anhydrous Na<sub>2</sub>SO<sub>4</sub>. After filtration and evaporation of the solvent, chromatography on silica gel (eluent: petroleum ether / CH<sub>2</sub>Cl<sub>2</sub> = 1/1 (2400 mL)) afforded **1a** (7.0411 g, 54% for 2 steps) as a yellowish solid: **m.p.** 68.0-69.2 °C (hexane / ethyl acetate); **<sup>1</sup>H NMR** (400 MHz, CDCl<sub>3</sub>): δ 7.98 (s, 1 H, ArH), 7.91-7.78 (m, 3 H, ArH), 7.61 (d, *J* = 8.0 Hz, 1 H, ArH), 7.55-7.45 (m, 2 H, ArH), 6.50 (s, 1 H, CH), 4.84 (s, 2 H, CH<sub>2</sub>), 3.79 (s, 6 H, 2 × OCH<sub>3</sub>); **<sup>13</sup>C NMR** (100 MHz, CDCl<sub>3</sub>): δ 155.1, 154.7, 133.5, 133.0, 132.9, 128.7, 128.3, 127.7, 127.2, 126.8, 126.5, 124.8, 83.3, 81.8, 69.5, 55.4, 55.2, 55.1; **IR** (neat): ν 2963, 2858, 1744, 1442, 1376, 1327, 1245, 1140, 935 cm<sup>-1</sup>; **Raman**: ν 3057, 2963, 2939, 2289, 2223, 1750, 1634, 1577, 1470, 1389, 1328, 1176, 1105, 1020 cm<sup>-1</sup>; **MS** (70 eV, EI) *m/z* (%): 328 (M<sup>+</sup>, 7.48), 165 (100); **Elem. Anal.** Calcd. for C<sub>18</sub>H<sub>16</sub>O<sub>6</sub>: C, 65.85; H, 4.91, found C, 65.64; H, 4.91.

(2) Dimethyl 1-(4-chlorophenyl)but-2-yn-1,4-diyl dicarbonate **1c**<sup>3</sup> (zzn-1-047)

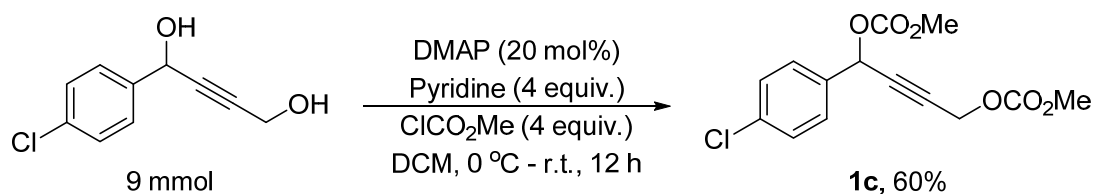

Following the **Typical Procedure II**, the reaction of 1-(4-chlorophenyl)but-2-yn-1,4-diol (1.7640 g, 9 mmol), CH<sub>2</sub>Cl<sub>2</sub> (40 mL), DMAP (220.4 mg, 1.8 mmol), pyridine (2.9 mL, d = 0.983 g/mL, 2.85 g, 36 mmol) and methyl chloroformate (2.8 mL, d = 1.22 g/mL, 3.4160 g, 36 mmol) afforded **1c** (1.6868 g, 60%) (eluent: petroleum ether / ethyl acetate = 6/1 (1400 mL)) as a yellow oil; **<sup>1</sup>H NMR** (400 MHz, CDCl<sub>3</sub>): δ 7.47-7.44 (m, 2 H, ArH), 7.36-7.34 (m, 2 H, ArH), 6.30 (s, 1 H, CH), 4.82 (d, *J* = 1.6 Hz, 2 H, CH<sub>2</sub>), 3.81 (m, 6 H, 2 × OCH<sub>3</sub>); **<sup>13</sup>C NMR** (100 MHz, CDCl<sub>3</sub>): δ 155.0, 154.5, 135.2, 134.2, 129.1, 128.9, 82.7, 81.8, 68.5, 55.2, 55.1; **IR** (neat): ν 3007, 2959, 2855, 1746, 1597, 1493, 1442, 1374, 1242 cm<sup>-1</sup>; **MS** (ESI) *m/z* 335.0 [M(<sup>35</sup>Cl)+Na]<sup>+</sup>; **HRMS** (ESI) Calcd for C<sub>14</sub>H<sub>13</sub>O<sub>6</sub><sup>35</sup>ClNa [M(<sup>35</sup>Cl)+Na]<sup>+</sup>: 335.0293, Found: 335.0291.

(3) Dimethyl 1-(4-cyanophenyl)but-2-yn-1,4-diyl dicarbonate **1d**<sup>3</sup> (lican-05-070)

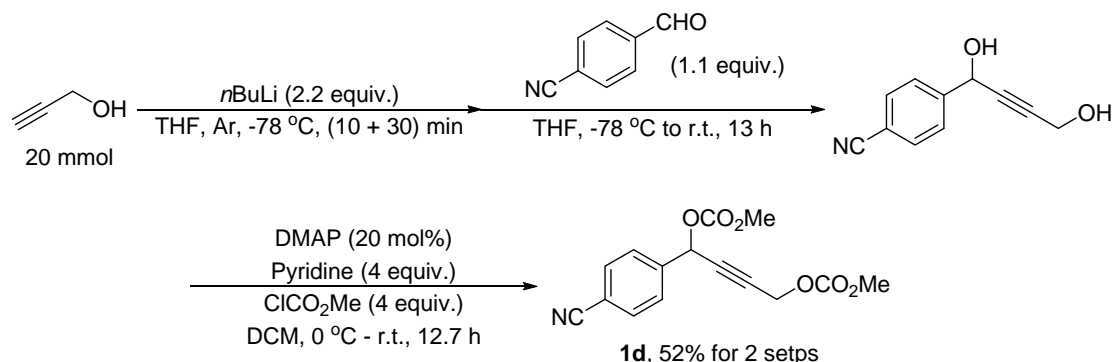

Following the **Typical Procedure I**, the reaction of propargyl alcohol (1.16 mL,  $d = 0.963$  g/mL, 1.1171 g, 20 mmol),  $n\text{BuLi}$  (2.5 M in hexane, 17.6 mL, 44 mmol), 4-cyanobenzaldehyde (2.8872 g, 22 mmol) in THF (60 mL) afforded the crude product, and which was used in the next step without further purification.

Following the **Typical Procedure II**, the reaction of the crude product,  $\text{CH}_2\text{Cl}_2$  (60 mL), DMAP (0.4841 g, 4 mmol), pyridine (6.4 mL,  $d = 0.983$  g/mL, 6.2912 g, 80 mmol) and methyl chloroformate (6.2 mL,  $d = 1.22$  g/mL, 7.5640 g, 80 mmol) afforded **1d** (3.1588 g, 52% for 2 steps) (eluent: petroleum ether / ethyl acetate = 5/1 (1800 mL)) as a white solid: **m.p.** 85.7-87.3 °C (hexane / ethyl acetate): **<sup>1</sup>H NMR** (400 MHz,  $\text{CDCl}_3$ ):  $\delta$  7.70 (d,  $J = 8.4$  Hz, 2 H, ArH), 7.64 (d,  $J = 8.0$  Hz, 2 H, ArH), 6.36 (s, 1 H, CH), 4.82 (s, 2 H,  $\text{CH}_2$ ), 3.83 (s, 3 H,  $\text{OCH}_3$ ), 3.82 (s, 3 H,  $\text{OCH}_3$ ); **<sup>13</sup>C NMR** (100 MHz,  $\text{CDCl}_3$ ):  $\delta$  154.8, 154.3, 140.4, 132.4, 128.0, 118.0, 113.0, 82.5, 81.9, 68.0, 55.2, 55.1, 55.0; **IR** (neat):  $\nu$  2965, 2229, 1742, 1610, 1507, 1441, 1245, 1140, 946  $\text{cm}^{-1}$ ; **MS** (70 eV, EI)  $m/z$  (%): 303 ( $\text{M}^+$ , 1.12), 140 (100); **Elem. Anal.** Calcd. for  $\text{C}_{15}\text{H}_{13}\text{NO}_6$ : C, 59.41; H, 4.32, found C, 59.54; H, 4.33.

(4) Dimethyl 1-(4-trifluoromethyl)but-2-yn-1,4-diyl dicarbonate **1e**<sup>3</sup> (zzn-1-057)

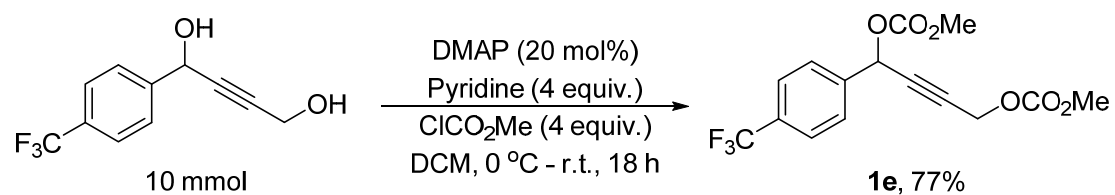

Following the **Typical Procedure II**, the reaction of 1-(4-trifluoromethyl)but-2-yn-1,4-diol (2.3012 g, 10 mmol),  $\text{CH}_2\text{Cl}_2$  (40 mL), DMAP

(244.9 mg, 2 mmol), pyridine (3.2 mL, d = 0.983 g/mL, 3.1456 g, 40 mmol) and methyl chloroformate (3.1 mL, d = 1.22 g/mL, 3.78 g, 40 mmol) afforded **1e** (2.6750 g, 77%) (eluent: petroleum ether / ethyl acetate = 8/1 (900 mL) to petroleum ether / ethyl acetate = 5/1 (480 mL)) as a yellow oil; **<sup>1</sup>H NMR** (400 MHz, CDCl<sub>3</sub>): δ 7.66 (s, 4 H, ArH), 6.39 (s, 1 H, CH), 4.83 (s, 2 H, CH<sub>2</sub>), 3.82 (s, 3 H, OCH<sub>3</sub>), 3.81 (s, 3 H, OCH<sub>3</sub>); **<sup>13</sup>C NMR** (100 MHz, CDCl<sub>3</sub>): δ 155.0, 154.5, 139.5, 131.2 (q, *J* = 32.4 Hz), 127.9, 125.6 (q, *J* = 3.8 Hz), 123.7 (t, *J* = 270.6 Hz), 82.4, 82.2, 68.3, 55.17, 55.12, 55.07; **<sup>19</sup>F NMR** (376 MHz, CDCl<sub>3</sub>): δ -63.2; **IR** (neat): ν 2961, 1749, 1621, 1443, 1376, 1244, 1123 cm<sup>-1</sup>; **MS** (ESI) *m/z* 369.1 [M+Na]<sup>+</sup>; **HRMS** (ESI) Calcd for C<sub>15</sub>H<sub>13</sub>O<sub>6</sub>F<sub>3</sub>Na [M+Na]<sup>+</sup>: 369.0556, Found: 369.0559.

(5) Dimethyl 1-(4-methoxycarbonyl)but-2-yn-1,4-diyl dicarbonate **1f**<sup>3</sup> (zzn-1-041)

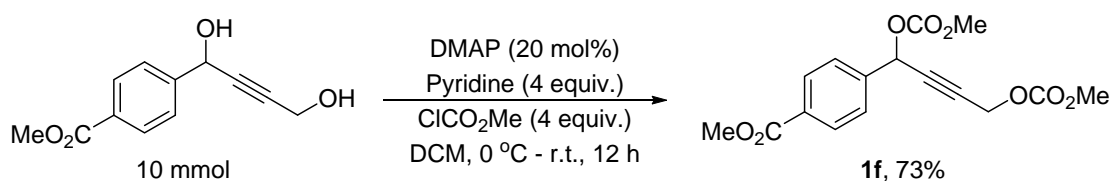

Following the **Typical Procedure II**, the reaction of 1-(4-methoxycarbonyl)but-2-yn-1,4-diol (2.2021 g, 10 mmol), CH<sub>2</sub>Cl<sub>2</sub> (40 mL), DMAP (245.0 mg, 2 mmol), pyridine (3.2 mL, d = 0.983 g/mL, 3.1456 g, 40 mmol) and methyl chloroformate (3.1 mL, d = 1.22 g/mL, 3.78 g, 40 mmol) afforded **1f** (2.4680 g, 73%) (eluent: petroleum ether / ethyl acetate = 6/1 (1050 mL)) as a yellow oil; **<sup>1</sup>H NMR** (400 MHz, CDCl<sub>3</sub>): δ 8.06 (d, *J* = 8.0 Hz, 2 H, ArH), 7.59 (d, *J* = 8.4 Hz, 2 H, ArH), 6.37 (s, 1 H, CH), 4.83 (d, *J* = 0.8 Hz, 2 H, CH<sub>2</sub>), 3.92 (s, 3 H, OCH<sub>3</sub>), 3.82 (m, 6 H, 2 × OCH<sub>3</sub>); **<sup>13</sup>C NMR** (100 MHz, CDCl<sub>3</sub>): δ 166.3, 155.0, 154.5, 140.3, 130.9, 129.9, 127.4, 82.5, 82.1, 68.5, 55.2, 55.1, 52.2; **IR** (neat): ν 3005, 2958, 2854, 2350, 1749, 1721, 1613, 1440, 1375, 1242; **MS** (ESI) *m/z* 359.1 [M+Na]<sup>+</sup>; **HRMS** (ESI) Calcd for C<sub>16</sub>H<sub>16</sub>O<sub>8</sub>Na [M+Na]<sup>+</sup>: 359.0737, Found: 359.0734.

(6) Dimethyl 1-(4-(benzyloxy)phenyl)but-2-yn-1,4-diyl dicarbonate **1g**<sup>3</sup> (lican-05-076)

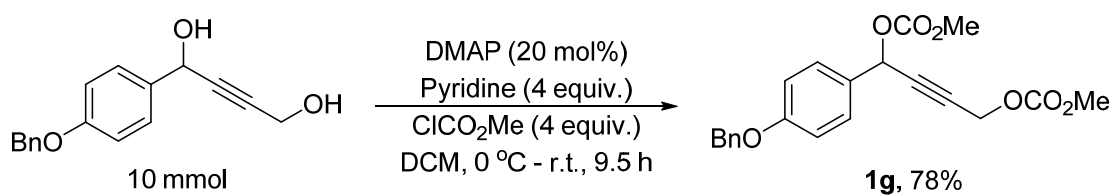

Following the **Typical Procedure II**, the reaction of 1-(4-(benzyloxy)phenyl)but-2-yn-1,4-diol (2.6816 g, 10 mmol), CH<sub>2</sub>Cl<sub>2</sub> (40 mL), DMAP (244.9 mg, 2 mmol), pyridine (3.2 mL, d = 0.983, 3.1456 g, 40 mmol) and methyl chloroformate (3.1 mL, d = 1.22 g/mL, 3.78 g, 40 mmol) afforded **1g** (3.0082 g, 78%) (eluent: petroleum ether (0.5% NEt<sub>3</sub>) / ethyl acetate = 5/1 (1800 mL)) as a yellowish solid: **m.p.** 80.3-81.9 °C (hexane / ethyl acetate); **<sup>1</sup>H NMR** (400 MHz, CDCl<sub>3</sub>): δ 7.51-7.26 (m, 7 H, ArH), 6.95 (d, *J* = 8.4 Hz, 2 H, ArH), 6.28 (s, 1 H, CH), 5.04 (s, 2 H, CH<sub>2</sub>), 4.79 (d, *J* = 1.6 Hz, 2 H, CH<sub>2</sub>), 3.77 (s, 3 H, OCH<sub>3</sub>), 3.75 (s, 3 H, OCH<sub>3</sub>); **<sup>13</sup>C NMR** (100 MHz, CDCl<sub>3</sub>): δ 159.5, 155.0, 154.7, 136.6, 129.3, 128.5, 128.1, 127.9, 127.3, 114.8, 83.3, 81.3, 69.9, 69.0, 55.3, 55.0, 54.9; **IR** (neat): ν 2964, 2910, 2863, 1747, 1512, 1443, 1247 cm<sup>-1</sup>; **MS** (70 eV, EI) *m/z* (%): 384 (M<sup>+</sup>, 0.53), 309 [(M-OCO<sub>2</sub>Me)<sup>+</sup>, 9.17], 91 (100); **Elem. Anal.** Calcd. for C<sub>21</sub>H<sub>20</sub>O<sub>7</sub>: C, 65.62; H, 5.24, found C, 65.25; H, 5.18.

(7) Dimethyl 1-(benzo[*d*][1,3]dioxol-5-yl)but-2-yn-1,4-diyl dicarbonate **1h**<sup>3</sup> (zzn-1-081)

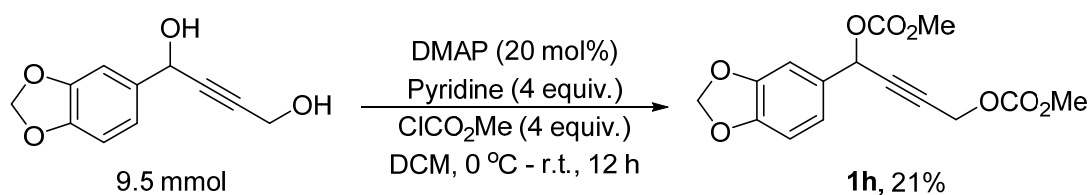

Following the **Typical Procedure II**, the reaction of 1-(benzo[*d*][1,3]dioxol-5-yl)but-2-yn-1,4-diol (1.9580 g, 9.5 mmol), CH<sub>2</sub>Cl<sub>2</sub> (40 mL), DMAP (232.6 mg, 1.9 mmol), pyridine (3.1 mL, d = 0.983, 3.0473 g, 38.5 mmol) and methyl chloroformate (3.0 mL, d = 1.22 g/mL, 3.6600 g, 39 mmol) afforded **1h** (634.6 mg, 21%) (eluent: petroleum ether / ethyl acetate = 8/1 (900 mL)) as an orange oil; **<sup>1</sup>H NMR** (400 MHz, CDCl<sub>3</sub>): δ 7.00-6.98 (m, 2 H, ArH), 6.78 (d, *J* = 7.6 Hz, 1 H, ArH), 6.23 (s, 1 H, CH), 5.97 (s, 2 H, CH<sub>2</sub>), 4.81 (s, 2 H, CH<sub>2</sub>), 3.81 (s, 3 H, OCH<sub>3</sub>), 3.79 (s,



3 H, OCH<sub>3</sub>); <sup>13</sup>C NMR (100 MHz, CDCl<sub>3</sub>): δ 154.9, 154.6, 148.4, 147.8, 129.4, 121.9, 108.1, 108.0, 101.3, 83.1, 81.3, 69.1, 55.3, 55.1, 55.0; IR (neat): ν 2959, 2902, 1745, 1611, 1503, 1489, 1442, 1374, 1234; MS (ESI) *m/z* 345.1 [M+Na]<sup>+</sup>; HRMS (ESI) Calcd for C<sub>15</sub>H<sub>14</sub>O<sub>8</sub>Na [M+Na]<sup>+</sup>: 345.0581, Found: 345.0582.

(8) Dimethyl 1-(2-fluorophenyl)but-2-yn-1,4-diyl dicarbonate **1i**<sup>3</sup> (zzn-1-013)

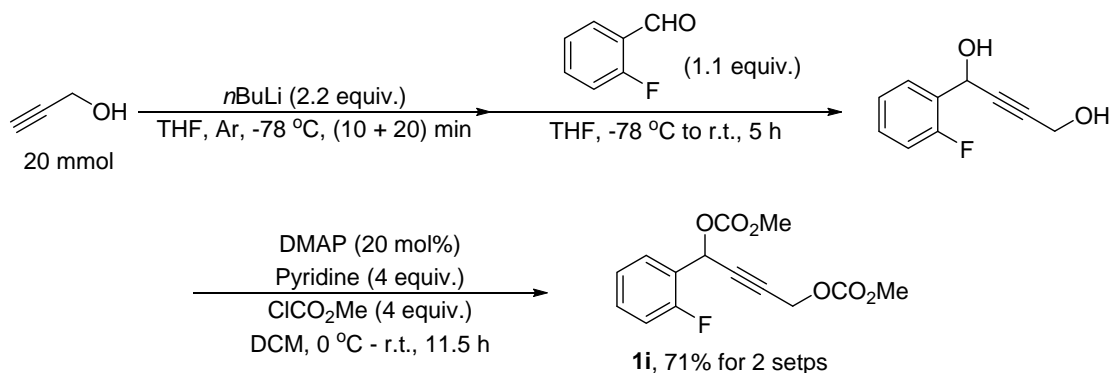

Following the **Typical Procedure I**, the reaction of propargyl alcohol (1.16 mL, *d* = 0.963 g/mL, 1.1171 g, 20 mmol), *n*BuLi (2.5 M in hexane, 17.6 mL, 44 mmol), 2-fluorobenzaldehyde (2.5601 g, 22 mmol) in THF (60 mL) afforded the crude product, and which was used in the next step without further purification.

Following the **Typical Procedure II**, the reaction of the crude product, CH<sub>2</sub>Cl<sub>2</sub> (60 mL), DMAP (489.0 mg, 4 mmol), pyridine (6.4 mL, *d* = 0.983 g/mL, 6.2912 g, 80 mmol) and methyl chloroformate (6.2 mL, *d* = 1.22 g/mL, 7.5640 g, 80 mmol) afforded **1i** (4.2259 g, 71% for 2 steps) (eluent: petroleum ether / ethyl acetate = 15/1 (480 mL) to petroleum ether / ethyl acetate = 12/1 (520 mL) to petroleum ether / ethyl acetate = 7/1 (800 mL)) as a yellow oil: <sup>1</sup>H NMR (400 MHz, CDCl<sub>3</sub>): δ 7.64 (td, *J*<sub>1</sub> = 7.4 Hz, *J*<sub>2</sub> = 1.6 Hz, 1 H, ArH), 7.42-7.33 (m, 1 H, ArH), 7.23-7.15 (m, 1 H, ArH), 7.13-7.04 (m, 1 H, ArH), 6.61 (s, 1 H, CH), 4.83 (d, *J* = 1.6 Hz, 2 H, CH<sub>2</sub>), 3.88-3.77 (m, 6 H, 2 × OCH<sub>3</sub>); <sup>13</sup>C NMR (100 MHz, CDCl<sub>3</sub>): δ 160.1 (d, *J* = 249.0 Hz), 155.0, 154.5, 131.3 (d, *J* = 8.4 Hz), 129.5 (d, *J* = 3.1 Hz), 124.4 (d, *J* = 3.1 Hz), 123.1 (d, *J* = 13.0 Hz), 115.7 (d, *J* = 21.4 Hz), 82.3, 81.6, 63.3 (d, *J* = 5.4 Hz), 55.4, 55.22, 55.20; <sup>19</sup>F NMR (376 MHz, CDCl<sub>3</sub>): -118.0; IR (neat): ν 2960, 1748, 1617, 1591, 1493, 1442, 1244 cm<sup>-1</sup>; MS (ESI) *m/z* 319.1 [M+Na]<sup>+</sup>; HRMS (ESI) Calcd for C<sub>14</sub>H<sub>13</sub>O<sub>6</sub>FNa [M+Na]<sup>+</sup>: 319.0588, Found: 319.0588.

(9) Dimethyl 1-(3-fluorophenyl)but-2-yn-1,4-diyl dicarbonate **1j**<sup>3</sup> (zzn-1-011)

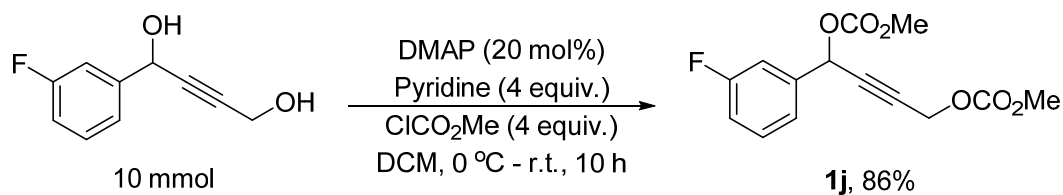

Following the **Typical Procedure II**, the reaction of 1-(3-fluorophenyl)but-2-yn-1,4-diol (1.8081 g, 10 mmol), CH<sub>2</sub>Cl<sub>2</sub> (40 mL), DMAP (244.5 mg, 2 mmol), pyridine (3.2 mL, d = 0.983, 3.1456 g, 40 mmol) and methyl chloroformate (3.1 mL, d = 1.22 g/mL, 3.78 g, 40 mmol) afforded **1j** (2.5650 g, 86%) (eluent: petroleum ether / ethyl acetate = 9/1 (1000 mL)) as a yellow oil; <sup>1</sup>H NMR (400 MHz, CDCl<sub>3</sub>): δ 7.39-7.23 (m, 3 H, ArH), 7.07 (t, *J* = 7.6 Hz, 1 H, ArH), 6.32 (s, 1 H, CH), 4.86 (s, 2 H, CH<sub>2</sub>), 3.82 (s, 6 H, 2 × OCH<sub>3</sub>); <sup>13</sup>C NMR (100 MHz, CDCl<sub>3</sub>): δ 162.7 (d, *J* = 245.7 Hz), 155.0, 154.6, 138.0 (d, *J* = 7.2 Hz), 130.3 (d, *J* = 8.1 Hz), 123.2 (d, *J* = 2.8 Hz), 116.3 (d, *J* = 21.0 Hz), 114.7 (d, *J* = 23.0 Hz), 82.6, 81.9, 68.4 (d, *J* = 2.1 Hz), 55.3, 55.22, 55.18; <sup>19</sup>F NMR (376 MHz, CDCl<sub>3</sub>): -112.5; IR (neat): ν 3010, 2960, 2857, 1747, 1616, 1594, 1488, 1442, 1375, 1241 cm<sup>-1</sup>; MS (ESI) *m/z* 319.1 [M+Na]<sup>+</sup>; HRMS (ESI) Calcd for C<sub>14</sub>H<sub>13</sub>O<sub>6</sub>FNa [M+Na]<sup>+</sup>: 319.0588, Found: 319.0588.

(10) Compound **1k**<sup>3</sup> (zzn-1-065)

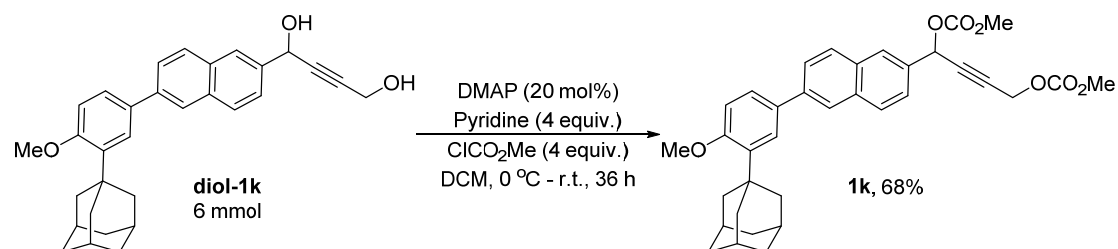

Following the **Typical Procedure II**, the reaction of **diol-1k** (2.7132 g, 6 mmol), CH<sub>2</sub>Cl<sub>2</sub> (40 mL), DMAP (149.0 mg, 1.2 mmol), pyridine (1.93 mL, d = 0.983, 1.8972 g, 24 mmol) and methyl chloroformate (1.9 mL, d = 1.22 g/mL, 2.3180 g, 25 mmol) afforded **1k** (2.3240 g, 68%) (eluent: petroleum ether / ethyl acetate = 8/1 (1350 mL)) as a yellow solid (we were not able to obtain the crystal from the solvent tested, the **m.p.** was determined by using the solid after evaporation of the eluent. When the

white solid was heated up to 49.2 °C, it shrank. At 58.0 °C, the solid started melting. At 64.5 °C, the sample was completely melted and the color of the liquid was yellow); **<sup>1</sup>H NMR** (400 MHz, CDCl<sub>3</sub>): δ 7.98 (s, 2 H, ArH), 7.90 (d, *J* = 8.4 Hz, 2 H, ArH), 7.76 (d, *J* = 8.4 Hz, 1 H, ArH), 7.65-7.57 (m, 2 H, ArH), 7.53 (d, *J* = 8.0 Hz, 1 H, ArH), 6.99 (d, *J* = 8.4 Hz, 1 H, ArH), 6.50 (s, 1 H, CH), 4.86 (s, 2 H, CH<sub>2</sub>), 3.90 (s, 3 H, OCH<sub>3</sub>), 3.82 (s, 6 H, 2 × OCH<sub>3</sub>), 2.19 (s, 6 H, 3 × CH<sub>2</sub>), 2.10 (s, 3 H, 3 × CH), 1.80 (s, 6 H, 3 × CH<sub>2</sub>); **<sup>13</sup>C NMR** (100 MHz, CDCl<sub>3</sub>): δ 158.7, 155.1, 154.8, 139.9, 138.9, 134.0, 132.8, 132.6, 131.7, 128.9, 128.7, 127.1, 126.3, 125.8, 125.6, 125.1, 124.7, 112.1, 83.3, 81.8, 69.6, 55.5, 55.20, 55.15, 55.14, 40.6, 37.2, 37.1, 29.1; **IR** (neat): ν 2901, 2847, 1748, 1604, 1496, 1441, 1372, 1321, 1235; **MS** (ESI) *m/z* 591.2 [M+Na]<sup>+</sup>; **Elem. Anal.** Calcd. for C<sub>35</sub>H<sub>36</sub>O<sub>7</sub>: C, 73.92; H, 6.38, found C, 74.04; H, 6.25.

(11) Dimethyl undec-2-yn-1,4-diyl dicarbonate **11**<sup>3</sup> (zzn-1-060)

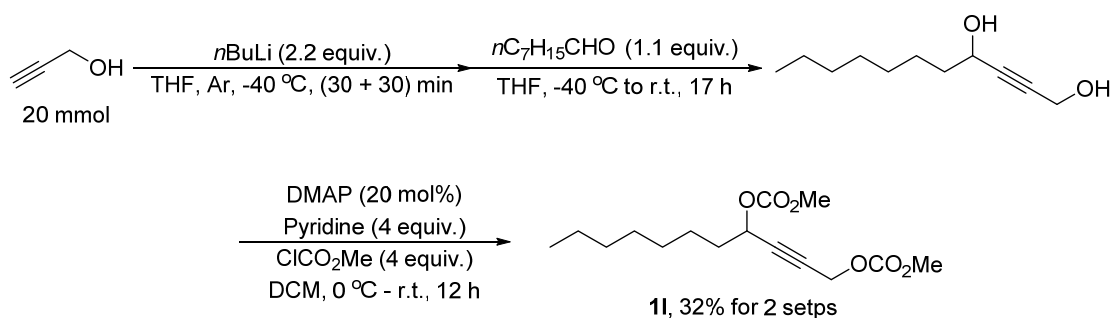

Following the **Typical Procedure I**, the reaction of propargyl alcohol (1.16 mL, *d* = 0.963 g/mL, 1.1171 g, 20 mmol), *n*BuLi (2.5 M in hexane, 17.6 mL, 44 mmol), octanal (3.44 mL, *d* = 0.821 g/mL, 2.8242 g, 22 mmol) in THF (60 mL) afforded the crude product, and which was used in the next step without further purification.

Following the **Typical Procedure II**, the reaction of the crude product, CH<sub>2</sub>Cl<sub>2</sub> (40 mL), DMAP (0.2279 g, 1.8 mmol), pyridine (2.9 mL, *d* = 0.983 g/mL, 2.85 g, 36 mmol) and methyl chloroformate (2.8 mL, *d* = 1.22 g/mL, 3.4160 g, 36 mmol) afforded **11** (1.9264 g, 32% for 2 steps) (eluent: petroleum ether / ethyl acetate = 18/1 (950 mL)) as a colorless oil; **<sup>1</sup>H NMR** (400 MHz, CDCl<sub>3</sub>): δ 5.25 (t, *J* = 6.6 Hz, 1 H, CH), 4.77 (d, *J* = 1.6 Hz, 2 H, CH<sub>2</sub>), 3.90-3.71 (m, 6 H, 2 × OCH<sub>3</sub>), 1.84-1.77 (m, 2 H, CH<sub>2</sub>), 1.46-1.41 (m, 2 H, CH<sub>2</sub>), 1.30-1.28 (m, 8 H, 4 × CH<sub>2</sub>), 0.88 (t, *J* = 6.6 Hz, 3 H,

CH<sub>3</sub>); <sup>13</sup>C NMR (100 MHz, CDCl<sub>3</sub>): 154.9, 154.8, 84.2, 79.5, 67.7, 55.3, 54.9, 54.7, 34.3, 31.5, 28.9, 28.8, 24.6, 22.4, 13.9; IR (neat): ν 2956, 2928, 2857, 1749, 1442, 1375, 1246, 1159 cm<sup>-1</sup>; MS (ESI) *m/z* 323.1 [M+Na]<sup>+</sup>; HRMS (ESI) Calcd for C<sub>15</sub>H<sub>24</sub>O<sub>6</sub>Na [M+Na]<sup>+</sup>: 323.1465, Found: 323.1466.

(12) Dimethyl 1-cyclohexylbut-2-yn-1,4-diyl dicarbonate **1m**<sup>3</sup> (zzn-1-076)

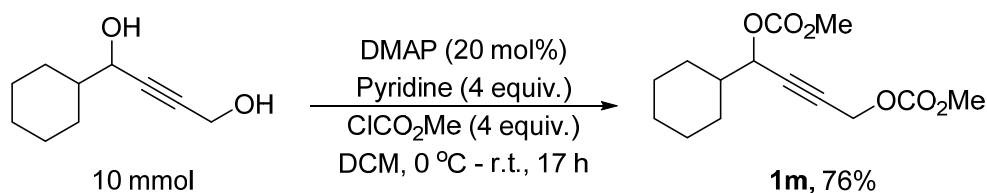

Following the **Typical Procedure II**, the reaction of 1-cyclohexylbut-2-yn-1,4-diol (1.6820 g, 10 mmol), CH<sub>2</sub>Cl<sub>2</sub> (40 mL), DMAP (244.9 mg, 2 mmol), pyridine (3.2 mL, d = 0.983, 3.1456 g, 40 mmol) and methyl chloroformate (3.1 mL, d = 1.22 g/mL, 3.78 g, 40 mmol) afforded **1m** (2.2034 g, 76%) (eluent: petroleum ether / ethyl acetate = 5/1 (1200 mL)) as a colorless liquid; <sup>1</sup>H NMR (400 MHz, CDCl<sub>3</sub>): 5.09 (d, *J* = 4.8 Hz, 1 H, CH), 4.78 (s, 2 H, CH<sub>2</sub>), 3.95-3.64 (m, 6 H, 2 × OCH<sub>3</sub>), 1.98-1.53 (m, 6 H), 1.35-0.94 (m, 5 H); <sup>13</sup>C NMR (100 MHz, CDCl<sub>3</sub>): δ 155.0, 83.3, 80.3, 72.1, 55.4, 55.1, 54.9, 41.7, 28.2, 27.9, 26.0, 25.6, 25.5; IR (neat): ν 2930, 2855, 1747, 1442, 1375, 1347, 1245; MS (ESI) *m/z* 307.1 [M+Na]<sup>+</sup>; HRMS (ESI) Calcd for C<sub>14</sub>H<sub>20</sub>O<sub>6</sub>Na [M+Na]<sup>+</sup>: 307.1152, Found: 307.1153.

(13) Dimethyl pentadeca-2,12-diyn-1,4-diyl dicarbonate **1n**<sup>6</sup> (lican-06-047)

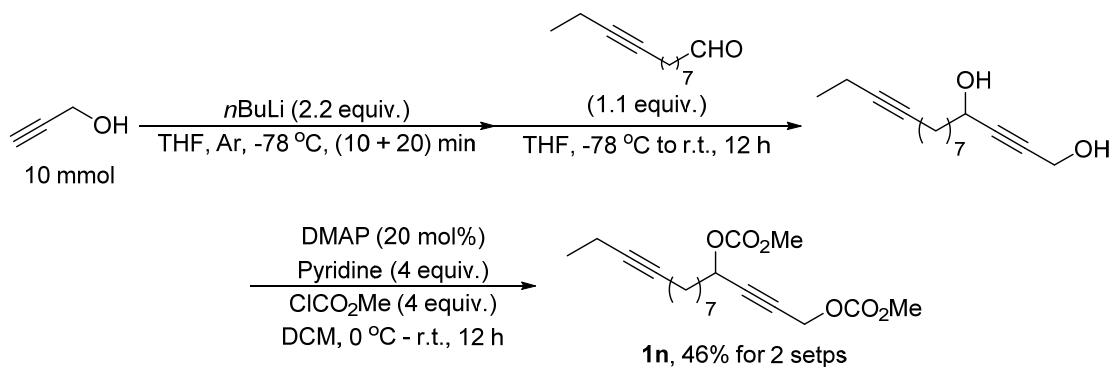

Following the **Typical Procedure I**, the reaction of propargyl alcohol (583 μL, d = 0.963 g/mL, 561.4 mg, 10 mmol), *n*BuLi (2.5 M in hexane, 8.8 mL, 22 mmol),

dodec-9-ynal<sup>4</sup> (1.9872 g, 11 mmol) in THF (60 mL) afforded the reaction mixture. After quenching, filtration, evaporation of the solvent and chromatography on silica gel (eluent: petroleum ether / ethyl acetate = 1.5/1 (1500 mL)) afforded crude product (1.3301 g, 56%) as a yellowish oil. The crude product was used in the next step without further purification.

Following the **Typical Procedure II**, the reaction of the crude product (1.1802 g, 5 mmol), CH<sub>2</sub>Cl<sub>2</sub> (20 mL), DMAP (122.4 mg, 1 mmol), pyridine (1.61 mL, d = 0.983 g/mL, 1.5778 g, 20 mmol) and methyl chloroformate (1.55 mL, d = 1.22 g/mL, 1.89 g, 20 mmol) afforded **1n** (1.4372 g, 46% for 2 steps) (eluent: petroleum ether / ethyl acetate = 15/1 (960 mL)) as a colorless oil: <sup>1</sup>H NMR (400 MHz, CDCl<sub>3</sub>): δ 5.24 (t, *J* = 6.6 Hz, 1 H, CH), 4.77 (s, 2 H, CH<sub>2</sub>), 3.89-3.72 (m, 6 H, 2 × OCH<sub>3</sub>), 2.21-2.08 (m, 4 H, 2 × CH<sub>2</sub>), 1.86-1.73 (m, 2 H, CH<sub>2</sub>), 1.52-1.40 (m, 4 H, 2 × CH<sub>2</sub>), 1.40-1.25 (m, 6 H, 3 × CH<sub>2</sub>), 1.11 (t, *J* = 7.2 Hz, 3 H, CH<sub>3</sub>); <sup>13</sup>C NMR (100 MHz, CDCl<sub>3</sub>): δ 154.9, 154.7, 84.1, 81.4, 79.5, 79.2, 67.6, 55.2, 54.9, 54.7, 34.3, 28.8, 28.71, 28.69, 28.5, 24.5, 18.5, 14.2, 12.2; IR (neat): ν 2932, 2857, 1749, 1442, 1375, 1248, 1163 cm<sup>-1</sup>; MS (FI) *m/z* 352 [M]<sup>+</sup>; HRMS (FI) Calcd for C<sub>19</sub>H<sub>28</sub>O<sub>6</sub> [M]<sup>+</sup>: 352.1880, Found: 352.1885.

## 2. Synthesis of trisubstituted 2,3-allenyl malonates

(1) Dimethyl 2-(2-phenyl-4-(2-naphthyl)buta-2,3-dienyl) malonate **4aaa** (lican-05-072)

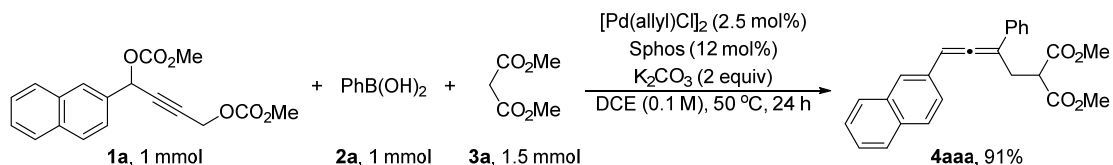

**Typical Procedure III:** To a flame-dried Schlenk tube were added **1a** (328.3 mg, 1 mmol), [Pd(allyl)Cl]<sub>2</sub> (9.2 mg, 0.025 mmol), Sphos (49.5 mg, 0.12 mmol), **2a** (122.3 mg, 1 mmol), and K<sub>2</sub>CO<sub>3</sub> (275.0 mg, 2 mmol). After the addition, the Schlenk tube was degassed and refilled with Ar for three times to ensure the complete exclusion of air. Then DCE (5 mL), **3a** (171 μL, d = 1.156 g/mL, 197.7 mg, 1.5 mmol), and DCE

(5 mL) were added sequentially under argon atmosphere. The resulting mixture was stirred at 50 °C for 24 h as monitored by TLC, filtered through a short column of silica gel (3 cm) eluted with ethyl acetate (30 mL), and concentrated. The residue was purified by column chromatography on silica gel to afford **4aaa** (351.8 mg, 91%) [eluent: petroleum ether / ethyl ether = 9/1 (1000 mL)] as a white solid: **m.p.** 113.7-115.1 °C (hexane / ethyl acetate); **<sup>1</sup>H NMR** (400 MHz, CDCl<sub>3</sub>): δ 7.85-7.73 (m, 3 H, ArH), 7.70 (s, 1 H, ArH), 7.53-7.38 (m, 5 H, ArH), 7.34 (t, *J* = 7.6 Hz, 2 H, ArH), 7.26 (t, *J* = 6.0 Hz, 1 H, ArH), 6.78 (t, *J* = 3.2 Hz, 1 H, CH), 3.79 (dd, *J*<sub>1</sub> = 8.8 Hz, *J*<sub>2</sub> = 6.0 Hz, 1 H, CH), 3.72 (s, 3 H, OCH<sub>3</sub>), 3.42-3.27 (m, 4 H, OCH<sub>3</sub> and one proton of CH<sub>2</sub>), 3.22-3.11 (m, 1 H, one proton of CH<sub>2</sub>); **<sup>13</sup>C NMR** (100 MHz, CDCl<sub>3</sub>): δ 205.7, 169.5, 169.1, 135.1, 133.6, 132.9, 131.1, 128.6, 128.3, 127.8, 127.7, 127.6, 126.3, 126.02, 126.01, 125.9, 124.7, 107.9, 100.7, 52.7, 52.5, 50.2, 29.1; **IR** (neat): ν 3049, 2959, 2921, 1936, 1723, 1596, 1439, 1294, 1249, 1196, 1157 cm<sup>-1</sup>; **Raman**: ν 3056, 2954, 2913, 1936, 1749, 1626, 1597, 1506, 1468, 1435, 1380, 1226, 1161 cm<sup>-1</sup>; **MS** (70 eV, EI) *m/z* (%): 386 (M<sup>+</sup>, 7.16), 254 (100); **Elem. Anal.** Calcd. for C<sub>25</sub>H<sub>22</sub>O<sub>4</sub>: C, 77.70; H, 5.74, found C, 77.48; H, 5.87.

(2) Preparation of dimethyl 2-(2-phenyl-4-(2-naphthyl)buta-2,3-dienyl) malonate **4aaa** on gram scale (lican-05-094)

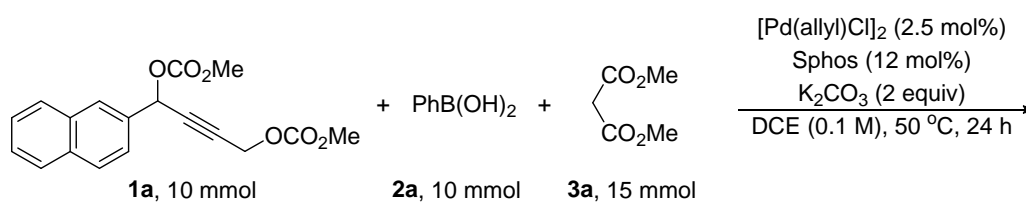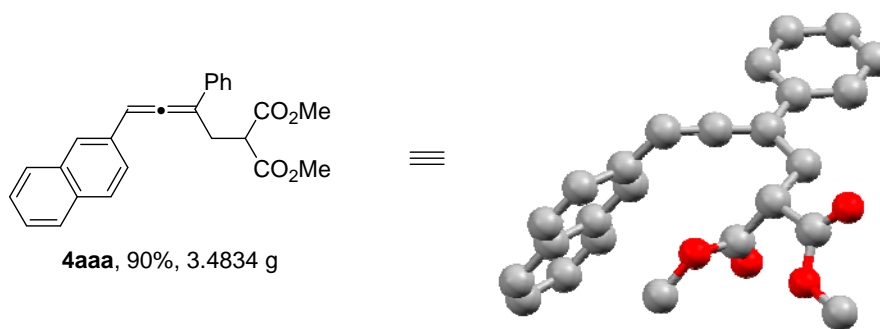

Following the **Typical Procedure III**, the reaction of [Pd(allyl)Cl]<sub>2</sub> (91.9 mg, 0.25 mmol), Sphos (495.0 mg, 1.2 mmol), **1a** (3.2851 g, 10 mmol), **2a** (1.2186 g, 10 mmol), K<sub>2</sub>CO<sub>3</sub> (2.7674 g, 20 mmol), **3a** (1.7 mL, d = 1.156, 1.9652 g, 15 mmol), and DCE (10 mL) afforded **4aaa** (3.4834 g, 90%) [eluent: petroleum ether / ethyl acetate = 9/1 (1000 mL) to petroleum ether / ethyl acetate = 4/1 (1000 mL)] as a light brown solid; <sup>1</sup>H NMR (400 MHz, CDCl<sub>3</sub>): δ 7.87-7.73 (m, 3 H, ArH), 7.70 (s, 1 H, ArH), 7.56-7.39 (m, 5 H, ArH), 7.34 (t, *J* = 7.6 Hz, 2 H, ArH), 7.29-7.21 (m, 1 H, ArH), 6.78 (t, *J* = 3.4 Hz, 1 H, CH), 3.79 (dd, *J*<sub>1</sub> = 8.8 Hz, *J*<sub>2</sub> = 6.0 Hz, 1 H, CH), 3.72 (s, 3 H, OCH<sub>3</sub>), 3.46-3.27 (m, 4 H, OCH<sub>3</sub> and one proton of CH<sub>2</sub>), 3.29 (ddd, *J*<sub>1</sub> = 15.8 Hz, *J*<sub>2</sub> = 5.8 Hz, *J*<sub>3</sub> = 3.8 Hz, 1 H, one proton of CH<sub>2</sub>); <sup>13</sup>C NMR (100 MHz, CDCl<sub>3</sub>): δ 205.7, 169.5, 169.1, 135.2, 133.7, 132.9, 131.2, 128.7, 128.3, 127.8, 127.7, 127.6, 126.0, 126.3, 125.9, 124.8, 107.9, 100.7, 52.7, 52.5, 50.2, 29.2.

Single crystal of **4aaa** (CCDC number: 2202991) was obtained by slow diffusion of hexane (4.0 mL) to a solution of **4aaa** (70 mg) in ethyl acetate (1 mL).

(3) Dimethyl 2-(2,4-diphenylbuta-2,3-dienyl) malonate **4baa** (lican-05-189)

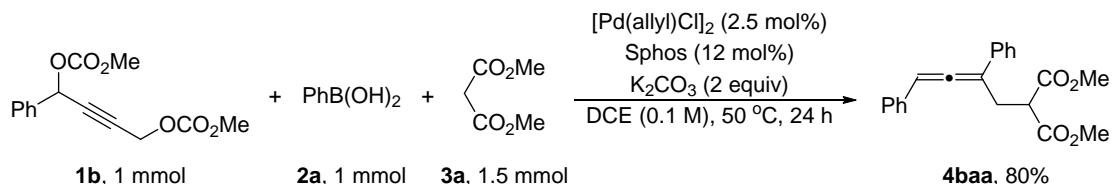

Following the **Typical Procedure III**, the reaction of [Pd(allyl)Cl]<sub>2</sub> (9.2 mg, 0.025 mmol), Sphos (49.4 mg, 0.12 mmol), **1b** (279.2 mg, 1 mmol), **2a** (122.3 mg, 1 mmol), K<sub>2</sub>CO<sub>3</sub> (278.8 mg, 2 mmol), **3a** (171 μL, d = 1.156, 197.7 mg, 1.5 mmol) and DCE (10 mL) afforded **4baa** (285.1 mg, 80%, purity = 95%) [eluent: petroleum ether / ethyl acetate = 15/1 (320 mL)] as a light green oil: <sup>1</sup>H NMR (400 MHz, CDCl<sub>3</sub>): δ 7.49-7.42 (m, 2 H, ArH), 7.36-7.29 (m, 3 H, ArH), 7.29-7.18 (m, 5 H, ArH), 6.59 (t, *J* = 3.6 Hz, 1 H, =CH), 3.76 (dd, *J*<sub>1</sub> = 8.8 Hz, *J*<sub>2</sub> = 6.0 Hz, 1 H, CH), 3.71 (s, 3 H, OCH<sub>3</sub>), 3.40 (s, 3 H, OCH<sub>3</sub>), 3.29 (ddd, *J*<sub>1</sub> = 15.7 Hz, *J*<sub>2</sub> = 8.7 Hz, *J*<sub>3</sub> = 3.5 Hz, 1 H, one proton of CH<sub>2</sub>), 3.13 (ddd, *J*<sub>1</sub> = 15.8 Hz, *J*<sub>2</sub> = 6.0 Hz, *J*<sub>3</sub> = 3.8 Hz, 1 H, one proton of CH<sub>2</sub>); <sup>13</sup>C NMR (100 MHz, CDCl<sub>3</sub>): δ 205.1, 169.5, 169.0, 135.1, 133.5, 128.63,

128.56, 127.5, 127.0, 125.9, 107.6, 100.3, 52.7, 52.3, 50.1, 29.0; **IR** (neat):  $\nu$  3028, 2952, 2845, 1936, 1732, 1596, 1493, 1434, 1331, 1148  $\text{cm}^{-1}$ ; **MS** (70 eV, EI)  $m/z$  (%): 336 ( $\text{M}^+$ , 7.43), 204 (100); **HRMS** (FI) Calcd for  $\text{C}_{21}\text{H}_{20}\text{O}_4$  [ $\text{M}$ ] $^+$ : 336.1356, Found: 336.1360.

(4) Dimethyl 2-(2-phenyl-4-(4-chlorophenyl)buta-2,3-dienyl) malonate **4caa** (lican-06-016)

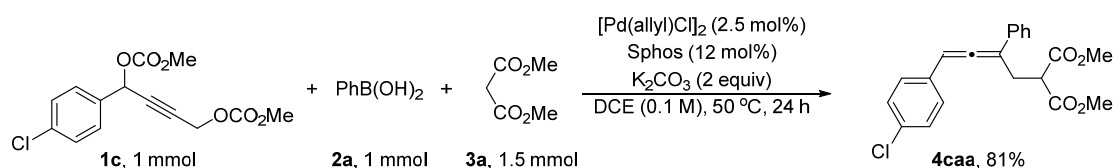

Following the **Typical Procedure III**, the reaction of  $[\text{Pd}(\text{allyl})\text{Cl}]_2$  (9.2 mg, 0.025 mmol), Sphos (49.5 mg, 0.12 mmol), **1c** (313.0 mg, 1 mmol), **2a** (122.3 mg, 1 mmol),  $\text{K}_2\text{CO}_3$  (277.5 mg, 2 mmol), **3a** (171  $\mu\text{L}$ ,  $d = 1.156$ , 197.7 mg, 1.5 mmol) and DCE (10 mL) afforded **4caa** (300.2 mg, 81%) [eluent: petroleum ether / ethyl acetate = 15/1 (640 mL)] as a white solid: **m.p.** 63.4-65.0 °C (hexane);  **$^1\text{H}$  NMR** (400 MHz,  $\text{CDCl}_3$ ):  $\delta$  7.43 (d,  $J = 7.6$  Hz, 2 H, ArH), 7.33 (d,  $J = 7.4$  Hz, 2 H, ArH), 7.30-7.16 (m, 5 H, ArH), 6.60-6.51 (m, 1 H, =CH), 3.83-3.64 (m, 4 H,  $\text{OCH}_3$  and CH), 3.44 (s, 3 H,  $\text{OCH}_3$ ), 3.29 (ddd,  $J_1 = 15.7$  Hz,  $J_2 = 8.9$  Hz,  $J_3 = 3.3$  Hz, 1 H, one proton of  $\text{CH}_2$ ), 3.18-3.06 (m, 1 H, one proton of  $\text{CH}_2$ );  **$^{13}\text{C}$  NMR** (100 MHz,  $\text{CDCl}_3$ ):  $\delta$  205.3, 169.4, 169.0, 134.8, 133.1, 132.1, 128.8, 128.6, 128.2, 127.7, 125.9, 108.1, 99.3, 52.7, 52.5, 50.1, 29.0; **IR** (neat):  $\nu$  3085, 3052, 2955, 2919, 1935, 1748, 1731, 1596, 1489, 1434, 1345, 1263  $\text{cm}^{-1}$ ; **MS** (70 eV, EI)  $m/z$  (%): 370 ( $\text{M}^{(35)\text{Cl}}$  $^+$ , 9.37), 372 ( $\text{M}^{(37)\text{Cl}}$  $^+$ , 3.34), 238 (100); **Elem. Anal.** Calcd. for  $\text{C}_{21}\text{H}_{19}\text{ClO}_4$ : C, 68.02; H, 5.16, found C, 67.92; H, 5.28.

(5) Dimethyl 2-(2-phenyl-4-(4-cyanophenyl)buta-2,3-dienyl) malonate **4daa** (lican-05-116)



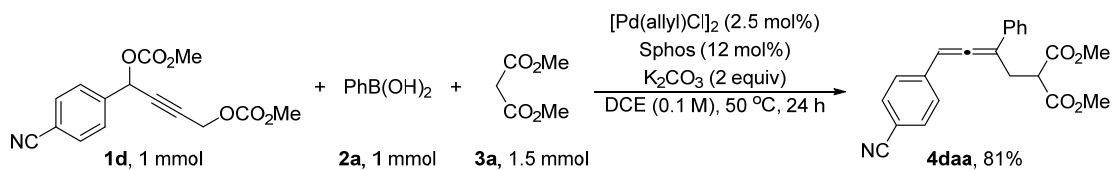

Following the **Typical Procedure III**, the reaction of  $[\text{Pd}(\text{allyl})\text{Cl}]_2$  (9.2 mg, 0.025 mmol), Sphos (49.5 mg, 0.12 mmol), **1d** (304.0 mg, 1 mmol), **2a** (121.7 mg, 1 mmol),  $\text{K}_2\text{CO}_3$  (275.0 mg, 2 mmol), **3a** (171  $\mu\text{L}$ ,  $d = 1.156$ , 197.7 mg, 1.5 mmol) and DCE (10 mL) afforded **4daa** (294.2 mg, 81%) [eluent: petroleum ether / acetone = 15/1 (960 mL)] as a yellowish oil:  $^1\text{H NMR}$  (400 MHz,  $\text{CDCl}_3$ ):  $\delta$  7.57 (d,  $J = 8.4$  Hz, 2 H, ArH), 7.43 (d,  $J = 7.2$  Hz, 2 H, ArH), 7.39-7.30 (m, 4 H, ArH), 7.26 (t,  $J = 7.4$  Hz, 1 H, ArH), 6.62 (t,  $J = 3.4$  Hz, 1 H, =CH), 3.78-3.66 (m, 4 H,  $\text{CH}_3$  and one proton of  $\text{CH}_2$ ), 3.43 (s, 3 H,  $\text{OCH}_3$ ), 3.32 (ddd,  $J_1 = 16.0$  Hz,  $J_2 = 8.8$  Hz,  $J_3 = 3.6$  Hz, 1 H, one proton of  $\text{CH}_2$ ), 3.15 (ddd,  $J_1 = 15.9$  Hz,  $J_2 = 5.7$  Hz,  $J_3 = 3.7$  Hz, 1 H, one proton of  $\text{CH}_2$ );  $^{13}\text{C NMR}$  (100 MHz,  $\text{CDCl}_3$ ):  $\delta$  206.4, 168.8, 168.5, 138.4, 133.7, 132.1, 128.4, 127.6, 127.1, 125.7, 118.5, 110.2, 108.4, 98.9, 52.4, 52.0, 49.6, 28.6; **IR** (neat):  $\nu$  2954, 2254, 2227, 1936, 1732, 1603, 1435, 1151  $\text{cm}^{-1}$ ; **MS** (70 eV, EI)  $m/z$  (%): 361 ( $\text{M}^+$ , 12.81), 229 (100); **HRMS** (ESI) Calcd for  $\text{C}_{22}\text{H}_{20}\text{O}_4\text{N}$   $[\text{M}+\text{H}]^+$ : 362.1387, Found: 362.1384.

(6) Dimethyl 2-(2-(phenyl-4-(4-(trifluoromethyl)phenyl)buta-2,3-dienyl) malonate **4eaa** (lican-06-034)

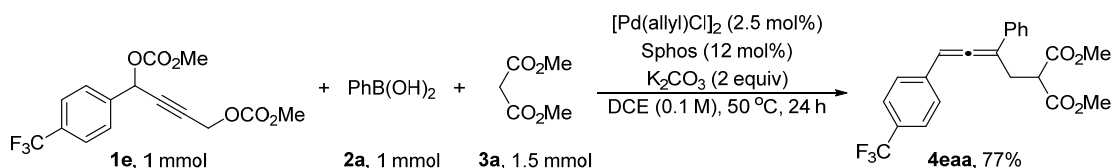

Following the **Typical Procedure III**, the reaction of  $[\text{Pd}(\text{allyl})\text{Cl}]_2$  (9.3 mg, 0.025 mmol), Sphos (49.3 mg, 0.12 mmol), **1e** (346.7 mg, 1 mmol), **2a** (121.9 mg, 1 mmol),  $\text{K}_2\text{CO}_3$  (277.0 mg, 2 mmol), **3a** (171  $\mu\text{L}$ ,  $d = 1.156$ , 197.7 mg, 1.5 mmol) and DCE (10 mL) afforded **4eaa** (310.4 mg, 77%) [eluent: petroleum ether / ethyl acetate = 15/1 (480 mL)] as a white solid: **m.p.** 69.5-71.1  $^\circ\text{C}$  (hexane);  $^1\text{H NMR}$  (400 MHz,  $\text{CDCl}_3$ ):  $\delta$  7.56 (d,  $J = 8.4$  Hz, 2 H, ArH), 7.44 (d,  $J = 7.6$  Hz, 2 H, ArH), 7.41-7.31 (m,

4 H, ArH), 7.27 (t,  $J = 7.4$  Hz, 1 H, ArH), 6.62 (t,  $J = 3.4$  Hz, 1 H, =CH), 3.78-3.67 (m, 4 H, OCH<sub>3</sub> and CH), 3.43 (s, 3 H, OCH<sub>3</sub>), 3.31 (ddd,  $J_1 = 16.0$  Hz,  $J_2 = 8.6$  Hz,  $J_3 = 3.4$  Hz, 1 H, one proton of CH<sub>2</sub>), 3.15 (ddd,  $J_1 = 16.0$  Hz,  $J_2 = 5.8$  Hz,  $J_3 = 3.8$  Hz, 1 H, one proton of CH<sub>2</sub>); <sup>13</sup>C NMR (100 MHz, CDCl<sub>3</sub>): δ 206.2, 169.3, 168.9, 137.6, 134.4, 129.3 (q,  $J = 32.2$  Hz), 128.7, 127.9, 127.1, 126.0, 125.6 (q,  $J = 3.6$  Hz), 124.1 (q,  $J = 270.3$  Hz), 108.4, 99.3, 52.7, 52.4, 50.0, 29.0; <sup>19</sup>F NMR (376 MHz, CDCl<sub>3</sub>): -63.0; IR (neat): ν 3058, 2962, 2923, 1938, 1734, 1612, 1493, 1436, 1322, 1258, 1107 cm<sup>-1</sup>; MS (70 eV, EI)  $m/z$  (%): 404 (M<sup>+</sup>, 22.57), 272 (100); Elem. Anal. Calcd. for C<sub>22</sub>H<sub>19</sub>F<sub>3</sub>O<sub>4</sub>: C, 65.34; H, 4.74, found C, 65.17; H, 4.93.

(7) Dimethyl 2-(2-phenyl-4-(4-(methoxycarbonyl)phenyl)buta-2,3-dienyl) malonate **4faa** (lican-06-003)

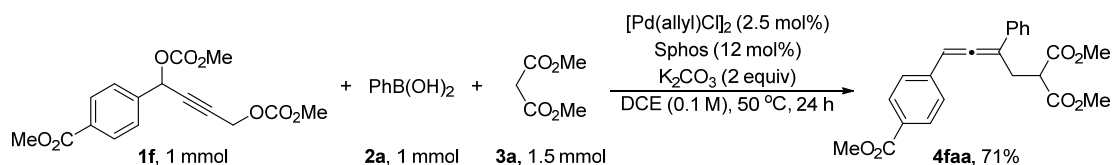

Following the **Typical Procedure III**, the reaction of [Pd(allyl)Cl]<sub>2</sub> (9.3 mg, 0.025 mmol), Sphos (49.3 mg, 0.12 mmol), **1f** (336.5 mg, 1 mmol), **2a** (122.1 mg, 1 mmol), K<sub>2</sub>CO<sub>3</sub> (276.8 mg, 2 mmol), **3a** (171 μL, d = 1.156, 197.7 mg, 1.5 mmol) and DCE (10 mL) afforded **4faa** (281.2 mg, 71%) [eluent: petroleum ether / ethyl acetate = 20/1 (630 mL)] as a yellow oil: <sup>1</sup>H NMR (400 MHz, CDCl<sub>3</sub>): δ 7.98 (d,  $J = 8.0$  Hz, 2 H, ArH), 7.4 (d,  $J = 8.0$  Hz, 2 H, ArH), 7.38-7.27 (m, 4 H, ArH), 7.23 (t,  $J = 7.4$  Hz, 1 H, ArH), 6.66-6.59 (m, 1 H, =CH), 3.86 (s, 3 H, OCH<sub>3</sub>), 3.75 (dd,  $J_1 = 8.6$  Hz,  $J_2 = 5.8$  Hz, 1 H, CH), 3.69 (s, 3 H, OCH<sub>3</sub>), 3.40 (s, 3 H, OCH<sub>3</sub>), 3.32 (ddd,  $J_1 = 15.9$  Hz,  $J_2 = 8.9$  Hz,  $J_3 = 3.1$  Hz, 1 H, one proton of CH<sub>2</sub>), 3.20-3.09 (m, 1 H, one proton of CH<sub>2</sub>); <sup>13</sup>C NMR (100 MHz, CDCl<sub>3</sub>): δ 206.1, 168.9, 168.5, 166.3, 138.3, 134.2, 129.7, 128.6, 128.4, 127.5, 126.6, 125.7, 107.9, 99.4, 52.3, 52.0, 51.6, 49.7, 28.7; IR (neat): ν 3000, 2952, 2849, 1936, 1745, 1730, 1714, 1604, 1493, 1437, 1274, 1109 cm<sup>-1</sup>; MS (70 eV, EI)  $m/z$  (%): 394 (M<sup>+</sup>, 12.61), 262 (100); HRMS (FI) Calcd for C<sub>23</sub>H<sub>22</sub>O<sub>6</sub> [M]<sup>+</sup>: 394.1411, Found: 394.1416.

(8) Dimethyl 2-(2-phenyl-4-(4-(benzyloxy)phenyl)buta-2,3-dienyl) malonate **4gaa**  
(lican-05-115)

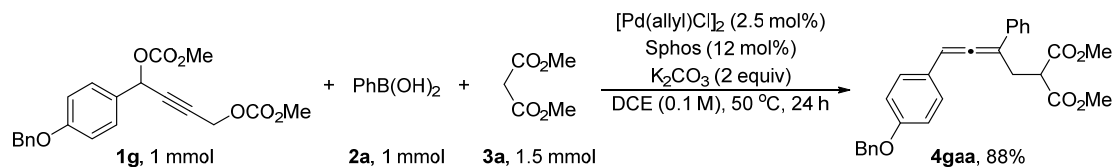

Following the **Typical Procedure III**, the reaction of  $[\text{Pd}(\text{allyl})\text{Cl}]_2$  (9.0 mg, 0.025 mmol), Sphos (49.3 mg, 0.12 mmol), **1g** (384.5 mg, 1 mmol), **2a** (122.2 mg, 1 mmol),  $\text{K}_2\text{CO}_3$  (277.0 mg, 2 mmol), **3a** (171  $\mu\text{L}$ ,  $d = 1.156$ , 197.7 mg, 1.5 mmol) and DCE (10 mL) afforded **4gaa** (389.8 mg, 88%) [eluent: petroleum ether / acetone = 10/1 (1100 mL)] as a colorless oil:  **$^1\text{H NMR}$**  (400 MHz,  $\text{CDCl}_3$ ):  $\delta$  7.43 (d,  $J = 7.6$  Hz, 2 H, ArH), 7.35 (d,  $J = 7.2$  Hz, 2 H, ArH), 7.33-7.21 (m, 5 H, ArH), 7.20-7.12 (m, 3 H, ArH), 6.88 (d,  $J = 8.4$  Hz, 2 H, ArH), 6.59-6.47 (m, 1 H, =CH), 4.79 (s, 2 H,  $\text{OCH}_2$ ), 3.75 (dd,  $J_1 = 9.0$  Hz,  $J_2 = 5.8$  Hz, 1 H, CH), 3.64 (s, 3 H,  $\text{OCH}_3$ ), 3.38-3.21 (m, 4 H,  $\text{CH}_3$  and one proton of  $\text{CH}_2$ ), 3.15-3.04 (m, 1 H, one proton of  $\text{CH}_2$ );  **$^{13}\text{C NMR}$**  (100 MHz,  $\text{CDCl}_3$ ):  $\delta$  204.3, 169.2, 168.8, 158.0, 136.6, 135.1, 128.34, 128.26, 128.0, 127.7, 127.1, 125.8, 125.6, 114.9, 107.3, 99.6, 69.6, 52.4, 52.1, 49.9, 28.9; **IR** (neat):  $\nu$  3033, 2951, 2844, 2106, 1939, 1726, 1603, 1239, 1229  $\text{cm}^{-1}$ ; **MS** (70 eV, EI)  $m/z$  (%): 442 ( $\text{M}^+$ , 19.96), 91 (100); **HRMS** (EI) Calcd for  $\text{C}_{28}\text{H}_{26}\text{O}_5$  [ $\text{M}]^+$ : 442.1775, Found: 442.1779.

(9) Dimethyl 2-(2-phenyl-4-(benzo[*d*][1,3]dioxol-5-yl)buta-2,3-dienyl) malonate **4haa** (zzn-1-090)

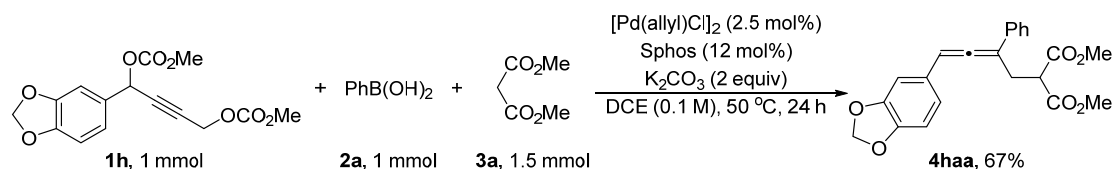

Following the **Typical Procedure III**, the reaction of  $[\text{Pd}(\text{allyl})\text{Cl}]_2$  (9.1 mg, 0.025 mmol), Sphos (49.4 mg, 0.12 mmol), **1g** (322.1 mg, 1 mmol), **2a** (121.8 mg, 1 mmol),  $\text{K}_2\text{CO}_3$  (276.6 mg, 2 mmol), **3a** (171  $\mu\text{L}$ ,  $d = 1.156$ , 197.7 mg, 1.5 mmol) and

DCE (10 mL) afforded **4gaa** (258.9 mg, 67%, purity = 99%) [eluent: petroleum ether / ethyl acetate = 10/1 (880 mL)] as a yellow oil; **<sup>1</sup>H NMR** (400 MHz, CDCl<sub>3</sub>): δ 7.44 (d, *J* = 7.6 Hz, 2 H, ArH), 7.33 (t, *J* = 7.6 Hz, 2 H, ArH), 7.26-7.22 (m, 1 H, ArH), 6.77-6.76 (m, 3 H, ArH), 6.52 (t, *J* = 3.4 Hz, 1 H, =CH), 5.94 (d, *J* = 2.8 Hz, 2 H, CH<sub>2</sub>), 3.73 (m, 4 H, CH and OCH<sub>3</sub>), 3.52 (s, 3 H, OCH<sub>3</sub>), 3.30-3.32 (m, 1 H, one proton of CH<sub>2</sub>), 3.15-3.09 (m, 1 H, one proton of CH<sub>2</sub>); **<sup>13</sup>C NMR** (100 MHz, CDCl<sub>3</sub>): δ 204.6, 169.5, 169.1, 148.1, 147.2, 135.3, 128.6, 127.6, 127.5, 126.0, 121.0, 108.4, 107.8, 106.8, 101.1, 100.1, 52.7, 52.5, 50.2, 29.2; **IR** (neat): ν 3002, 2952, 2895, 2778, 1936, 1731, 1597, 1487, 1439, 1341, 1240 cm<sup>-1</sup>; **MS** (ESI) *m/z* 381.1 [M+H]<sup>+</sup>; **HRMS** (ESI) Calcd for C<sub>22</sub>H<sub>21</sub>O<sub>6</sub> [M+H]<sup>+</sup>: 381.1333, Found: 381.1333.

(10) Dimethyl 2-(2-phenyl-4-(2-fluorophenyl)buta-2,3-dienyl) malonate **4iaa** (zzn-1-016)

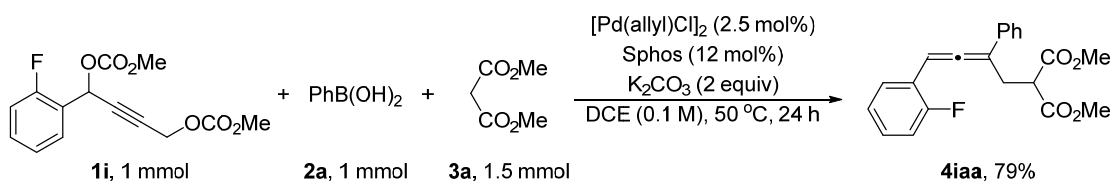

Following the **Typical Procedure III**, the reaction of [Pd(allyl)Cl]<sub>2</sub> (9.1 mg, 0.025 mmol), Sphos (49.5 mg, 0.12 mmol), **1i** (296.0 mg, 1 mmol), **2a** (121.8 mg, 1 mmol), K<sub>2</sub>CO<sub>3</sub> (276.5 mg, 2 mmol), **3a** (171 μL, d = 1.156, 197.7 mg, 1.5 mmol) and DCE (10 mL) afforded **4iaa** (280.4 mg, 79%) [eluent: petroleum ether / ethyl acetate = 60/1 (1280 mL)] as a yellow oil; **<sup>1</sup>H NMR** (400 MHz, CDCl<sub>3</sub>): δ 7.46-7.44 (m, 2 H, ArH), 7.35-7.15 (m, 5 H, ArH), 7.07-7.01 (m, 2 H, ArH), 6.82 (t, *J* = 3.2 Hz, 1 H, =CH), 3.77-3.72 (m, 4 H, CH and OCH<sub>3</sub>), 3.46 (s, 3 H, OCH<sub>3</sub>), 3.31-3.24 (m, 1 H, one proton of CH<sub>2</sub>), 3.17-3.11 (m, 1 H, one proton of CH<sub>2</sub>); **<sup>13</sup>C NMR** (100 MHz, CDCl<sub>3</sub>): δ 205.8 (d, *J* = 2.0 Hz), 169.3, 169.0, 159.6 (d, *J* = 248.2 Hz), 134.8, 128.8 (d, *J* = 8.1 Hz), 128.6, 128.3 (d, *J* = 3.2 Hz), 127.5, 125.9, 124.1 (d, *J* = 3.7 Hz), 121.1 (d, *J* = 12.2 Hz), 115.6 (d, *J* = 21.0 Hz), 107.7, 92.5 (d, *J* = 6.4 Hz), 52.62 (d, *J* = 1.2 Hz), 52.3, 50.0, 29.0; **<sup>19</sup>F NMR** (376 MHz, CDCl<sub>3</sub>): -119.7; **IR** (neat): ν 2953, 2847, 1938, 1732, 1581, 1492, 1435, 1232, 1148 cm<sup>-1</sup>; **MS** (70 eV, EI) *m/z* (%): 354 (M<sup>+</sup>, 11.59),

222 (100); **HRMS** (ESI) Calcd for C<sub>21</sub>H<sub>20</sub>O<sub>4</sub>F [M+H]<sup>+</sup>: 355.1340, Found: 355.1339.

(11) Dimethyl 2-(2-phenyl-4-(3-fluorophenyl)buta-2,3-dienyl) malonate **4jaa** (zzn-1-015)

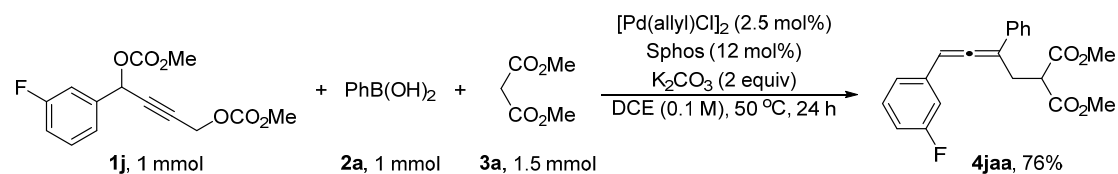

Following the **Typical Procedure III**, the reaction of [Pd(allyl)Cl]<sub>2</sub> (9.1 mg, 0.025 mmol), Sphos (49.2 mg, 0.12 mmol), **1j** (297.0 mg, 1 mmol), **2a** (121.7 mg, 1 mmol), K<sub>2</sub>CO<sub>3</sub> (276.6 mg, 2 mmol), **3a** (171 μL, d = 1.156, 197.7 mg, 1.5 mmol) and DCE (10 mL) afforded **4jaa** (276.6 mg, 76%, purity = 97%) [eluent: petroleum ether / ethyl acetate = 40/1 (1230 mL)] as a yellow oil; **<sup>1</sup>H NMR** (400 MHz, CDCl<sub>3</sub>): δ 7.45-7.43 (m, 2 H, ArH), 7.33 (t, *J* = 7.4 Hz, 2 H, ArH), 7.30-7.21 (m, 2 H, ArH), 7.06 (t, *J* = 7.6 Hz, 1 H, ArH), 6.98 (t, *J* = 10.0 Hz, 1 H, ArH), 6.91 (t, *J* = 8.0 Hz, 1 H, ArH), 6.61-6.47 (m, 1 H, =CH), 3.76-3.72 (m, 4 H, CH and OCH<sub>3</sub>), 3.47 (s, 3 H, OCH<sub>3</sub>), 3.33-3.26 (m, 1 H, one proton of CH<sub>2</sub>), 3.17-3.11 (m, 1 H, one proton of CH<sub>2</sub>); **<sup>13</sup>C NMR** (100 MHz, CDCl<sub>3</sub>): δ 205.5, 169.3, 168.9, 163.1 (d, *J* = 243.6 Hz), 136.1 (d, *J* = 7.6 Hz), 134.7, 130.1 (d, *J* = 8.4 Hz), 128.6, 127.7, 126.0, 122.7 (d, *J* = 3.1 Hz), 114.3 (d, *J* = 21.4 Hz), 113.4 (d, *J* = 22.2 Hz), 108.1, 99.4 (d, *J* = 2.3 Hz), 52.7, 52.4, 50.0, 29.0; **<sup>19</sup>F NMR** (376 MHz, CDCl<sub>3</sub>): -113.6; **IR** (neat): ν 2954, 1938, 1732, 1610, 1585, 1489, 1435, 1150 cm<sup>-1</sup>; **MS** (70 eV, EI) *m/z* (%): 354 (M<sup>+</sup>, 17.25), 222 (100); **HRMS** (ESI) Calcd for C<sub>21</sub>H<sub>20</sub>O<sub>4</sub>F [M+H]<sup>+</sup>: 355.1340, Found: 355.1341.

(12) Compound **4kaa** (zzn-1-067)

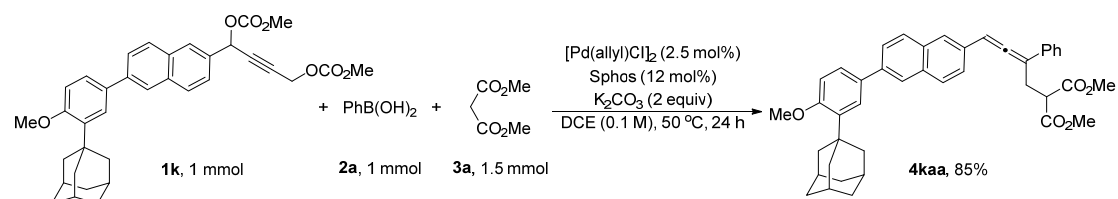

Following the **Typical Procedure III**, the reaction of [Pd(allyl)Cl]<sub>2</sub> (9.2 mg, 0.025 mmol), Sphos (49.4 mg, 0.12 mmol), **1k** (568.1 mg, 1 mmol), **2a** (121.9 mg, 1

mmol), K<sub>2</sub>CO<sub>3</sub> (276.6 mg, 2 mmol), **3a** (171 μL, d = 1.156, 197.7 mg, 1.5 mmol) and DCE (10 mL) afforded **4kaa** (531.2 mg, 85%) [eluent: petroleum ether / ethyl acetate = 25/1 (520 mL) to petroleum ether / ethyl acetate = 18/1 (380 mL) to petroleum ether / ethyl acetate = 12/1 (520 mL)] as a yellow solid (we were not able to obtain the crystal from the solvent tested, the **m.p.** was determined by using the solid after evaporation of the eluent. When the white solid was heated up to 68.5 °C, it shrank. At 78.4 °C, the solid started melting. At 87.1 °C, the sample was completely melted and the color of the liquid was yellow); **<sup>1</sup>H NMR** (400 MHz, CDCl<sub>3</sub>): δ 7.92 (s, 1 H, ArH), 7.83-7.78 (m, 2 H, ArH), 7.72-7.69 (m, 2 H, ArH), 7.58 (d, *J* = 1.6 Hz, 1 H, ArH), 7.55-7.46 (m, 3 H, ArH), 7.41 (d, *J* = 8.4 Hz, 1 H, ArH), 7.35 (t, *J* = 7.6 Hz, 2 H, ArH), 7.27-7.24 (m, 1 H, ArH), 6.97 (d, *J* = 8.4 Hz, 1 H, ArH), 6.84-6.73 (m, 1 H, =CH), 3.89 (s, 3 H, OCH<sub>3</sub>), 3.80 (t, *J* = 6.8 Hz, 1 H, CH), 3.72 (s, 3 H, OCH<sub>3</sub>), 3.37-3.31 (m, 4 H, OCH<sub>3</sub> and one proton of CH<sub>2</sub>), 3.20-3.17 (m, 1 H, one proton of CH<sub>2</sub>), 2.18 (br, 6 H, 3 × CH<sub>2</sub>), 2.09 (br, 3 H, 3 × CH), 1.79 (br, 6 H, 3 × CH<sub>2</sub>); **<sup>13</sup>C NMR** (100 MHz, CDCl<sub>3</sub>): δ 205.7, 169.5, 169.1, 158.5, 138.9, 138.8, 135.2, 133.2, 132.9, 132.4, 130.7, 128.6, 128.5, 128.1, 127.5, 126.05, 126.01, 125.78, 125.76, 125.5, 125.1, 124.8, 112.0, 107.8, 100.8, 55.1, 52.7, 52.5, 50.2, 40.6, 37.13, 37.09, 29.2, 29.1; **IR** (neat): ν 2901, 2848, 1748, 1604, 1495, 1441, 1234 cm<sup>-1</sup>; **MS** (ESI) *m/z* 649.3 [M+Na]<sup>+</sup>; **HRMS** (ESI) Calcd for C<sub>42</sub>H<sub>42</sub>O<sub>5</sub>Na [M+Na]<sup>+</sup>: 649.2924, Found: 649.2933.

(13) Dimethyl 2-(2-phenylundeca-2,3-dienyl) malonate **4laa** (lican-06-038)

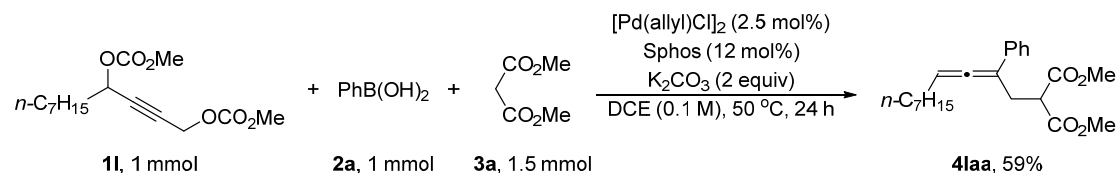

Following the **Typical Procedure III**, the reaction of [Pd(allyl)Cl]<sub>2</sub> (9.1 mg, 0.025 mmol), Sphos (49.4 mg, 0.12 mmol), **11** (301.2 mg, 1 mmol), **2a** (122.3 mg, 1 mmol), K<sub>2</sub>CO<sub>3</sub> (276.4 mg, 2 mmol), **3a** (171 μL, d = 1.156, 197.7 mg, 1.5 mmol) and DCE (10 mL) afforded **4laa** (215.8 mg, 59%, purity = 98%) [eluent: petroleum ether / ethyl acetate = 20/1 (630 mL)] as a yellowish oil: **<sup>1</sup>H NMR** (400 MHz, CDCl<sub>3</sub>): δ

7.38 (d,  $J = 8.0$  Hz, 2 H, ArH), 7.30 (t,  $J = 7.6$  Hz, 2 H, ArH), 7.18 (t,  $J = 7.0$  Hz, 1 H, ArH), 5.59-5.52 (m, 1 H, =CH), 3.75-3.67 (m, 7 H,  $2 \times \text{OCH}_3$  and CH), 3.13-2.96 (m, 2 H, CH<sub>2</sub>), 2.07 (q,  $J = 7.6$  Hz, 2 H, CH<sub>2</sub>), 1.52-1.40 (m, 2 H, CH<sub>2</sub>), 1.40-1.24 (m, 8 H,  $4 \times \text{CH}_2$ ), 0.87 (t,  $J = 6.6$  Hz, 3 H, CH<sub>3</sub>); <sup>13</sup>C NMR (100 MHz, CDCl<sub>3</sub>):  $\delta$  202.4, 169.3, 169.2, 136.2, 128.1, 126.6, 125.6, 103.0, 96.8, 52.3, 50.3, 31.6, 29.1, 28.9, 28.7, 22.4, 13.8; IR (neat):  $\nu$  2953, 2924, 2854, 1949, 1735, 1597, 1494, 1435, 1149 cm<sup>-1</sup>; MS (70 eV, EI)  $m/z$  (%): 358 (M<sup>+</sup>, 3.92), 142 (100); HRMS (FI) Calcd for C<sub>22</sub>H<sub>30</sub>O<sub>4</sub> [M]<sup>+</sup>: 358.2139, Found: 358.2145.

(14) Dimethyl 2-(2-phenyl-4-cyclohexylbuta-2,3-dienyl) malonate **4maa** (zzn-1-079)

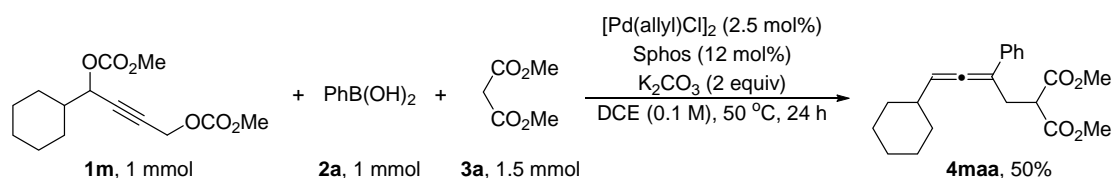

Following the **Typical Procedure III**, the reaction of [Pd(allyl)Cl]<sub>2</sub> (9.1 mg, 0.025 mmol), Sphos (49.2 mg, 0.12 mmol), **1m** (284.2 mg, 1 mmol), **2a** (121.8 mg, 1 mmol), K<sub>2</sub>CO<sub>3</sub> (276.5 mg, 2 mmol), **3a** (171  $\mu$ L,  $d = 1.156$ , 197.7 mg, 1.5 mmol) and DCE (10 mL) afforded **4maa** (172.7 mg, 50%) [eluent: petroleum ether / ethyl acetate = 15/1 (960 mL)] as a yellow oil; <sup>1</sup>H NMR (400 MHz, CDCl<sub>3</sub>):  $\delta$  7.41-7.39 (m, 2 H, ArH), 7.31 (t,  $J = 7.8$  Hz, 2 H, ArH), 7.21-7.18 (m, 1 H, ArH), 5.59-5.50 (m, 1 H, =CH), 3.74-3.39 (m, 7 H, CH and  $2 \times \text{OCH}_3$ ), 3.06-3.04 (m, 2 H, CH<sub>2</sub>), 2.07 (br, 1 H, CH), 1.81-1.64 (m, 5 H), 1.33-1.10 (m, 5 H); <sup>13</sup>C NMR (100 MHz, CDCl<sub>3</sub>):  $\delta$  201.3, 169.49, 169.46, 136.4, 128.3, 126.7, 125.6, 103.9, 103.0, 52.6, 52.5, 50.5, 38.0, 33.0, 32.9, 28.8, 26.01, 26.00, 25.97; IR (neat):  $\nu$  3028, 2923, 2850, 1946, 1753, 1734, 1597, 1494, 1435, 1342, 1265, 1229, 1148 cm<sup>-1</sup>; MS (ESI)  $m/z$  343.2 [M+H]<sup>+</sup>; HRMS (ESI) Calcd for C<sub>21</sub>H<sub>27</sub>O<sub>4</sub> [M+H]<sup>+</sup>: 343.1904, Found: 343.1906.

(15) Dimethyl 2-(2-phenylpentadeca-2,3-dien-12-ynyl) malonate **4naa** (lican-06-056)

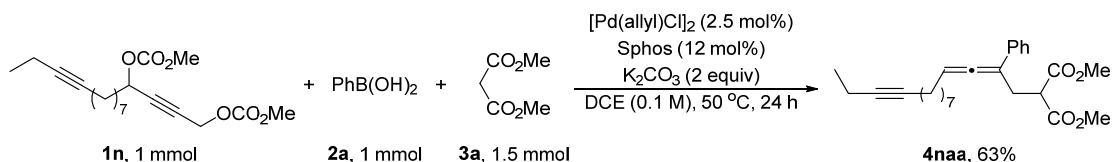

Following the **Typical Procedure III**, the reaction of  $[\text{Pd}(\text{allyl})\text{Cl}]_2$  (9.1 mg, 0.025 mmol), Sphos (49.5 mg, 0.12 mmol), **1n** (353.6 mg, 1 mmol), **2a** (121.9 mg, 1 mmol),  $\text{K}_2\text{CO}_3$  (278.1 mg, 2 mmol), **3a** (171  $\mu\text{L}$ ,  $d = 1.156$ , 197.7 mg, 1.5 mmol) and DCE (10 mL) afforded **4naa** (269.4 mg, 63%, purity = 96%) [eluent: petroleum ether / ethyl acetate = 25/1 (520 mL)] as a colorless oil:  **$^1\text{H NMR}$**  (400 MHz,  $\text{CDCl}_3$ ):  $\delta$  7.38 (d,  $J = 7.6$  Hz, 2 H, ArH), 7.30 (t,  $J = 7.6$  Hz, 2 H, ArH), 7.19 (t,  $J = 7.2$  Hz, 1 H, ArH), 5.63-5.49 (m, 1 H, =CH), 3.81-3.63 (m, 7 H,  $2 \times \text{OCH}_3$  and CH), 3.13-2.95 (m, 2 H,  $\text{CH}_2$ ), 2.21-1.99 (m, 6 H,  $3 \times \text{CH}_2$ ), 1.52-1.40 (m, 4 H,  $2 \times \text{CH}_2$ ), 1.40-1.25 (m, 6 H,  $3 \times \text{CH}_2$ ), 1.10 (t,  $J = 7.2$  Hz, 3 H,  $\text{CH}_3$ );  **$^{13}\text{C NMR}$**  (100 MHz,  $\text{CDCl}_3$ ):  $\delta$  202.5, 169.4, 169.3, 136.2, 128.2, 126.7, 125.6, 103.1, 96.9, 81.5, 79.3, 52.4, 50.4, 29.1, 29.0, 28.94, 28.92, 28.82, 28.78, 28.66, 18.6, 14.2, 12.3; **IR** (neat):  $\nu$  2929, 2854, 1949, 1735, 1435, 1330, 1265, 1150  $\text{cm}^{-1}$ ; **MS** (ESI)  $m/z$  411  $[\text{M}+\text{H}]^+$ ; **HRMS** (DART) Calcd for  $\text{C}_{26}\text{H}_{35}\text{O}_4$   $[\text{M}+\text{H}]^+$ : 411.2530, Found: 411.2526.

(16) Dimethyl 2-(2-(*o*-tolyl)-4-(2-naphthyl)buta-2,3-dienyl) malonate **4aba** (zzn-1-029)

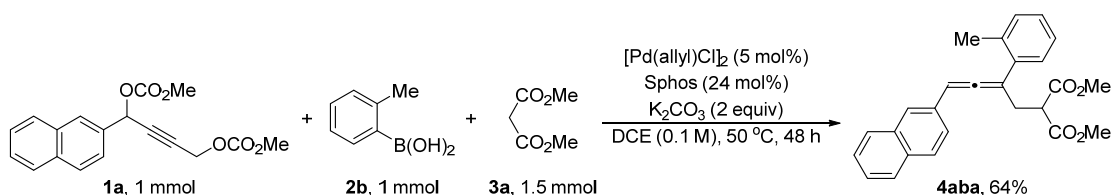

Following the **Typical Procedure III**, the reaction of  $[\text{Pd}(\text{allyl})\text{Cl}]_2$  (18.3 mg, 0.05 mmol), Sphos (98.4 mg, 0.24 mmol), **1a** (328.5 mg, 1 mmol), **2b** (135.8 mg, 1 mmol),  $\text{K}_2\text{CO}_3$  (276.6 mg, 2 mmol), **3a** (229  $\mu\text{L}$ ,  $d = 1.156$ , 264.7 mg, 2 mmol) and DCE (10 mL) afforded **4aba** (256.0 mg, 64%) [eluent: petroleum ether / ethyl acetate = 18/1 (950 mL)] as a yellow oil;  **$^1\text{H NMR}$**  (400 MHz,  $\text{CDCl}_3$ ):  $\delta$  7.63 (d,  $J = 6.8$  Hz, 3 H, ArH), 7.64 (s, 1 H, ArH), 7.46-7.36 (m, 4 H, ArH), 7.22-7.19 (m, 3 H, ArH), 6.56-6.42 (m, 1 H, =CH), 3.76-3.70 (m, 4 H, CH and  $\text{OCH}_3$ ), 3.46 (s, 3 H,  $\text{OCH}_3$ ), 3.23-3.16 (m, 1 H, one proton of  $\text{CH}_2$ ), 3.04-2.98 (m, 1 H, one proton of  $\text{CH}_2$ ), 2.41



(s, 3 H, CH<sub>3</sub>); <sup>13</sup>C NMR (100 MHz, CDCl<sub>3</sub>): δ 203.4, 169.4, 169.2, 136.0, 136.0, 133.5, 132.7, 131.5, 130.6, 128.12, 128.10, 127.7, 127.6, 127.5, 126.2, 126.0, 125.9, 125.7, 124.9, 106.6, 97.6, 52.6, 52.5, 50.1, 32.9, 20.4; IR (neat): ν 3055, 2952, 1943, 1731, 1598, 1508, 1433, 1380, 1148 cm<sup>-1</sup>; MS (ESI) *m/z* 401.2 [M+H]<sup>+</sup>; HRMS (ESI) Calcd for C<sub>26</sub>H<sub>25</sub>O<sub>4</sub> [M+H]<sup>+</sup>: 401.1747, Found: 401.1745.

(17) Dimethyl 2-(2-(*m*-tolyl)-4-(4-cyanophenyl)buta-2,3-dienyl) malonate **4dca** (zzn-1-036)

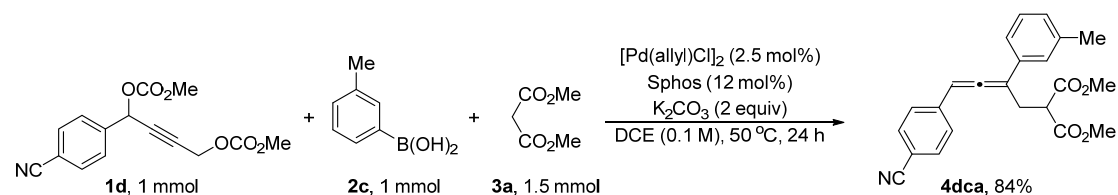

Following the **Typical Procedure III**, the reaction of [Pd(allyl)Cl]<sub>2</sub> (9.1 mg, 0.025 mmol), Sphos (49.3 mg, 0.12 mmol), **1d** (303.3 mg, 1 mmol), **2c** (135.9 mg, 1 mmol), K<sub>2</sub>CO<sub>3</sub> (276.6 mg, 2 mmol), **3a** (171 μL, d = 1.156, 197.7 mg, 1.5 mmol) and DCE (10 mL) afforded **4dca** (315.5 mg, 84%) [eluent: petroleum ether / ethyl acetate = 25/1 (520 mL) to petroleum ether / ethyl acetate = 12/1 (520 mL) to petroleum ether / ethyl acetate = 5/1 (480 mL)] as a yellow oil; <sup>1</sup>H NMR (400 MHz, CDCl<sub>3</sub>): δ 7.60-7.58 (m, 2 H, ArH), 7.38-7.36 (m, 2 H, ArH), 7.26-7.22 (m, 3 H, ArH), 7.16-7.05 (m, 1 H, ArH), 6.64-6.55 (m, 1 H, =CH), 3.73-3.69 (m, 4 H, CH and OCH<sub>3</sub>), 3.44 (s, 3 H, OCH<sub>3</sub>), 3.33-3.26 (m, 1 H, one proton of CH<sub>2</sub>), 3.14-3.10 (m, 1 H, one proton of CH<sub>2</sub>), 2.34 (s, 3 H, CH<sub>3</sub>); <sup>13</sup>C NMR (100 MHz, CDCl<sub>3</sub>): δ 206.8, 169.2, 168.9, 138.9, 138.4, 134.0, 132.4, 128.8, 128.6, 127.4, 126.7, 123.2, 118.9, 110.6, 108.8, 99.1, 52.8, 52.5, 50.0, 29.1, 21.4; IR (neat): ν 3002, 2953, 2226, 1935, 1732, 1602, 1502, 1434, 1381, 1149 cm<sup>-1</sup>; MS (ESI) *m/z* 398.1 [M+Na]<sup>+</sup>; HRMS (ESI) Calcd for C<sub>23</sub>H<sub>21</sub>O<sub>4</sub>NNa [M+Na]<sup>+</sup>: 398.1363, Found: 398.1362.

(18) Dimethyl 2-(2-(3-fluorophenyl)-4-(2-naphthyl)buta-2,3-dienyl) malonate **4ada** (zzn-1-088)

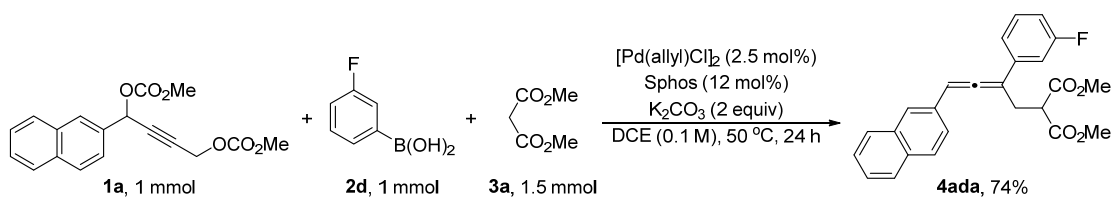

Following the **Typical Procedure III**, the reaction of  $[\text{Pd}(\text{allyl})\text{Cl}]_2$  (9.1 mg, 0.025 mmol), Sphos (49.3 mg, 0.12 mmol), **1a** (328.2 mg, 1 mmol), **2d** (140.1 mg, 1 mmol),  $\text{K}_2\text{CO}_3$  (276.5 mg, 2 mmol), **3a** (171  $\mu\text{L}$ ,  $d = 1.156$ , 197.7 mg, 1.5 mmol) and DCE (10 mL) afforded **4ada** (298.1 mg, 74%) [eluent: petroleum ether / ethyl acetate = 15/1 (960 mL)] as a white solid: **m.p.** 104.9-105.9  $^\circ\text{C}$  (hexane / ethyl acetate);  **$^1\text{H}$  NMR** (400 MHz,  $\text{CDCl}_3$ ):  $\delta$  7.86-7.72 (m, 3 H, ArH), 7.70 (s, 1 H, ArH), 7.52-7.35 (m, 3 H, ArH), 7.34-7.23 (m, 2 H, ArH), 7.18 (d,  $J = 10.2$  Hz, 1 H, ArH), 6.95 (t,  $J = 7.6$  Hz, 1 H, ArH), 6.84-6.74 (m, 1 H, =CH), 3.80-3.73 (m, 4 H, CH and  $\text{OCH}_3$ ), 3.38-3.28 (m, 4 H,  $\text{OCH}_3$  and one proton of  $\text{CH}_2$ ), 3.16-3.11 (m, 1 H, one proton of  $\text{CH}_2$ );  **$^{13}\text{C}$  NMR** (100 MHz,  $\text{CDCl}_3$ ):  $\delta$  205.8, 169.3, 169.0, 163.1 (d,  $J = 244.4$  Hz), 137.7 (d,  $J = 7.7$  Hz), 133.6, 133.0, 130.6, 130.0 (d,  $J = 8.4$  Hz), 128.4, 127.8 (d,  $J = 8.4$  Hz), 126.4, 126.2, 126.0, 124.7, 121.6 (d,  $J = 3.0$  Hz), 114.4 (d,  $J = 20.6$  Hz), 113.0 (d,  $J = 23.0$  Hz), 107.2 (d,  $J = 3.1$  Hz), 101.1, 52.7, 52.5, 50.1, 29.1.;  **$^{19}\text{F}$  NMR** (376 MHz,  $\text{CDCl}_3$ ): -113.4; **IR** (neat):  $\nu$  2969, 1936, 1743, 1726, 1609, 1581, 1485, 1431, 1242  $\text{cm}^{-1}$ ; **MS** (70 eV, EI)  $m/z$  (%): 404 ( $\text{M}^+$ , 10.69), 272 (100); **Elem. Anal.** Calcd. for  $\text{C}_{25}\text{H}_{21}\text{FO}_4$ : C, 74.25; H, 5.23; Found: C, 73.86; H, 5.20.

(19) Dimethyl 2-(2-(3-ethoxycarbonylphenyl)-4-(2-naphthyl)buta-2,3-dienyl) malonate **4aea** (lican-06-009)

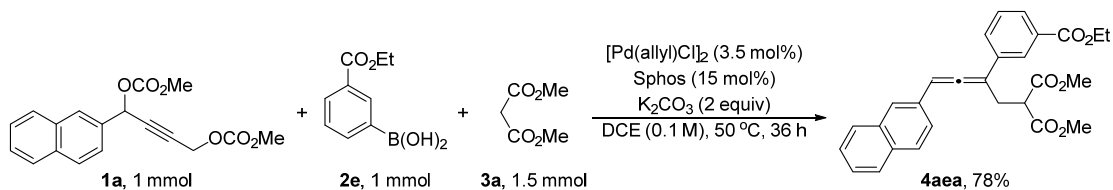

Following the **Typical Procedure III**, the reaction of  $[\text{Pd}(\text{allyl})\text{Cl}]_2$  (12.8 mg, 0.035 mmol), Sphos (61.6 mg, 0.15 mmol), **1a** (328.6 mg, 1 mmol), **2e** (194.5 mg, 1 mmol),  $\text{K}_2\text{CO}_3$  (276.8 mg, 2 mmol), **3a** (171  $\mu\text{L}$ ,  $d = 1.156$ , 197.7 mg, 1.5 mmol) and DCE (10 mL) afforded **4aea** (357.9 mg, 78%) [eluent: petroleum ether / ethyl acetate

= 20/1 (630 mL)] as a white solid: **m.p.** 95.5-97.0 °C (hexane / ethyl acetate); **<sup>1</sup>H NMR** (400 MHz, CDCl<sub>3</sub>): δ 8.15 (s, 1 H, ArH), 7.94 (d, *J* = 8.0 Hz, 1 H, ArH), 7.84-7.73 (m, 3 H, ArH), 7.68 (d, *J* = 10.4 Hz, 2 H, ArH), 7.51-7.33 (m, 4 H, ArH), 6.82 (t, *J* = 3.4 Hz, 1 H, =CH), 4.37 (q, *J* = 7.1 Hz, 2 H, OCH<sub>2</sub>), 3.80 (dd, *J*<sub>1</sub> = 8.8 Hz, *J*<sub>2</sub> = 5.6 Hz, 1 H, CH), 3.73 (s, 3 H, OCH<sub>3</sub>), 3.46-3.29 (m, 4 H, OCH<sub>3</sub> and one proton of CH<sub>2</sub>), 3.25-3.13 (m, 1 H, one proton of CH<sub>2</sub>), 1.36 (t, *J* = 7.2 Hz, 3 H, CH<sub>3</sub>); **<sup>13</sup>C NMR** (100 MHz, CDCl<sub>3</sub>): δ 205.7, 169.3, 168.9, 166.3, 135.6, 133.5, 132.9, 130.9, 130.7, 130.6, 128.6, 128.5, 128.3, 127.7, 127.6, 126.6, 126.3, 126.1, 125.9, 124.6, 107.4, 101.1, 61.0, 52.7, 52.4, 50.0, 29.1, 14.2; **IR** (neat): ν 3064, 2985, 2948, 2909, 2110, 1933, 1715, 1599, 1436, 1280, 1240 cm<sup>-1</sup>; **MS** (70 eV, EI) *m/z* (%): 458 (M<sup>+</sup>, 10.79), 326 (100); **Elem. Anal.** Calcd. for C<sub>28</sub>H<sub>26</sub>O<sub>6</sub>: C, 73.35; H, 5.72, found C, 73.08; H, 5.85.

(20) Dimethyl 2-(2-(4-biphenyl)-4-(2-naphthyl)buta-2,3-dienyl) malonate **4afa** (lican-05-138)

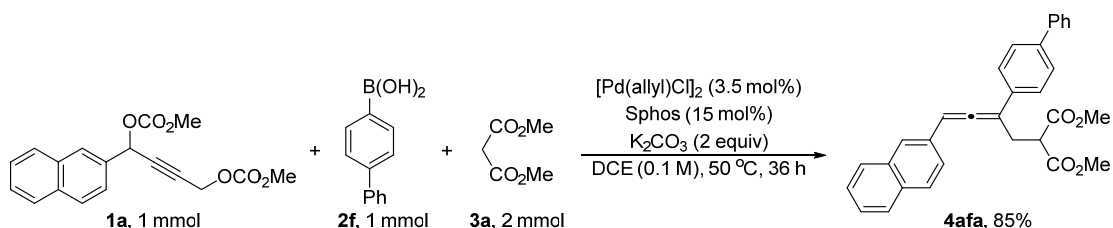

Following the **Typical Procedure III**, the reaction of [Pd(allyl)Cl]<sub>2</sub> (12.9 mg, 0.035 mmol), Sphos (62.0 mg, 0.15 mmol), **1a** (328.5 mg, 1 mmol), **2f** (198.4 mg, 1 mmol), K<sub>2</sub>CO<sub>3</sub> (277.3 mg, 2 mmol), **3a** (229 μL, d = 1.156, 264.7 mg, 2 mmol) and DCE (10 mL) afforded **4afa** (393.2 mg, 85%) [eluent: petroleum ether / ethyl acetate = 10/1 (550 mL)] as a white solid: **m.p.** 154.6-155.1 °C (hexane / ethyl acetate); **<sup>1</sup>H NMR** (400 MHz, CDCl<sub>3</sub>): δ 7.83-7.74 (m, 3 H, ArH), 7.72 (s, 1 H, ArH), 7.64-7.53 (m, 6 H, ArH), 7.50-7.39 (m, 5 H, ArH), 7.33 (t, *J* = 7.4 Hz, 1 H, ArH), 6.81 (t, *J* = 3.2 Hz, 1 H, =CH), 3.82 (dd, *J*<sub>1</sub> = 8.8 Hz, *J*<sub>2</sub> = 6.0 Hz, 1 H, CH), 3.73 (s, 3 H, OCH<sub>3</sub>), 3.45-3.31 (m, 4 H, OCH<sub>3</sub> and one proton of CH<sub>2</sub>), 3.26-3.15 (m, 1 H, one proton of CH<sub>2</sub>); **<sup>13</sup>C NMR** (100 MHz, CDCl<sub>3</sub>): δ 205.9, 169.5, 169.1, 140.5, 140.4, 134.1, 133.6, 132.9, 131.1, 128.8, 128.4, 127.8, 127.7, 127.4, 127.3, 126.9, 126.4, 126.3, 126.1,

125.9, 124.8, 107.6, 100.8, 52.7, 52.5, 50.2, 29.1; **IR** (neat):  $\nu$  3056, 3030, 3002, 2951, 1927, 1748, 1727, 1485, 1435, 1340, 1251, 1149  $\text{cm}^{-1}$ ; **MS** (70 eV, EI)  $m/z$  (%): 462 ( $\text{M}^+$ , 4.07), 330 (100); **Elem. Anal.** Calcd. for  $\text{C}_{31}\text{H}_{26}\text{O}_4$ : C, 80.50; H, 5.67, found C, 80.44; H, 5.68.

(21) Dimethyl 2-(2-(5-benzofuranyl)-4-(2-naphthyl)buta-2,3-dienyl) malonate **4aga** (lican-06-036)

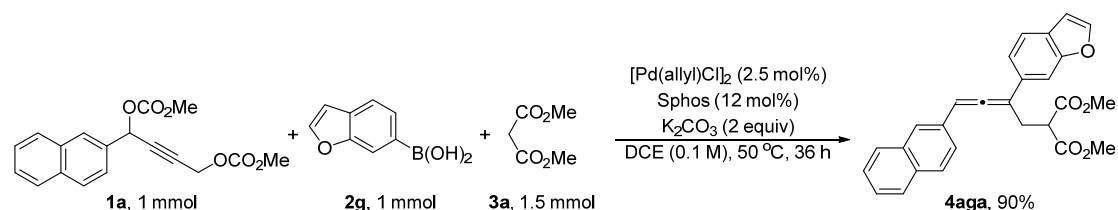

Following the **Typical Procedure III**, the reaction of  $[\text{Pd}(\text{allyl})\text{Cl}]_2$  (9.1 mg, 0.025 mmol), Sphos (49.3 mg, 0.12 mmol), **1a** (328.5 mg, 1 mmol), **2g** (162.4 mg, 1 mmol),  $\text{K}_2\text{CO}_3$  (278.0 mg, 2 mmol), **3a** (171  $\mu\text{L}$ ,  $d = 1.156$ , 197.7 mg, 1.5 mmol) and DCE (10 mL) afforded **4aga** (385.6 mg, 90%) [eluent: petroleum ether / ethyl acetate = 20/1 (840 mL)] as a white solid: **m.p.** 130.6-132.2 °C (hexane);  **$^1\text{H NMR}$**  (400 MHz,  $\text{CDCl}_3$ ):  $\delta$  7.83-7.74 (m, 3 H, ArH), 7.71 (s, 2 H, ArH), 7.60 (s, 1 H, ArH), 7.50-7.38 (m, 5 H, ArH), 6.81-6.76 (m, 1 H, =CH), 6.74 (s, 1 H, ArH), 3.82 (dd, 1 H,  $J_1 = 8.4$  Hz,  $J_2 = 6.0$  Hz, CH), 3.73 (s, 3 H,  $\text{OCH}_3$ ), 3.46-3.32 (m, 4 H,  $\text{OCH}_3$  and one proton of  $\text{CH}_2$ ), 3.28-3.18 (m, 1 H, one proton of  $\text{CH}_2$ );  **$^{13}\text{C NMR}$**  (100 MHz,  $\text{CDCl}_3$ ):  $\delta$  205.5, 169.5, 169.1, 154.4, 145.5, 133.6, 132.8, 131.3, 129.9, 128.3, 127.77, 127.72, 127.65, 126.2, 126.0, 125.8, 124.7, 123.0, 118.3, 111.4, 108.0, 106.6, 100.4, 52.7, 52.4, 50.2, 29.6; **IR** (neat):  $\nu$  3120, 3003, 2952, 2926, 2846, 1933, 1722, 1436, 1284, 1239  $\text{cm}^{-1}$ ; **MS** (70 eV, EI)  $m/z$  (%): 426 ( $\text{M}^+$ , 9.61), 294 (100); **Elem. Anal.** Calcd. for  $\text{C}_{27}\text{H}_{22}\text{O}_5$ : C, 76.04; H, 5.20, found C, 75.90; H, 5.27.

(22) Dimethyl 2-(2-(4-fluorophenyl)-4-(2-naphthyl)buta-2,3-dienyl) malonate **4aha** (zzn-1-089)

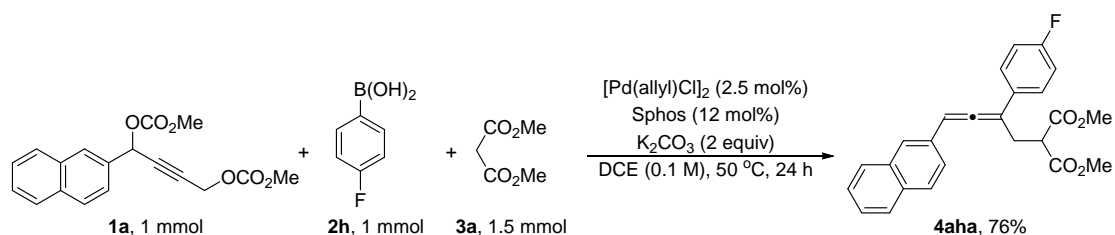

Following the **Typical Procedure III**, the reaction of  $[\text{Pd}(\text{allyl})\text{Cl}]_2$  (9.2 mg, 0.025 mmol), Sphos (49.5 mg, 0.12 mmol), **1a** (328.3 mg, 1 mmol), **2h** (140.1 mg, 1 mmol),  $\text{K}_2\text{CO}_3$  (276.3 mg, 2 mmol), **3a** (171  $\mu\text{L}$ ,  $d = 1.156$ , 197.7 mg, 1.5 mmol) and DCE (10 mL) afforded **4aha** (307.1 mg, 76%) [eluent: petroleum ether / ethyl acetate = 15/1 (960 mL)] as a white solid: **m.p.** 118.7-120.1 °C (hexane / ethyl acetate); **<sup>1</sup>H NMR** (400 MHz,  $\text{CDCl}_3$ ):  $\delta$  7.80-7.75 (m, 3 H, ArH), 7.69 (s, 1 H, ArH), 7.46-7.39 (m, 5 H, ArH), 7.05-7.01 (m, 2 H, ArH), 6.82-6.73 (m, 1 H, =CH), 3.79-3.72 (m, 4 H, CH and  $\text{OCH}_3$ ), 3.37-3.27 (m, 4 H,  $\text{OCH}_3$  and one proton of  $\text{CH}_2$ ), 3.16-3.10 (m, 1 H, one proton of  $\text{CH}_2$ ); **<sup>13</sup>C NMR** (100 MHz,  $\text{CDCl}_3$ ):  $\delta$  205.4 (d,  $J = 1.5$  Hz), 169.4, 169.1, 162.3 (d,  $J = 245.9$  Hz), 133.6, 132.9, 131.1 (d,  $J = 3.0$  Hz), 131.0, 128.4, 127.8 (d,  $J = 6.9$  Hz), 127.7, 127.6, 126.4, 126.1, 125.9, 124.6, 115.6 (d,  $J = 21.5$  Hz), 107.1, 100.9, 52.7, 52.5, 50.1, 29.3.; **<sup>19</sup>F NMR** (376 MHz,  $\text{CDCl}_3$ ): -115.1; **IR** (neat):  $\nu$  2960, 1934, 1725, 1596, 1506, 1438, 1357, 1289  $\text{cm}^{-1}$ ; **MS** (70 eV, EI)  $m/z$  (%): 404 ( $\text{M}^+$ , 10.68), 272 (100); **Elem. Anal.** Calcd. for  $\text{C}_{25}\text{H}_{21}\text{FO}_4$ : C, 74.25; H, 5.23; Found: C, 73.94; H, 5.20.

(23) Dimethyl 2-(2-(4-chlorophenyl)-4-(2-naphthyl)buta-2,3-dienyl) malonate **4aia** (lican-05-093)

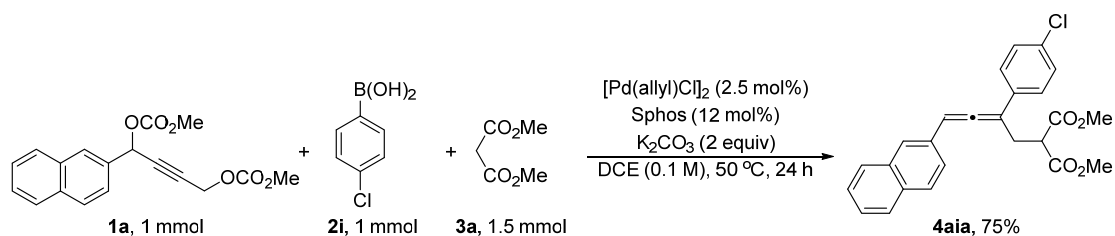

Following the **Typical Procedure III**, the reaction of  $[\text{Pd}(\text{allyl})\text{Cl}]_2$  (9.1 mg, 0.025 mmol), Sphos (49.2 mg, 0.12 mmol), **1a** (328.5 mg, 1 mmol), **2i** (156.9 mg, 1 mmol),  $\text{K}_2\text{CO}_3$  (277.0 mg, 2 mmol), **3a** (171  $\mu\text{L}$ ,  $d = 1.156$ , 197.7 mg, 1.5 mmol) and DCE (10 mL) afforded **4aia** (316.9 mg, 75%) [eluent: petroleum ether / ethyl acetate

= 9/1 (500 mL)] as a white solid: **m.p.** 136.0-137.4 °C (hexane / ethyl acetate); **<sup>1</sup>H NMR** (400 MHz, CDCl<sub>3</sub>): δ 7.85-7.72 (m, 3 H, ArH), 7.68 (s, 1 H, ArH), 7.51-7.34 (m, 5 H, ArH), 7.29 (d, *J* = 8.4 Hz, 2 H, ArH), 6.83-6.73 (m, 1 H, =CH), 3.77 (dd, *J*<sub>1</sub> = 8.6 Hz, *J*<sub>2</sub> = 5.8 Hz, 1 H, CH), 3.72 (s, 3 H, OCH<sub>3</sub>), 3.36 (s, 3 H, OCH<sub>3</sub>), 3.36-3.23 (m, 1 H, one proton of CH<sub>2</sub>), 3.19-3.06 (m, 1 H, one proton of CH<sub>2</sub>); **<sup>13</sup>C NMR** (100 MHz, CDCl<sub>3</sub>): δ 205.6, 169.3, 169.0, 133.7, 133.6, 133.3, 132.9, 130.7, 128.7, 128.4, 127.8, 127.7, 127.2, 126.3, 126.2, 126.0, 124.6, 107.1, 101.0, 52.7, 52.5, 50.0, 29.0; **IR** (neat): ν 3063, 2949, 2924, 2845, 1933, 1725, 1488, 1437, 1329, 1160 cm<sup>-1</sup>; **MS** (ESI) *m/z* 443 [M(<sup>35</sup>Cl)+Na]<sup>+</sup>; **Elem. Anal.** Calcd. for C<sub>25</sub>H<sub>21</sub>ClO<sub>4</sub>: C, 71.34; H, 5.03, found C, 71.60; H, 5.41.

(24) Dimethyl 2-(2-(4-acetoxyphenyl)-4-(2-naphthyl)buta-2,3-dienyl) malonate **4aja** (lican-06-008)

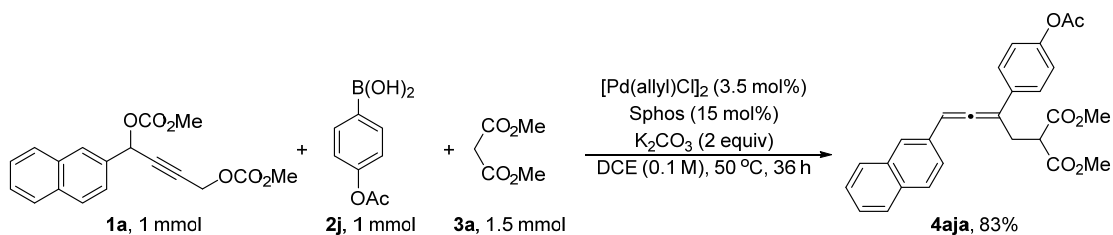

Following the **Typical Procedure III**, the reaction of [Pd(allyl)Cl]<sub>2</sub> (12.9 mg, 0.035 mmol), Sphos (61.8 mg, 0.15 mmol), **1a** (328.7 mg, 1 mmol), **2j** (180.5 mg, 1 mmol), K<sub>2</sub>CO<sub>3</sub> (277.5 mg, 2 mmol), **3a** (171 μL, d = 1.156, 197.7 mg, 1.5 mmol) and DCE (10 mL) afforded **4aja** (370.3 mg, 83%) [eluent: petroleum ether / ethyl acetate = 15/1 (960 mL)] as a yellow solid: **m.p.** 123.2-124.9 °C (hexane / ethyl acetate); **<sup>1</sup>H NMR** (400 MHz, CDCl<sub>3</sub>): δ 7.84-7.72 (m, 3 H, ArH), 7.69 (s, 1 H, ArH), 7.54-7.47 (m, 2 H, ArH), 7.47-7.42 (m, 2 H, ArH), 7.42-7.36 (m, 1 H, ArH), 7.07 (d, *J* = 8.8 Hz, 2 H, ArH), 6.78 (t, *J* = 3.4 Hz, 1 H, =CH), 3.78 (dd, *J*<sub>1</sub> = 8.8 Hz, *J*<sub>2</sub> = 6.0 Hz, 1 H, CH), 3.72 (s, 3 H, OCH<sub>3</sub>), 3.42-3.25 (m, 4 H, OCH<sub>3</sub> and one proton of CH<sub>2</sub>), 3.20-3.08 (m, 1 H, one proton of CH<sub>2</sub>), 2.29 (s, 3 H, CH<sub>3</sub>); **<sup>13</sup>C NMR** (100 MHz, CDCl<sub>3</sub>): δ 205.7, 169.44, 169.41, 169.0, 150.0, 133.6, 132.90, 132.85, 130.9, 128.4, 127.8, 127.7, 127.0, 126.3, 126.1, 125.9, 124.7, 121.8, 107.2, 100.9, 52.7, 52.5, 50.1, 29.2, 21.1; **IR** (neat): ν 3667, 2958, 2903, 2113, 1927, 1749, 1721, 1503, 1431, 1216 cm<sup>-1</sup>; **MS** (70 eV, EI)

$m/z$  (%): 444 ( $M^+$ , 6.85), 270 (100); **Elem. Anal.** Calcd. for  $C_{27}H_{24}O_6$ : C, 72.96; H, 5.44, found C, 72.66; H, 5.66.

(25) Dimethyl 2-(2-(4-(trifluoromethyl)phenyl)-4-(2-naphthyl)buta-2,3-dienyl) malonate **4aka** (lican-06-035)

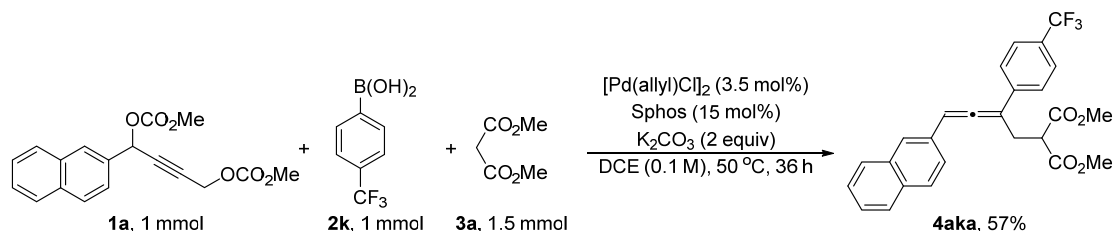

Following the **Typical Procedure III**, the reaction of  $[Pd(allyl)Cl]_2$  (13.0 mg, 0.036 mmol), Sphos (61.6 mg, 0.15 mmol), **1a** (328.5 mg, 1 mmol), **2k** (190.6 mg, 1 mmol),  $K_2CO_3$  (276.0 mg, 2 mmol), **3a** (171  $\mu$ L,  $d = 1.156$ , 197.7 mg, 1.5 mmol) and DCE (10 mL) afforded **4aka** (259.4 mg, 57%) [eluent: petroleum ether / ethyl acetate = 20/1 (840 mL)] as a light brown solid: **m.p.** 94.1-95.8 °C (hexane);  **$^1H$  NMR** (400 MHz,  $CDCl_3$ ):  $\delta$  7.86-7.74 (m, 3 H, ArH), 7.71 (s, 1 H, ArH), 7.59 (s, 4 H, ArH), 7.52-7.42 (m, 2 H, ArH), 7.65 (dd,  $J_1 = 8.4$  Hz,  $J_2 = 1.2$  Hz, 1 H, ArH), 6.84 (t,  $J = 3.4$  Hz, 1 H, =CH), 3.79 (dd,  $J_1 = 8.8$  Hz,  $J_2 = 6.0$  Hz, 1 H, CH), 3.74 (s, 3 H,  $OCH_3$ ), 3.42-3.28 (m, 4 H,  $OCH_3$  and one proton of  $CH_2$ ), 3.16 (ddd,  $J_1 = 15.9$  Hz,  $J_2 = 5.9$  Hz,  $J_3 = 3.9$  Hz, 1 H, one proton of  $CH_2$ );  **$^{13}C$  NMR** (100 MHz,  $CDCl_3$ ):  $\delta$  206.3, 169.3, 168.9, 139.0, 133.6, 133.0, 130.3, 129.4 (q,  $J = 32.2$  Hz), 128.5, 127.8, 127.7, 126.4, 126.3, 126.2, 126.1, 125.5 (q,  $J = 3.8$  Hz), 124.6, 124.1 (q,  $J = 270.4$  Hz), 107.1, 101.2, 52.7, 52.5, 50.0, 29.0;  **$^{19}F$  NMR** (376 MHz,  $CDCl_3$ ): -63.0; **IR** (neat):  $\nu$  3067, 2952, 1928, 1748, 1726, 1612, 1506, 1434, 1413, 1321, 1257, 1123, 1107  $cm^{-1}$ ; **MS** (70 eV, EI)  $m/z$  (%): 454 ( $M^+$ , 13.91), 322 (100); **Elem. Anal.** Calcd. for  $C_{26}H_{21}F_3O_4$ : C, 68.72; H, 4.66, found C, 68.57; H, 4.86.

(26) Compound **4ala** (zzn-1-063)

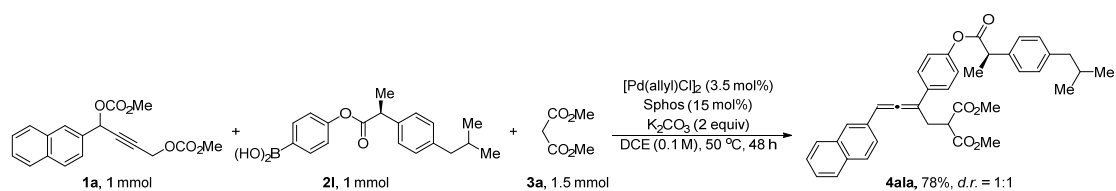

Following the **Typical Procedure III**, the reaction of  $[\text{Pd}(\text{allyl})\text{Cl}]_2$  (12.8 mg, 0.035 mmol), Sphos (61.7 mg, 0.15 mmol), **1a** (328.8 mg, 1 mmol), **2l**<sup>5</sup> (326.1 mg, 1 mmol),  $\text{K}_2\text{CO}_3$  (276.6 mg, 2 mmol), **3a** (171  $\mu\text{L}$ ,  $d = 1.156$ , 197.7 mg, 1.5 mmol) and DCE (10 mL) afforded **4ala** (458.3 mg, 78%,  $d.r. = 1:1$ ) [eluent: petroleum ether / ethyl acetate = 40/1 (820 mL) to petroleum ether / ethyl acetate = 20/1 (840 mL) to petroleum ether / ethyl acetate = 10/1 (440 mL)] (HPLC conditions: Chiralcel OD-H column,  $n$ hexane /  $i$ PrOH = 80/20, 1.0 mL/min,  $\lambda = 214$  nm,  $t_{R1} = 7.5$  min,  $t_{R2} = 9.2$  min) as a white solid: m.p. 62.0-63.3 °C (hexane / ethyl acetate); **<sup>1</sup>H NMR** (400 MHz,  $\text{CDCl}_3$ ):  $\delta$  7.78-7.73 (m, 3 H, ArH), 7.67 (s, 1 H, ArH), 7.46-7.37 (m, 5 H, ArH), 7.28 (d,  $J = 8.0$  Hz, 2 H, ArH), 7.12 (d,  $J = 8.0$  Hz, 2 H, ArH), 6.97 (d,  $J = 8.4$  Hz, 2 H, ArH), 6.75 (t,  $J = 3.4$  Hz, 1 H, =CH), 3.91 (q,  $J = 7.1$  Hz, 1 H, CH), 3.76 (dd,  $J_1 = 5.6$  Hz,  $J_2 = 3.2$  Hz, 1 H, CH), 3.70 (s, 3 H,  $\text{OCH}_3$ ), 3.44-3.25 (m, 4 H, one proton of  $\text{CH}_2$  and  $\text{OCH}_3$ ), 3.15-3.09 (m, 1 H, one proton of  $\text{CH}_2$ ), 2.45 (d,  $J = 7.6$  Hz, 2 H,  $\text{CH}_2$ ), 1.91-1.79 (m, 1 H, CH), 1.58 (d,  $J = 7.2$  Hz, 3 H,  $\text{CH}_3$ ), 0.89 (d,  $J = 6.8$  Hz, 6 H,  $2 \times \text{CH}_3$ ); **<sup>13</sup>C NMR** (100 MHz,  $\text{CDCl}_3$ ):  $\delta$  205.6, 173.1, 169.4, 169.0, 150.2, 140.7, 137.1, 133.6, 132.8, 132.6, 130.9, 129.4, 128.3, 127.73, 127.65, 127.1, 126.9, 126.3, 126.0, 125.9, 124.6, 121.6, 107.2, 100.8, 52.7, 52.4, 50.1, 45.2, 44.9, 30.1, 29.2, 22.3, 18.4; **IR** (neat):  $\nu$  2961, 2870, 1938, 1905, 1743, 1731, 1599, 1505, 1432, 1340, 1264  $\text{cm}^{-1}$ ; **MS** (ESI)  $m/z$  591.3  $[\text{M}+\text{H}]^+$ ; **HRMS** (DART) Calcd for  $\text{C}_{38}\text{H}_{39}\text{O}_6$   $[\text{M}+\text{H}]^+$ : 591.2741, Found: 591.2738. **Elem. Anal.** Calcd. for  $\text{C}_{38}\text{H}_{38}\text{O}_6$ : C, 77.27; H, 6.48; Found: C, 77.54; H, 6.25.

(27) Compound **4ama** (zzn-1-151)

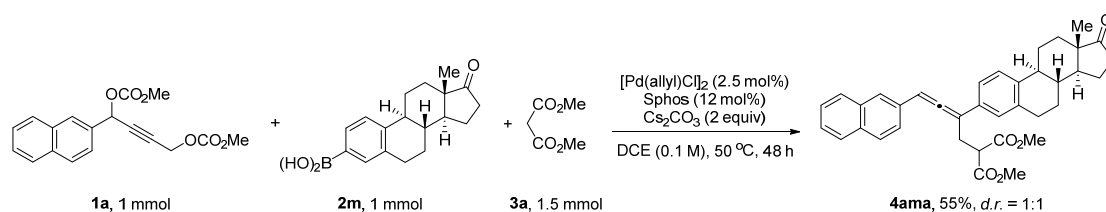



Following the **Typical Procedure III**, the reaction of [Pd(allyl)Cl]<sub>2</sub> (9.1 mg, 0.025 mmol), Sphos (49.4 mg, 0.12 mmol), **1a** (328.2 mg, 1 mmol), **2m**<sup>6</sup> (298.2 mg, 1 mmol), Cs<sub>2</sub>CO<sub>3</sub> (651.3 mg, 2 mmol), **3a** (171 μL, d = 1.156, 197.7 mg, 1.5 mmol) and DCE (10 mL) afforded **4ama** (309.7 mg, 55%, *d.r.* = 1:1) [eluent: petroleum ether / ethyl acetate = 10/1 (1100 mL) to petroleum ether / ethyl acetate = 8/1 (450 mL) to petroleum ether / ethyl acetate = 5/1 (600 mL) to petroleum ether / ethyl acetate = 2/1 (600 mL)] (HPLC conditions: Chiralcel AD-H column, *n*hexane / *i*PrOH = 80/20, 1.0 mL/min, λ = 214 nm, *t*<sub>R1</sub> = 19.7 min, *t*<sub>R2</sub> = 26.3 min) as a yellow solid (we were not able to obtain the crystal from the solvent tested, the **m.p.** was determined by using the solid after evaporation of the eluent. When the white solid was heated up to 63.6 °C, it shrank. At 82.5 °C, the sample was completely melted and the color of the liquid was yellow); <sup>1</sup>H NMR (400 MHz, CDCl<sub>3</sub>): δ 7.88-7.72 (m, 3 H, ArH), 7.69 (s, 1 H, ArH), 7.46-7.39 (m, 3 H, ArH), 7.28-7.22 (m, 3 H, ArH), 6.82-6.70 (m, 1 H, =CH), 3.80-3.73 (m, 4 H), 3.36-3.29 (m, 4 H), 3.15-3.11 (m, 1 H), 3.01-2.82 (m, 2 H), 2.54-2.40 (m, 2 H), 2.33-2.26 (m, 1 H), 2.19-1.95 (m, 4 H), 1.68-1.41 (m, 6 H), 0.90 (s, 3 H); IR (neat): ν 2925, 1932, 1732, 1500, 1434, 1340, 1258, 1149, 1084 cm<sup>-1</sup>; MS (70 eV, EI) *m/z* (%): 562 (M<sup>+</sup>, 1.8), 281 (100); **Elem. Anal.** Calcd. for C<sub>37</sub>H<sub>38</sub>O<sub>5</sub>: C, 78.98; H, 6.81; Found: C, 78.66; H, 7.18.

(28) Dimethyl 2-methyl-2-(2-phenyl-4-(2-naphthyl)buta-2,3-dienyl) malonate **4aab** (lican-06-126)

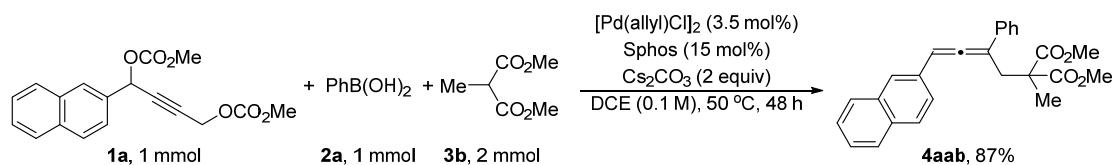

Following the **Typical Procedure III**, the reaction of [Pd(allyl)Cl]<sub>2</sub> (12.9 mg, 0.035 mmol), Sphos (62.3 mg, 0.15 mmol), **1a** (328.3 mg, 1 mmol), **2a** (121.9 mg, 1 mmol), Cs<sub>2</sub>CO<sub>3</sub> (652.7 mg, 2 mmol), **3b** (266 μL, d = 1.098 g/mL, 292.1 mg, 2 mmol) and DCE (10 mL) afforded **4aab** (349.2 mg, 87%) [eluent: petroleum ether / ethyl acetate = 40/1 (410 mL) to petroleum ether / ethyl acetate = 20/1 (630 mL)] as a light

yellow oil: **<sup>1</sup>H NMR** (400 MHz, CDCl<sub>3</sub>): δ 7.75 (d, *J* = 8.4 Hz, 3 H, ArH), 7.69 (s, 1 H, ArH), 7.55-7.45 (m, 3 H, ArH), 7.44-7.34 (m, 2 H, ArH), 7.29 (t, *J* = 7.4 Hz, 2 H, ArH), 7.19 (t, *J* = 7.2 Hz, 1 H, ArH), 6.70-6.60 (m, 1 H, =CH), 3.54 (s, 3 H, OCH<sub>3</sub>), 3.45-3.32 (m, 4 H, OCH<sub>3</sub> and one proton of CH<sub>2</sub>), 3.25 (d, *J* = 15.2 Hz, 1 H, one proton of CH<sub>2</sub>), 1.55 (s, 3 H, CH<sub>3</sub>); **<sup>13</sup>C NMR** (100 MHz, CDCl<sub>3</sub>): δ 207.4, 172.1, 171.7, 136.1, 133.5, 132.7, 131.1, 128.4, 128.2, 127.63, 127.58, 127.3, 126.22, 126.15, 125.9, 125.7, 124.7, 105.3, 98.6, 53.4, 52.4, 52.3, 35.6, 20.0; **IR** (neat): ν 3054, 2997, 2950, 2841, 1934, 1729, 1596, 1493, 1434, 1377, 1242, 1103 cm<sup>-1</sup>; **MS** (ESI) *m/z* 423 [M+Na]<sup>+</sup>; **HRMS** (ESI) Calcd for C<sub>26</sub>H<sub>24</sub>O<sub>4</sub>Na [M+Na]<sup>+</sup>: 423.1567, Found: 423.1570.

(29) Diethyl 2-benzyl-2-(2-phenyl-4-(2-naphthyl)buta-2,3-dienyl) malonate **4aac** (lican-06-119)

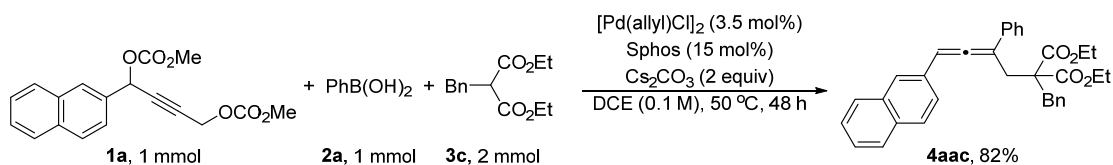

Following the **Typical Procedure III**, the reaction of [Pd(allyl)Cl]<sub>2</sub> (12.8 mg, 0.035 mmol), Sphos (61.6 mg, 0.15 mmol), **1a** (328.6 mg, 1 mmol), **2a** (121.8 mg, 1 mmol), Cs<sub>2</sub>CO<sub>3</sub> (651.4 mg, 2 mmol), **3c** (501.8 mg, 2 mmol) and DCE (10 mL) afforded **4aac** (430.3 mg, 82%, purity = 97%) [eluent: petroleum ether / ethyl acetate = 30/1 (310 mL) to petroleum ether / ethyl acetate = 20/1 (840 mL)] as a yellow oil: **<sup>1</sup>H NMR** (400 MHz, CDCl<sub>3</sub>): δ 7.85-7.66 (m, 4 H, ArH), 7.74 (d, *J* = 8.4 Hz, 1 H, ArH), 7.49 (d, *J* = 7.6 Hz, 2 H, ArH), 7.42-7.30 (m, 2 H, ArH), 7.26 (t, *J* = 7.2 Hz, 2 H, ArH), 7.21-7.03 (m, 6 H, ArH), 6.87-6.69 (m, 1 H, =CH), 4.03 (q, *J* = 6.9 Hz, 2 H, OCH<sub>2</sub>), 3.89-3.77 (m, 1 H, one proton of OCH<sub>2</sub>), 3.76-3.62 (m, 1 H, one proton of OCH<sub>2</sub>), 3.49 (s, 2 H, CH<sub>2</sub>), 3.10 (d, *J* = 16.0 Hz, 1 H, one proton of CH<sub>2</sub>), 3.15 (d, *J* = 16.0 Hz, 1 H, one proton of CH<sub>2</sub>), 1.11 (t, *J* = 7.2 Hz, 3 H, CH<sub>3</sub>), 0.98 (t, *J* = 7.2 Hz, 3 H, CH<sub>3</sub>); **<sup>13</sup>C NMR** (100 MHz, CDCl<sub>3</sub>): δ 207.3, 170.2, 170.0, 136.2, 136.1, 133.5, 132.7, 131.1, 129.9, 128.3, 128.2, 128.0, 127.6, 127.5, 127.2, 126.7, 126.2, 126.1, 126.0, 125.6, 124.6, 105.4, 99.6, 61.1, 58.2, 37.2, 31.2, 13.7, 13.5; **IR** (neat): ν 3059,

3030, 2981, 2252, 1935, 1727, 1597, 1494, 1444, 1283, 1244, 1180  $\text{cm}^{-1}$ ; **MS** (ESI)  $m/z$  505  $[\text{M}+\text{H}]^+$ ; **HRMS** (DART) Calcd for  $\text{C}_{34}\text{H}_{33}\text{O}_4$   $[\text{M}+\text{H}]^+$ : 505.2373, Found: 505.2368.

(30) Dimethyl 2-allyl-2-(2-phenyl-4-(2-naphthyl)buta-2,3-dienyl) malonate **4aad** (lican-06-127)

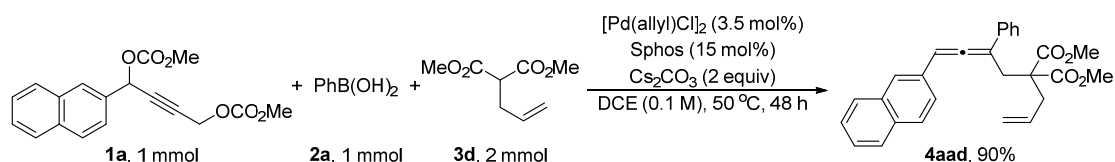

Following the **Typical Procedure III**, the reaction of  $[\text{Pd}(\text{allyl})\text{Cl}]_2$  (12.9 mg, 0.035 mmol), Sphos (62.0 mg, 0.15 mmol), **1a** (328.7 mg, 1 mmol), **2a** (122.4 mg, 1 mmol),  $\text{Cs}_2\text{CO}_3$  (651.9 mg, 2 mmol), **3d** (322  $\mu\text{L}$ ,  $d = 1.071$  g/mL, 344.9 mg, 2 mmol) and DCE (10 mL) afforded **4aad** (382.9 mg, 90%) [eluent: petroleum ether / ethyl acetate = 25/1 (1040 mL)] as a yellowish oil:  **$^1\text{H}$  NMR** (400 MHz,  $\text{CDCl}_3$ ):  $\delta$  7.87-7.75 (m, 3 H, ArH), 7.72 (s, 1 H, ArH), 7.58-7.38 (m, 5 H, ArH), 7.32 (t,  $J = 7.0$  Hz, 2 H, ArH), 7.28-7.17 (m, 1 H, ArH), 6.77-6.58 (m, 1 H, =CH), 5.75-5.54 (m, 1 H, =CH), 5.11-4.89 (m, 2 H, =CH<sub>2</sub>), 3.56 (s, 3 H, OCH<sub>3</sub>), 3.41 (s, 3 H, OCH<sub>3</sub>), 3.33 (d,  $J = 15.2$  Hz, 1 H, one proton of CH<sub>2</sub>), 3.24 (d,  $J = 15.2$  Hz, 1 H, one proton of CH<sub>2</sub>), 2.81 (d,  $J = 6.8$  Hz, 2 H, CH<sub>2</sub>);  **$^{13}\text{C}$  NMR** (100 MHz,  $\text{CDCl}_3$ ):  $\delta$  207.6, 170.9, 170.8, 136.2, 133.6, 132.8, 132.3, 131.2, 128.43, 128.36, 127.73, 127.68, 127.4, 126.5, 126.2, 126.0, 125.8, 124.8, 119.5, 105.2, 98.6, 57.4, 52.4, 52.3, 36.4, 32.3; **IR** (neat):  $\nu$  3056, 2980, 2950, 2841, 1938, 1754, 1731, 1595, 1494, 1437, 1295, 1204  $\text{cm}^{-1}$ ; **MS** (70 eV, EI)  $m/z$  (%): 426 ( $\text{M}^+$ , 54.36), 256 (100); **HRMS** (FI) Calcd for  $\text{C}_{28}\text{H}_{26}\text{O}_4$   $[\text{M}]^+$ : 426.1826, Found: 426.1832.

(31) Diethyl 2-(buta-2,3-dienyl)-2-(2-phenyl-4-(2-naphthyl)buta-2,3-dienyl) malonate **4aae** (lican-06-138)

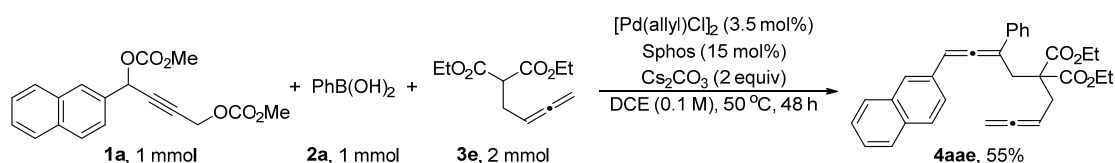

Following the **Typical Procedure III**, the reaction of [Pd(allyl)Cl]<sub>2</sub> (12.8 mg, 0.035 mmol), Sphos (62.0 mg, 0.15 mmol), **1a** (328.5 mg, 1 mmol), **2a** (122.1 mg, 1 mmol), Cs<sub>2</sub>CO<sub>3</sub> (651.0 mg, 2 mmol), **3e** (424.7 mg, 2 mmol) and DCE (10 mL) afforded **4aae** (257.5 mg, 55%) [eluent: petroleum ether / ethyl acetate = 25/1 (520 mL)] as a light green solid: **m.p.** 73.9-74.6 °C (hexane / ethyl acetate); **<sup>1</sup>H NMR** (400 MHz, CDCl<sub>3</sub>): δ 7.84-7.73 (m, 3 H, ArH), 7.70 (s, 1 H, ArH), 7.55-7.46 (m, 3 H, ArH), 7.45-7.38 (m, 2 H, ArH), 7.30 (t, *J* = 7.4 Hz, 2 H, ArH), 7.21 (t, *J* = 7.0 Hz, 1 H, ArH), 6.74-6.57 (m, 1 H, =CH), 4.95 (quint, *J* = 7.1 Hz, 1 H, =CH), 4.60-4.45 (m, 2 H, =CH<sub>2</sub>), 4.09-3.89 (m, 3 H, OCH<sub>2</sub> and one proton of OCH<sub>2</sub>), 3.88-3.77 (m, 1 H, one proton of OCH<sub>2</sub>), 3.41-3.27 (m, 2 H, CH<sub>2</sub>), 2.86-2.72 (m, 2 H, CH<sub>2</sub>), 1.14 (t, *J* = 7.2 Hz, 3 H, OCH<sub>3</sub>), 1.08 (t, *J* = 7.0 Hz, 3 H, OCH<sub>3</sub>); **<sup>13</sup>C NMR** (100 MHz, CDCl<sub>3</sub>): δ 210.0, 207.7, 170.4, 170.3, 136.3, 133.6, 132.8, 131.3, 128.4, 128.3, 127.72, 127.66, 127.3, 126.5, 126.2, 125.9, 125.7, 124.8, 105.2, 98.7, 84.3, 74.5, 61.3, 57.4, 32.0, 31.3, 13.8, 13.7; **IR** (neat): ν 3053, 2987, 2942, 2904, 1949, 1744, 1719, 1595, 1442, 1321, 1275, 1237, 1192, 1065, 1018 cm<sup>-1</sup>; **MS** (70 eV, EI) *m/z* (%): 466 (M<sup>+</sup>, 37.44), 319 (100); **Elem. Anal.** Calcd. for C<sub>31</sub>H<sub>30</sub>O<sub>4</sub>: C, 79.80; H, 6.48, found C, 79.58; H, 6.57.

(32) Diethyl 2-acetamido-2-(2-phenyl-4-(2-naphthyl)buta-2,3-dienyl) malonate **4aaf** (lican-06-135)

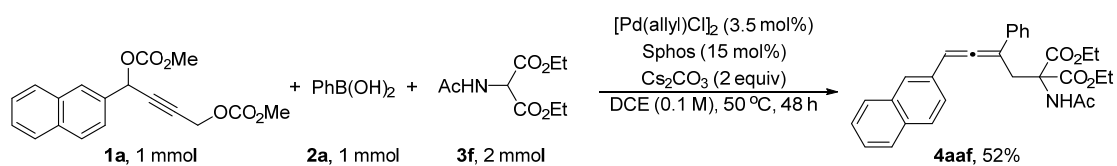

Following the **Typical Procedure III**, the reaction of [Pd(allyl)Cl]<sub>2</sub> (12.8 mg, 0.035 mmol), Sphos (61.6 mg, 0.15 mmol), **1a** (328.6 mg, 1 mmol), **2a** (122.1 mg, 1 mmol), Cs<sub>2</sub>CO<sub>3</sub> (652.7 mg, 2 mmol), **3f** (433.1 mg, 2 mmol) and DCE (10 mL) afforded **4aaf** (247.4 mg, 52%) [eluent: petroleum ether / ethyl acetate = 4/1 (500 mL)] as a light yellow solid: **m.p.** 147.4-147.9 °C (hexane / ethyl acetate); **<sup>1</sup>H NMR** (400 MHz, CDCl<sub>3</sub>): δ 7.82 (d, *J* = 8.0 Hz, 3 H, ArH), 7.74 (s, 1 H, ArH), 7.53 (d, *J* = 8.4 Hz, 1 H, ArH), 7.51-7.39 (m, 4 H, ArH), 7.32 (t, *J* = 7.4 Hz, 2 H, ArH), 7.26-7.19 (m, 1 H, ArH), 6.79-6.70 (m, 1 H, =CH), 6.65 (s, 1 H, NH), 4.22-4.05 (m, 3 H, OCH<sub>2</sub> and one

proton of OCH<sub>2</sub>), 3.97-3.85 (m, 1 H, one proton of OCH<sub>2</sub>), 3.79-3.65 (m, 2 H, CH<sub>2</sub>), 1.50 (s, 3 H, CH<sub>3</sub>), 1.26-1.04 (m, 6 H, 2 × OCH<sub>3</sub>); <sup>13</sup>C NMR (100 MHz, CDCl<sub>3</sub>): δ 208.2, 169.1, 167.5, 167.4, 135.9, 133.6, 132.8, 131.3, 128.51, 128.48, 127.7, 127.4, 126.40, 126.37, 125.89, 125.86, 124.6, 104.8, 98.1, 66.0, 62.5, 32.5, 22.4, 13.8, 13.7; **IR** (neat): ν 3348, 3059, 3019, 2987, 2905, 1933, 1734, 1504, 1443, 1366, 1294, 1279, 1225, 1197, 1088 cm<sup>-1</sup>; **MS** (70 eV, EI) *m/z* (%): 471 (M<sup>+</sup>, 38.72), 429 (100); **Elem. Anal.** Calcd. for C<sub>29</sub>H<sub>29</sub>NO<sub>5</sub>: C, 73.87; H, 6.20; N, 2.97, found C, 73.74; H, 6.14; N, 2.65.

(33) Diethyl 2-fluoro-2-(2-phenyl-4-(4-cyanophenyl)buta-2,3-dienyl) malonate **4dag** (lican-06-164)

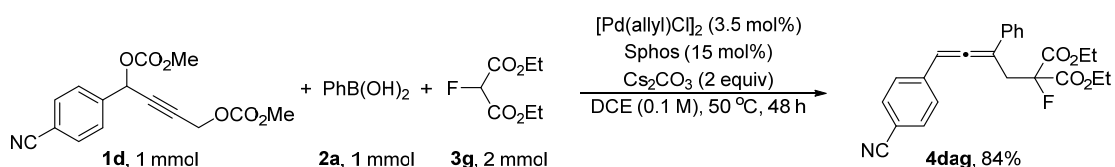

Following the **Typical Procedure III**, the reaction of [Pd(allyl)Cl]<sub>2</sub> (12.8 mg, 0.035 mmol), Sphos (61.6 mg, 0.15 mmol), **1d** (303.8 mg, 1 mmol), **2a** (122.1 mg, 1 mmol), Cs<sub>2</sub>CO<sub>3</sub> (652.7 mg, 2 mmol), **3g** (324 μL, 365.8 mg, d = 1.129 g/mL, 2 mmol) and DCE (10 mL) afforded **4dag** (342.3 mg, 84%) [eluent: petroleum ether / ethyl acetate = 12/1 (1000 mL)] as a light green oil: <sup>1</sup>H NMR (400 MHz, CDCl<sub>3</sub>): δ 7.60 (d, *J* = 7.6 Hz, 2 H, ArH), 7.45 (d, *J* = 8.0 Hz, 2 H, ArH), 7.42-7.30 (m, 4 H, ArH), 7.30-7.22 (m, 1 H, ArH), 6.56 (s, 1 H, =CH), 4.19 (q, *J* = 6.9 Hz, 2 H, OCH<sub>2</sub>), 3.99 (q, *J* = 6.9 Hz, 2 H, OCH<sub>2</sub>), 3.64-3.37 (m, 2 H, CH<sub>2</sub>), 1.23 (t, *J* = 7.2 Hz, 3 H, CH<sub>3</sub>), 1.16 (t, *J* = 7.0 Hz, 3 H, CH<sub>3</sub>); <sup>13</sup>C NMR (100 MHz, CDCl<sub>3</sub>): δ 208.6, 165.4 (d, *J* = 6.1 Hz), 165.2 (d, *J* = 6.1 Hz), 138.5, 134.2, 132.2, 128.4, 127.7, 127.5, 126.1, 118.7, 110.4, 103.4, 97.7, 93.1 (d, *J* = 201.1 Hz), 62.5 (d, *J* = 8.4 Hz), 34.6 (d, *J* = 20.5 Hz), 13.5 (d, *J* = 9.9 Hz); <sup>19</sup>F NMR (376 MHz, CDCl<sub>3</sub>): δ -165.8, **IR** (neat): ν 2983, 2939, 2226, 1936, 1747, 1603, 1495, 1247, 1304, 1076 cm<sup>-1</sup>; **MS** (ESI) *m/z* 425.2 [M+NH<sub>4</sub>]<sup>+</sup>; **HRMS** (DART) Calcd for C<sub>24</sub>H<sub>23</sub>O<sub>4</sub>NF [M+H]<sup>+</sup>: 408.1606, Found: 408.1605.

(34) 5,5-bis(phenylsulfonyl)-3-phenyl-1-(2-naphthyl)penta-1,2-diene **7aaa**  
(lican-06-001)

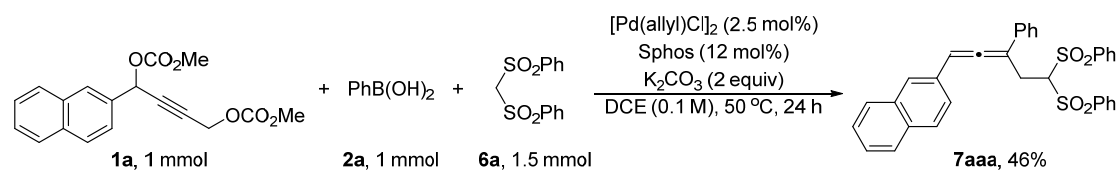

Following the **Typical Procedure III**, the reaction of  $[\text{Pd}(\text{allyl})\text{Cl}]_2$  (9.2 mg, 0.025 mmol), Sphos (49.5 mg, 0.12 mmol), **1a** (328.6 mg, 1 mmol), **2a** (121.9 mg, 1 mmol),  $\text{K}_2\text{CO}_3$  (276.5 mg, 2 mmol), **6a** (444.8 mg, 1.5 mmol) and DCE (10 mL) afforded **7aaa** (252.2 mg, 46%) [eluent: petroleum ether / ethyl acetate = 9/1 (1000 mL) to petroleum ether / ethyl acetate = 4/1 (1000 mL)] as a yellow solid: **m.p.** 158.6-160.7 °C (hexane / ethyl acetate); **<sup>1</sup>H NMR** (400 MHz,  $\text{CDCl}_3$ ):  $\delta$  7.92 (d,  $J = 7.2$  Hz, 2 H, ArH), 7.84-7.68 (m, 6 H, ArH), 7.62 (t,  $J = 7.4$  Hz, 1 H, ArH), 7.53-7.40 (m, 6 H, ArH), 7.39-7.29 (m, 4 H, ArH), 7.28-7.18 (m, 3 H, ArH), 6.71 (t,  $J = 3.2$  Hz, 1 H, =CH), 4.92 (t,  $J = 5.2$  Hz, 1 H, CH), 3.58 (ddd,  $J_1 = 17.5$  Hz,  $J_2 = 4.7$  Hz,  $J_3 = 3.7$  Hz, 1 H, CH), 3.44 (ddd,  $J_1 = 17.5$  Hz,  $J_2 = 5.5$  Hz,  $J_3 = 3.7$  Hz, 1 H, CH); **<sup>13</sup>C NMR** (100 MHz,  $\text{CDCl}_3$ ):  $\delta$  205.6, 138.0, 137.5, 134.6, 134.3, 134.1, 133.5, 133.0, 130.2, 129.5, 129.2, 129.0, 128.9, 128.7, 128.6, 127.9, 127.8, 127.7, 126.44, 126.42, 126.41, 124.7, 107.3, 101.8, 81.1, 25.9; **IR** (neat):  $\nu$  3064, 2973, 2900, 1937, 1626, 1489, 1446, 1316, 1148  $\text{cm}^{-1}$ ; **MS** (70 eV, EI)  $m/z$  (%): 550 ( $\text{M}^+$ , 4.96), 267 (100); **Elem. Anal.** Calcd. for  $\text{C}_{33}\text{H}_{26}\text{O}_4\text{S}_2$ : C, 71.98, H, 4.76; found C, 72.14; H, 4.85.

(35) *N*-(2-phenyl-4-(2-naphthyl)buta-2,3-dienyl) dibenzyl amine **9aaa** (lican-09-013, lican-09-019)

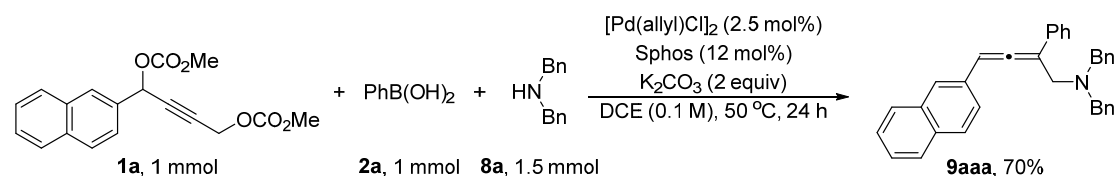

Following the **Typical Procedure III**, the reaction of  $[\text{Pd}(\text{allyl})\text{Cl}]_2$  (9.1 mg, 0.025 mmol), Sphos (49.5 mg, 0.12 mmol), **1a** (328.5 mg, 1 mmol), **2a** (121.6 mg, 1 mmol),  $\text{K}_2\text{CO}_3$  (276.6 mg, 2 mmol), **8a** (288  $\mu\text{L}$ ,  $d = 1.026$ , 295.5 mg, 1.5 mmol) and

DCE (10 mL) afforded **9aaa** (317.3 mg, 70%) [eluent: petroleum ether /dichloromethane = 9/1 (1000 mL)] as a light green oil: **<sup>1</sup>H NMR** (400 MHz, CDCl<sub>3</sub>): δ 7.83-7.69 (m, 4 H, ArH), 7.53-7.36 (m, 5 H, ArH), 7.34-7.16 (m, 13 H, ArH), 6.79-6.69 (m, 1 H, =CH), 3.73 (d, *J* = 13.6 Hz, 2 H, 2 × one proton of CH<sub>2</sub>), 3.68-3.55 (m, 4 H, CH<sub>2</sub> + 2 × one proton of CH<sub>2</sub>); **<sup>13</sup>C NMR** (100 MHz, CDCl<sub>3</sub>): δ 208.5, 139.3, 135.0, 133.7, 132.7, 131.7, 129.1, 128.4, 128.2, 128.1, 127.7, 127.1, 126.90, 126.86, 126.2, 125.8, 125.7, 124.8, 107.9, 97.8, 58.1, 54.5; **IR** (neat): ν 3029, 2920, 2800, 1937, 1598, 1494, 1450, 1365, 1263, 1120, 1073, 1027 cm<sup>-1</sup>; **MS** (ESI) *m/z* 452.2 [M+H]<sup>+</sup>; **HRMS** (ESI) Calcd for C<sub>34</sub>H<sub>30</sub>N [M+H]<sup>+</sup>: 452.2373, Found: 452.2375.

(36) *N*-(2-phenyl-4-(4-chlorophenyl)buta-2,3-dienyl) dibenzyl amine **9caa** (lican-09-021)

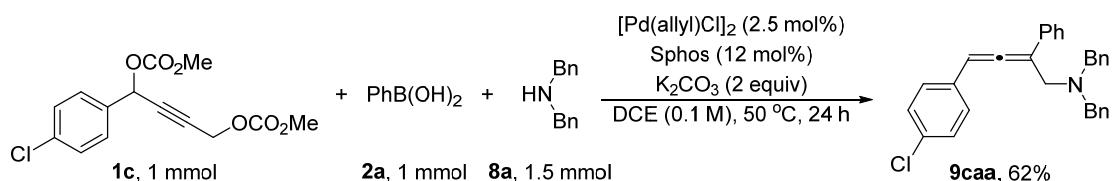

Following the **Typical Procedure III**, the reaction of [Pd(allyl)Cl]<sub>2</sub> (9.0 mg, 0.025 mmol), Sphos (49.3 mg, 0.12 mmol), **1c** (312.9 mg, 1 mmol), **2a** (122.2 mg, 1 mmol), K<sub>2</sub>CO<sub>3</sub> (276.0 mg, 2 mmol), **8a** (288 μL, d = 1.026, 295.5 mg, 1.5 mmol) and DCE (10 mL) afforded **9caa** (271.0 mg, 62%) [eluent: petroleum ether /ethyl ether = 100/1 (1000 mL)] as a colorless oil: **<sup>1</sup>H NMR** (400 MHz, CDCl<sub>3</sub>): δ 7.37-7.30 (m, 2 H, ArH), 7.29-7.12 (m, 17 H, ArH), 6.52-6.49 (m, 1 H, =CH), 3.66 (d, *J* = 13.6 Hz, 2 H, 2 × one proton of CH<sub>2</sub>), 3.68-3.55 (m, 4 H, CH<sub>2</sub> + 2 × one proton of CH<sub>2</sub>); **<sup>13</sup>C NMR** (100 MHz, CDCl<sub>3</sub>): δ 207.9, 139.2, 134.7, 132.72, 132.68, 129.0, 128.8, 128.2, 128.1, 128.0, 127.2, 126.9, 126.8, 108.2, 96.6, 58.1, 54.3; **IR** (neat): ν 3028, 2972, 2901, 2797, 1937, 1599, 1491, 1451, 1367, 1264, 1240, 1091 cm<sup>-1</sup>; **MS** (ESI) *m/z* 436.2 [M(<sup>35</sup>Cl)+H]<sup>+</sup>; **HRMS** (ESI) Calcd for C<sub>30</sub>H<sub>27</sub>N<sup>35</sup>Cl [M(<sup>35</sup>Cl)+H]<sup>+</sup>: 436.1827, Found: 436.1828.

(37) *N*-(2-phenyl-4-(4-cyanophenyl)buta-2,3-dienyl) dibenzyl amine **9daa**  
(lican-09-022)

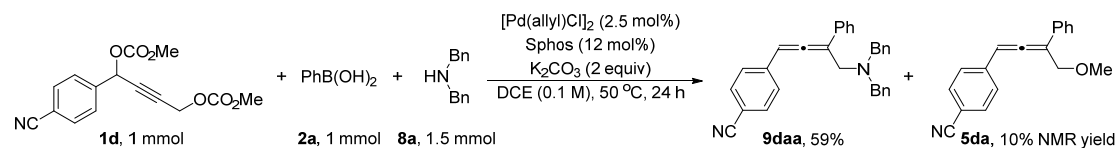

Following the **Typical Procedure III**, the reaction of [Pd(allyl)Cl]<sub>2</sub> (9.1 mg, 0.025 mmol), Sphos (49.3 mg, 0.12 mmol), **1d** (303.6 mg, 1 mmol), **2a** (121.9 mg, 1 mmol), K<sub>2</sub>CO<sub>3</sub> (278.0 mg, 2 mmol), **8a** (288 μL, d = 1.026, 295.5 mg, 1.5 mmol) and DCE (10 mL) afforded **9daa** (253.5 mg, 59%) [eluent: petroleum ether /ethyl ether = 30/1 (900 mL)] as a light green oil: **<sup>1</sup>H NMR** (400 MHz, CDCl<sub>3</sub>): δ 7.49 (d, *J* = 8.4 Hz, 2 H, ArH), 7.37-7.28 (m, 4 H, ArH), 7.28-7.15 (m, 13 H, ArH), 6.56-6.51 (m, 1 H, =CH), 3.66 (d, *J* = 13.2 Hz, 2 H, 2 × one proton of CH<sub>2</sub>), 3.63-3.54 (m, 4 H, CH<sub>2</sub> + 2 × one proton of CH<sub>2</sub>); **<sup>13</sup>C NMR** (100 MHz, CDCl<sub>3</sub>): δ 209.1, 139.3, 138.9, 133.9, 132.4, 128.8, 128.3, 128.1, 127.5, 127.2, 126.9, 126.7, 118.9, 110.2, 108.9, 96.7, 58.1, 54.1; **IR** (neat): ν 2986, 2901, 2798, 2226, 1935, 1603, 1495, 1451, 1367, 1265, 1203, 1176 cm<sup>-1</sup>; **MS** (ESI) *m/z* 427.2 [M+H]<sup>+</sup>; **HRMS** (ESI) Calcd for C<sub>31</sub>H<sub>27</sub>N<sub>2</sub> [M+H]<sup>+</sup>: 427.2169, Found: 427.2168.

(38) *N*-(2-phenyl-4-(4-(benzyloxy)phenyl)buta-2,3-dienyl) dibenzyl amine **9gaa**  
(lican-09-020)

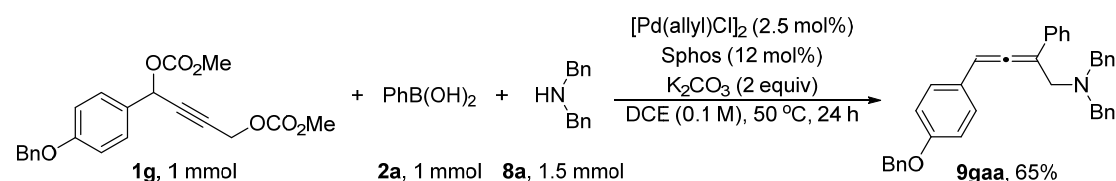

Following the **Typical Procedure III**, the reaction of [Pd(allyl)Cl]<sub>2</sub> (9.0 mg, 0.025 mmol), Sphos (49.5 mg, 0.12 mmol), **1g** (384.4 mg, 1 mmol), **2a** (122.1 mg, 1 mmol), K<sub>2</sub>CO<sub>3</sub> (276.9 mg, 2 mmol), **8a** (288 μL, d = 1.026, 295.5 mg, 1.5 mmol) and DCE (10 mL) afforded **9gaa** (341.6 mg, 65%, purity = 97%) [eluent: petroleum ether /ethyl ether = 60/1 (900 mL)] as a yellowish oil: **<sup>1</sup>H NMR** (400 MHz, CDCl<sub>3</sub>): δ 7.41-7.29 (m, 6 H, ArH), 7.29-7.10 (m, 16 H, ArH), 6.88 (d, *J* = 8.4 Hz, 2 H, ArH), 6.58-6.43 (m, 1 H, =CH), 4.97 (s, 2 H, CH<sub>2</sub>), 3.67 (d, *J* = 13.6 Hz, 2 H, 2 × one proton



of CH<sub>2</sub>), 3.62-3.43 (m, 4 H, CH<sub>2</sub> + 2 × one proton of CH<sub>2</sub>); <sup>13</sup>C NMR (100 MHz, CDCl<sub>3</sub>): δ 207.4, 158.1, 139.3, 136.8, 135.3, 129.1, 128.5, 128.09, 128.05, 128.01, 127.9, 127.4, 126.9, 126.84, 126.79, 126.6, 115.2, 107.5, 96.8, 69.9, 58.0, 54.5; **IR** (neat): ν 3030, 2798, 1605, 1509, 1452, 1374, 1300, 1241, 1171, 1112 cm<sup>-1</sup>; **MS** (ESI) *m/z* 508.3 [M+H]<sup>+</sup>; **HRMS** (ESI) Calcd for C<sub>37</sub>H<sub>34</sub>ON [M+H]<sup>+</sup>: 508.2635, Found: 508.2638.

(39) *N*-(2-phenylundeca-2,3-dienyl) dibenzyl amine **9laa** (lican-09-029)

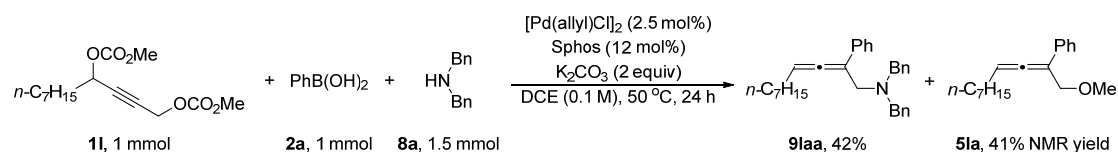

Following the **Typical Procedure III**, the reaction of [Pd(allyl)Cl]<sub>2</sub> (9.1 mg, 0.025 mmol), Sphos (49.3 mg, 0.12 mmol), **11** (300.9 mg, 1 mmol), **2a** (121.9 mg, 1 mmol), K<sub>2</sub>CO<sub>3</sub> (278.1 mg, 2 mmol), **8a** (288 μL, d = 1.026, 295.5 mg, 1.5 mmol) and DCE (10 mL) afforded **9laa** (179.2 mg, 42%) [eluent: petroleum ether / dichloromethane = 9/1 (1000 mL)] as a light green oil: <sup>1</sup>H NMR (400 MHz, CDCl<sub>3</sub>): δ 7.33-7.24 (m, 11 H, ArH), 7.24-7.20 (m, 3 H, ArH), 7.20-7.13 (m, 1 H, ArH), 5.50 (t, *J* = 6.6 Hz, 1 H, =CH), 3.62 (d, *J* = 13.6 Hz, 2 H, 2 × one proton of CH<sub>2</sub>), 3.57 (d, *J* = 13.6 Hz, 2 H, 2 × one proton of CH<sub>2</sub>), 3.49-3.38 (m, 2 H, CH<sub>2</sub>), 2.12 (dd, *J*<sub>1</sub> = 14.2 Hz, *J*<sub>2</sub> = 7.0 Hz, 2 H, CH<sub>2</sub>), 1.52-1.42 (m, 2 H, CH<sub>2</sub>), 1.38-1.17 (m, 8 H, 4 × CH<sub>2</sub>), 0.86 (t, *J* = 6.8 Hz, 3 H, CH<sub>3</sub>); <sup>13</sup>C NMR (100 MHz, CDCl<sub>3</sub>): δ 205.7, 139.5, 136.3, 129.1, 128.0, 127.9, 126.80, 126.76, 126.3, 103.2, 93.5, 57.9, 55.0, 31.8, 29.3, 29.2, 29.1, 29.0, 22.6, 14.1; **IR** (neat): ν 3061, 3027, 2926, 2854, 2794, 1947, 1599, 1494, 1452, 1369, 1242, 1118, 1073 cm<sup>-1</sup>; **MS** (ESI) *m/z* 424.3 [M+H]<sup>+</sup>; **HRMS** (ESI) Calcd for C<sub>31</sub>H<sub>38</sub>N [M+H]<sup>+</sup>: 424.2999, Found: 424.2996.

(40) *N*-(2-phenyl-4-(2-naphthyl)buta-2,3-dienyl) diallylamine **9aab** (lican-09-030)

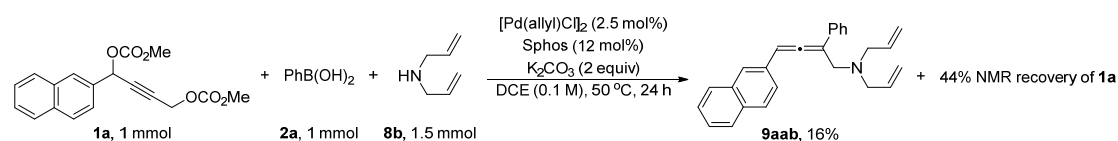

Following the **Typical Procedure III**, the reaction of [Pd(allyl)Cl]<sub>2</sub> (9.0 mg, 0.025 mmol), Sphos (49.5 mg, 0.12 mmol), **1a** (328.6 mg, 1 mmol), **2a** (121.9 mg, 1 mmol), K<sub>2</sub>CO<sub>3</sub> (277.1 mg, 2 mmol), **8b** (185 μL, d = 0.787, 145.7 mg, 1.5 mmol) and DCE (10 mL) afforded **9aab** (60.5 mg, 16%, purity = 96%) [eluent: petroleum ether /ethyl ether = 80/1 (800 mL)] as a light green oil: **<sup>1</sup>H NMR** (400 MHz, CDCl<sub>3</sub>): δ 7.83-7.67 (m, 4 H, ArH), 7.58 (d, *J* = 7.6 Hz, 2 H, ArH), 7.49 (d, *J* = 8.4 Hz, 1 H, ArH), 7.46-7.37 (m, 2 H, ArH), 7.31 (t, *J* = 7.4 Hz, 2 H, ArH), 7.26-7.15 (m, 1 H, ArH), 6.75-6.63 (m, 1 H, =CH), 5.97-5.77 (m, 2 H, 2 × =CH), 5.27-5.02 (m, 4 H, 2 × =CH<sub>2</sub>), 3.67 (dd, *J*<sub>1</sub> = 13.6 Hz, *J*<sub>2</sub> = 2.0 Hz, 1 H, one proton of CH<sub>2</sub>), 3.60 (dd, *J*<sub>1</sub> = 14.0 Hz, *J*<sub>2</sub> = 2.0 Hz, 1 H, one proton of CH<sub>2</sub>), 3.32-3.09 (m, 4 H, 2 × CH<sub>2</sub>); **<sup>13</sup>C NMR** (100 MHz, CDCl<sub>3</sub>): δ 208.5, 135.5, 135.3, 133.7, 132.7, 131.7, 128.4, 127.7, 127.2, 126.7, 126.2, 125.8, 125.7, 124.7, 117.7, 107.5, 97.5, 56.5, 54.1; **IR** (neat): ν 3058, 2920, 2807, 1934, 1639, 1597, 1494, 1446, 1417, 1354, 1264 cm<sup>-1</sup>; **MS** (ESI) *m/z* 352.2 [M+H]<sup>+</sup>; **HRMS** (ESI) Calcd for C<sub>26</sub>H<sub>26</sub>N [M+H]<sup>+</sup>: 352.2060, Found: 352.2053.

### 3 Synthetic Applications

(1) Methyl 6-(4-chlorophenyl)-4-phenylhexa-4,5-dienoate **10** (lican-08-023)

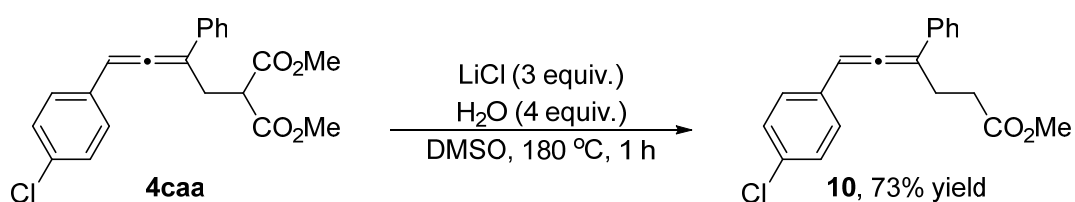

To a flame-dried Schlenk tube were added **4caa** (742.0 mg, 2 mmol) and LiCl (254.4 mg, 6 mmol). After the addition, the Schlenk tube was degassed and refilled with Ar for three times to ensure the complete exclusion of air. Then DMSO (10 mL), and H<sub>2</sub>O (144 μL, d = 1.0 g/mL, 144.0 mg, 8 mmol) were added sequentially under argon atmosphere. The resulting mixture was stirred at 180 °C for 1 h as monitored by TLC. After cooling to room temperature, the crude reaction mixture was quenched with H<sub>2</sub>O (20 mL) and ethyl acetate (20 mL). The aqueous phase was extracted with

ethyl acetate (20 mL × 3). The combined organic layer was washed with brine (40 mL × 3) and dried over anhydrous Na<sub>2</sub>SO<sub>4</sub>. After filtration and evaporation of the solvent, chromatography on silica gel (eluent: petroleum ether / ethyl acetate = 12/1 (650 mL)) afforded **10** (457.2 mg, 73%) as a yellowish solid: **m.p.** 80.0-81.5 °C (hexane); **<sup>1</sup>H NMR** (400 MHz, CDCl<sub>3</sub>): δ 7.44 (d, *J* = 7.6 Hz, 2 H, ArH), 7.33 (t, *J* = 7.6 Hz, 2 H, ArH), 7.30-7.18 (m, 5 H, ArH), 6.55 (t, *J* = 3.4 Hz, 1 H, =CH), 3.54 (s, 3 H, OCH<sub>3</sub>), 3.03-2.91 (m, 1 H, one proton of CH<sub>2</sub>), 2.89-2.78 (m, 1 H, one proton of CH<sub>2</sub>), 2.69-2.54 (m, 2 H, CH<sub>2</sub>); **<sup>13</sup>C NMR** (100 MHz, CDCl<sub>3</sub>): δ 205.8, 173.2, 135.3, 132.9, 132.6, 128.8, 128.6, 128.0, 127.5, 126.0, 109.6, 98.7, 51.6, 32.1, 24.9; **IR** (neat): ν 2989, 2944, 2906, 1938, 1726, 1594, 1489, 1433, 1360, 1228, 1211, 1174, 1151 cm<sup>-1</sup>; **MS** (ESI) *m/z* 313.1 [M(<sup>35</sup>Cl)+H]<sup>+</sup>, 315.0 [M(<sup>37</sup>Cl)+H]<sup>+</sup>; **Elem. Anal.** Calcd. for C<sub>19</sub>H<sub>17</sub>ClO<sub>2</sub>: C, 72.96; H, 5.48, found C, 73.30; H, 5.58.

(2) 6-(4-chlorophenyl)-4-phenylhexa-4,5-dien-1-ol **11** (lican-08-029)

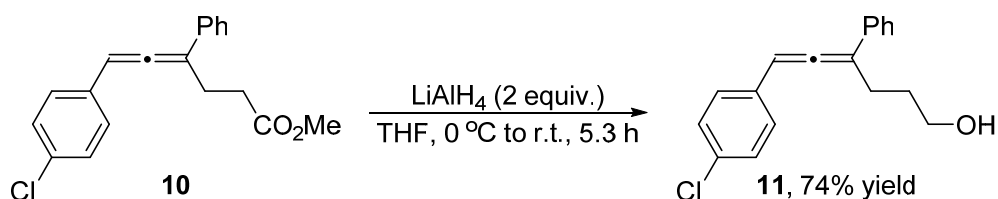

To a flame-dried Schlenk tube were added LiAlH<sub>4</sub> (15.2 mg, 0.4 mmol). After the addition, the Schlenk tube was degassed and refilled with Ar for three times to ensure the complete exclusion of air. Then THF (1 mL) and a solution of **10** (62.8 g, 0.2 mmol) in THF (1 mL) were added dropwise at 0 °C within 20 minutes under argon atmosphere. The resulting mixture was stirred for 5 h while gradually warming up to room temperature as monitored by TLC, quenched with H<sub>2</sub>O (0.5 mL) and ethyl acetate (2 mL), filtered through a short column of silica gel (2 cm) and Na<sub>2</sub>SO<sub>4</sub> (2 cm) eluted with ethyl acetate (10 mL), and concentrated. After filtration and evaporation of the solvent, chromatography on silica gel (eluent: petroleum ether / ethyl acetate = 10/1 (440 mL)) afforded **11** (45.1 mg, 74%, purity = 94%) as a colorless oil: **<sup>1</sup>H NMR** (400 MHz, CDCl<sub>3</sub>): δ 7.44 (d, *J* = 7.6 Hz, 2 H, ArH), 7.33 (t, *J* = 7.8 Hz, 2 H, ArH), 7.30-7.20 (m, 5 H, ArH), 6.52 (t, *J* = 3.2 Hz, 1 H, =CH), 3.74 (t, *J* = 6.2 Hz, 2 H,

OCH<sub>2</sub>), 2.76-2.57 (m, 2 H, CH<sub>2</sub>), 1.96-1.75 (m, 2 H, CH<sub>2</sub>), 1.35 (s, 1 H, OH); <sup>13</sup>C NMR (100 MHz, CDCl<sub>3</sub>): δ 206.3, 135.5, 132.9, 132.6, 128.8, 128.5, 127.8, 127.3, 126.0, 109.9, 97.4, 62.3, 30.8, 26.2; IR (neat): ν 3319, 2936, 1932, 1676, 1595, 1488, 1448, 1419, 1381, 1259 cm<sup>-1</sup>; MS (FI) *m/z* 284 [M(<sup>35</sup>Cl)]<sup>+</sup>; HRMS (FI) Calcd for C<sub>18</sub>H<sub>17</sub>O<sup>35</sup>Cl [M]<sup>+</sup>: 284.0962, Found: 284.0965.

(3) 6-(4-Chlorophenyl)-4-phenylhexa-4,5-dienoic acid **12** (lican-08-021)

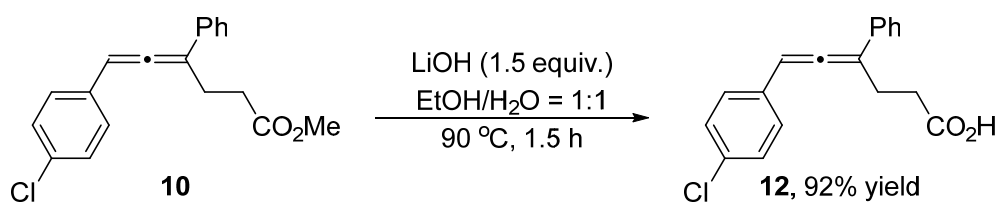

To a flask were added **10** (62.8 mg, 0.2 mmol), EtOH (1 mL), H<sub>2</sub>O (1 mL), and LiOH (7.2 mg, 0.3 mmol) sequentially. After stirring for 1.5 h at 90 °C, the reaction was complete as monitored by TLC. After cooling to room temperature, the crude reaction mixture was quenched with an aqueous solution of hydrochloric acid (aq., 3.0 M, 2 mL) and ethyl acetate (2 mL). The aqueous phase was extracted with ethyl acetate (3 mL × 3). The combined organic layer was washed with brine (5 mL × 3) and dried over anhydrous Na<sub>2</sub>SO<sub>4</sub>. After filtration and evaporation of the solvent, chromatography on silica gel (eluent: petroleum ether / ethyl acetate = 15/1 (480 mL)) afforded **12** (55.1 mg, 92%) as a white solid: **m.p.** 141.6-143.3 °C (hexane / ethyl ether); <sup>1</sup>H NMR (400 MHz, CDCl<sub>3</sub>): δ 7.44 (d, *J* = 7.6 Hz, 2 H, ArH), 7.34 (t, *J* = 7.6 Hz, 2 H, ArH), 7.29-7.16 (m, 5 H, ArH), 6.57 (t, *J* = 3.2 Hz, 1 H, =CH), 3.00-2.88 (m, 1 H, one proton of CH<sub>2</sub>), 2.87-2.75 (m, 1 H, one proton of CH<sub>2</sub>), 2.72-2.56 (m, 2 H, CH<sub>2</sub>); <sup>13</sup>C NMR (100 MHz, CDCl<sub>3</sub>): δ 205.8, 178.7, 135.2, 132.8, 132.5, 128.8, 128.6, 128.0, 127.5, 125.9, 109.4, 99.0, 31.9, 24.6; IR (neat): ν 3100-2880, 2660, 1935, 1693, 1597, 1490, 1428, 1342, 1285, 1259 cm<sup>-1</sup>; MS (ESI) *m/z* 299.1 [M(<sup>35</sup>Cl)+H]<sup>+</sup>; **Elem. Anal.** Calcd. for C<sub>18</sub>H<sub>15</sub>ClO<sub>2</sub>: C, 72.36; H, 5.06, found C, 72.25; H, 5.18.

(4) *N*-methoxy-*N*-methyl-6-(4-chlorophenyl)-4-phenylhexa-4,5-dienamide **13** (lican-08-024)

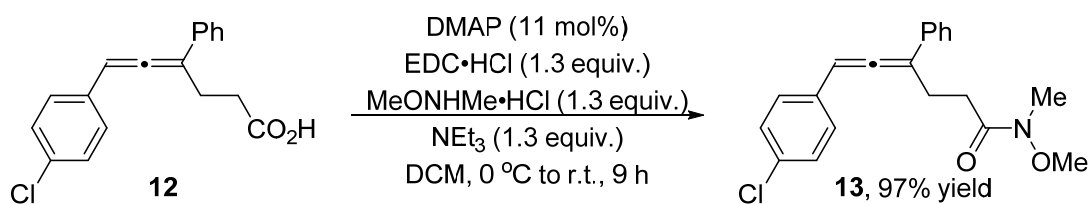

To a flame-dried Schlenk tube were added *N,O*-dimethylhydroxylamine hydrochloride (25.7 mg, 0.26 mmol) and DMAP (2.7 mg, 0.022 mmol). After the addition, the Schlenk tube was degassed and refilled with Ar for three times to ensure the complete exclusion of air. Then DCM (1 mL), **12** (59.8 mg, 0.2 mmol), NEt<sub>3</sub> (36  $\mu$ L, *d* = 0.728 g/mL, 26.2 mg, 0.26 mmol), and EDC·HCl (49.9 mg, 0.26 mmol) were added sequentially at 0 °C under argon atmosphere. The resulting mixture was stirred for 9 h as monitored by TLC while gradually warming up to room temperature. After evaporation of the solvent, chromatography on silica gel (eluent: petroleum ether / ethyl acetate = 4/1 (250 mL)) afforded **13** (66.6 mg, 97%) as a light green oil: **<sup>1</sup>H NMR** (400 MHz, CDCl<sub>3</sub>):  $\delta$  7.51-7.41 (m, 2 H, ArH), 7.36-7.29 (m, 2 H, ArH), 7.28-7.16 (m, 5 H, ArH), 6.53 (t, *J* = 3.4 Hz, 1 H, =CH), 3.54 (s, 3 H, OCH<sub>3</sub>), 3.10-2.93 (m, 4 H, NCH<sub>3</sub> and one proton of CH<sub>2</sub>), 2.90-2.60 (m, 3 H, CH<sub>2</sub> and one proton of CH<sub>2</sub>); **<sup>13</sup>C NMR** (100 MHz, CDCl<sub>3</sub>):  $\delta$  206.0, 173.2 (br), 135.4, 132.8, 132.6, 128.7, 128.5, 128.0, 127.3, 126.0, 110.1, 98.2, 60.9, 32.0 (br), 29.9, 24.4; **IR** (neat):  $\nu$  2967, 2935, 2904, 2245, 1934, 1657, 1596, 1489, 1415, 1383, 1177 cm<sup>-1</sup>; **MS** (ESI) *m/z* 342.1 [M(<sup>35</sup>Cl)+H]<sup>+</sup>, 344.1 [M(<sup>37</sup>Cl)+H]<sup>+</sup>; **HRMS** (ESI) Calcd for C<sub>20</sub>H<sub>21</sub>NO<sub>2</sub><sup>35</sup>Cl [M+H]<sup>+</sup>: 342.1255, Found: 342.1265.

(5) (*E*)-5-(4-chlorostyryl)-5-phenylidihydro-2(3*H*)-furanone (*E*)-**14** (lican-08-027)

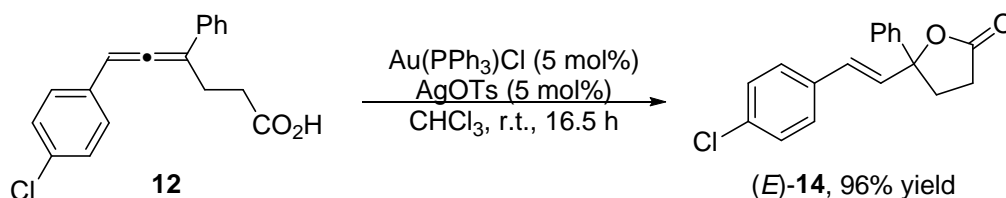

To a flame-dried Schlenk tube were added Au(PPh<sub>3</sub>)Cl (4.9 mg, 0.01 mmol) and AgOTs (2.8 mg, 0.01 mmol). After the addition, the Schlenk tube was degassed and refilled with Ar for three times to ensure the complete exclusion of air. Then CHCl<sub>3</sub> (1.0 mL) was added. After the reaction was stirred at room temperature for 30 min, a

solution of **12** (59.8 g, 0.2 mmol) in CHCl<sub>3</sub> (1.0 mL) was added to the reaction mixture. The resulting mixture was stirred at room temperature for 16 h as monitored by TLC, filtered through a short column of silica gel (1 cm) eluted with ethyl acetate (10 mL), and concentrated. The residue was purified by column chromatography on silica gel (eluent: petroleum ether / ethyl acetate = 5/1 (180 mL)) afforded (*E*)-**14** (57.2 mg, 96%) as a colorless oil: <sup>1</sup>H NMR (400 MHz, CDCl<sub>3</sub>): δ 7.49-7.36 (m, 4 H, ArH), 7.35-7.29 (m, 1 H, ArH), 7.29-7.19 (m, 4 H, ArH), 6.56 (d, *J* = 16.0 Hz, 1 H, =CH), 6.38 (d, *J* = 16.0 Hz, 1 H, =CH), 2.74-2.45 (m, 4 H, 2 × CH<sub>2</sub>); <sup>13</sup>C NMR (100 MHz, CDCl<sub>3</sub>): δ 176.0, 141.5, 134.1, 133.8, 131.5, 128.72, 128.67, 128.2, 128.0, 127.9, 124.9, 88.0, 34.8, 28.5; IR (neat): ν 2987, 2947, 2889, 1892, 1766, 1644, 1592, 1490, 1450, 1406, 1330, 1291, 1224, 1189, 1160 cm<sup>-1</sup>; MS (FI) *m/z* 298 [M(<sup>35</sup>Cl)]<sup>+</sup>; HRMS (FI) Calcd for C<sub>18</sub>H<sub>15</sub>O<sub>2</sub><sup>35</sup>Cl [M]<sup>+</sup>: 298.0755, Found: 298.0759.

#### 4 Mechanistic studies

(1) The reaction of **1a** with 1.0 equiv. of **2a** in the absence of malonate (lican-08-015)

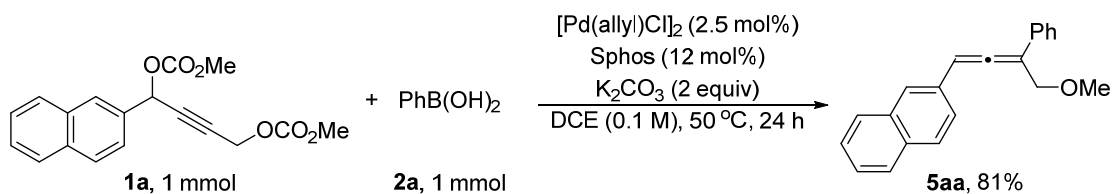

To a flame-dried Schlenk tube were added [Pd(allyl)Cl]<sub>2</sub> (9.1 mg, 0.025 mmol), Sphos (49.5 mg, 0.12 mmol), **1a** (328.5 mg, 1 mmol), **2a** (121.9 mg, 1 mmol), and K<sub>2</sub>CO<sub>3</sub> (277.0 mg, 2 mmol). After the addition, the Schlenk tube was degassed and refilled with Ar for three times to ensure the complete exclusion of air. Then DCE (10 mL) was added under argon atmosphere. The resulting mixture was stirred at 50 °C for 24 h as monitored by TLC, filtered through a short column of silica gel (3 cm) eluted with ethyl acetate (20 mL), and concentrated. The residue was purified by column chromatography on silica gel to afford **5aa** (230.6 mg, 81%) [eluent: petroleum ether / ethyl ether = 30/1 (930 mL)] as a light green solid: **m.p.** 64.7-65.8 °C (hexane); <sup>1</sup>H NMR (400 MHz, CDCl<sub>3</sub>): δ 7.86-7.67 (m, 4 H, ArH), 7.56 (d, *J* = 7.2

Hz, 2 H, ArH), 7.51 (dd,  $J_1 = 8.6$  Hz,  $J_2 = 1.4$  Hz, 1 H, ArH), 7.49-7.40 (m, 2 H, ArH), 7.35 (t,  $J = 7.6$  Hz, 2 H, ArH), 7.29-7.22 (m, 1 H, ArH), 6.83-6.75 (m, 1 H, =CH), 4.56 (ddd,  $J_1 = 17.4$  Hz,  $J_2 = 11.8$  Hz,  $J_3 = 1.8$  Hz, 2 H, CH<sub>2</sub>), 3.44 (s, 3 H, OCH<sub>3</sub>); **<sup>13</sup>C NMR** (100 MHz, CDCl<sub>3</sub>): δ 207.8, 133.9, 133.6, 132.7, 131.0, 128.5, 128.3, 127.59, 127.56, 127.3, 126.3, 126.2, 125.9, 125.7, 124.5, 106.5, 97.8, 71.7, 57.5; **IR** (neat): ν 3025, 2984, 2916, 2880, 2856, 2814, 2120, 1929, 1754, 1493, 1453, 1188, 1093 cm<sup>-1</sup>; **MS** (70 eV, EI)  $m/z$  (%): 286 (M<sup>+</sup>, 6.13), 241 (100); **Elem. Anal.** Calcd. for C<sub>21</sub>H<sub>18</sub>O: C, 88.08; H, 6.34, found C, 87.87; H, 6.32.

(2) The reaction of **1a** with 2.0 equiv. of **2a** under standard conditions (lican-09-027)

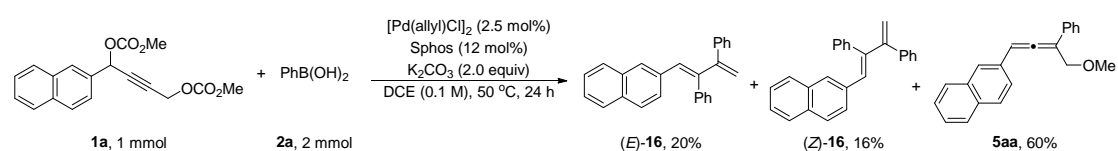

To a flame-dried Schlenk tube were added [Pd(allyl)Cl]<sub>2</sub> (9.0 mg, 0.025 mmol), Sphos (49.5 mg, 0.12 mmol), **1a** (328.5 mg, 1 mmol), **2a** (243.6 mg, 2 mmol), and K<sub>2</sub>CO<sub>3</sub> (276.9 mg, 2 mmol). After the addition, the Schlenk tube was degassed and refilled with Ar for three times to ensure the complete exclusion of air. Then DCE (10 mL) was added under argon atmosphere. The resulting mixture was stirred at 50 °C for 24 h as monitored by TLC, filtered through a short column of silica gel (3 cm) eluted with ethyl acetate (25 mL), and concentrated. The residue was purified by column chromatography on silica gel to afford **(E)-16** (66.9 mg, 20%), **(Z)-16** (52.8 mg, 16%, purity = 98%) [eluent: petroleum ether (1200 mL)] and **5aa** (171.1 mg, 60%) [eluent: petroleum ether / ethyl ether = 30/1 (600 mL)]. The configurations of **(E)-16** and **(Z)-16** were determined by comparing <sup>1</sup>H-NMR data with the previous literature,<sup>7-8</sup> and by comparing the calculated δ value with the measured δ value of the alkenyl proton according to Shoolery's rule.<sup>9</sup>

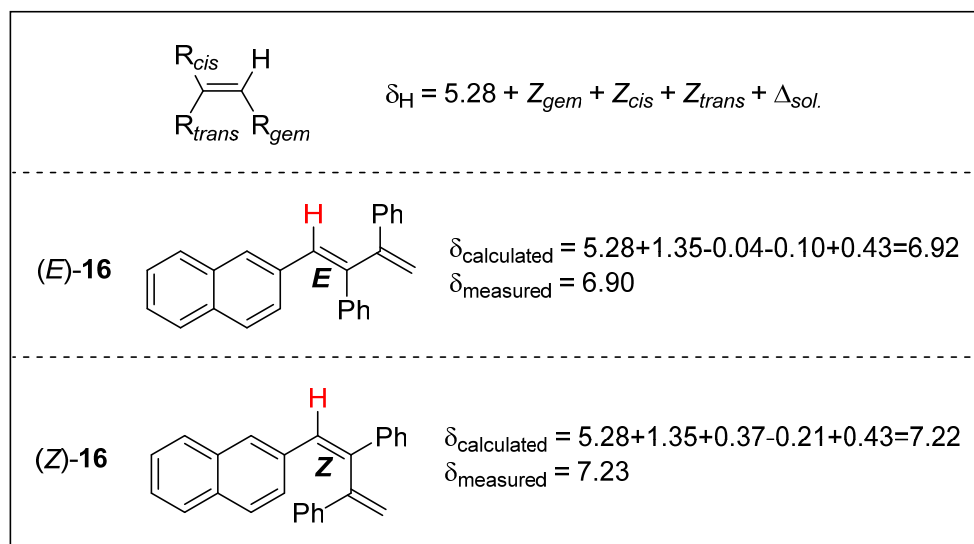

(E)-16: colorless oil;  $^1\text{H NMR}$  (400 MHz,  $\text{CDCl}_3$ ):  $\delta$  7.66-7.60 (m, 1 H, ArH), 7.55-7.50 (m, 1 H, ArH), 7.49-7.42 (m, 3 H, ArH), 7.40-7.22 (m, 11 H, ArH), 6.90 (dd,  $J_1 = 8.6$  Hz,  $J_2 = 1.8$  Hz, 1 H, =CH), 6.70 (s, 1 H, ArH), 5.33 (d,  $J = 1.6$  Hz, 1 H, =CH), 5.09 (d,  $J = 1.2$  Hz, 1 H, =CH);  $^{13}\text{C NMR}$  (100 MHz,  $\text{CDCl}_3$ ):  $\delta$  152.7, 143.4, 141.5, 139.6, 134.6, 133.1, 132.2, 131.2, 130.2, 129.1, 128.8, 128.6, 128.1, 127.9, 127.40, 127.37, 127.32, 127.1, 127.0, 125.85, 125.83, 118.0; **IR** (neat):  $\nu$  2924, 1832, 1577, 1498, 1443, 1382, 1273, 1121, 1073  $\text{cm}^{-1}$ ; **MS** (70 eV, EI)  $m/z$  (%): 332 ( $\text{M}^+$ , 100); **HRMS** (EI) Calcd for  $\text{C}_{26}\text{H}_{20}$  [ $\text{M}$ ] $^+$ : 332.1560, Found: 332.1564.

(Z)-16: colorless oil;  $^1\text{H NMR}$  (400 MHz,  $\text{CDCl}_3$ ):  $\delta$  6.87 (s, 1 H, ArH), 7.76-7.68 (m, 2 H, ArH), 7.67-7.60 (m, 2 H, ArH), 7.59-7.53 (m, 4 H, ArH), 7.44-7.36 (m, 2 H, ArH), 7.34-7.18 (m, 7 H, ArH), 5.92 (s, 1 H, =CH), 5.33 (s, 1 H, =CH);  $^{13}\text{C NMR}$  (100 MHz,  $\text{CDCl}_3$ ):  $\delta$  146.3, 142.3, 141.4, 138.8, 134.9, 133.3, 132.5, 129.6, 128.7, 128.6, 128.4, 128.0, 127.9, 127.6, 127.5, 127.3, 126.7, 126.5, 125.9, 125.8, 117.2; **IR** (neat):  $\nu$  3055, 3023, 2988, 1598, 1572, 1493, 1444, 1406, 1270, 1191, 1125, 1075  $\text{cm}^{-1}$ ; **MS** (70 eV, EI)  $m/z$  (%): 332 ( $\text{M}^+$ , 100); **HRMS** (EI) Calcd for  $\text{C}_{26}\text{H}_{20}$  [ $\text{M}$ ] $^+$ : 332.1560, Found: 332.1563.

(3) The reaction of **1a** with 2.0 equiv. of **2a** and **3a** under standard conditions (lican-08-195)



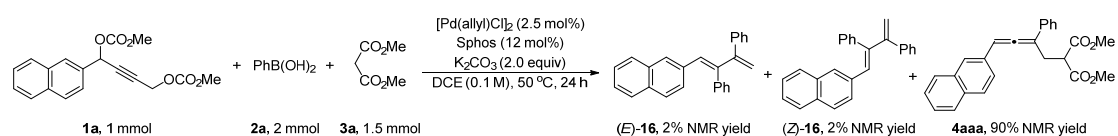

To a flame-dried Schlenk tube were added  $[\text{Pd(allyl)Cl}]_2$  (9.1 mg, 0.025 mmol), Sphos (49.4 mg, 0.12 mmol), **1a** (328.5 mg, 1 mmol), **2a** (243.6 mg, 2 mmol), and  $\text{K}_2\text{CO}_3$  (278.0 mg, 2 mmol). After the addition, the Schlenk tube was degassed and refilled with Ar for three times to ensure the complete exclusion of air. Then DCE (5 mL), **3a** (171  $\mu\text{L}$ ,  $d = 1.156 \text{ g/mL}$ , 197.7 mg, 1.5 mmol) and DCE (5 mL) was added under argon atmosphere. The resulting mixture was stirred at 50  $^\circ\text{C}$  for 24 h as monitored by TLC, filtered through a short column of silica gel (2 cm) eluted with ethyl acetate (25 mL), and concentrated. 2% NMR yield of (E)-**16**, 2% NMR yield of (Z)-**16** and 90% NMR yield of **4aaa** was formed as determined by the  $^1\text{H}$  NMR analysis with  $\text{CH}_2\text{Br}_2$  as the internal standard.

(4) The reaction of **1a** with **2a** for 3 h (lican-08-200)

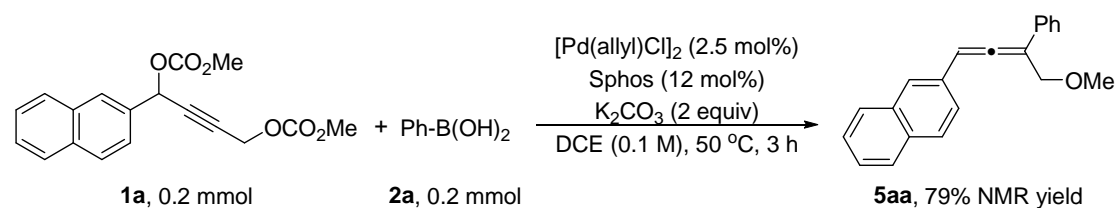

To a flame-dried Schlenk tube were added  $[\text{Pd(allyl)Cl}]_2$  (1.9 mg, 0.005 mmol), Sphos (9.8 mg, 0.024 mmol), **1a** (65.8 mg, 0.2 mmol), **2a** (24.4 mg, 0.2 mmol), and  $\text{K}_2\text{CO}_3$  (55.5 mg, 0.4 mmol). After the addition, the Schlenk tube was degassed and refilled with Ar for three times to ensure the complete exclusion of air. Then DCE (2 mL) was added under argon atmosphere. The resulting mixture was stirred at 50  $^\circ\text{C}$  for 3 h, filtered through a short column of silica gel (1 cm) eluted with ethyl acetate (10 mL), and concentrated. 79% NMR yield of **5aa** was formed as determined by the  $^1\text{H}$  NMR analysis with  $\text{CH}_2\text{Br}_2$  as the internal standard.

(5) The reaction of **1a** with **2a** for 3 h followed by the addition of **3a** (lican-07-173)



Following the **Typical Procedure III**, the reaction of  $[\text{Pd}(\text{allyl})\text{Cl}]_2$  (1.8 mg, 0.005 mmol), Sphos (9.8 mg, 0.024 mmol), **5aa** (57.3 mg, 0.2 mmol),  $\text{K}_2\text{CO}_3$  (55.9 mg, 0.4 mmol), and **3a** (34  $\mu\text{L}$ ,  $d = 1.156 \text{ g/mL}$ , 39.3 mg, 0.3 mmol) in DCE (2 mL) failed to afford product **4aaa** and 96% of **5aa** was recovered as determined by the  $^1\text{H}$  NMR analysis with  $\text{CH}_2\text{Br}_2$  as the internal standard.

(8) Preparation and reaction of methyl 4-(2-naphthyl)-2-phenylbuta-2,3-dienyl carbonate **15**<sup>1</sup> (lican-07-193, lican-08-004 and lican-08-007)

### 8.1 Preparation of compound **15**<sup>1</sup>

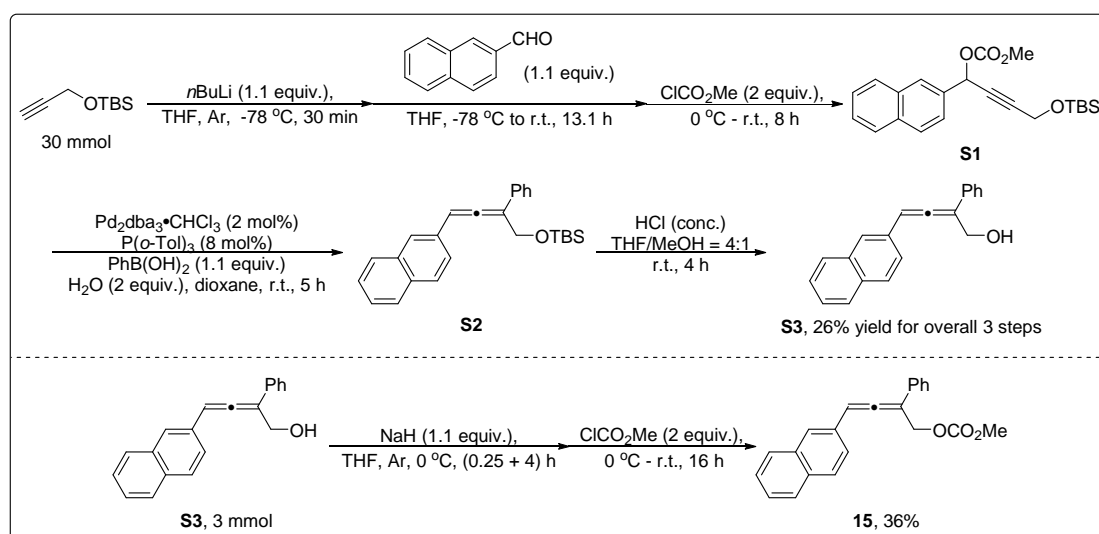

**Step I:** To a solution of *t*-butyldimethylsilyl propargyl ether (6.1 mL,  $d = 0.84 \text{ g/mL}$ , 5.1096 g, 30 mmol) in THF (60 mL) was added dropwise  $n\text{BuLi}$  (2.5 M in hexane, 13.2 mL, 33 mmol) at  $-78\text{ }^\circ\text{C}$  within 30 minutes. Then a solution of 2-naphthaldehyde (5.1633 g, 33 mmol) in THF (40 mL) was added dropwise at  $-78\text{ }^\circ\text{C}$  within 10 minutes. The resulting mixture was stirred for 13 h while gradually warming up to room temperature. The resulting mixture was cooled down to  $0\text{ }^\circ\text{C}$  again and methyl chloroformate (4.6 mL,  $d = 1.22 \text{ g/mL}$ , 5.6120 g, 59 mmol) was added. The resulting mixture was warmed up to room temperature gradually and stirred at rt for 8 h. After the reaction was complete as monitored by TLC (eluent: petroleum ether / ethyl ether = 50/1), it was quenched with  $\text{H}_2\text{O}$  (50 mL) and ethyl ether (50 mL). The aqueous phase was extracted with ethyl ether (30 mL  $\times$  3). The combined organic extract was washed with brine (50 mL  $\times$  3) and dried over

anhydrous Na<sub>2</sub>SO<sub>4</sub>. After filtration and evaporation, the residue was purified by chromatography on silica gel to afford crude product **S1** (eluent: petroleum ether / ethyl ether = 50/1) as an oil, which was used in the next step without further purification.

**Step II:**<sup>1</sup> To an oven-dried three-neck flask were added Pd<sub>2</sub>(dba)<sub>3</sub>·CHCl<sub>3</sub> (622.4 mg, 0.6 mmol), tri(*o*-tolyl)phosphine (728.5 mg, 2.4 mmol), and PhB(OH)<sub>2</sub> (4.0249 g, 33 mmol). After replacing air with argon for three times at rt by using a vacuum line, dioxane (30 mL), H<sub>2</sub>O (1080 μL, 60 mmol), and the crude product **S1**/dioxane (30 mL) were added sequentially. The resulting mixture was stirred for 5 h at room temperature and then filtered through a short pad of silica gel (5 cm) with ethyl acetate (30 mL) as the eluent. After evaporation, the residue was purified by flash chromatography on silica gel to afford crude product **S2** (eluent: petroleum ether (b.p. 60~90 °C)/ethyl ether = 50/1, 1020 mL) as a yellow oil, which was used in the next step without further purification.

**Step III:** To a round-bottomed flask were added the crude product **S2**, 100 mL of the mixed solvent (V<sub>MeOH</sub>/V<sub>DCM</sub> = 1/4), and HCl (conc., 1 mL) sequentially. The resulting mixture was stirred at room temperature for 4 h, quenched with a saturated aqueous solution of NaHCO<sub>3</sub> (50 mL), and extracted with ethyl acetate (50 mL × 3). The combined organic extract was washed with brine (50 mL × 3) and dried over anhydrous Na<sub>2</sub>SO<sub>4</sub>. After filtration and evaporation, the residue was purified by recrystallization (petroleum ether / ethyl acetate) to afford 4-(2-naphthyl)-2-phenylbuta-2,3-dienol **S3** (2.1605 g, 26% yield for overall 3 steps) as a light brown solid: **m.p.** 139.2-140.6 °C (hexane / ethyl acetate); **<sup>1</sup>H NMR** (400 MHz, CDCl<sub>3</sub>): δ 7.88-7.68 (m, 4 H, ArH), 7.57-7.41 (m, 5 H, ArH), 7.36 (t, *J* = 7.8 Hz, 2 H, ArH), 7.27 (t, *J* = 7.8 Hz, 1 H, ArH), 6.89 (t, *J* = 2.2 Hz, 1 H, =CH), 4.83-4.66 (m, 2 H, OCH<sub>2</sub>), 1.78 (t, *J* = 6.4 Hz, 1 H, OH); **<sup>13</sup>C NMR** (100 MHz, CDCl<sub>3</sub>): δ 205.6, 133.7, 133.6, 132.9, 130.9, 128.8, 128.5, 127.78, 127.75, 127.69, 126.4, 126.3, 126.1, 126.0, 124.6, 111.0, 100.5, 61.6; **IR** (neat): ν 3417, 3050, 2859, 2116, 1931, 1627, 1595, 1492, 1068 cm<sup>-1</sup>; **MS** (ESI) *m/z* 273.1 [M+H]<sup>+</sup>; **Elem. Anal.** Calcd. for C<sub>20</sub>H<sub>16</sub>O: C, 88.20; H, 5.92, found C, 87.89; H, 5.76.

**Step IV:** To a suspension of sodium hydride (60% in mineral oil, 133.5 mg, 3.3 mmol) in THF (8 mL) was added a solution of **S3** (816.8 mg, 3 mmol) in THF (4 mL) dropwise at 0 °C for 15 min. The resulting mixture was stirred at 0 °C for 4 hours in an ice-water bath followed by the addition of methyl chloroformate (465  $\mu$ L,  $d = 1.22$  g/mL, 567.3 mg, 6 mmol), stirred for extra 16 h while gradually warming up to room temperature, and quenched with H<sub>2</sub>O (10 mL) followed by the addition of ethyl ether (15 mL). The aqueous phase was extracted with ethyl ether (10 mL  $\times$  3). The combined organic extract was washed with brine (30 mL  $\times$  3), dried over anhydrous Na<sub>2</sub>SO<sub>4</sub>, filtrated, and evaporated. The residue was purified by chromatography on silica gel to afford **15** (357.1 mg, 36%) as a yellow oil: **<sup>1</sup>H NMR** (400 MHz, CDCl<sub>3</sub>):  $\delta$  7.88-7.71 (m, 4 H, ArH), 7.58-7.40 (m, 5 H, ArH), 7.35 (t,  $J = 7.6$  Hz, 2 H, ArH), 7.27 (t,  $J = 7.2$  Hz, 1 H, ArH), 6.91-6.81 (m, 1 H, =CH), 5.28 (dd,  $J_1 = 12.4$  Hz,  $J_2 = 2.0$  Hz, 1 H, one proton of CH<sub>2</sub>), 5.18 (dd,  $J_1 = 12.2$  Hz,  $J_2 = 1.8$  Hz, 1 H, one proton of CH<sub>2</sub>), 3.73 (s, 3 H, OCH<sub>3</sub>); **<sup>13</sup>C NMR** (100 MHz, CDCl<sub>3</sub>):  $\delta$  208.0, 155.6, 133.6, 133.2, 132.9, 130.4, 128.8, 128.4, 127.8, 127.73, 127.71, 126.35, 126.32, 126.1, 126.0, 124.8, 105.9, 99.6, 66.2, 54.9; **IR** (neat):  $\nu$ 3054, 2955, 2853, 1939, 1744, 1597, 1495, 1441, 1370, 1252  $\text{cm}^{-1}$ ; **MS** (ESI)  $m/z$  353.1 [M+Na]<sup>+</sup>; **HRMS** (ESI) Calcd for C<sub>22</sub>H<sub>18</sub>O<sub>3</sub>Na [M+Na]<sup>+</sup>: 353.1148, Found: 353.1145.

8.2 The reaction of methyl 4-(2-naphthyl)-2-phenylbuta-2,3-dienyl carbonate **15** under standard conditions (lican-08-011)

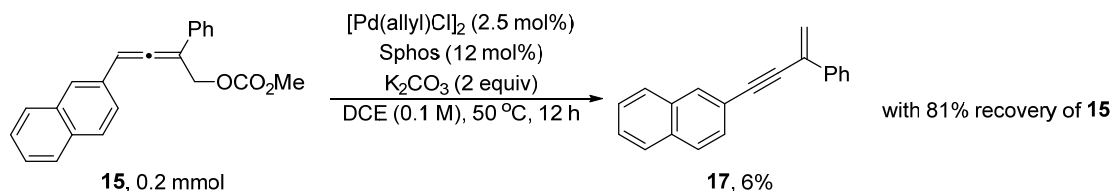

To a flame-dried Schlenk tube were added [Pd(allyl)Cl]<sub>2</sub> (1.9 mg, 0.005 mmol), Sphos (9.9 mg, 0.024 mmol), and K<sub>2</sub>CO<sub>3</sub> (55.9 mg, 0.4 mmol). After the addition, the Schlenk tube was degassed and refilled with Ar for three times to ensure the complete exclusion of air. Then DCE (1 mL) and a solution of **15** (66.0 mg, 0.2 mmol) in DCE (1 mL) were added under argon atmosphere. The resulting mixture was stirred at 50

°C for 12 h, filtered through a short column of silica gel (2 cm) eluted with ethyl acetate (10 mL), and concentrated. The residue was purified by column chromatography on silica gel to afford **17** (3.1 mg, 6%) [eluent: petroleum ether (200 mL)] as a yellowish oil: **<sup>1</sup>H NMR** (400 MHz, CDCl<sub>3</sub>): δ 8.06 (s, 1 H, ArH), 7.91-7.72 (m, 5 H, ArH), 7.58 (dd, *J*<sub>1</sub> = 8.6 Hz, *J*<sub>2</sub> = 1.4 Hz, 1 H, ArH), 7.54-7.46 (m, 2 H, ArH), 7.45-7.38 (m, 2 H, ArH), 7.37-7.30 (m, 1 H, ArH), 6.02 (s, 1 H, one proton of =CH<sub>2</sub>), 5.81 (s, 1 H, one proton of =CH<sub>2</sub>); **<sup>13</sup>C NMR** (100 MHz, CDCl<sub>3</sub>): δ 137.3, 133.0, 132.9, 131.6, 130.7, 128.45, 128.39, 128.0, 127.8, 126.7, 126.6, 126.1, 120.8, 120.4, 91.2, 88.9; **IR** (neat): ν 3053, 2291, 2200, 2117, 1802, 1595, 1567, 1492, 1443, 1347, 1323 cm<sup>-1</sup>; **MS** (70 eV, EI) *m/z* (%): 254 (M<sup>+</sup>, 100); **HRMS** (FI) Calcd for C<sub>20</sub>H<sub>14</sub> [M]<sup>+</sup>: 254.1090, Found: 254.1095.

(9) The reaction of methyl 4-(2-naphthyl)-2-phenylbuta-2,3-dienyl carbonate **15** with **3a** under standard conditions (lican-09-005)

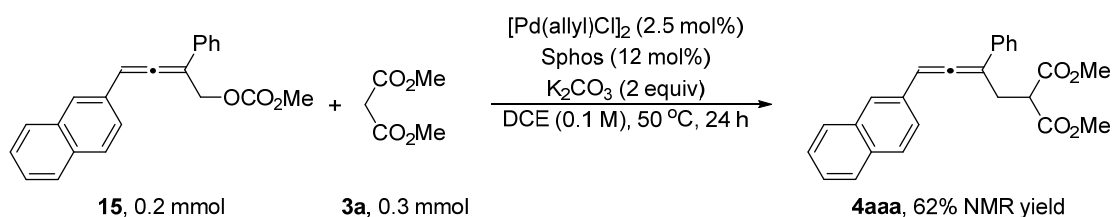

To a flame-dried Schlenk tube were added [Pd(allyl)Cl]<sub>2</sub> (1.8 mg, 0.005 mmol), Sphos (9.8 mg, 0.024 mmol), and K<sub>2</sub>CO<sub>3</sub> (55.8 mg, 0.4 mmol). After the addition, the Schlenk tube was degassed and refilled with Ar for three times to ensure the complete exclusion of air. Then DCE (1 mL), a solution of **15** (66.2 mg, 0.2 mmol) in DCE (1 mL) and **3a** (34 μL, d = 1.156 g/mL, 39.6 mg, 0.3 mmol) were added under argon atmosphere. The resulting mixture was stirred at 50 °C for 24 h, filtered through a short column of silica gel (1 cm) eluted with ethyl acetate (10 mL), and concentrated. 62% NMR yield of **4aaa** was formed as determined by the <sup>1</sup>H NMR analysis with CH<sub>2</sub>Br<sub>2</sub> as the internal standard.

(10) The monitoring experiment of **1a** with **2a** and **3a** (lican-09-009)

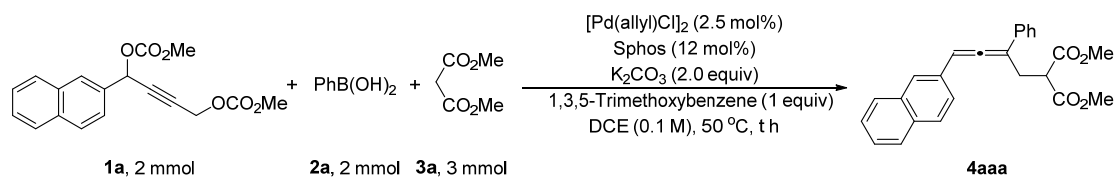

To a flame-dried Schlenk tube were added **1a** (656.7 mg, 2 mmol), [Pd(allyl)Cl]<sub>2</sub> (18.3 mg, 0.05 mmol), Sphos (98.7 mg, 0.24 mmol), **2a** (243.9 mg, 2 mmol), 1,3,5-Trimethoxybenzene (336.4 mg, 2 mmol) and K<sub>2</sub>CO<sub>3</sub> (552.9 mg, 4 mmol). After the addition, the Schlenk tube was degassed and refilled with Ar for three times to ensure the complete exclusion of air. Then DCE (20 mL) and **3a** (396.9 mg, 3 mmol) were added sequentially under argon atmosphere. The resulting mixture was stirred at 50 °C. 0.2 mL each of the aliquot was taken with an Ar-purged syringes after 0.5 h, 1.0 h, 1.5 h, 2.0 h, 2.5 h, 3.0 h and analyzed by <sup>1</sup>H NMR spectra with 1,3,5-trimethoxybenzene as the internal standard to determine the yields of **4aaa** and the recoveries of **1a**. All the data acquired were analyzed by Origin 8.0.

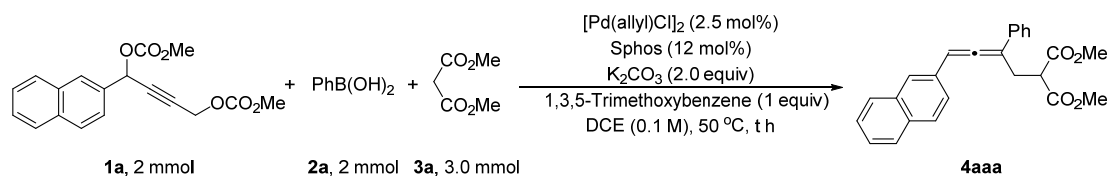

| entry | t (h) | NMR yield of <b>4aaa</b> (%) | recovery of <b>1a</b> (%) |
|-------|-------|------------------------------|---------------------------|
| 1     | 0.5   | 17                           | 79                        |
| 2     | 1.0   | 35                           | 57                        |
| 3     | 1.5   | 58                           | 31                        |
| 4     | 2.0   | 80                           | 10                        |
| 5     | 2.5   | 88                           | /                         |
| 6     | 3.0   | 89                           | /                         |

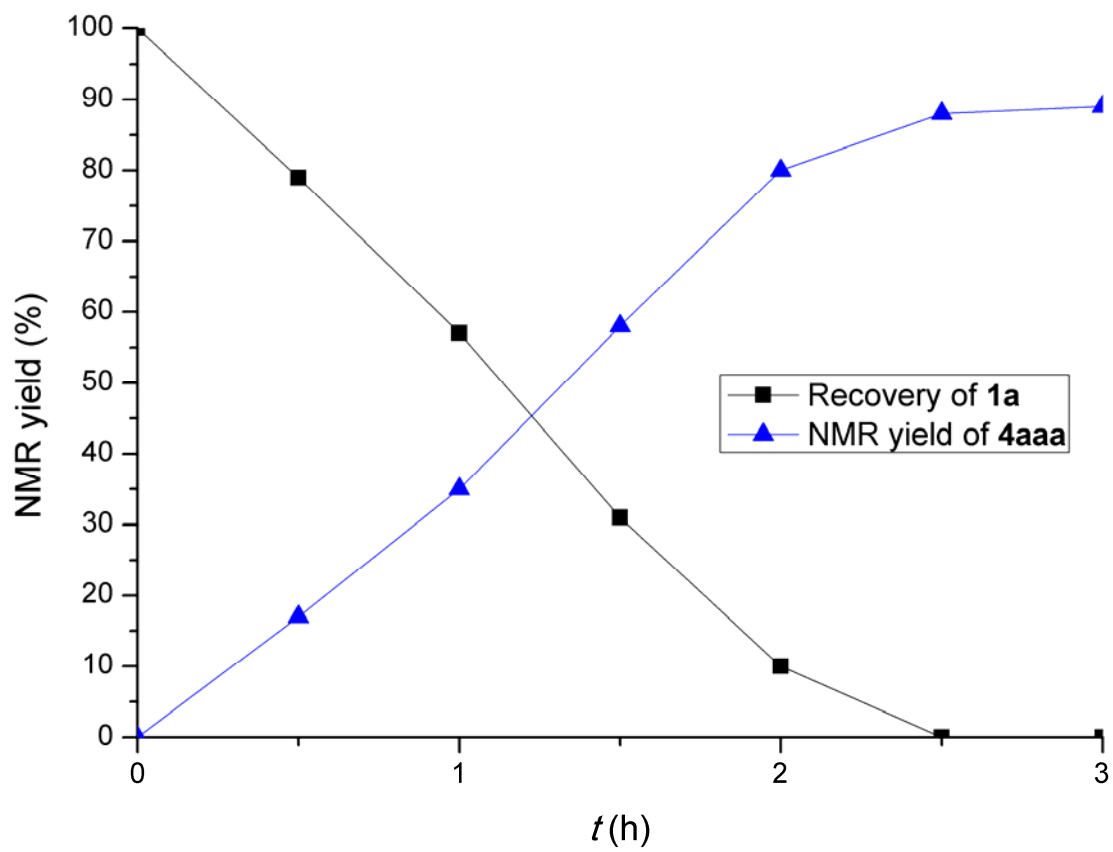



## References

- (1) Xiao, J.; Luo, H.; Huang, S.; Qian, H.; Ma, S. Tri(o-tolyl)phosphine for Highly Efficient Suzuki Coupling of Propargylic Carbonates with Boronic Acids. *Chem. Commun.* **2018**, *54*, 10451-10454.
- (2) Lu, P.; Ma, S. Rh-Catalyzed Triple Allene Approach to Bicyclo[4.4.0]decene Derivatives and Its Application for the Stepwise Synthesis of Steroid-Like Tetracyclic Skeletons. *Org. Lett.* **2007**, *9*, 5319-5321.
- (3) Sowden, M. J.; Ward, J. S.; Sherburn, M. S. Synthesis and Properties of 2,3-Diethynyl-1,3-Butadienes. *Angew. Chem., Int. Ed.* **2020**, *59*, 4145-4153.
- (4) Jiang, X.; Liu, J.; Ma, S. Iron-Catalyzed Aerobic Oxidation of Alcohols: Lower Cost and Improved Selectivity. *Org. Process Res. Dev.* **2019**, *23*, 825-835.
- (5) Wang, W.; Yu, Y.; Cheng, B.; Fang, H.; Zhang, X.; Qian, H.; Ma, S. Stereodefined rhodium-catalysed 1,4-H/D delivery for modular syntheses and deuterium integration. *Nat. Catal.* **2021**, *4*, 586-594.
- (6) van der Born, Dion.; Vugts, Danielle J. et. al. A universal procedure for the [<sup>18</sup>F]trifluoromethylation of aryl iodides and aryl boronic acids with highly improved specific activity. *Angew. Chem. Int. Ed.* **2014**, *53*, 11046-11050.
- (7) Sontakke, G. S.; Shukla, R. K.; Volla, C. M. R. *Adv. Synth. Catal.* **2022**, *364*, 565-573.
- (8) Fan, Y. M.; Sowden, M. J.; Magann, N. L.; Lindeboom, E. J.; Gardiner, M. G.; Sherburn, M. S. *J. Am. Chem. Soc.* **2022**, *144*, 20090-20098.
- (9) Pascual, C.; Meier, J.; Simon, W. *Helv. Chim. Acta* **1966**, *49*, 164-168.

7.984  
7.871  
7.849  
7.820  
7.615  
7.595  
7.513  
7.505  
7.498  
7.490  
6.500

4.844

3.805

-0.000

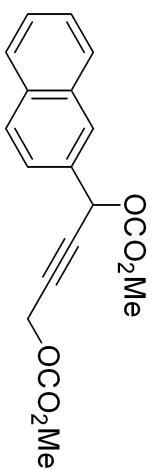

**1a**

6.06

lican-05-077-H  
May 04 2021  
NA = 16  
Solvent = CDCl3  
F1 = 400.100006 MHz  
F2 = 1.000000 MHz

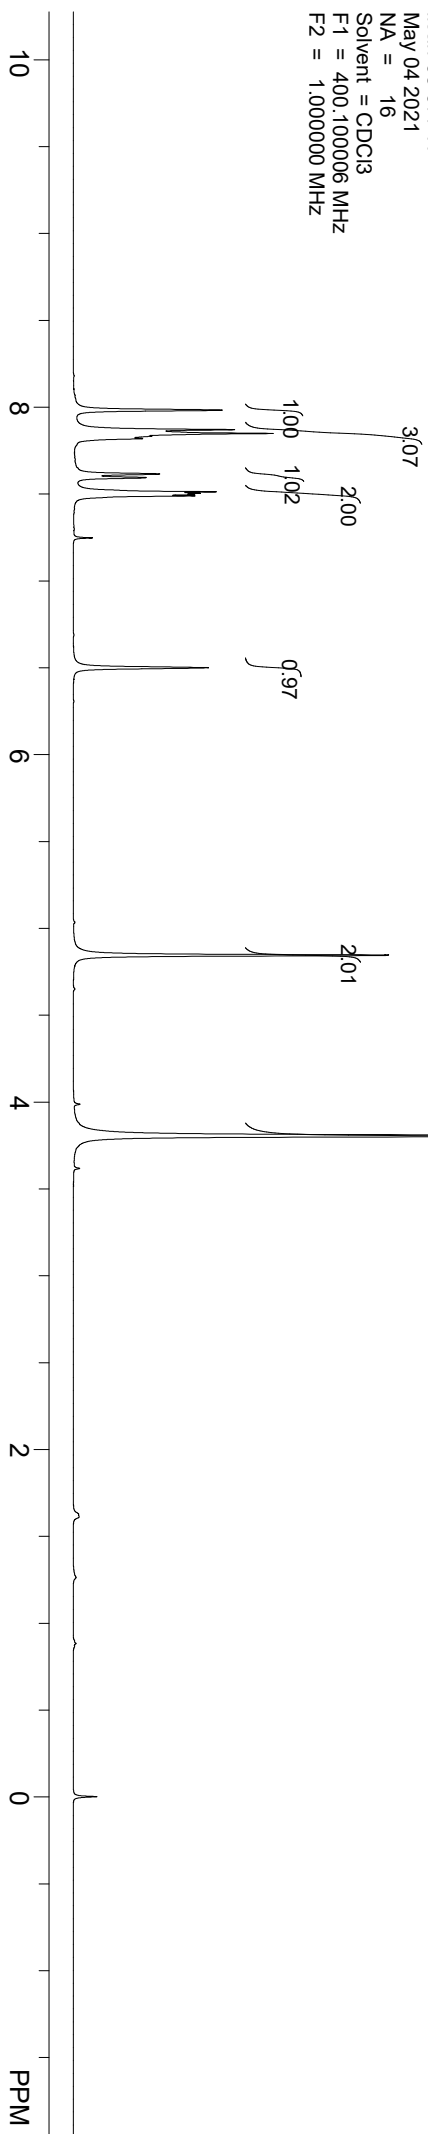

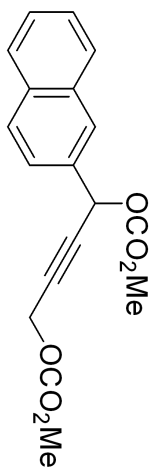

lican-05-077-C  
May 04 2024  
NA = 1024  
Solvent = CDCl<sub>3</sub>  
F1 = 100.605225 MHz  
F2 = 1.000000 MHz

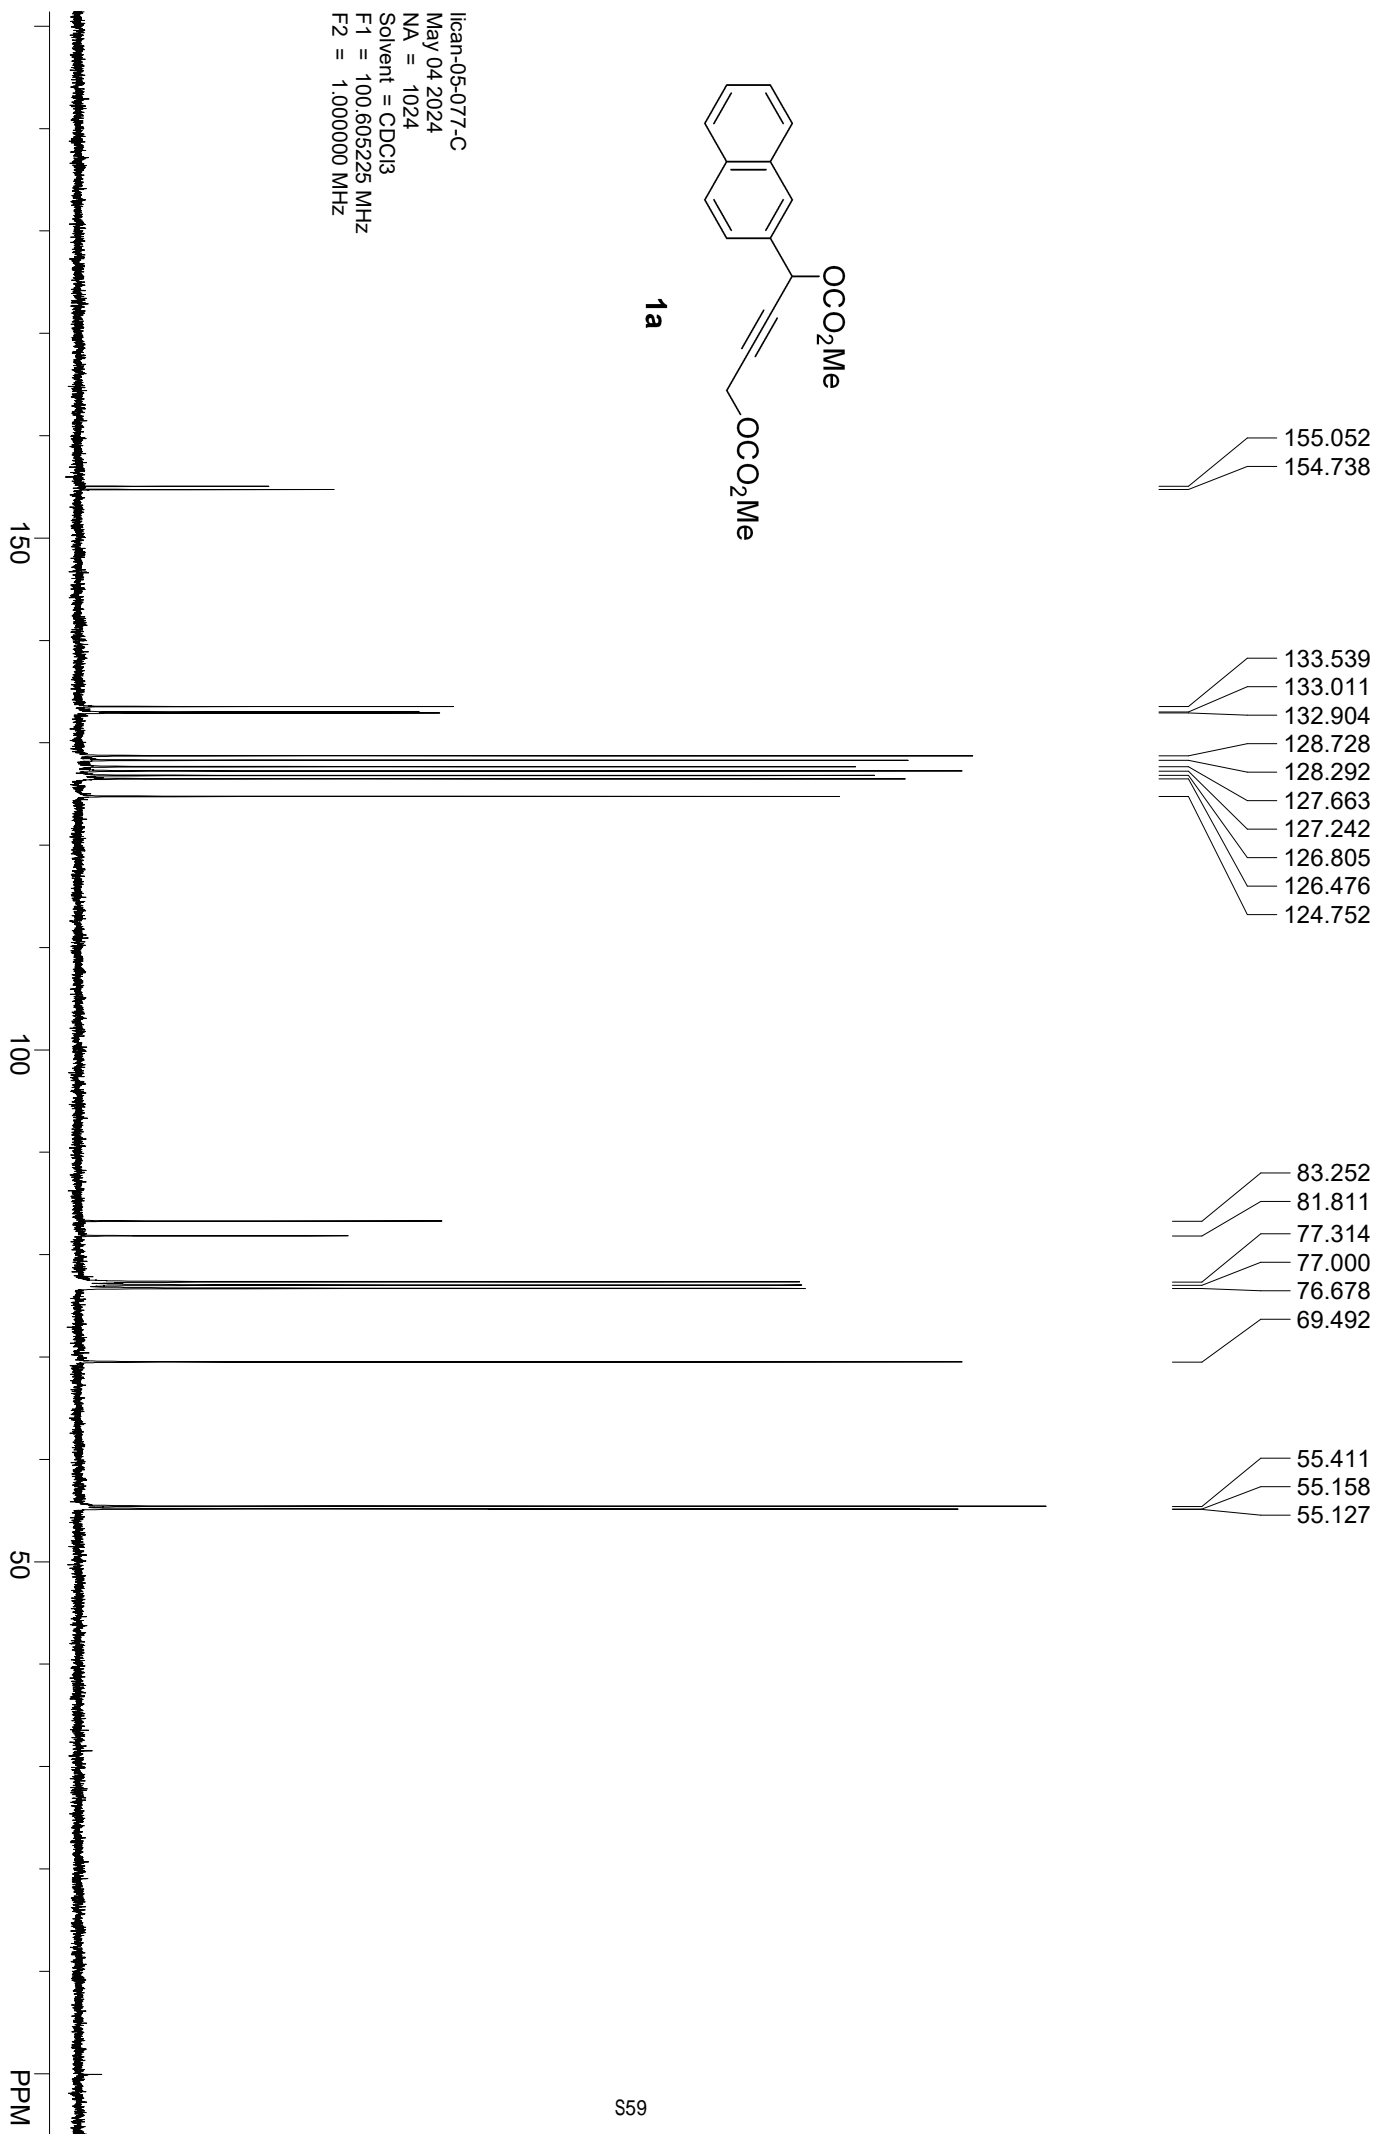

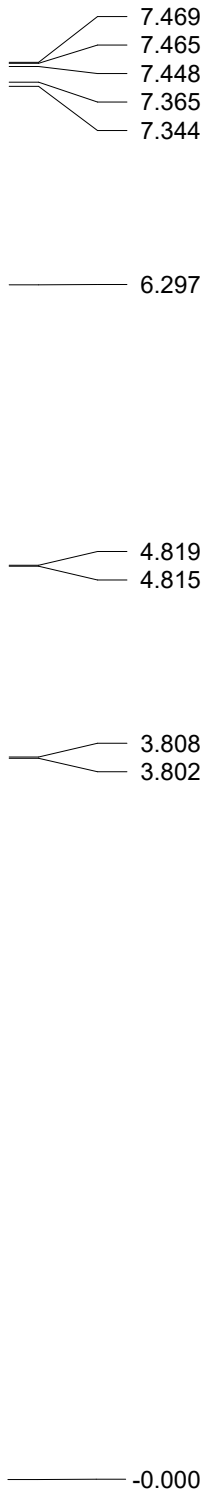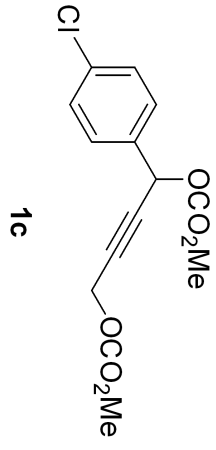

zzn-1-047-H-bruker  
 Sep 7 2021  
 SOLVENT: CDCl3  
 NA = 16  
 F1 = 400.100006 MHz  
 F2 = 1.000000 MHz

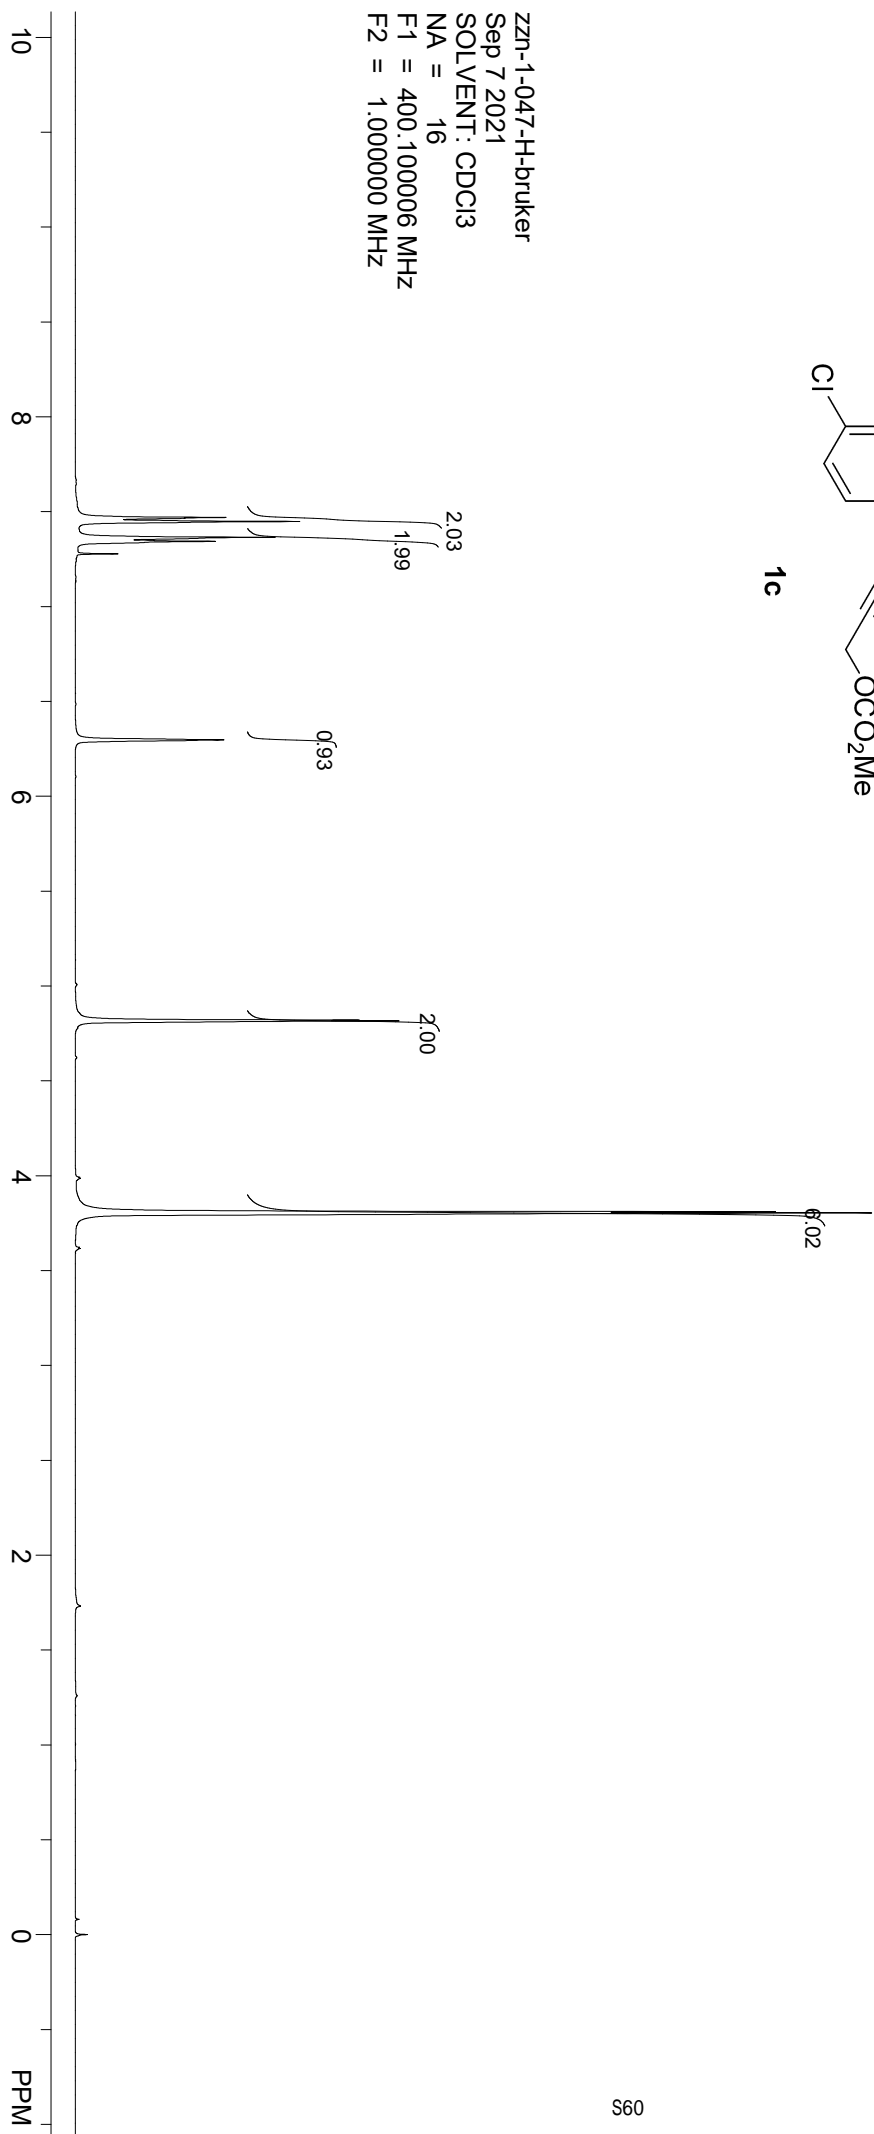

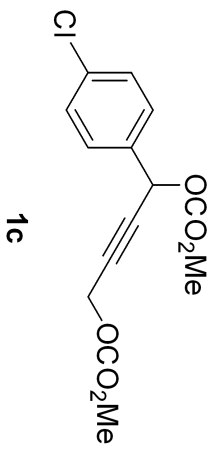

zZn-1-047-C-bruker  
Sep 7 2021  
SOLVENT: CDCl3  
NA = 1024  
F1 = 100.605225 MHz  
F2 = 1.000000 MHz

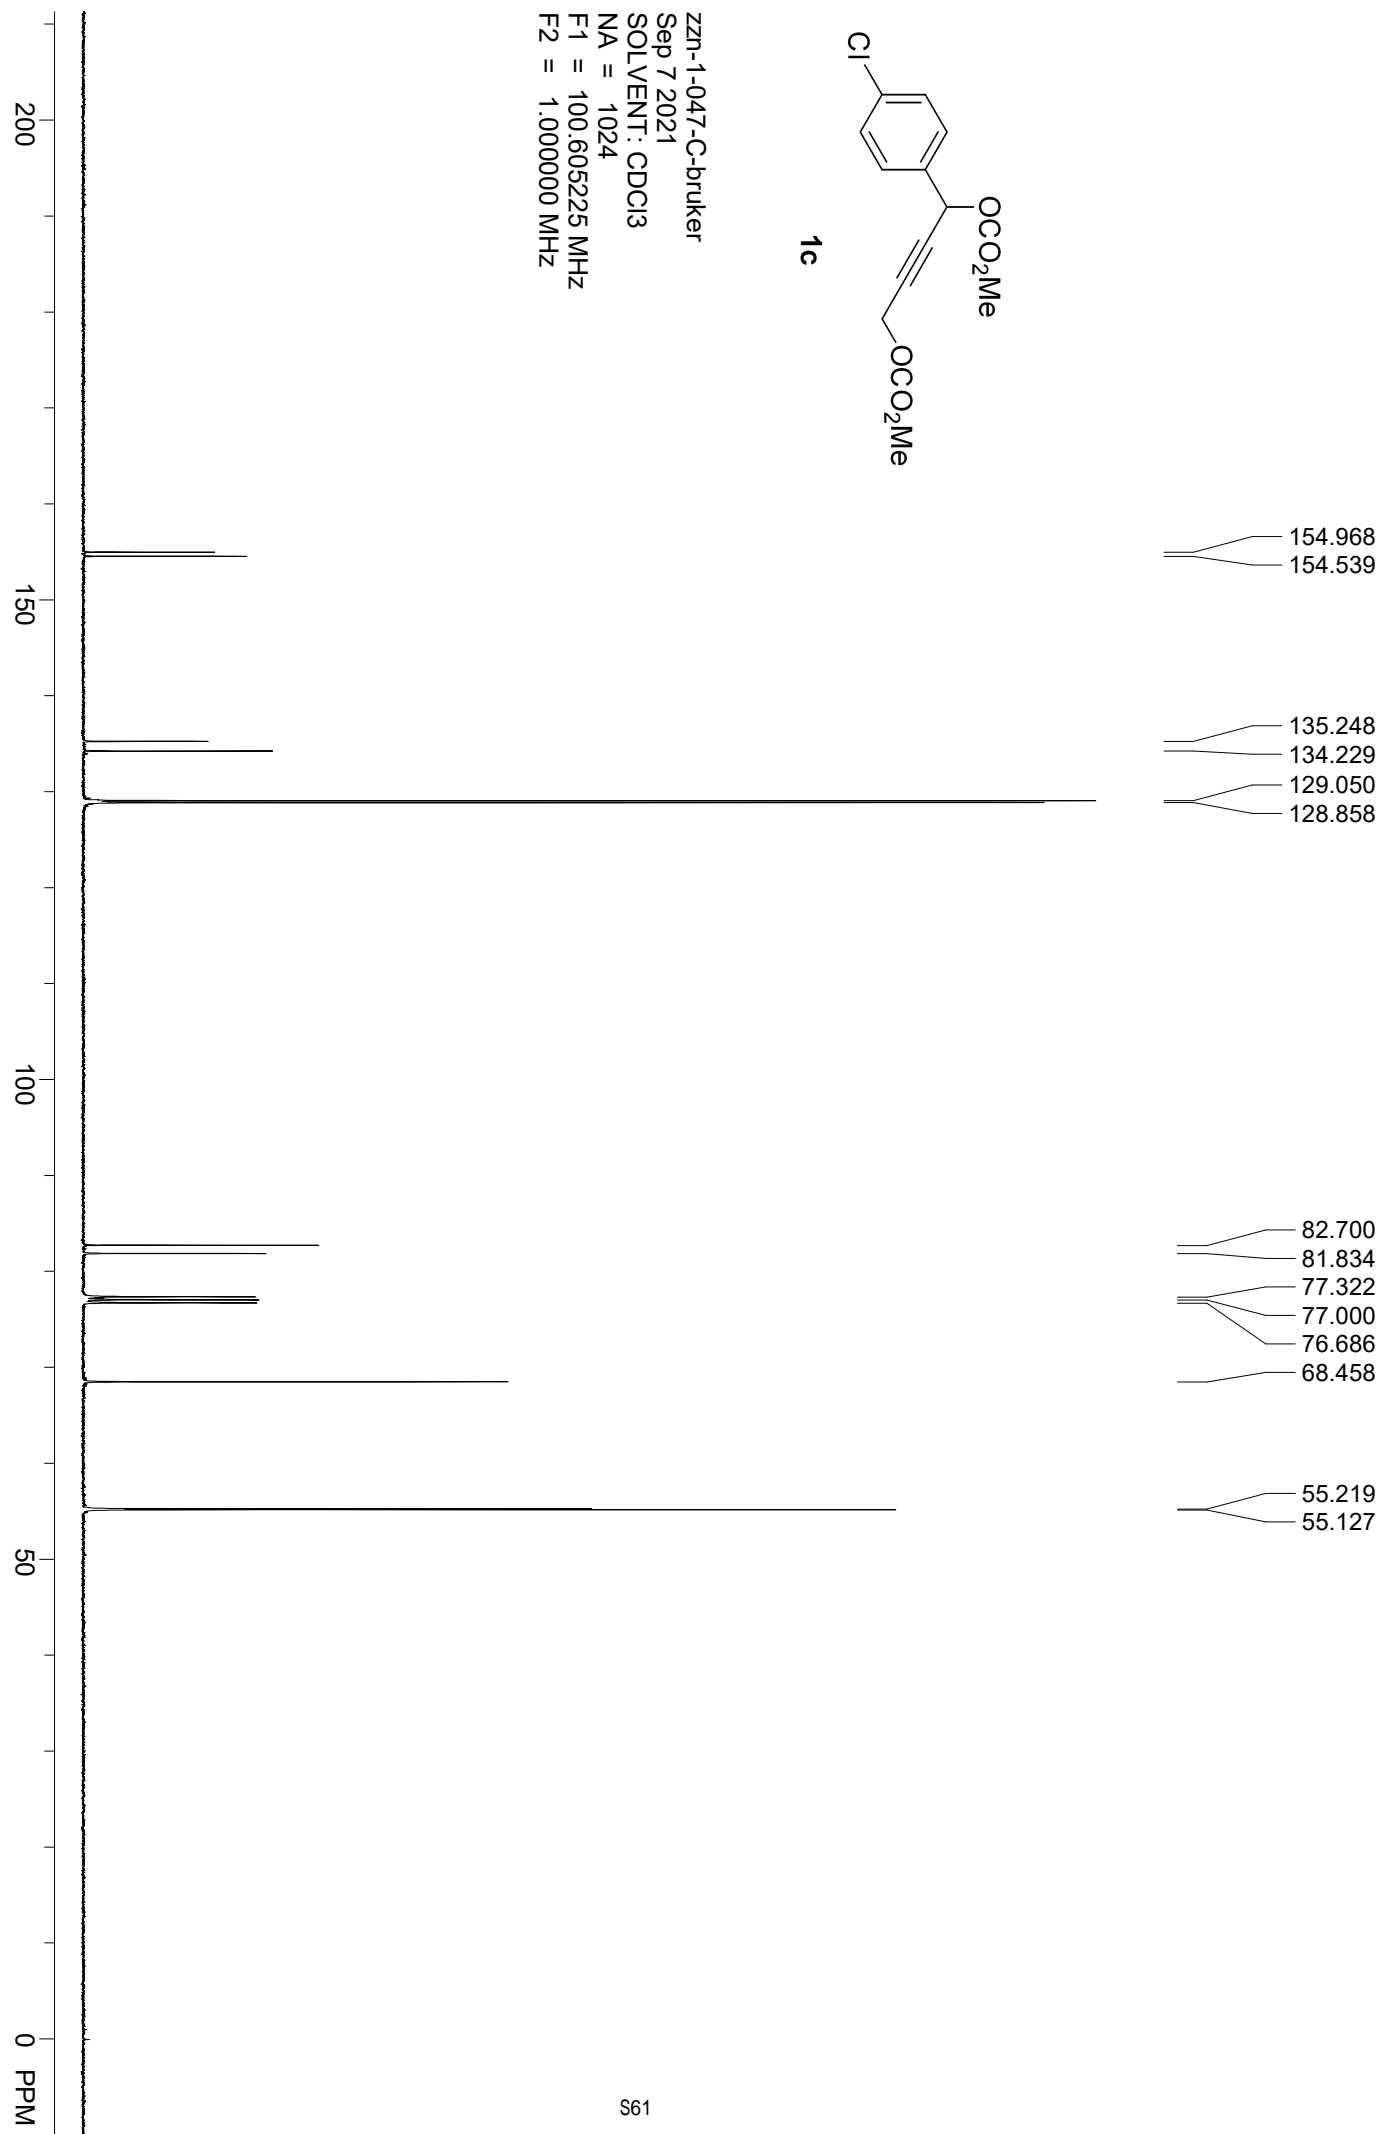

lican-05-070-H.fid  
Apr 28 2021  
NA = 8  
Solvent = CDCl3  
F1 = 399.723236 MHz  
F2 = 100.519203 MHz

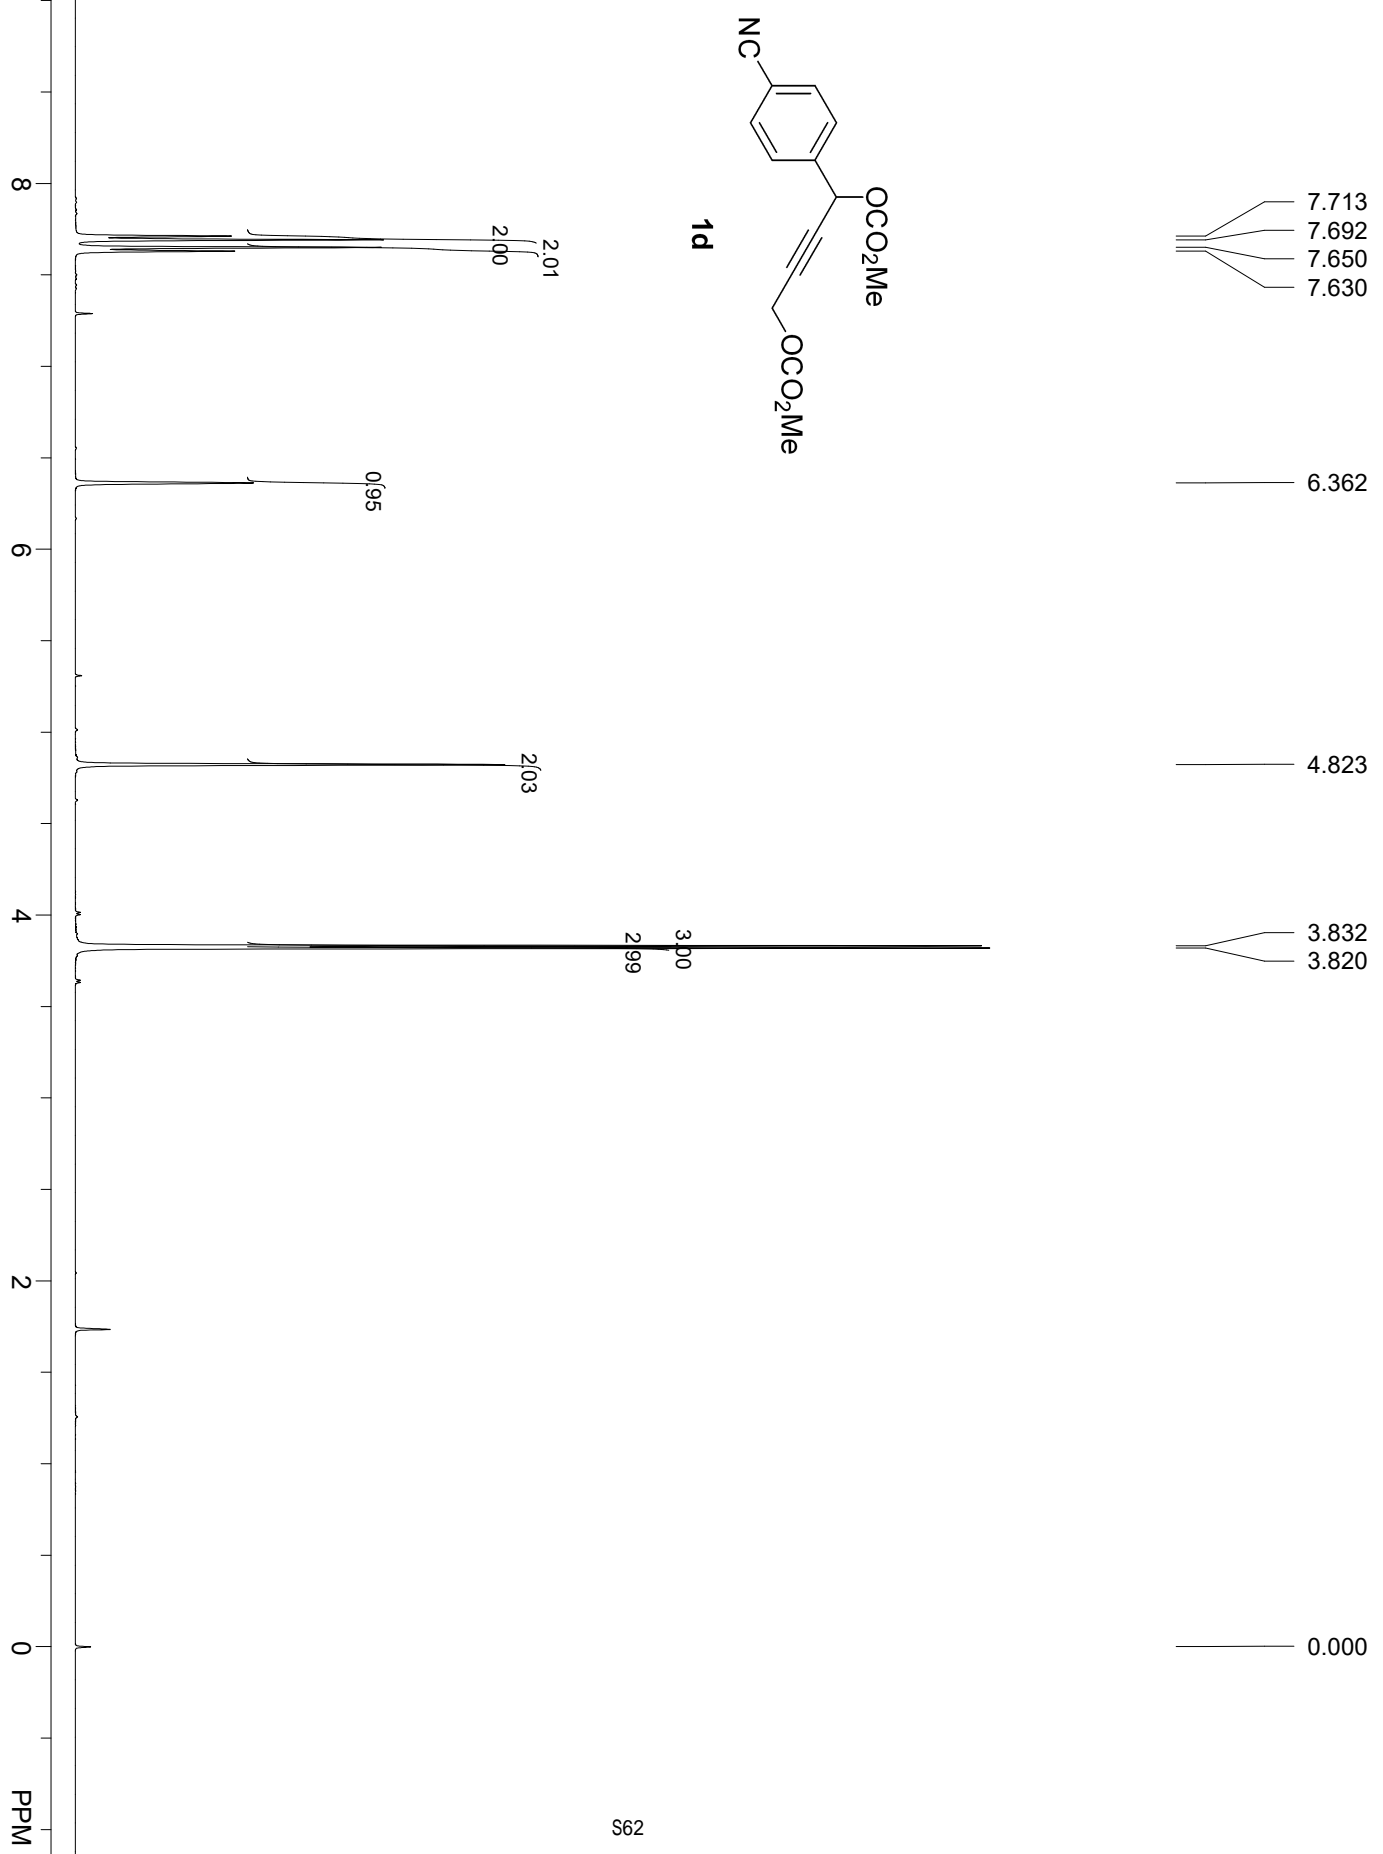

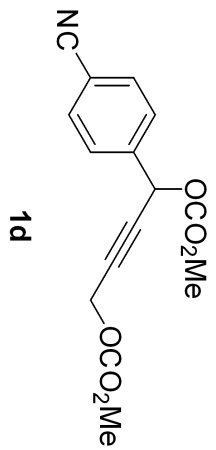

lican-05-070-C  
 Apr 28 2021  
 NA = 476  
 Solvent = CDCl3  
 F1 = 100.605225 MHz  
 F2 = 1.000000 MHz

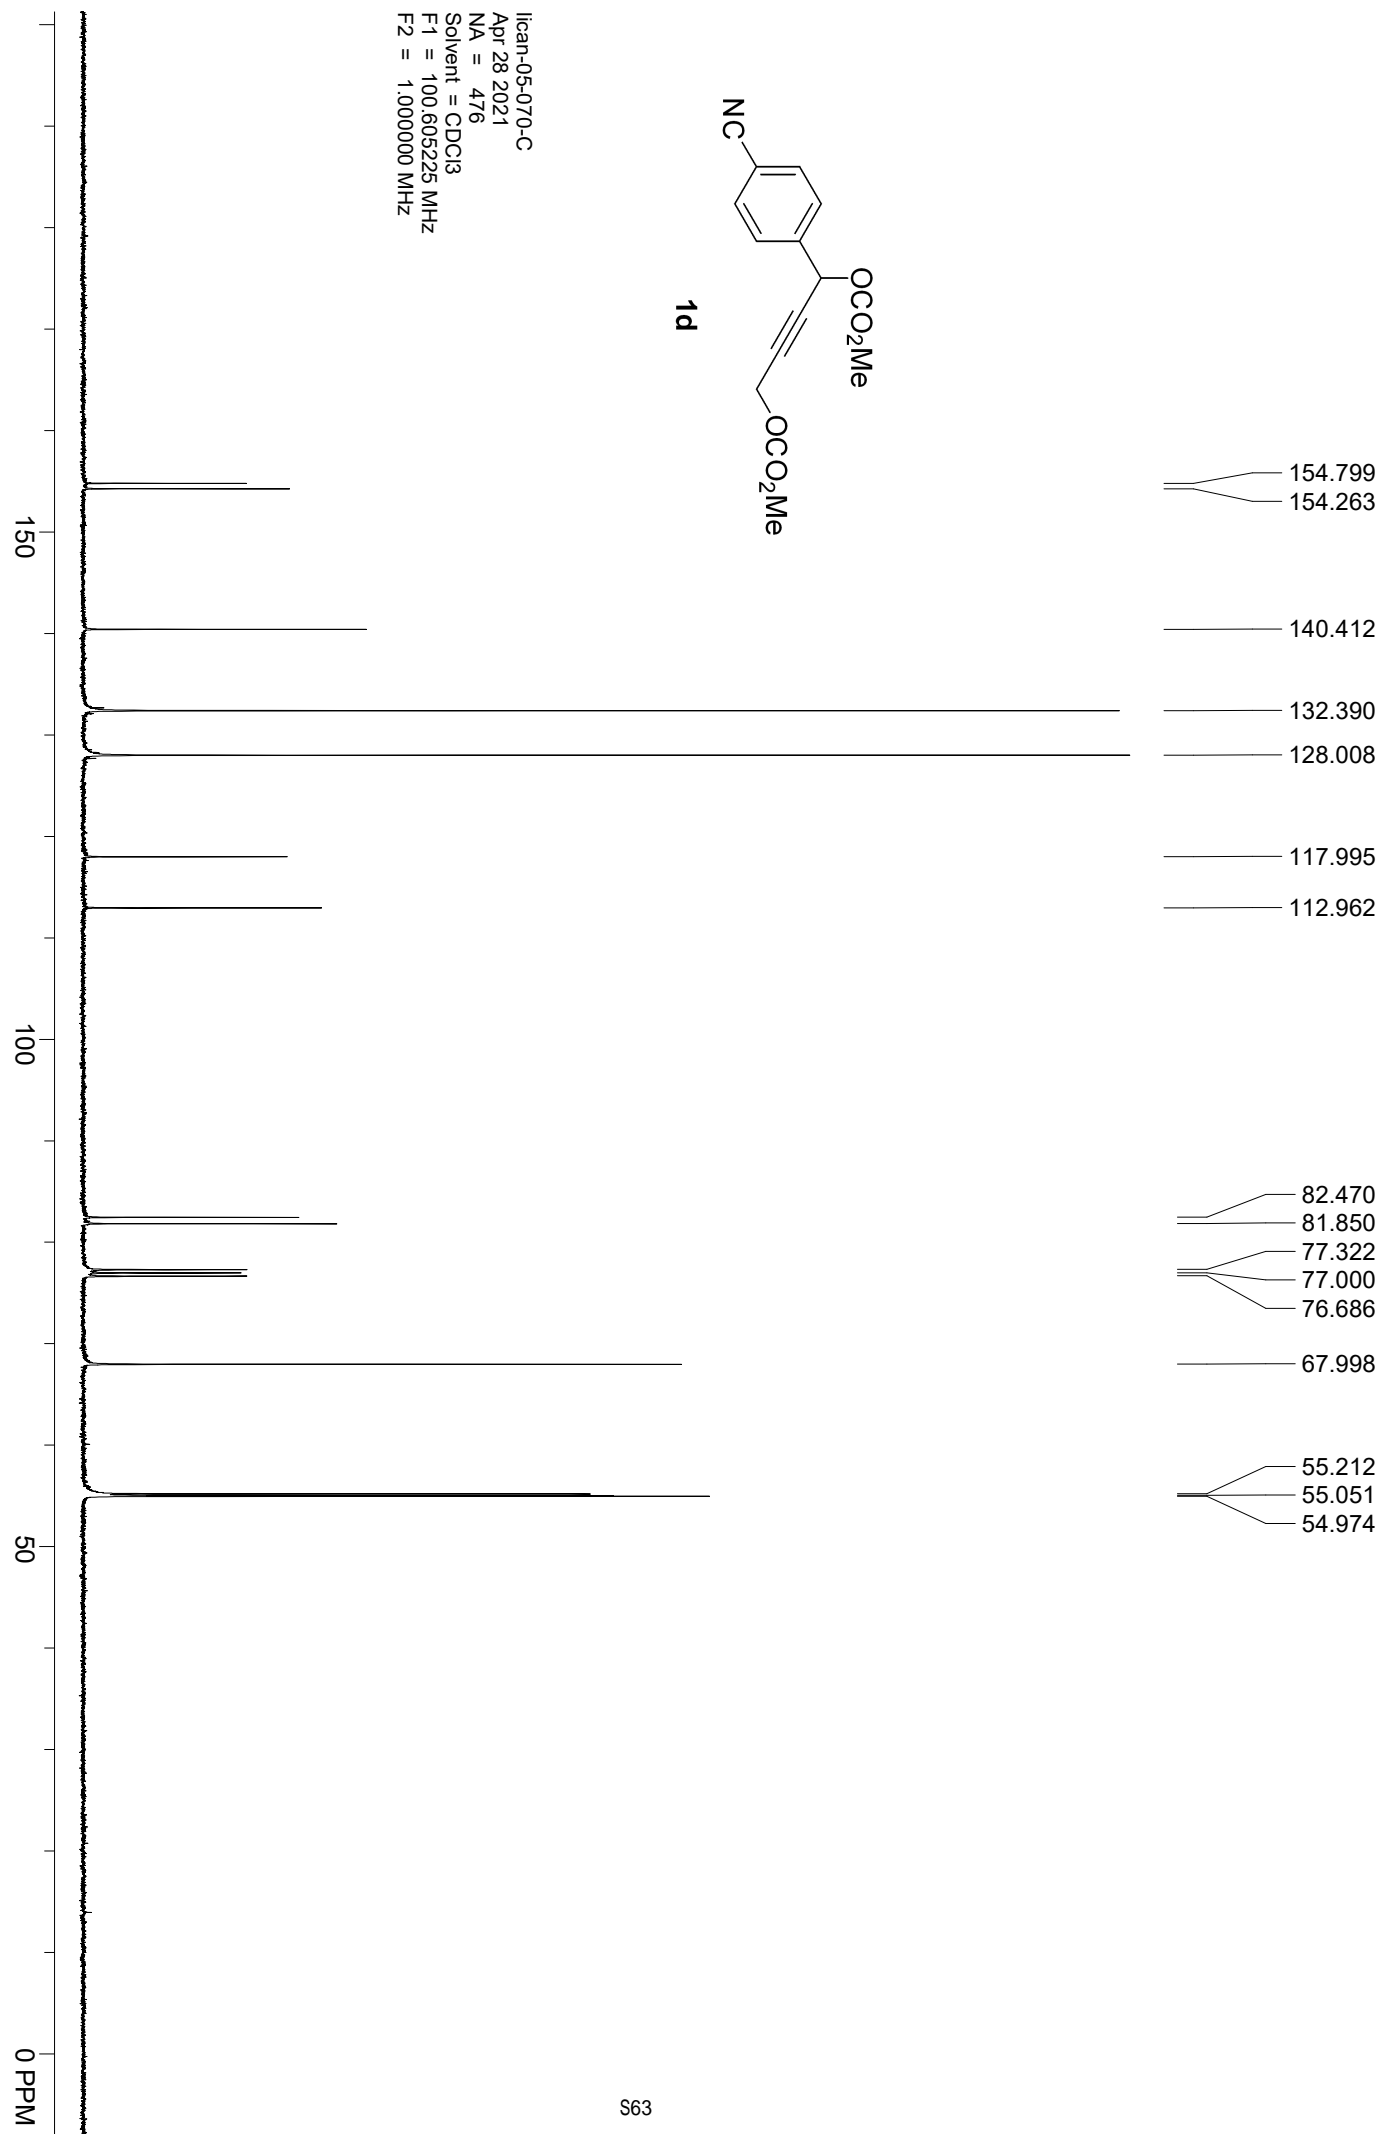

zzn-1-057-H  
Sep 17 2021  
SOLVENT: CDCl3  
NA = 8  
F1 = 399.717865 MHz

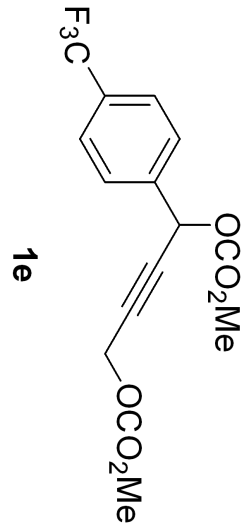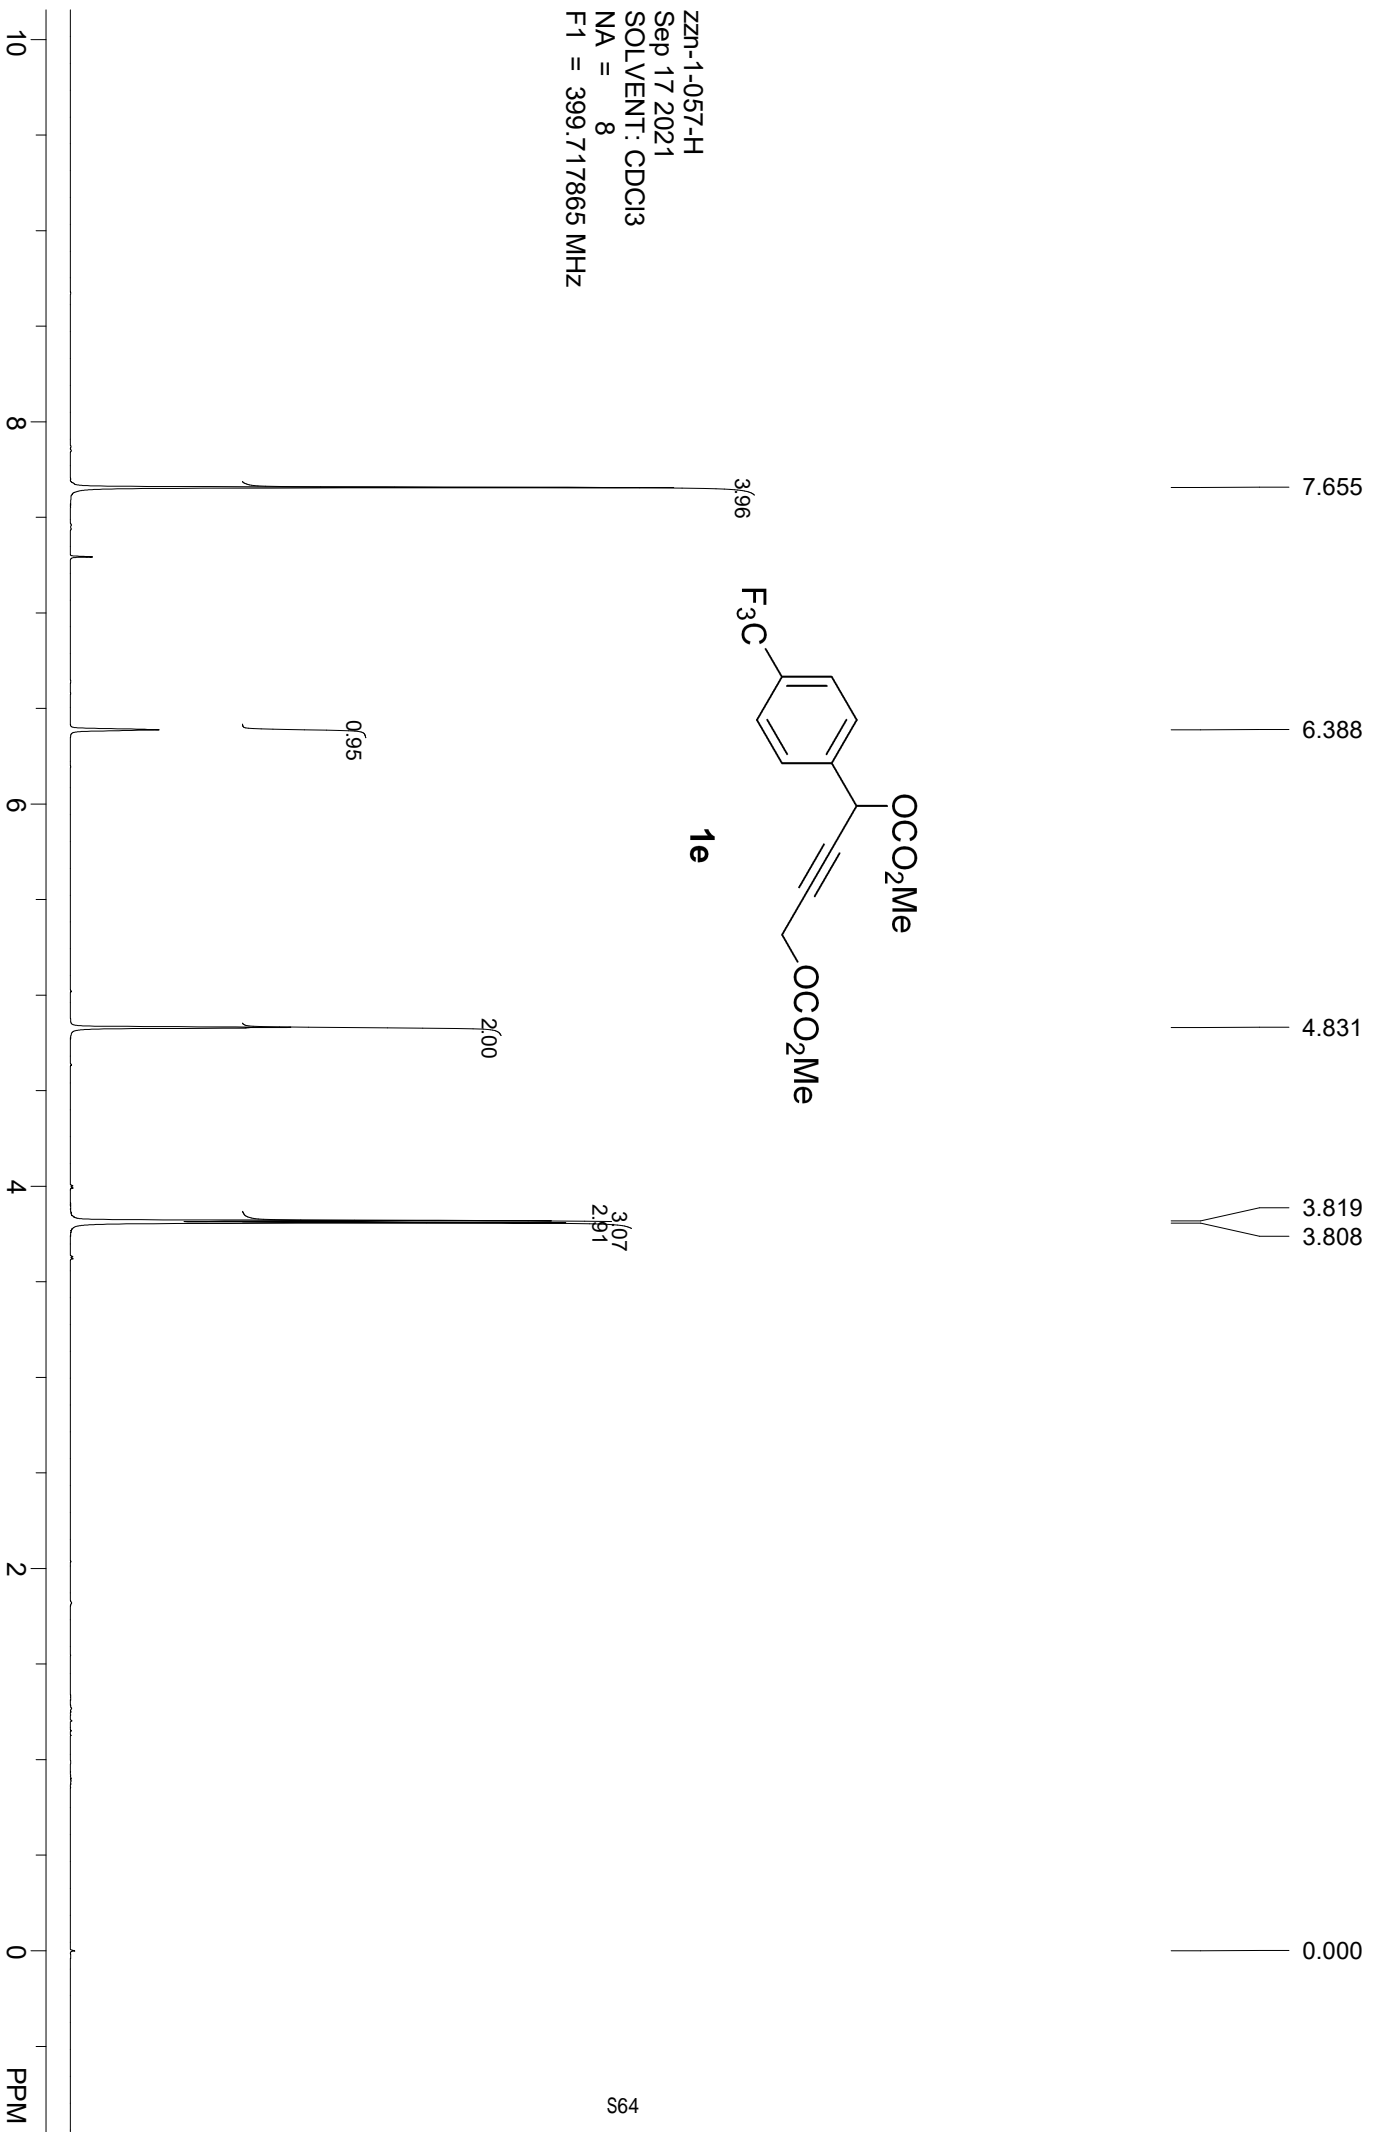



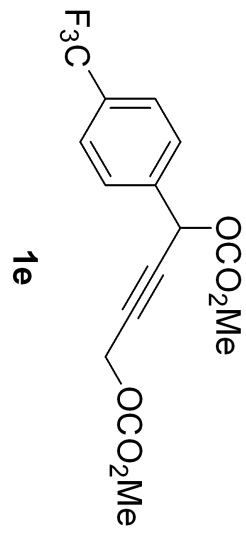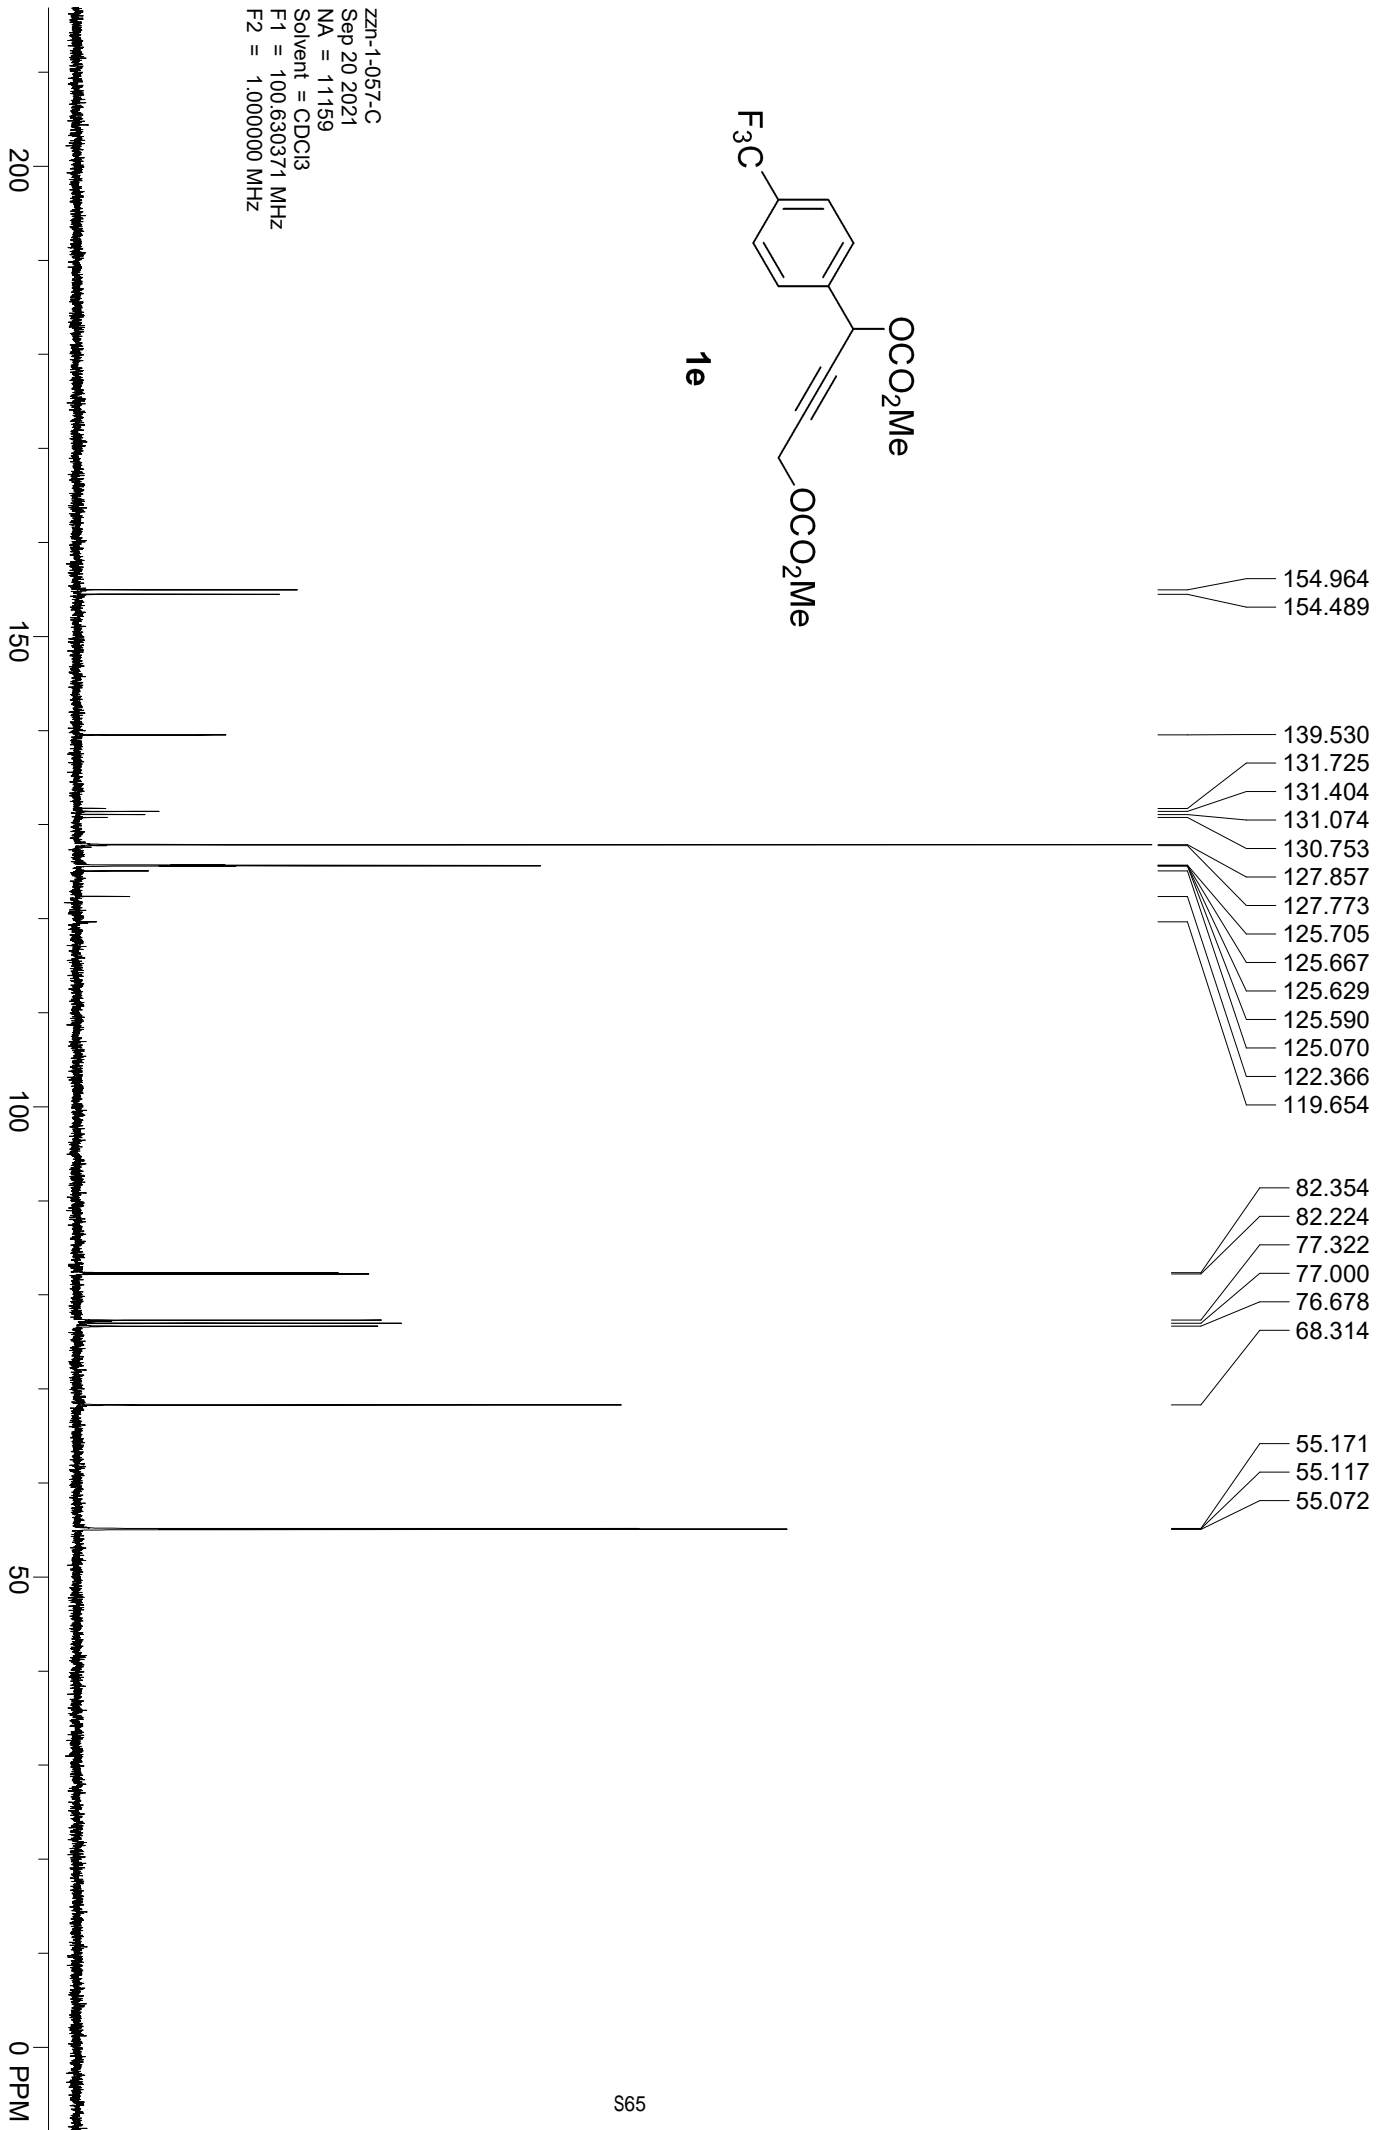

zzn-1-057-F  
Sep 20 2021  
SOLVENT: CDCl3  
NA = 4  
F1 = 376.365509 MHz

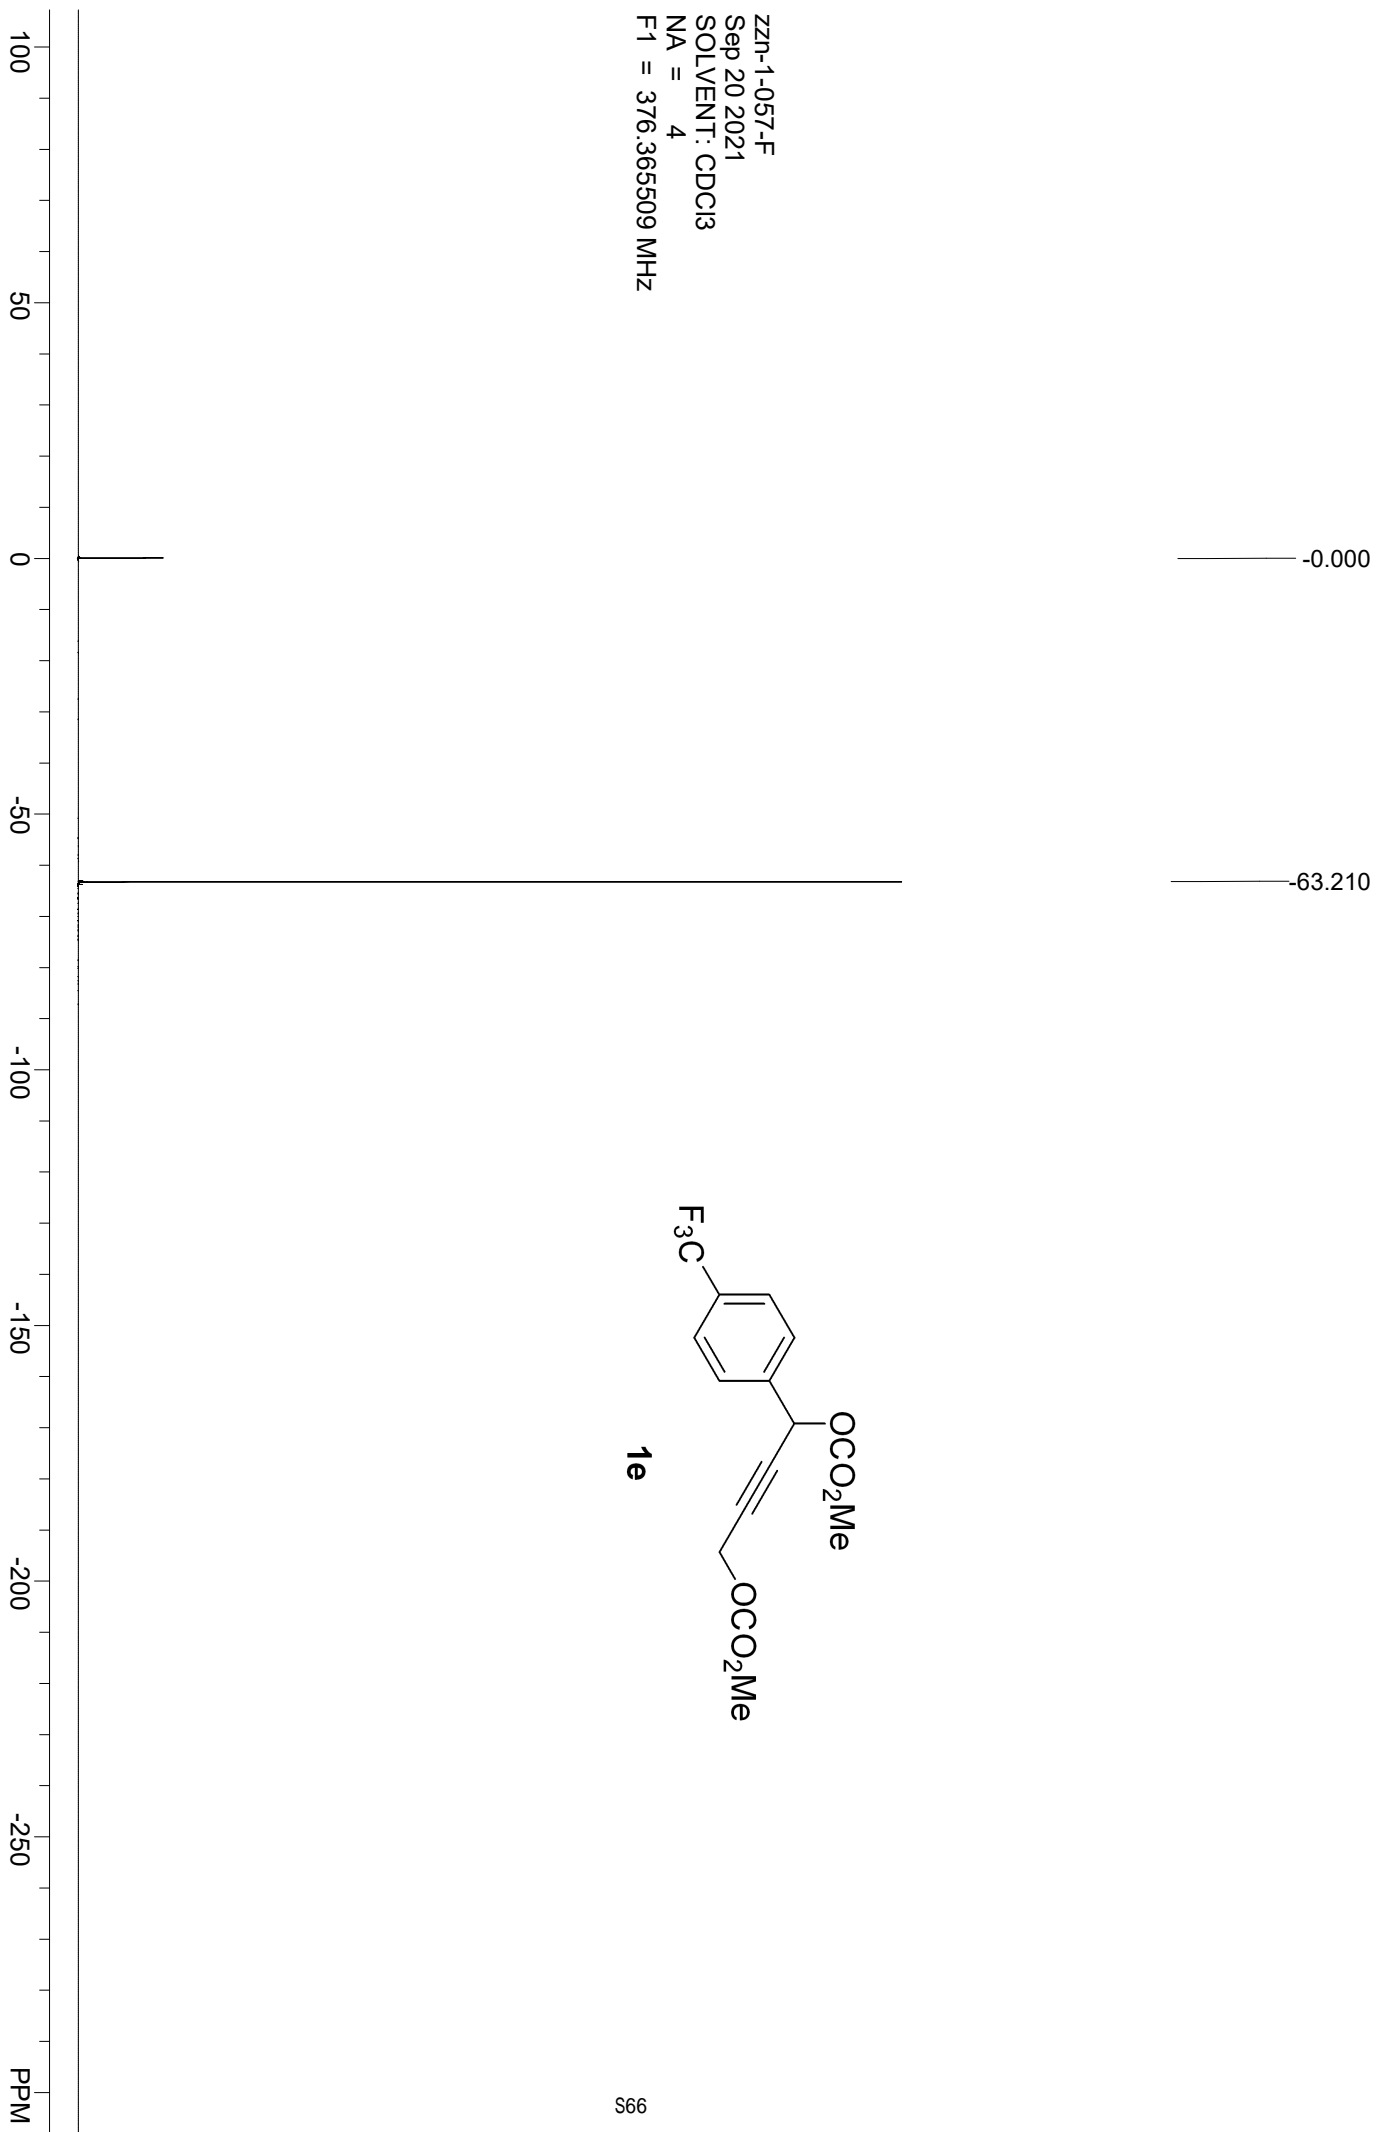

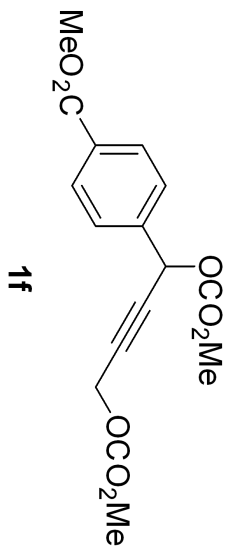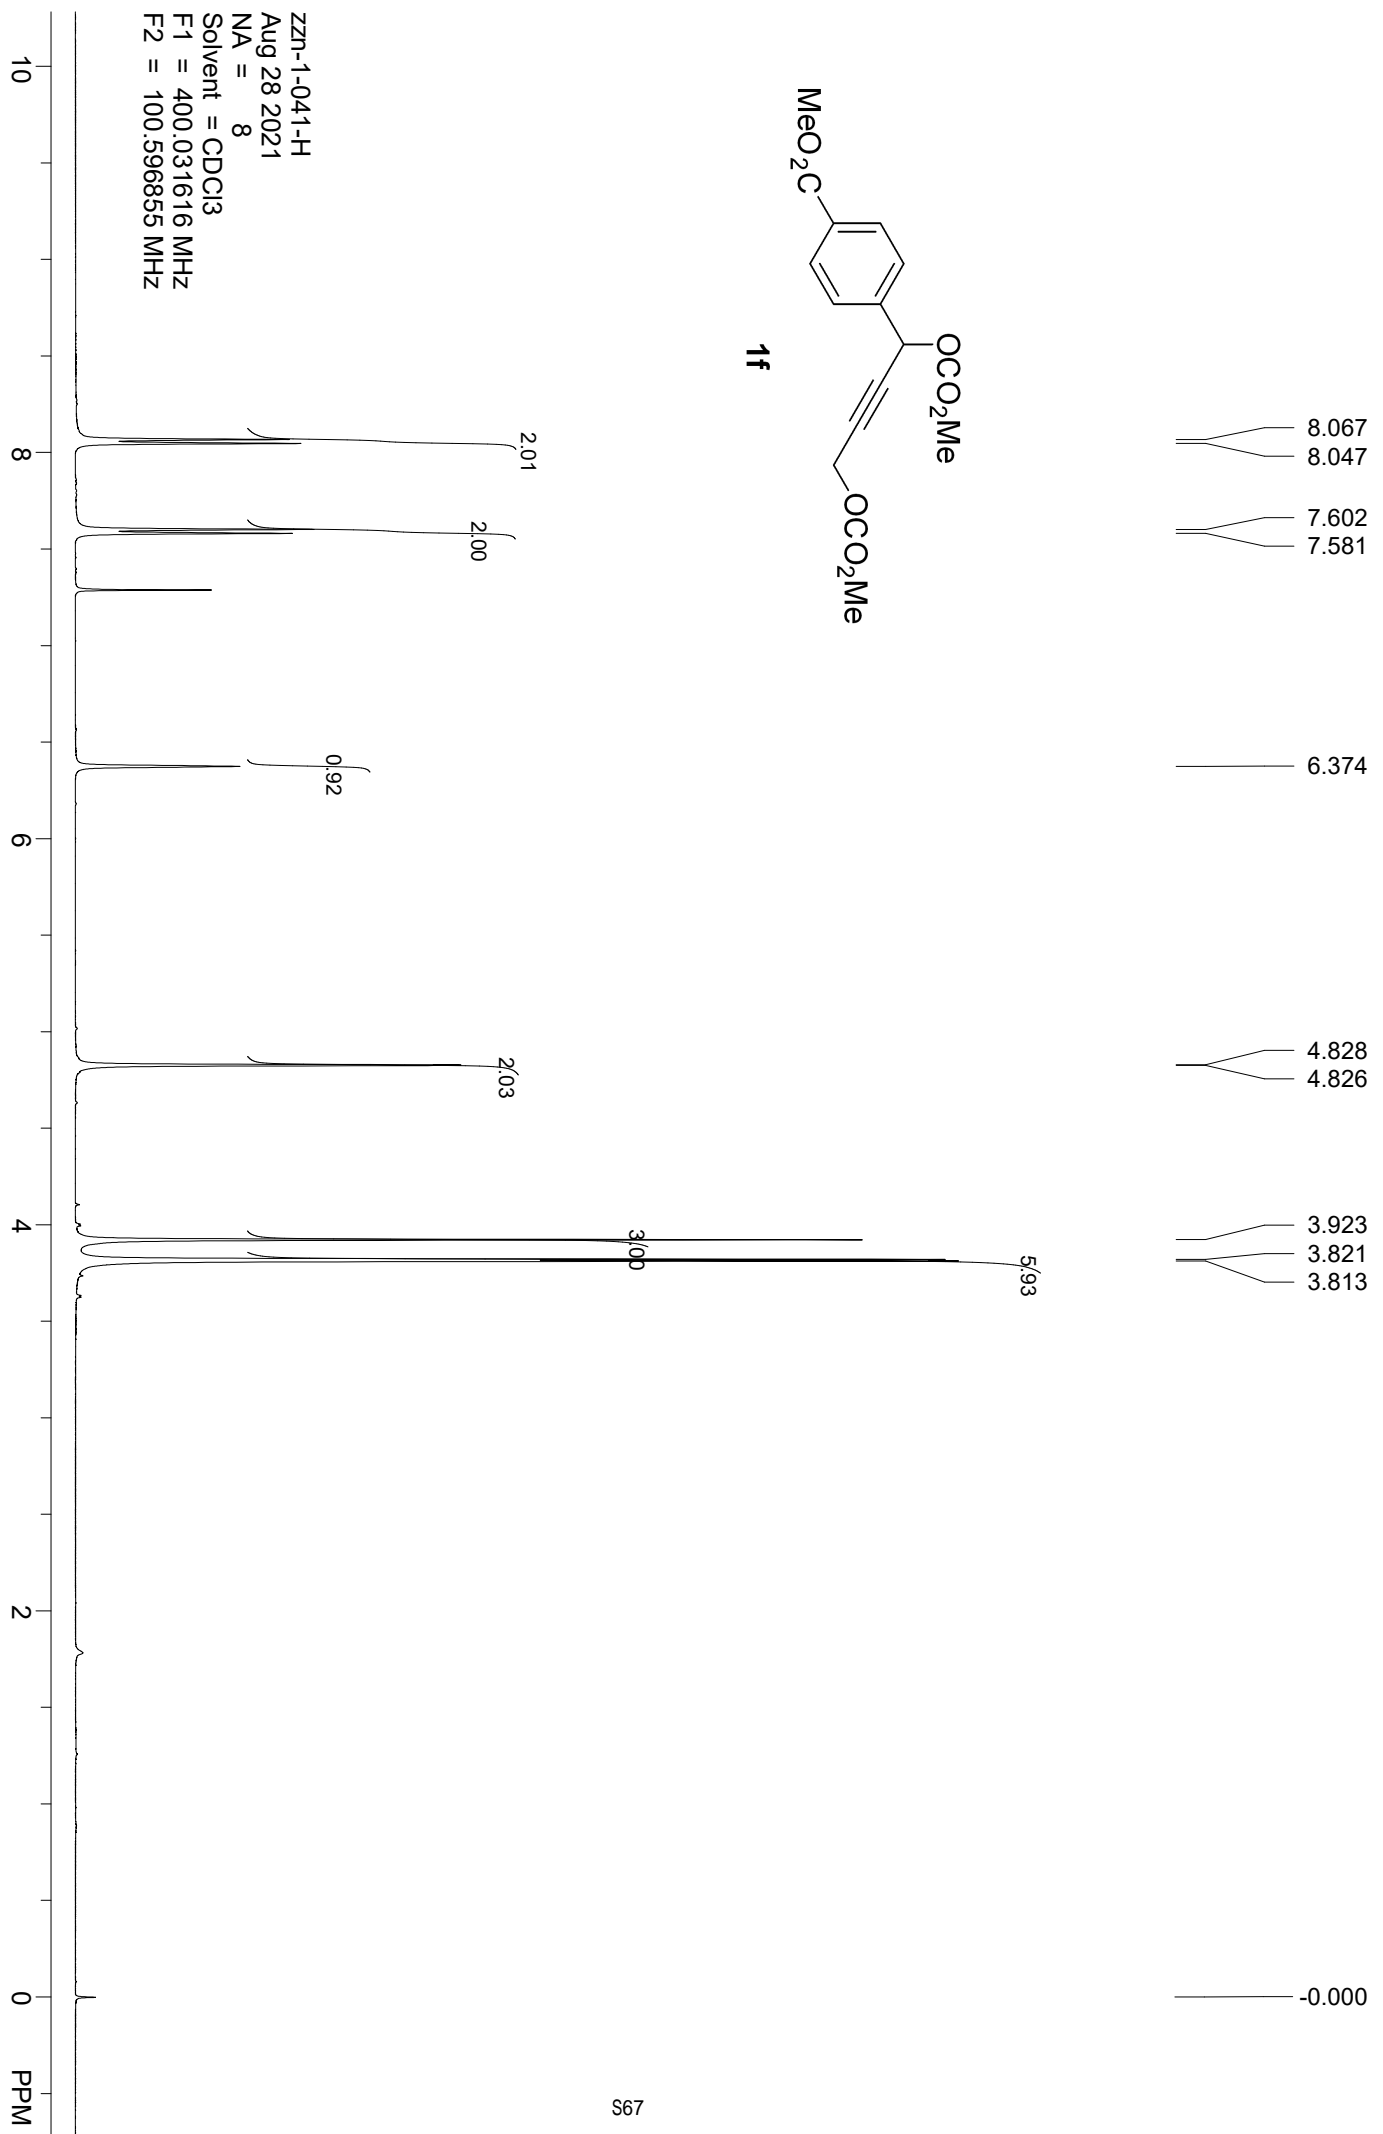

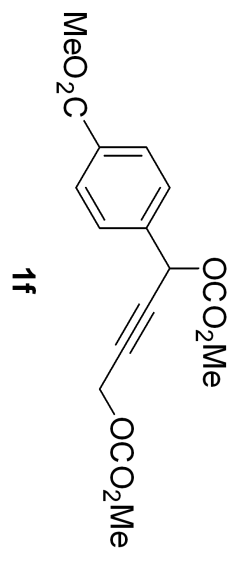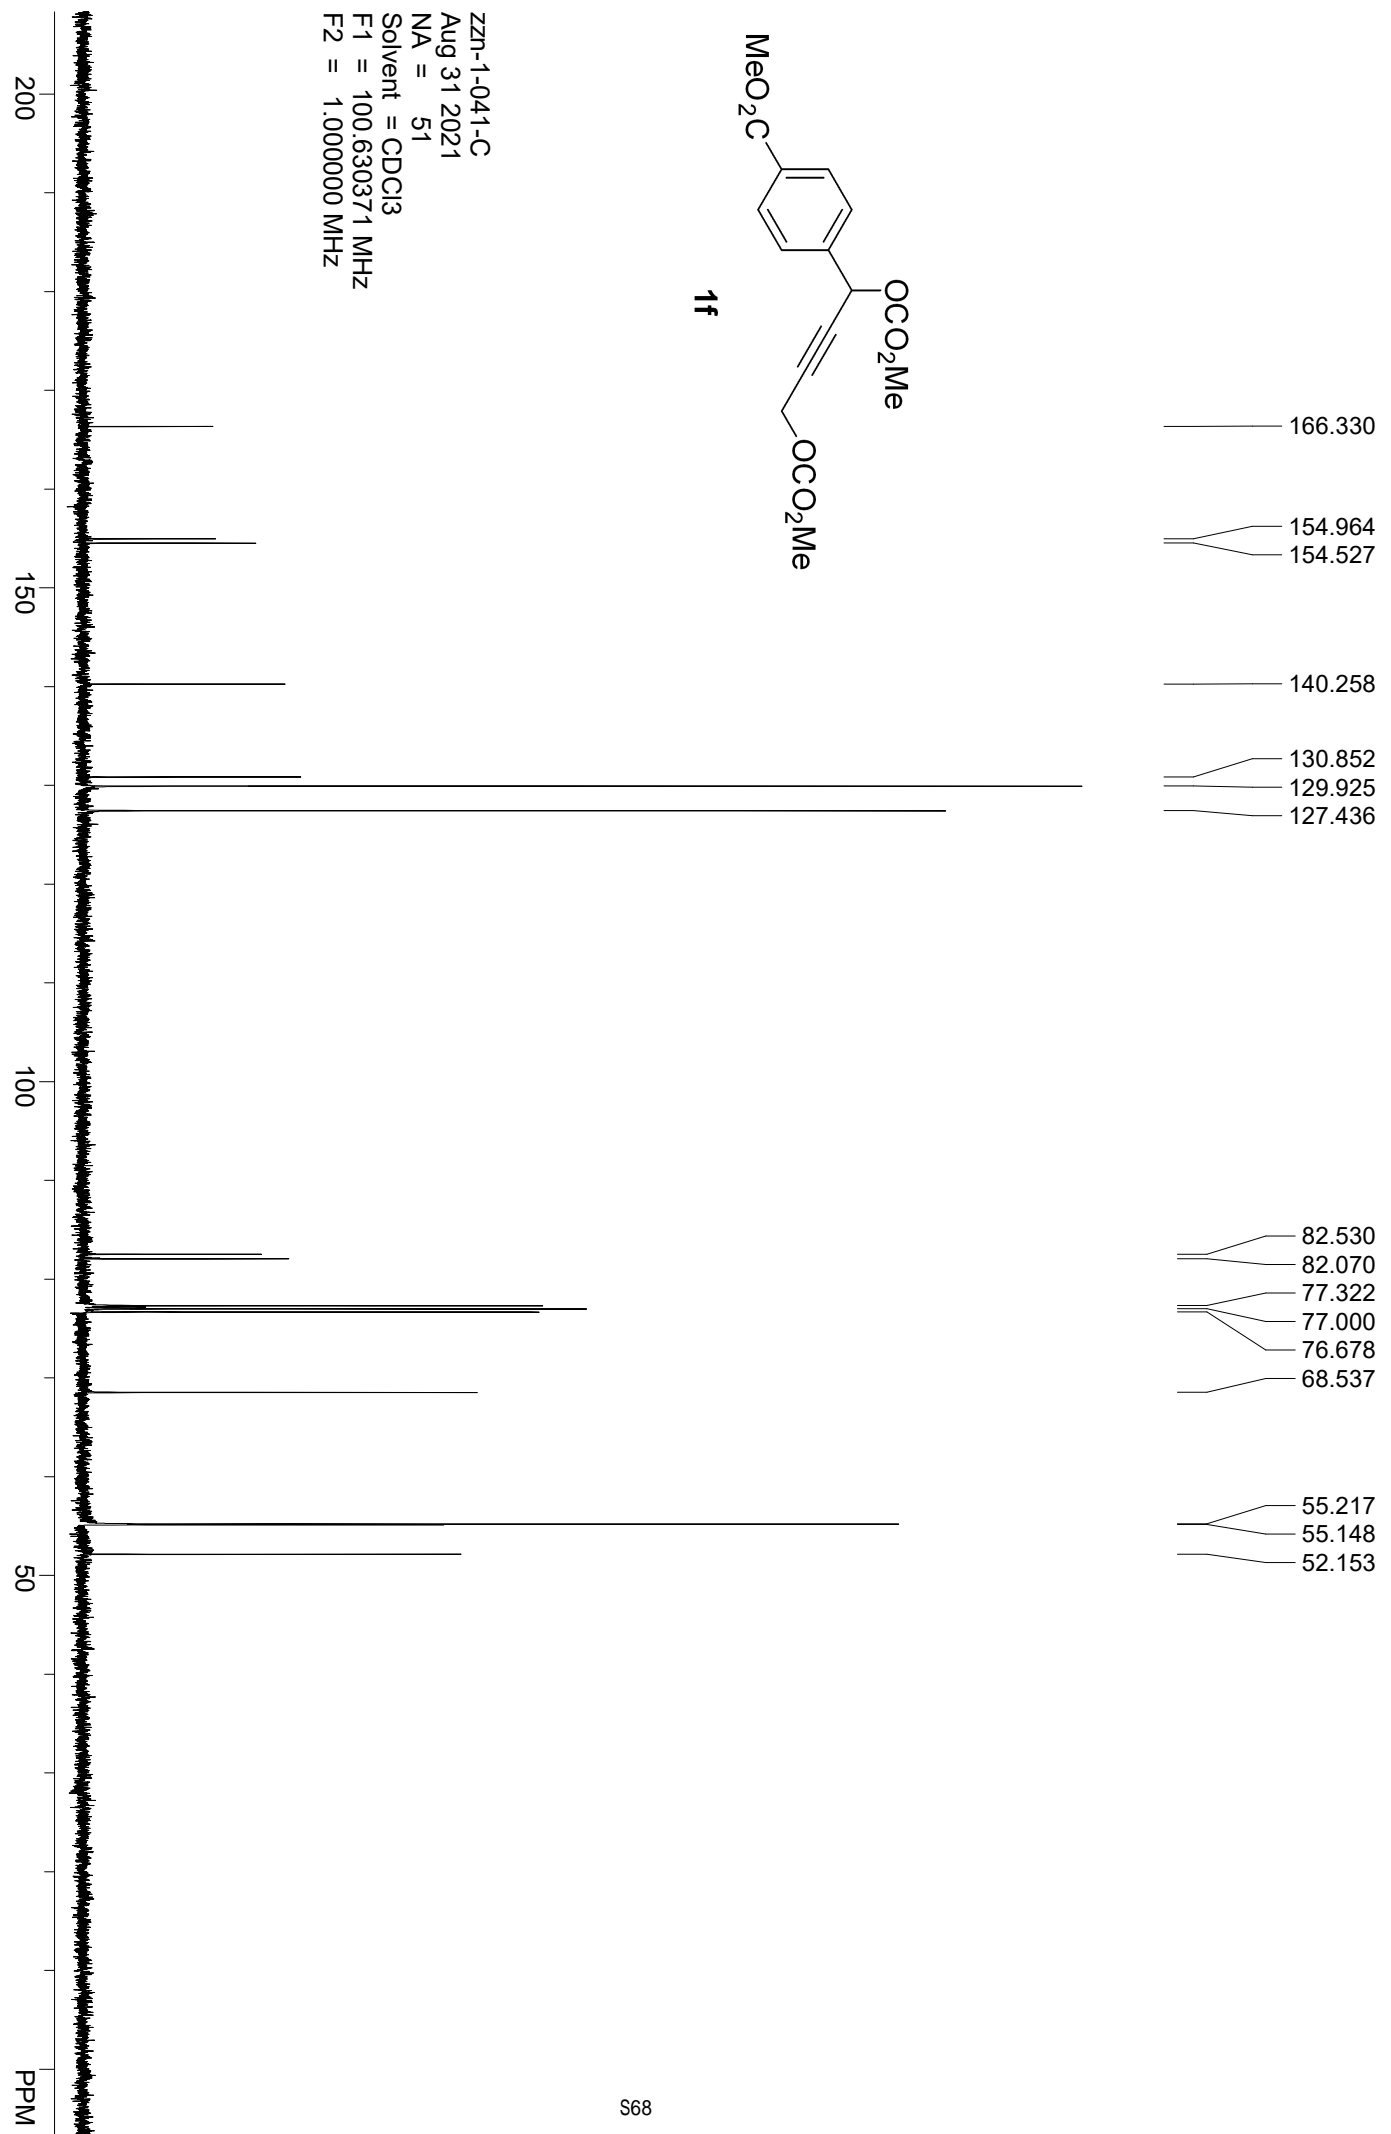

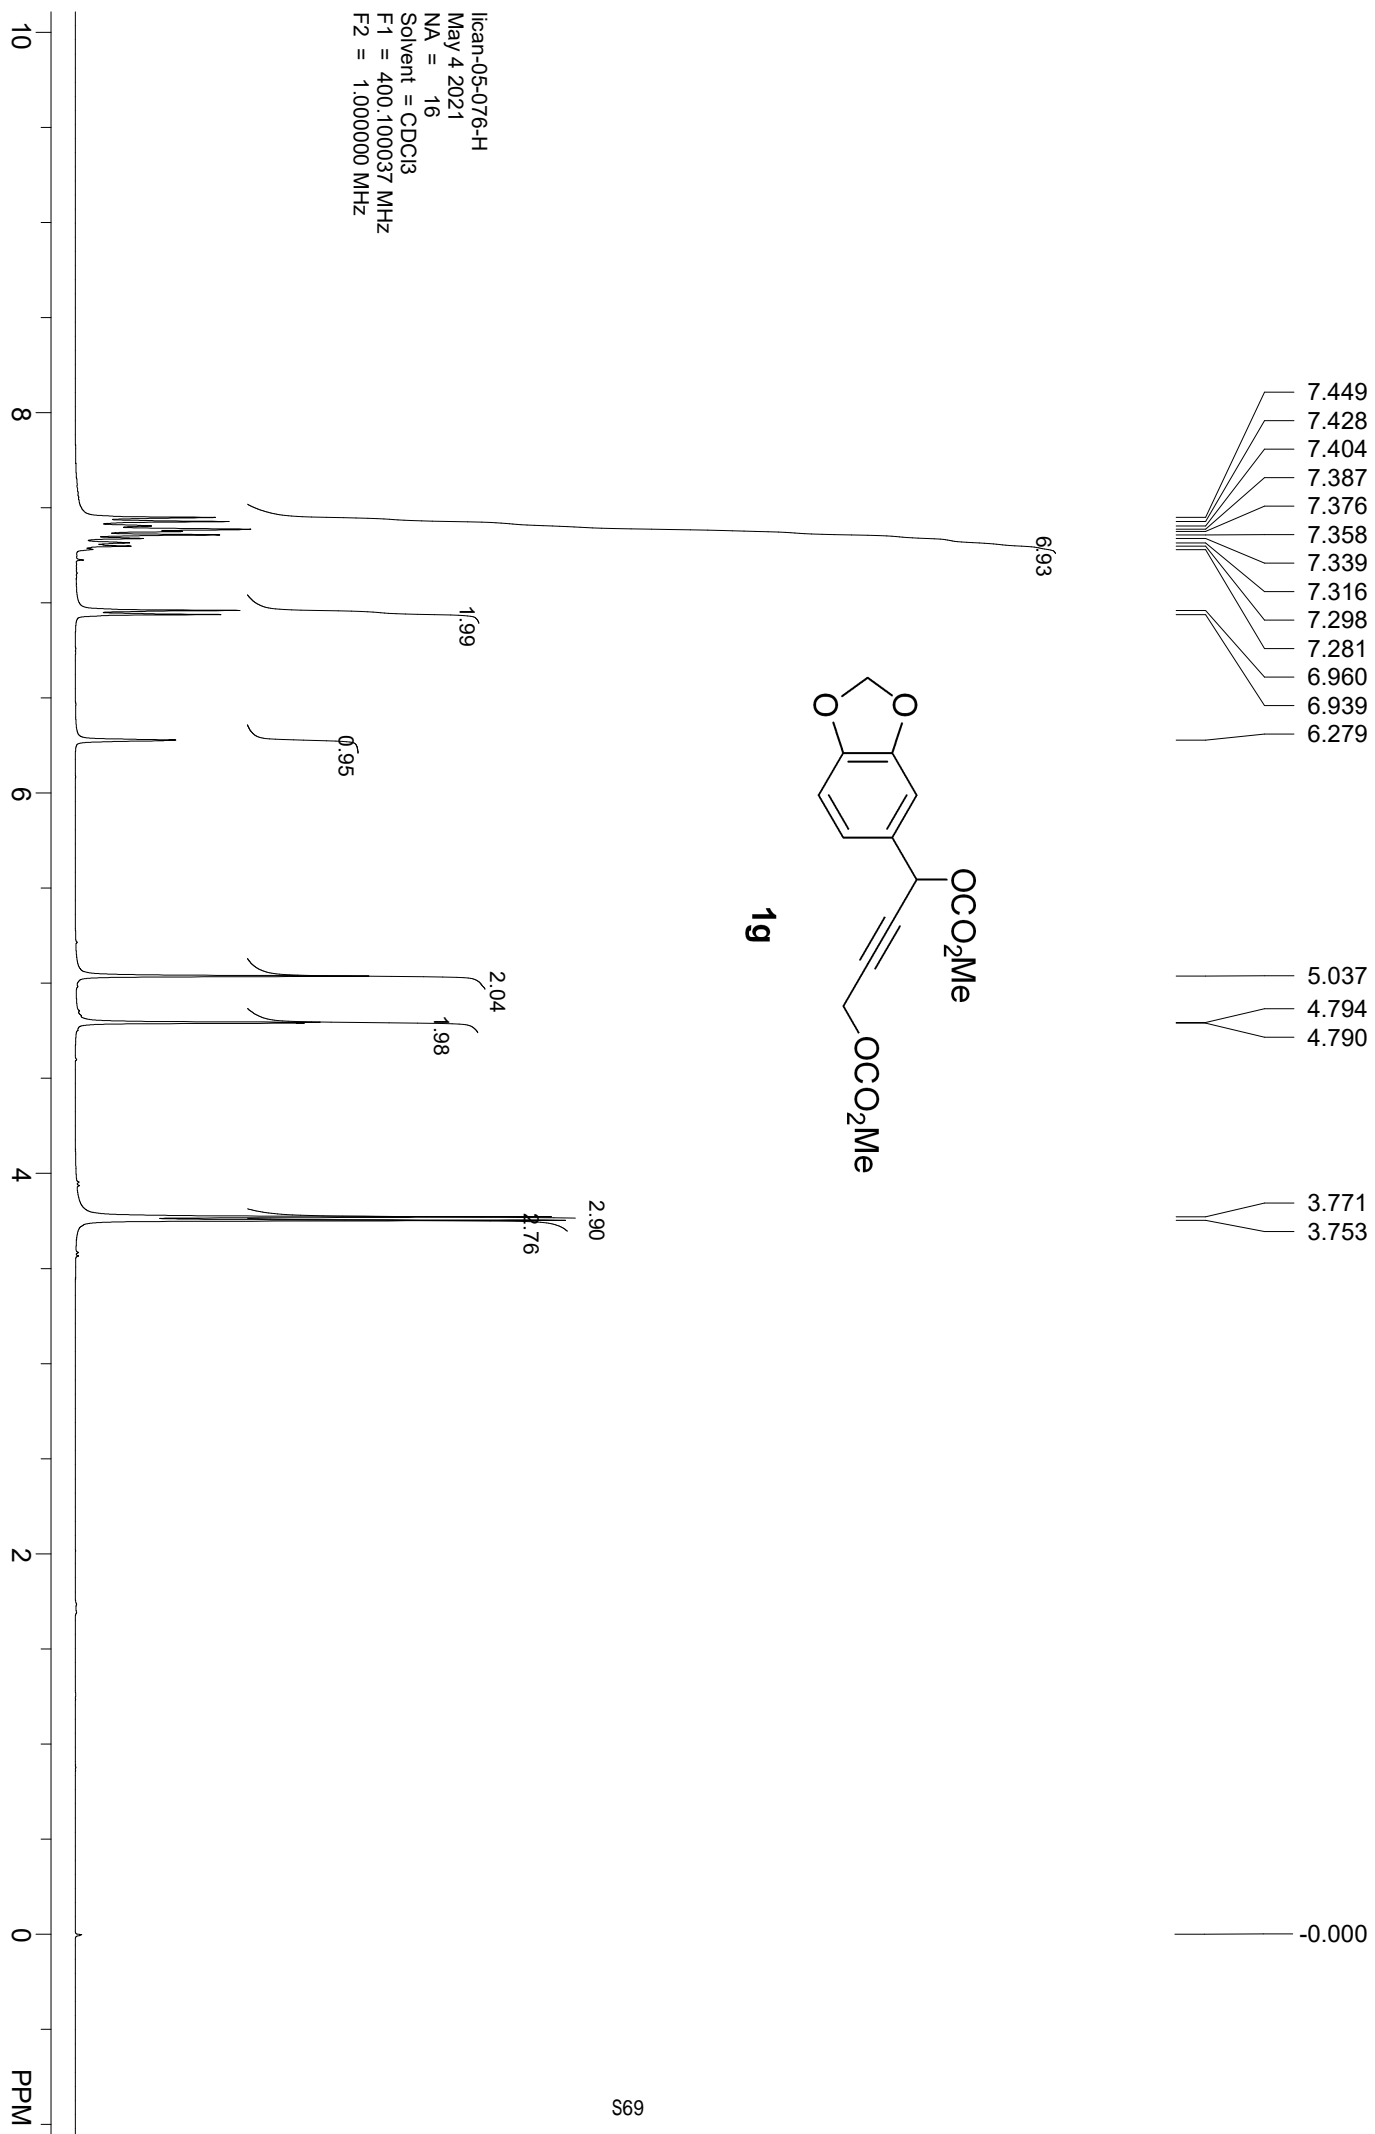

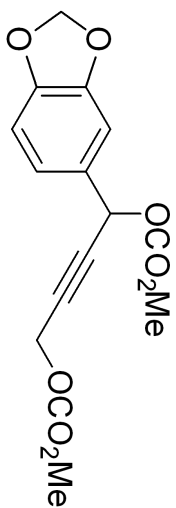

lican-05-076-C  
May 4 2021  
NA = 166  
Solvent = CDCl3  
F1 = 100.605225 MHz  
F2 = 1.000000 MHz

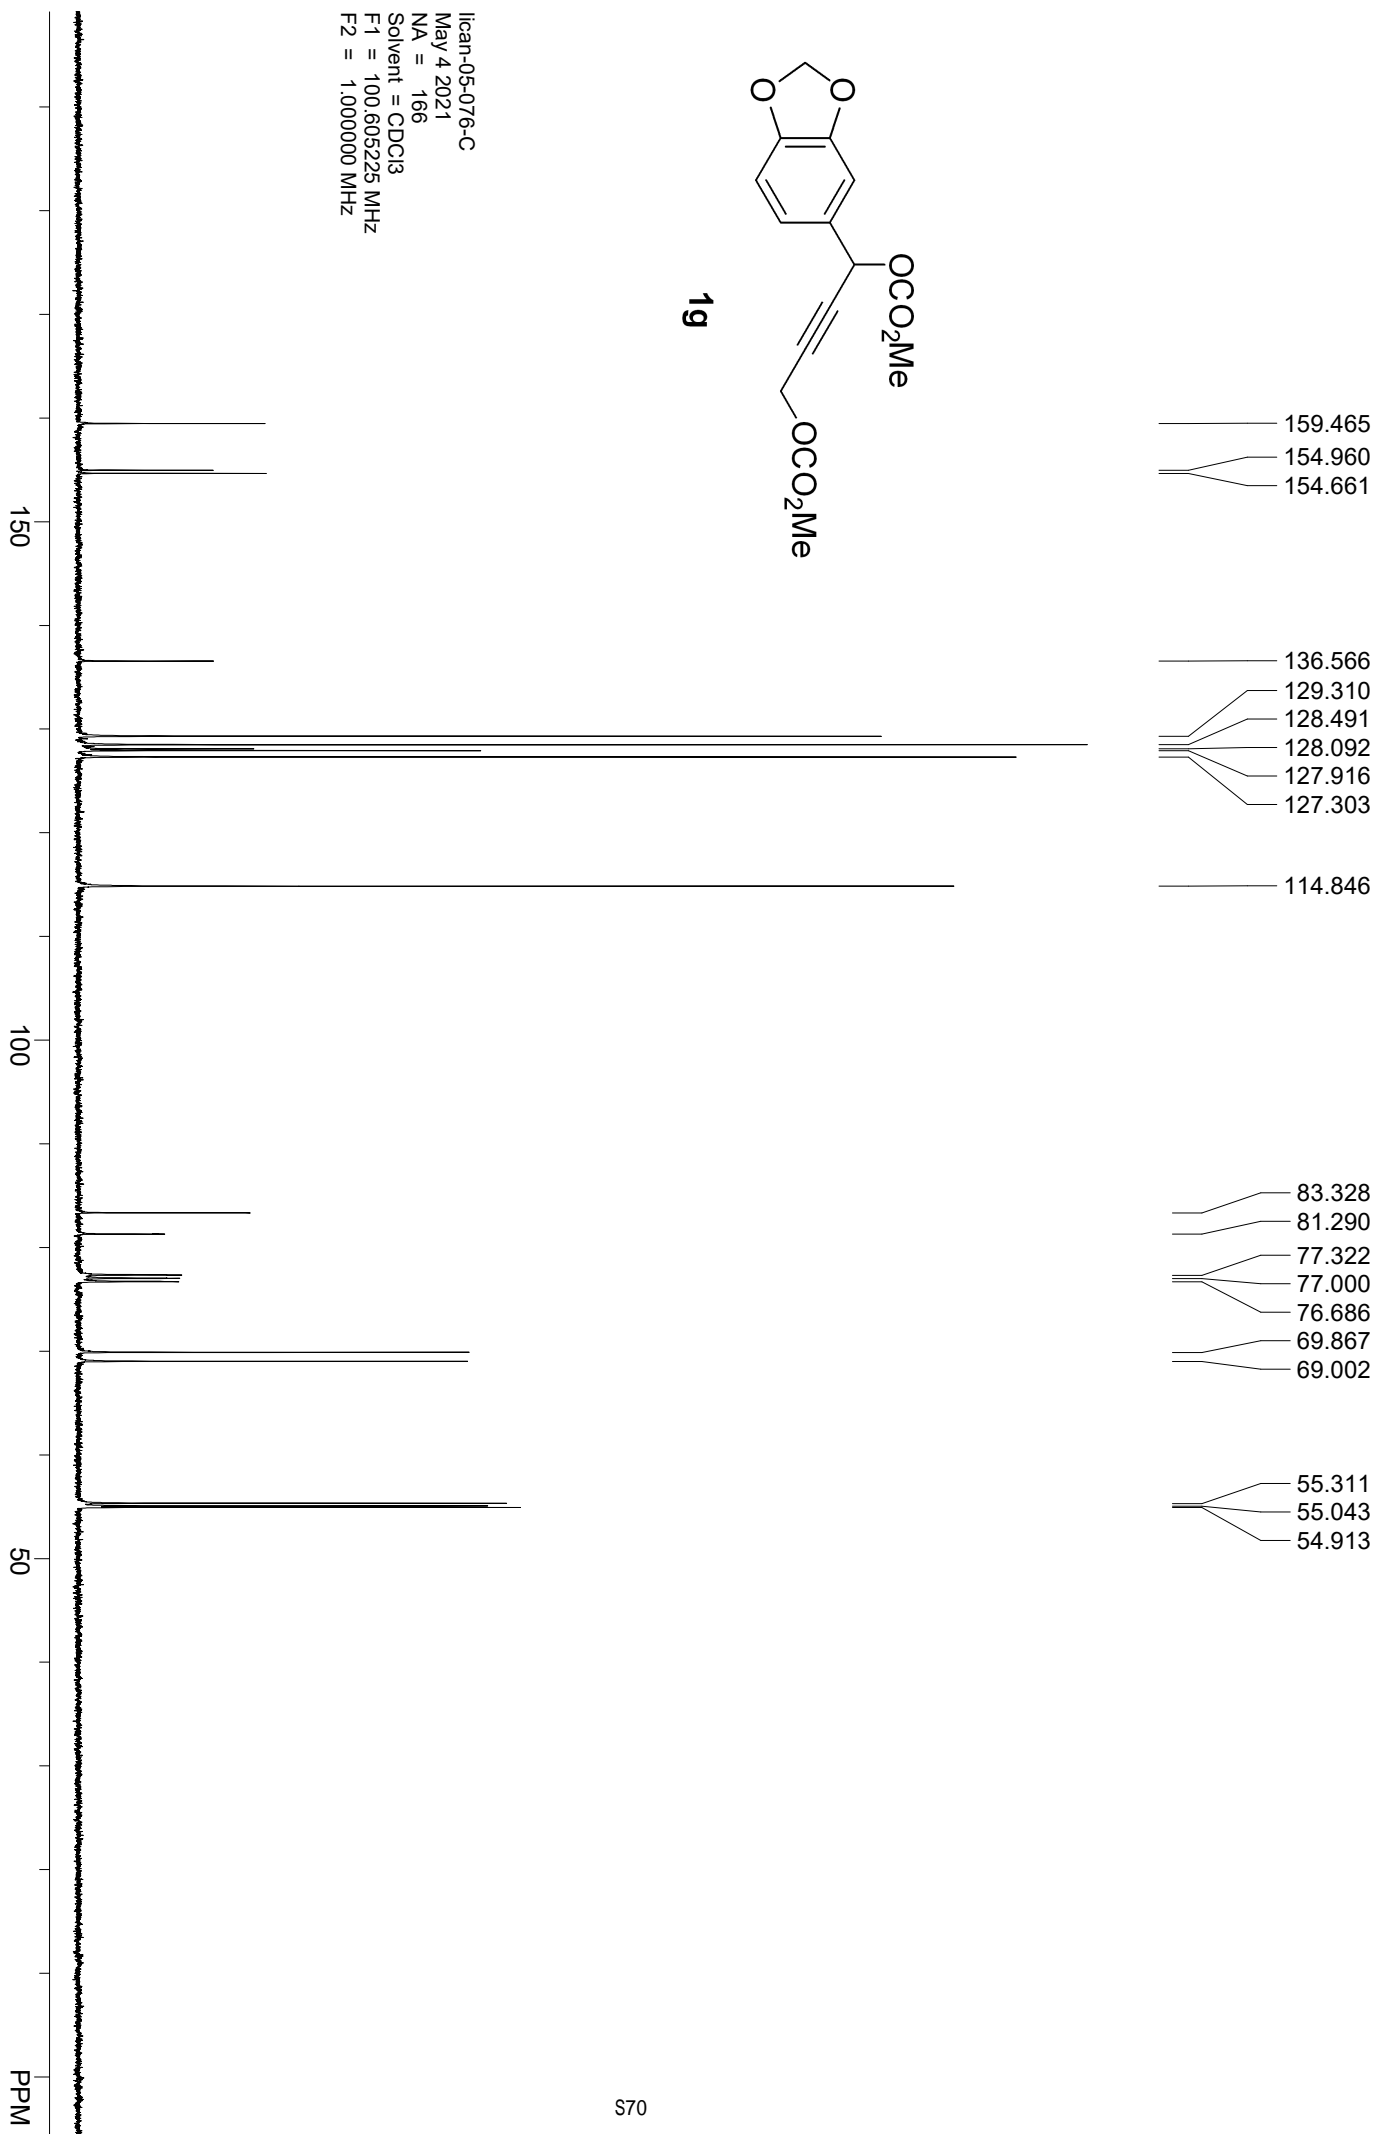

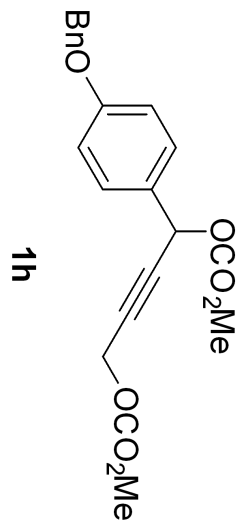

zzn-1-081-H  
 Oct 28 2021  
 NA = 4  
 Solvent = CDCl3  
 F1 = 400.031403 MHz  
 F2 = 100.596855 MHz

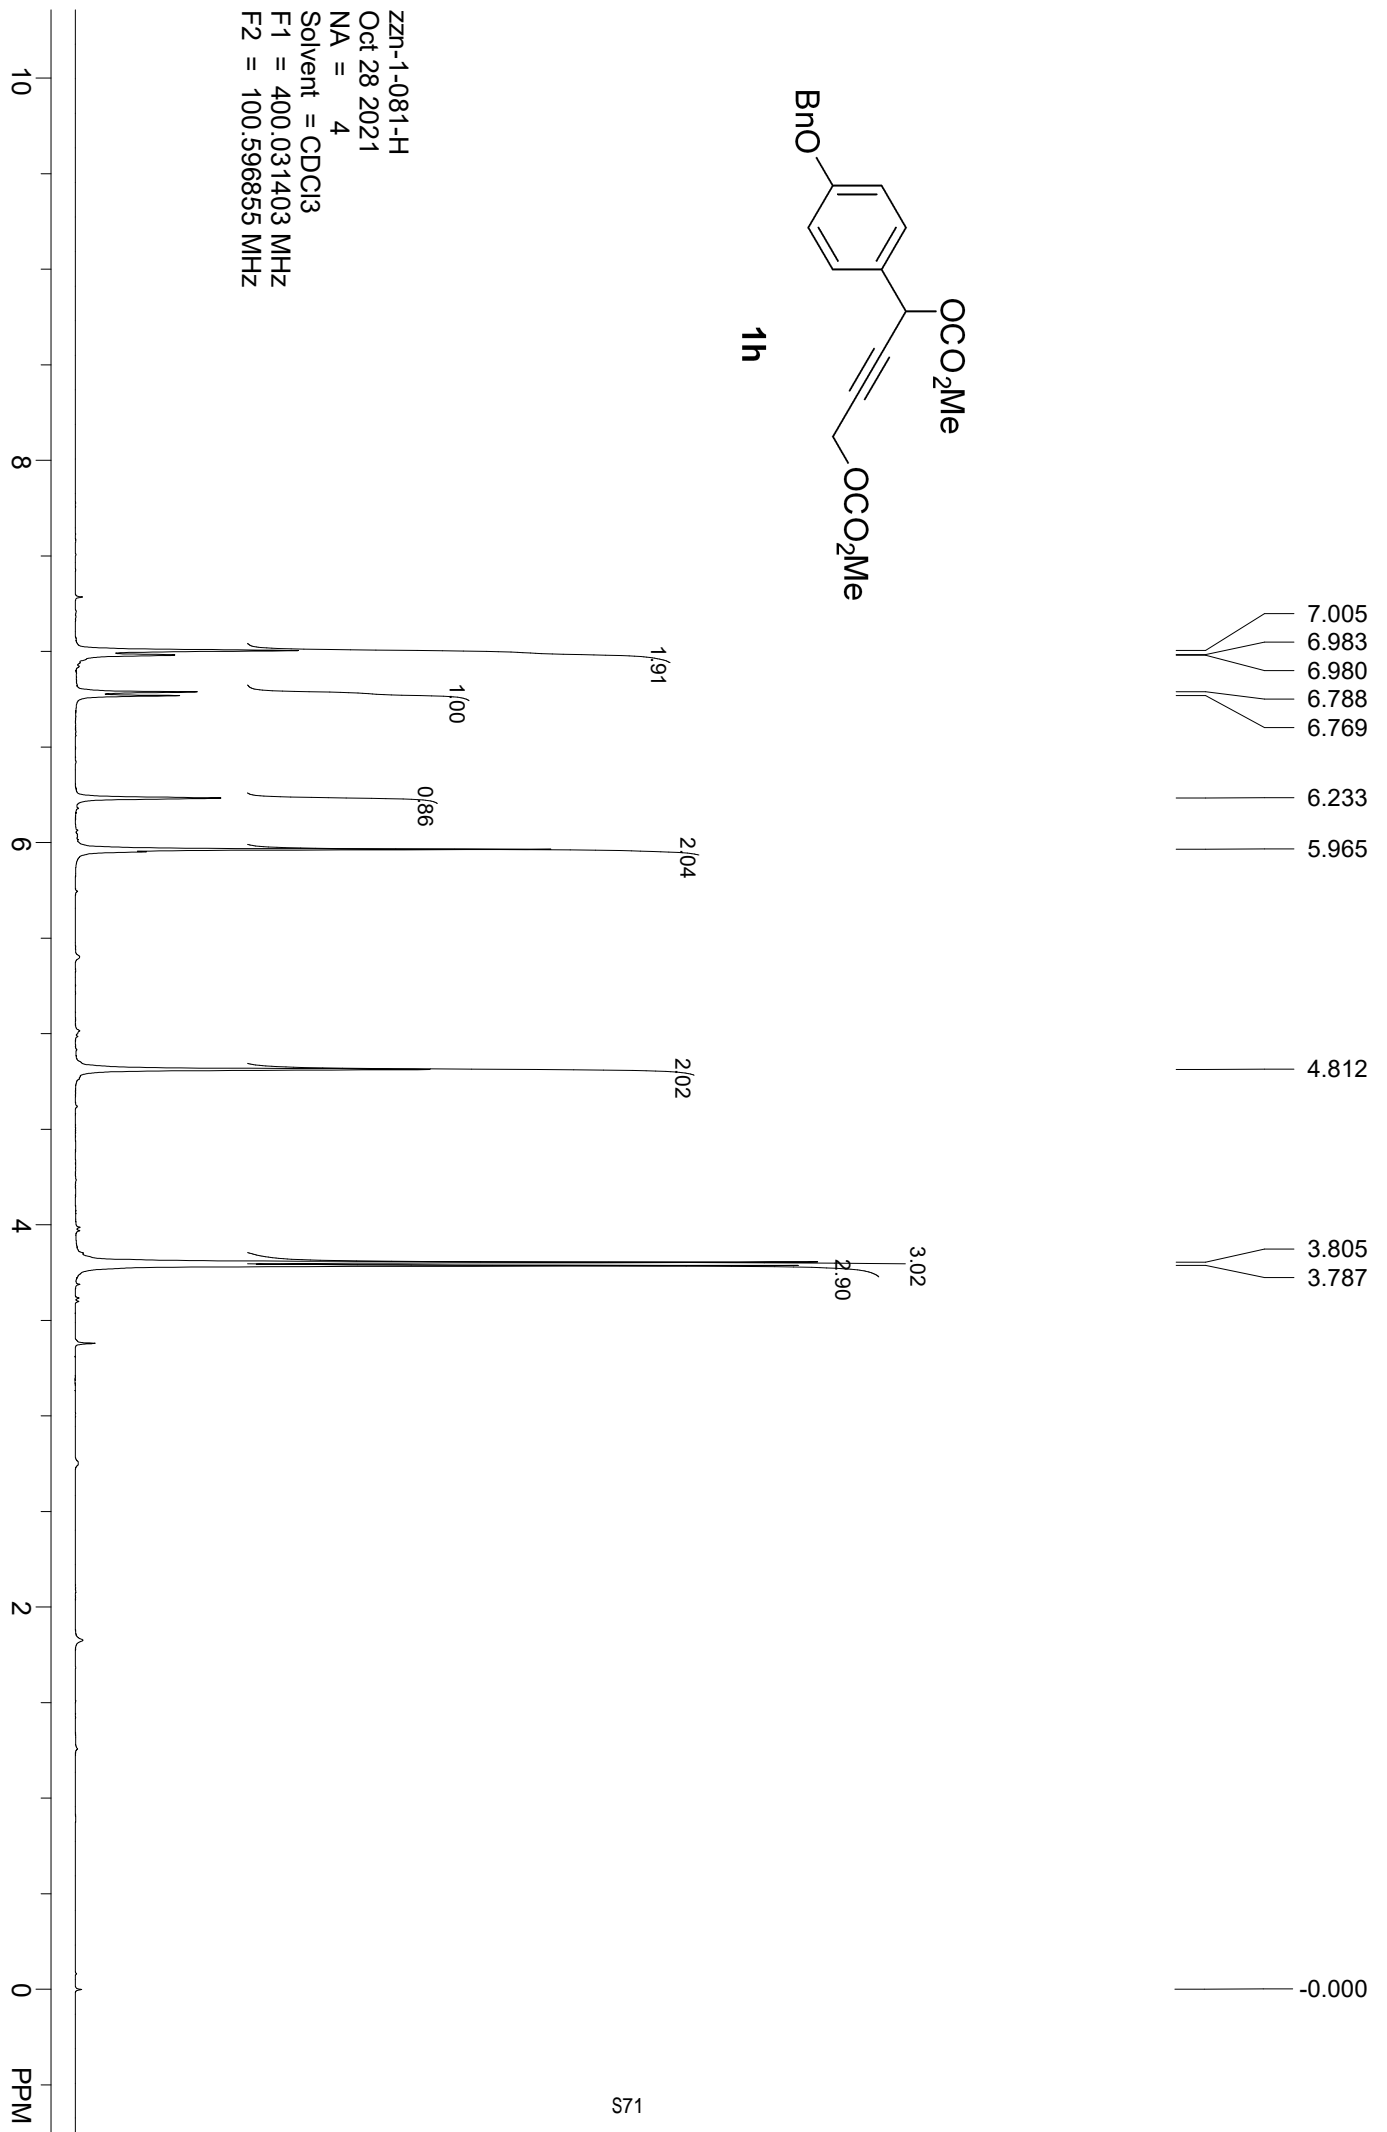

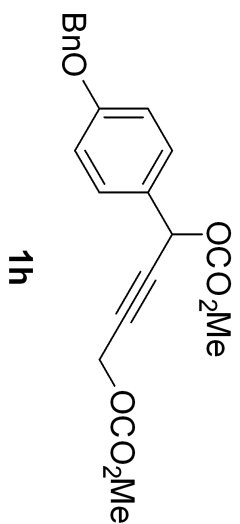

zzn-1-081-C  
 Nov 2 2021  
 NA = 24  
 Solvent = cdcl3  
 F1 = 100.598389 MHz  
 F2 = 400.030792 MHz

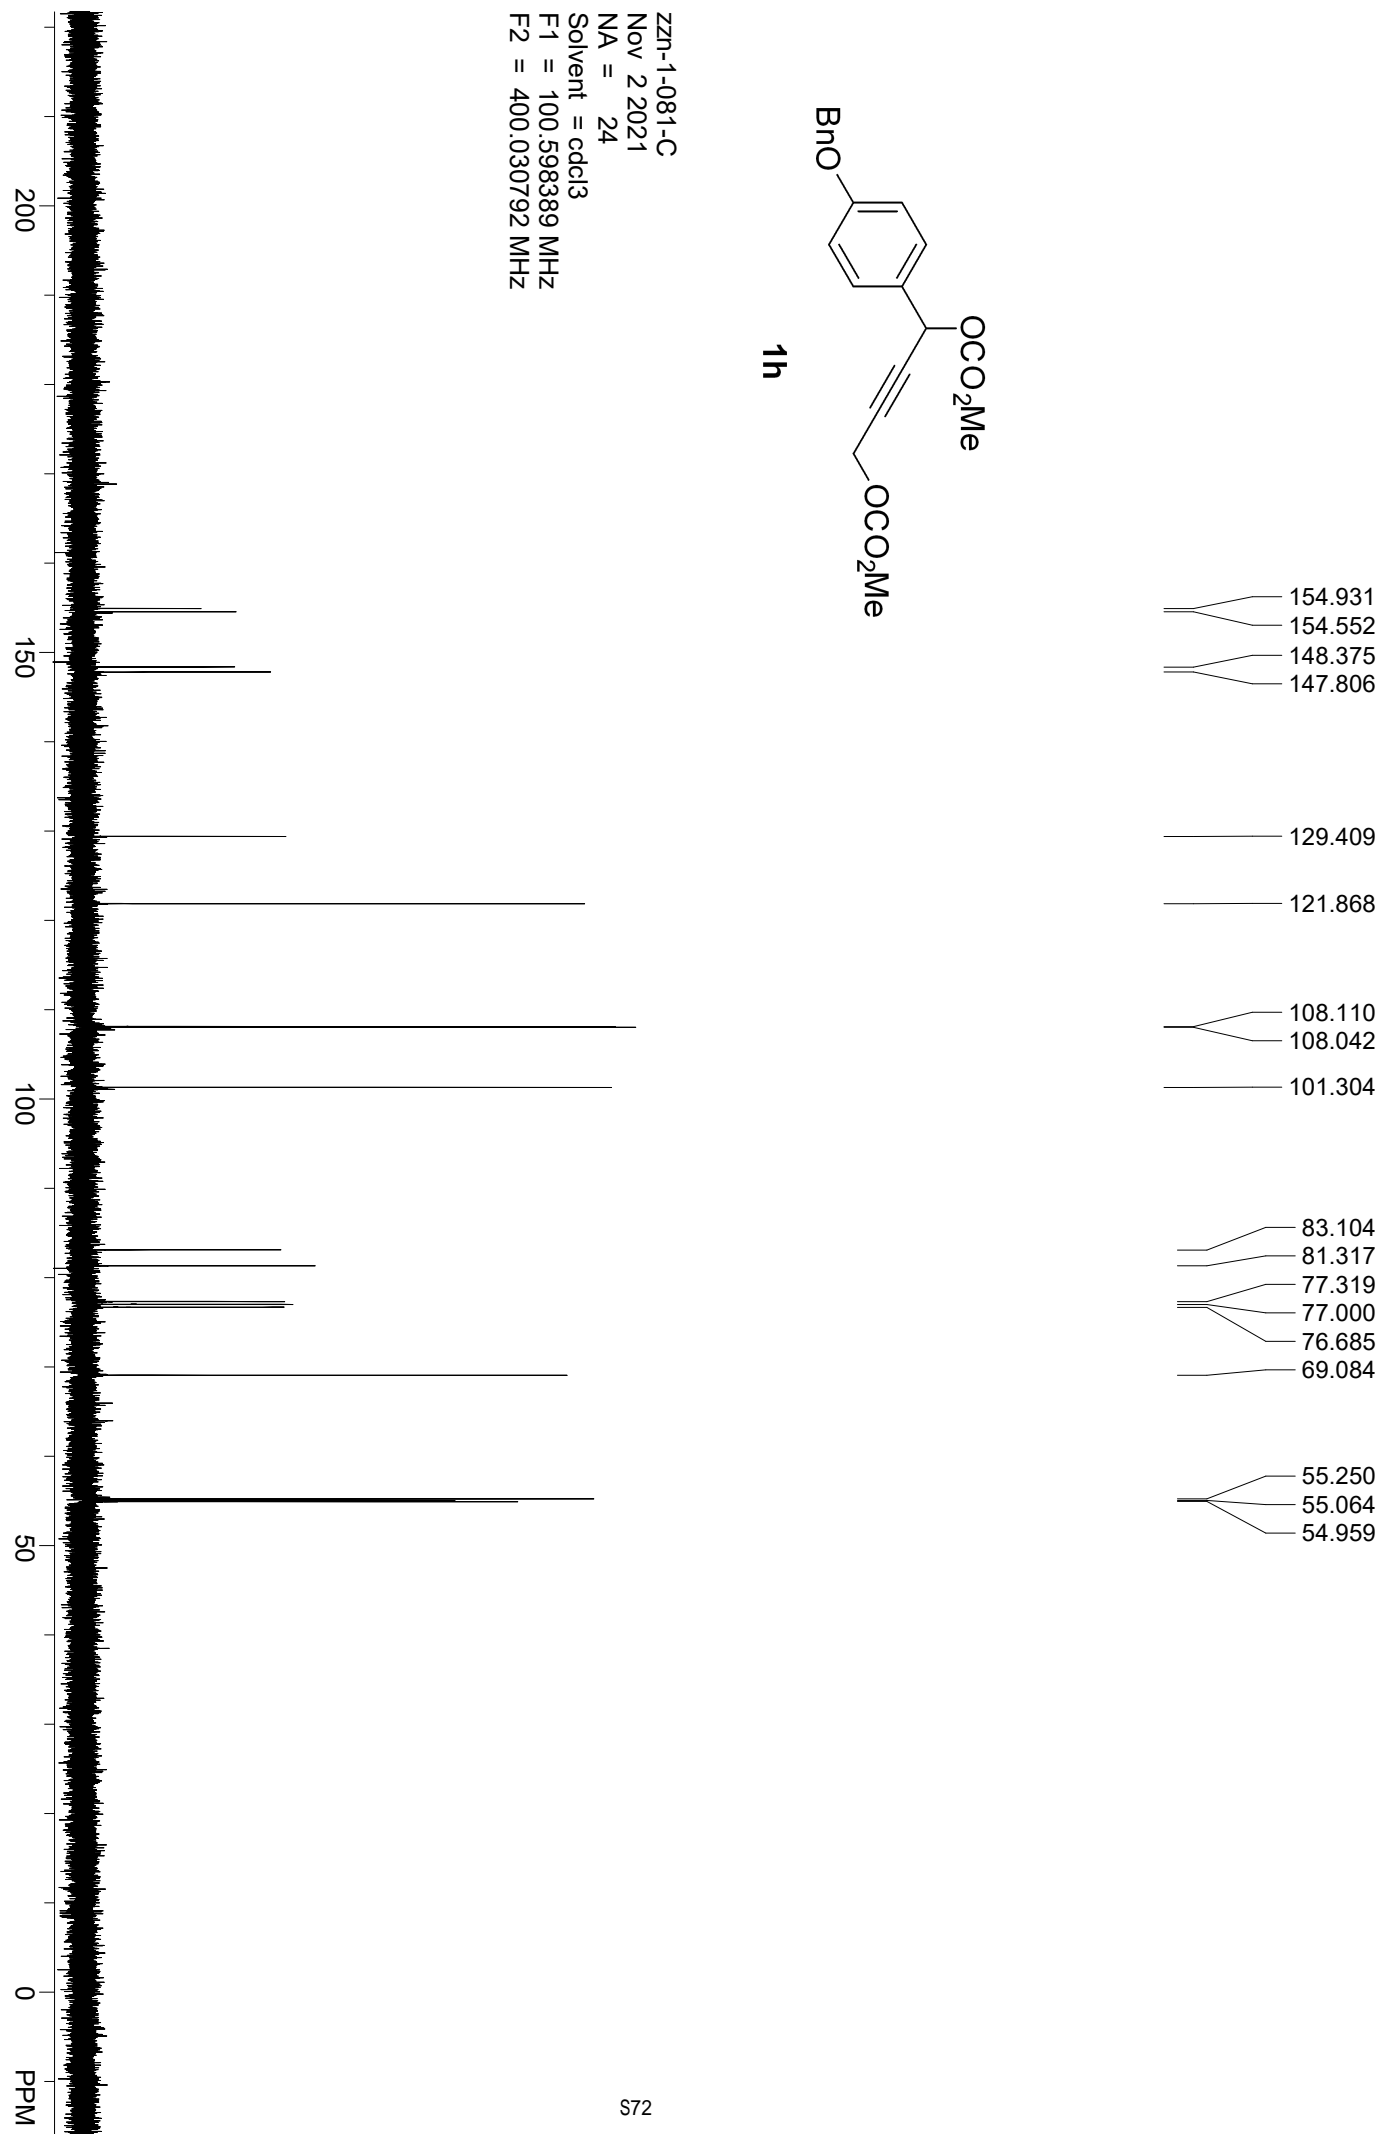



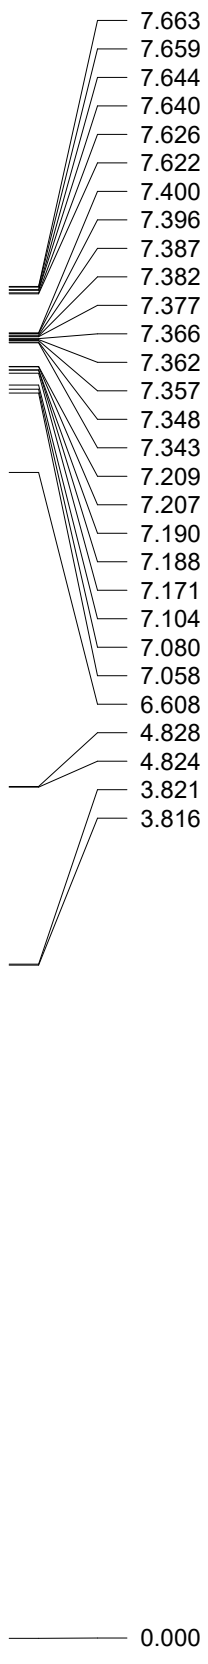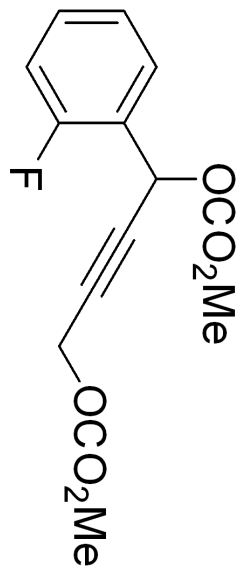

**1i**

zxn-1-013-H  
 Jul 6 2021  
 NA = 16  
 Solvent = CDCl3  
 F1 = 400.100006 MHz  
 F2 = 1.000000 MHz

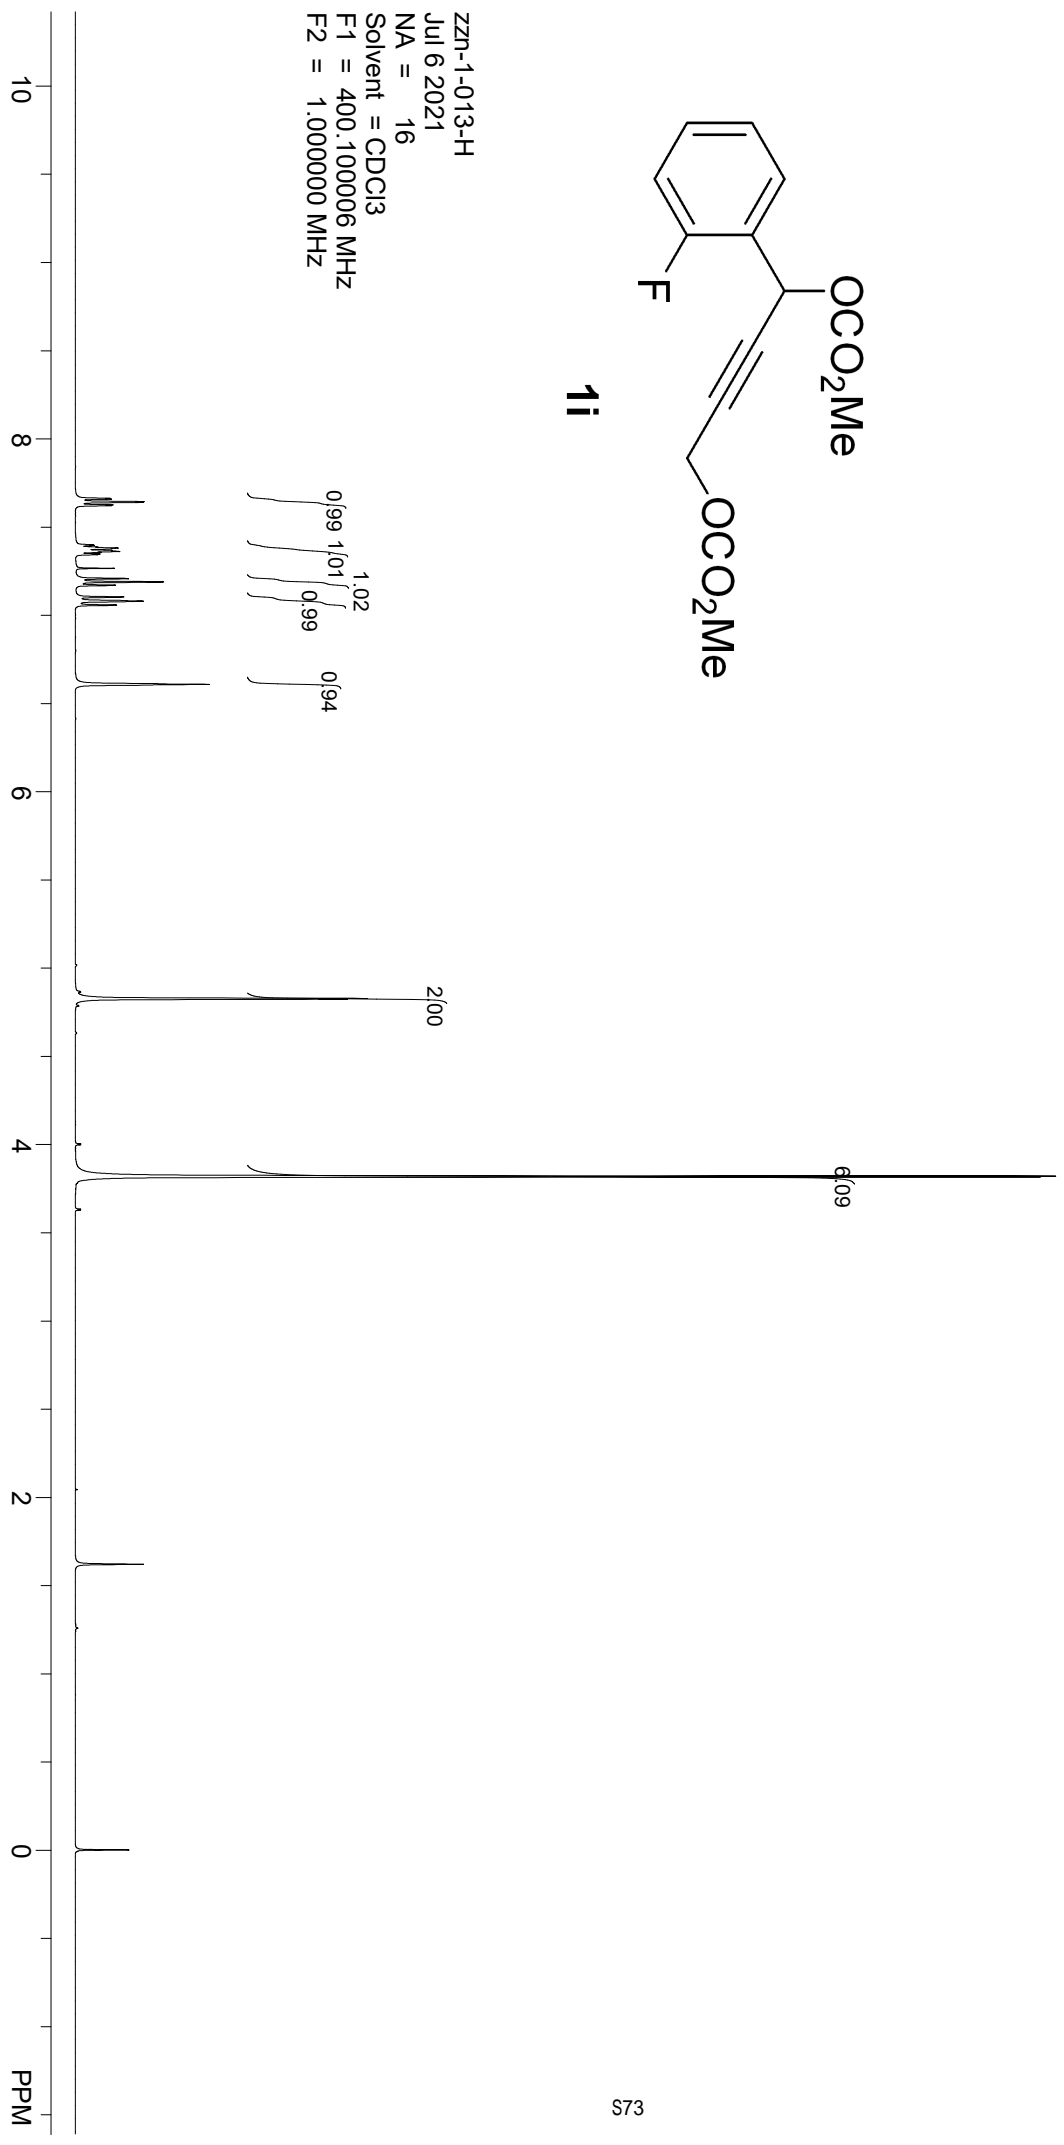

161.296  
158.806  
155.044  
154.477

131.356  
131.272  
129.502  
129.471  
124.438  
124.407  
123.120  
122.990  
115.819  
115.605

82.271  
81.558  
77.314  
77.000  
76.678

63.371  
63.317

55.350  
55.219  
55.196

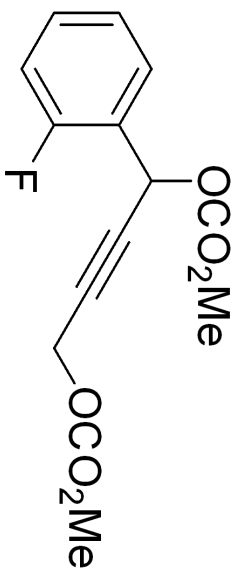

zzn-1-013-C  
Jul 6 2021  
NA = 1024  
Solvent = CDCl3  
F1 = 100.605225 MHz  
F2 = 1.000000 MHz

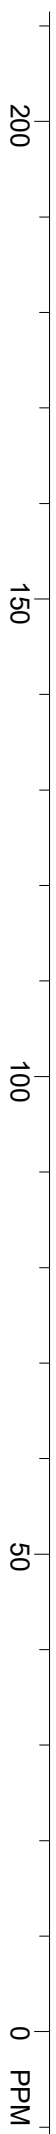

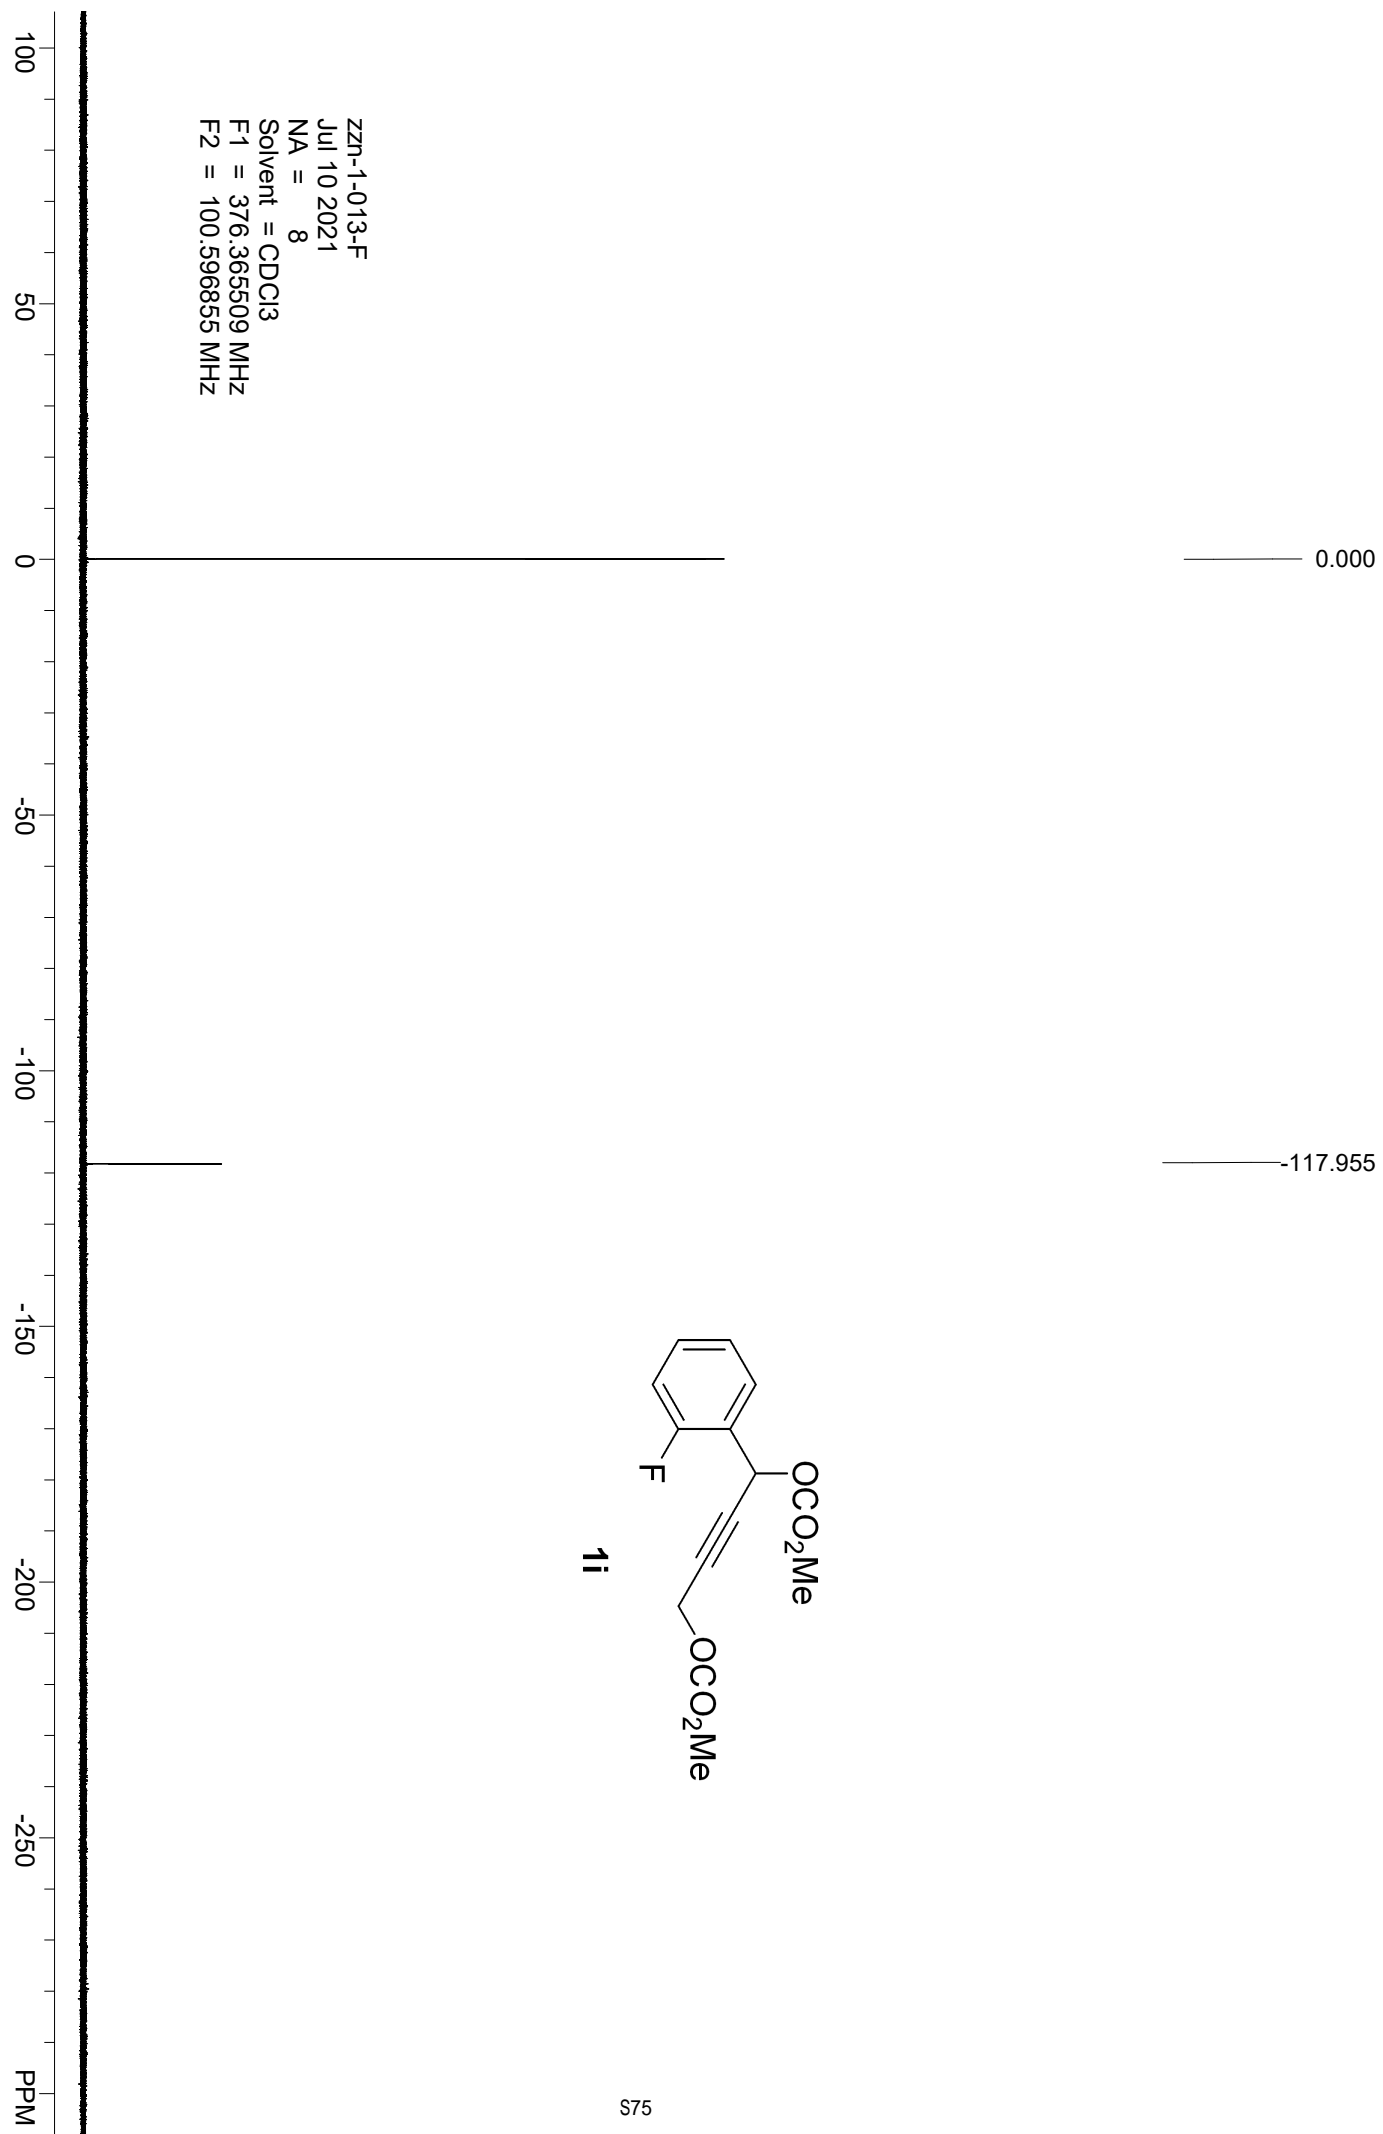

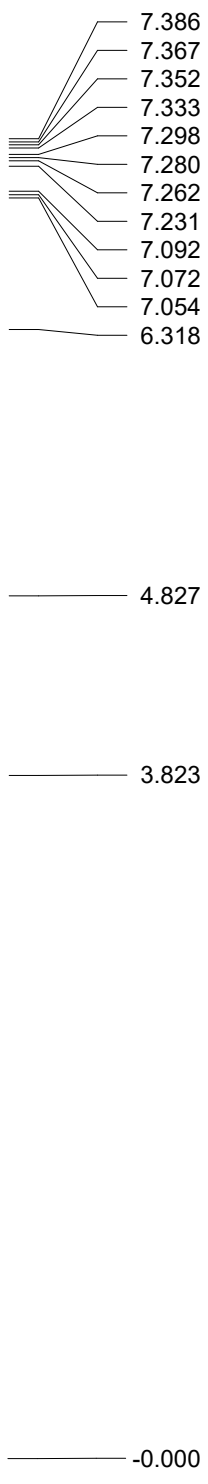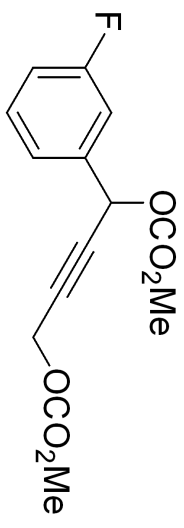

zzn-1-011-H  
 Jul 3 2021  
 NA = 4  
 Solvent = CDCl3  
 F1 = 399.723236 MHz  
 F2 = 100.519203 MHz

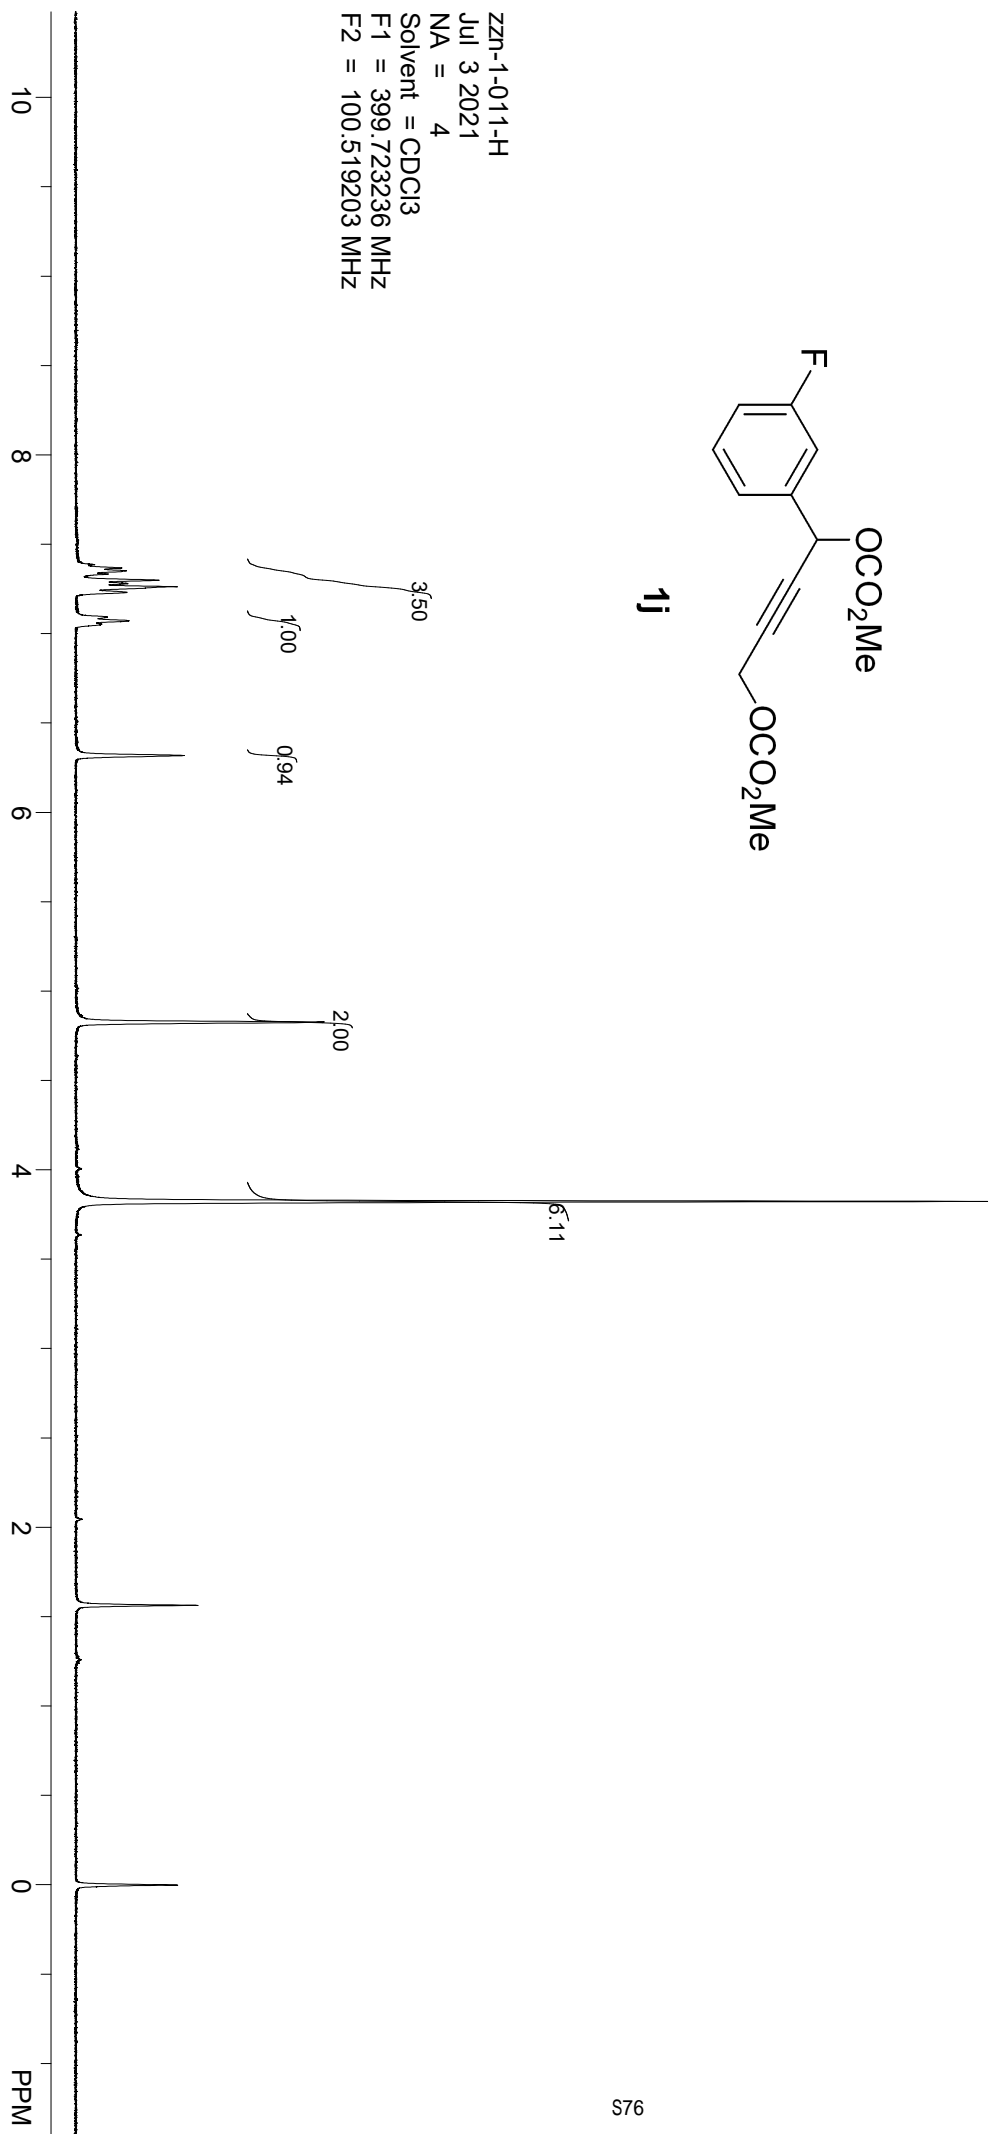

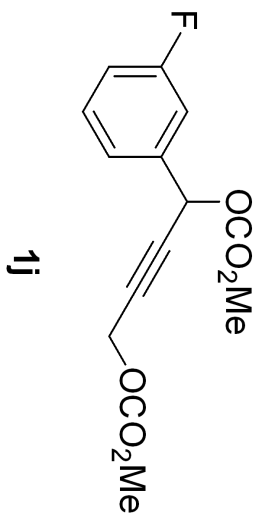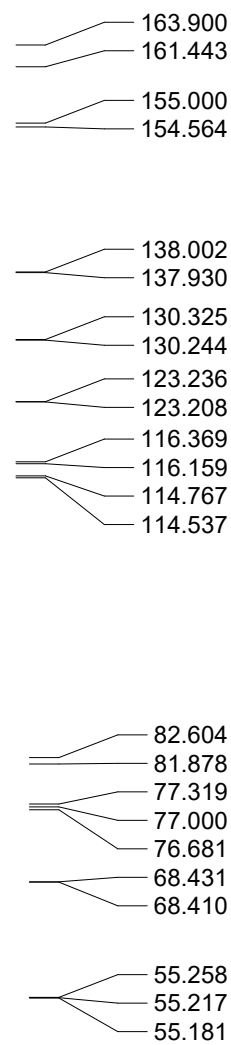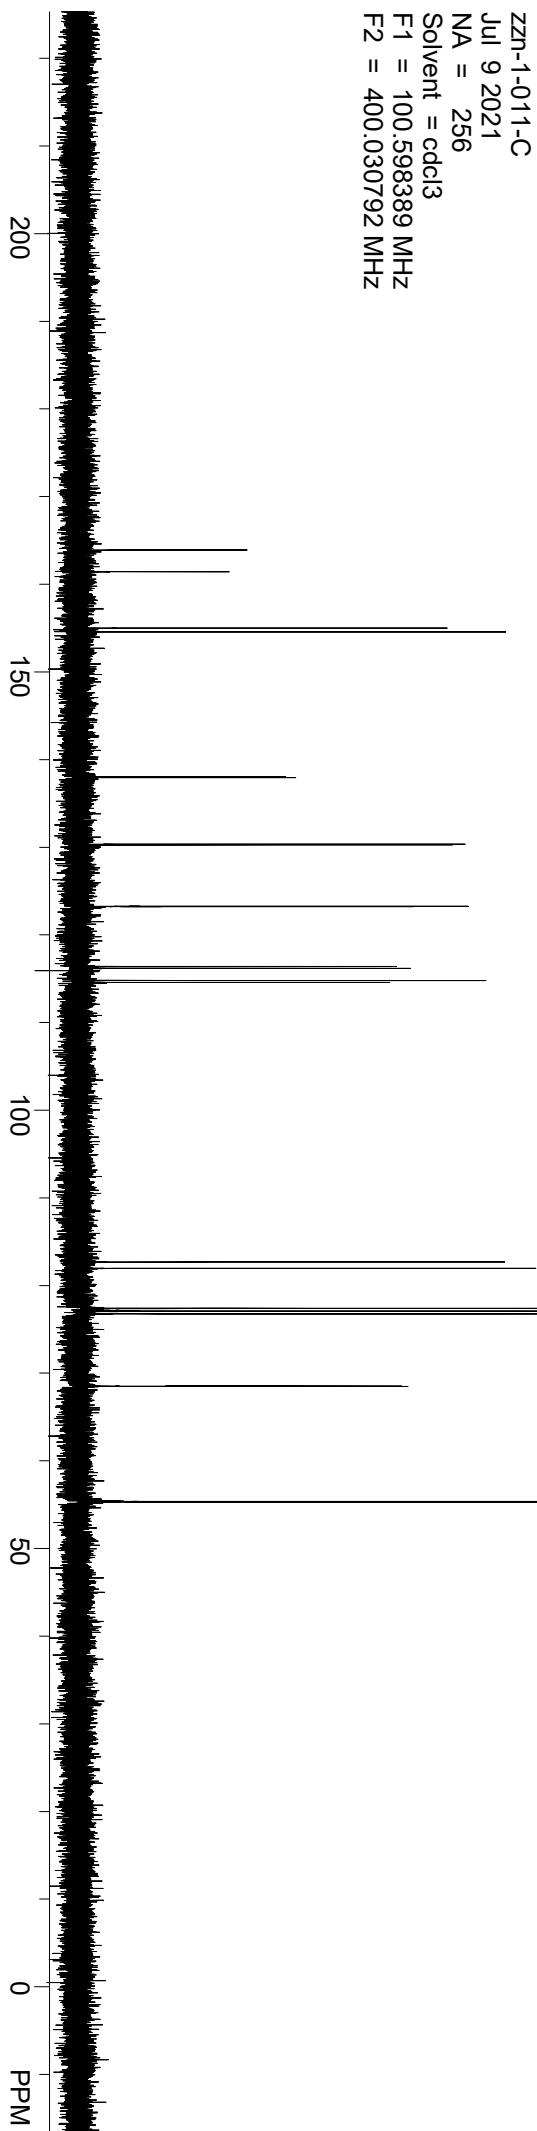

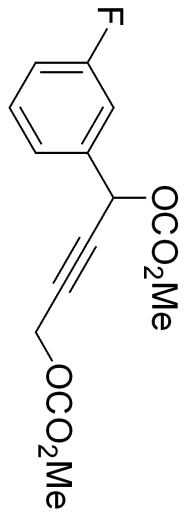

zxn-1-011-F  
Jul 10 2021  
NA = 4  
Solvent = CDCl3  
F1 = 376.365509 MHz  
F2 = 100.596855 MHz

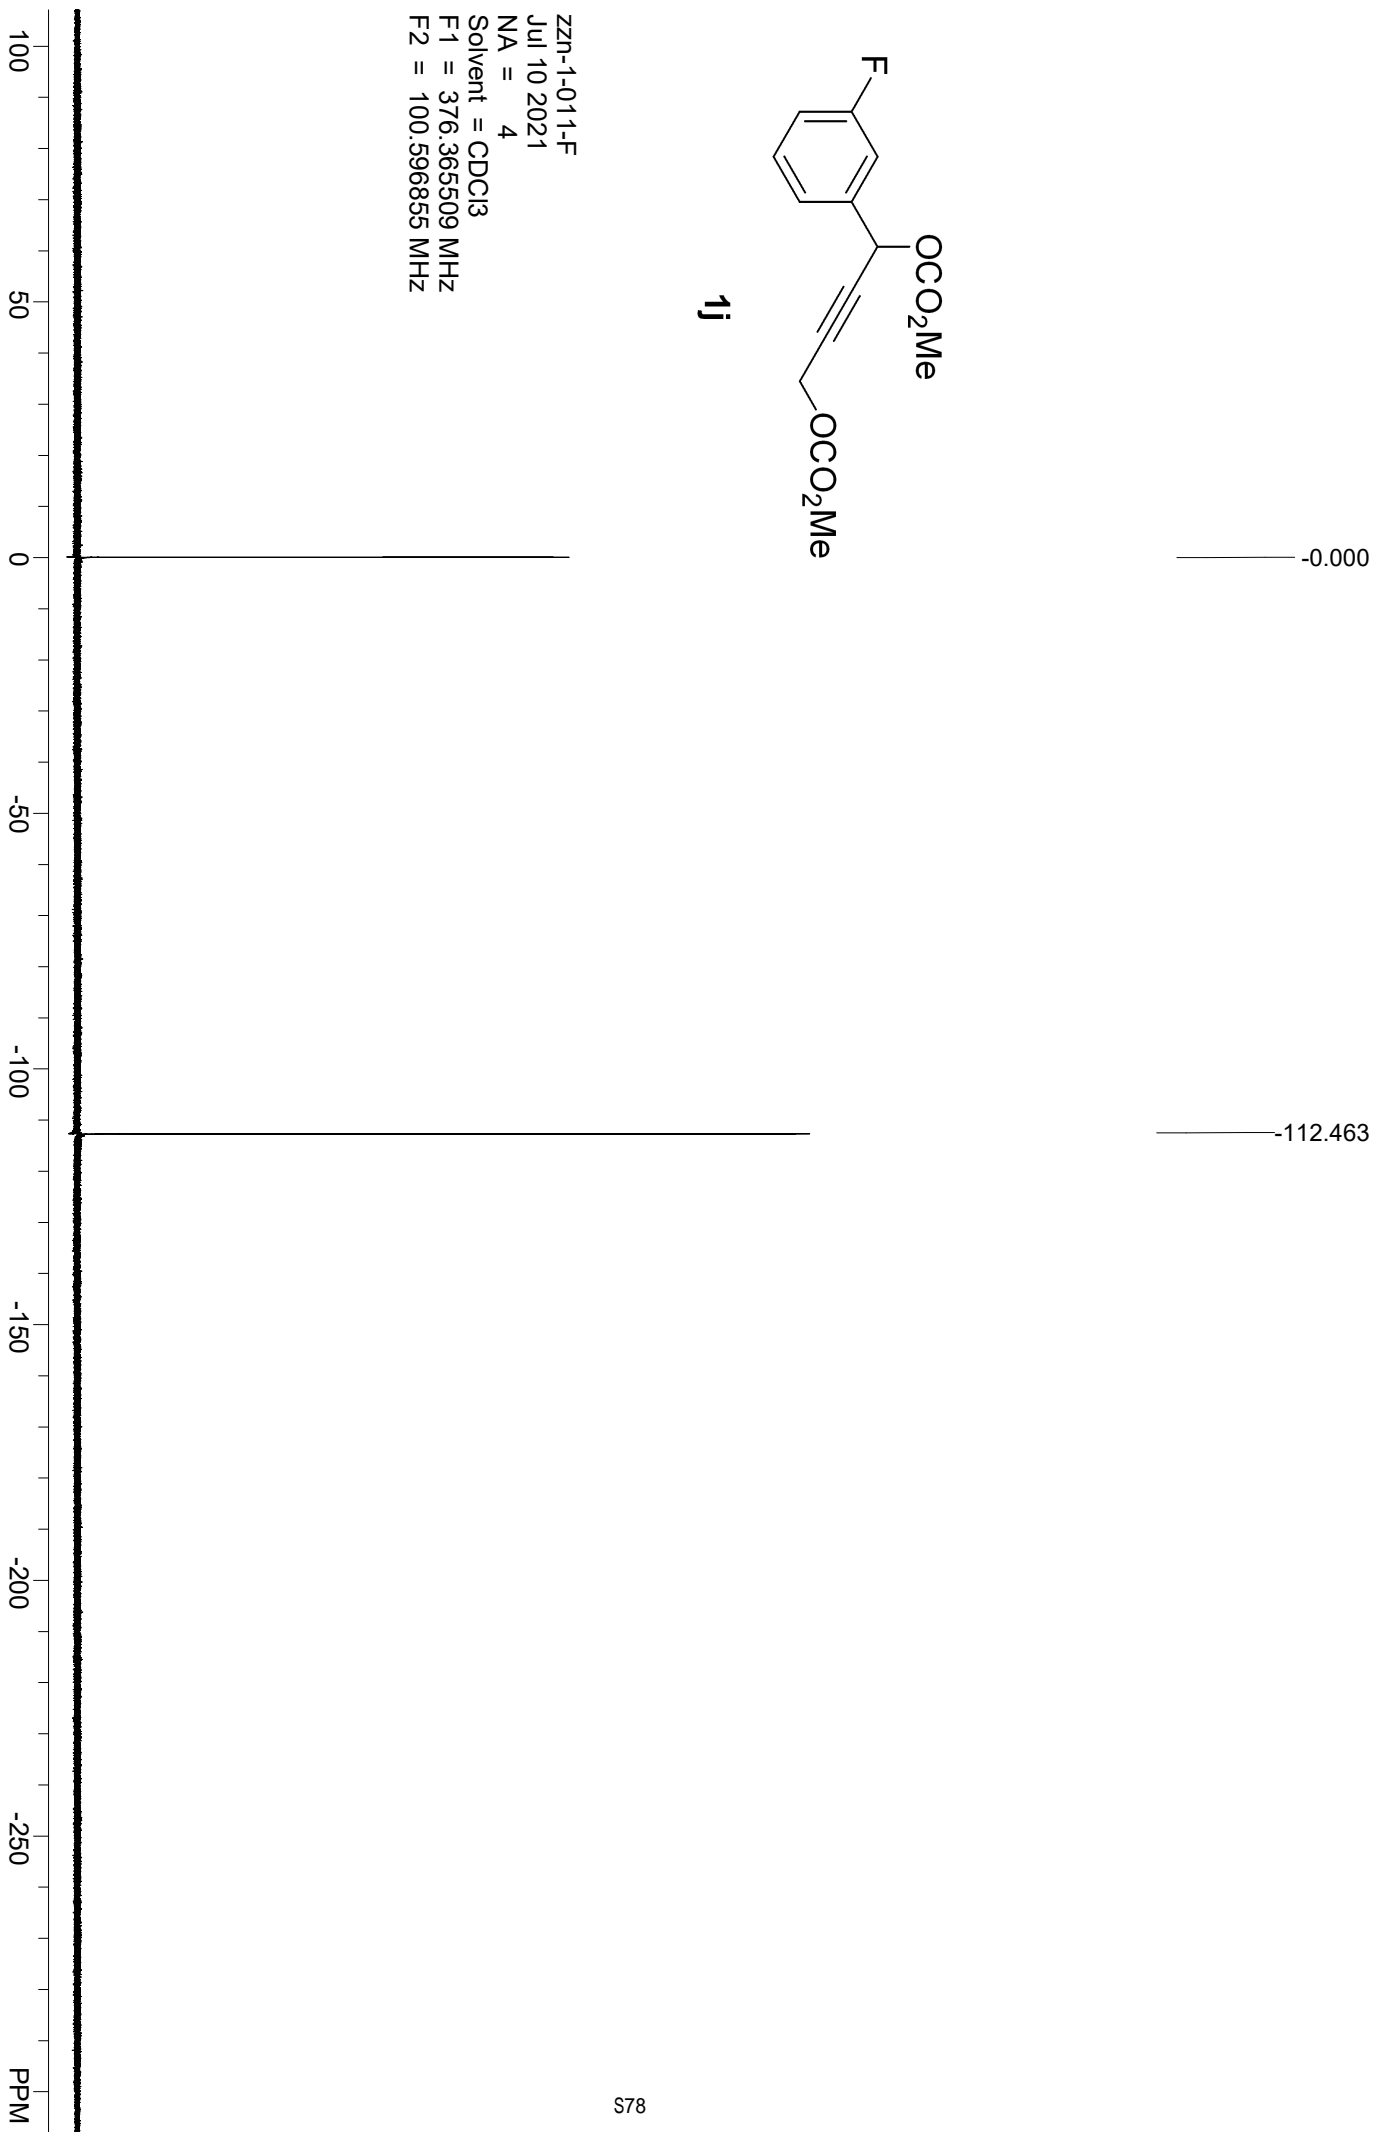

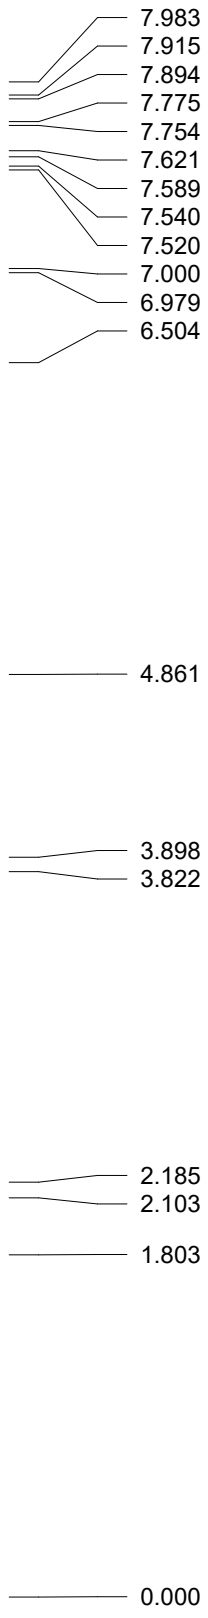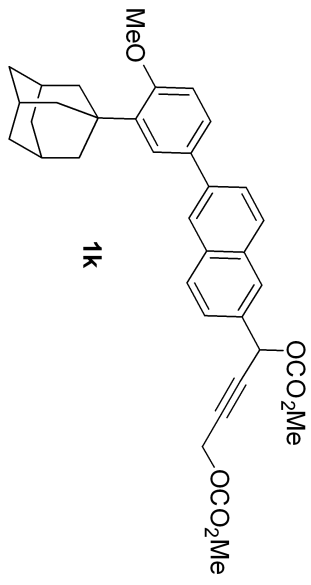

zZn-1-065-H  
Sep 29 2021  
NA = 8  
Solvent = CDCl<sub>3</sub>  
F1 = 400.031616 MHz  
F2 = 100.596855 MHz

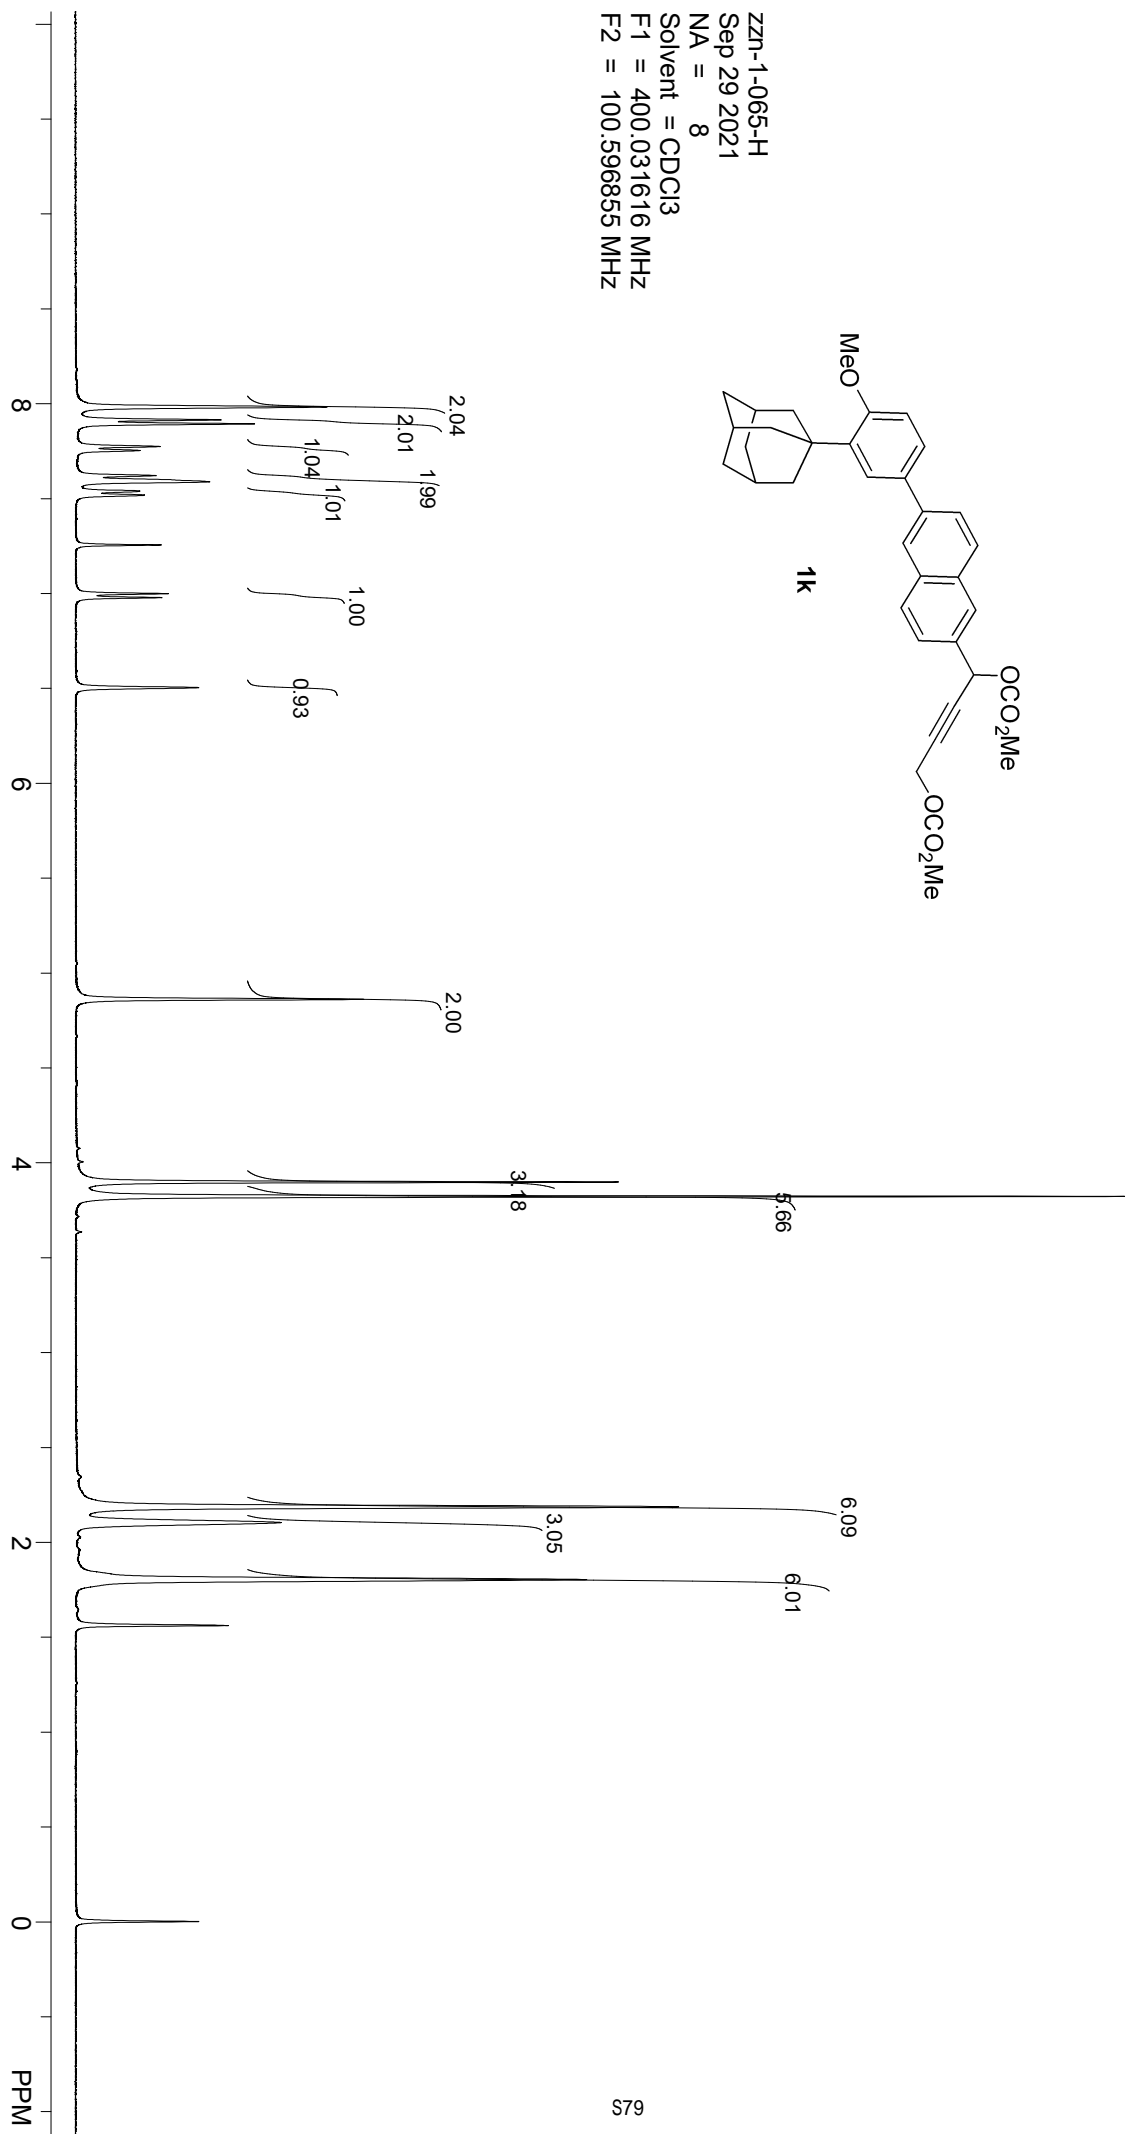

zzn-1-065-C  
Oct 5 2021  
NA = 1024  
Solvent = CDCl3  
F1 = 100.605225 MHz  
F2 = 1.000000 MHz

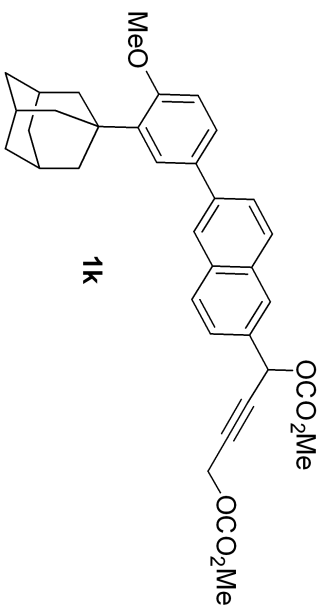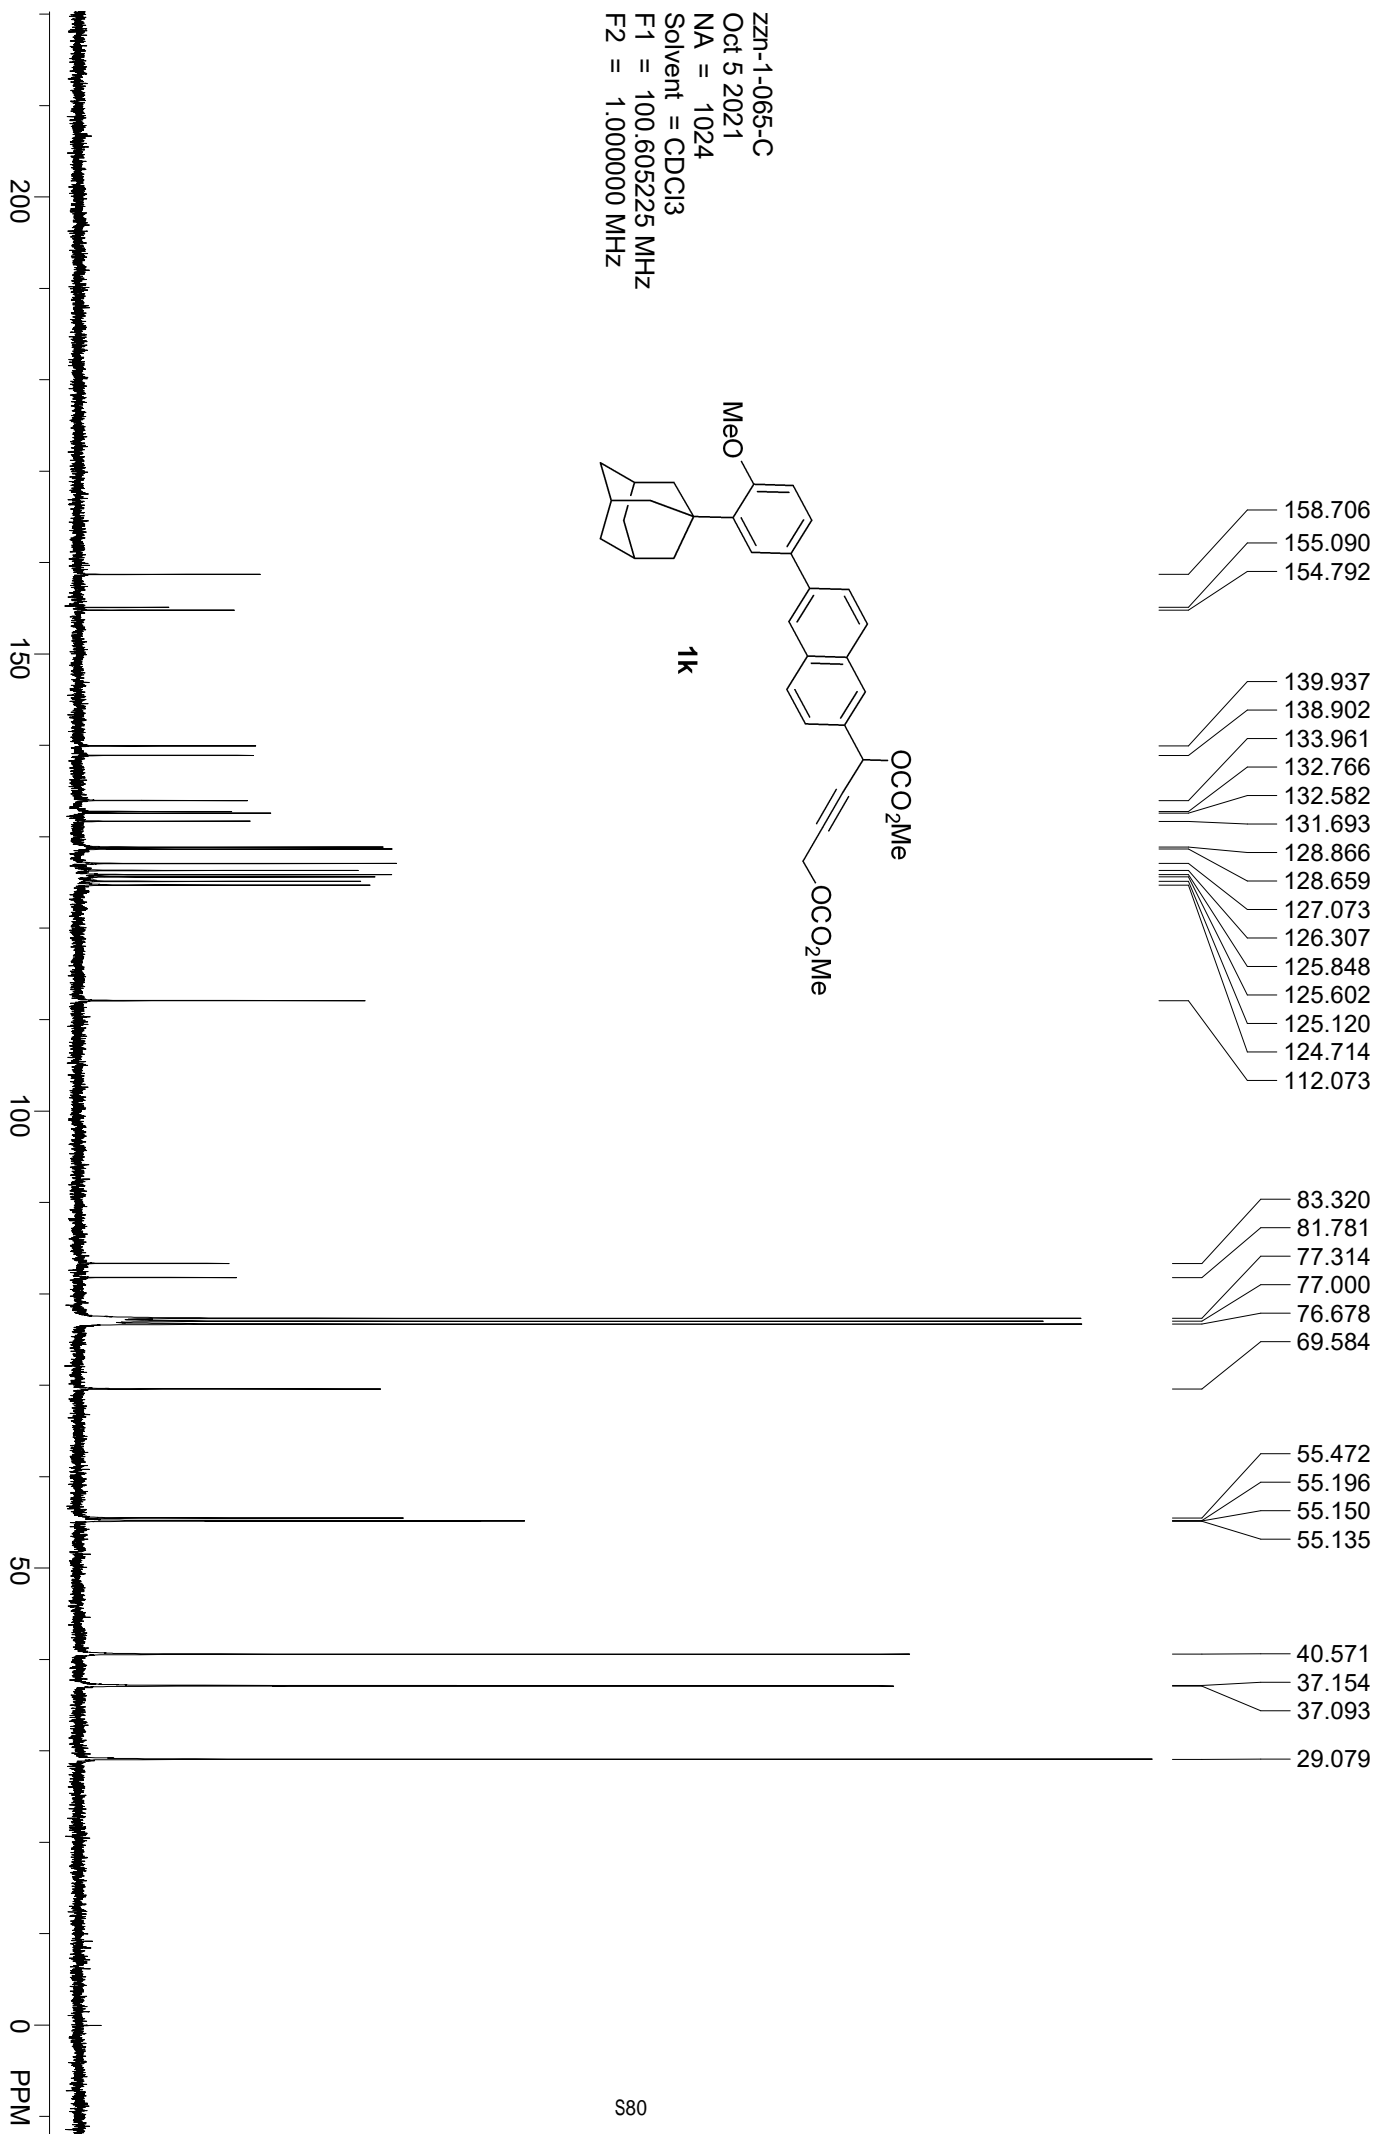



zZn-1-060-H  
Sep 21 2021  
NA = 8  
Solvent = CDCl3  
F1 = 399.717865 MHz  
F2 = 100.517960 MHz

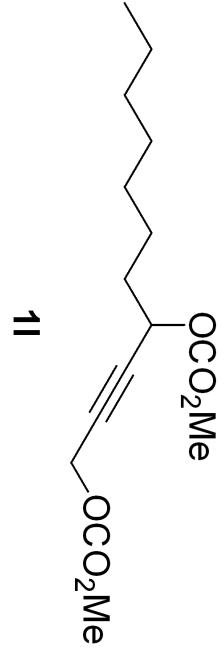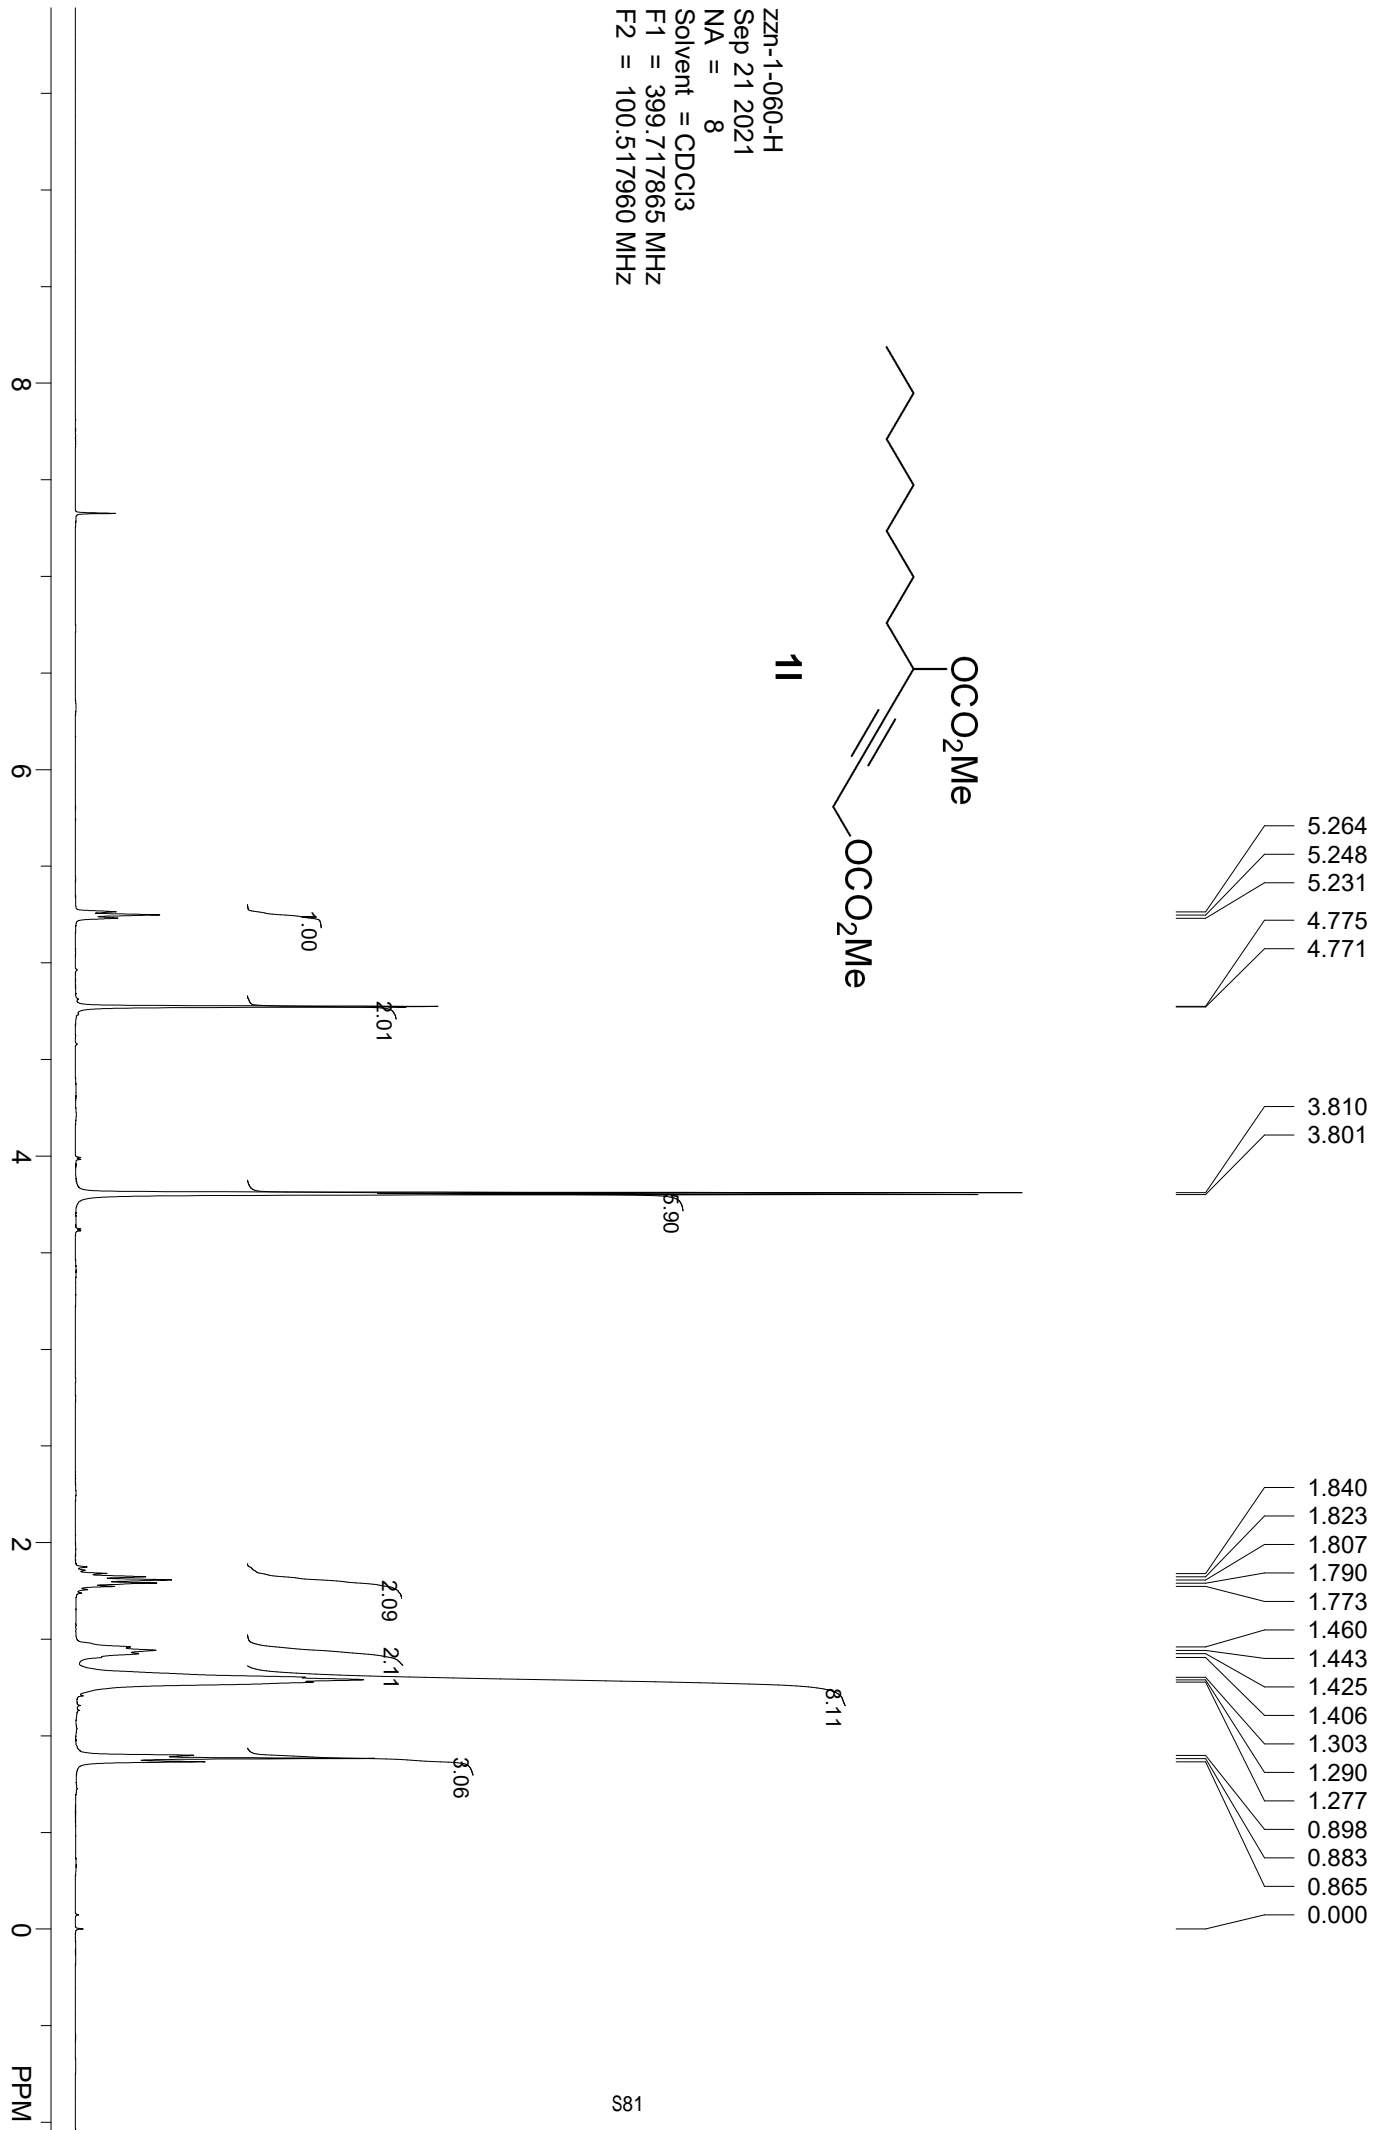

zzn-1-060-C  
Sep 22 2021  
NA = 100  
Solvent = cdcl3  
F1 = 100.598389 MHz  
F2 = 400.030792 MHz

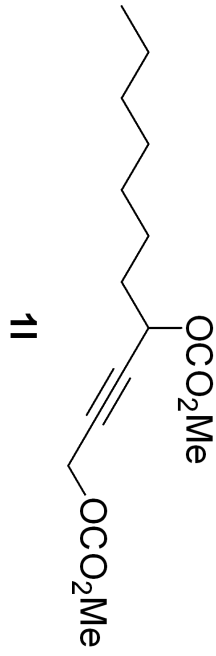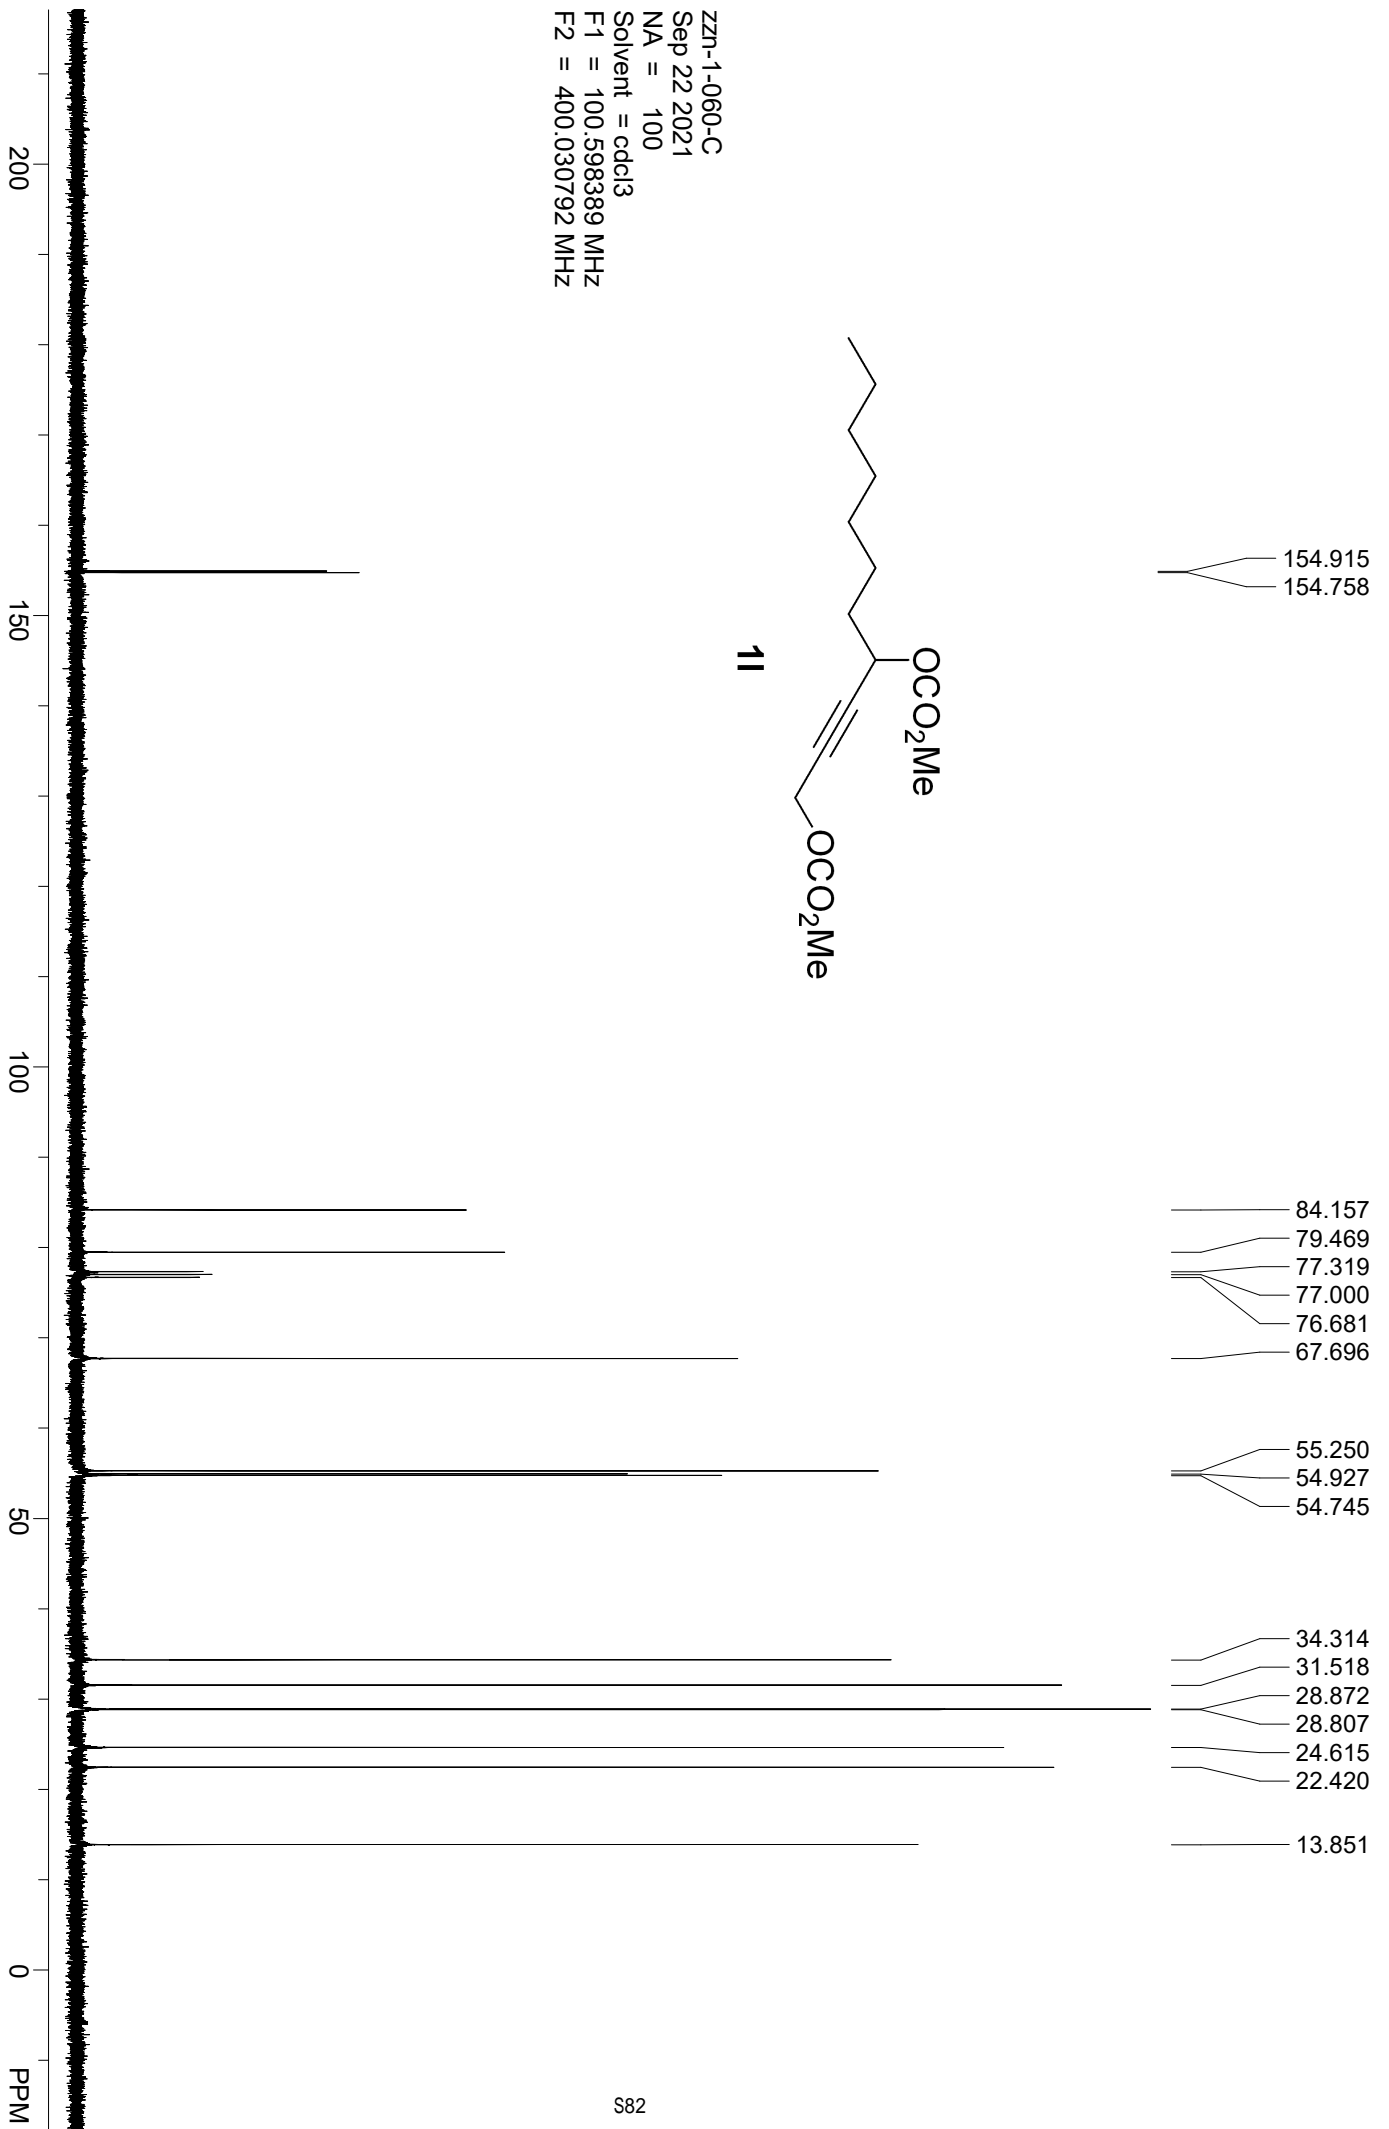

zZn-1-076-H  
Oct 16 2021  
NA = 4  
Solvent = CDCl3  
F1 = 400.031616 MHz  
F2 = 100.596855 MHz

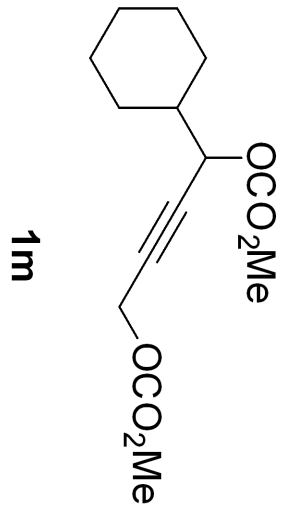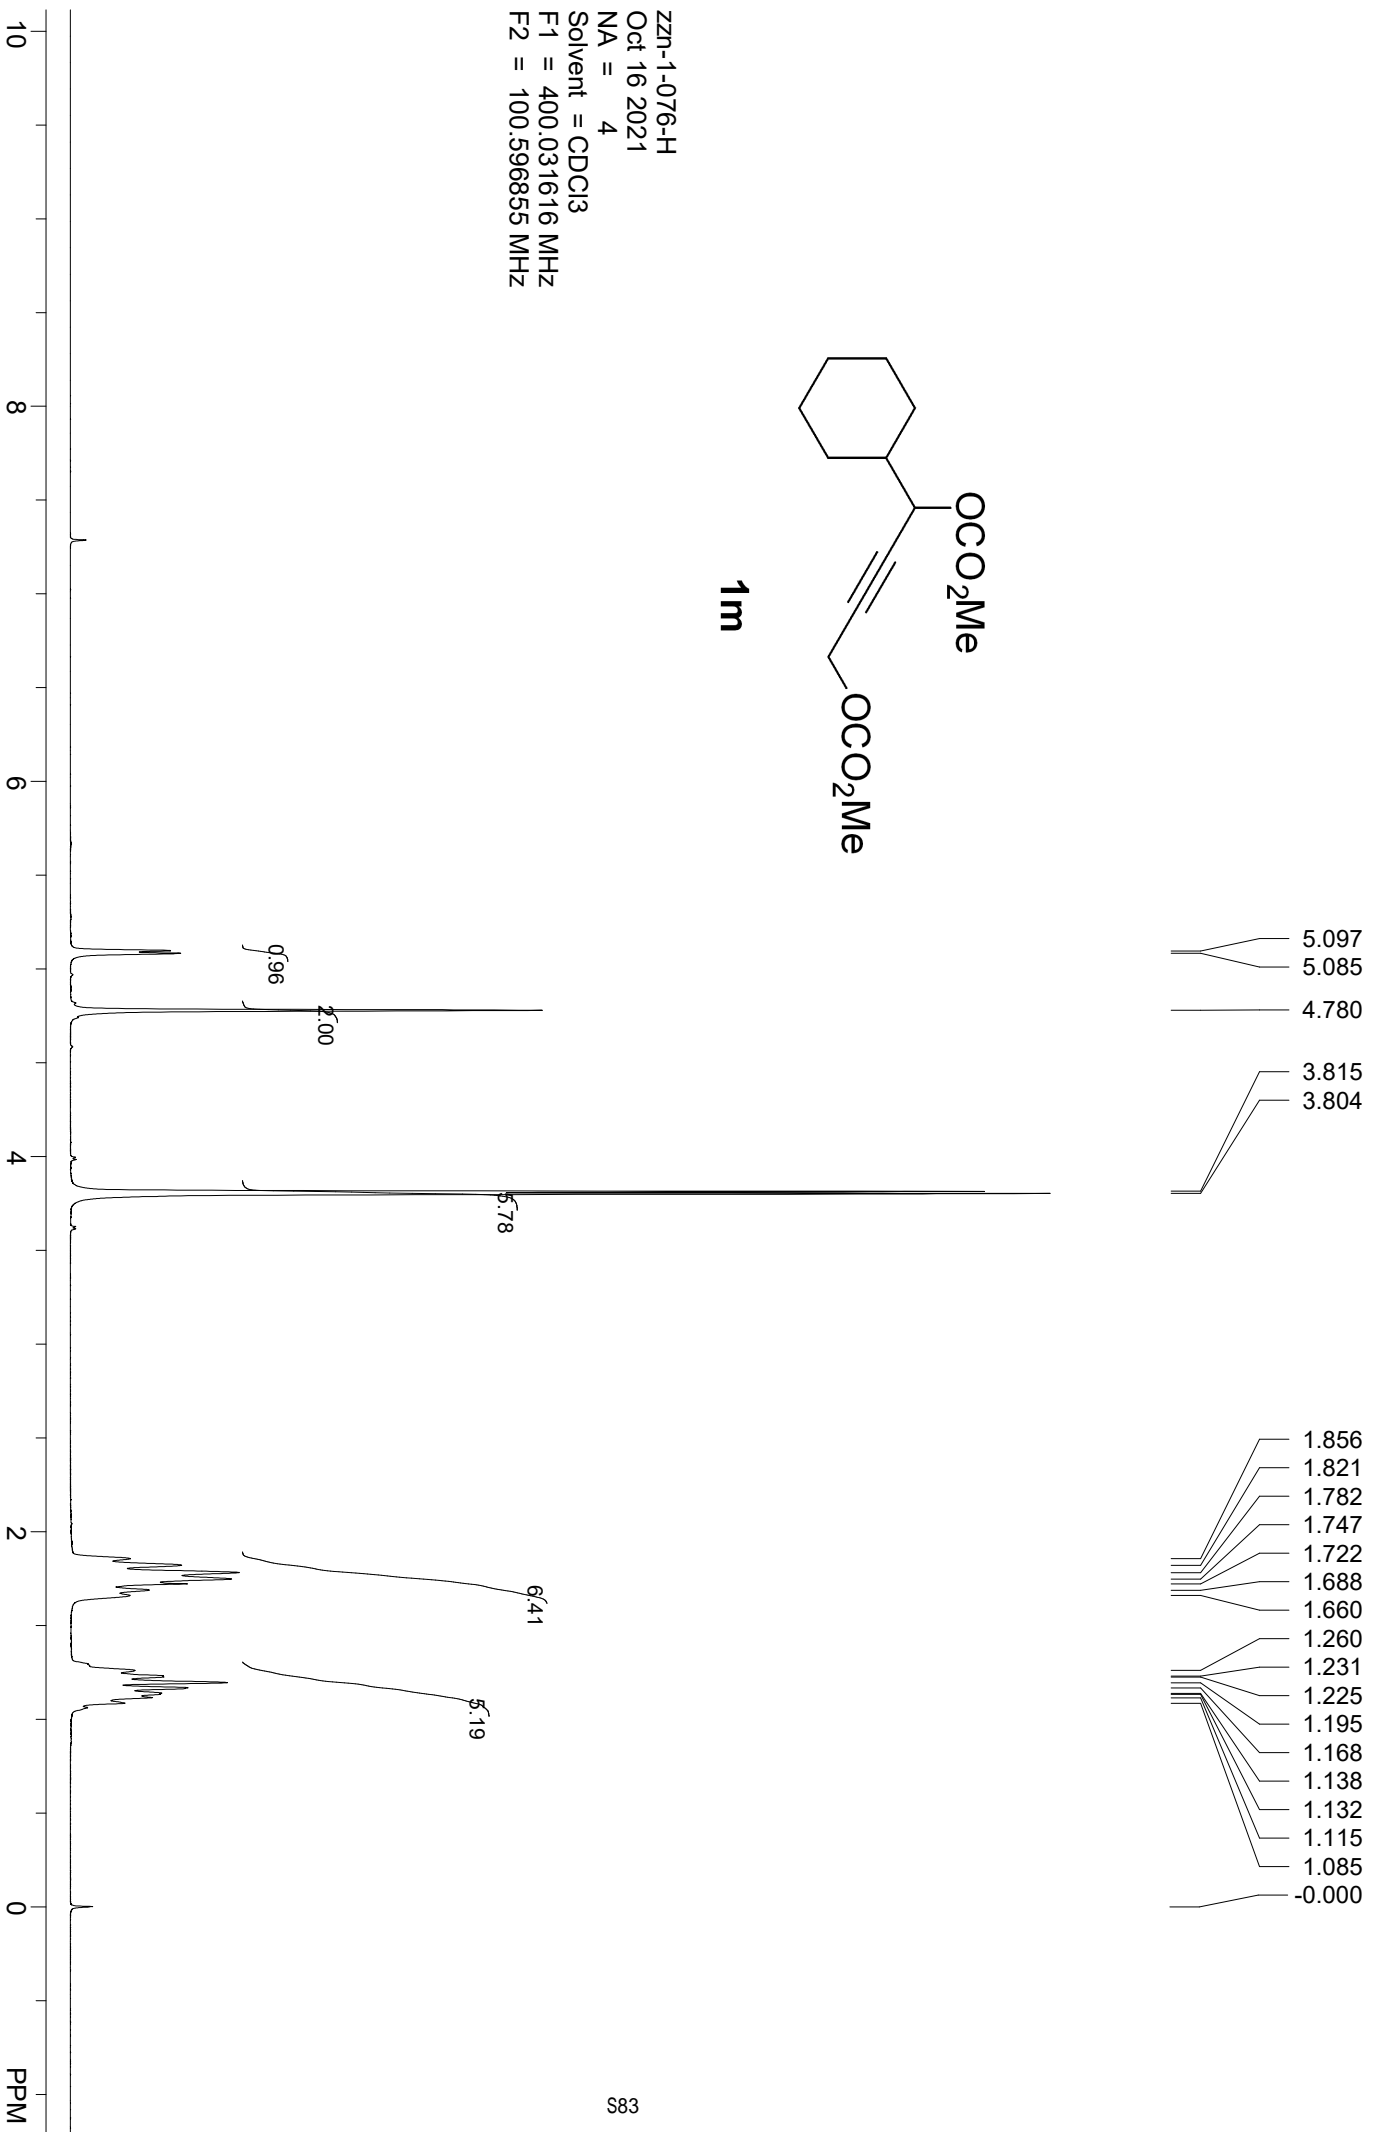

znn-1-076-C  
Oct 16 2021  
NA = 88  
Solvent = cdcl3  
F1 = 100.519485 MHz  
F2 = 399.717072 MHz

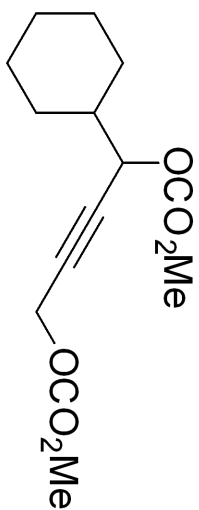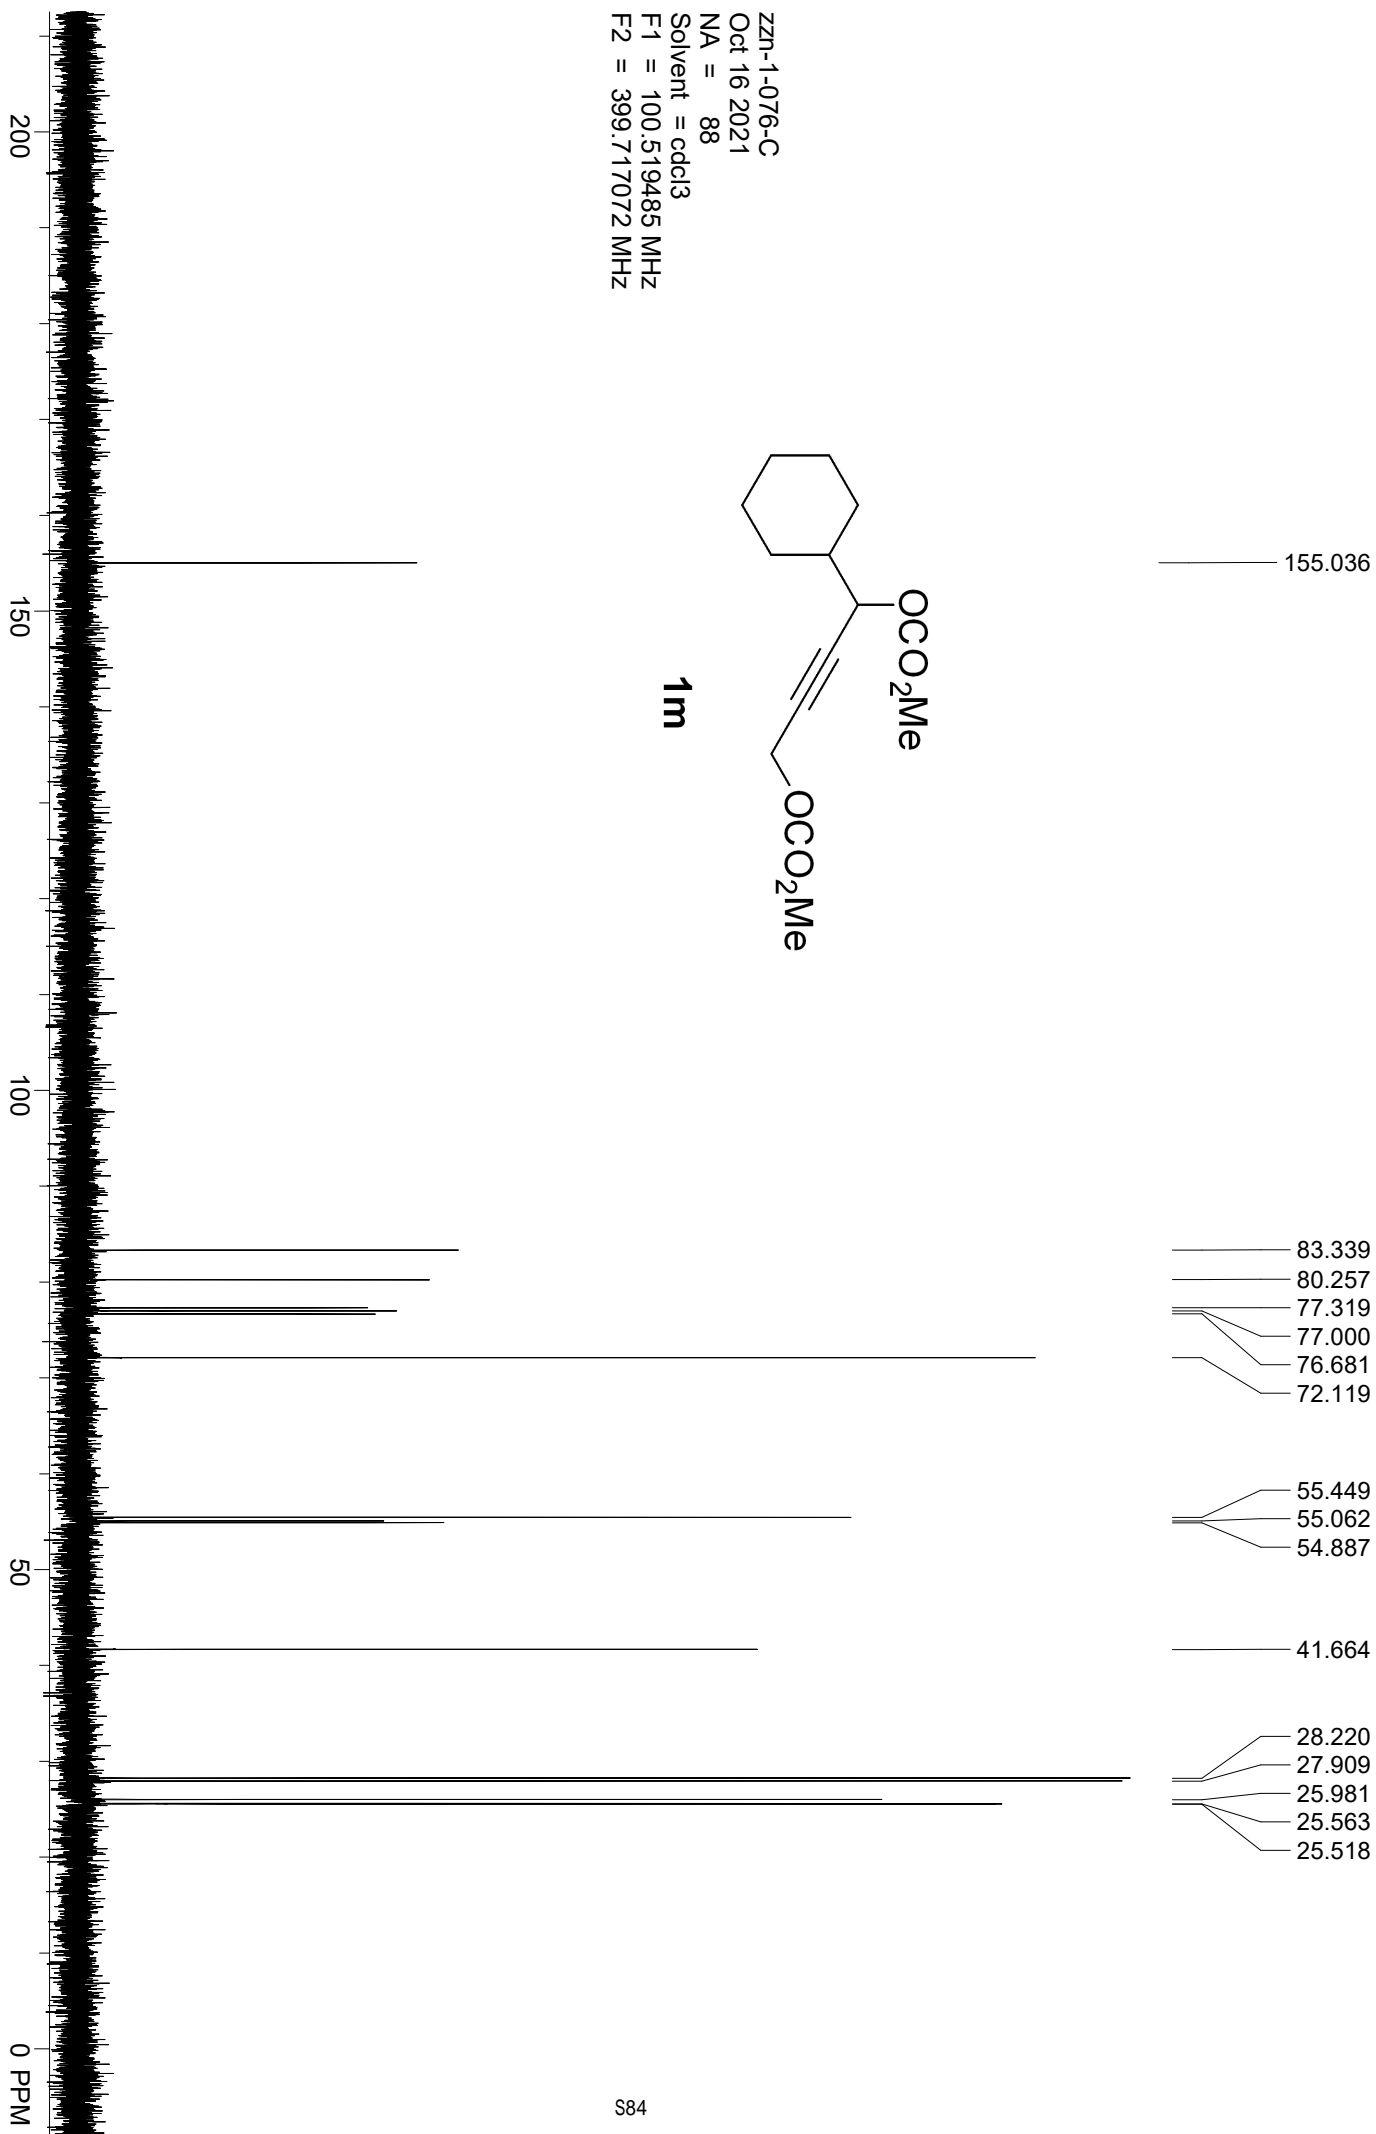

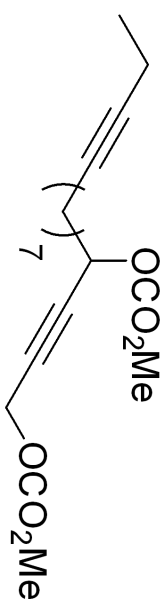

lican-06-047-H  
 Oct 7 2021  
 NA = 8  
 Solvent = CDCl<sub>3</sub>  
 F1 = 399.717865 MHz  
 F2 = 100.517960 MHz

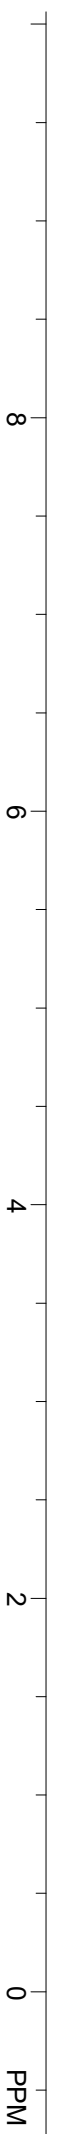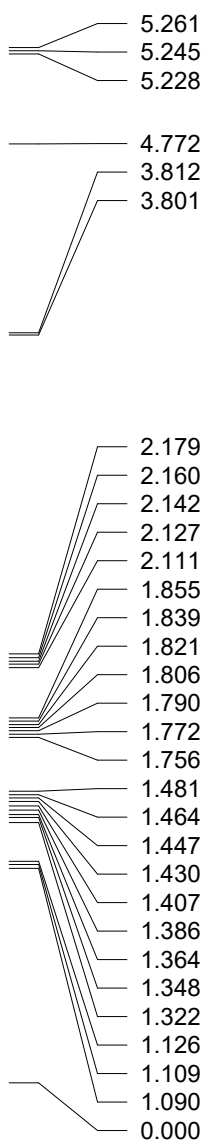

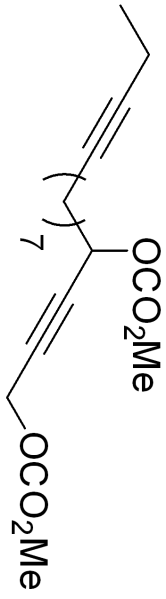

lican-06-047-C  
 Oct 7 2021  
 NA = 88  
 Solvent = cdcl3  
 F1 = 100.519485 MHz  
 F2 = 399.717072 MHz

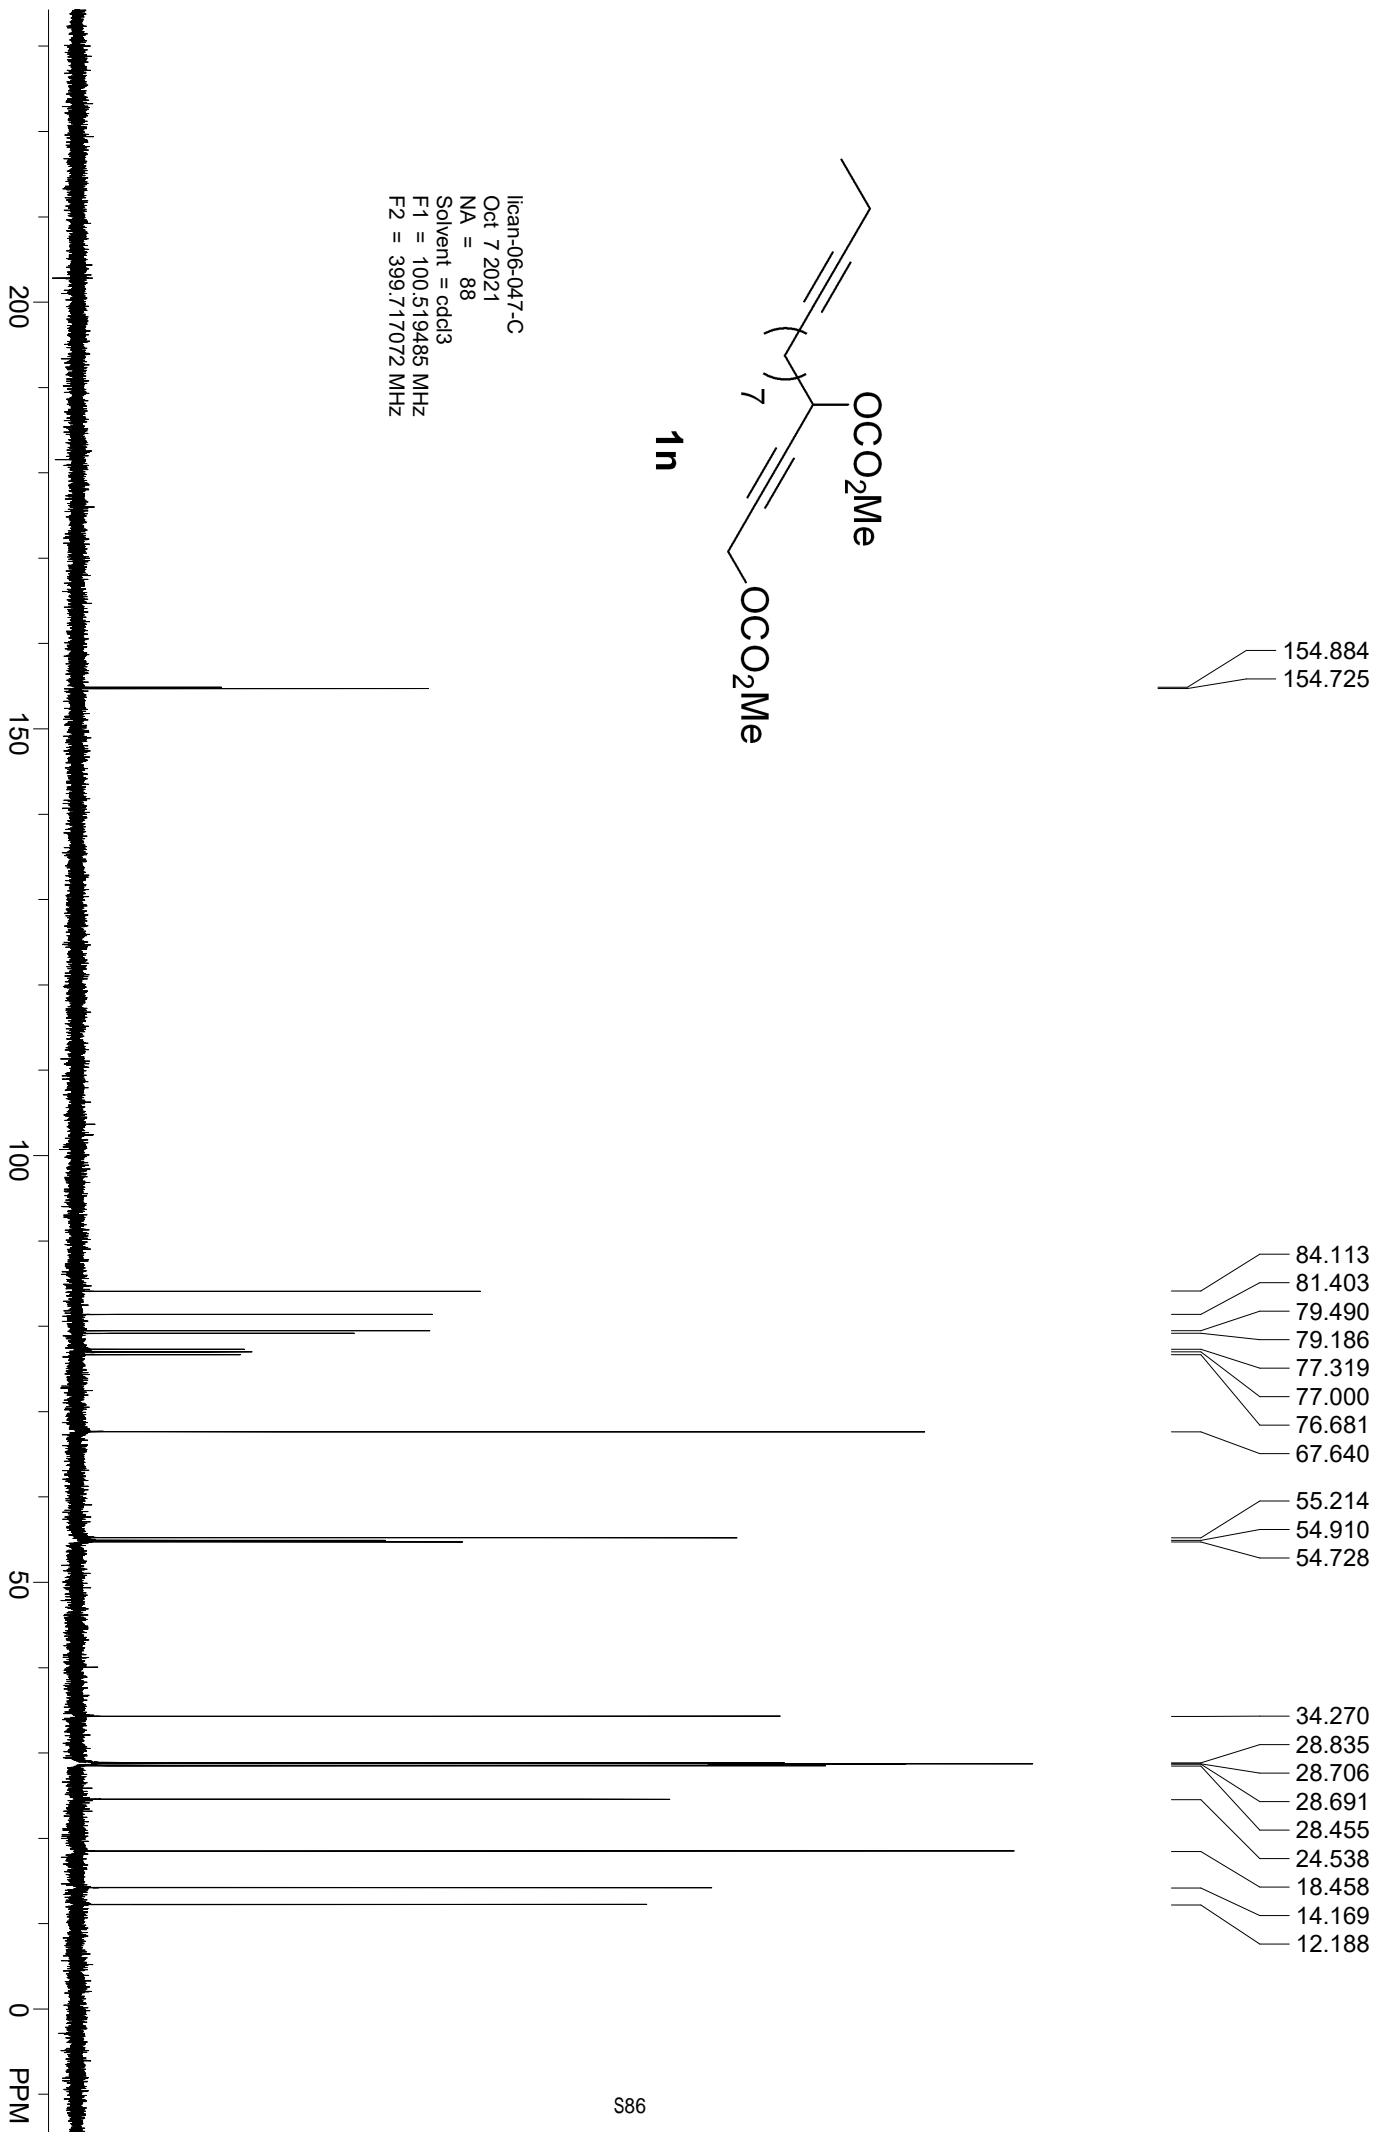

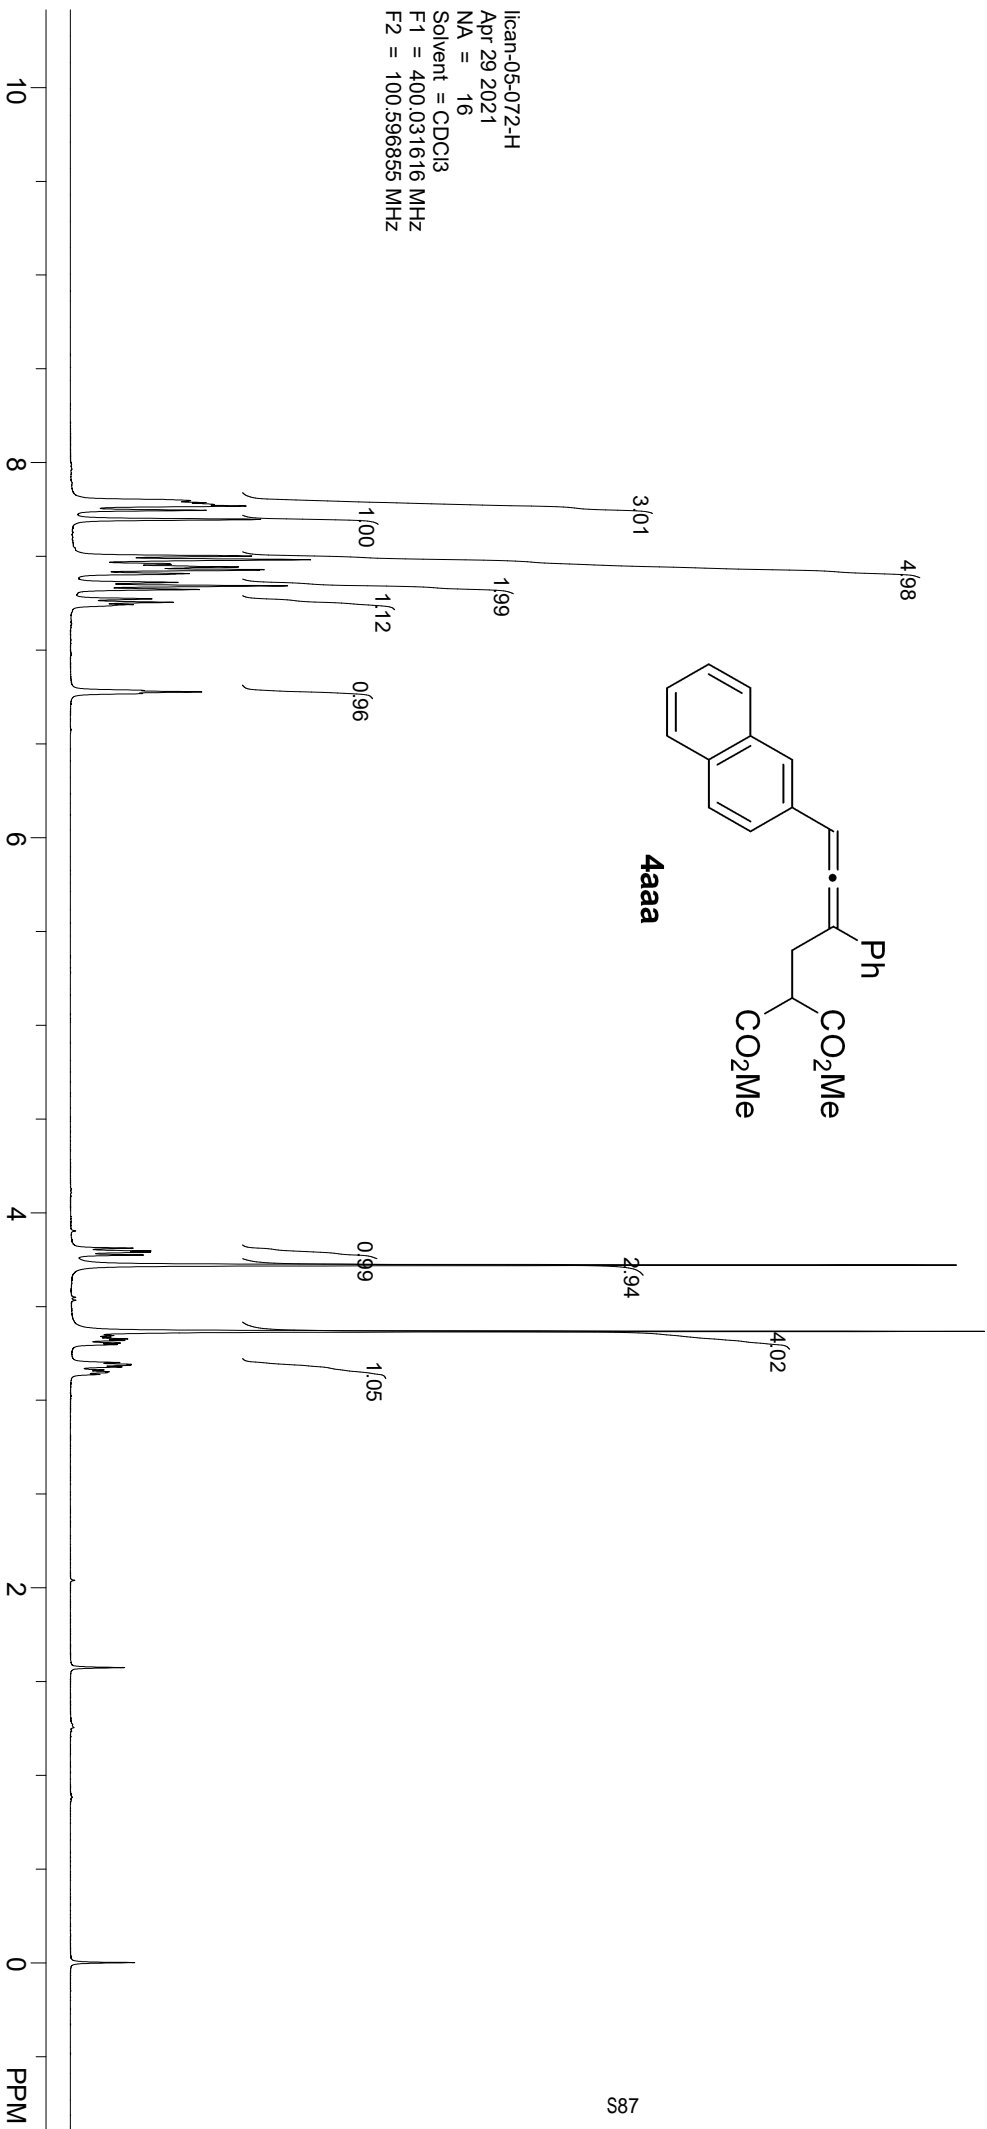

- 7.797
- 7.787
- 7.768
- 7.745
- 7.697
- 7.501
- 7.482
- 7.458
- 7.443
- 7.426
- 7.408
- 7.361
- 7.342
- 7.323
- 7.273
- 7.255
- 7.243
- 6.785
- 6.777
- 6.769

- 3.812
- 3.797
- 3.790
- 3.775
- 3.721
- 3.368
- 3.346
- 3.337
- 3.328
- 3.320
- 3.306
- 3.297
- 3.202
- 3.192
- 3.188
- 3.178
- 3.162
- 3.153
- 3.148
- 3.138

0.000

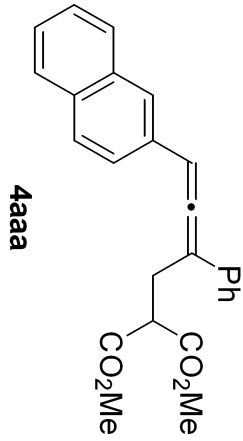

lican-05-072-C  
 Apr 30 2021  
 NA = 464  
 Solvent = cdcl3  
 F1 = 100.598389 MHz  
 F2 = 400.030792 MHz

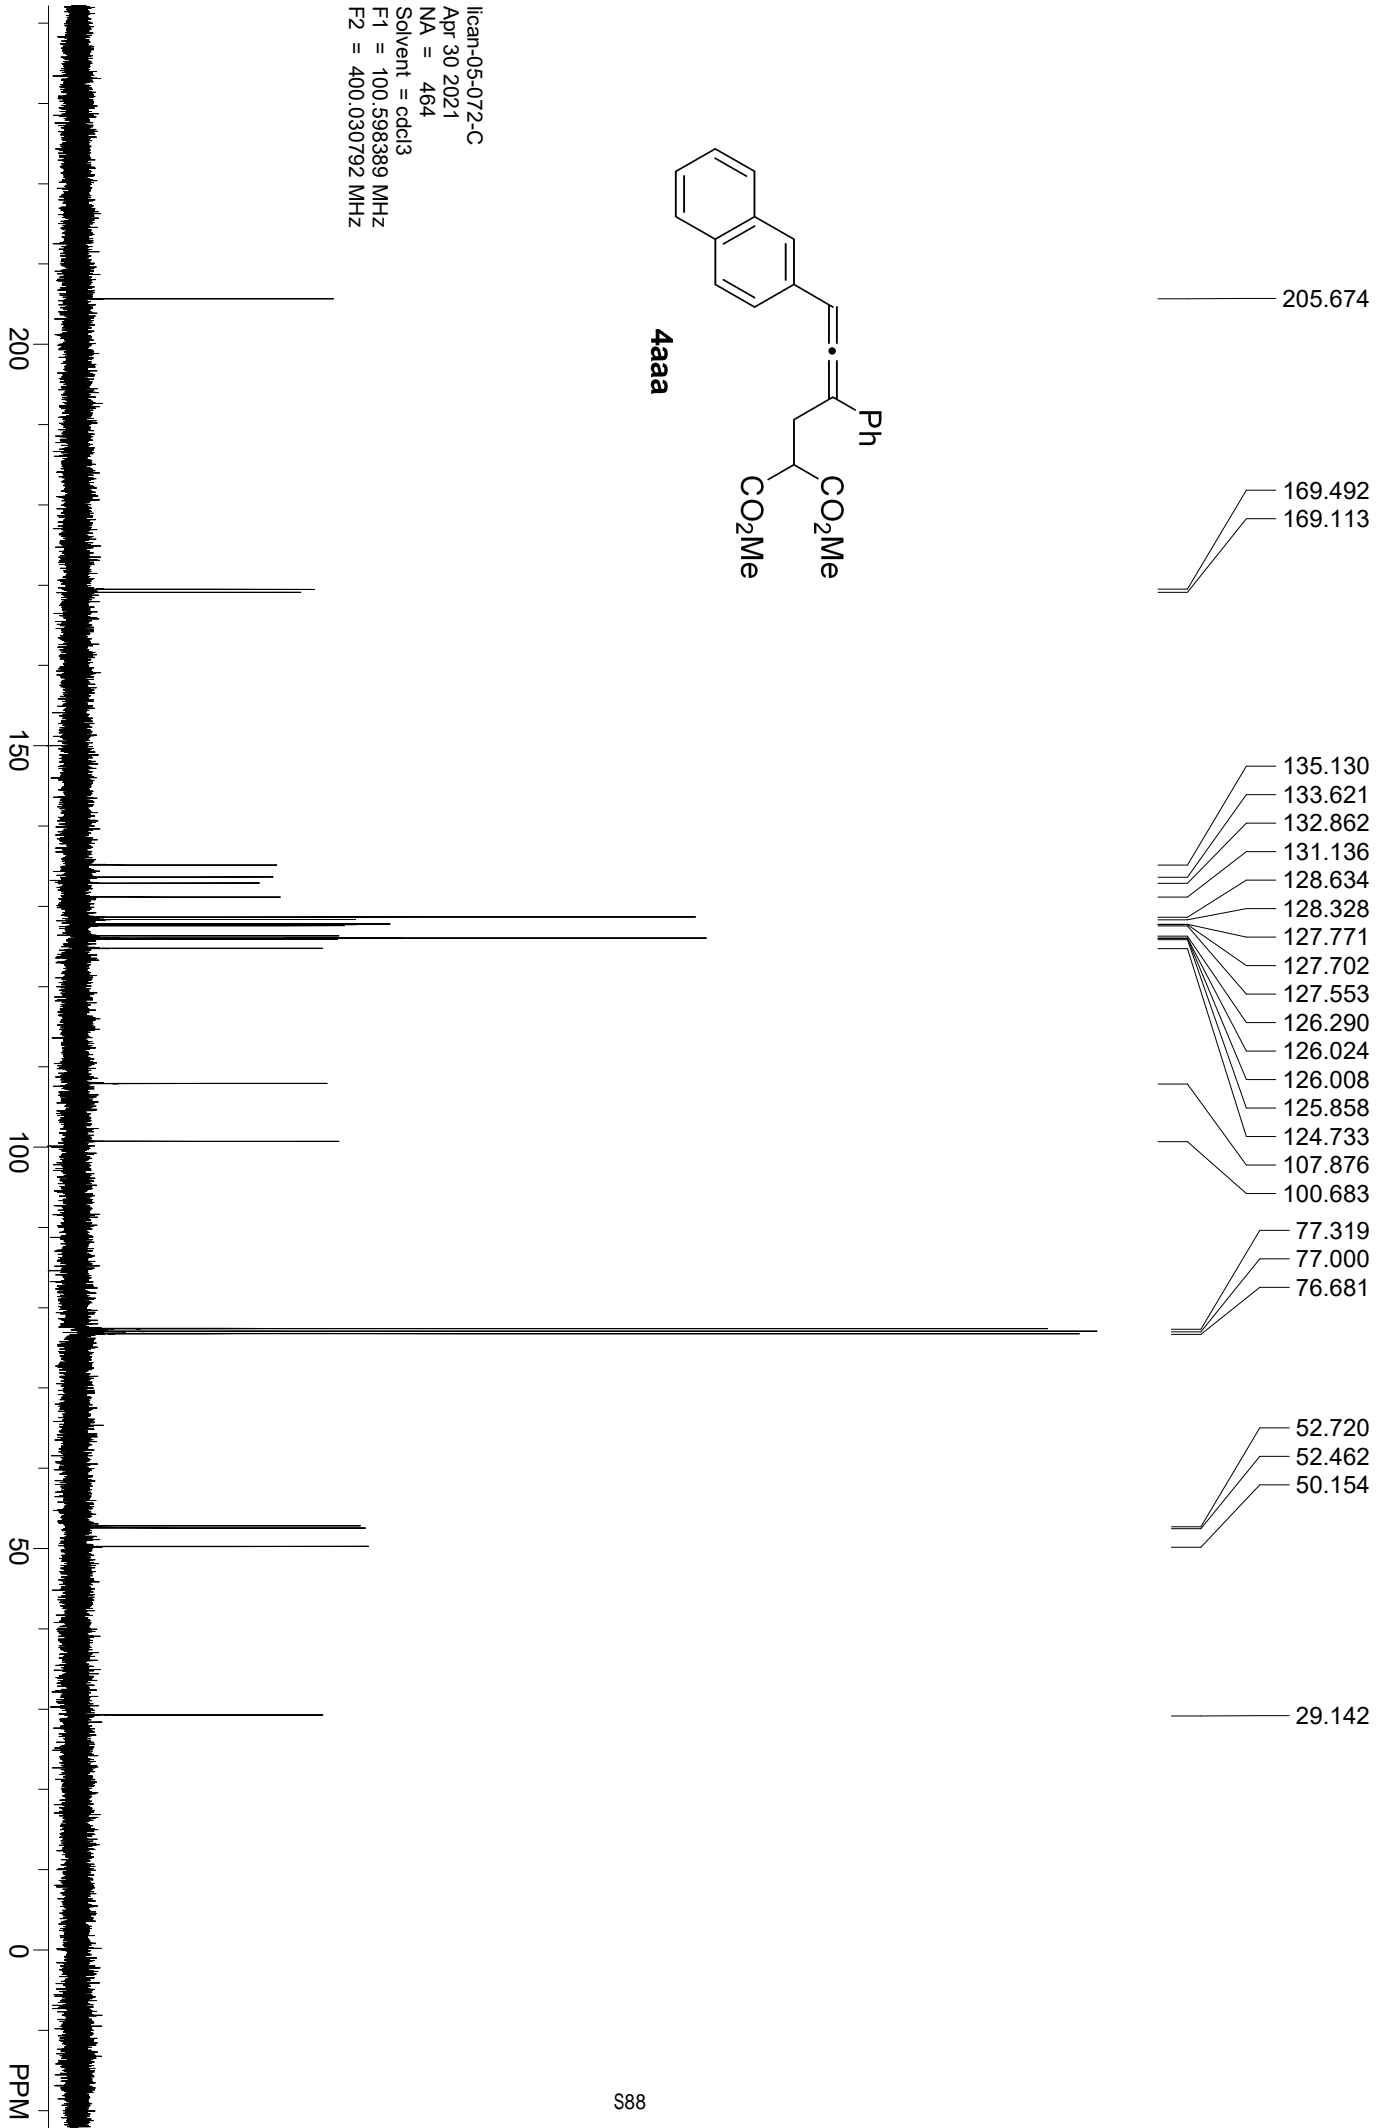



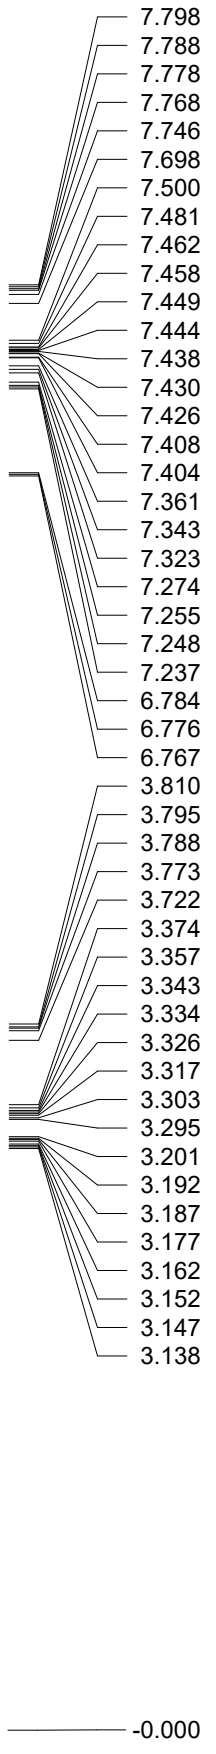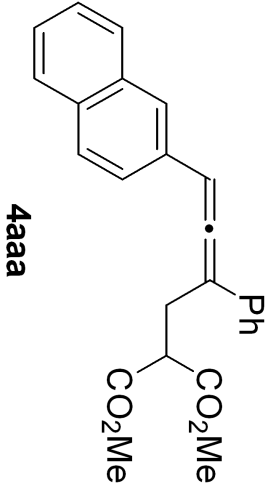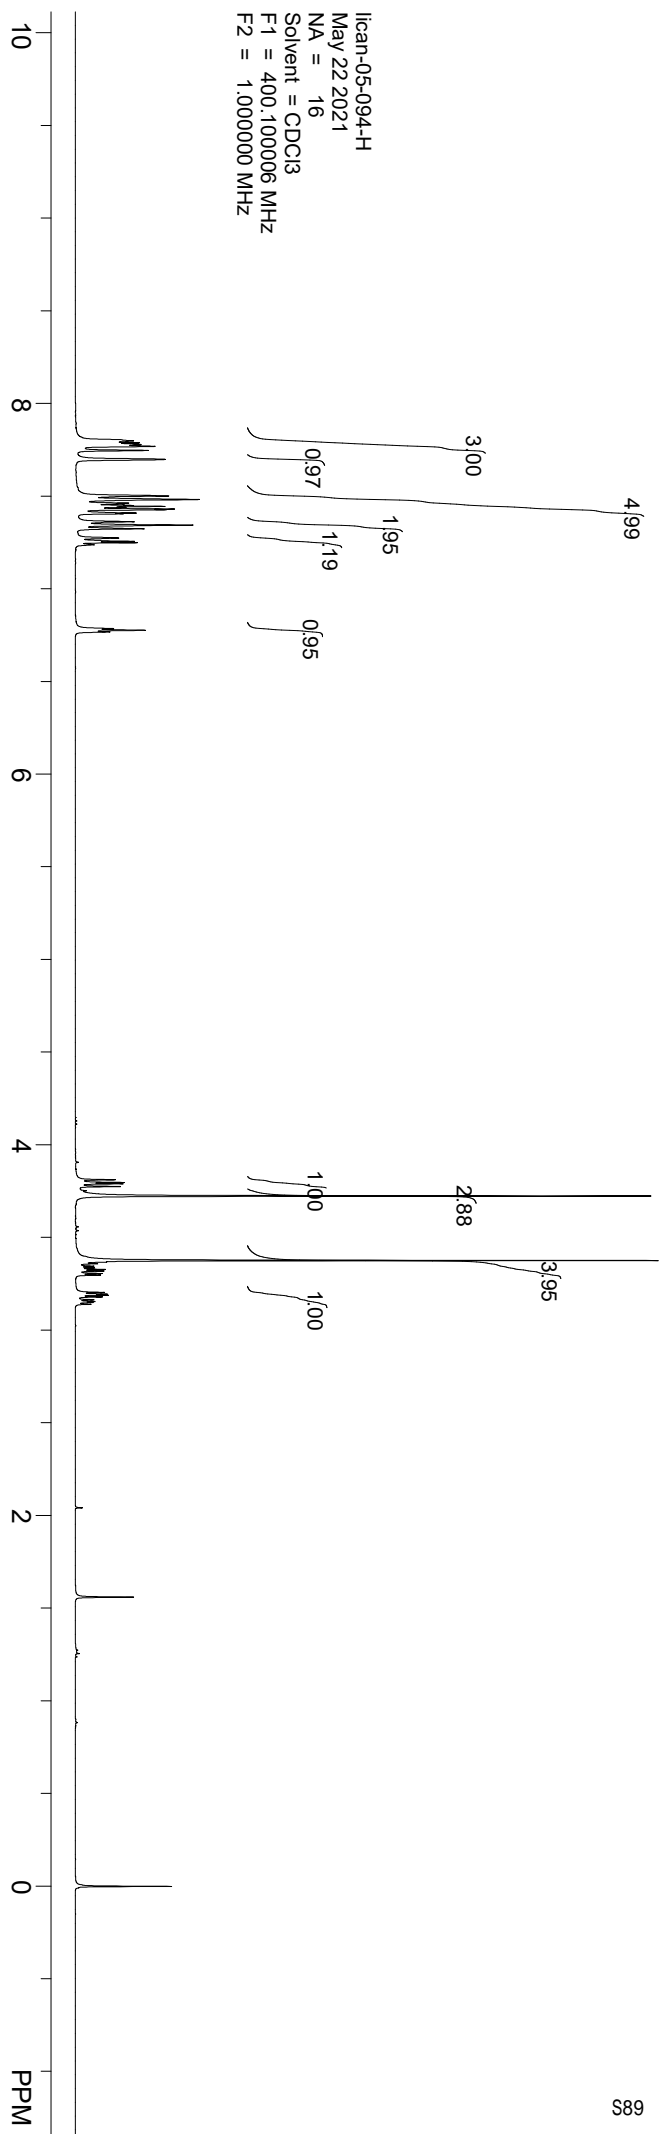

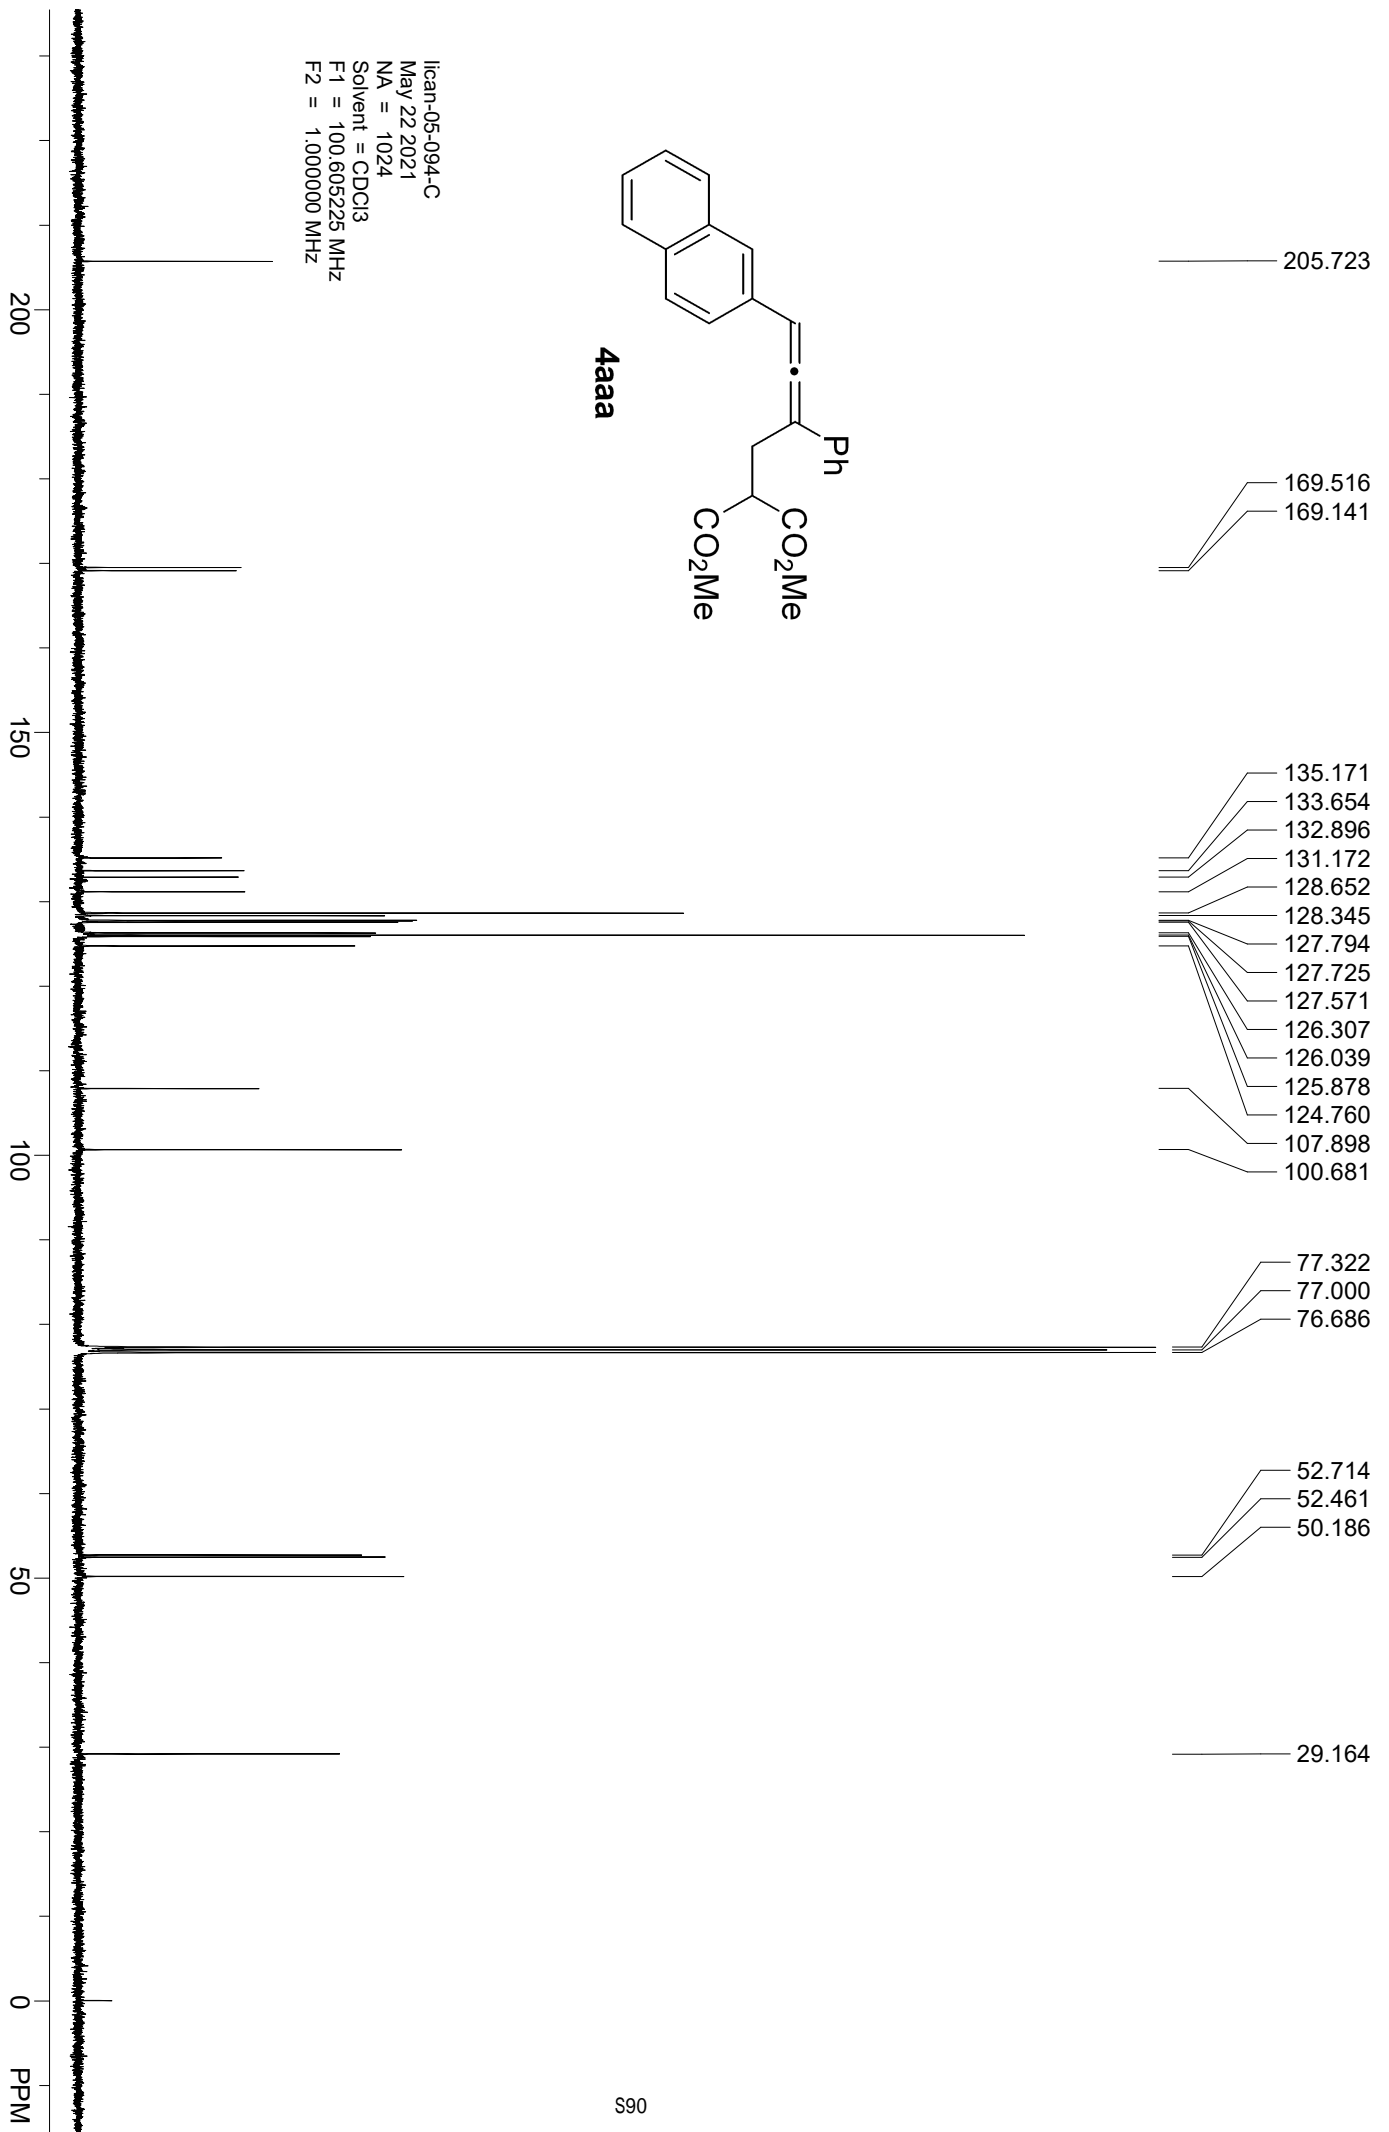

- 7.467
- 7.463
- 7.445
- 7.342
- 7.323
- 7.304
- 7.304
- 7.283
- 7.265
- 7.254
- 7.236
- 7.231
- 7.224
- 7.217
- 7.208
- 7.199
- 7.192
- 6.603
- 6.594
- 6.585

- 3.778
- 3.763
- 3.756
- 3.741
- 3.712
- 3.401
- 3.322
- 3.313
- 3.300
- 3.291
- 3.282
- 3.274
- 3.261
- 3.252
- 3.161
- 3.151
- 3.146
- 3.136
- 3.121
- 3.112
- 3.106
- 3.097

0.000

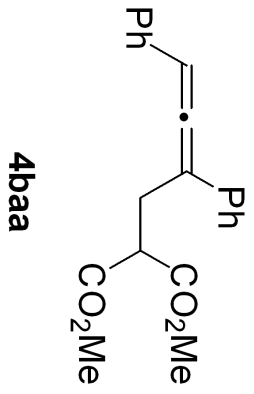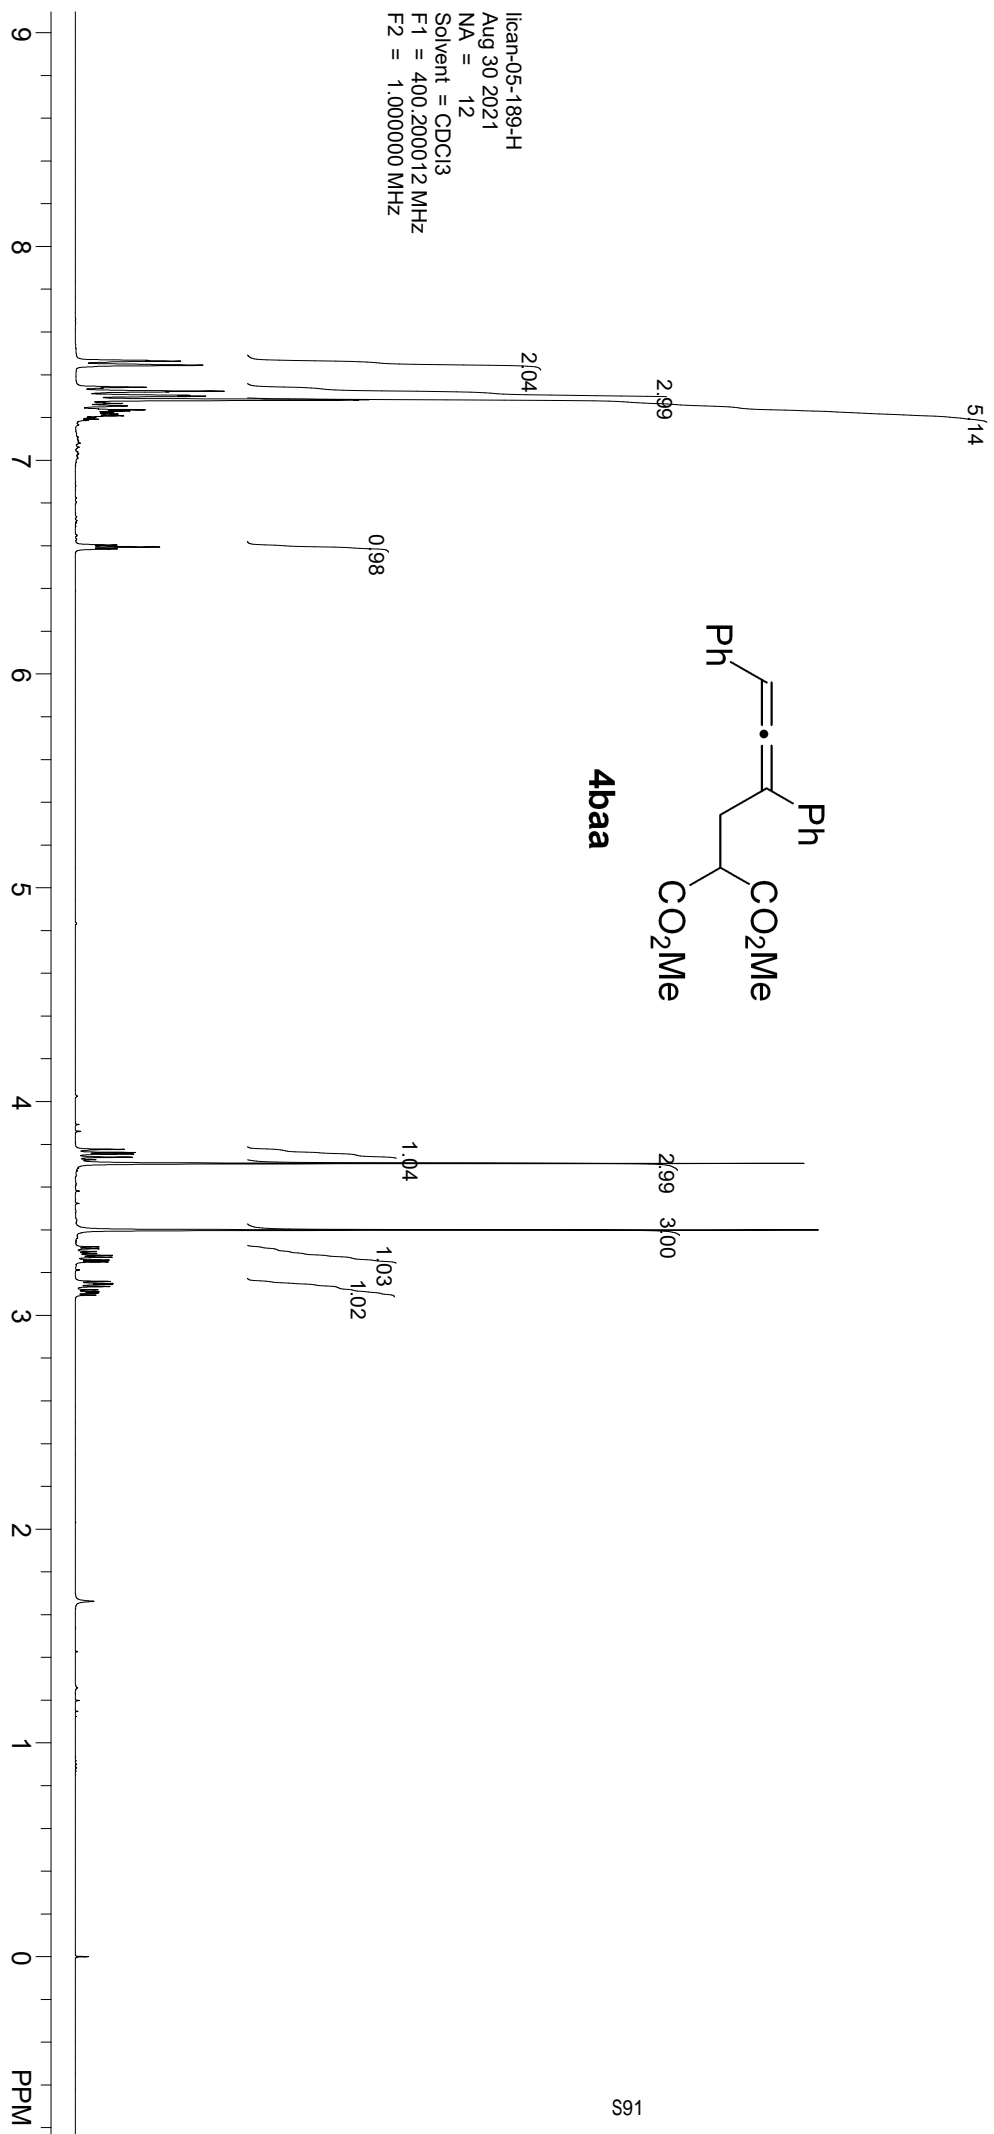

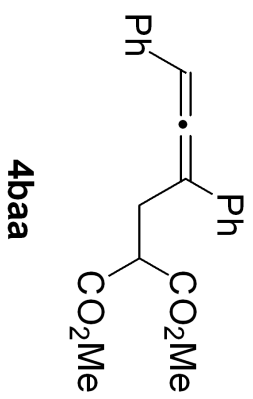

lican-05-189-H-purity  
purity = 95%  
48.9 mg product with 35 uL dibromomethane  
NA = 6  
Solvent = CDCl3  
F1 = 400.200012 MHz  
F2 = 1.000000 MHz

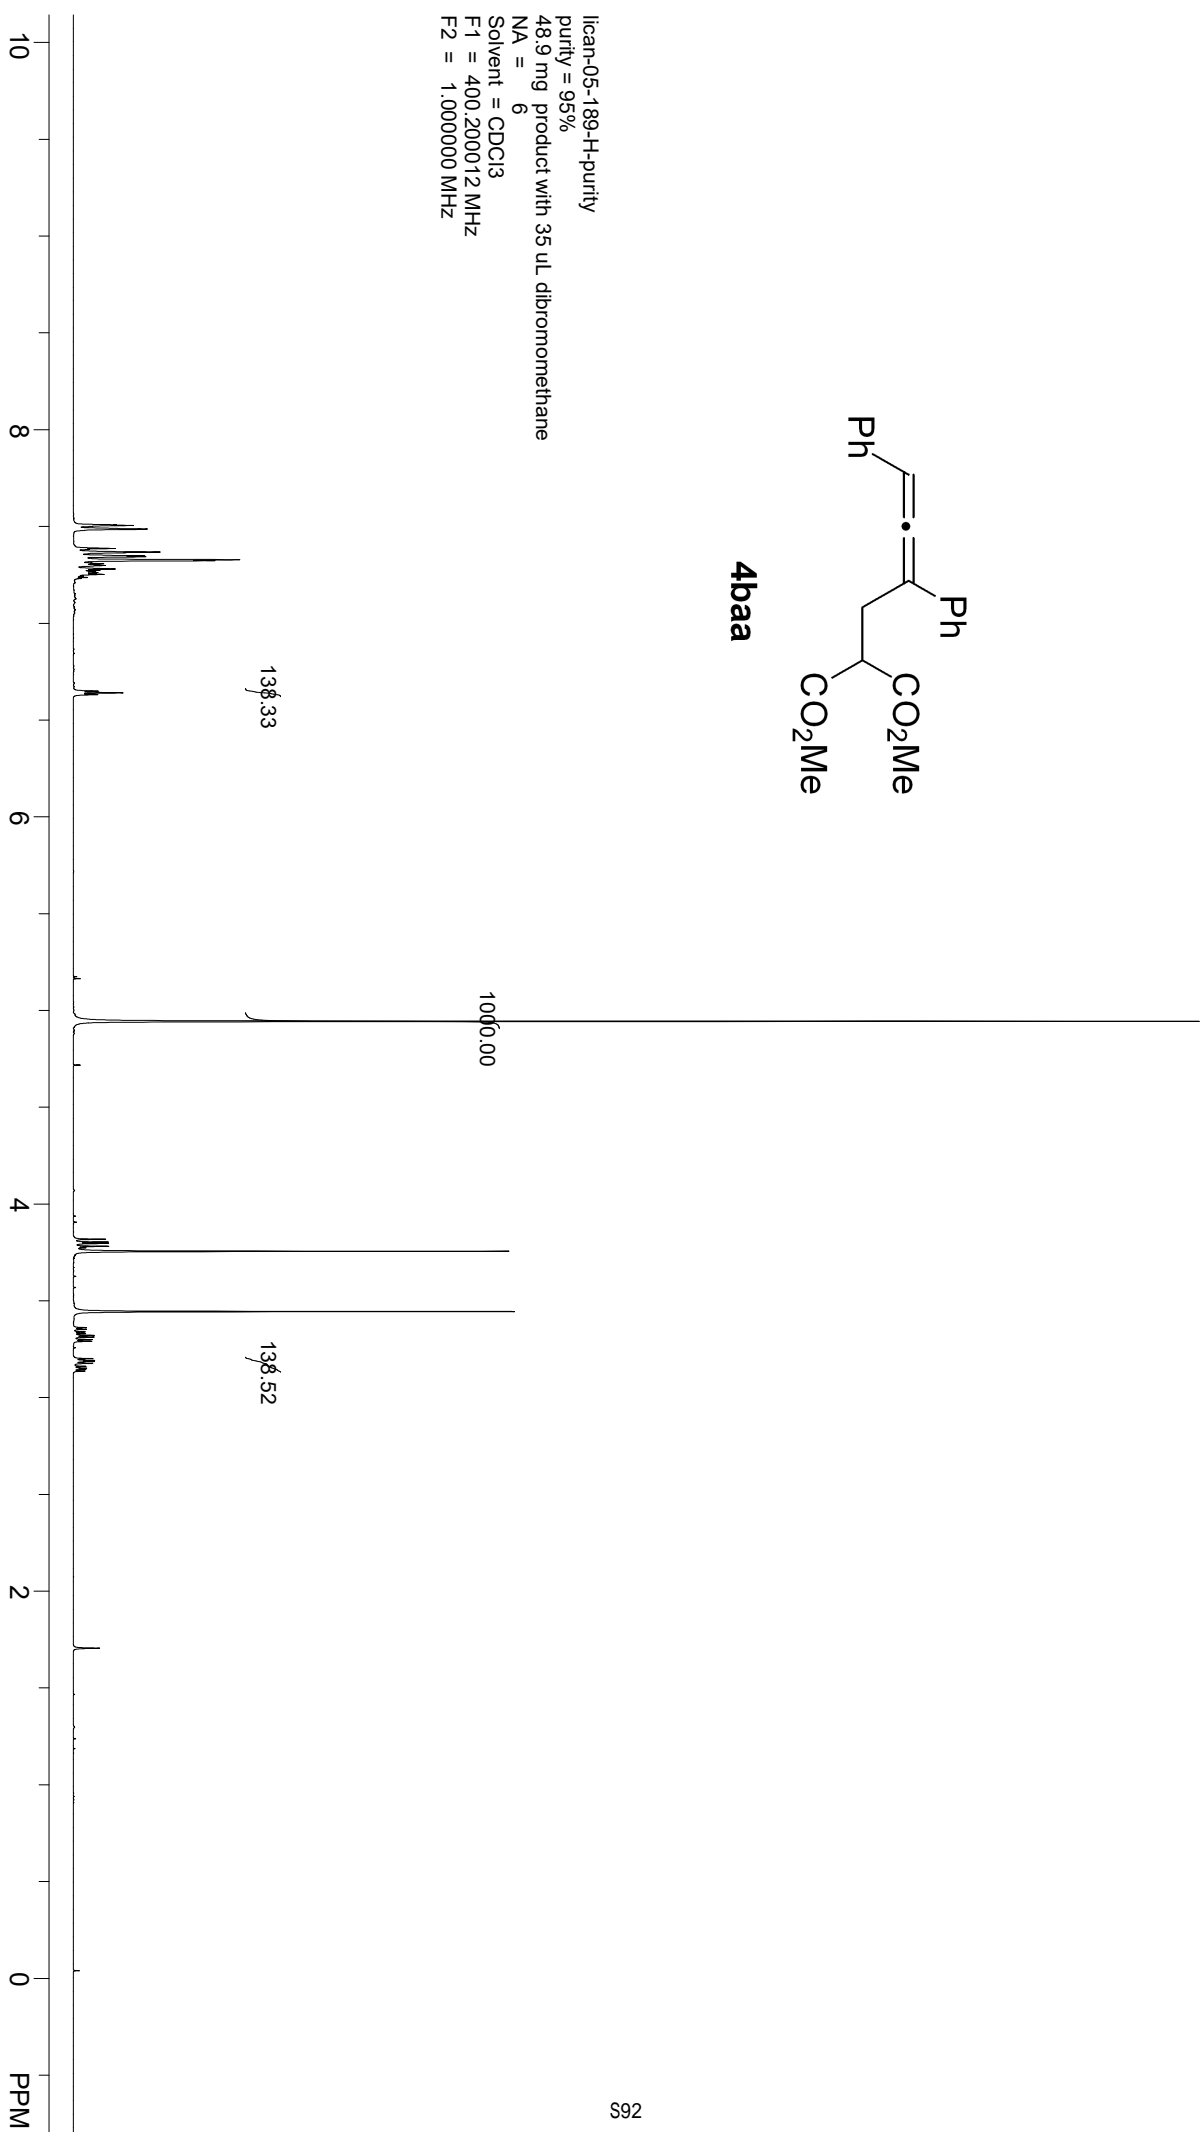

lican-05-189-C  
Aug 30 2021  
NA = 537  
Solvent = CDCl3  
F1 = 100.630371 MHz  
F2 = 1.000000 MHz

**4baa**

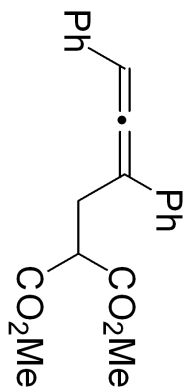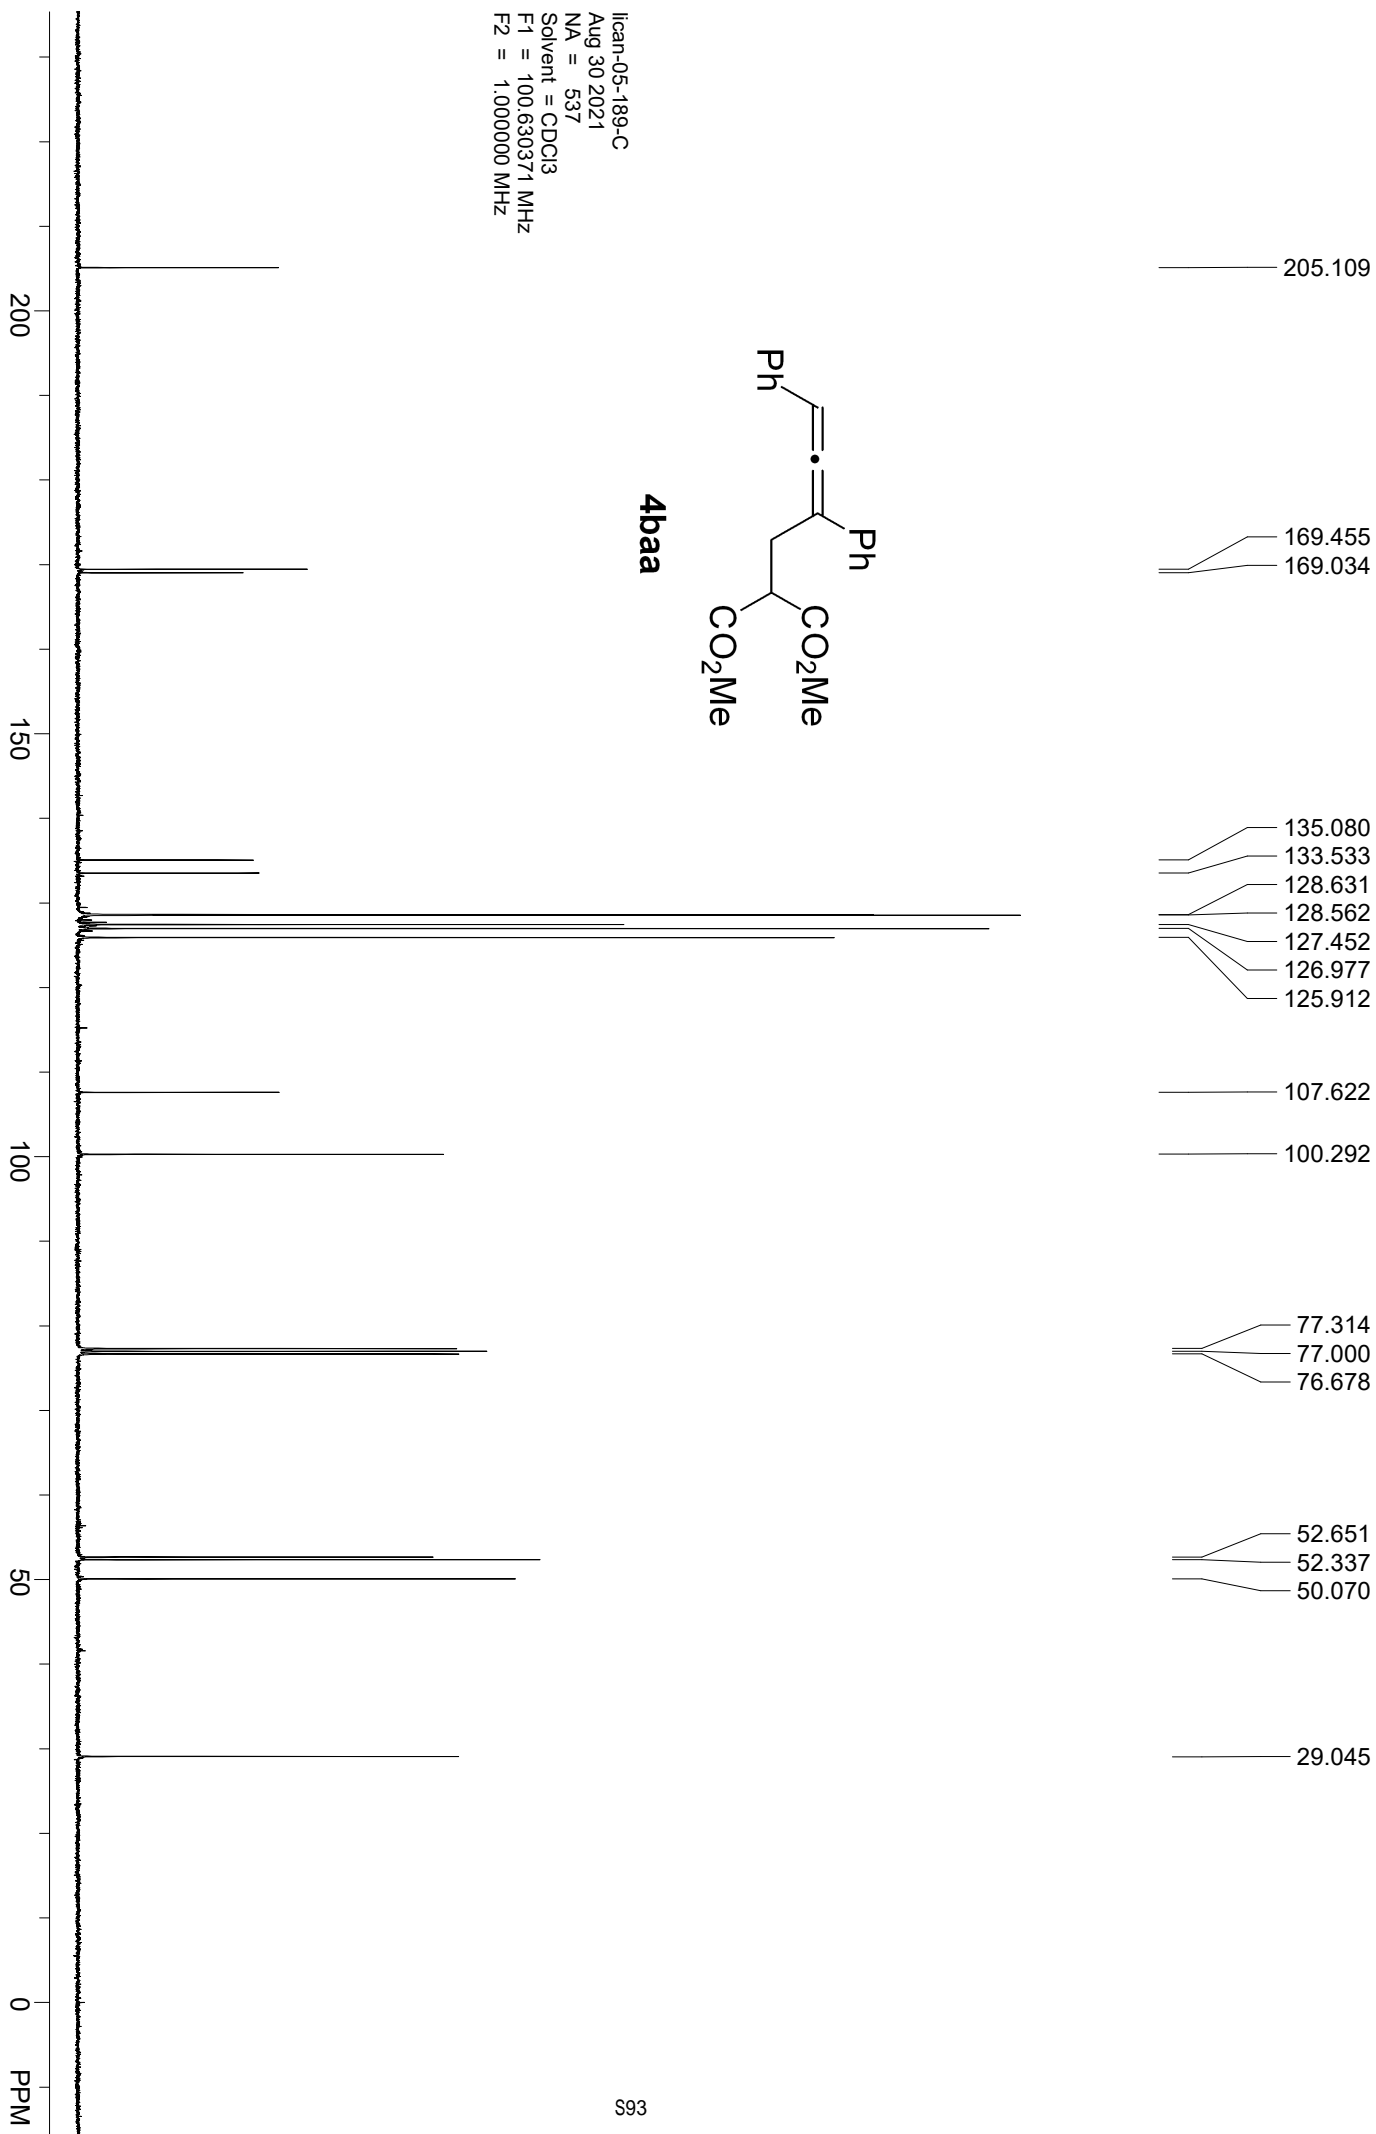

lican-06-016-H  
Sep 13 2021  
NA = 8  
Solvent = CDCl3  
F1 = 400.031616 MHz  
F2 = 100.596855 MHz

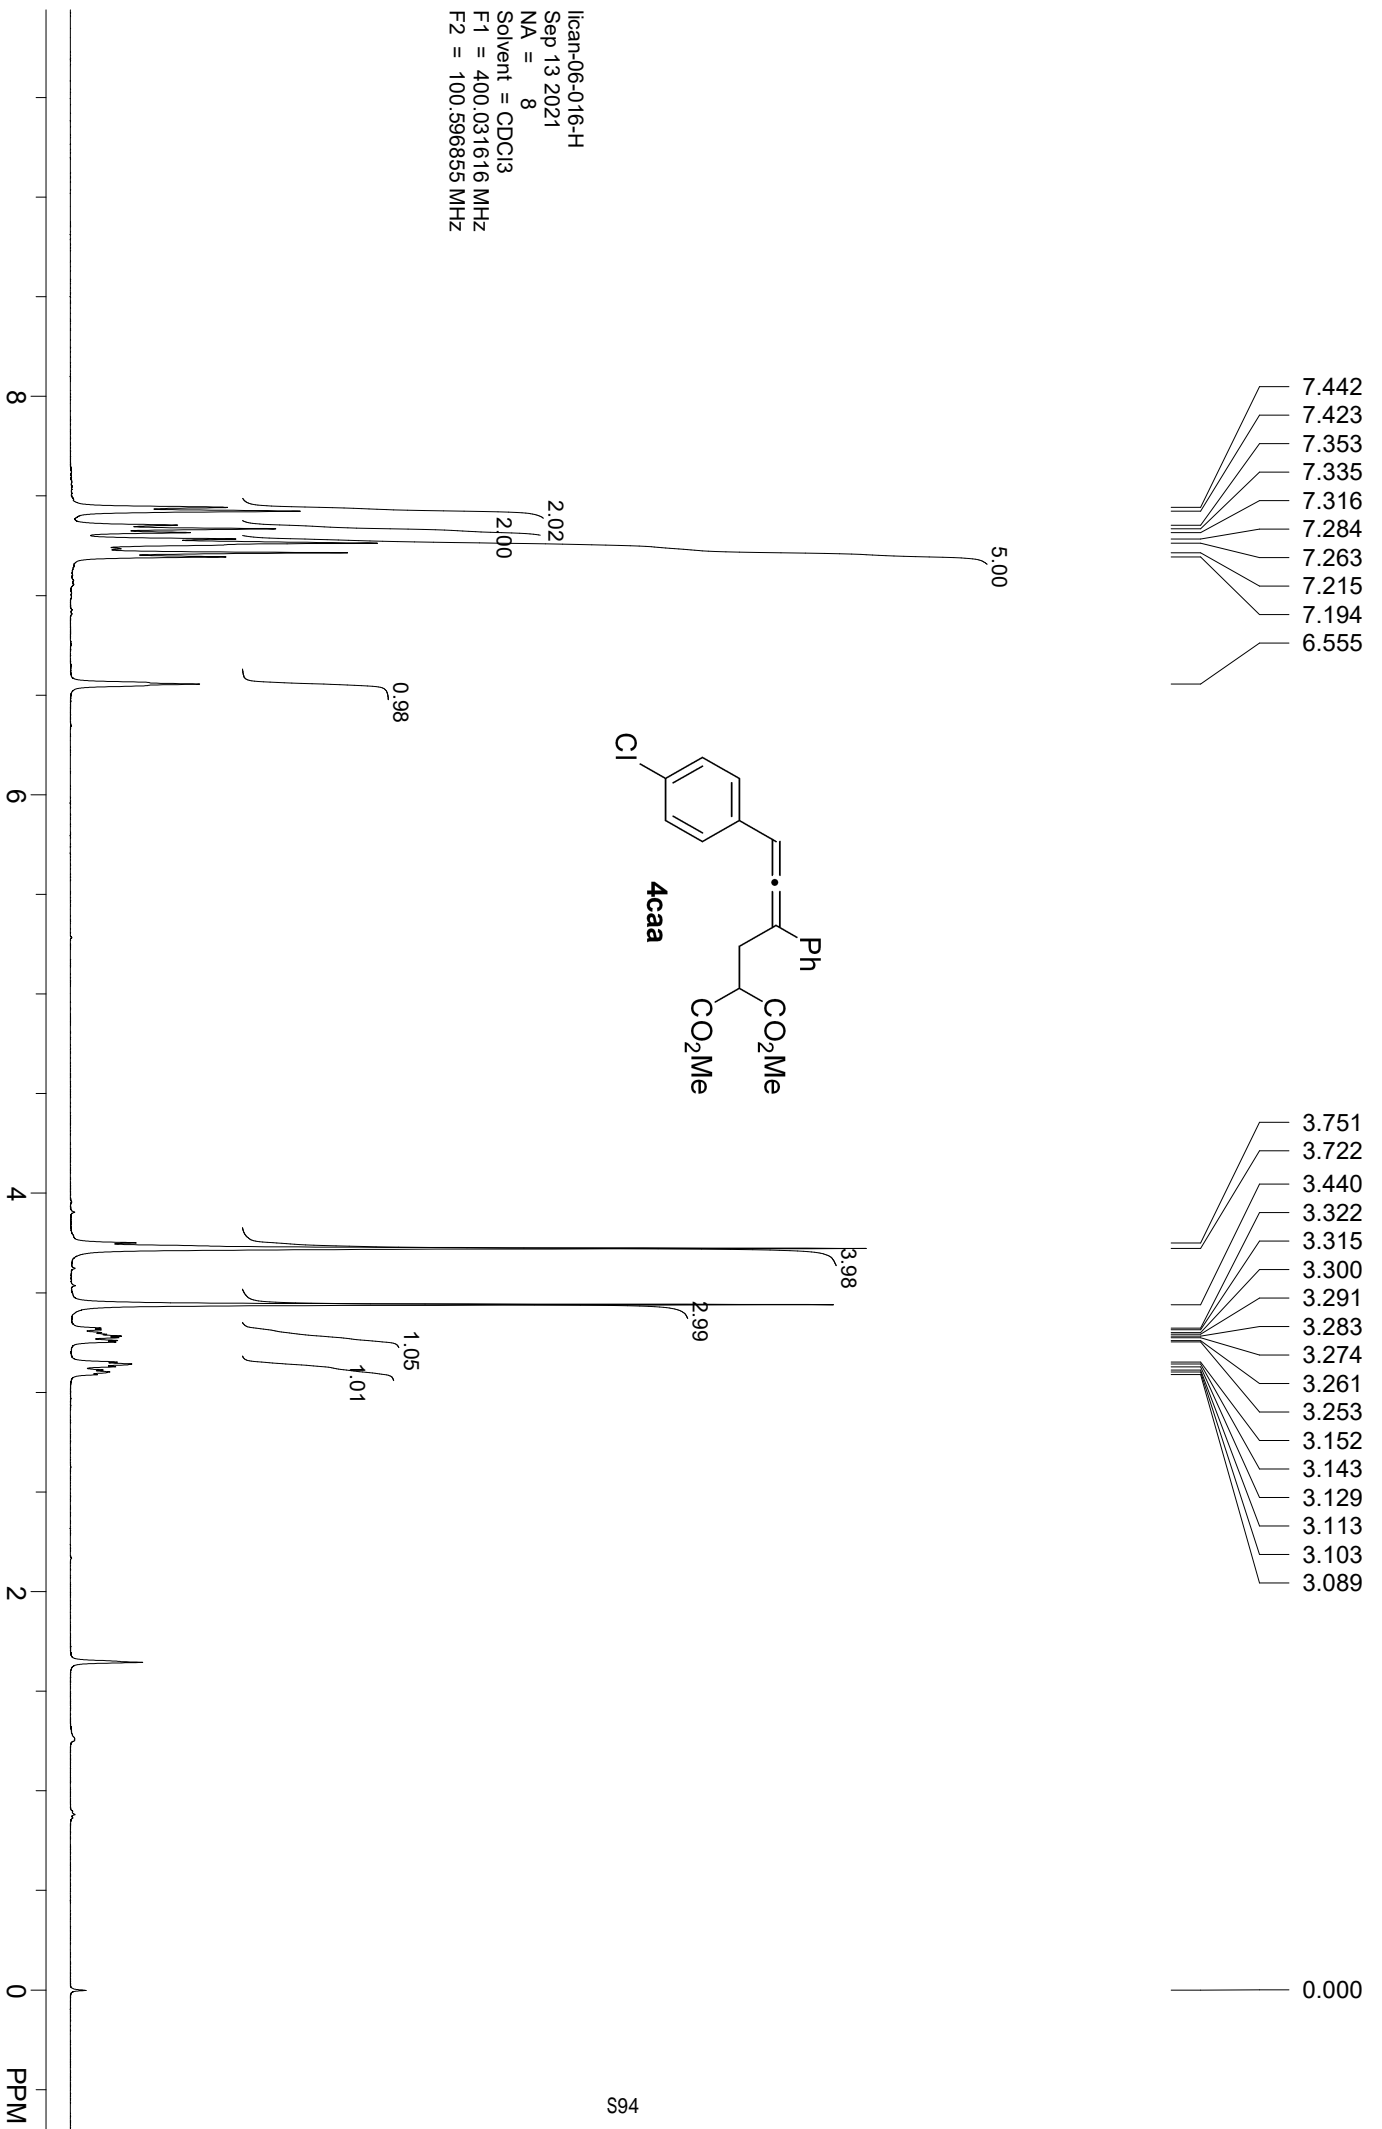

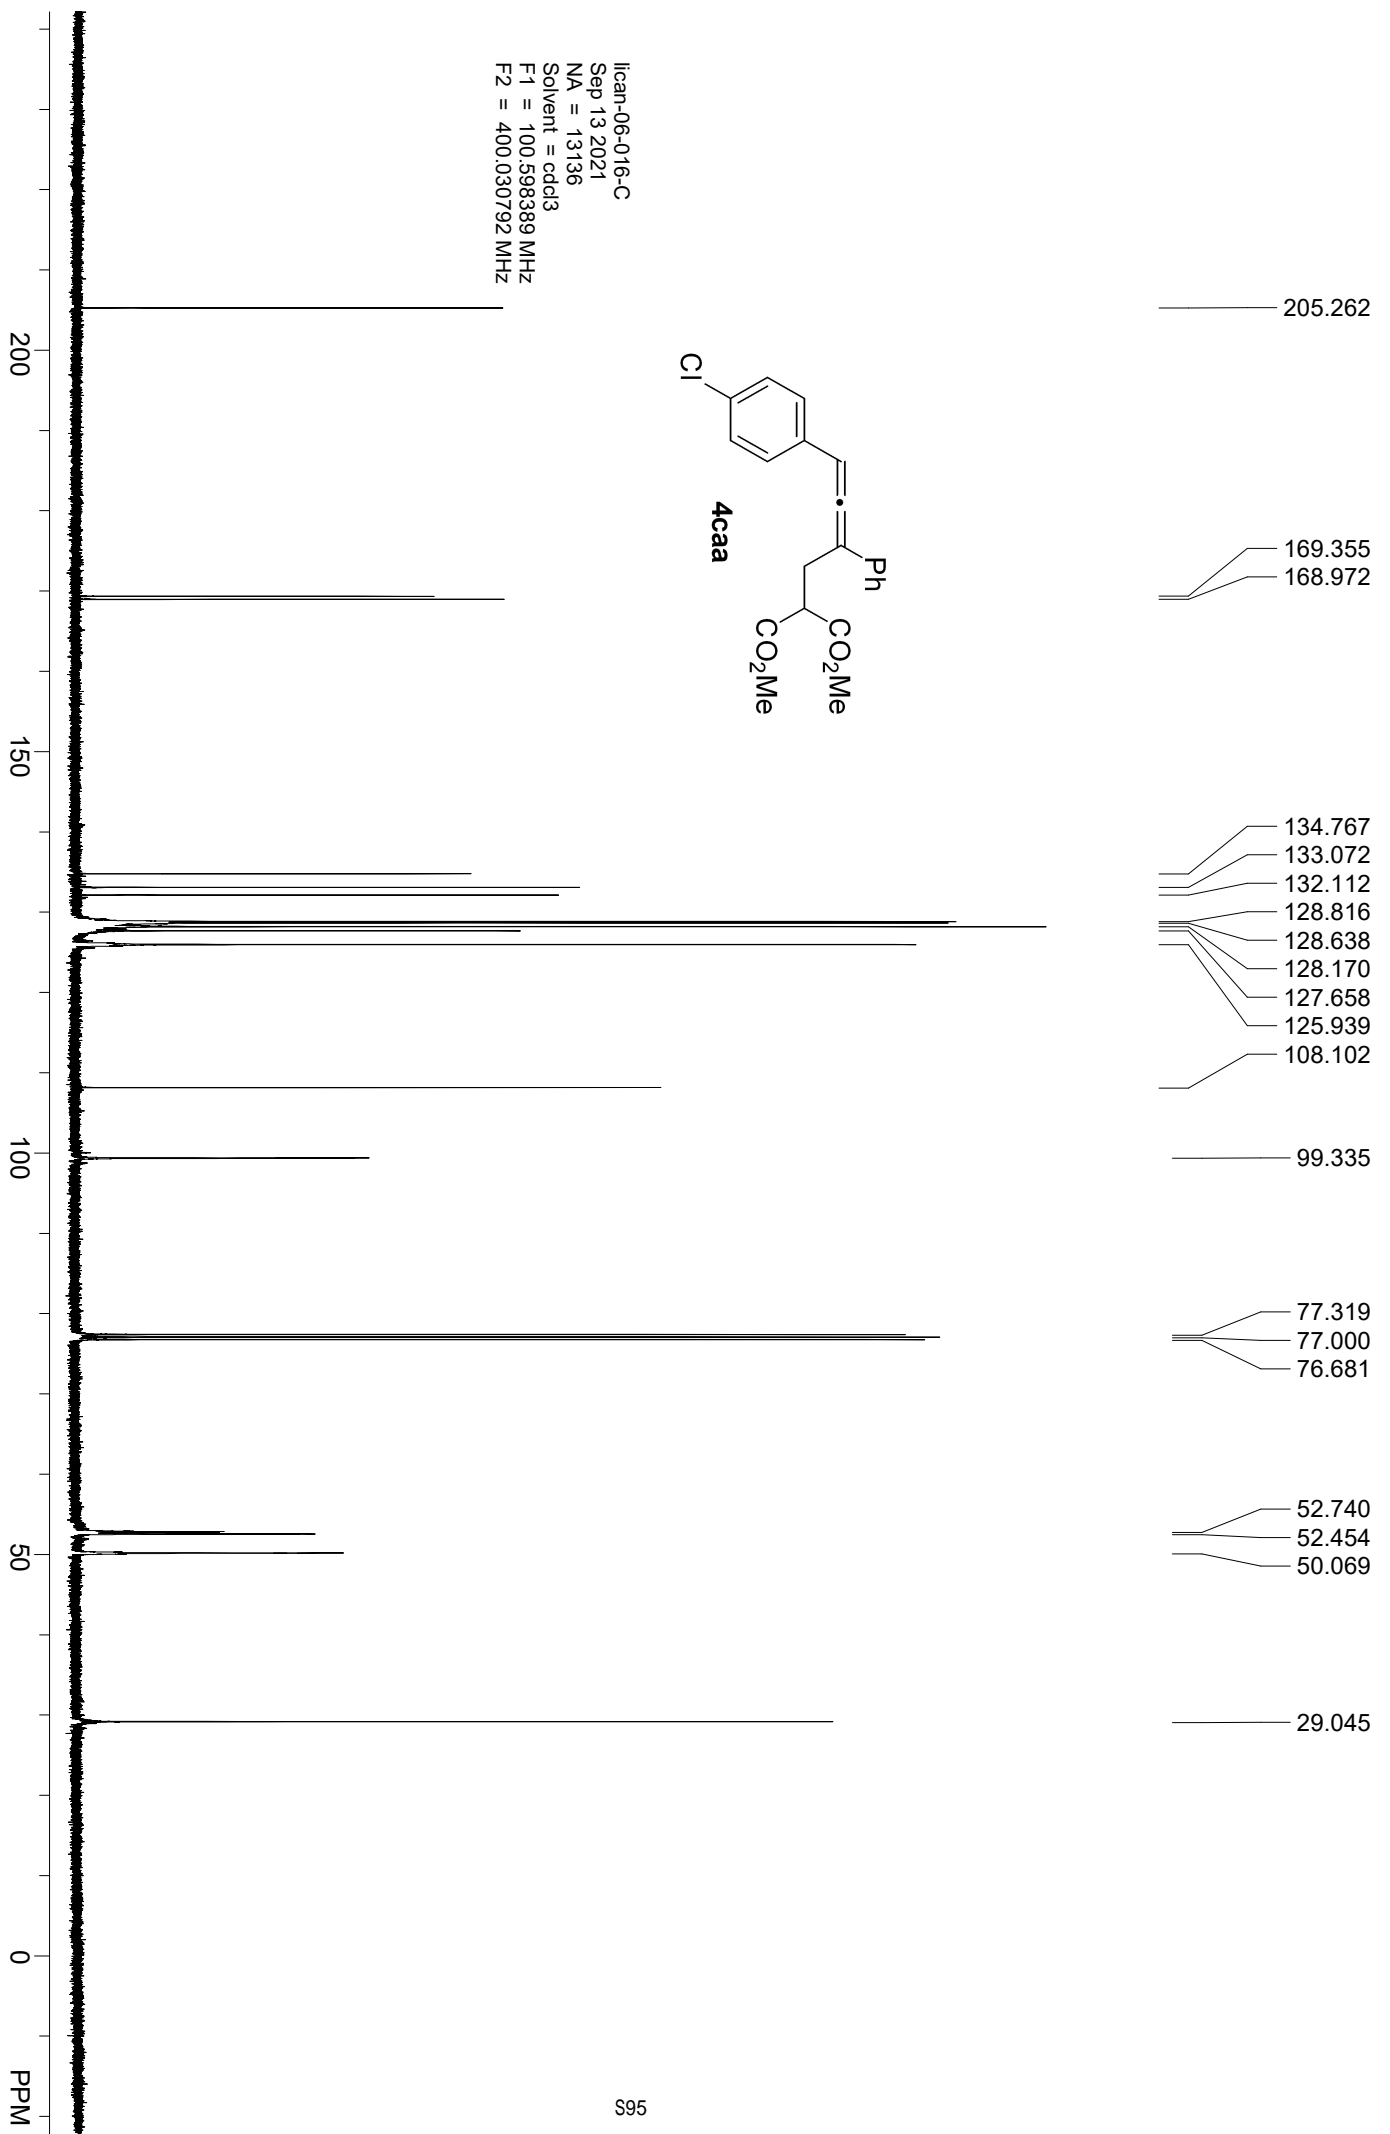

- 7.582
- 7.561
- 7.434
- 7.416
- 7.375
- 7.355
- 7.336
- 7.317
- 7.277
- 7.258
- 7.240
- 6.627
- 6.619
- 6.610

- 3.750
- 3.735
- 3.728
- 3.715
- 3.433
- 3.353
- 3.344
- 3.331
- 3.322
- 3.313
- 3.304
- 3.291
- 3.282
- 3.181
- 3.172
- 3.167
- 3.157
- 3.141
- 3.132
- 3.127
- 3.118

0.000

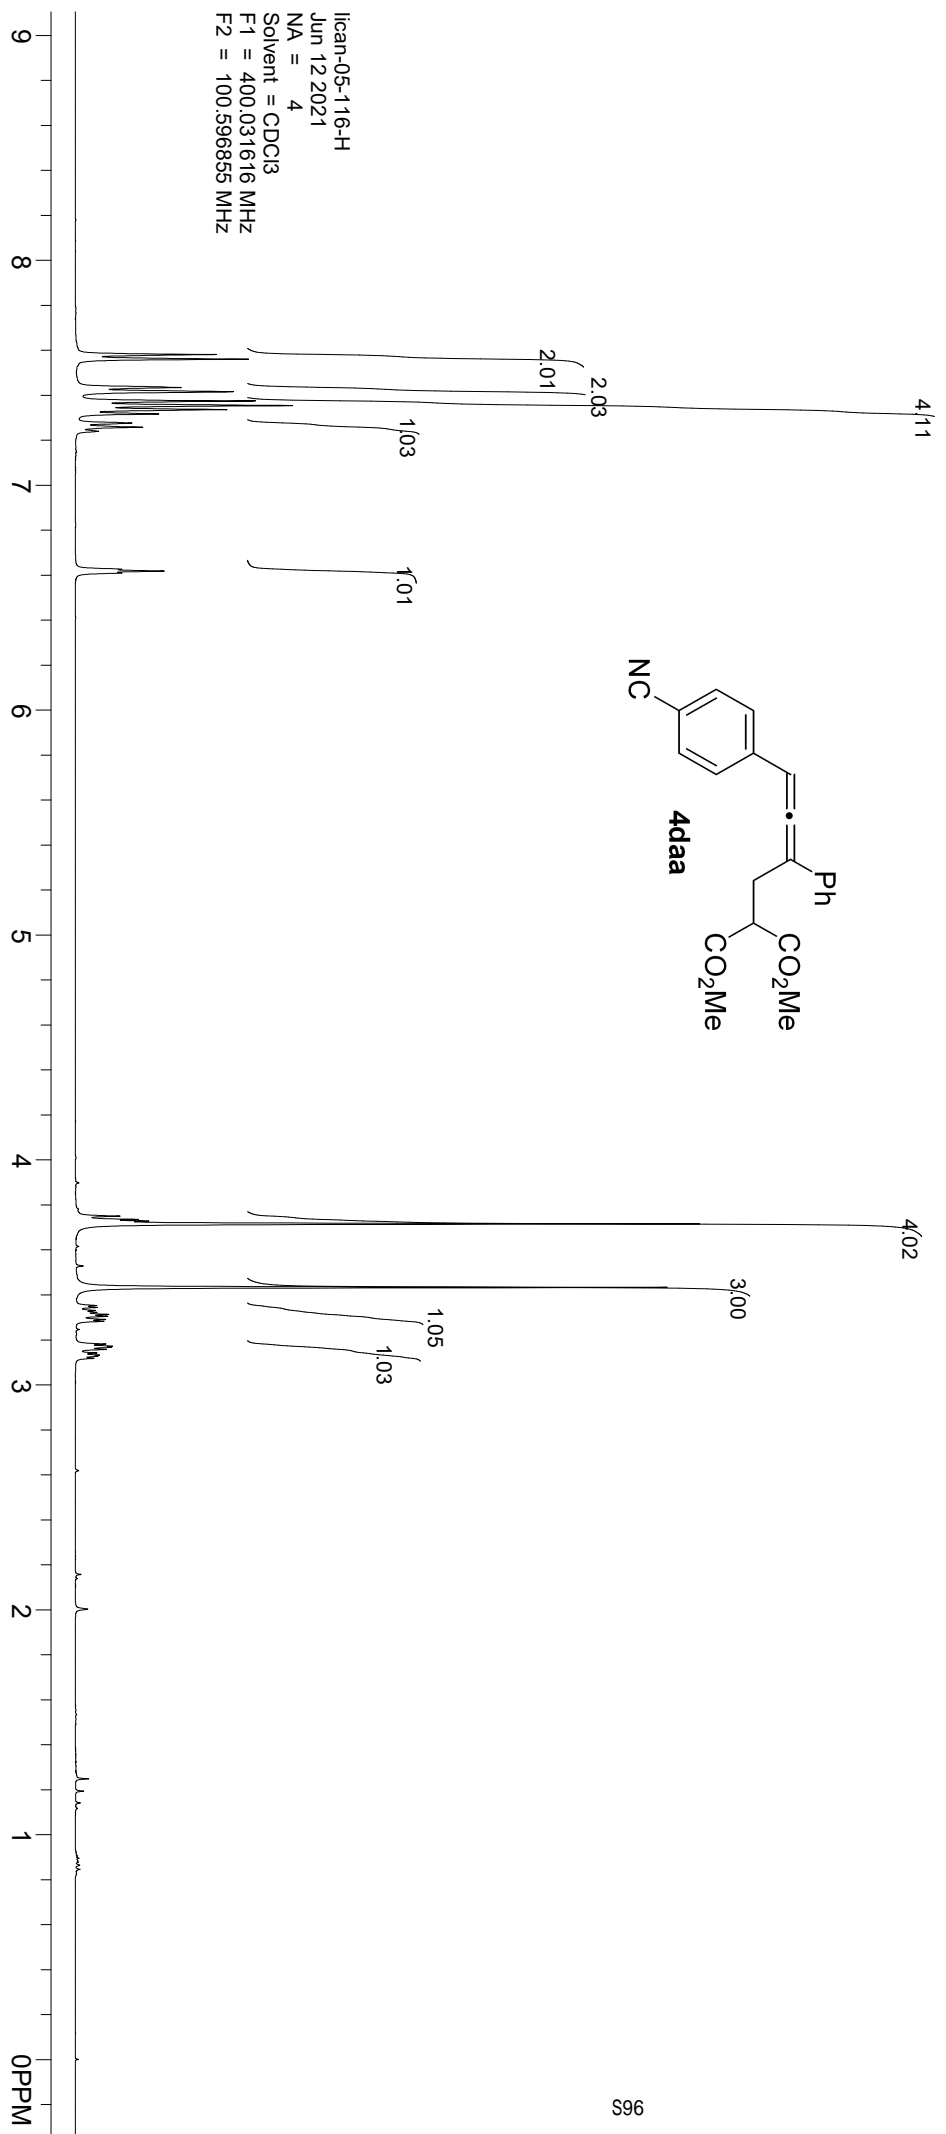



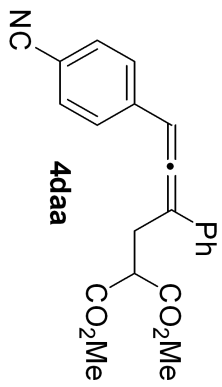

lican-05-116-purity  
Jun 12 2021  
purity = 95%  
187.2 mg product with 35 uL dibromomethane  
NA = 4  
Solvent = CDCl3  
F1 = 399.723236 MHz  
F2 = 100.519203 MHz

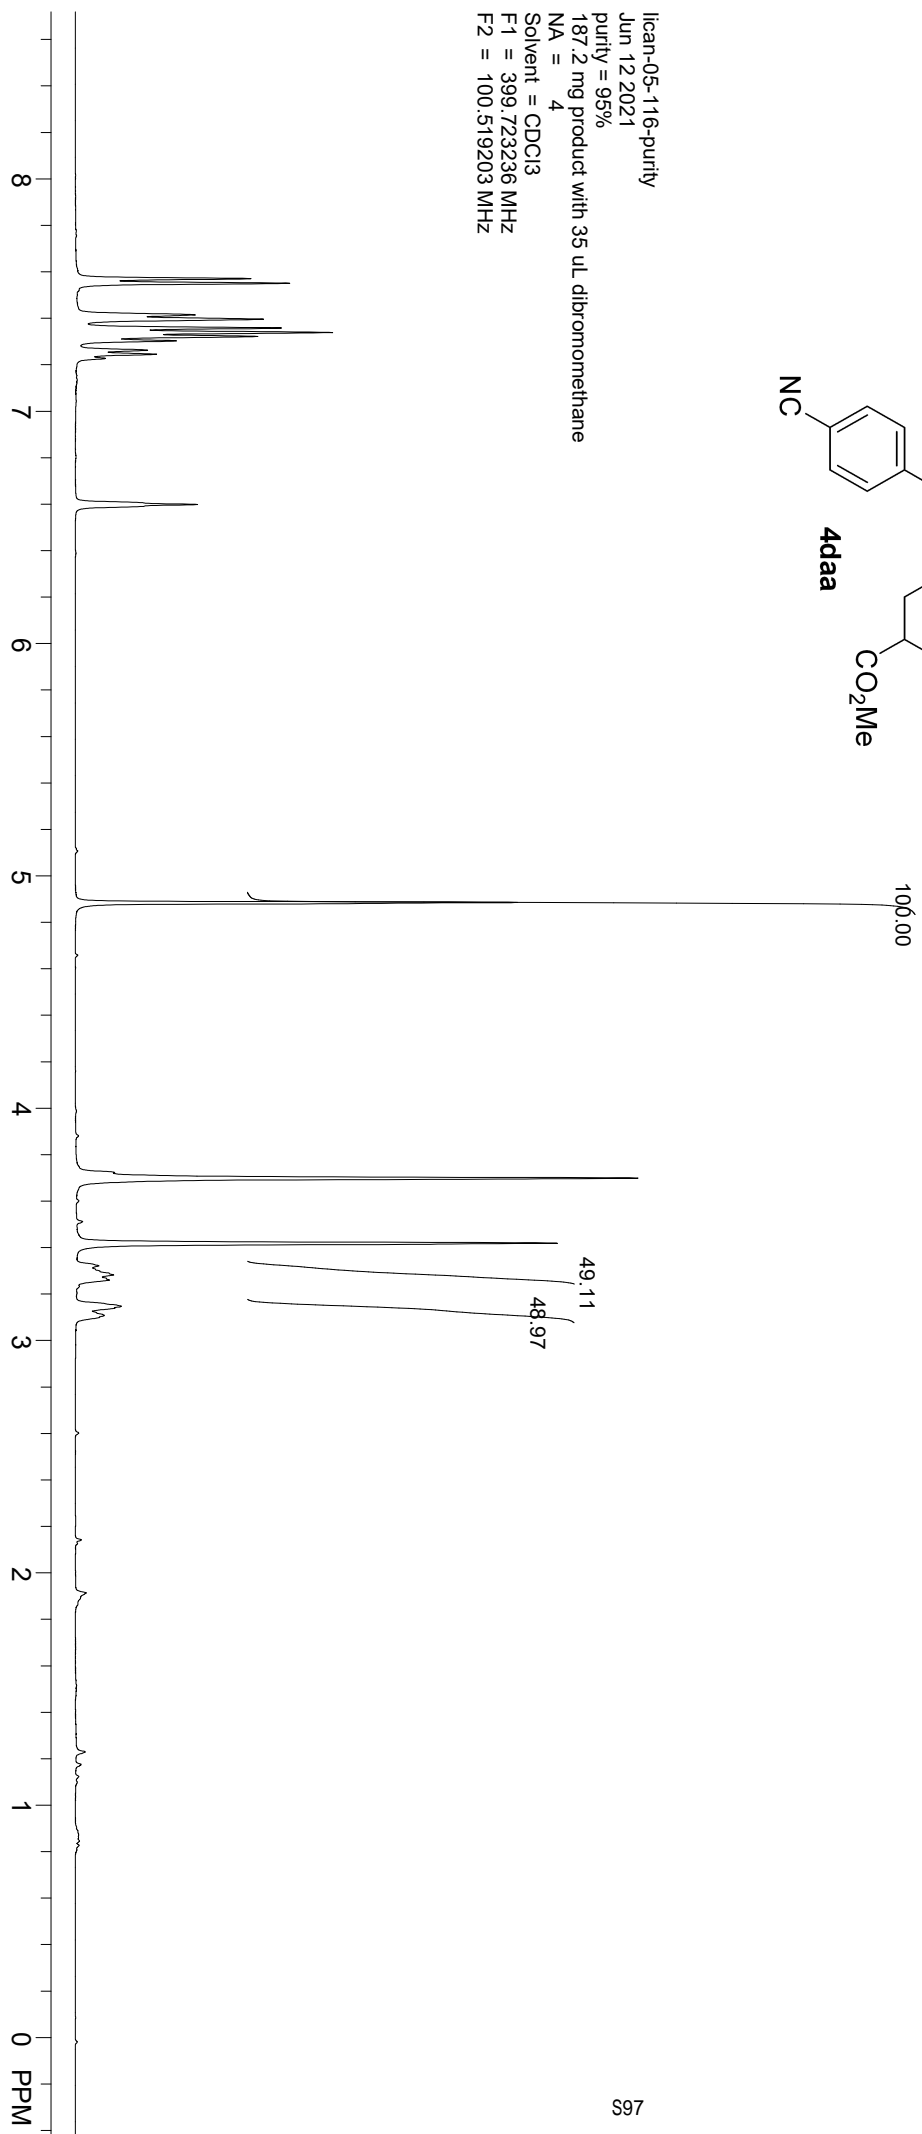

llican-05-116-C  
Jun 12 2021  
NA = 100  
Solvent = cdcl3  
F1 = 100.520737 MHz  
F2 = 399.722015 MHz

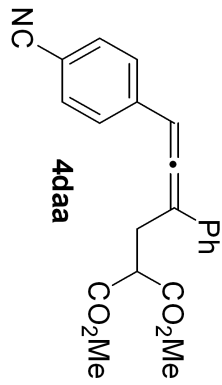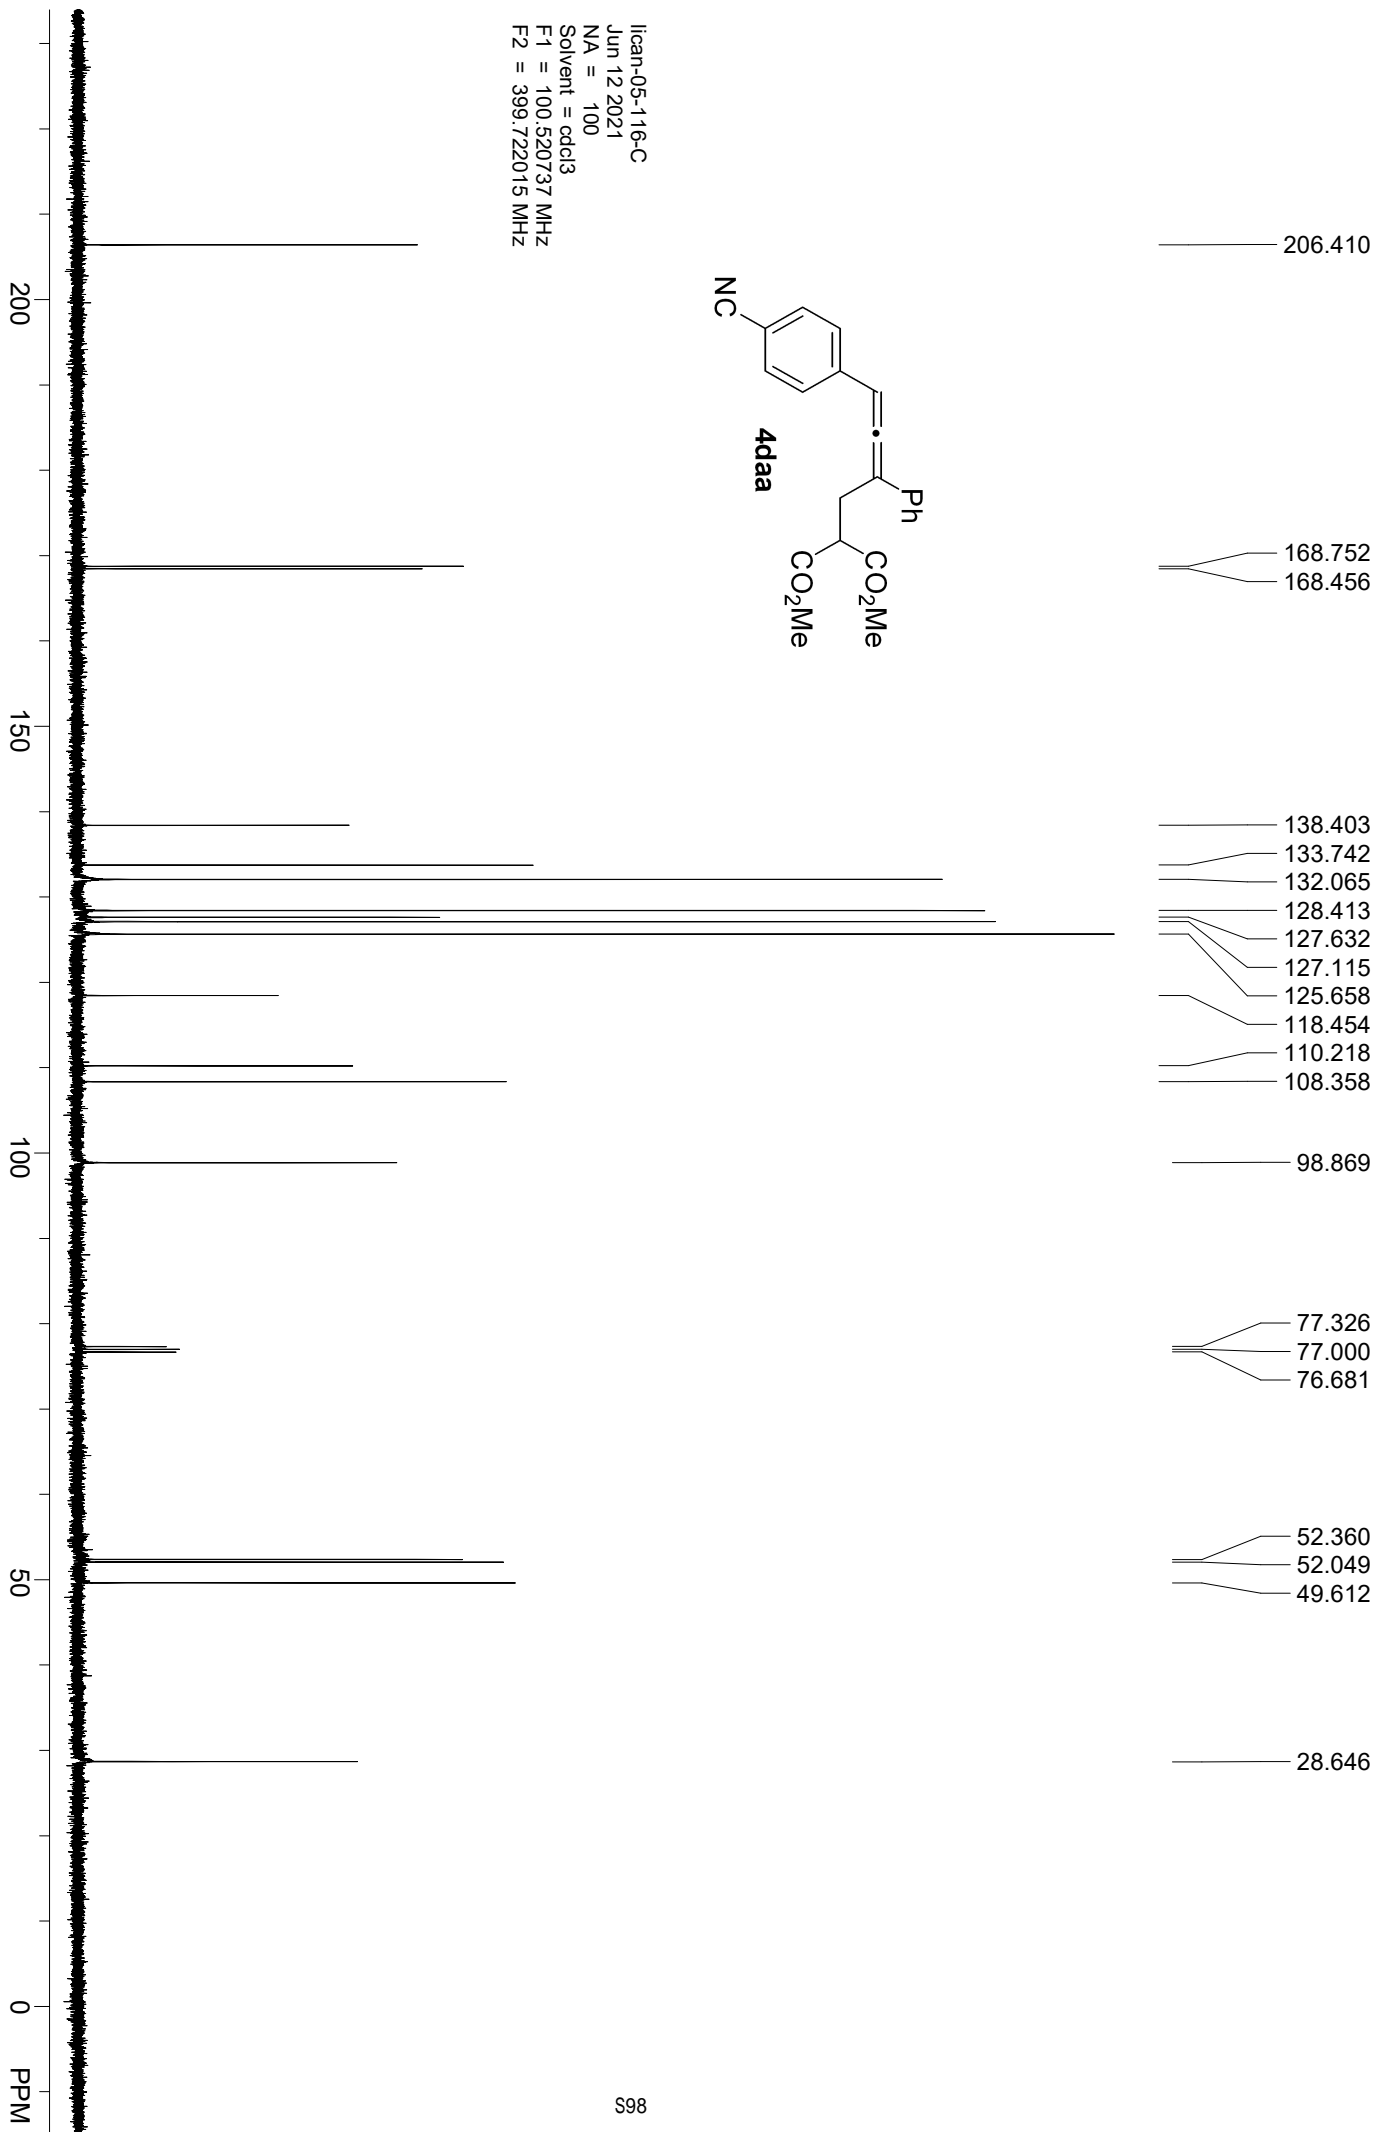

llican-06-034-H  
Sep 23 2021  
NA = 8  
Solvent = CDCl3  
F1 = 399.717865 MHz  
F2 = 100.517960 MHz

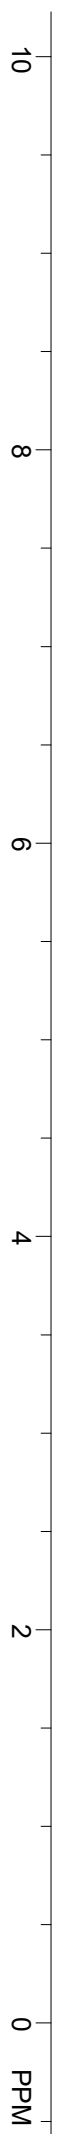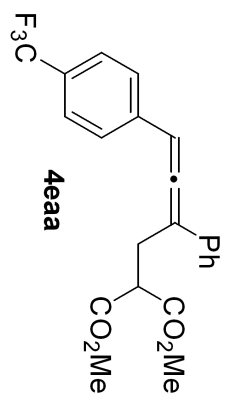

- 7.568
- 7.547
- 7.451
- 7.432
- 7.395
- 7.374
- 7.365
- 7.347
- 7.327
- 7.286
- 7.268
- 7.249
- 6.630
- 6.621
- 6.613

- 3.753
- 3.739
- 3.725
- 3.433
- 3.343
- 3.334
- 3.321
- 3.312
- 3.302
- 3.294
- 3.281
- 3.273
- 3.182
- 3.173
- 3.168
- 3.158
- 3.142
- 3.133
- 3.128
- 3.118

-0.000

lican-06-034-C  
Sep 28 2021  
NA = 10879  
Solvent = CDCl3  
F1 = 100.630371 MHz  
F2 = 1.000000 MHz

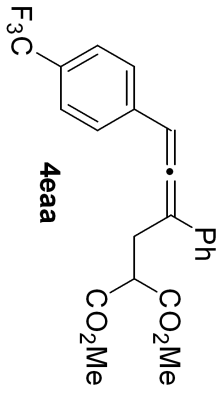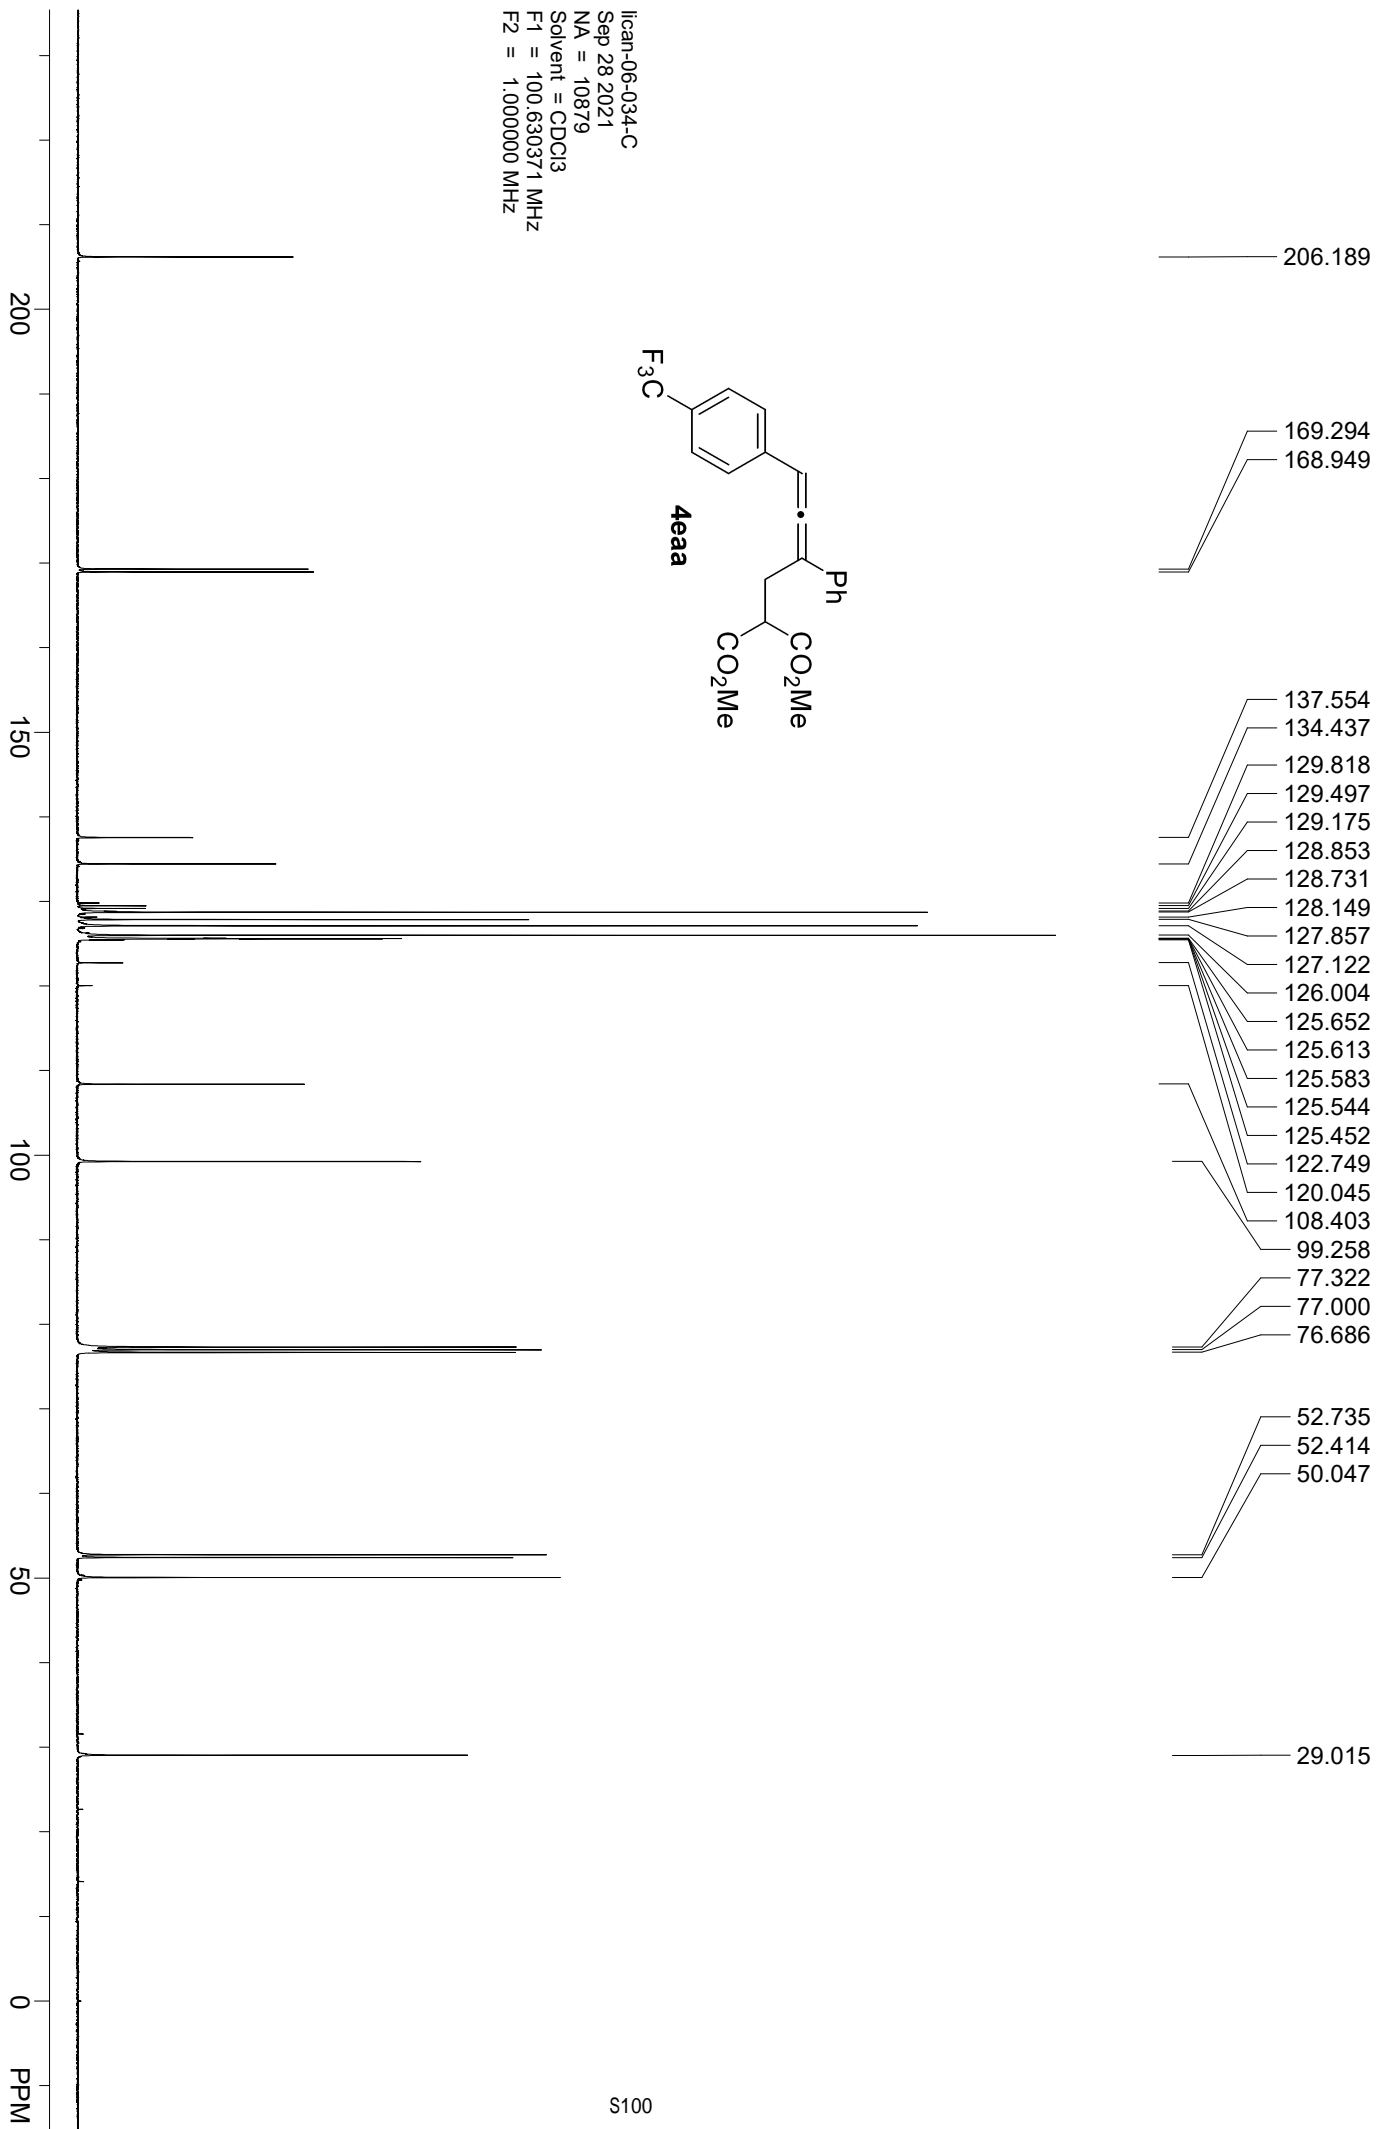

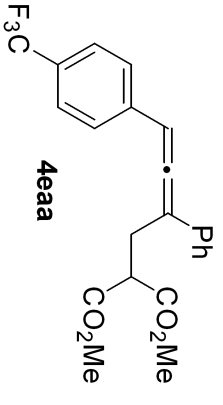

lican-06-034-F  
Sep 23 2021  
NA = 4  
Solvent = CDCl<sub>3</sub>  
F1 = 376.114410 MHz  
F2 = 399.717072 MHz

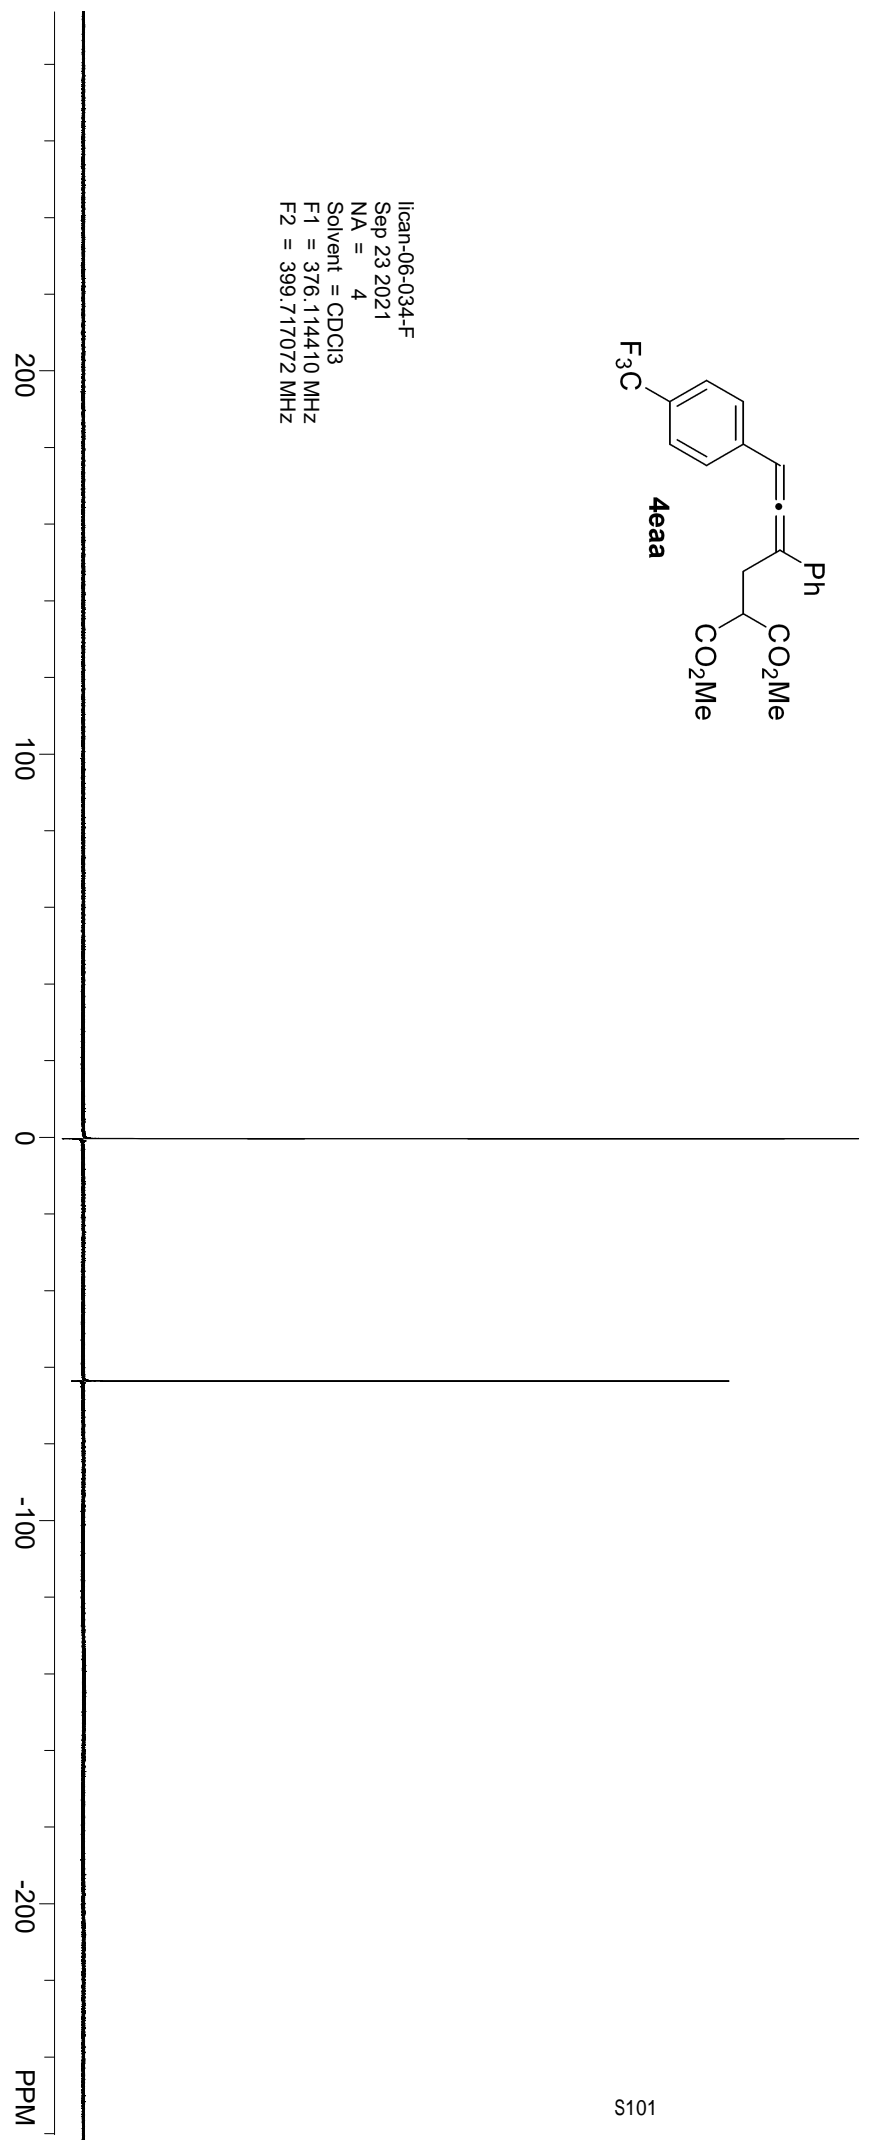

0.000

-63.011

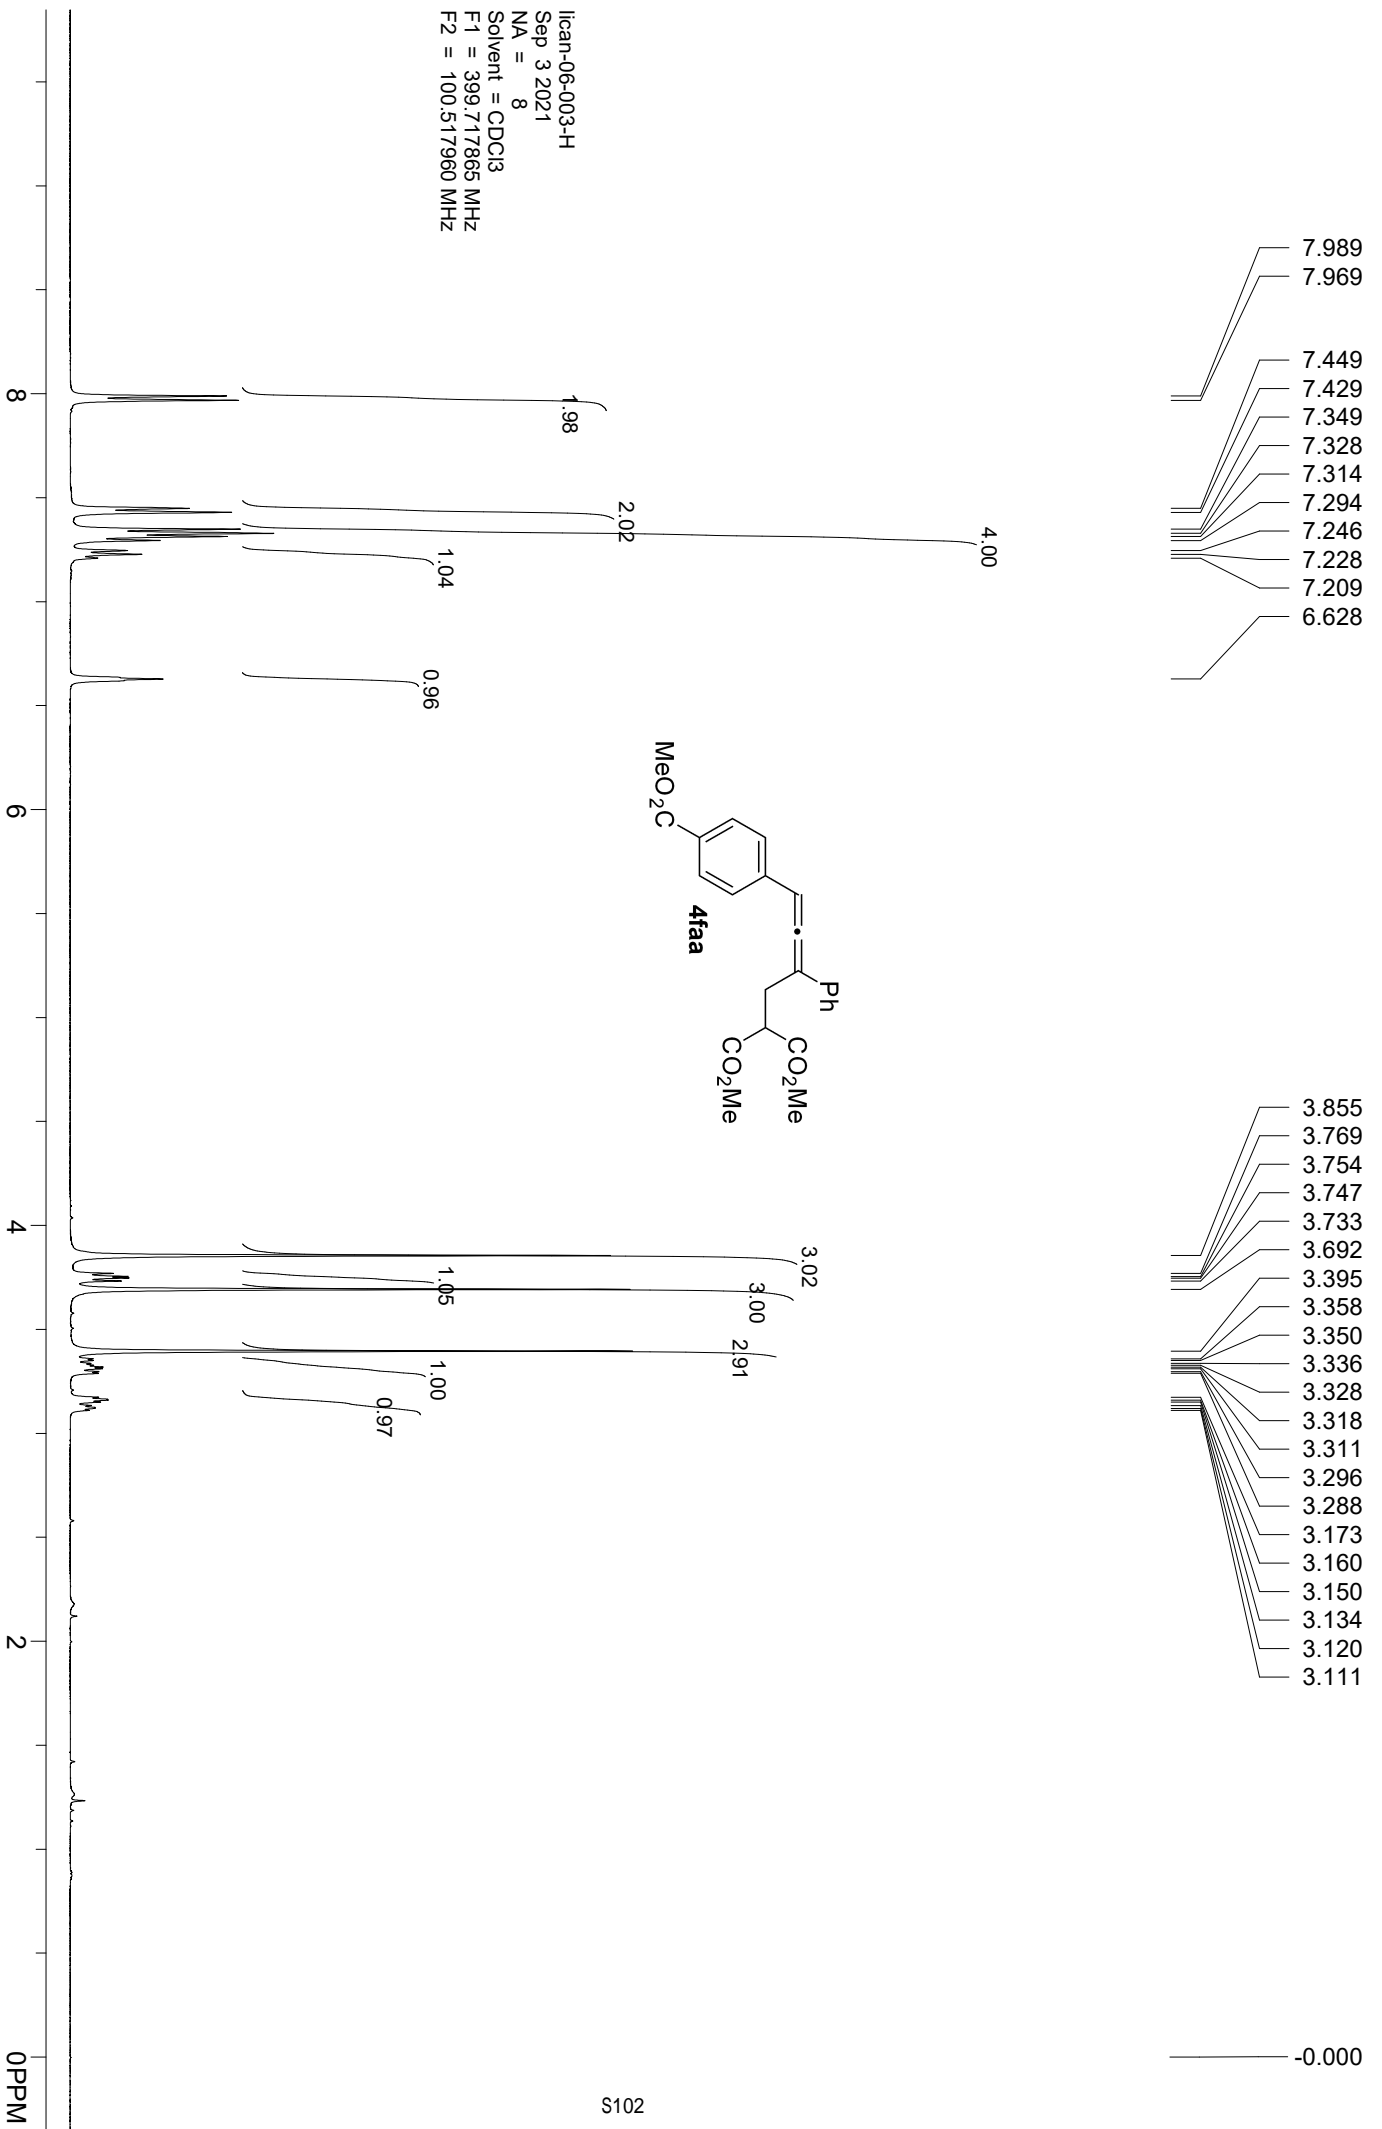

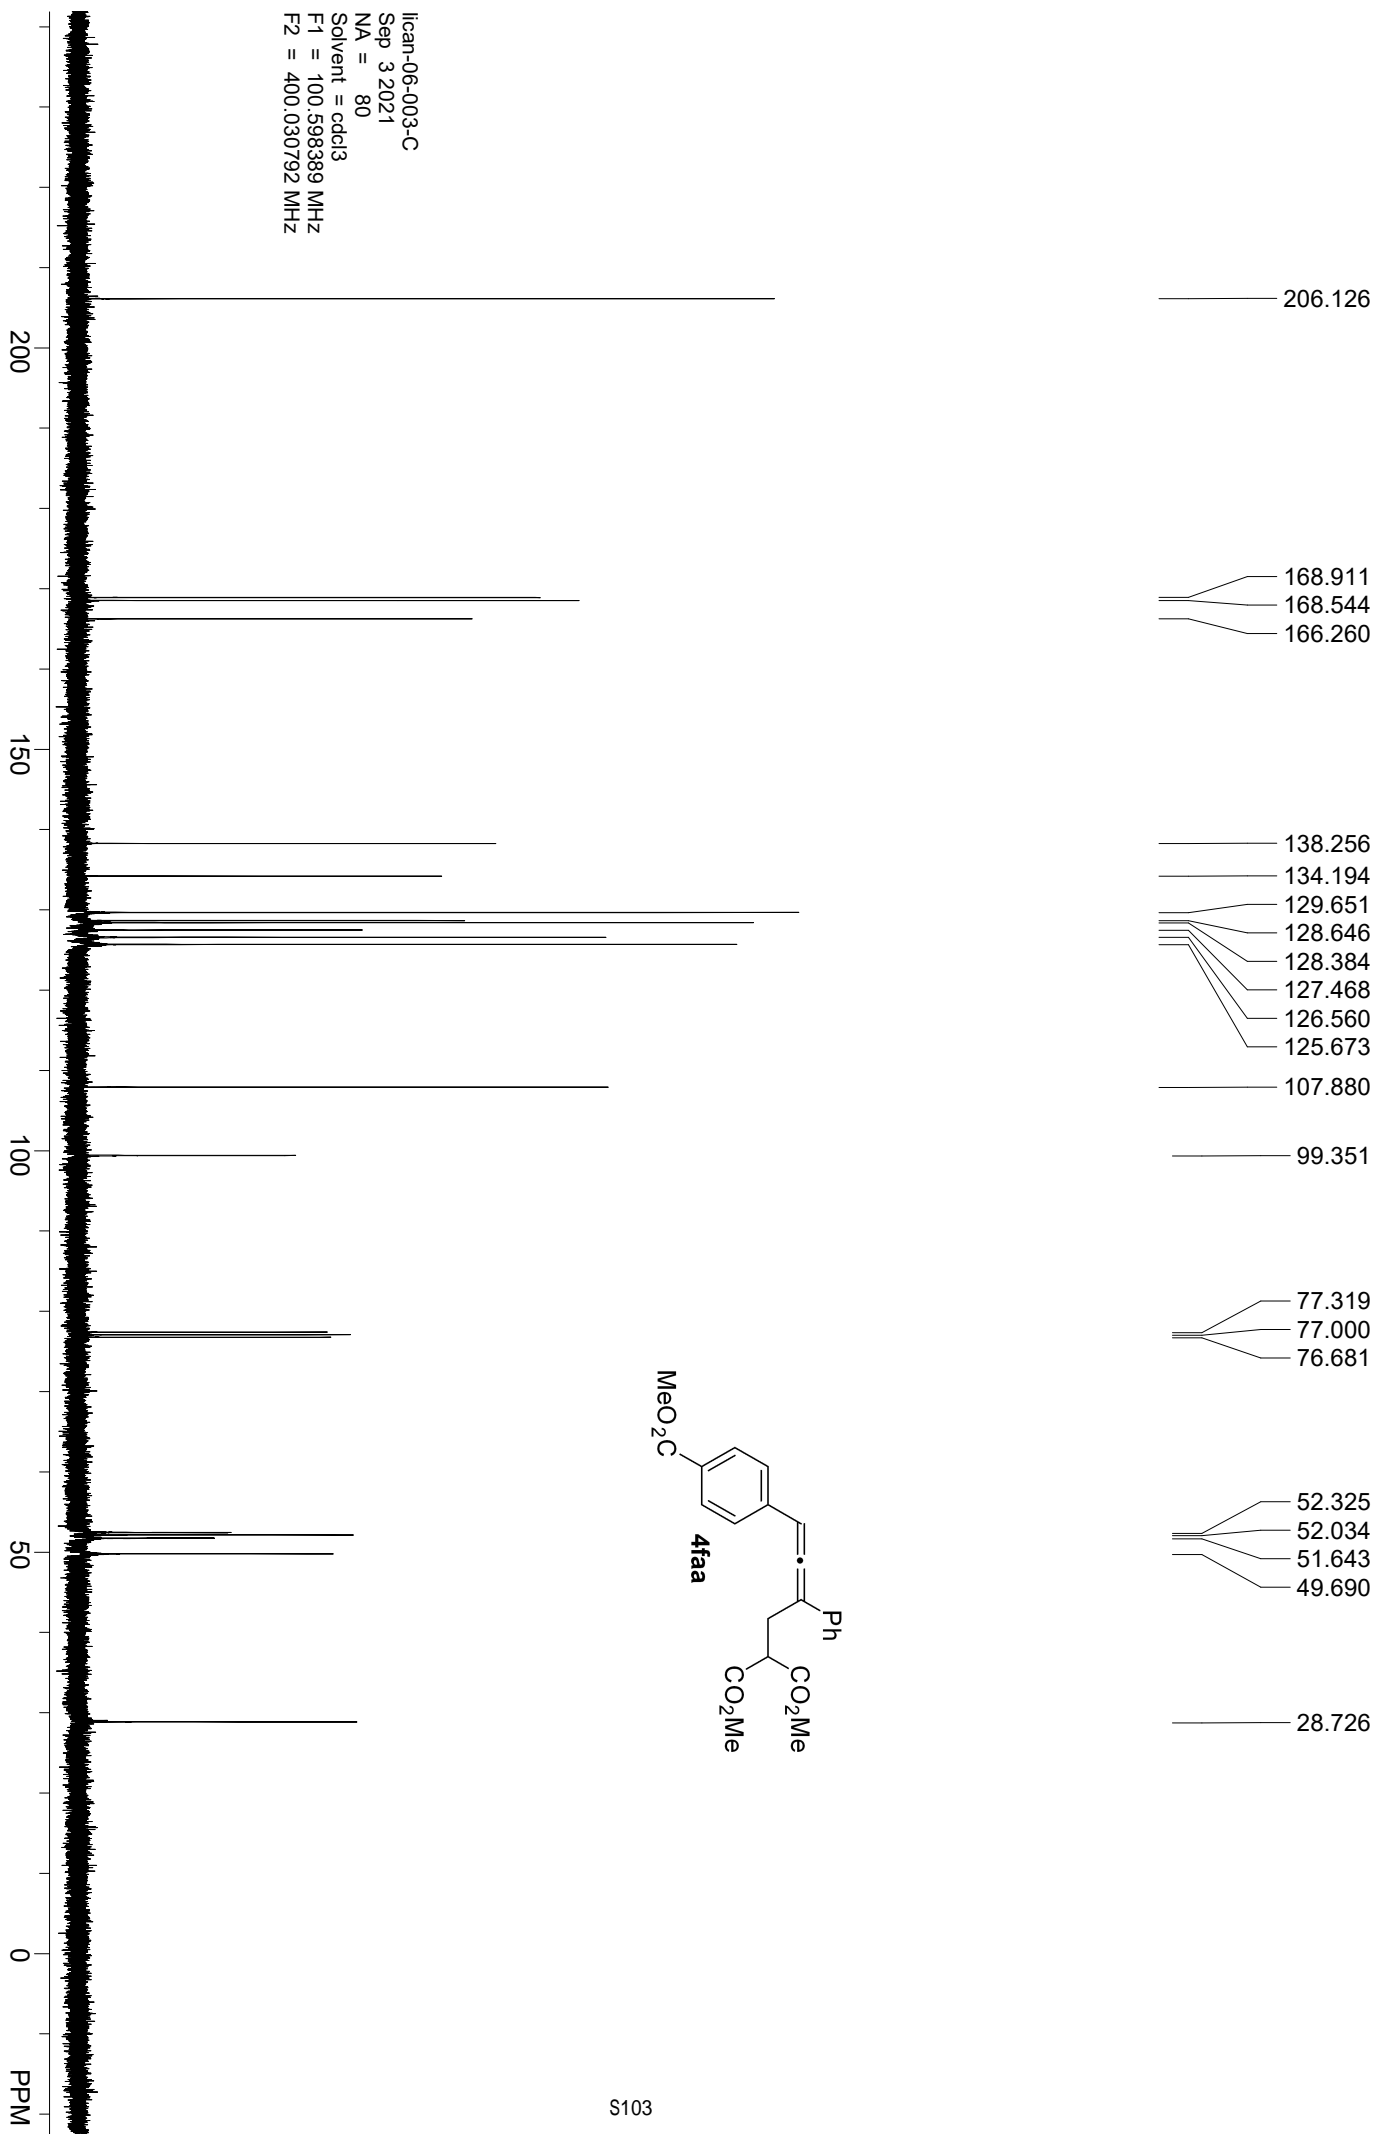

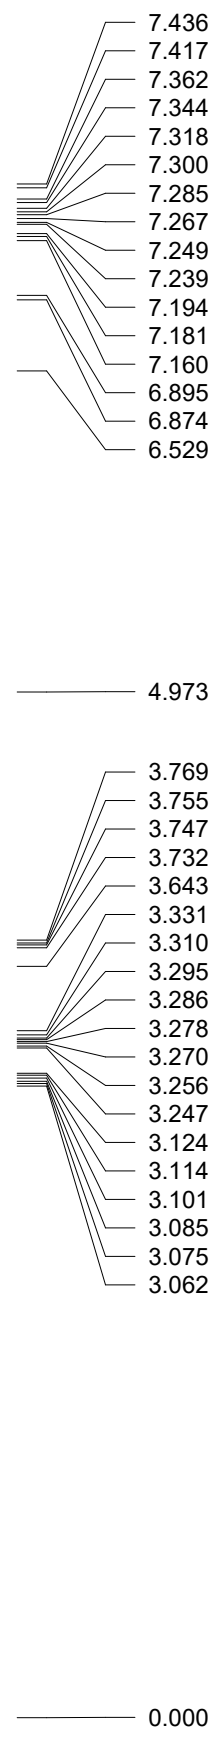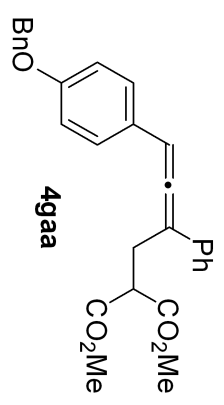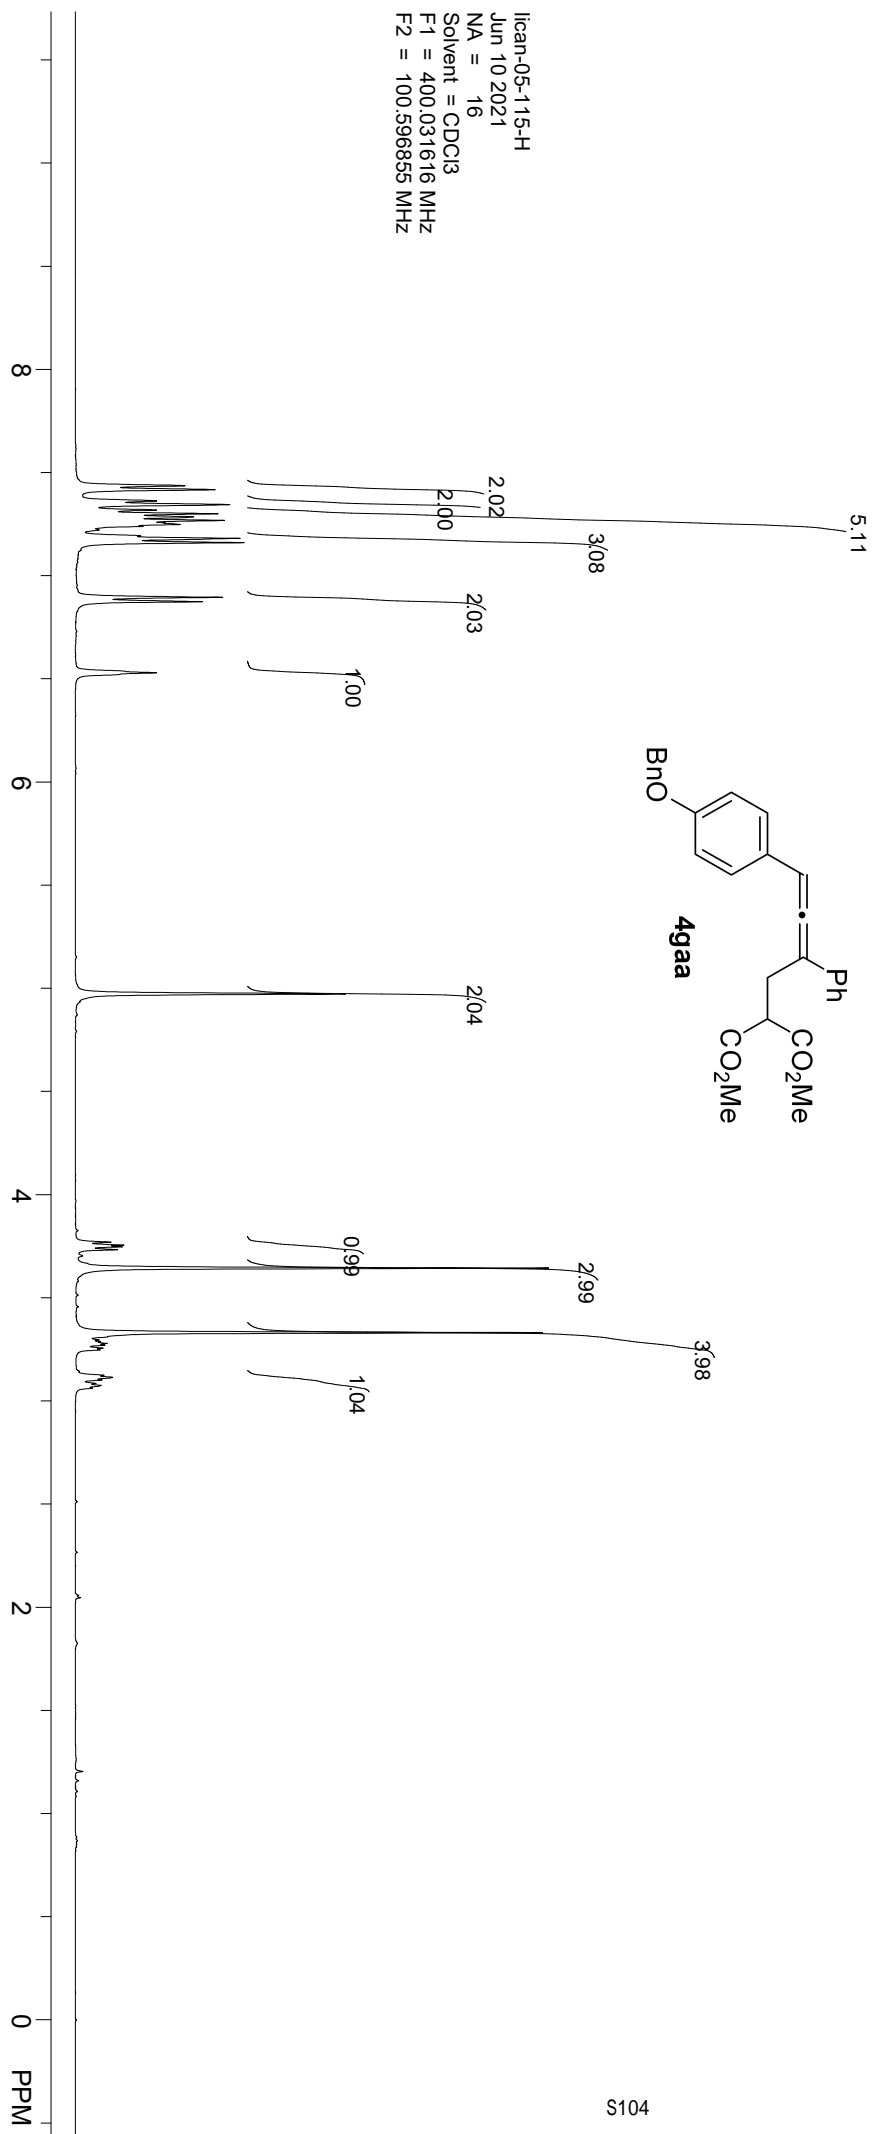

lican-05-115-H  
Jun 10 2021  
NA = 16  
Solvent = CDCl<sub>3</sub>  
F1 = 400.031616 MHz  
F2 = 100.596855 MHz



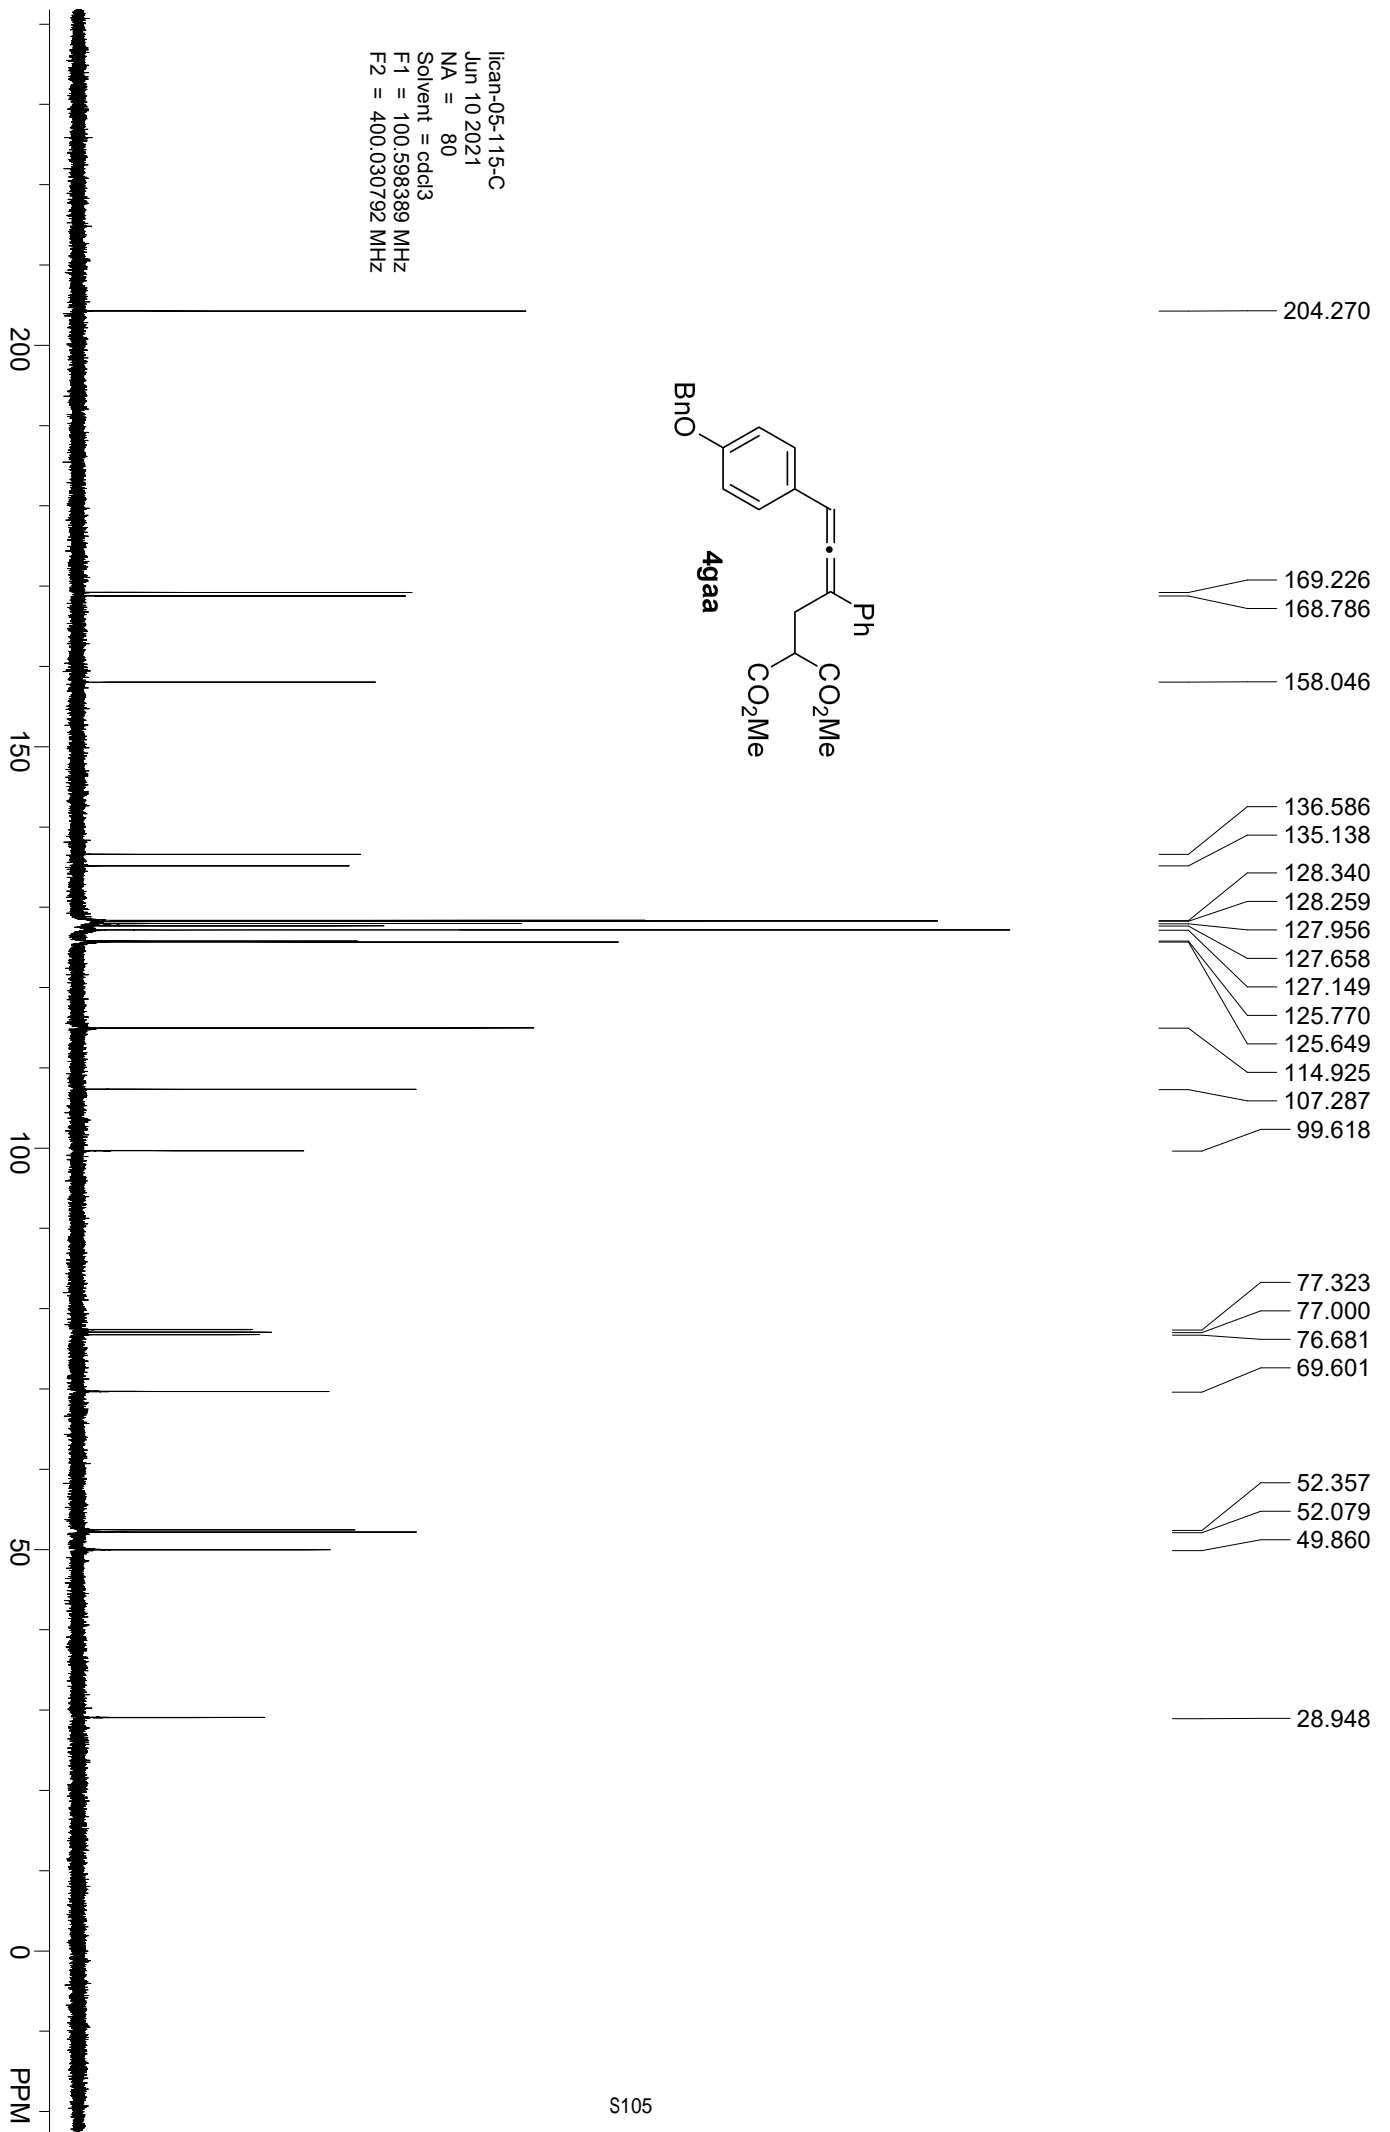

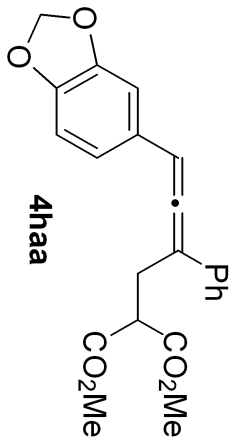

z2n-1-090-H  
 Oct 28 2021  
 NA = 16  
 Solvent = CDCl3  
 F1 = 400.100006 MHz  
 F2 = 1.000000 MHz

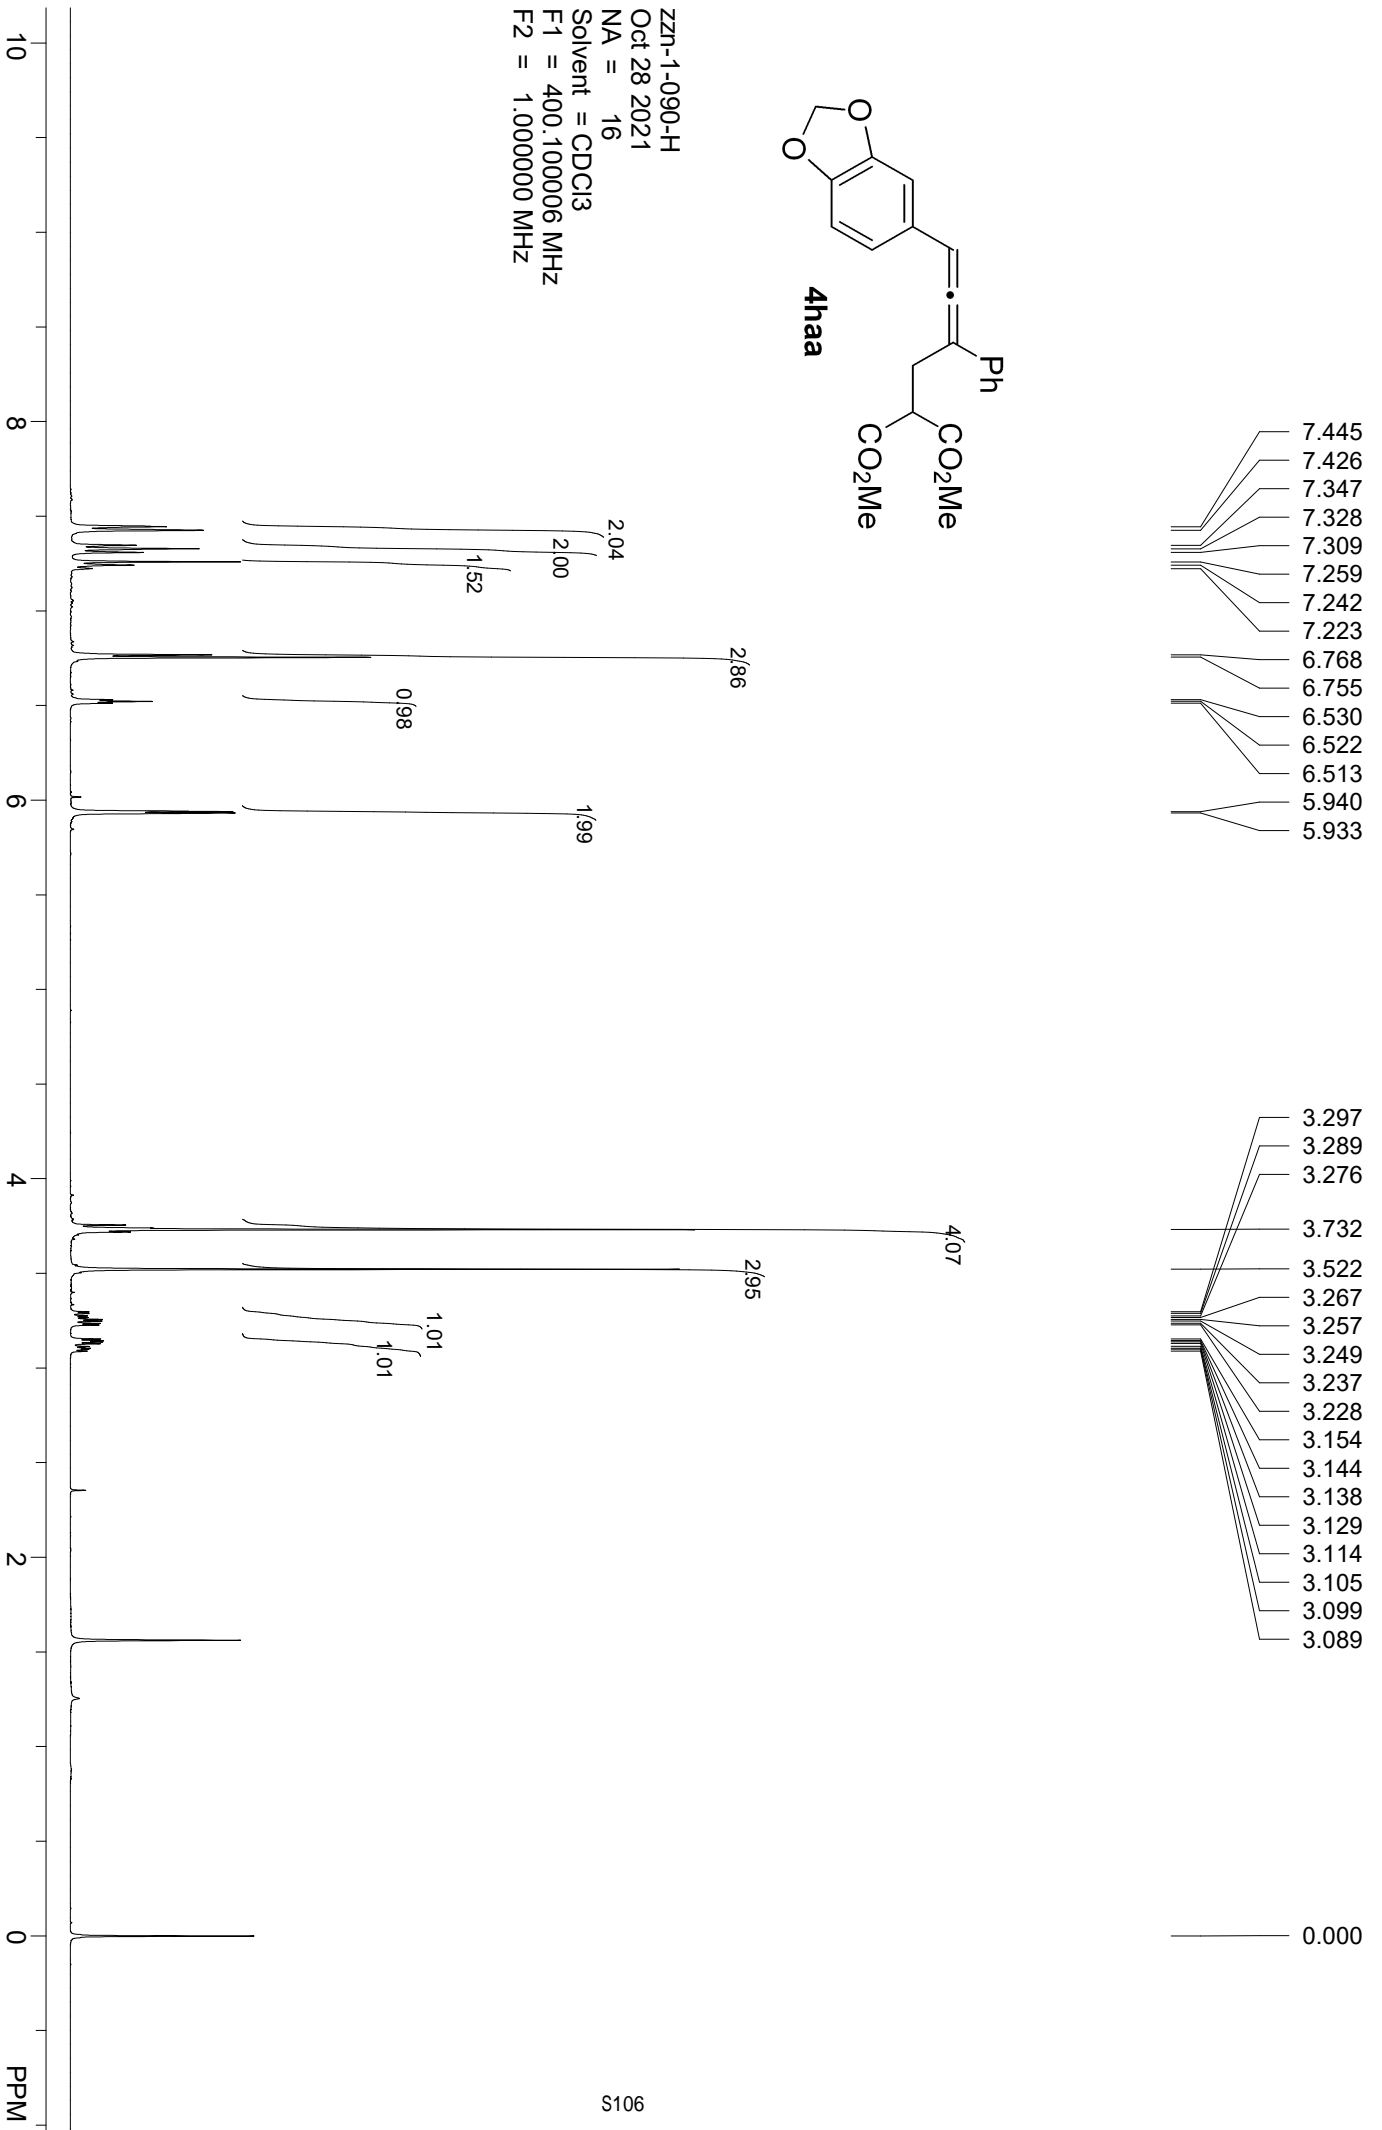

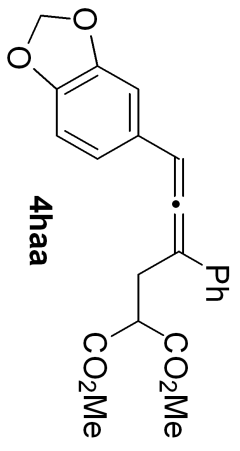

zzn-1-090-purity  
32.2mg product with 35µL CH<sub>2</sub>Br<sub>2</sub>  
Oct 26 2021  
SOLVENT: CDCl<sub>3</sub>  
NA = 4  
F1 = 399.717865 MHz

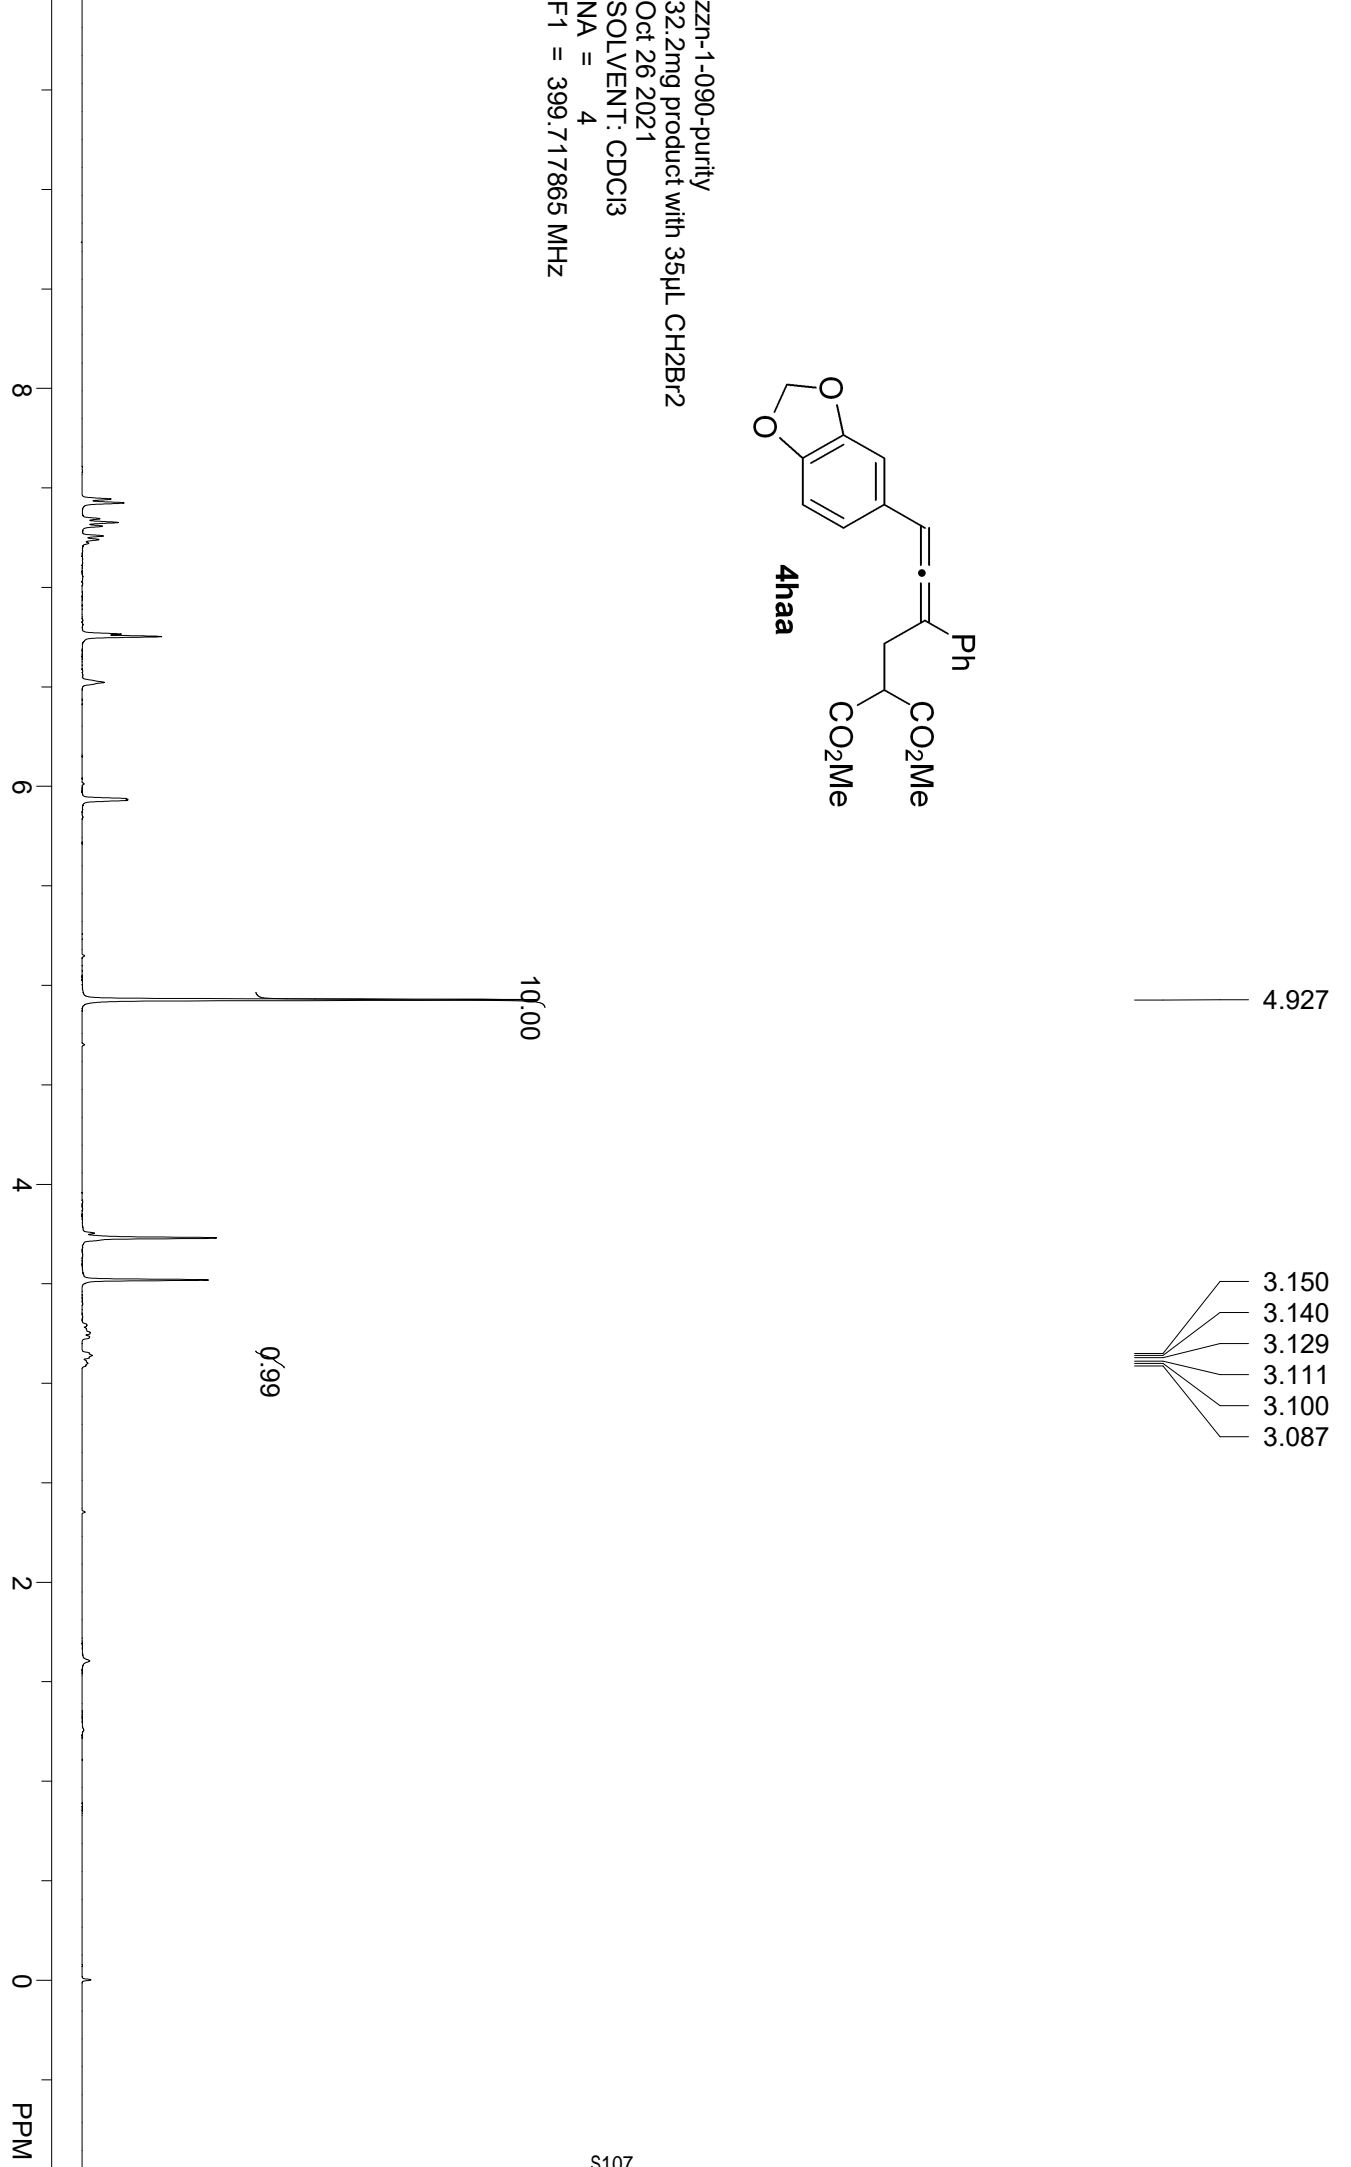

zzn-1-090-C  
Oct 28 2021  
NA = 1024  
Solvent = CDCl3  
F1 = 100.605225 MHz  
F2 = 1.000000 MHz

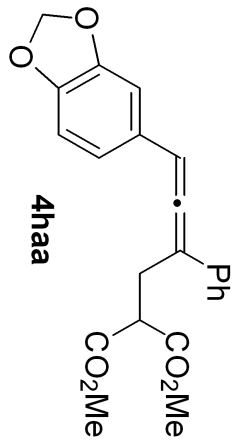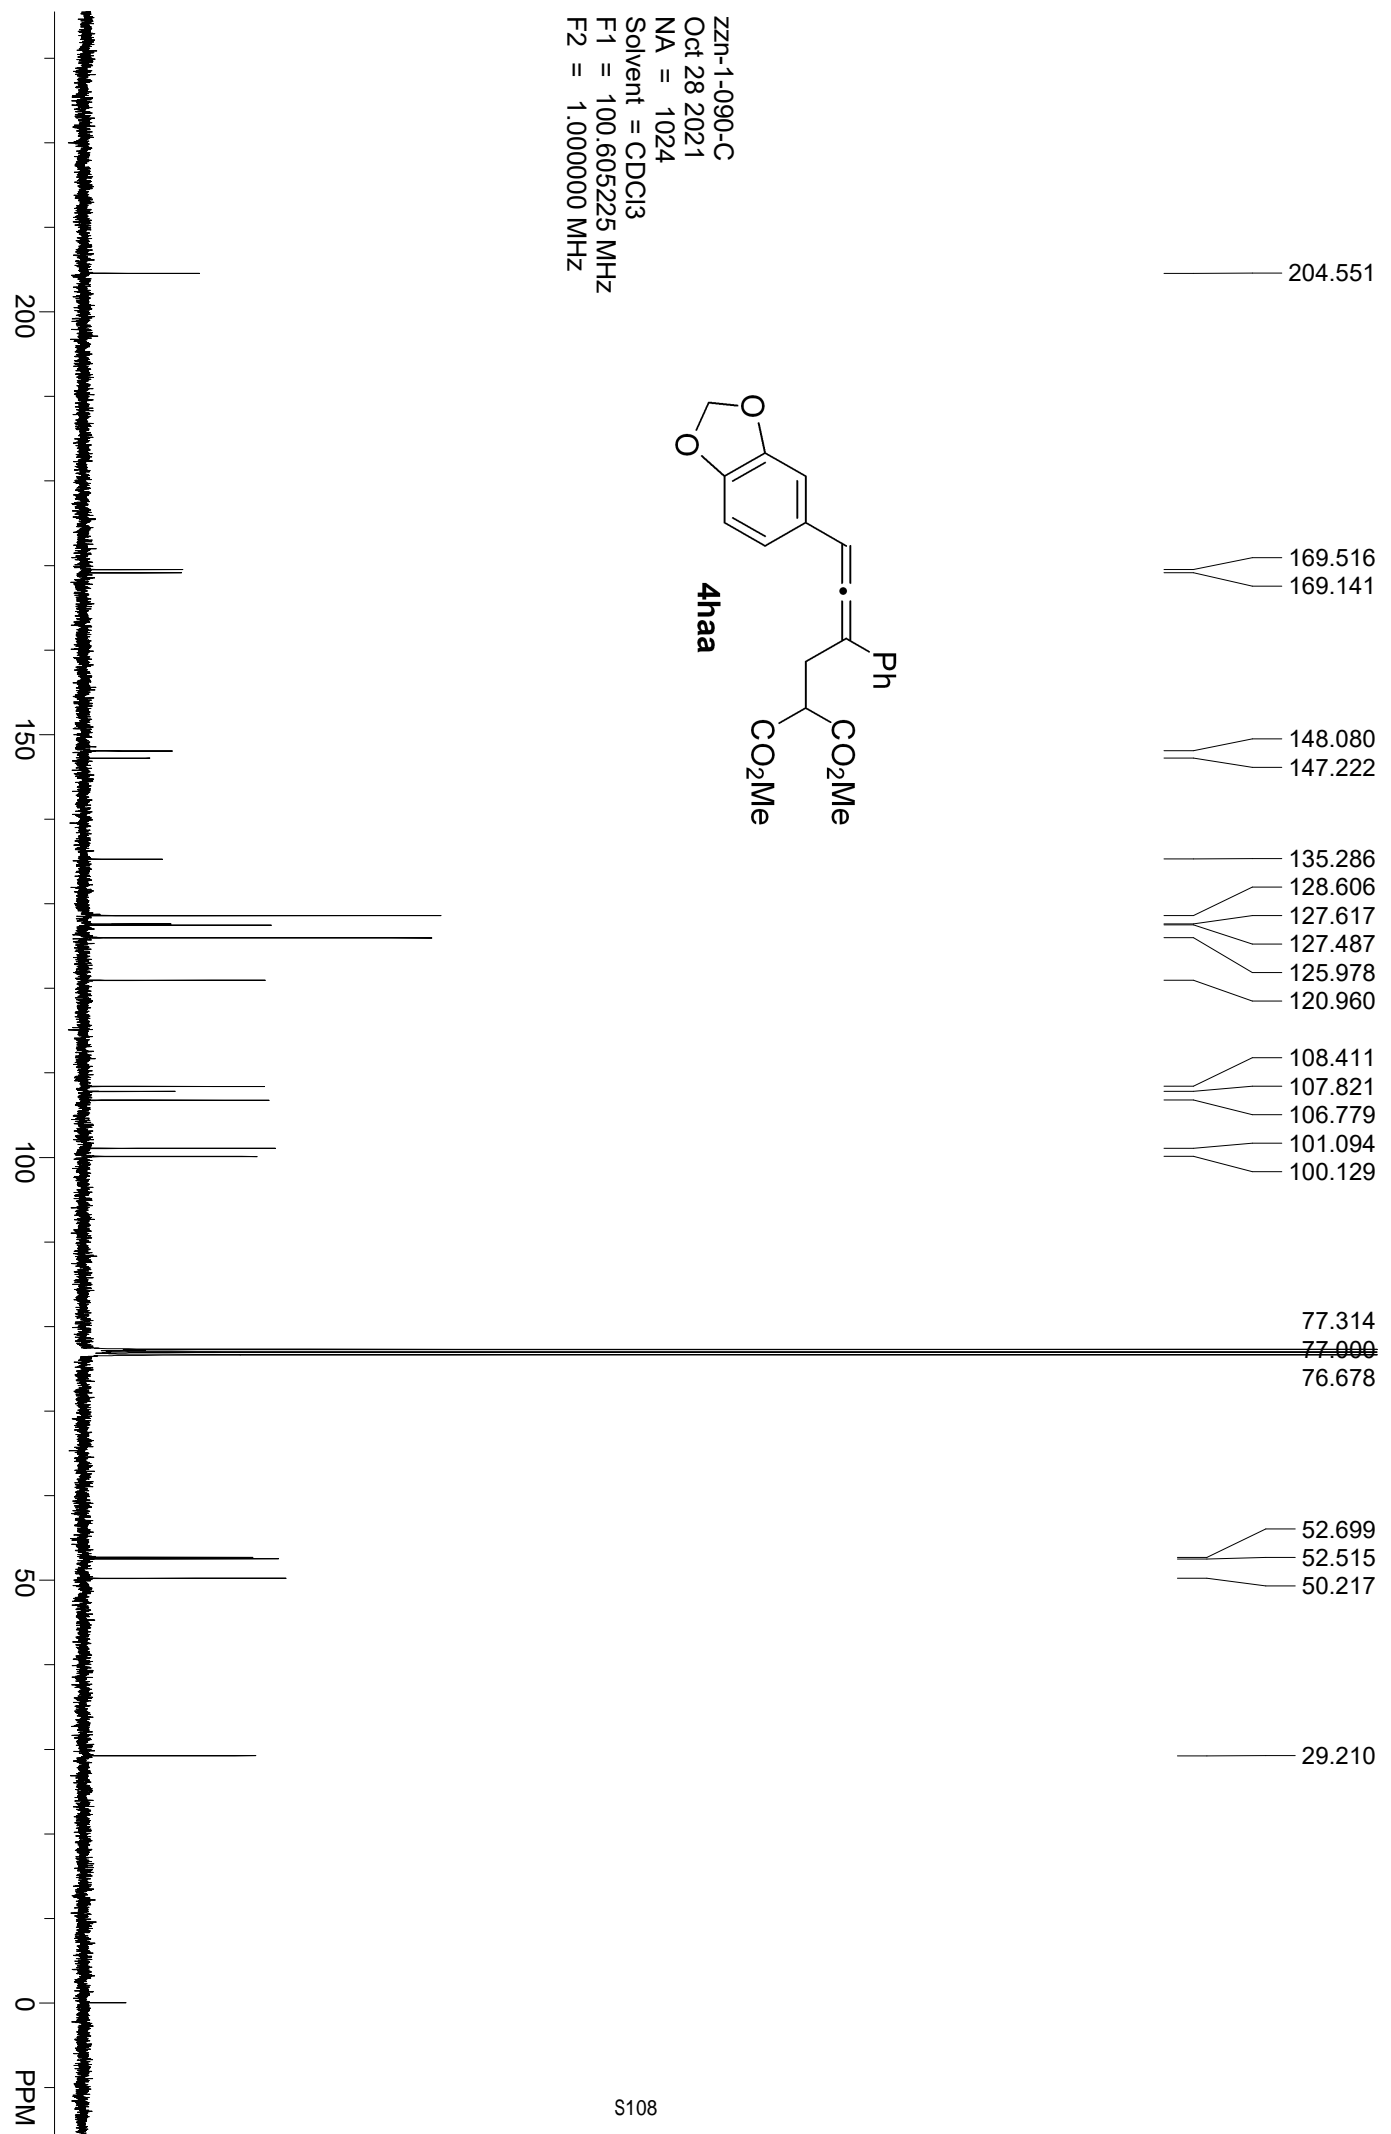

7.458  
7.439  
7.349  
7.330  
7.311  
7.295  
7.260  
7.242  
7.224  
7.200  
7.185  
7.167  
7.152  
7.071  
7.055  
7.035  
7.013  
6.829  
6.821  
6.812

3.770  
3.754  
3.749  
3.733  
3.717  
3.456  
3.309  
3.300  
3.288  
3.279  
3.269  
3.261  
3.248  
3.240  
3.176  
3.167  
3.161  
3.151  
3.137  
3.127  
3.121  
3.112

-0.000

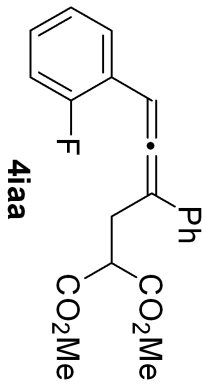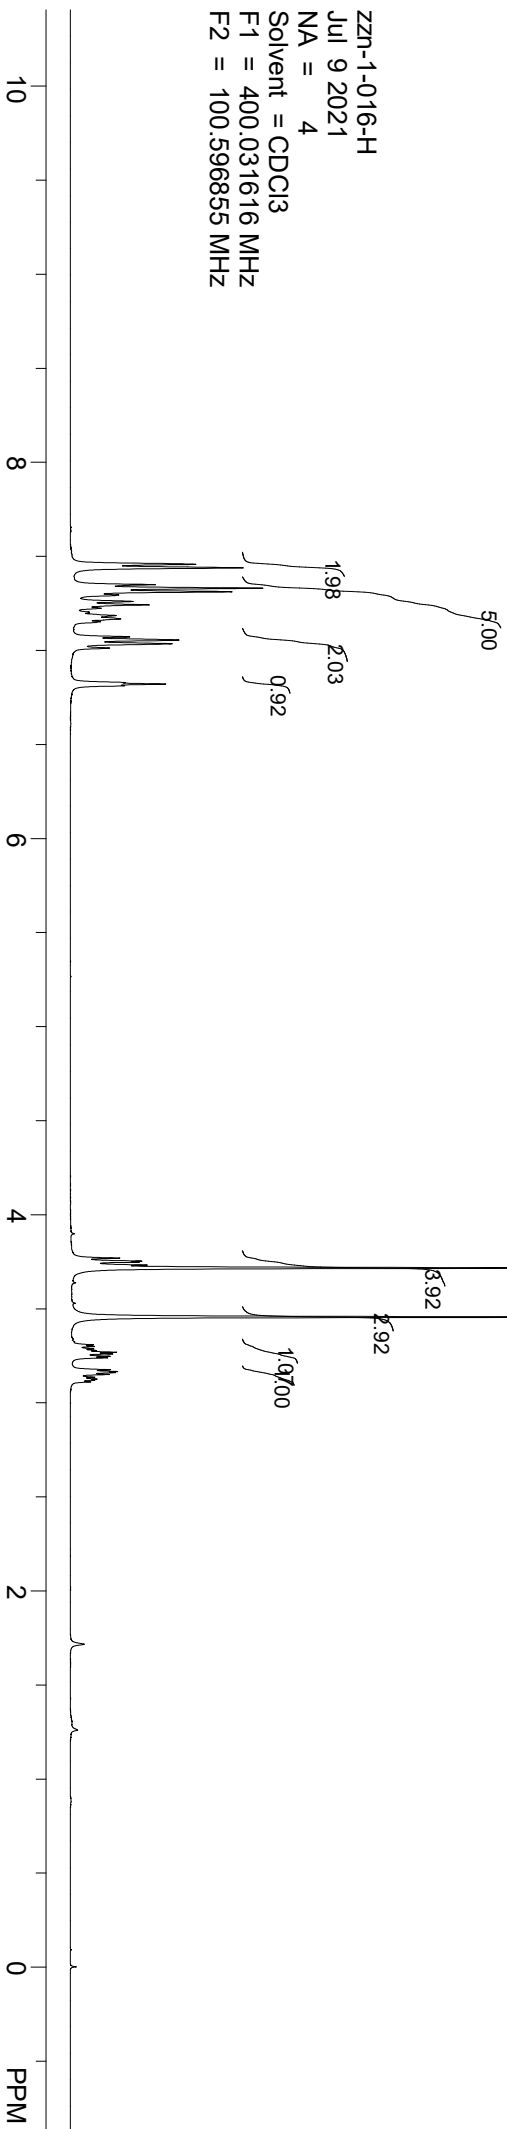

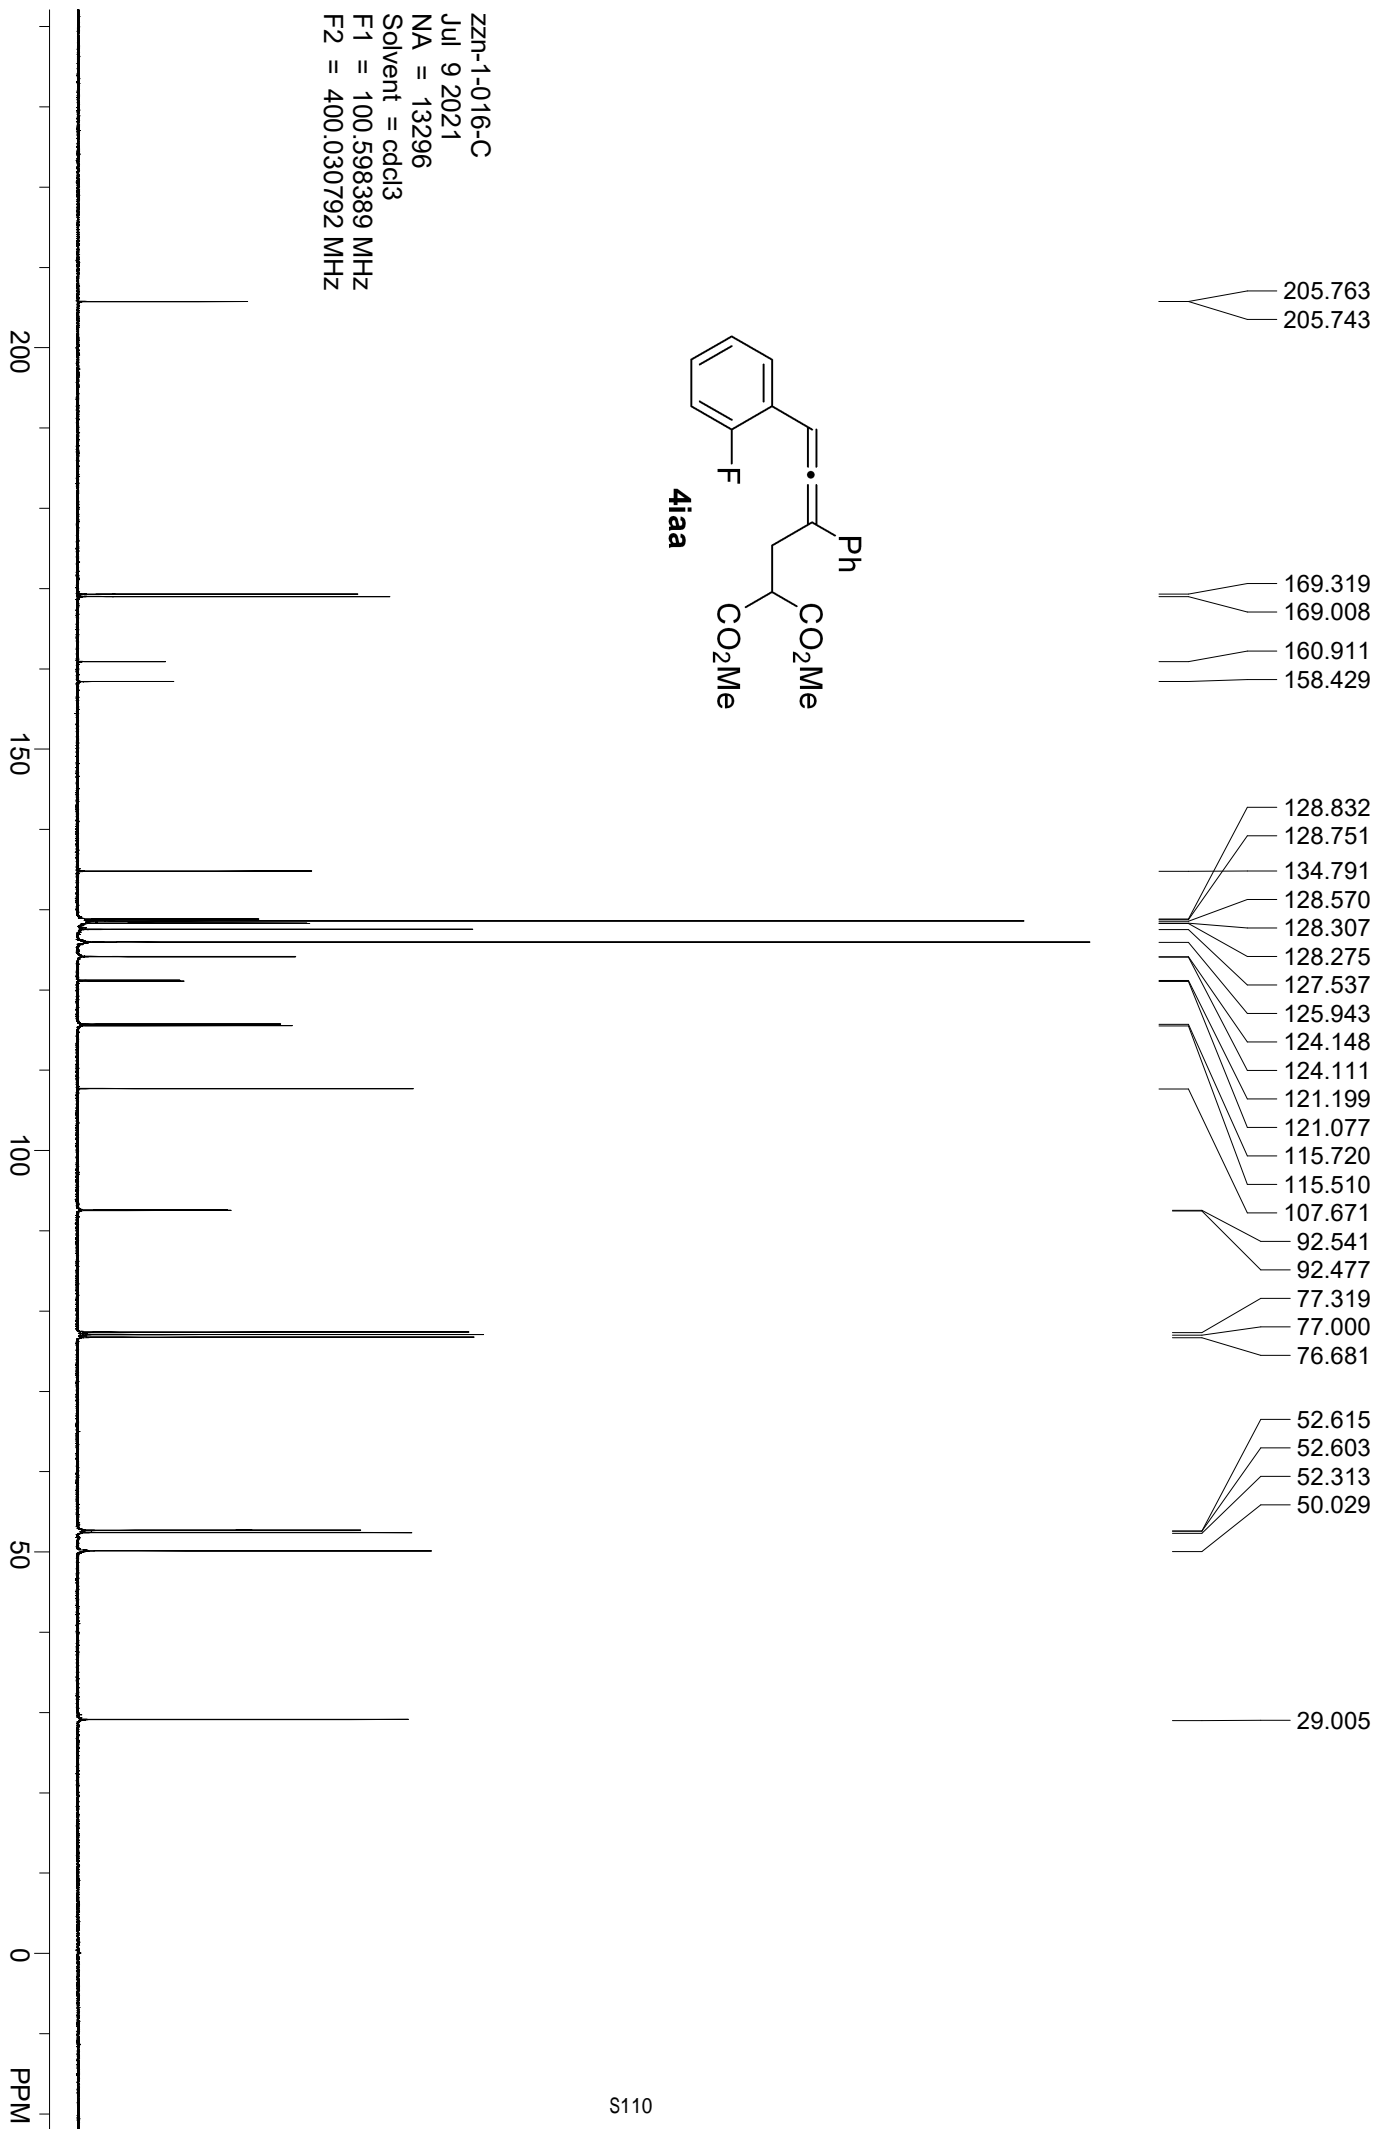

zzn-1-016-F  
Jul 10 2021  
NA = 4  
Solvent = CDCl3  
F1 = 376.075134 MHz  
F2 = 399.722015 MHz

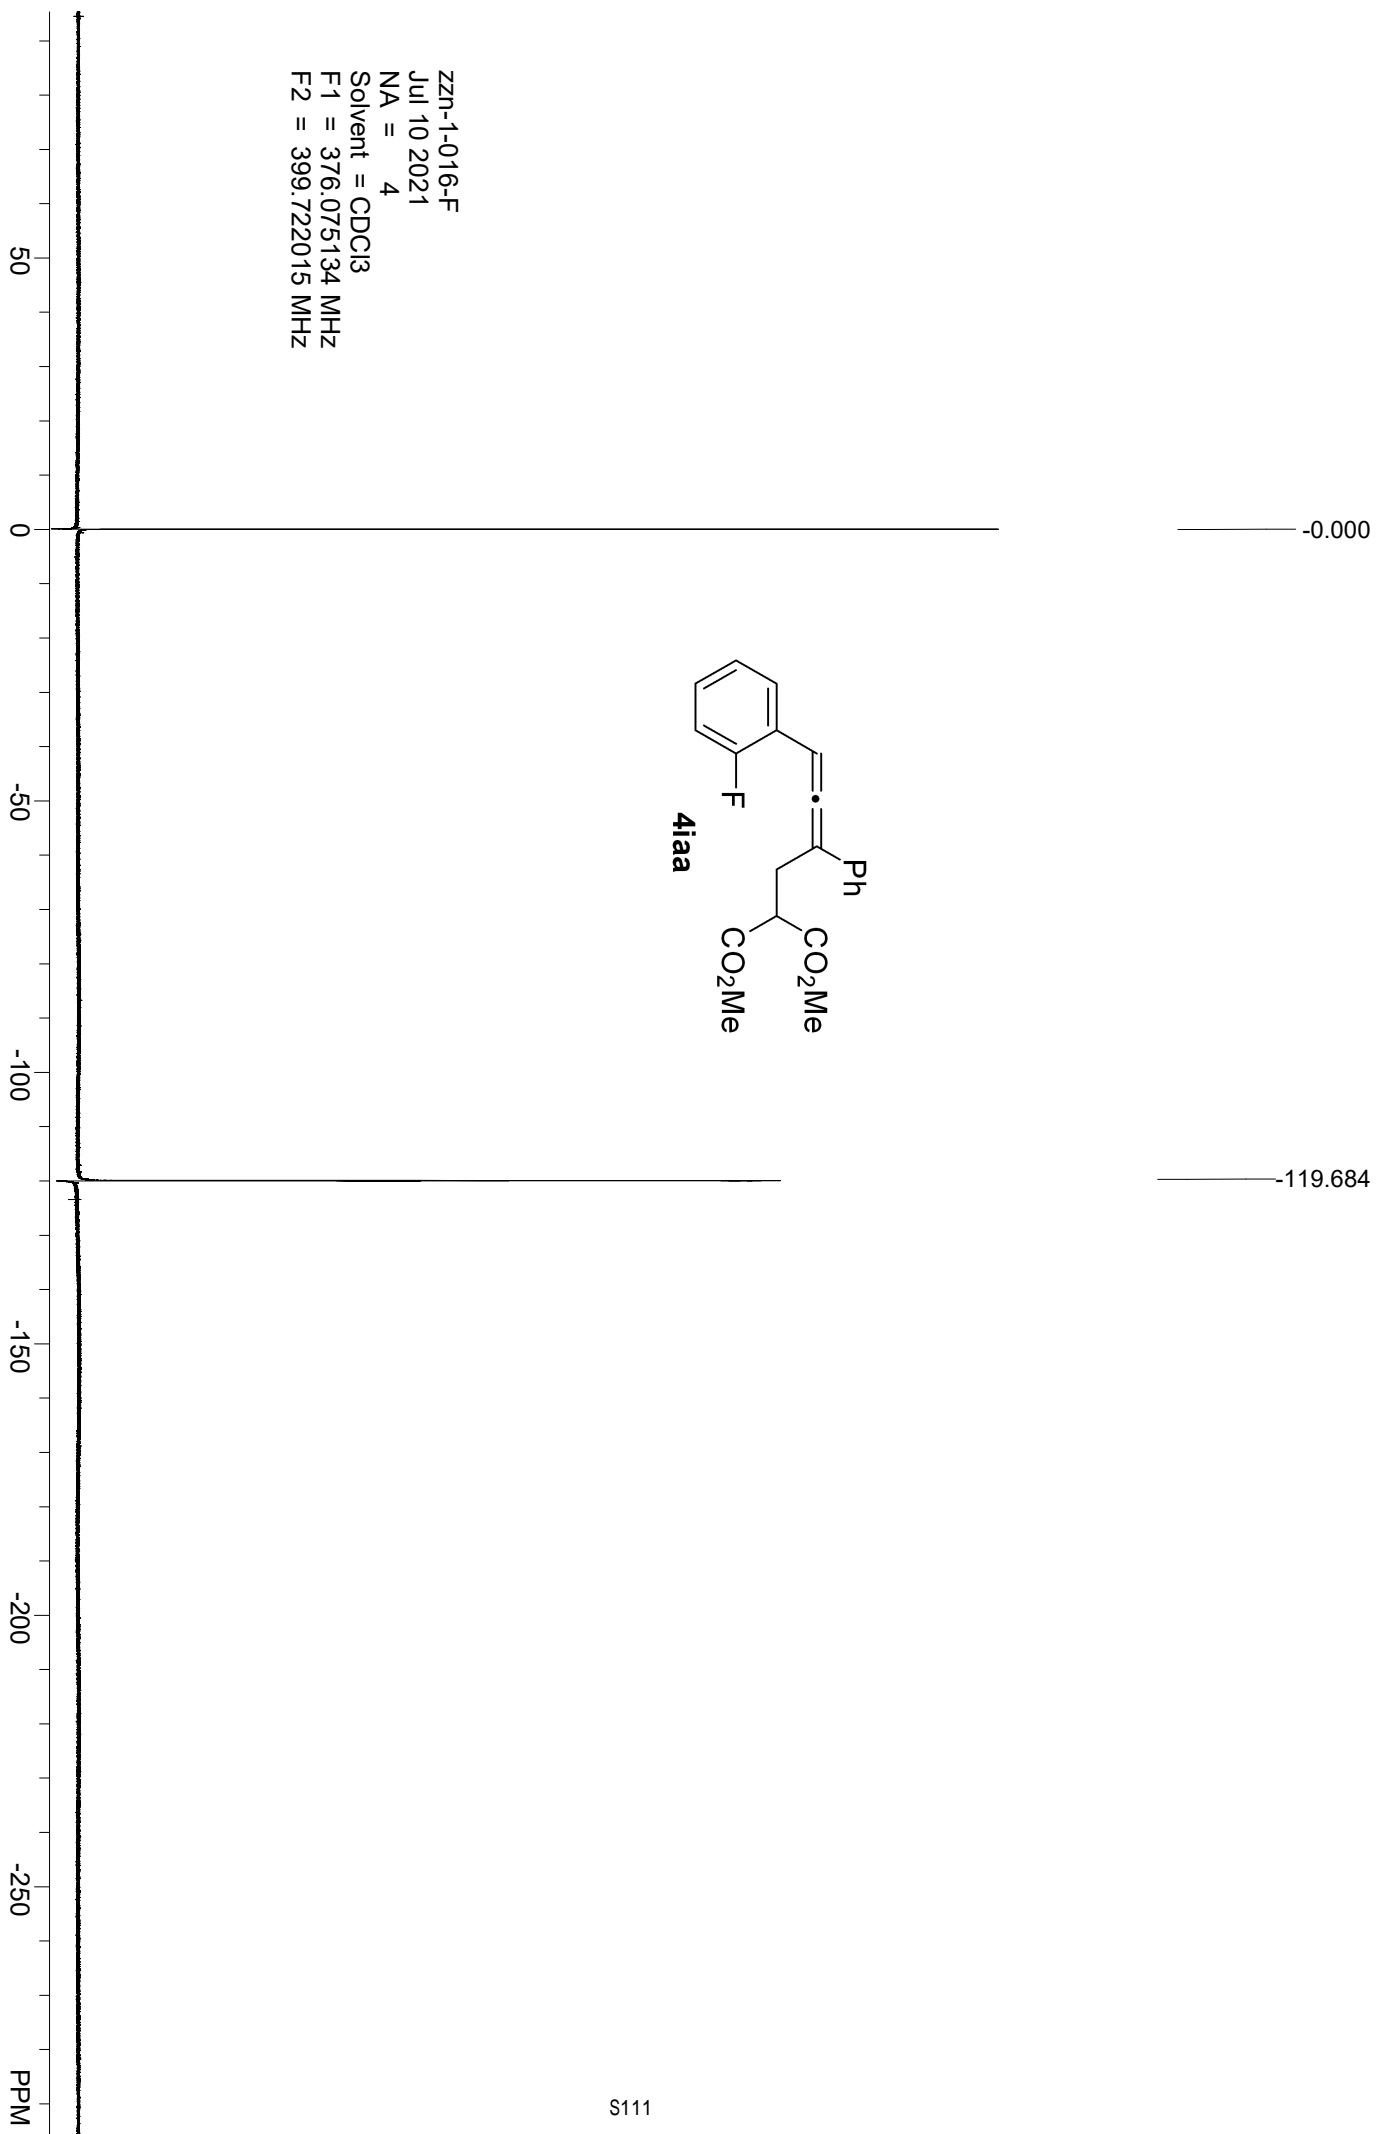

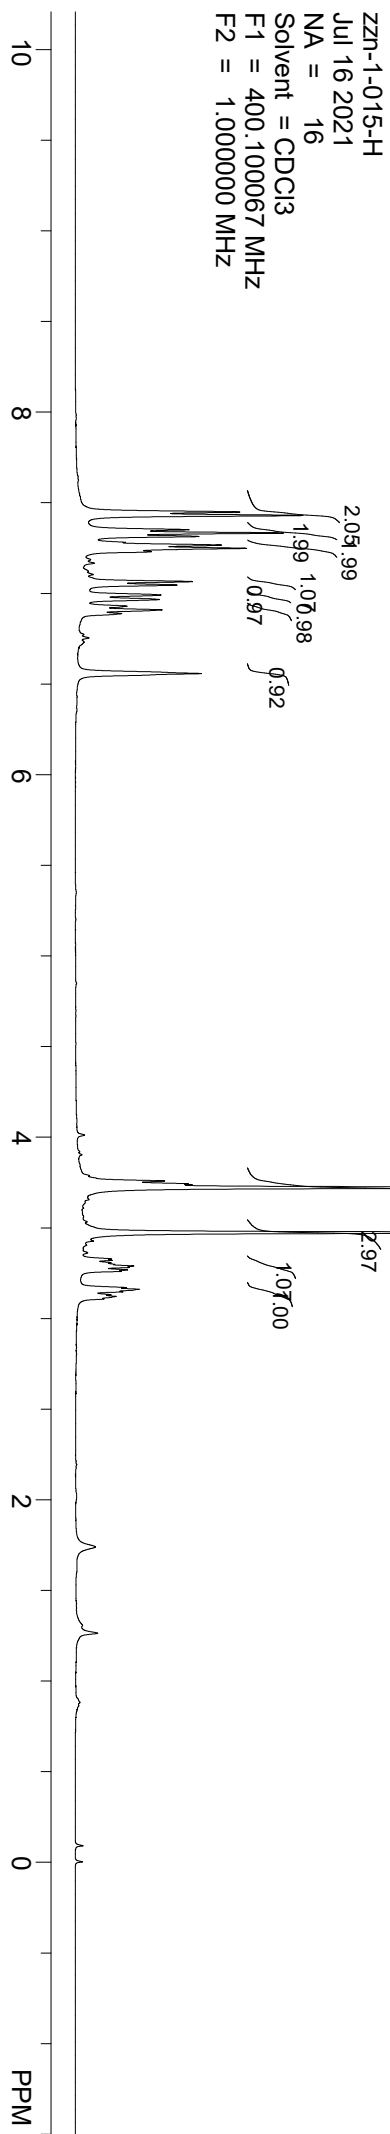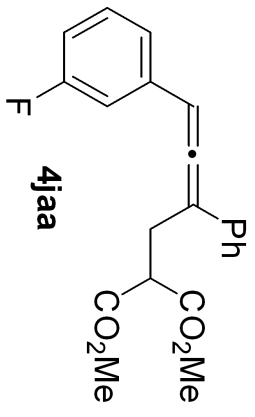

- 7.449
- 7.429
- 7.351
- 7.333
- 7.314
- 7.281
- 7.267
- 7.248
- 7.230
- 7.065
- 7.046
- 6.991
- 6.966
- 6.929
- 6.909
- 6.889
- 6.557

- 3.758
- 3.742
- 3.736
- 3.719
- 3.471
- 3.328
- 3.320
- 3.306
- 3.298
- 3.288
- 3.281
- 3.267
- 3.259
- 3.169
- 3.160
- 3.146
- 3.130
- 3.120
- 3.106

0.000



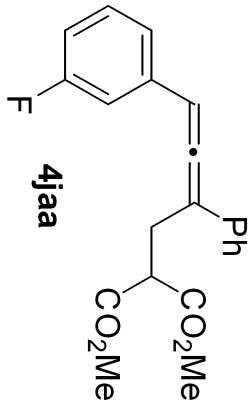

zzn-1-015-purity  
Jul 9 2021  
purity = 97%  
35.4 mg product with 3.5 uL dibromomethane  
NA = 4  
Solvent = cdcl3  
F1 = 400.031403 MHz  
F2 = 100.596855 MHz

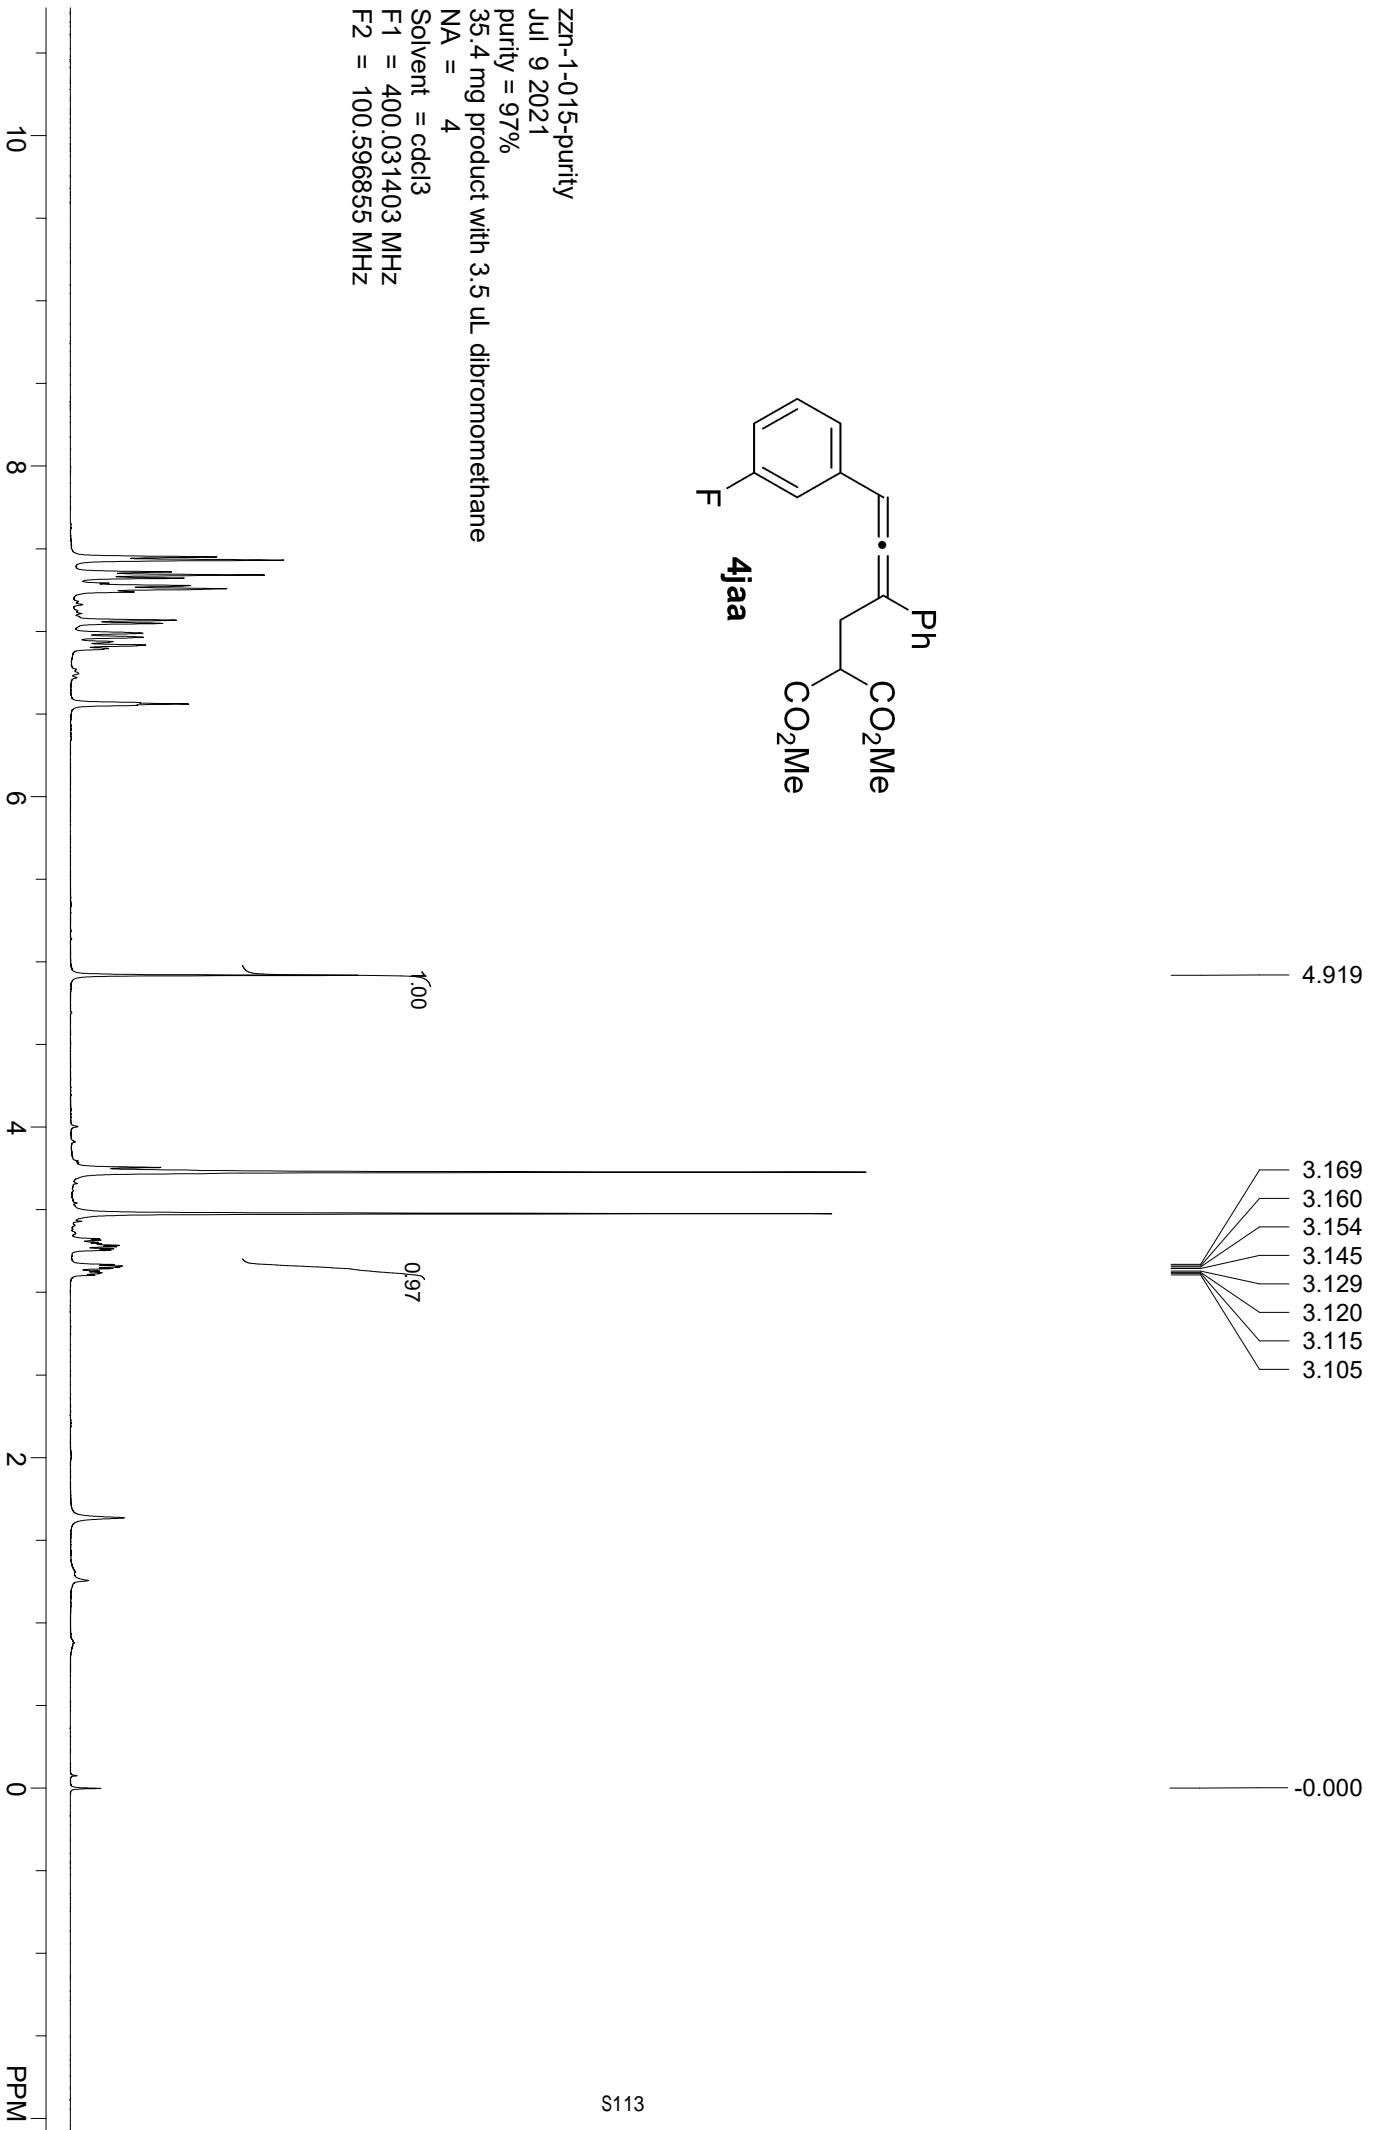

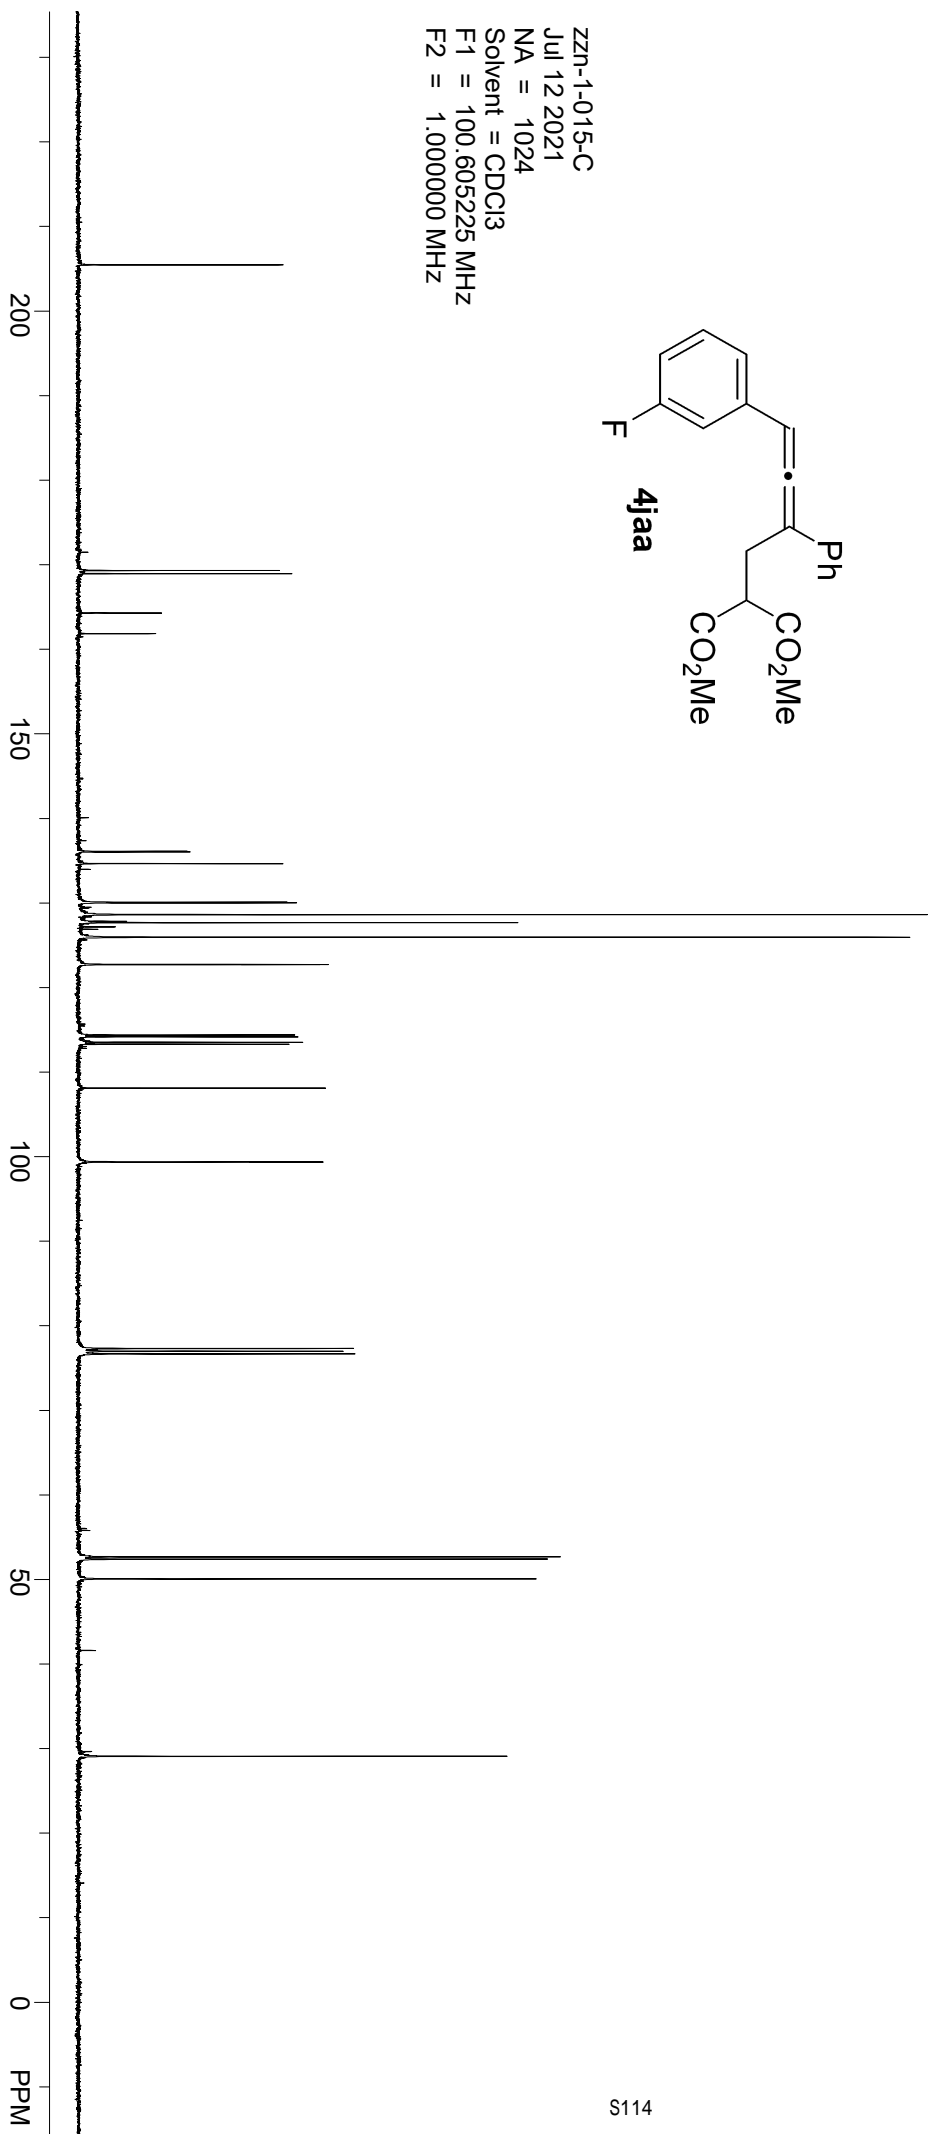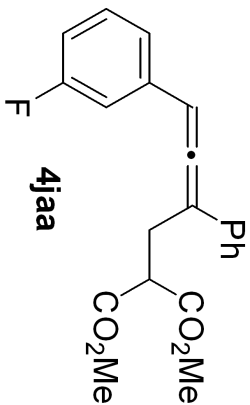

- 205.463
- 169.317
- 168.949
- 164.291
- 161.855
- 136.121
- 136.045
- 134.658
- 130.107
- 130.023
- 128.629
- 127.679
- 125.963
- 122.745
- 122.714
- 114.394
- 114.180
- 113.536
- 113.314
- 108.120
- 99.394
- 99.371
- 77.322
- 77.000
- 76.686
- 52.653
- 52.385
- 50.048
- 29.049

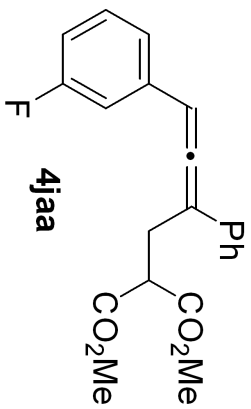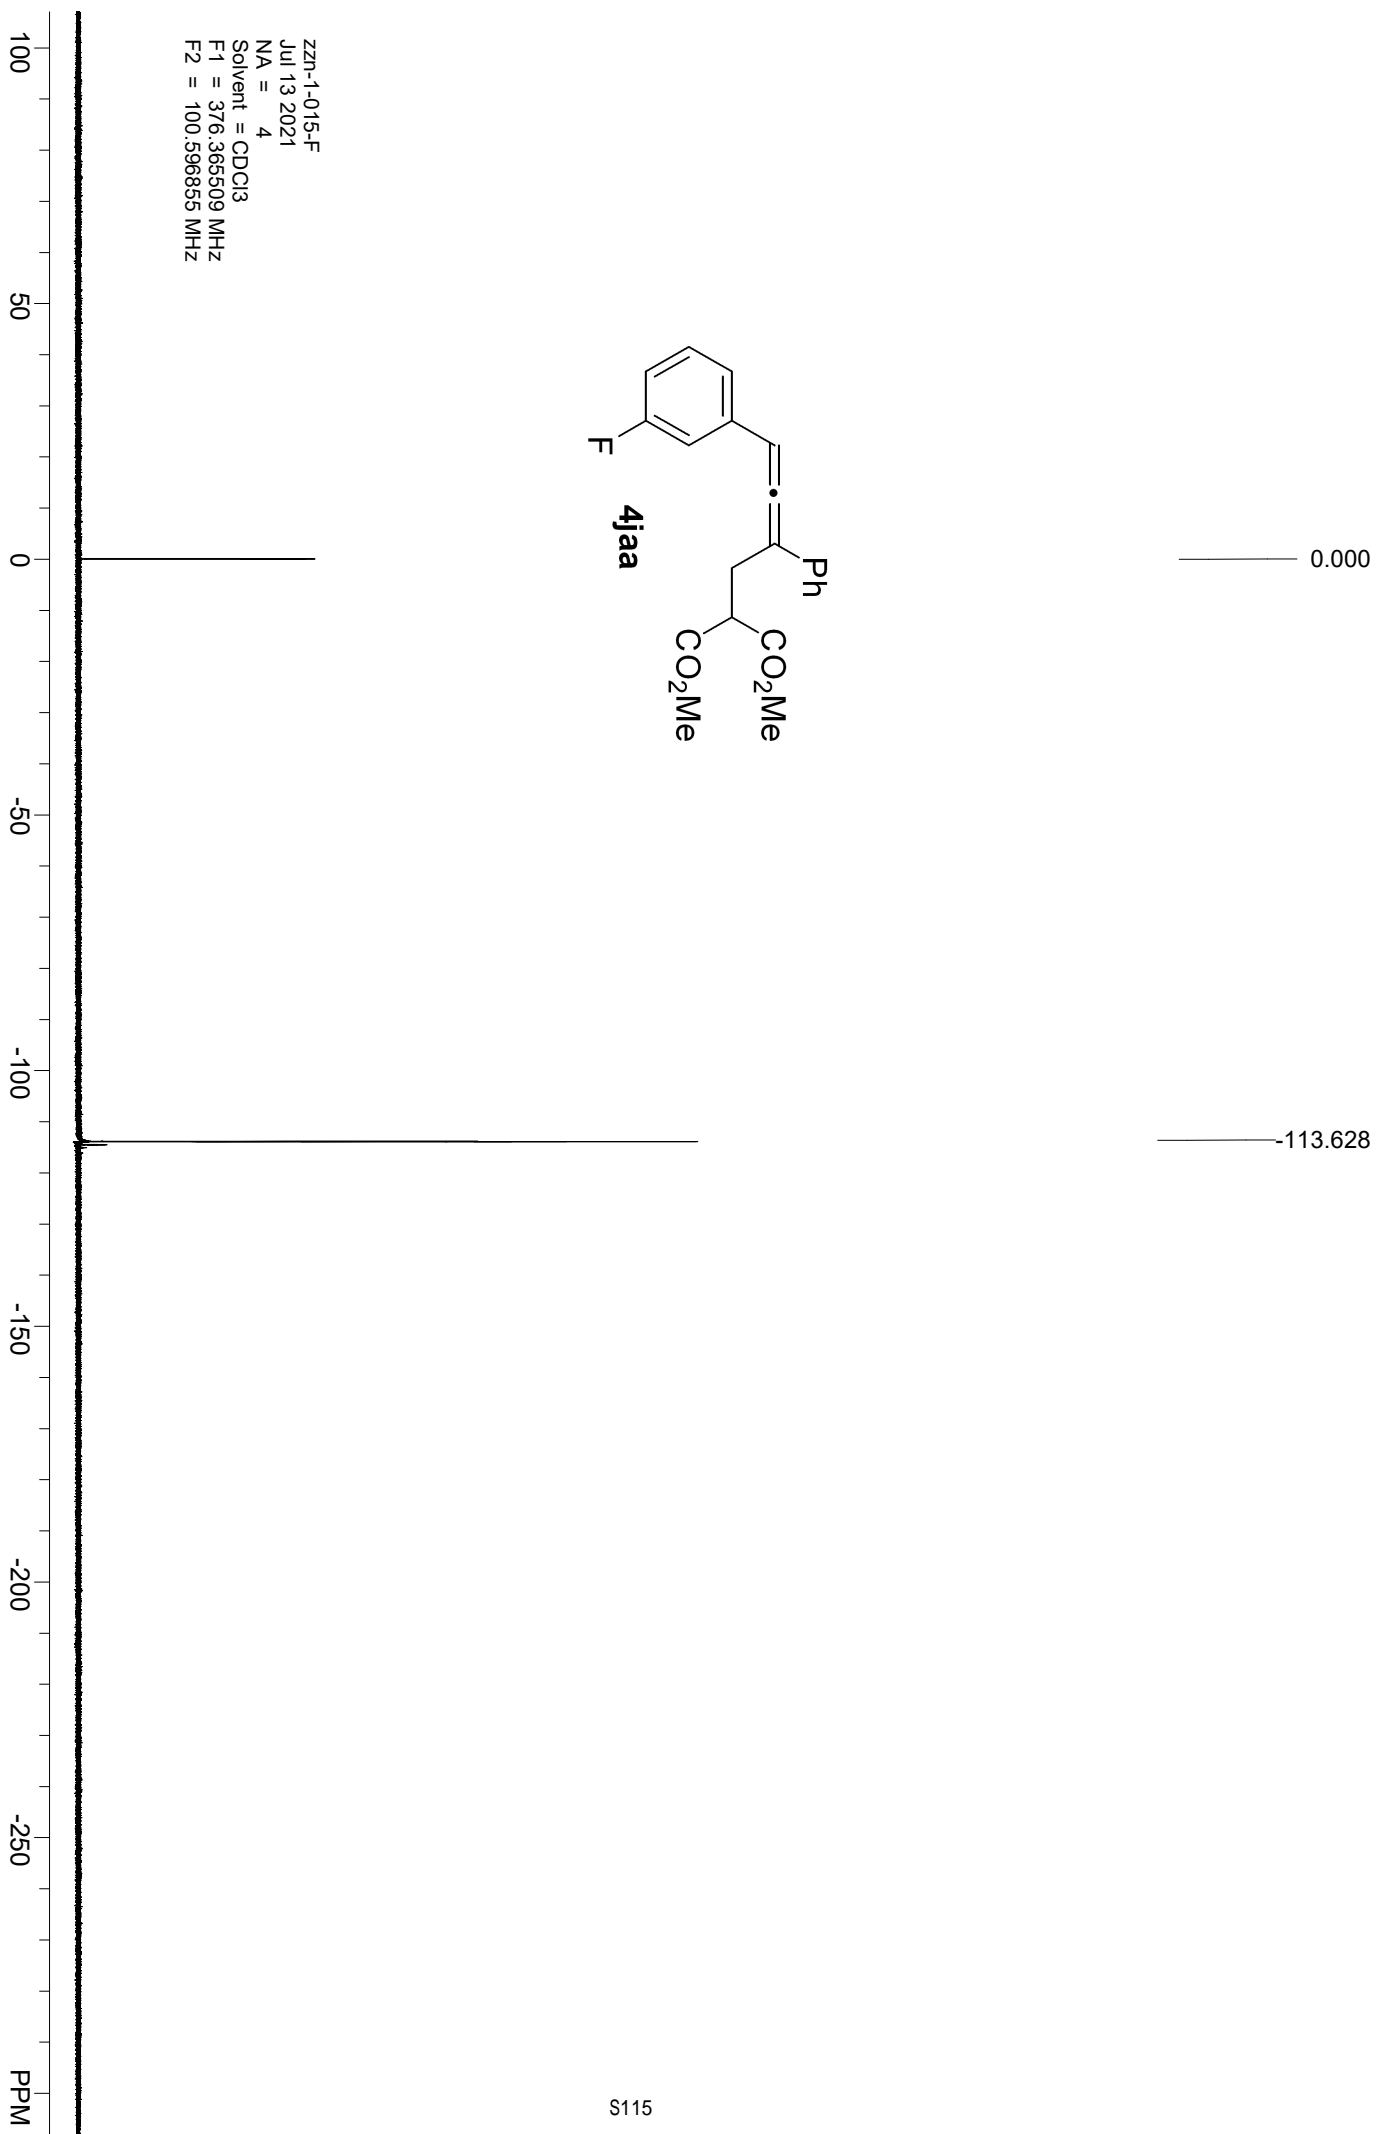

zzn-1-067-H  
Oct 7 2021  
NA = 16  
Solvent = CDCl3  
F1 = 400.031616 MHz  
F2 = 100.596855 MHz

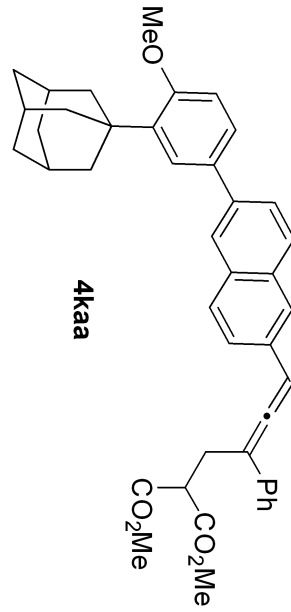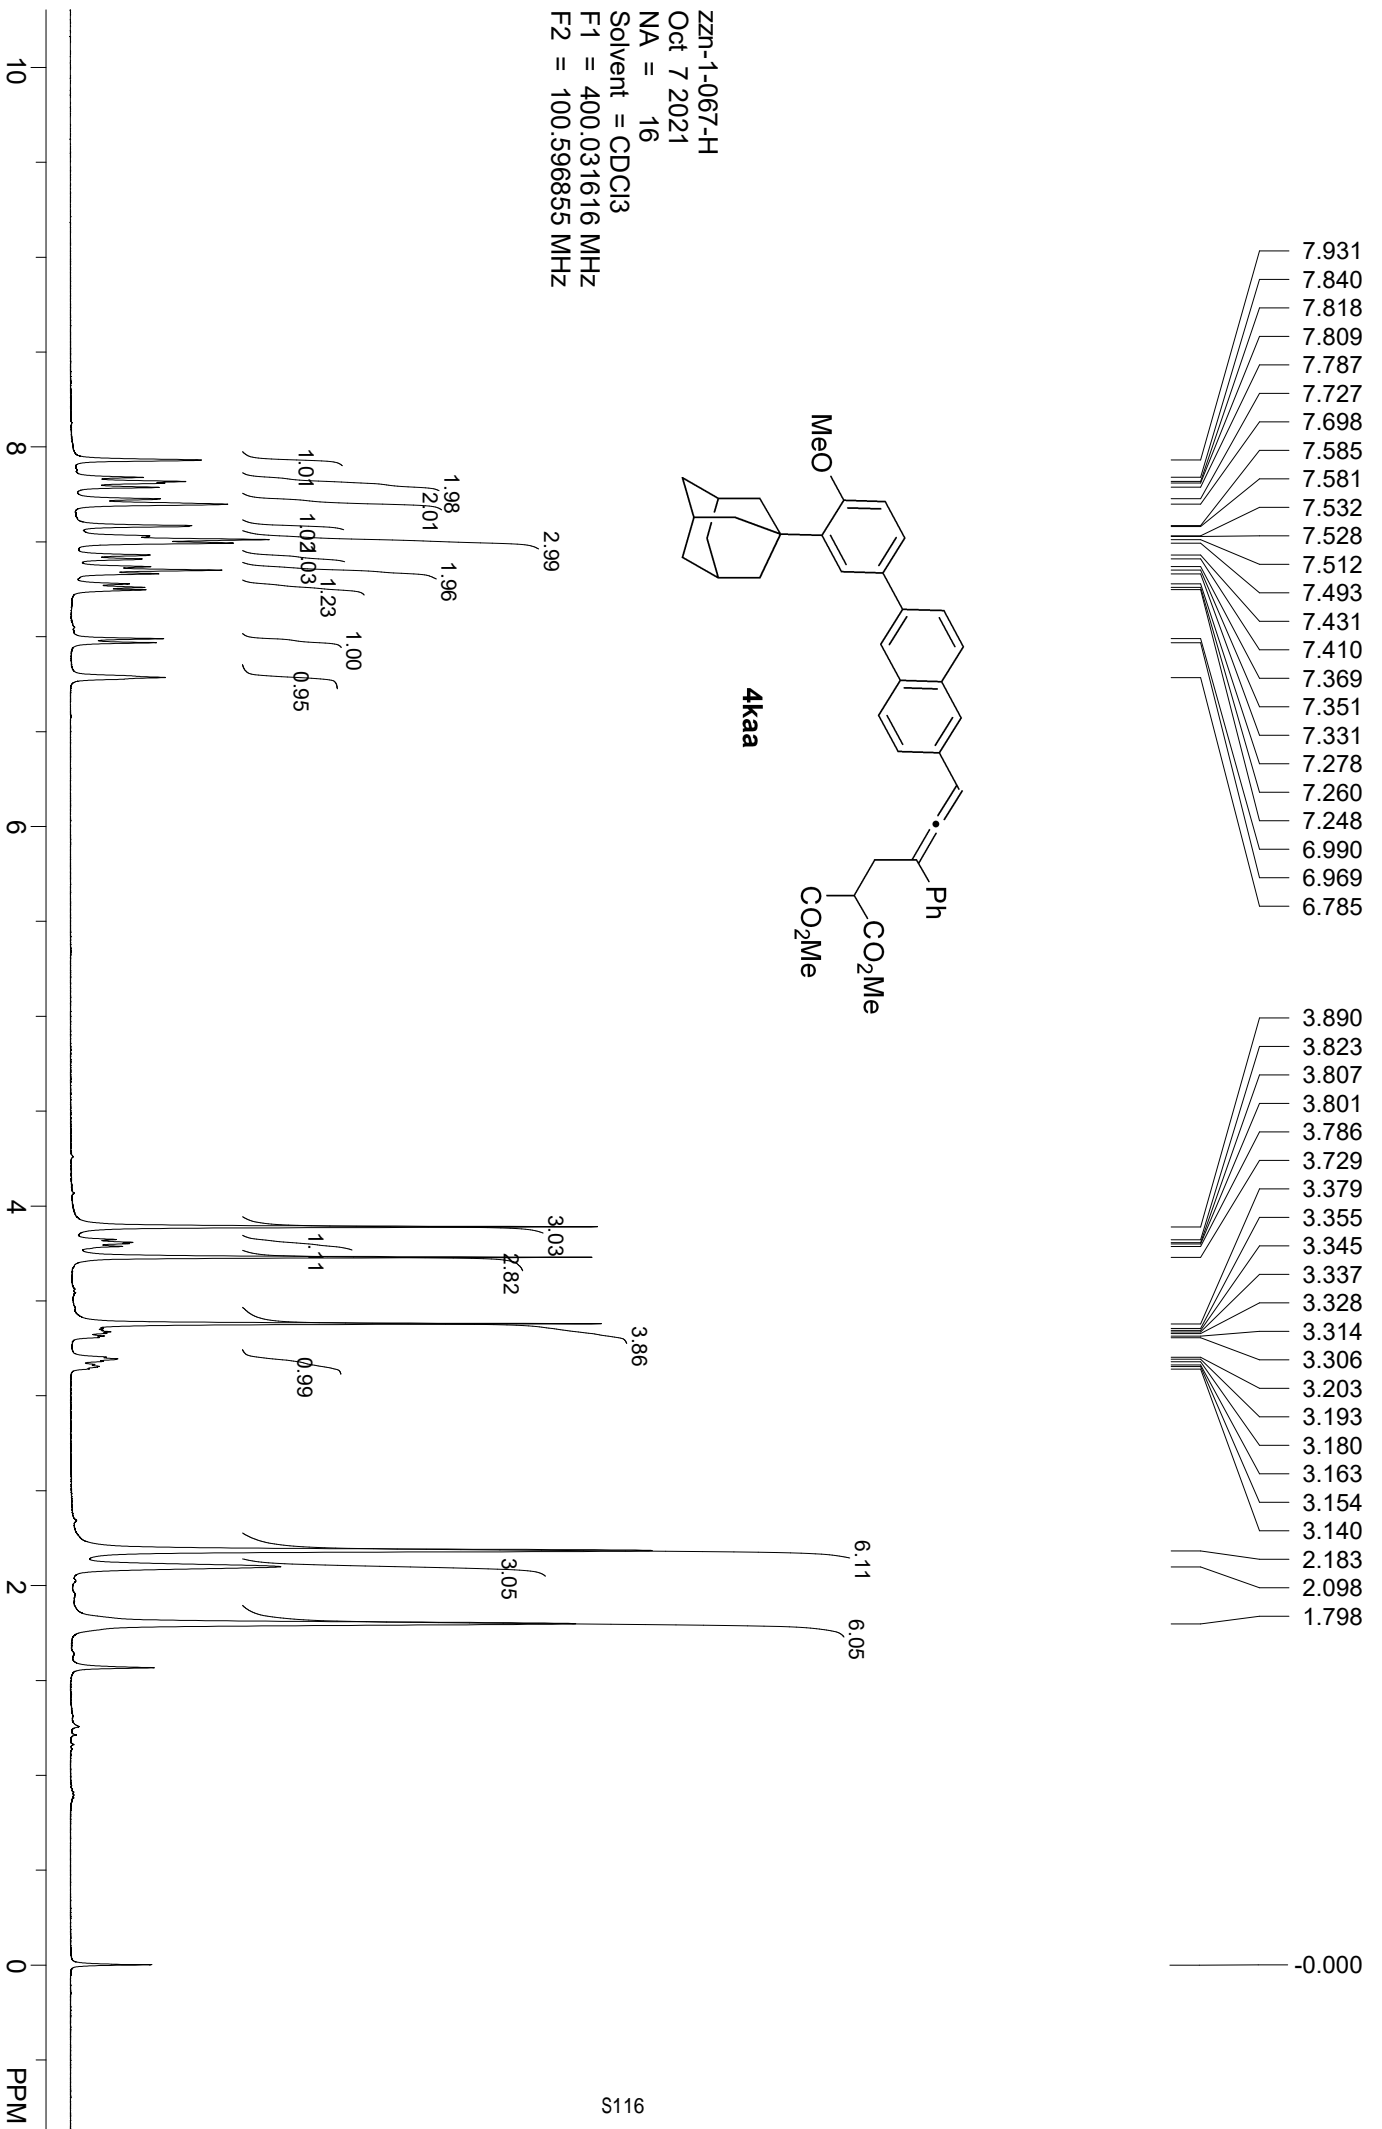

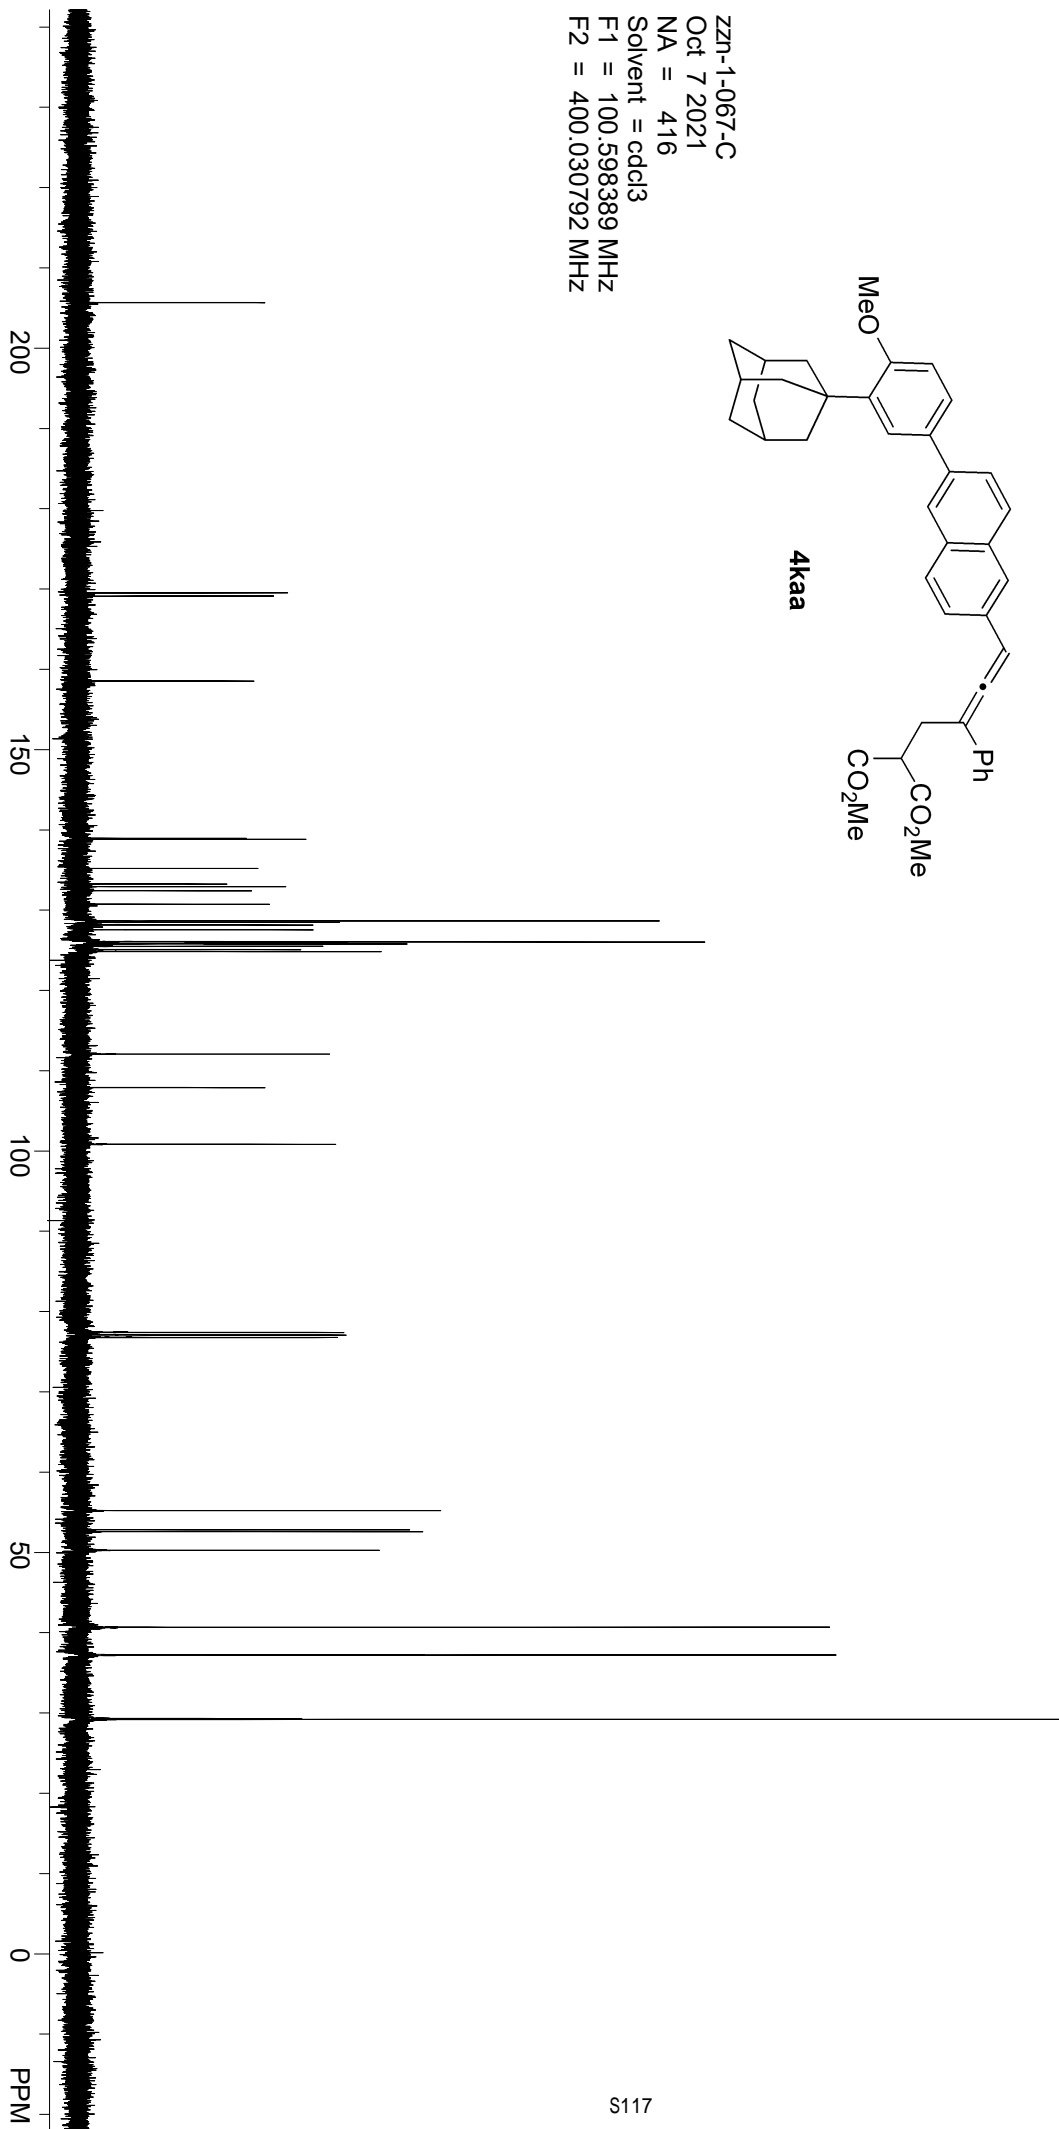

- 7.394
- 7.374
- 7.316
- 7.297
- 7.278
- 7.201
- 7.183
- 7.166
  
- 5.581
- 5.573
- 5.565
- 5.557
- 5.549
- 5.540
- 5.532
  
- 3.724
- 3.704
- 3.685
  
- 3.106
- 3.097
- 3.086
- 3.078
- 3.066
- 3.058
- 3.049
- 3.040
- 3.032
- 3.023
- 3.001
- 2.992
- 2.983
- 2.096
- 2.078
- 2.060
- 2.042
- 1.479
- 1.464
- 1.446
- 1.428
- 1.410
- 1.286
- 1.259
- 0.887
- 0.871
- 0.854
- 0.000

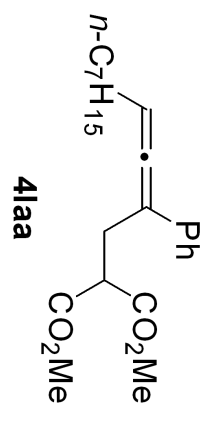

Iican-06-038-H  
 Sep 28 2021  
 NA = 4  
 Solvent = CDCl3  
 F1 = 399.717865 MHz  
 F2 = 100.517960 MHz

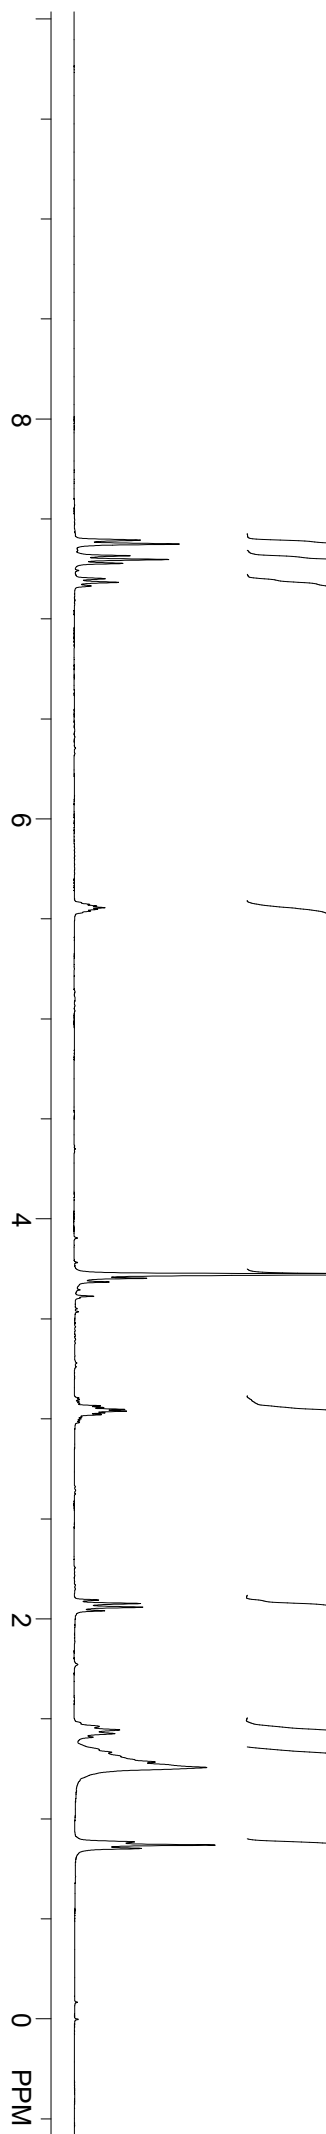

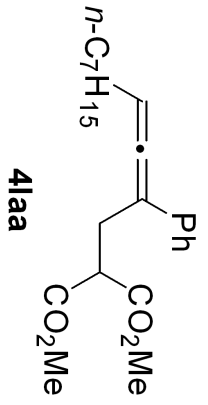

lican-06-038-purity  
Sep 29 2021  
purity = 98%  
78.1 mg product with 35  $\mu$ L dibromomethane  
NA = 4  
Solvent = cdcl3  
F1 = 400.031403 MHz  
F2 = 100.596855 MHz

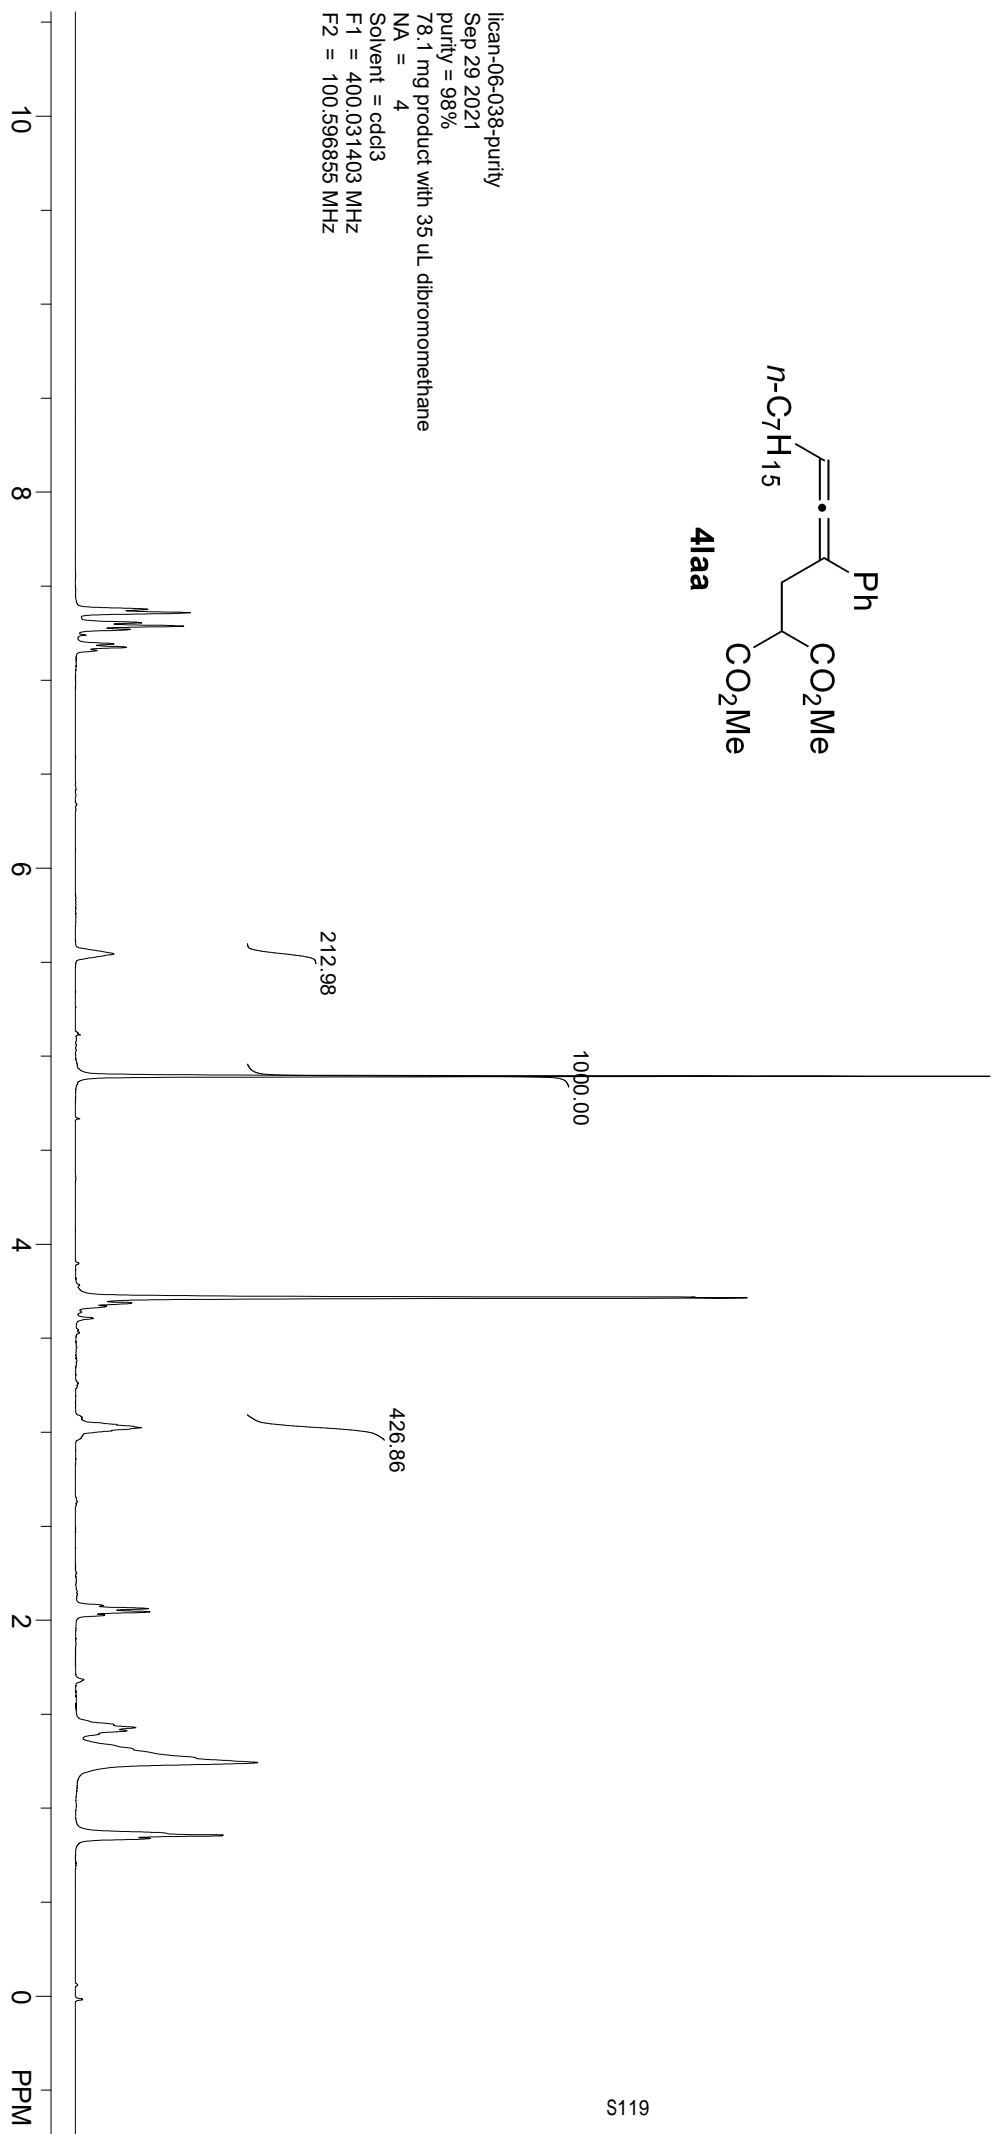

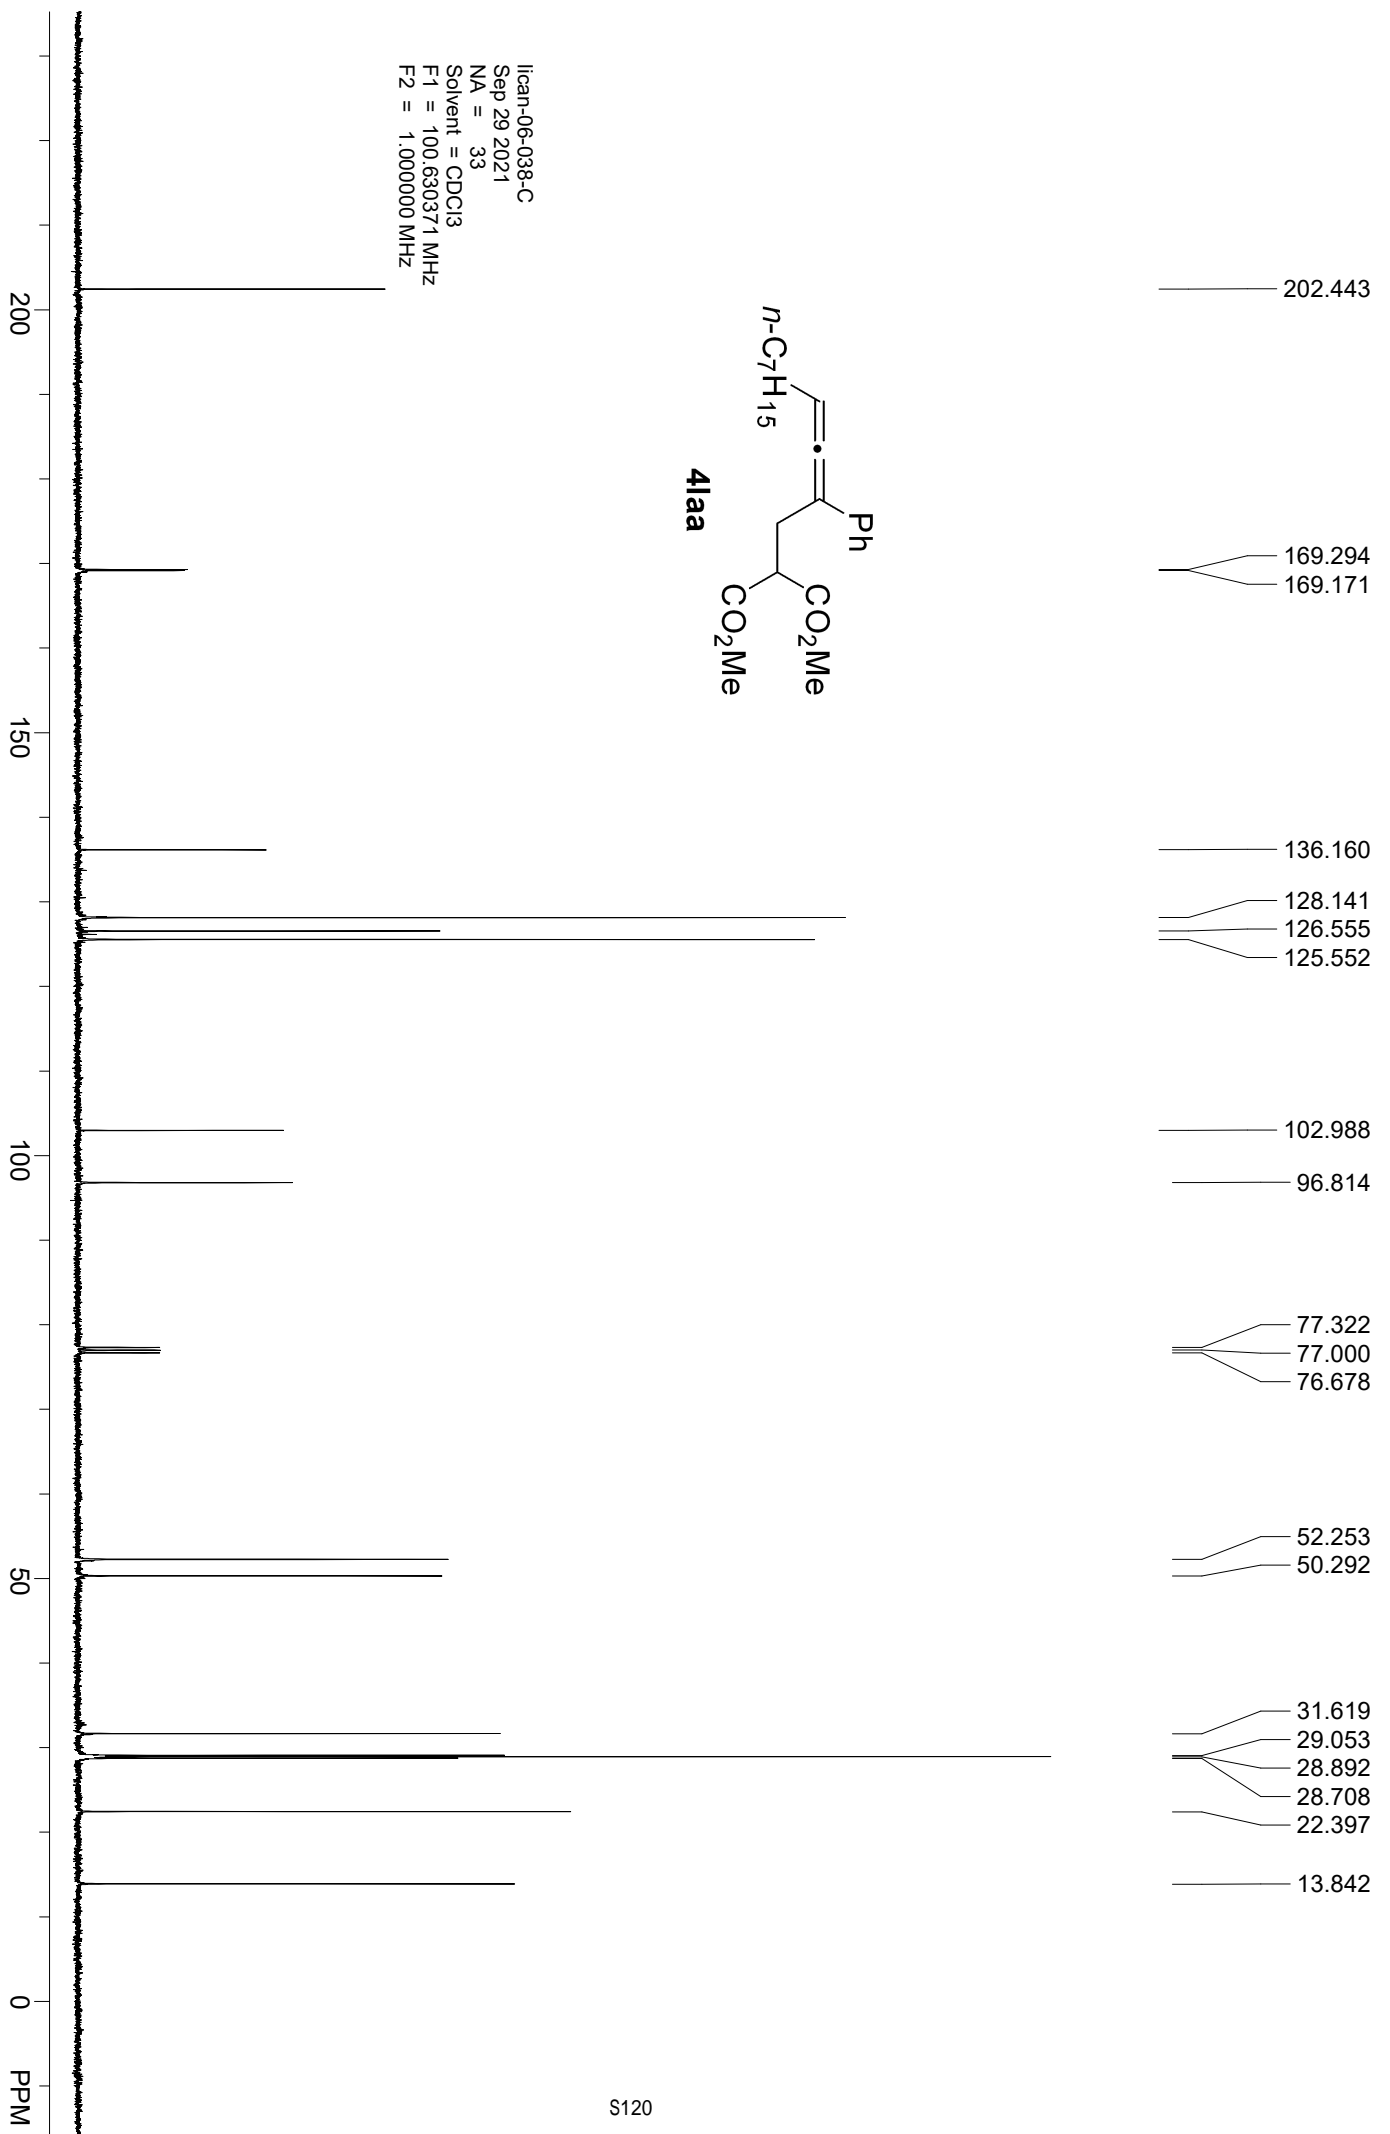



- 7.410
- 7.392
- 7.328
- 7.309
- 7.290
- 7.213
- 7.195
- 7.177
- 5.547
- 3.743
- 3.737
- 3.710
- 3.706
- 3.692
- 3.688
- 3.061
- 3.056
- 3.052
- 3.046
- 3.043
- 3.038
- 2.073
- 1.810
- 1.743
- 1.720
- 1.665
- 1.635
- 1.329
- 1.303
- 1.271
- 1.241
- 1.189
- 1.155
- 1.124
- 1.095
- 0.000

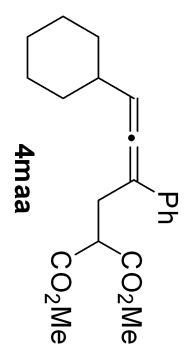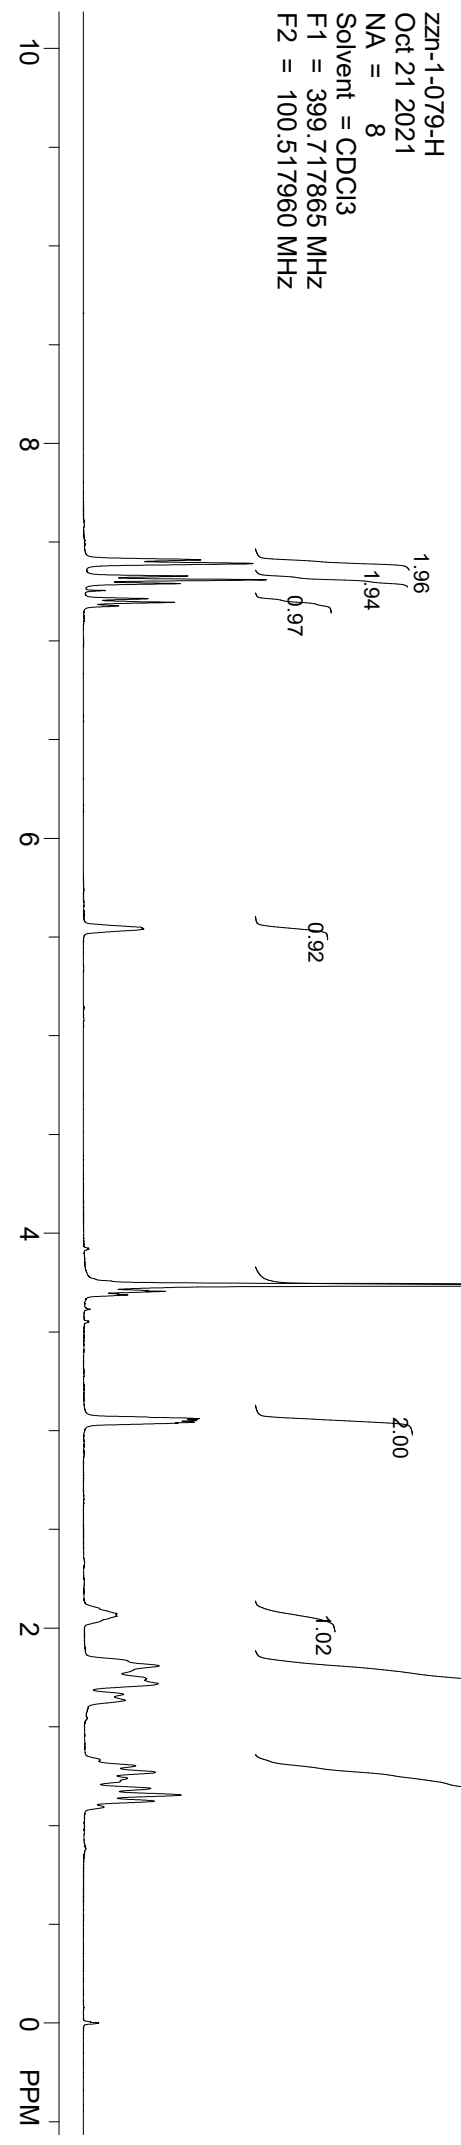

zn-1-079-C  
Oct 22 2021  
NA = 132  
Solvent = cdcl3  
F1 = 100.598389 MHz  
F2 = 400.030792 MHz

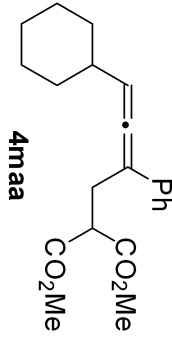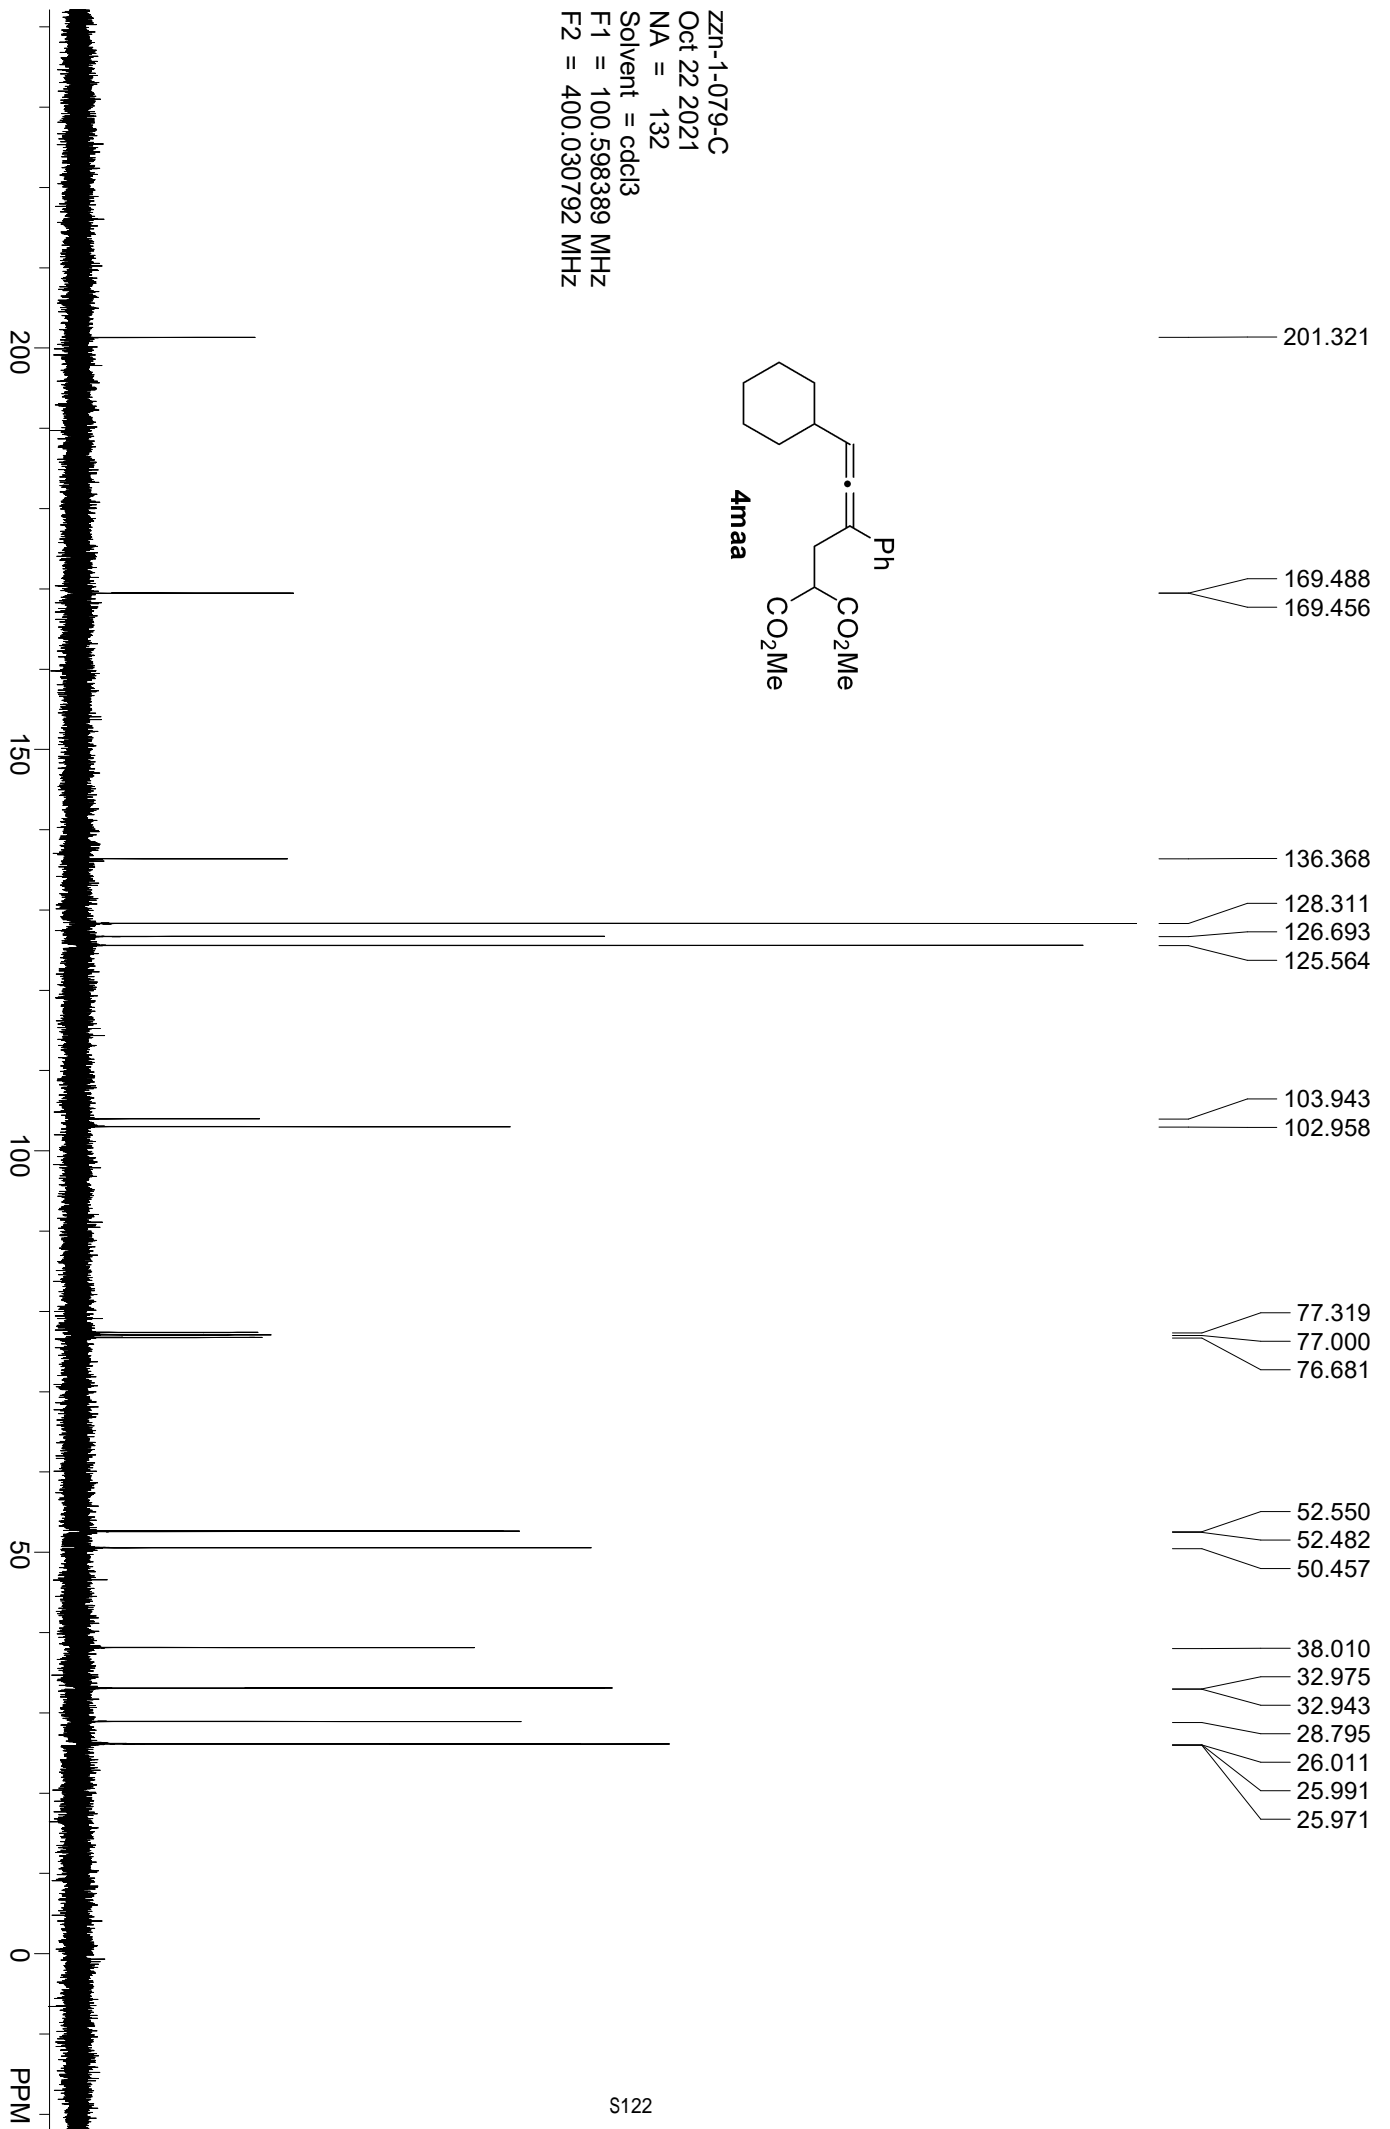

7.390  
7.371  
7.321  
7.303  
7.283  
7.205  
7.187  
7.169

5.571  
5.563  
5.555  
5.547  
5.539

3.727  
3.698  
3.679

3.094  
3.063  
3.054  
3.044  
3.037  
3.028  
3.019  
2.981

2.172  
2.153  
2.134  
2.116  
2.097  
2.079  
2.060

2.042  
1.464  
1.449  
1.432  
1.347  
1.333  
1.316  
1.120  
1.102  
1.084  
0.000

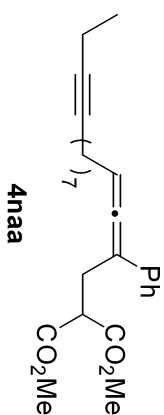

2.03  
1.98  
1.00

0.95

7.00

1.96

6.05

6.28

4.04

2.88

lican-06-056-H  
Oct 14 2021  
NA = 4  
Solvent = CDCl<sub>3</sub>  
F1 = 400.031616 MHz  
F2 = 100.596855 MHz

10  
8  
6  
4  
2  
0 PPM

lican-06-056-purity  
Oct 15 2021  
purity = 96%

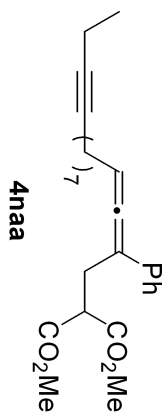

41.8 mg product with 35 uL dibromomethane  
NA = 4  
Solvent = cdcl3  
F1 = 400.031403 MHz  
F2 = 100.596855 MHz

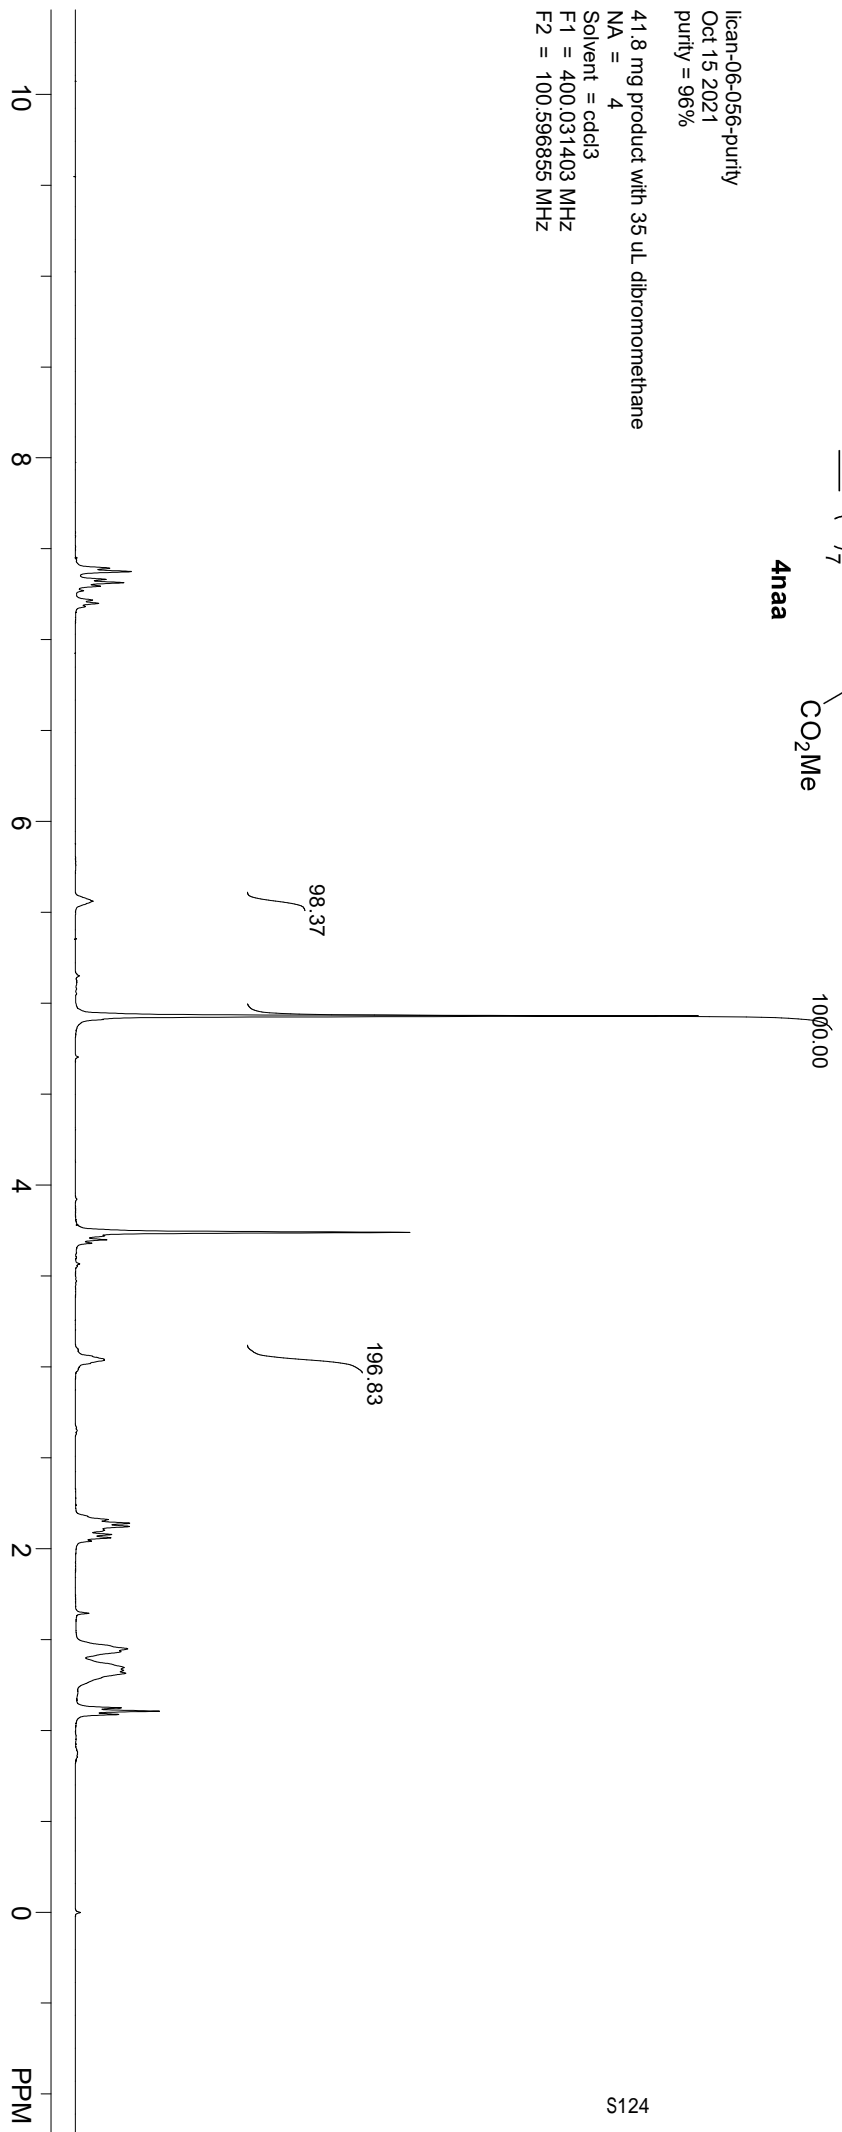

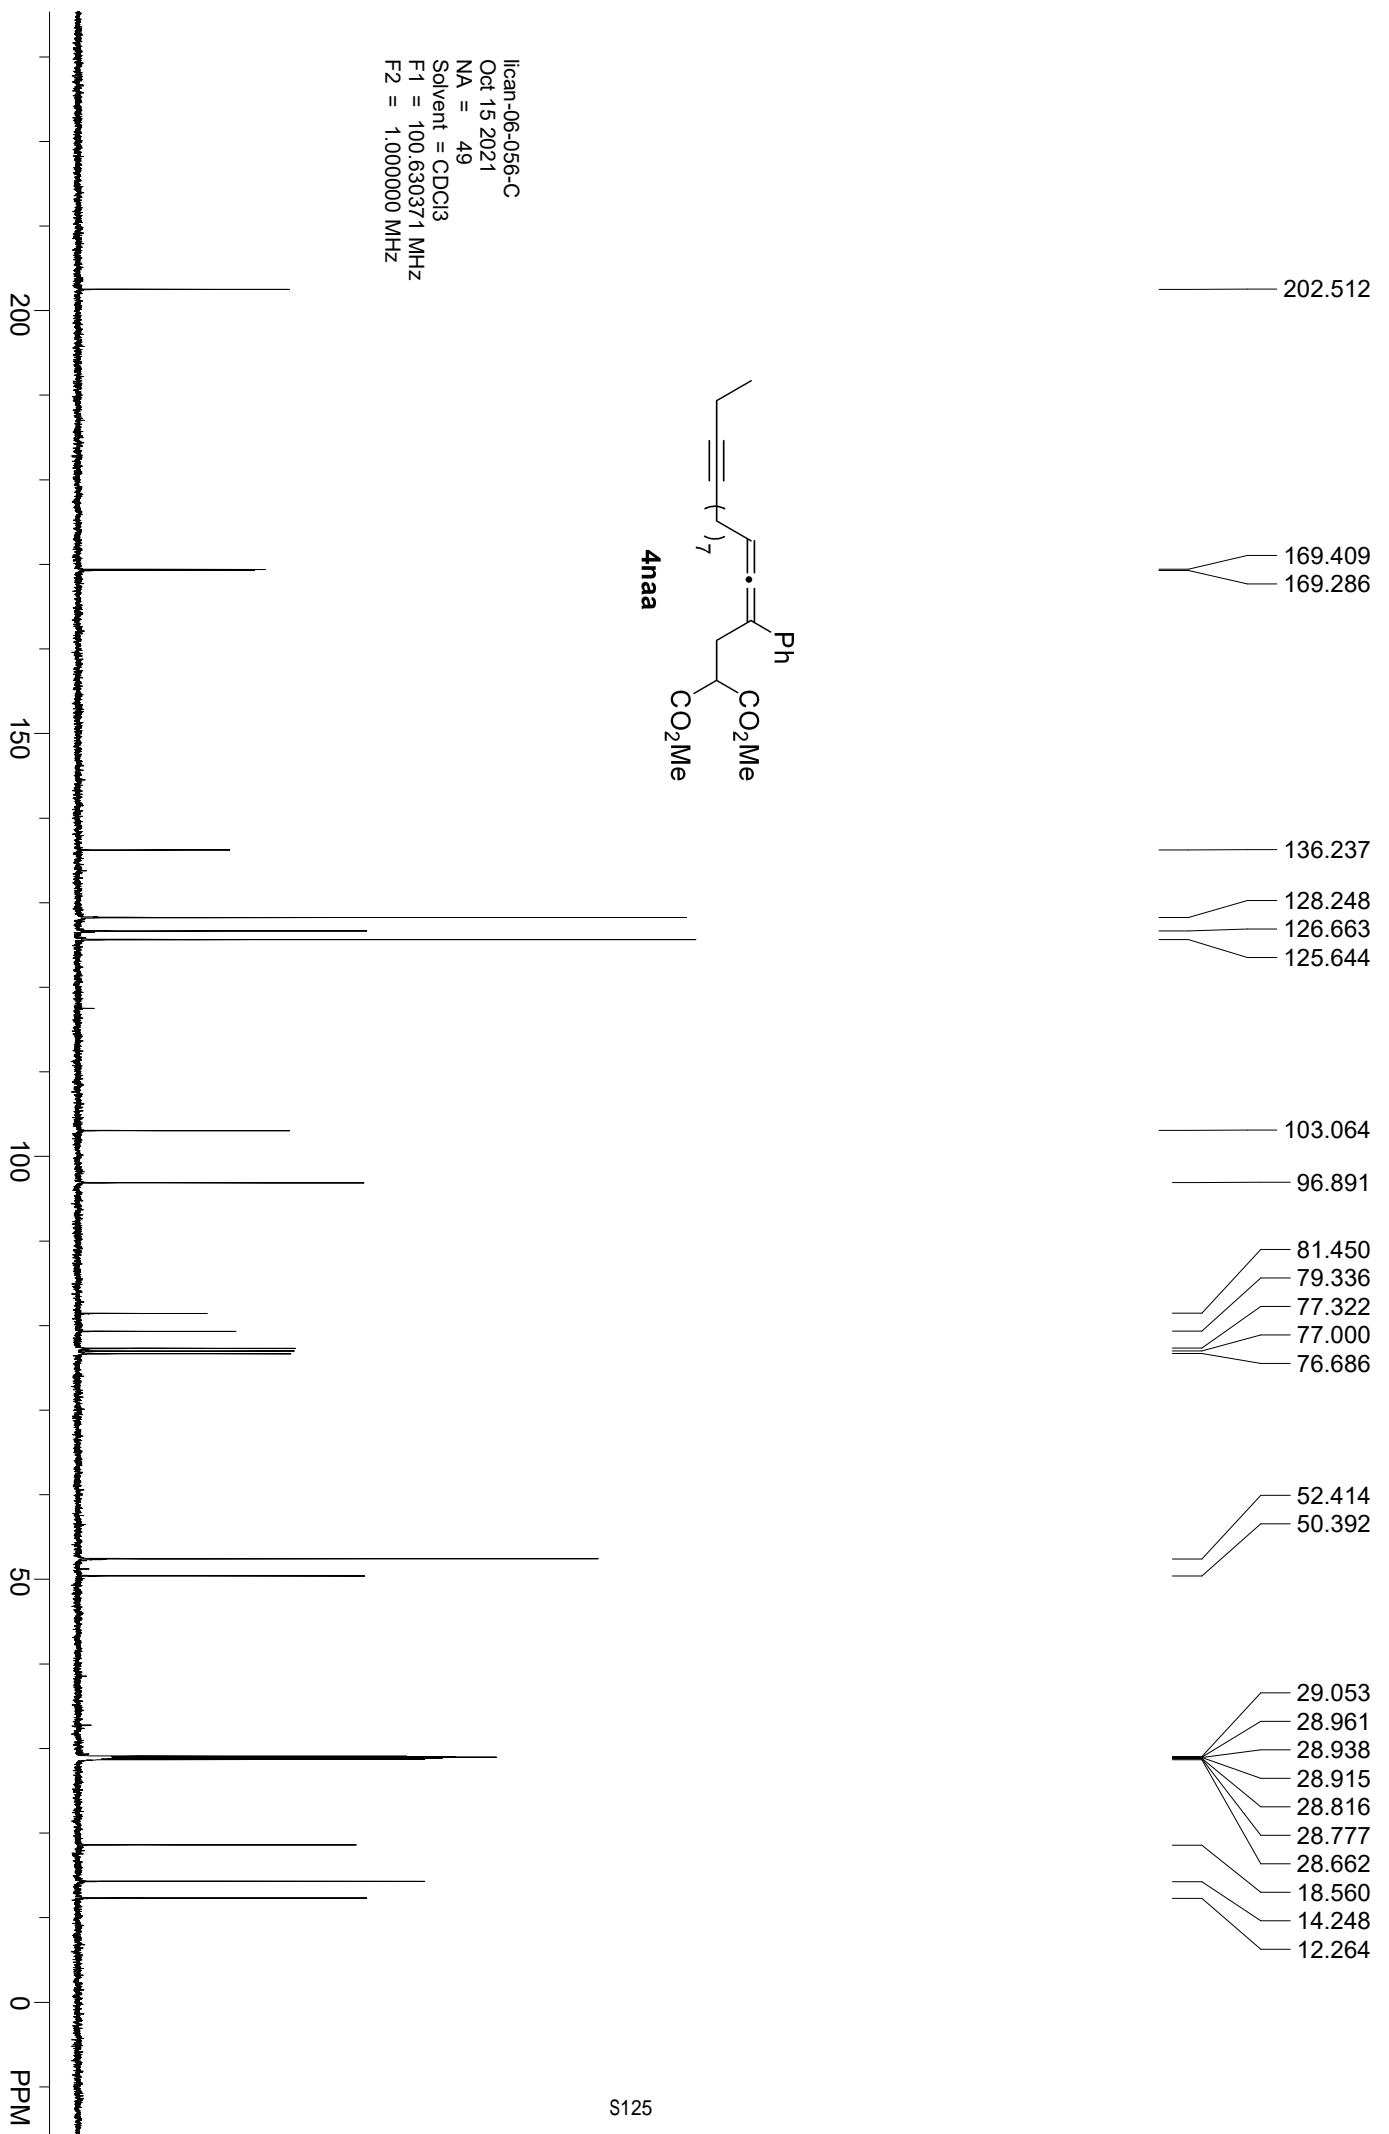

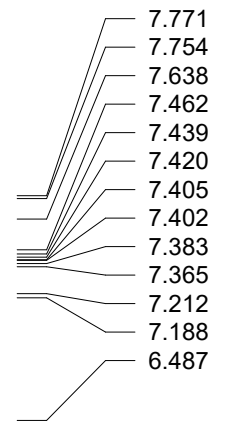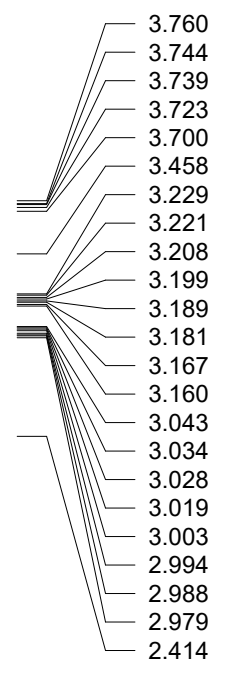

zzn-1-029-H  
 Aug 19 2021  
 NA = 4  
 Solvent = CDCl3  
 F1 = 400.031616 MHz  
 F2 = 100.596855 MHz

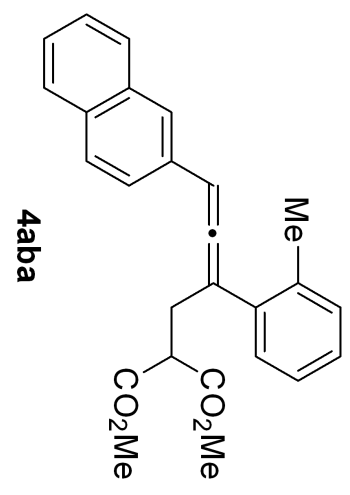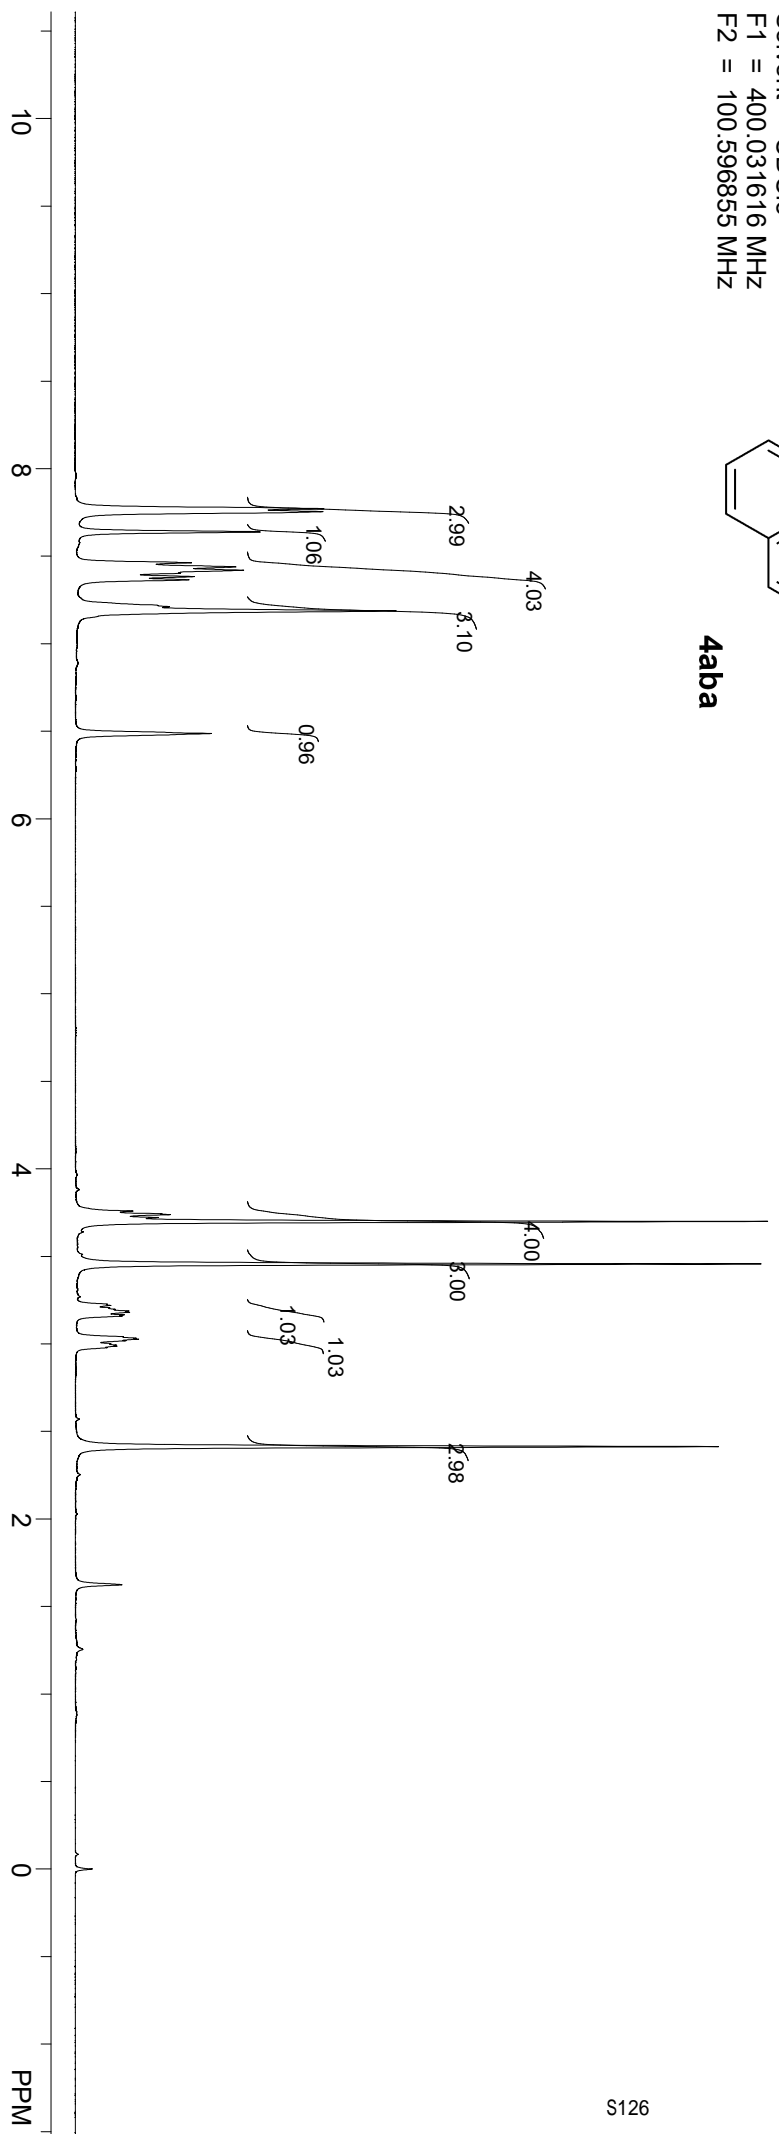

zZn-1-029-C  
Aug 19 2021  
NA = 80  
Solvent = cdcl3  
F1 = 100.598389 MHz  
F2 = 400.030792 MHz

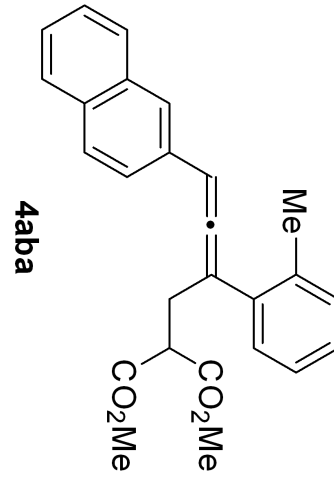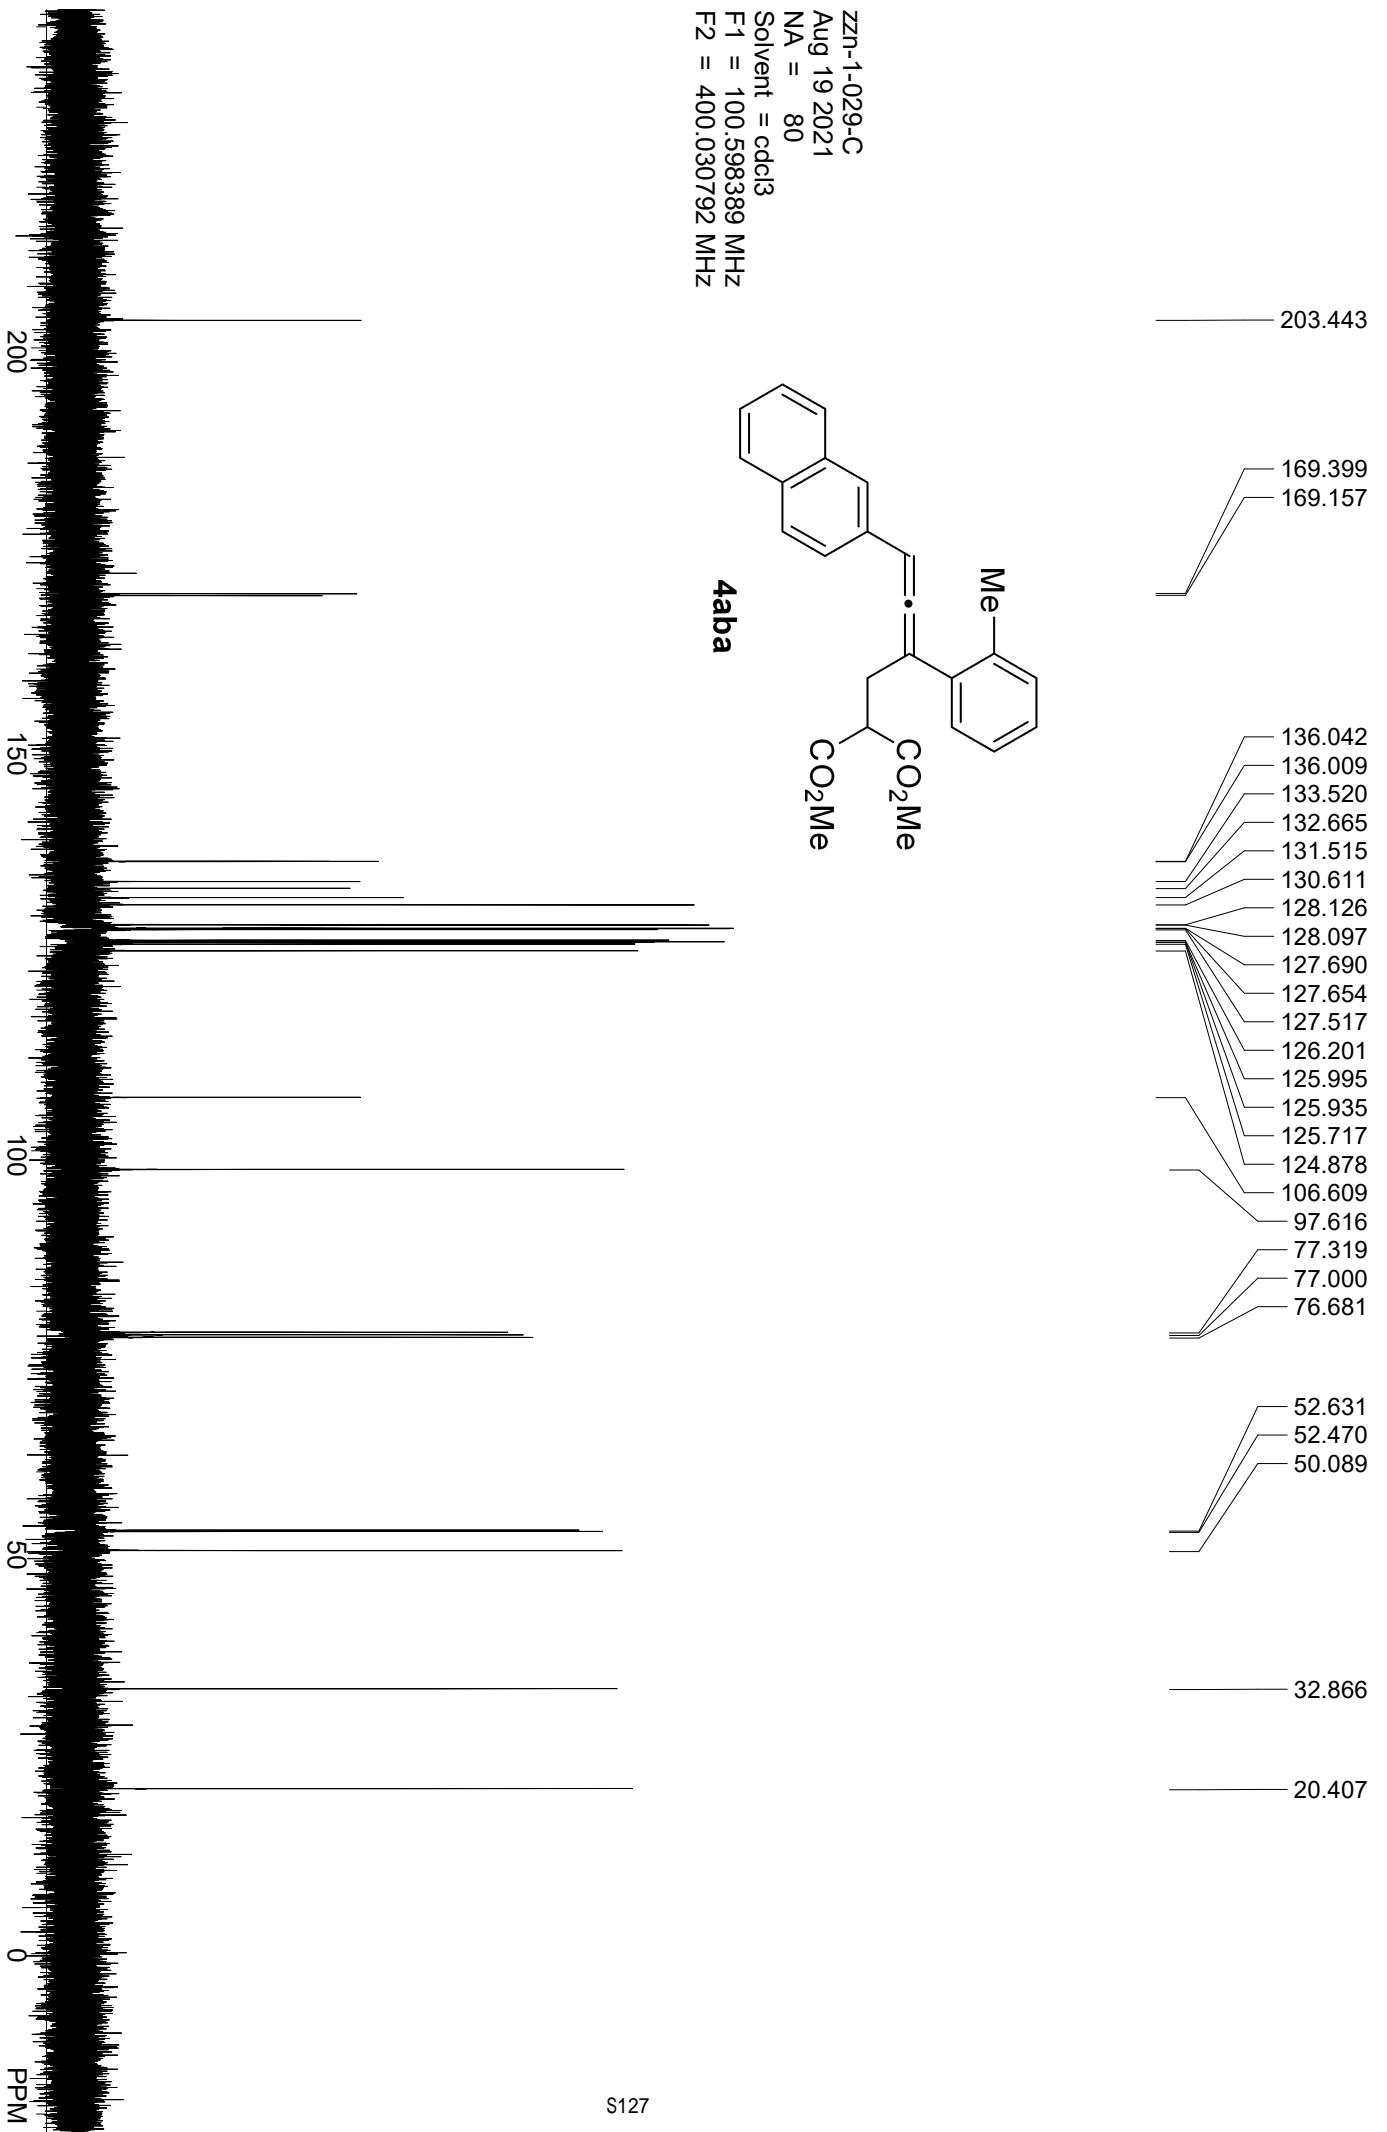

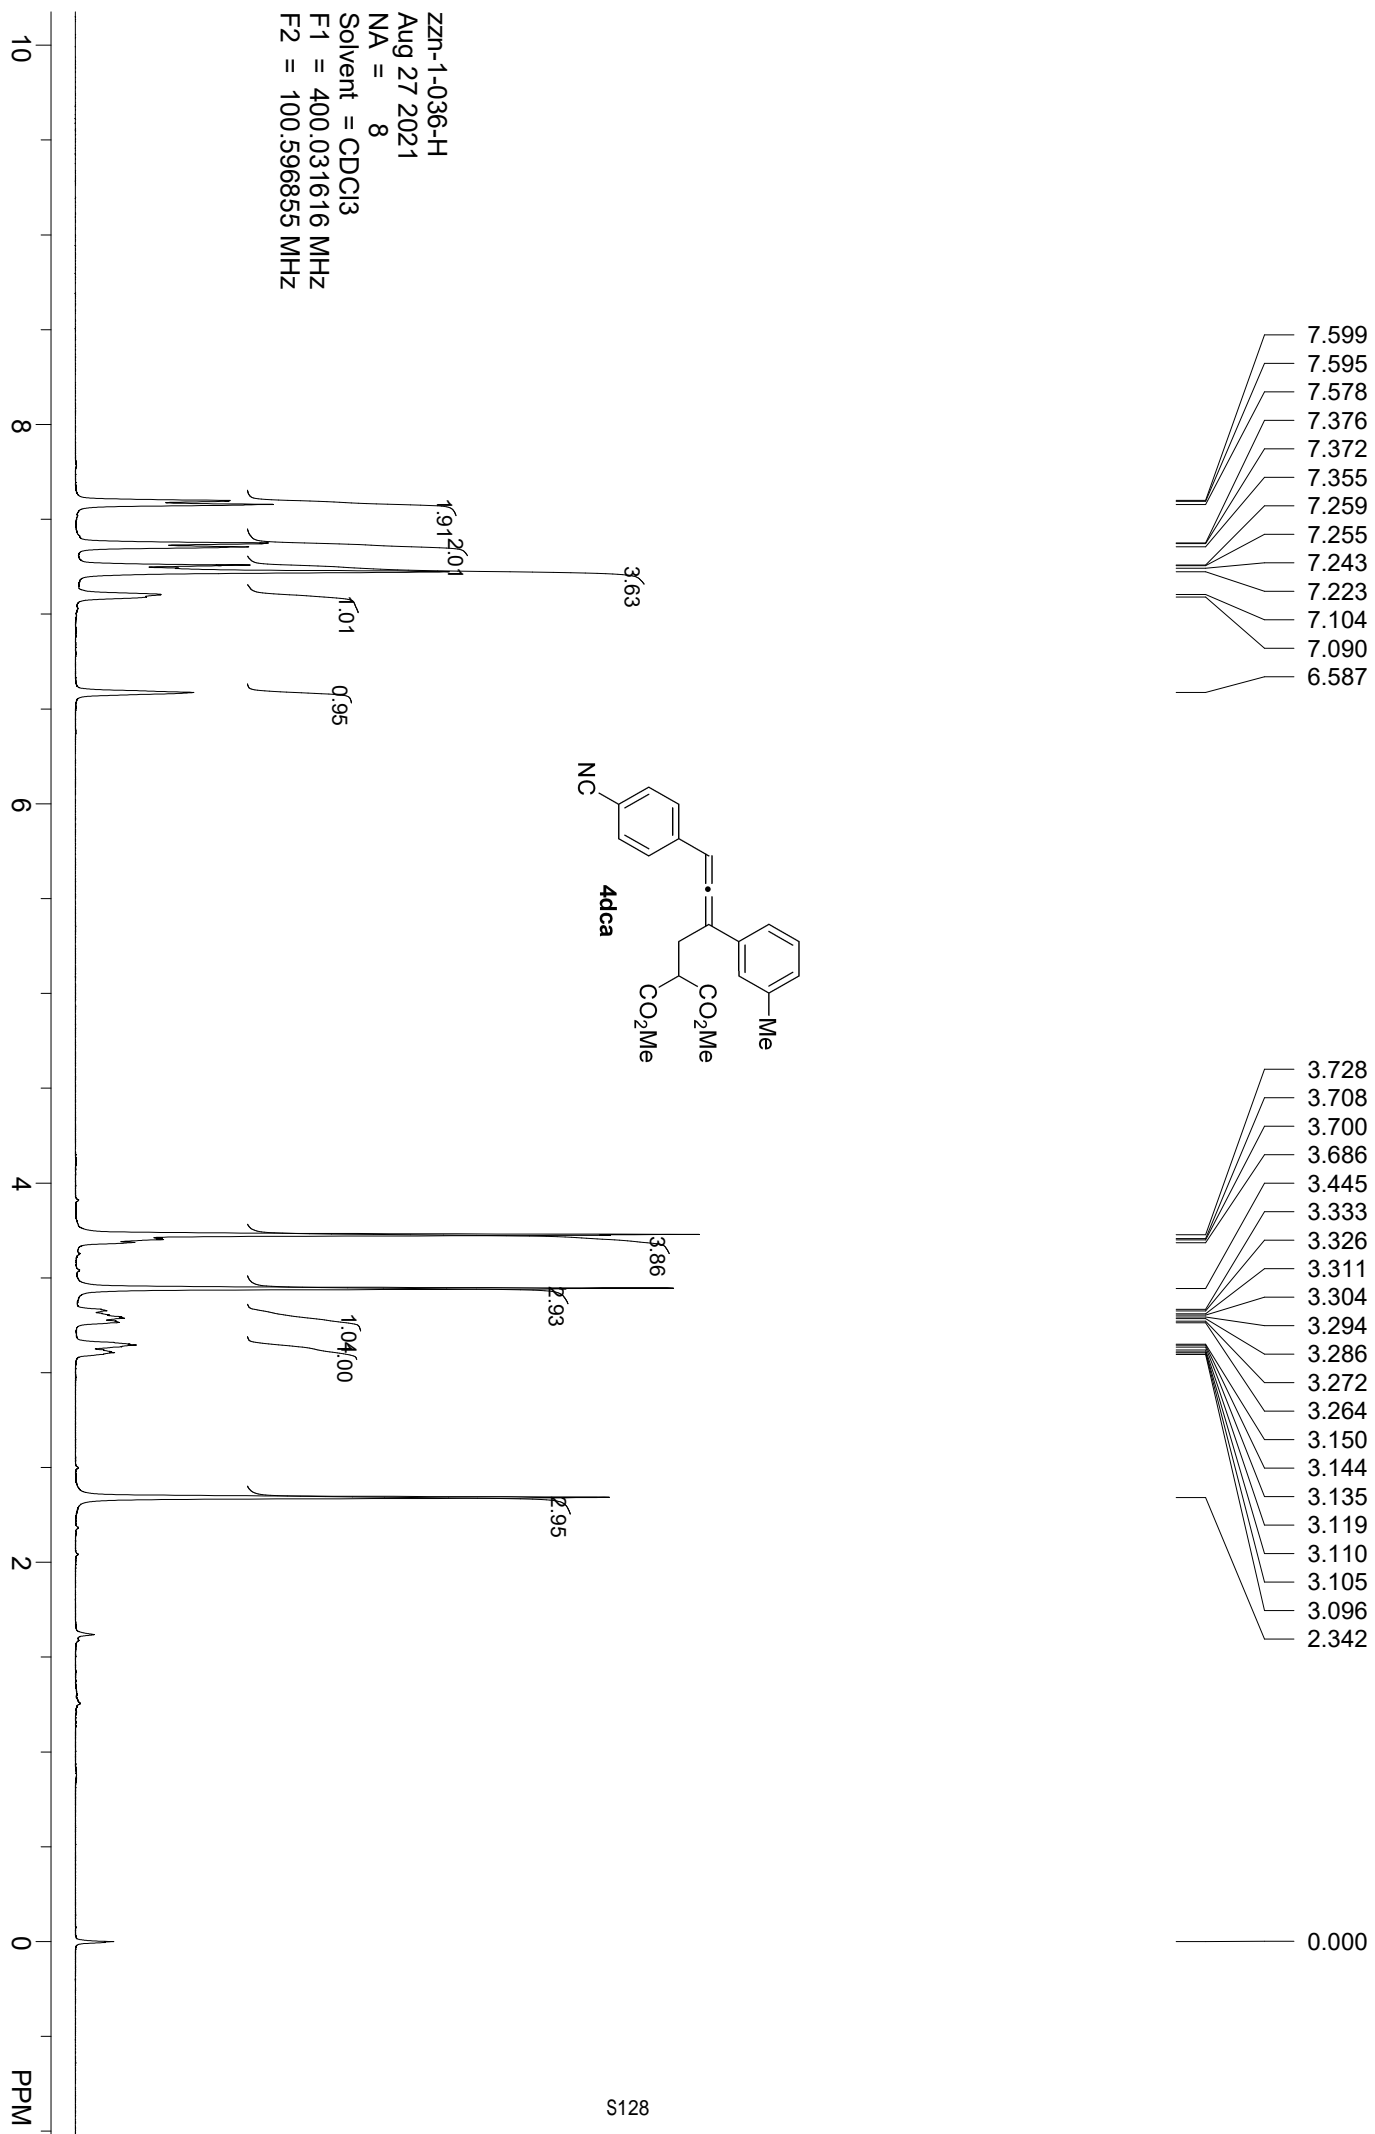



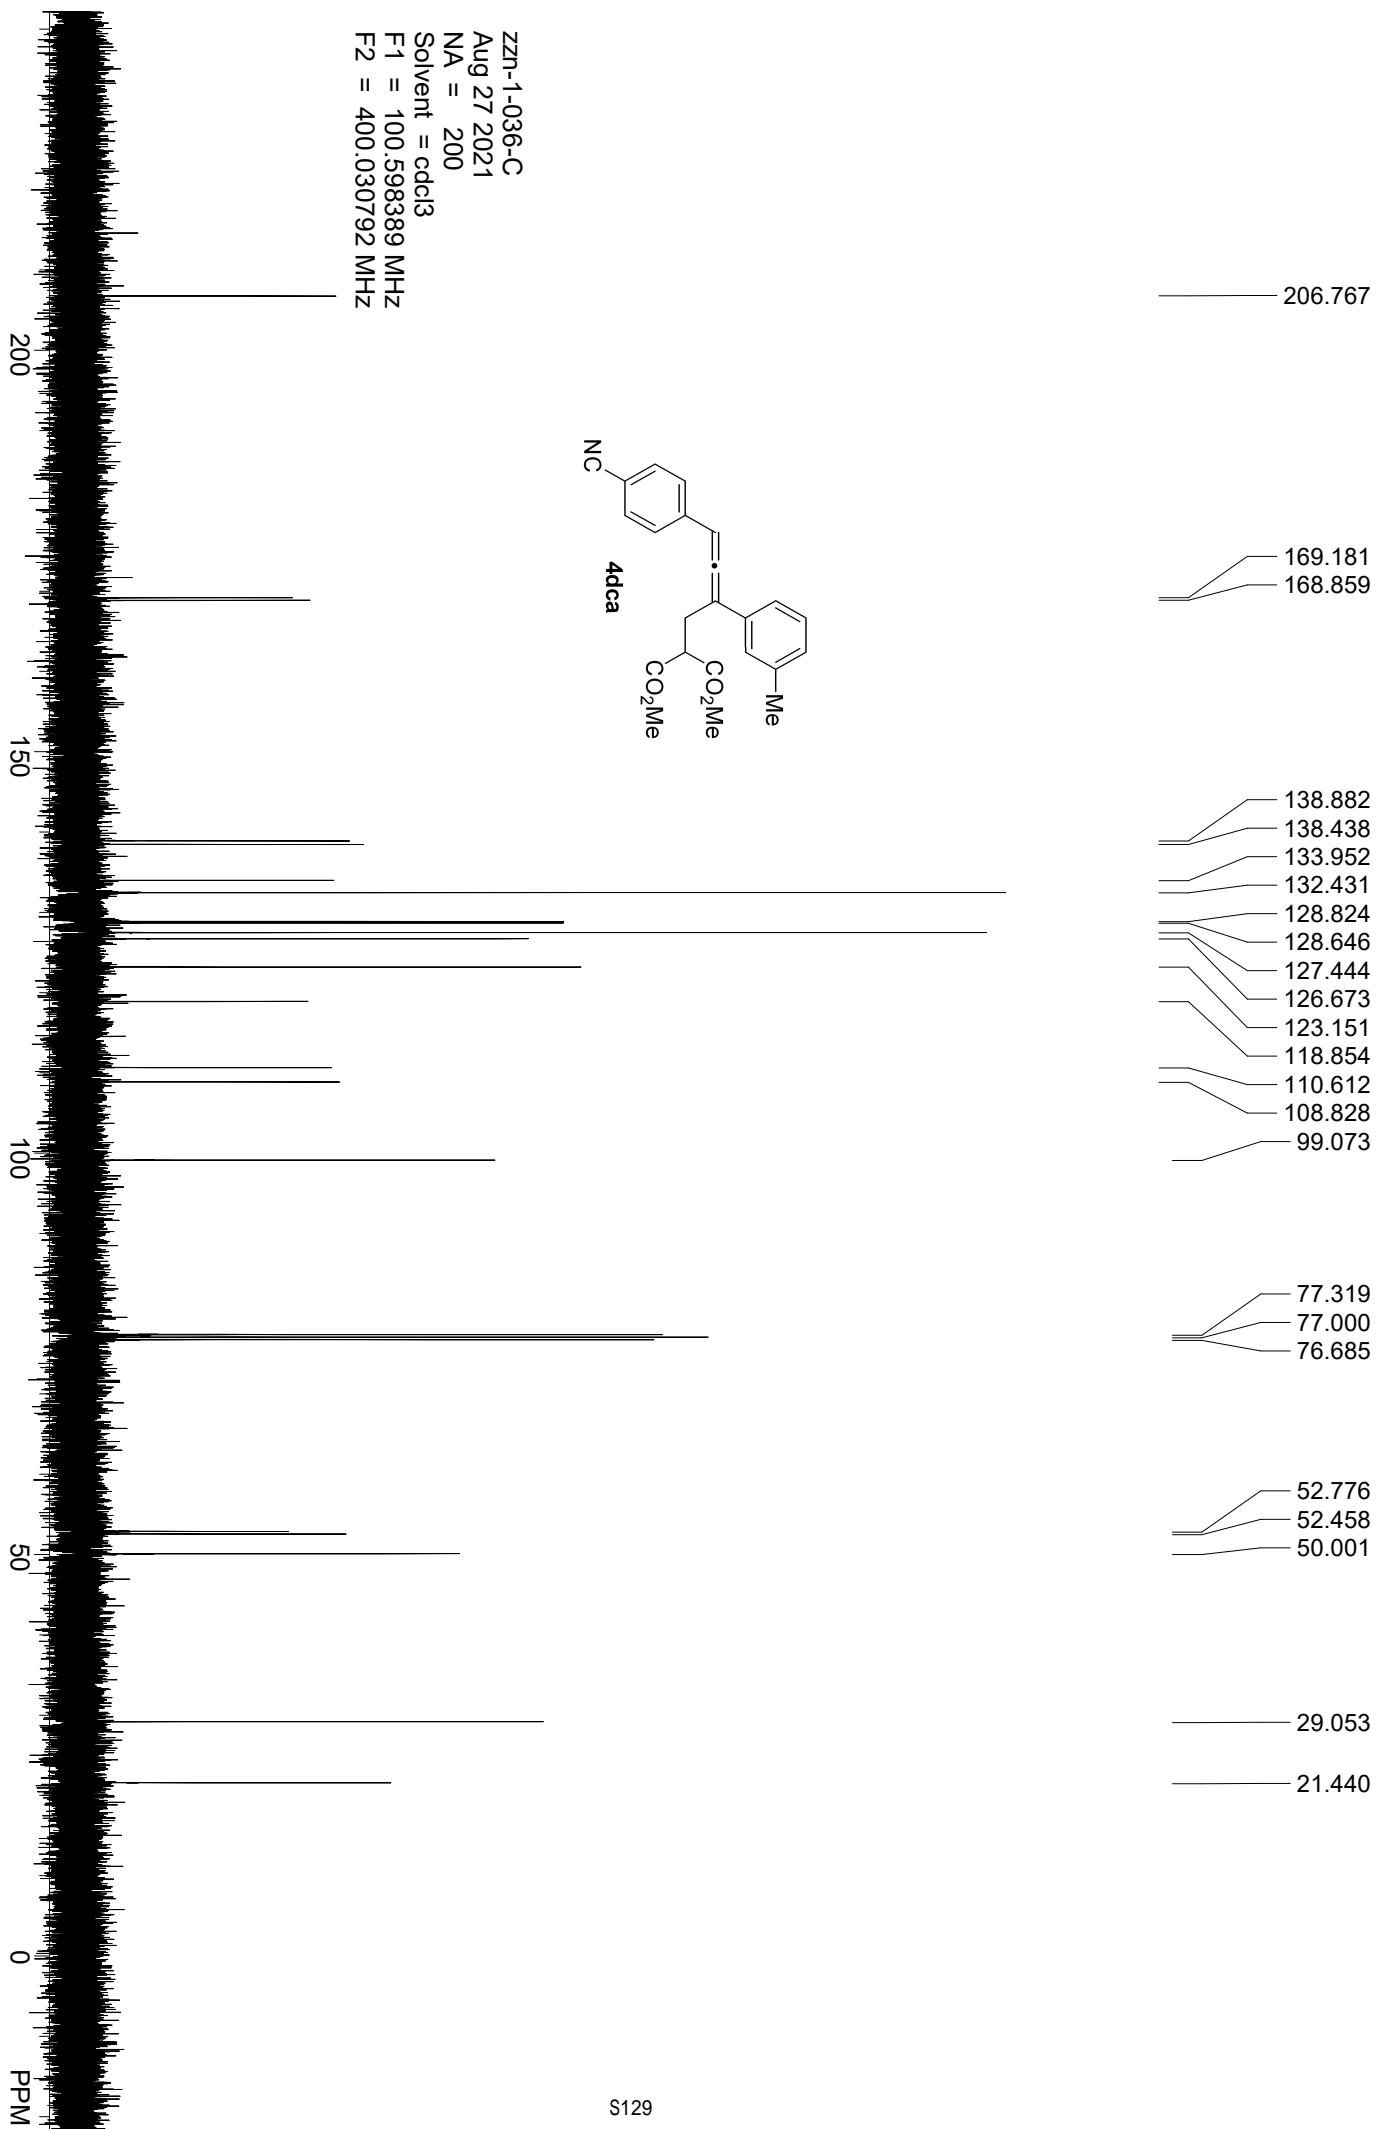

zzn-1-088-H  
Oct 25 2021  
NA = 4  
Solvent = CDCl3  
F1 = 399.717865 MHz  
F2 = 100.517960 MHz

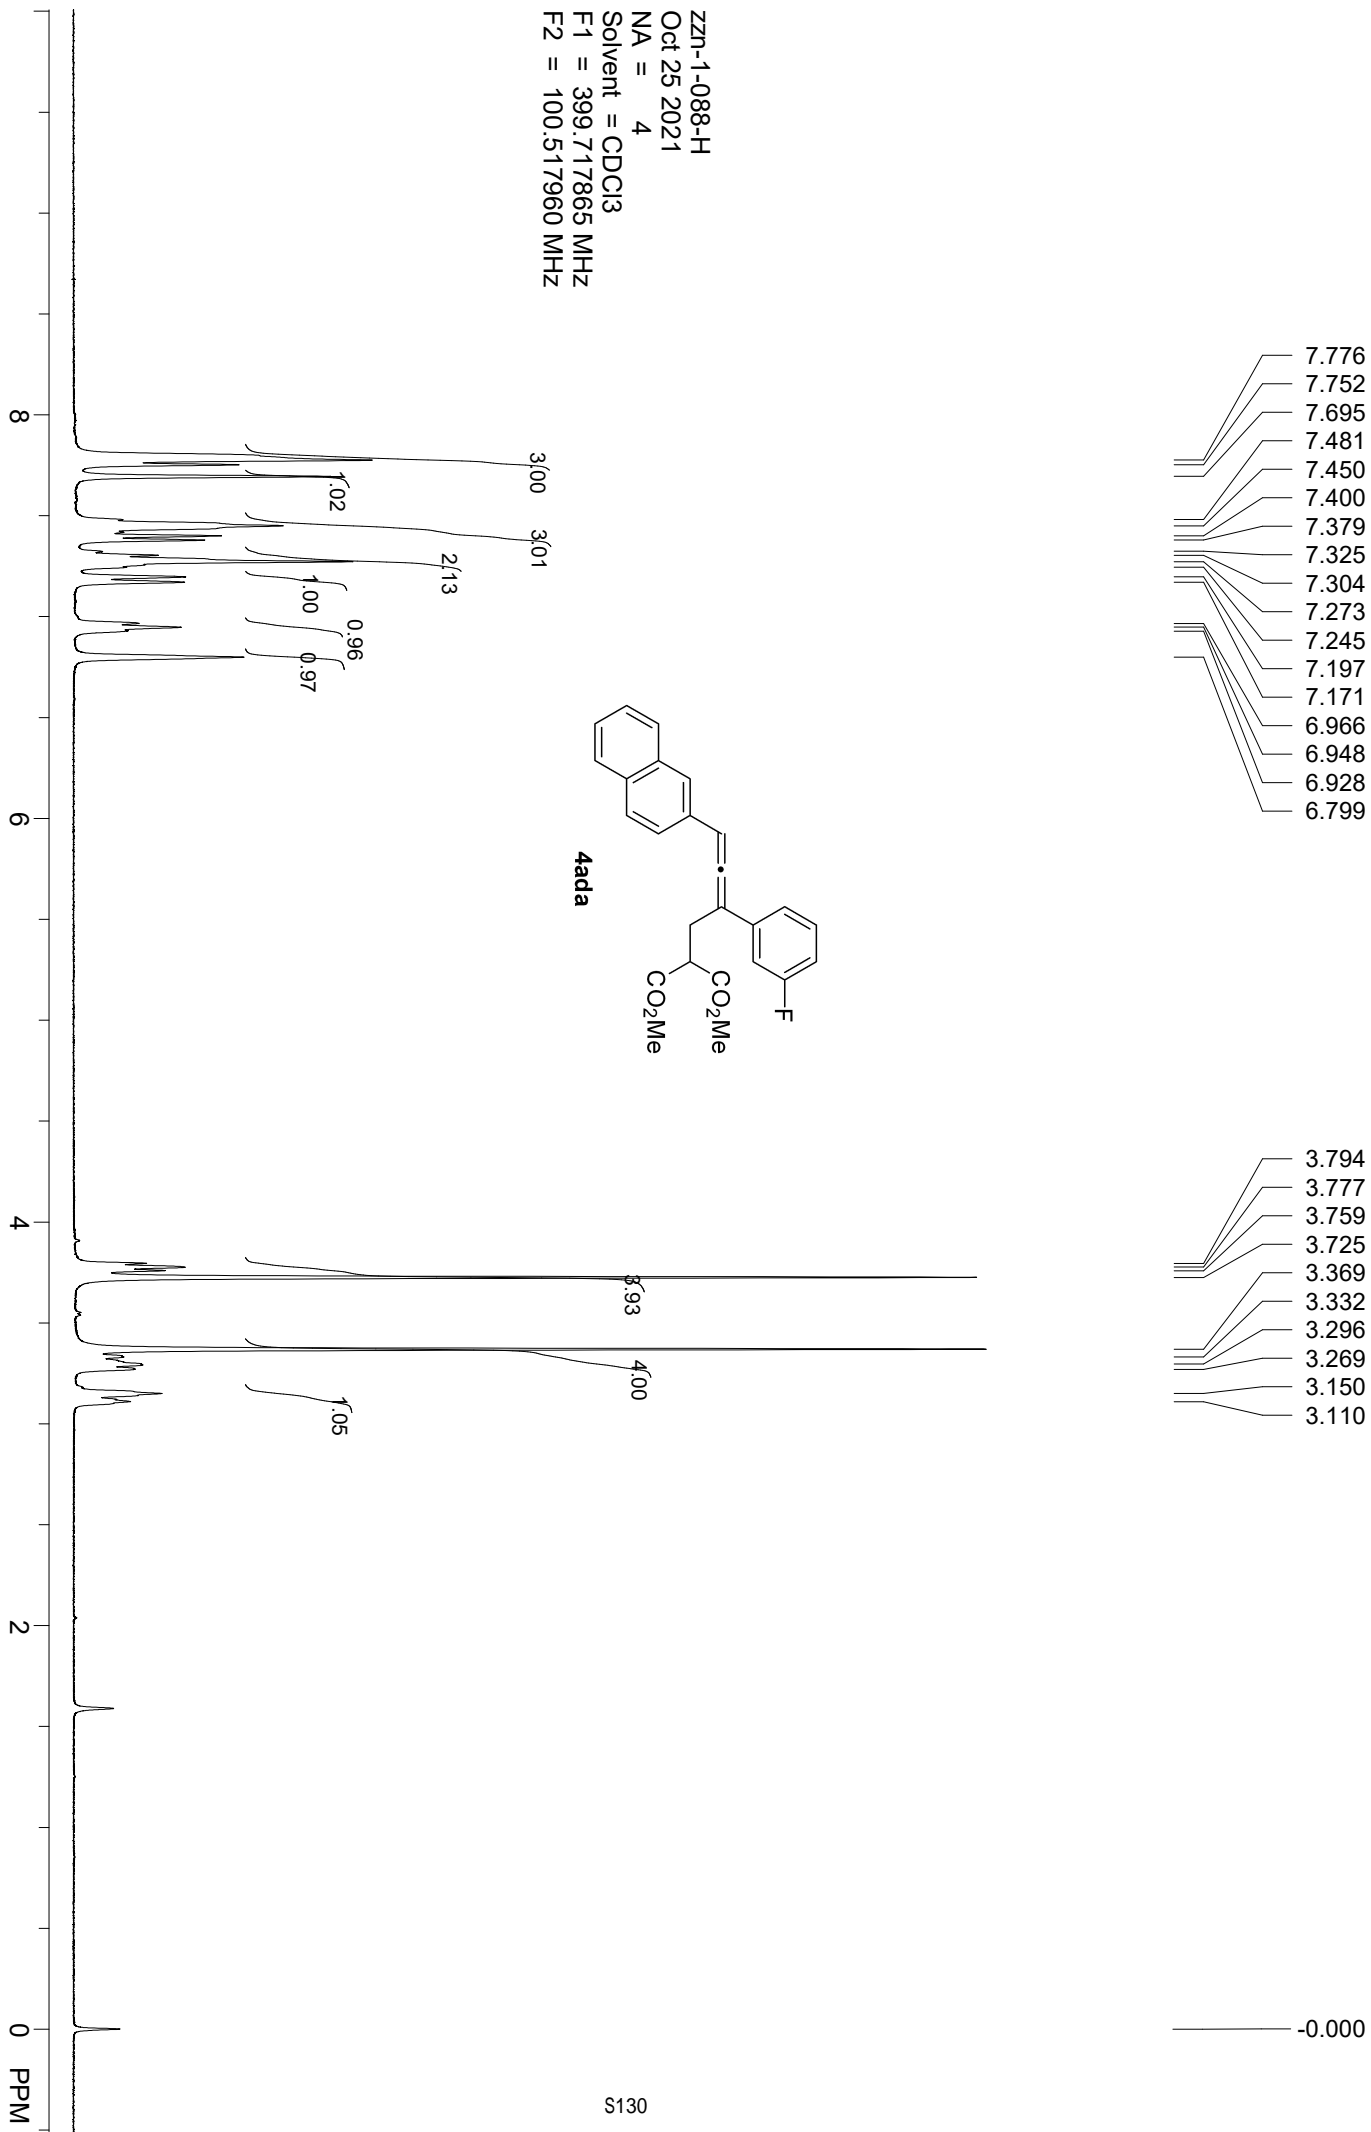

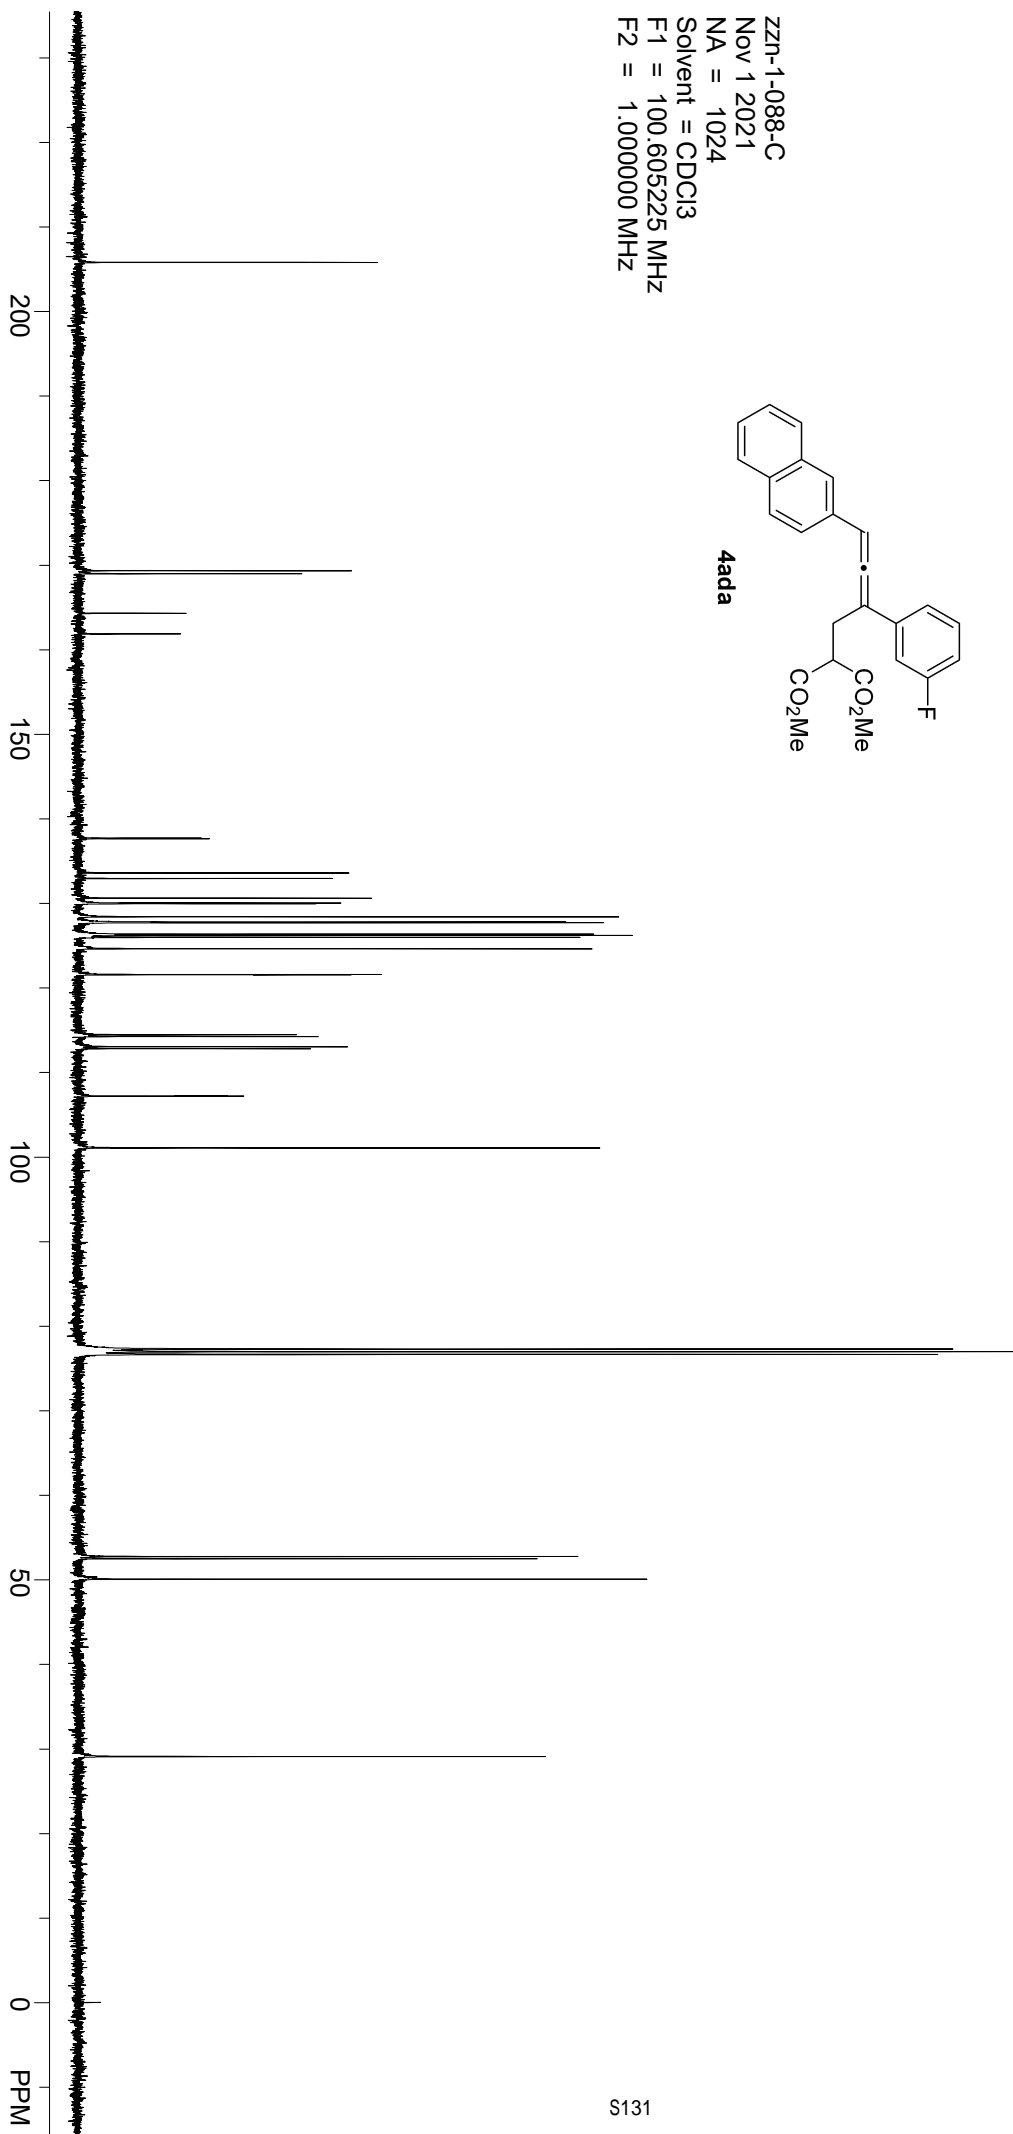

205.807

169.348  
168.995  
164.322  
161.878

137.738  
137.661  
133.608  
132.957  
130.636  
130.061  
129.977  
128.429  
127.809  
127.725  
126.376  
126.238  
126.009  
124.652  
121.603  
121.573  
114.478  
114.272  
113.069  
112.839  
107.239  
107.208  
101.094

77.314  
77.000  
76.678  
52.745  
52.484  
50.071

29.072

zZn-1-088-F  
Nov 1 2021  
NA = 4  
Solvent = CDCl3  
F1 = 376.406921 MHz  
F2 = 100.596855 MHz

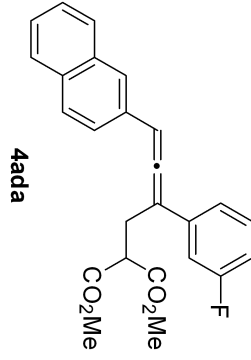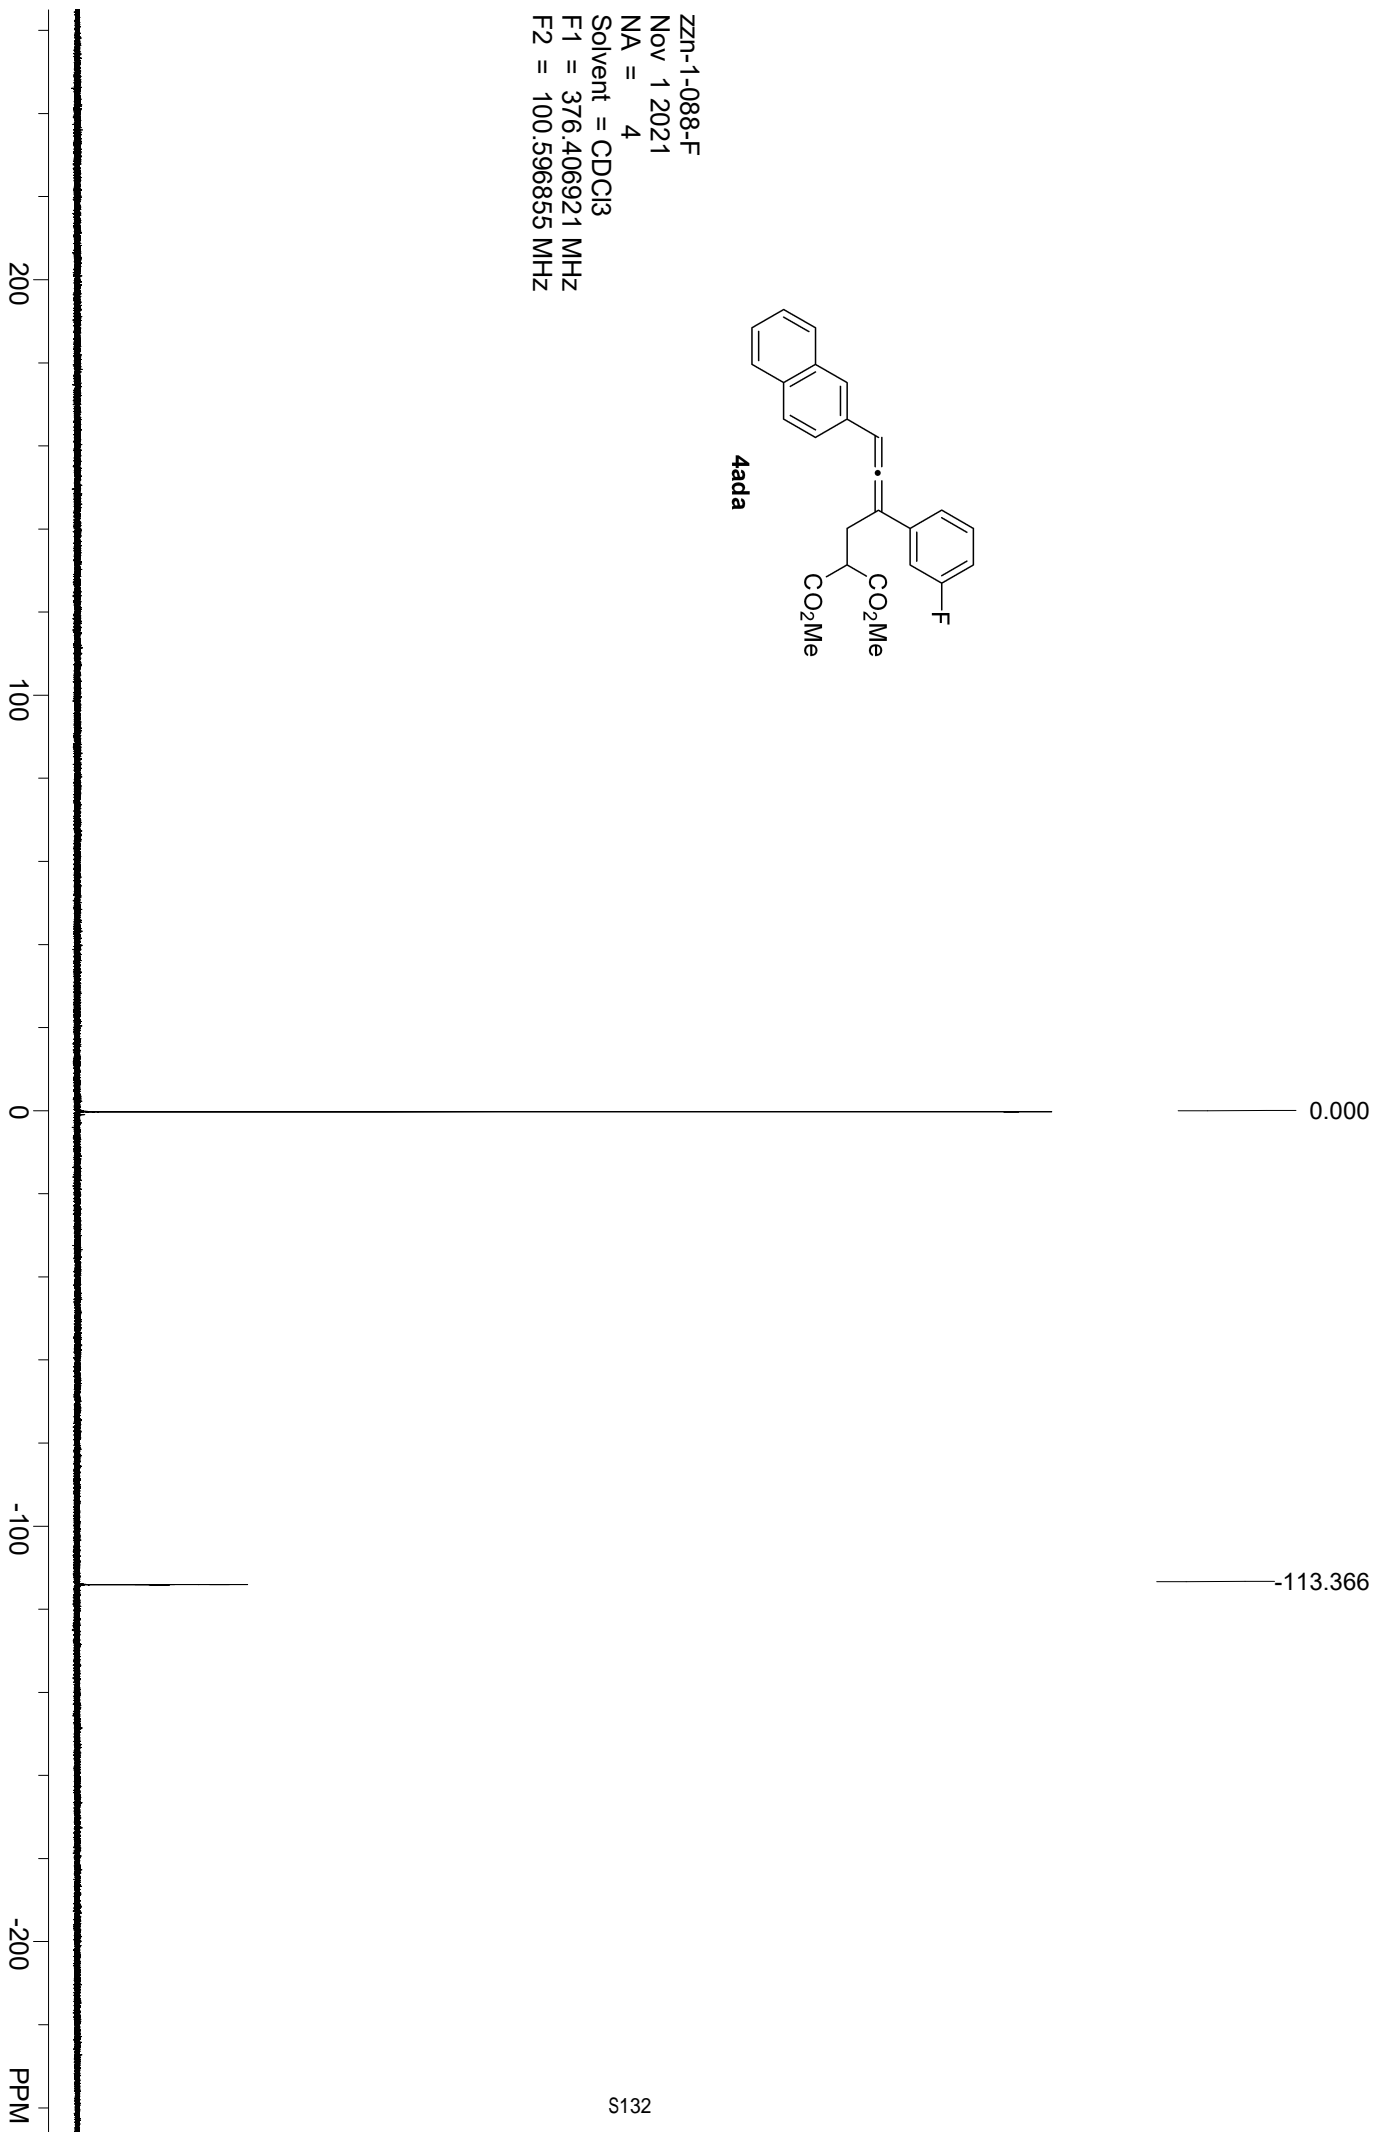

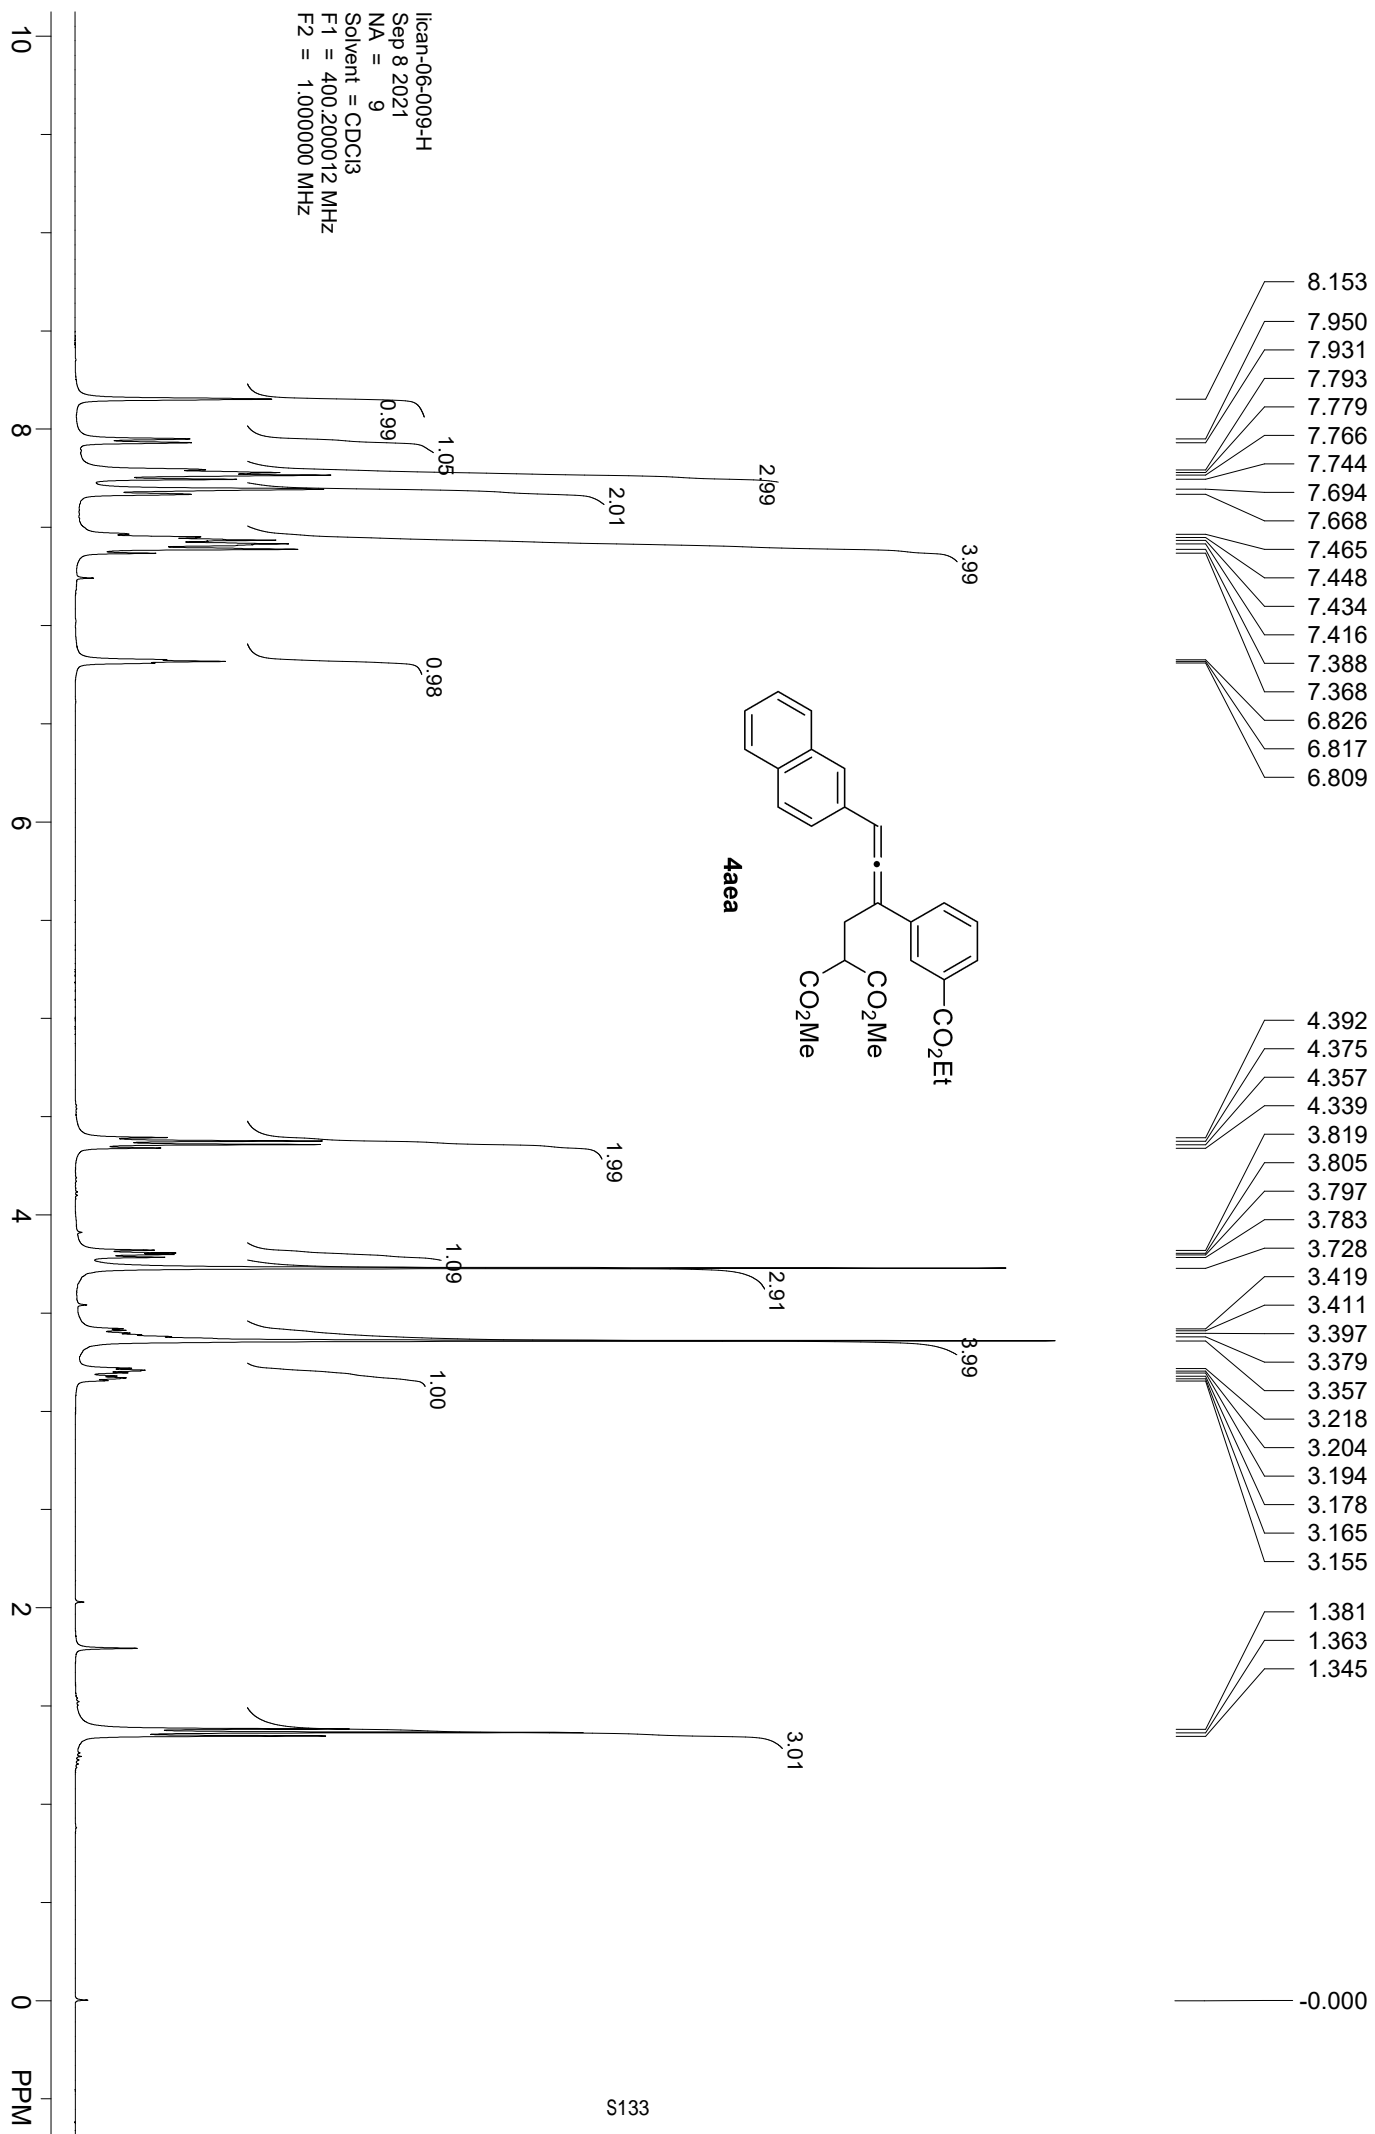

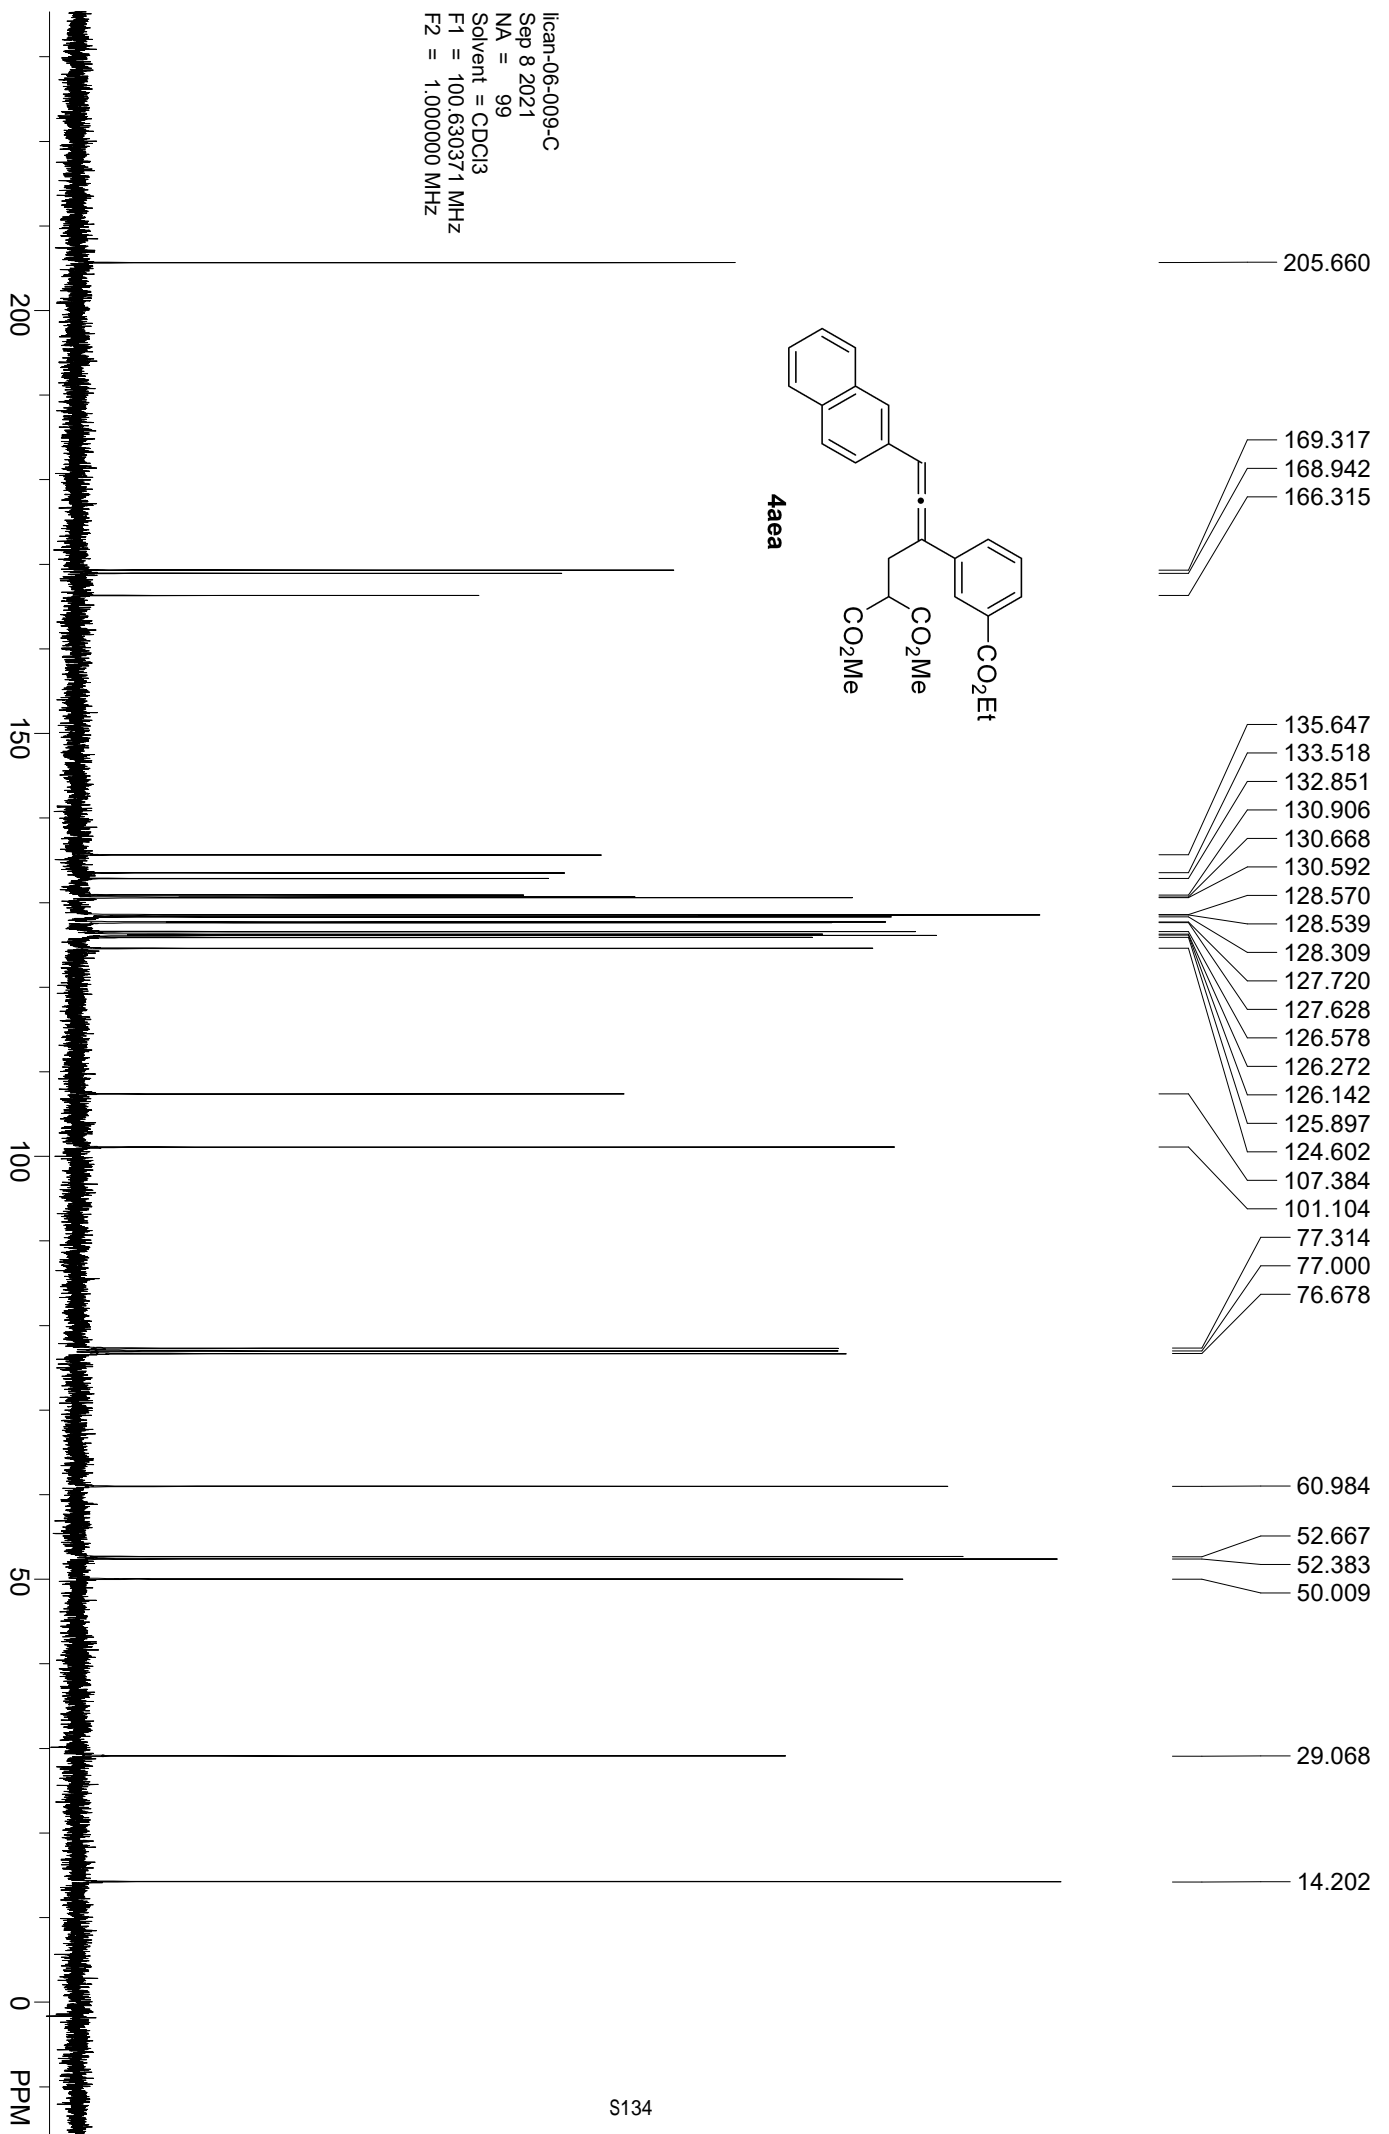

lican-05-138-H  
Jun 25 2021  
NA = 8  
Solvent = CDCl3  
F1 = 399.723236 MHz  
F2 = 100.519203 MHz

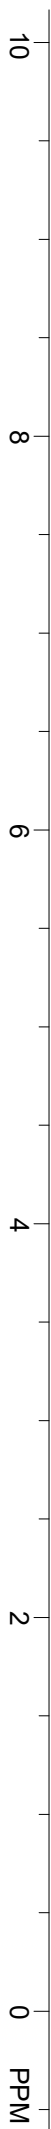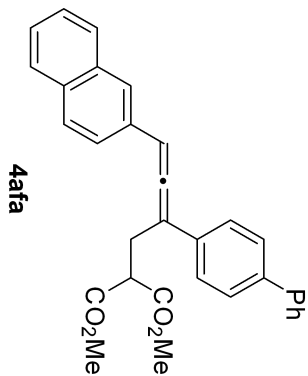

- 7.808
- 7.795
- 7.779
- 7.757
- 7.715
- 7.595
- 7.573
- 7.548
- 7.481
- 7.466
- 7.447
- 7.428
- 7.409
- 7.352
- 7.333
- 7.315
- 6.820
- 6.812
- 6.804

- 3.837
- 3.822
- 3.815
- 3.800
- 3.733
- 3.384
- 3.364
- 3.356
- 3.343
- 3.334
- 3.234
- 3.220
- 3.211
- 3.195
- 3.181
- 3.171

-0.000

lican-05-138-C  
Jun 25 2021  
NA = 480  
Solvent = cdcl3  
F1 = 100.520737 MHz  
F2 = 399.722015 MHz

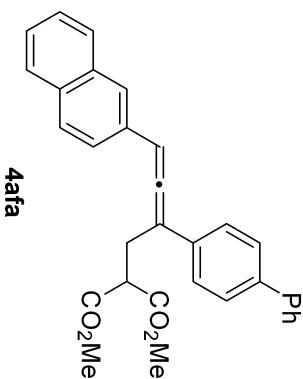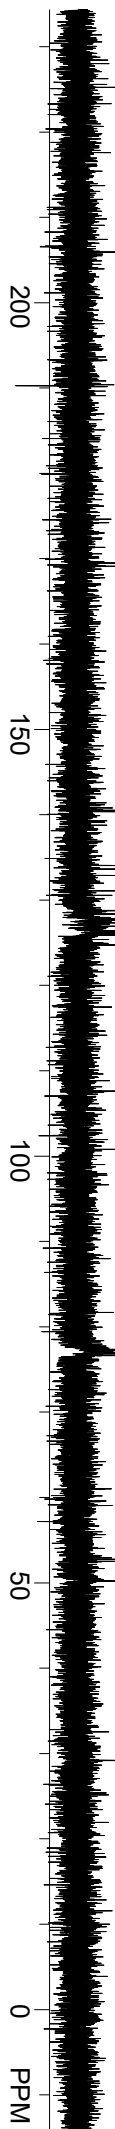

205.932

169.503  
169.124

140.536  
140.362  
134.061  
133.644  
132.900  
131.093  
128.770  
128.368  
127.791  
127.723  
127.351  
127.320  
126.941  
126.417  
126.318  
126.083  
125.893  
124.755  
107.629  
100.813  
77.311  
77.000  
76.681

52.747  
52.489  
50.189

29.147



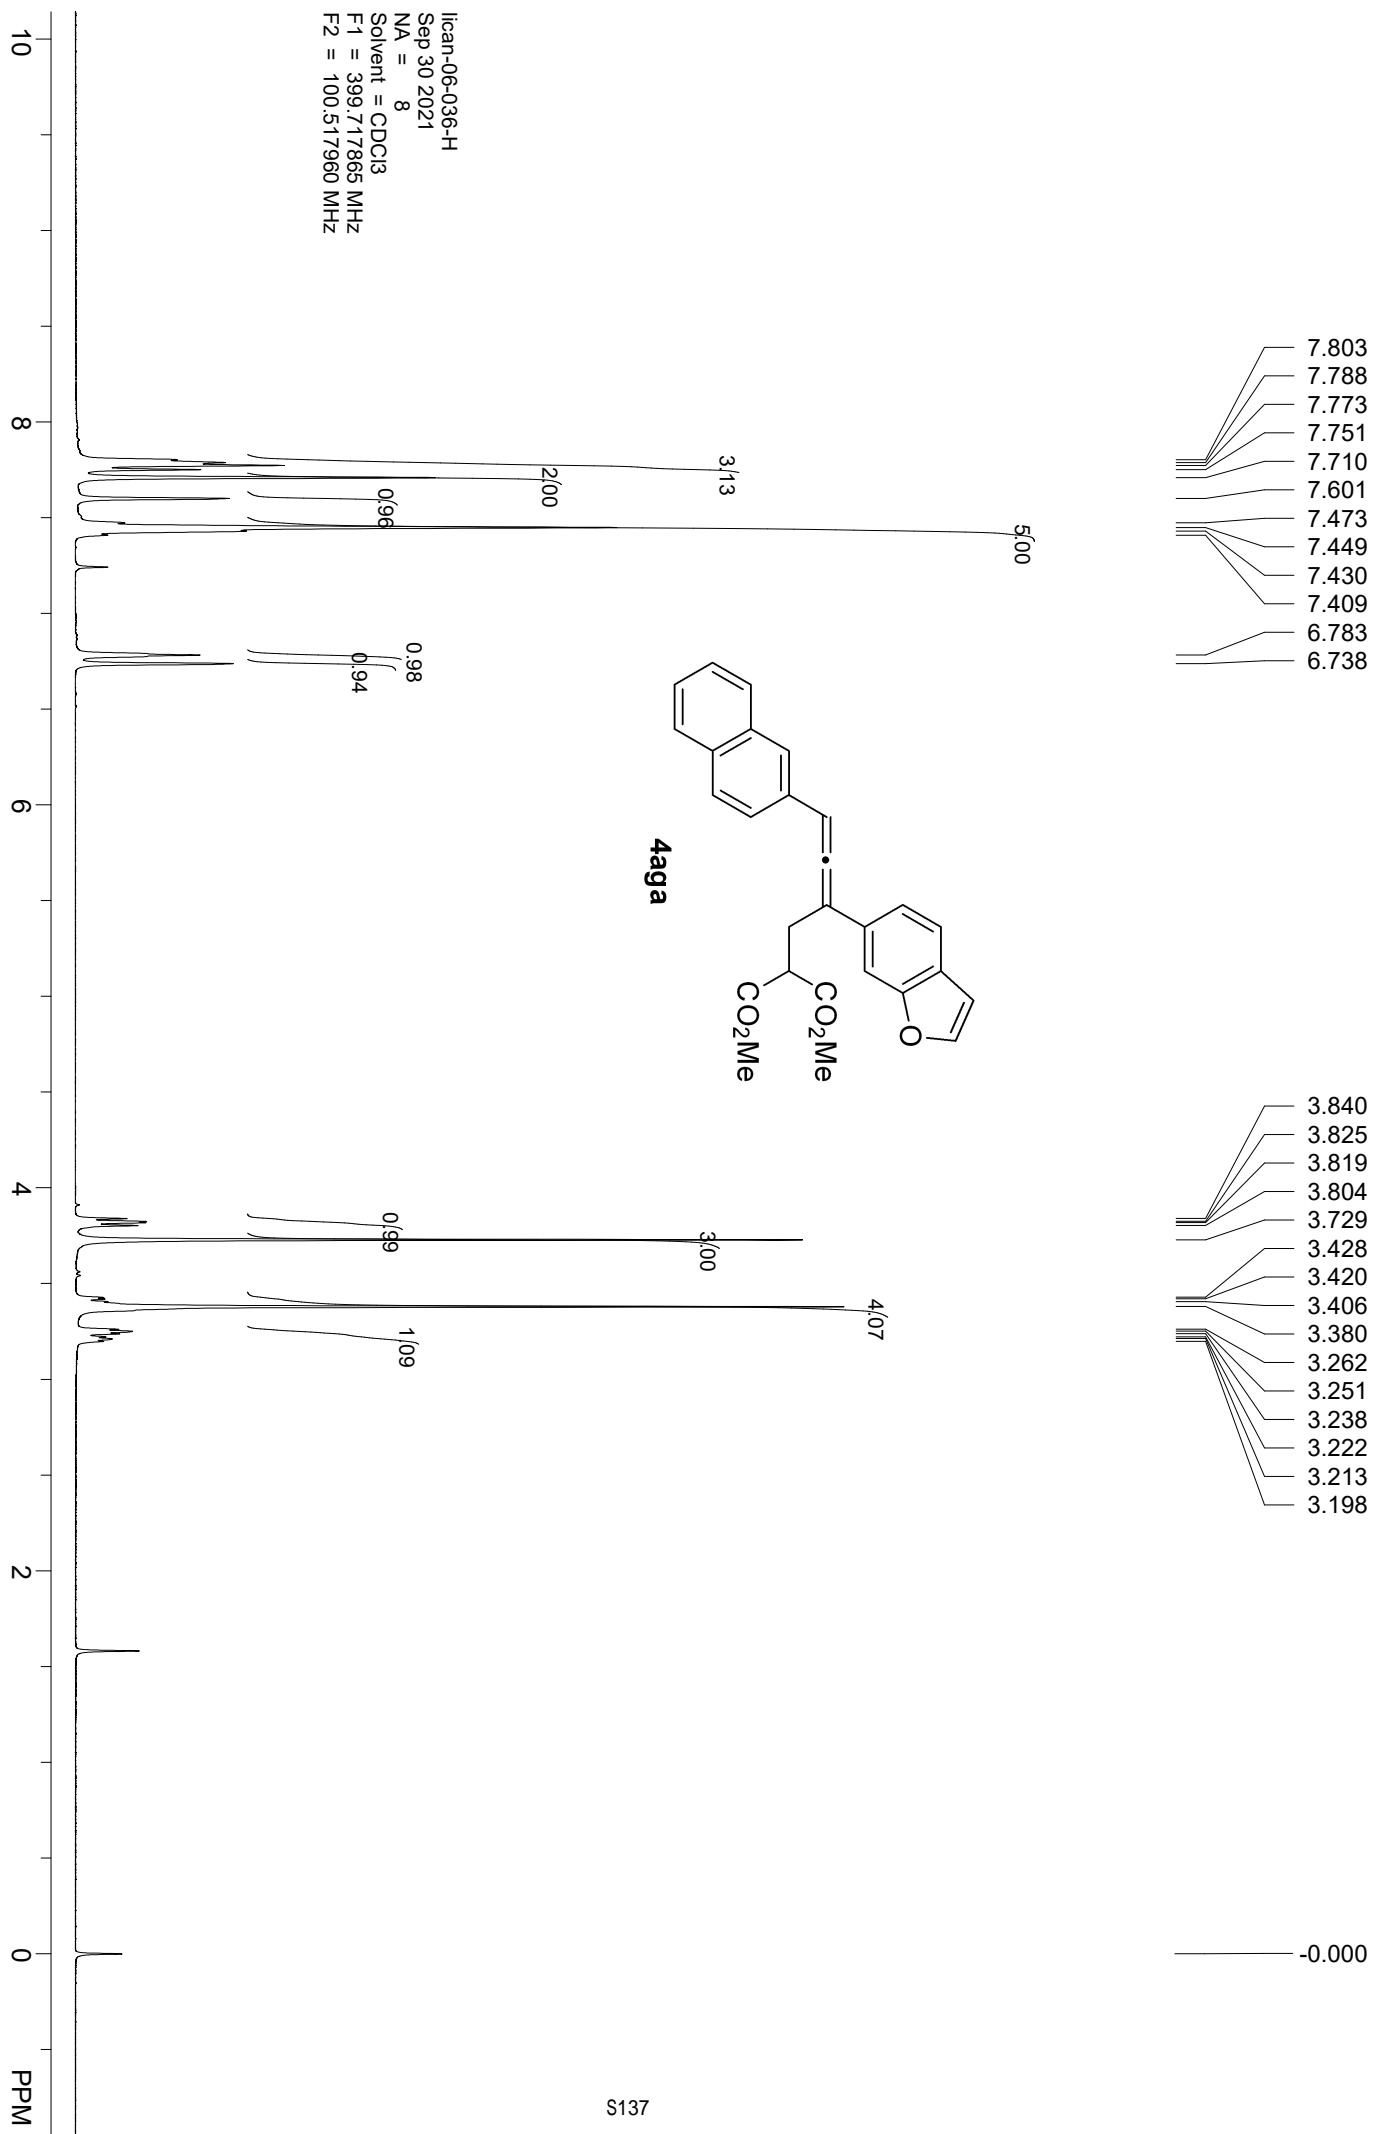

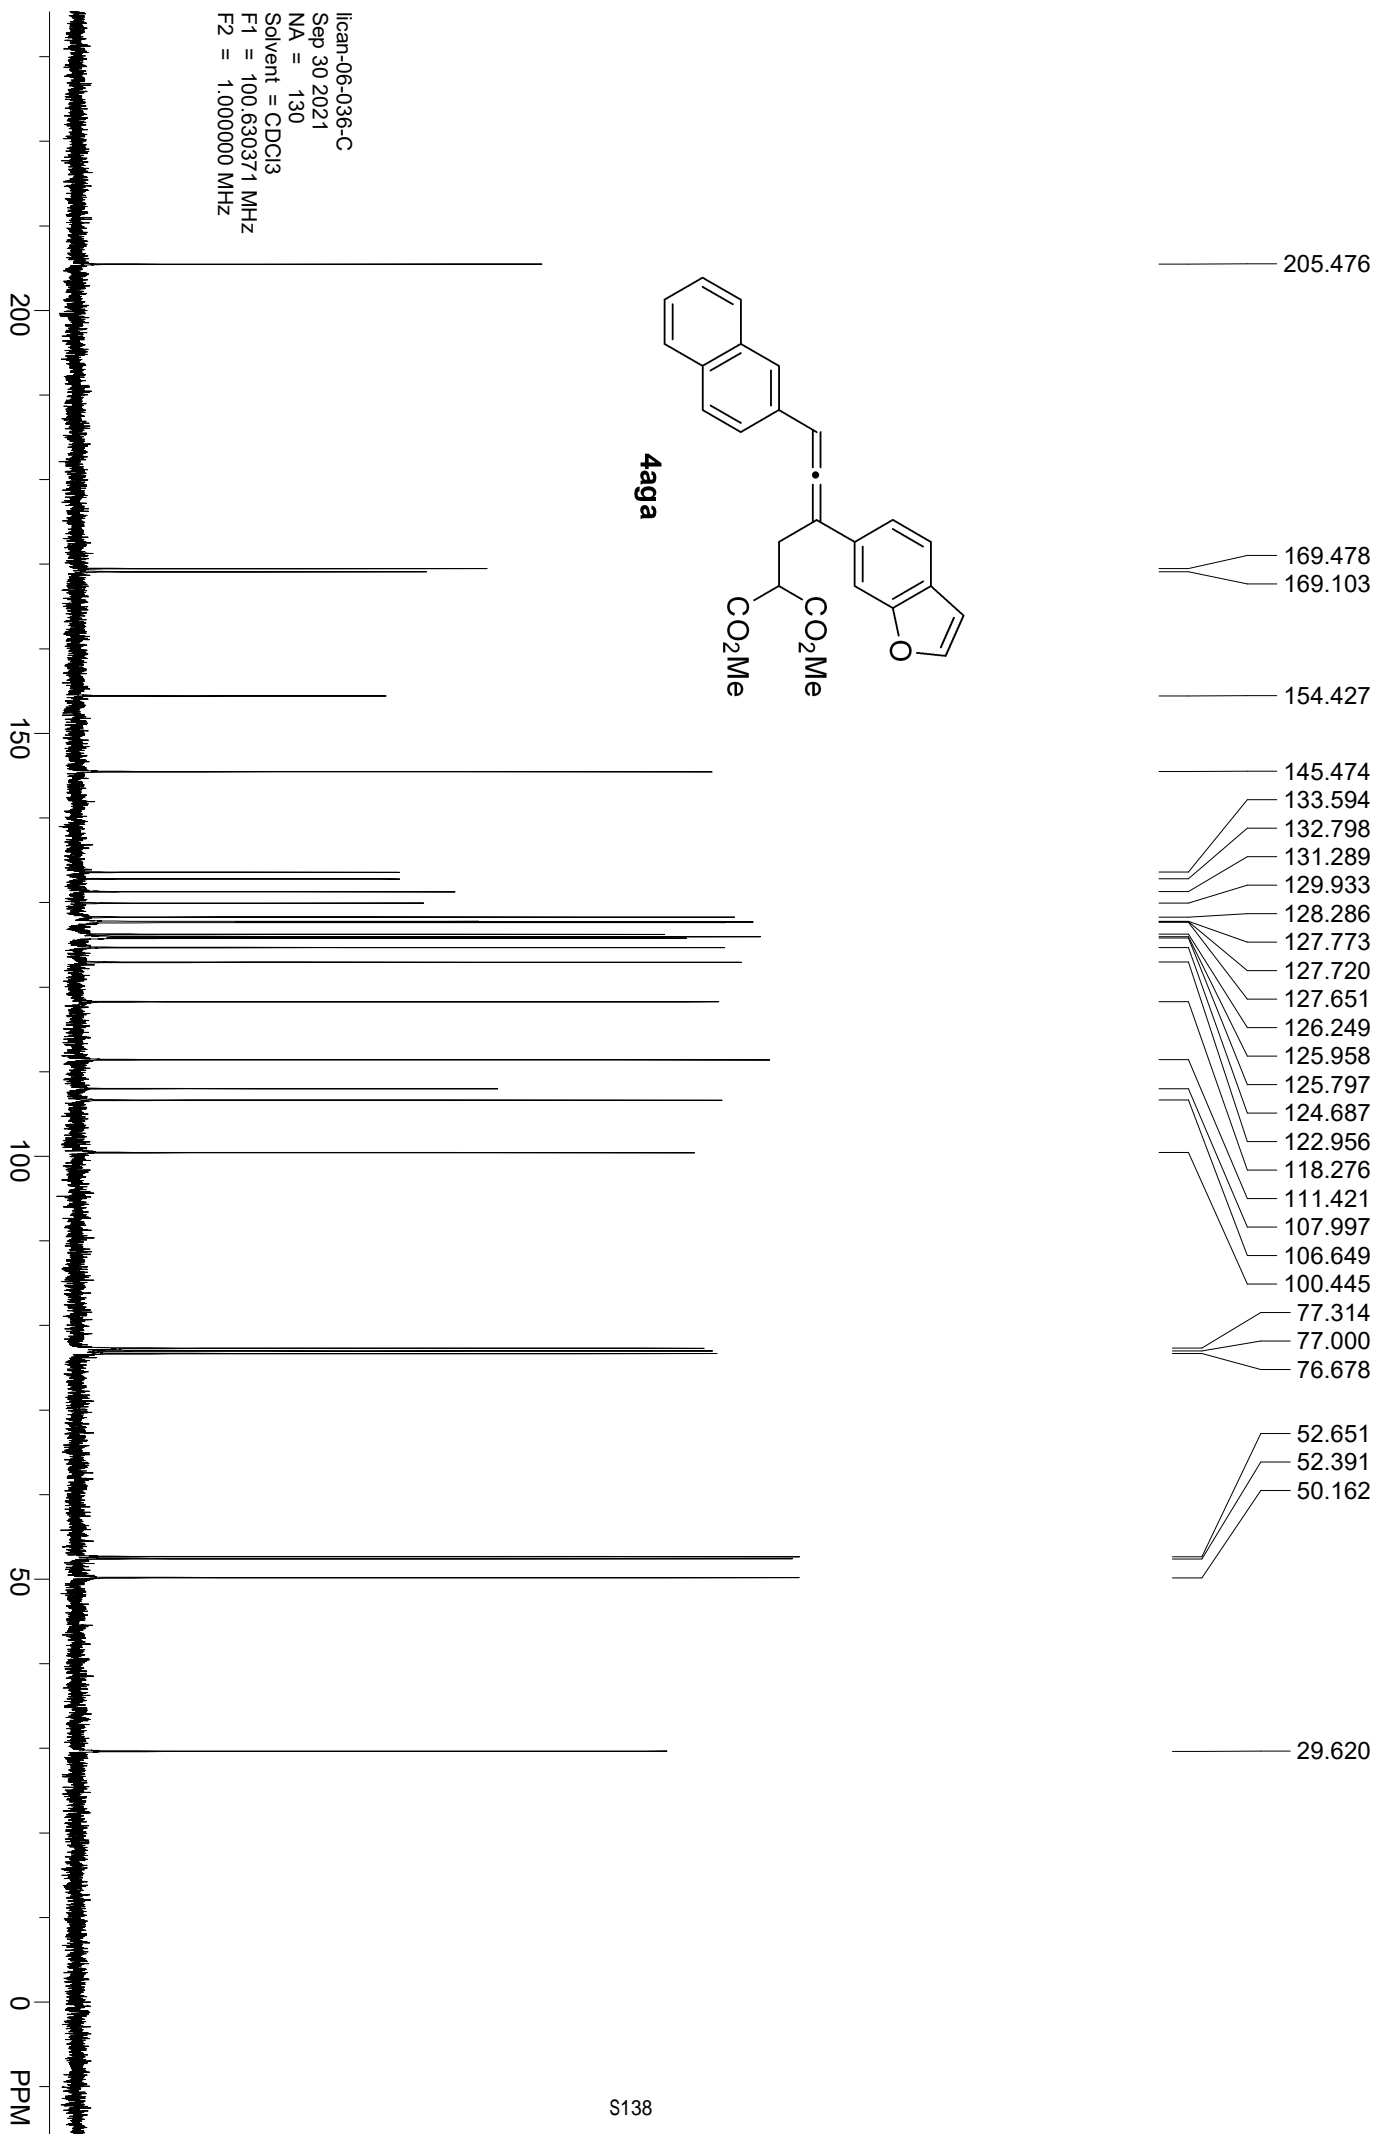

zzn-1-089-H  
Oct 27 2021  
NA = 8  
Solvent = CDCl3  
F1 = 399.717865 MHz  
F2 = 100.517960 MHz

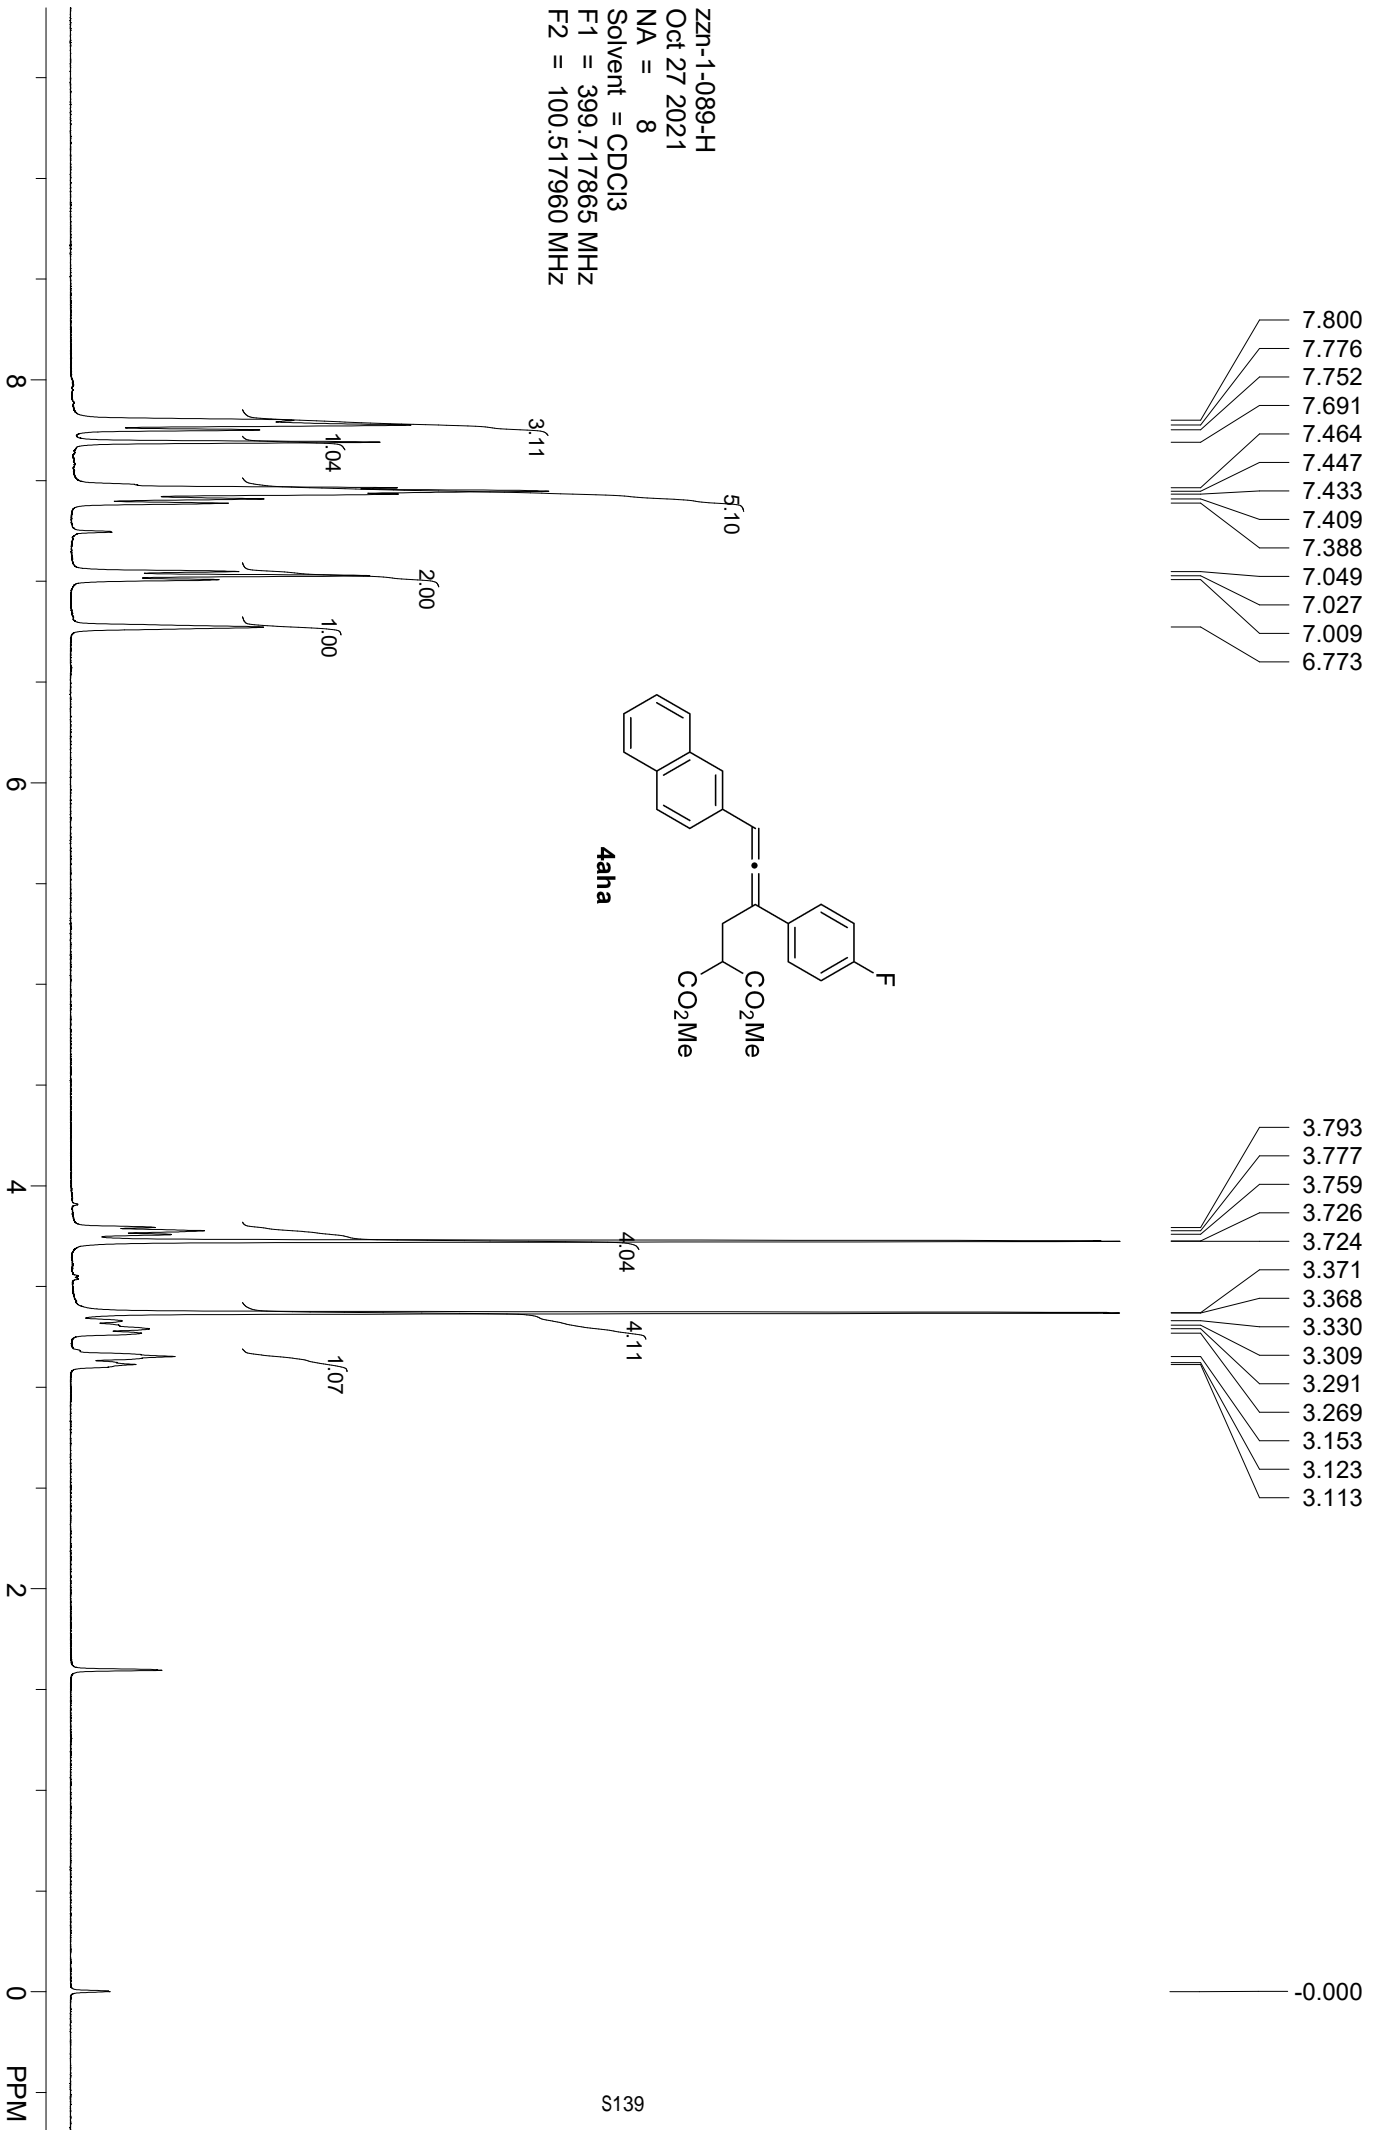

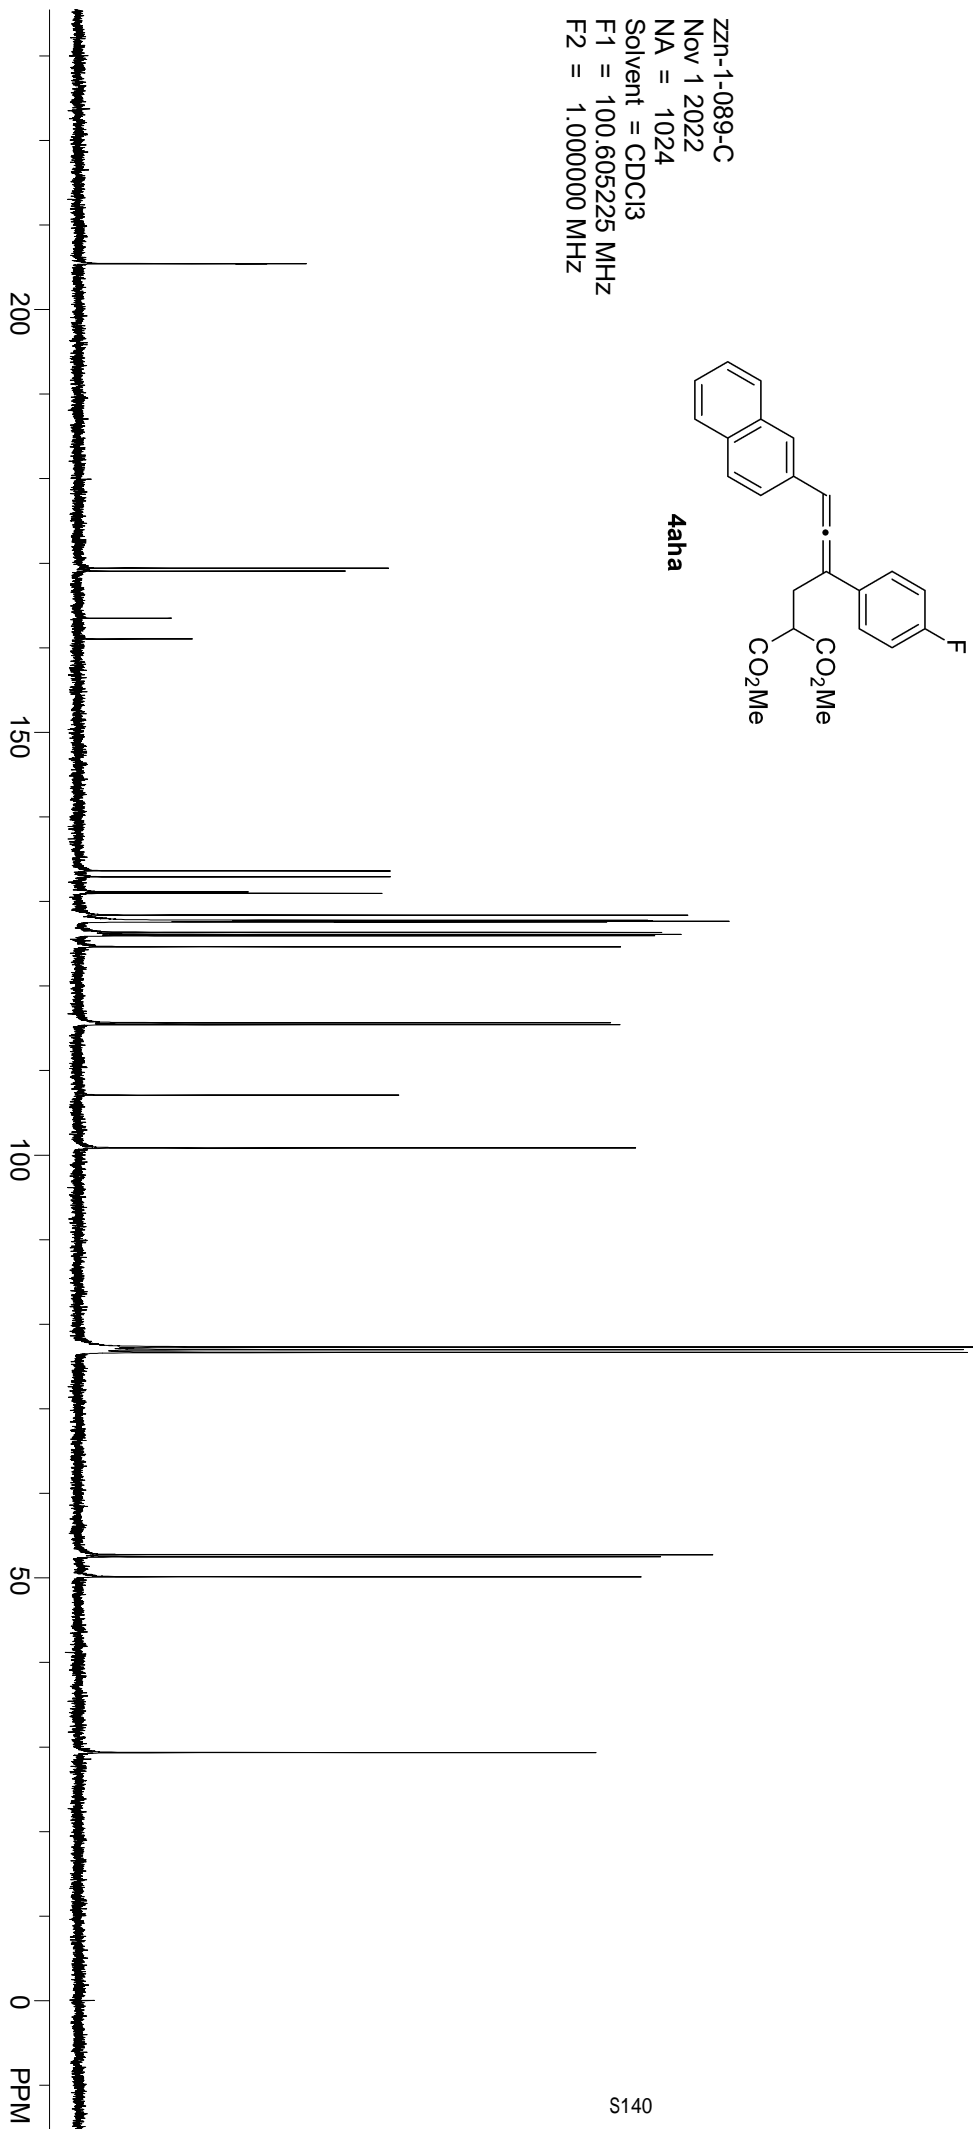

205.424  
205.409

169.417  
169.072  
163.502  
161.043

133.624  
132.911  
131.164  
131.134  
130.973  
128.391  
127.786  
127.717  
127.663  
127.587  
126.353  
126.116  
125.947  
124.637  
115.651  
115.436  
107.108  
100.857  
77.322  
77.000  
76.686

52.729  
52.477  
50.117

29.309

zzn-1-089-F  
Nov 1 2021  
NA = 4  
Solvent = CDCl3  
F1 = 376.406921 MHz  
F2 = 100.596855 MHz

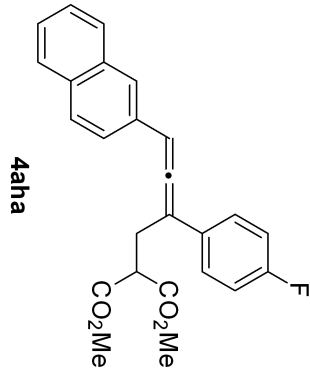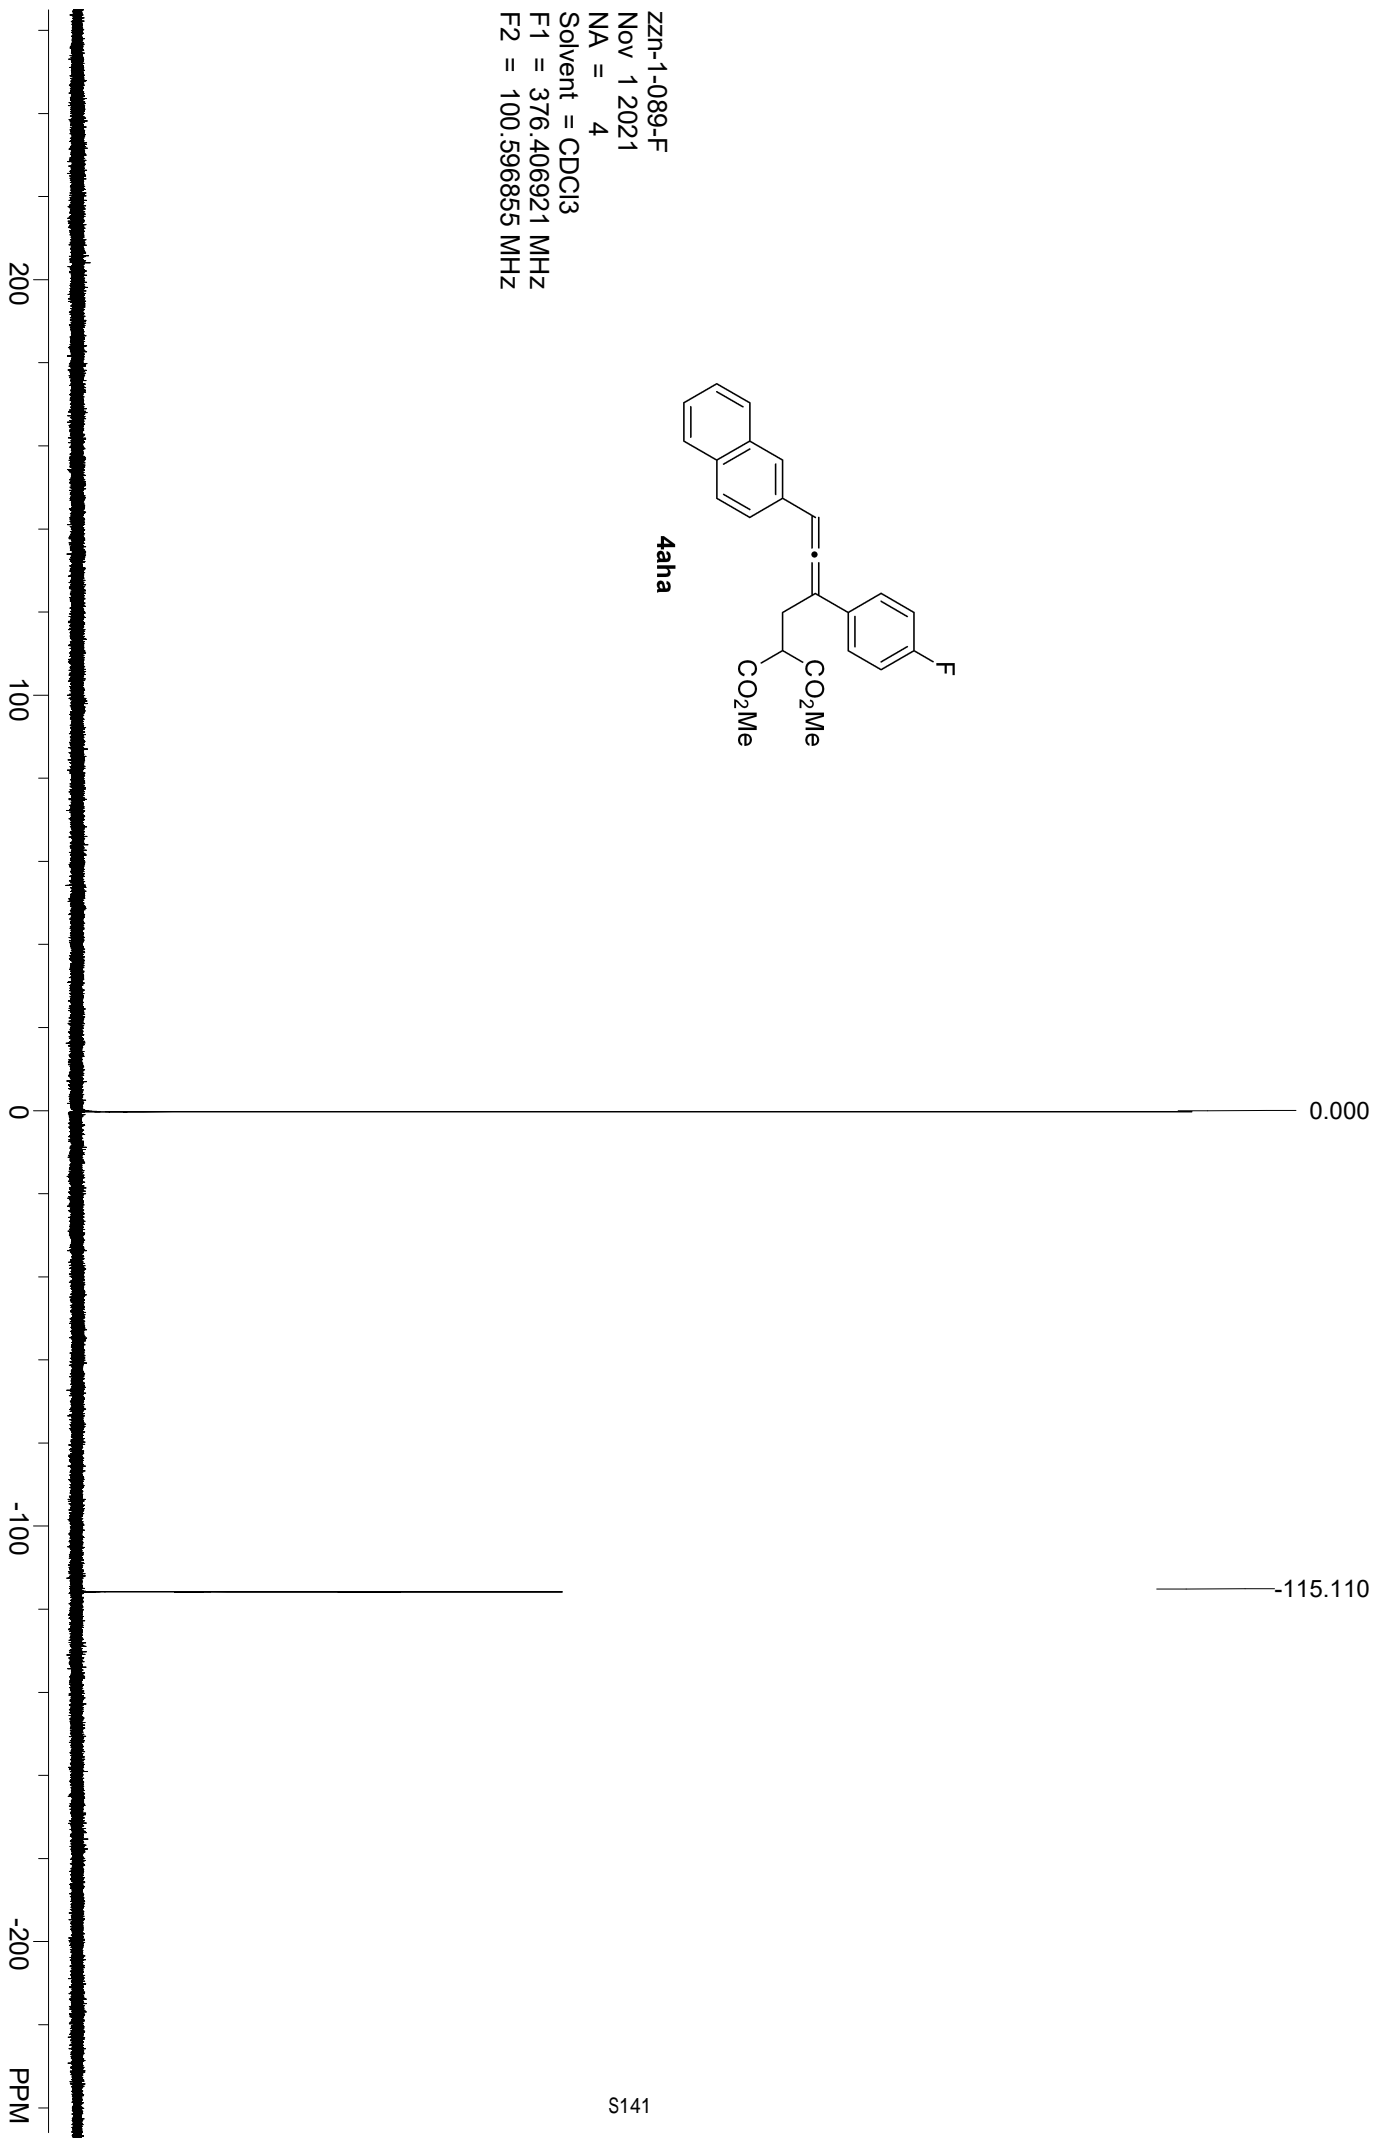

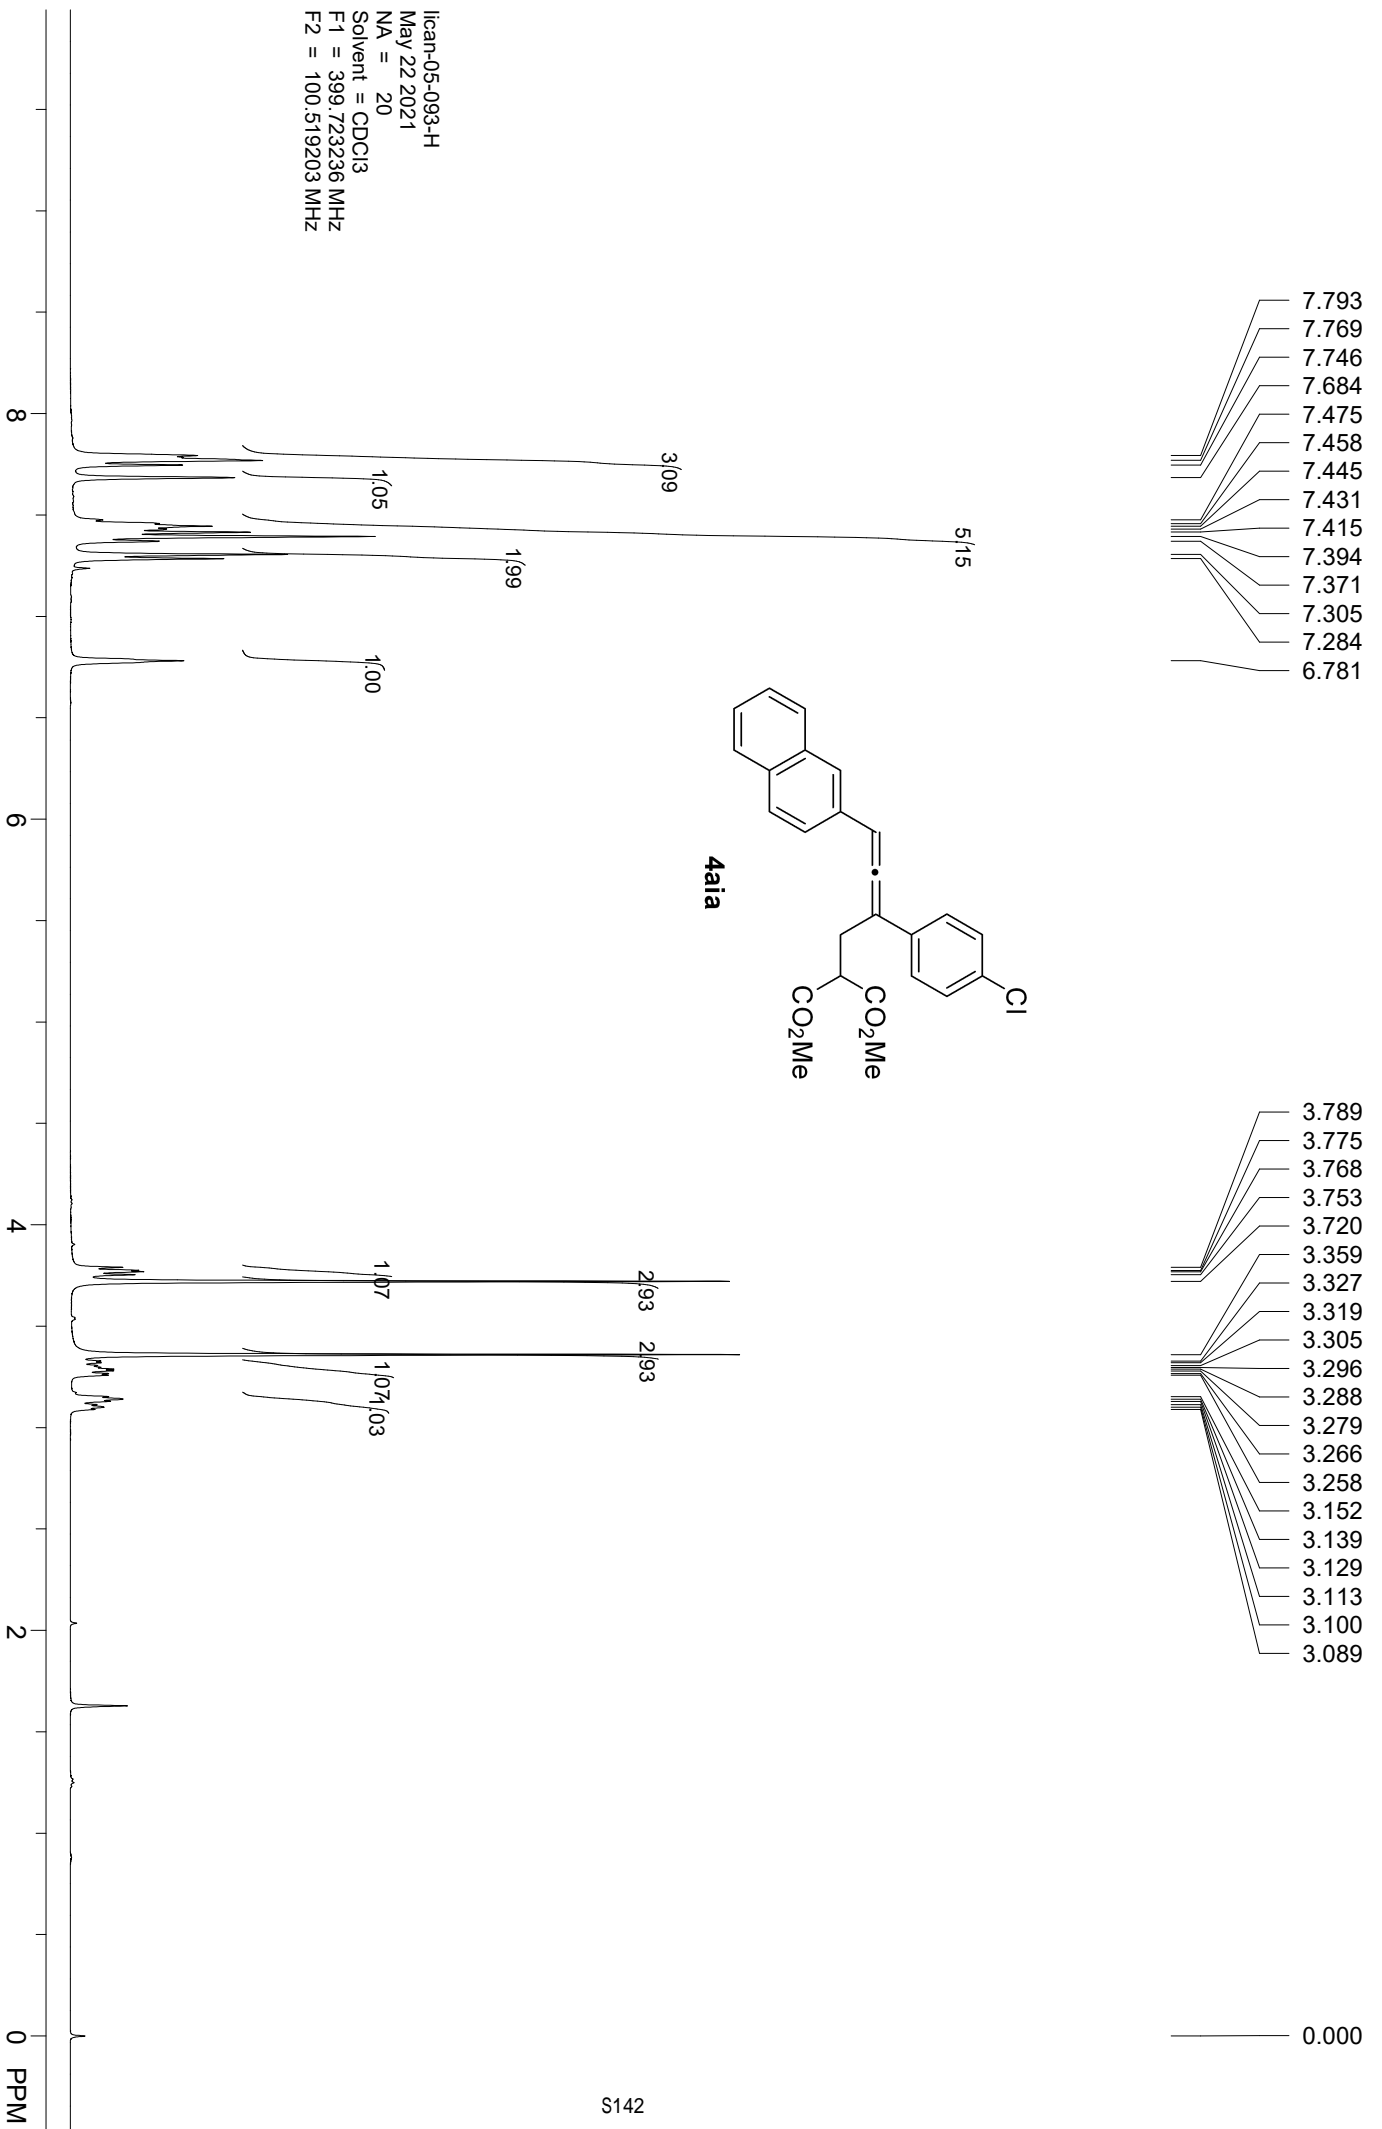

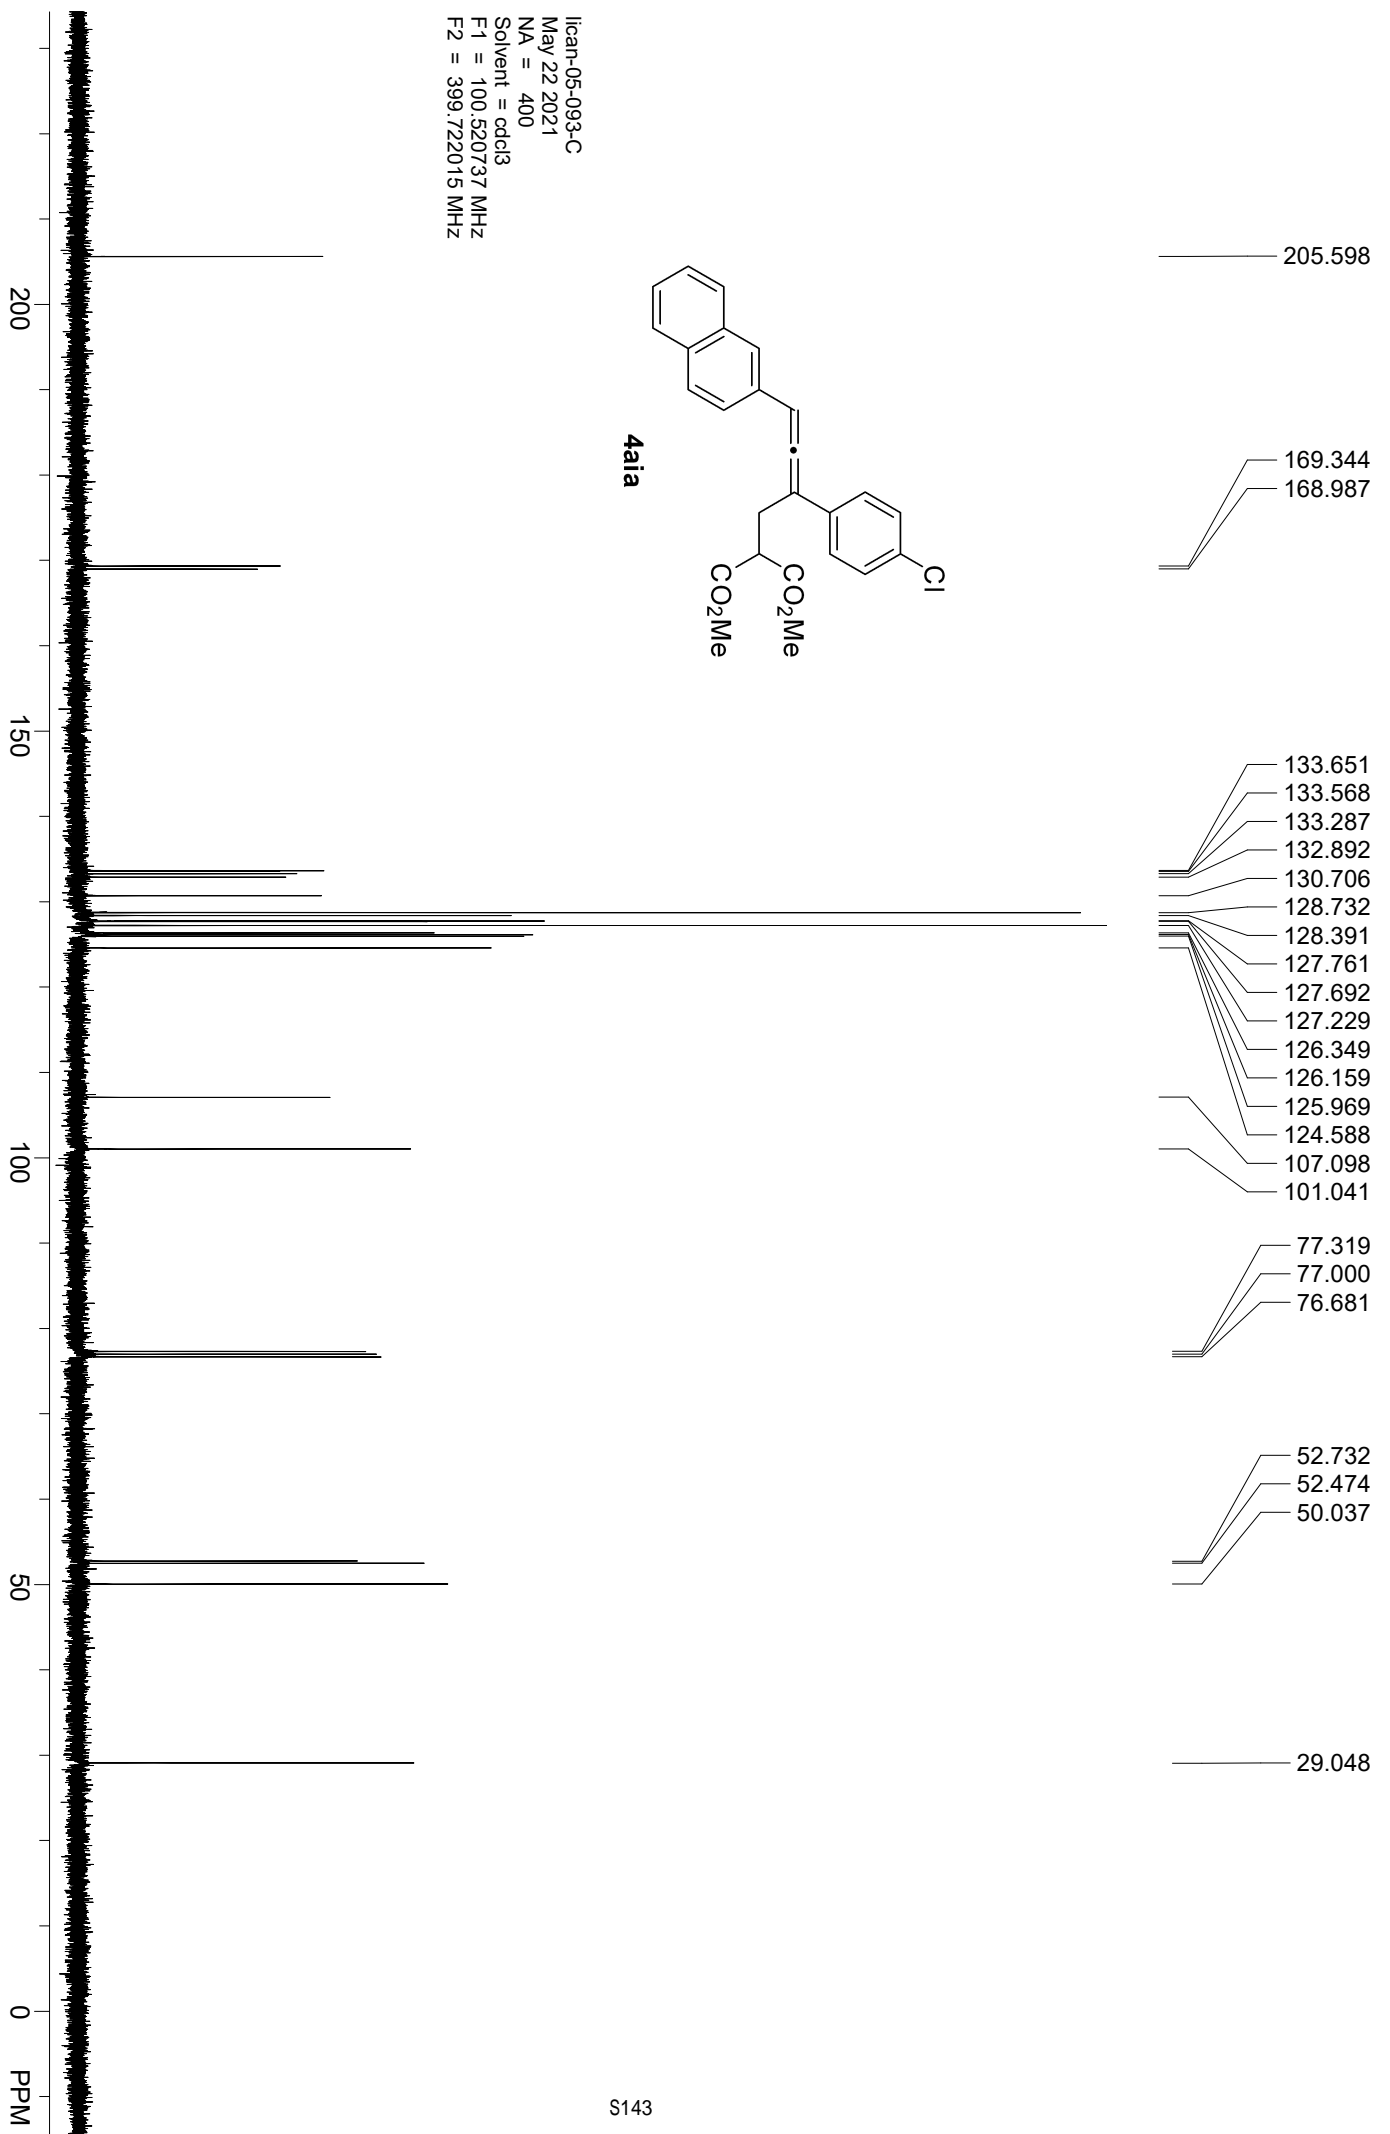

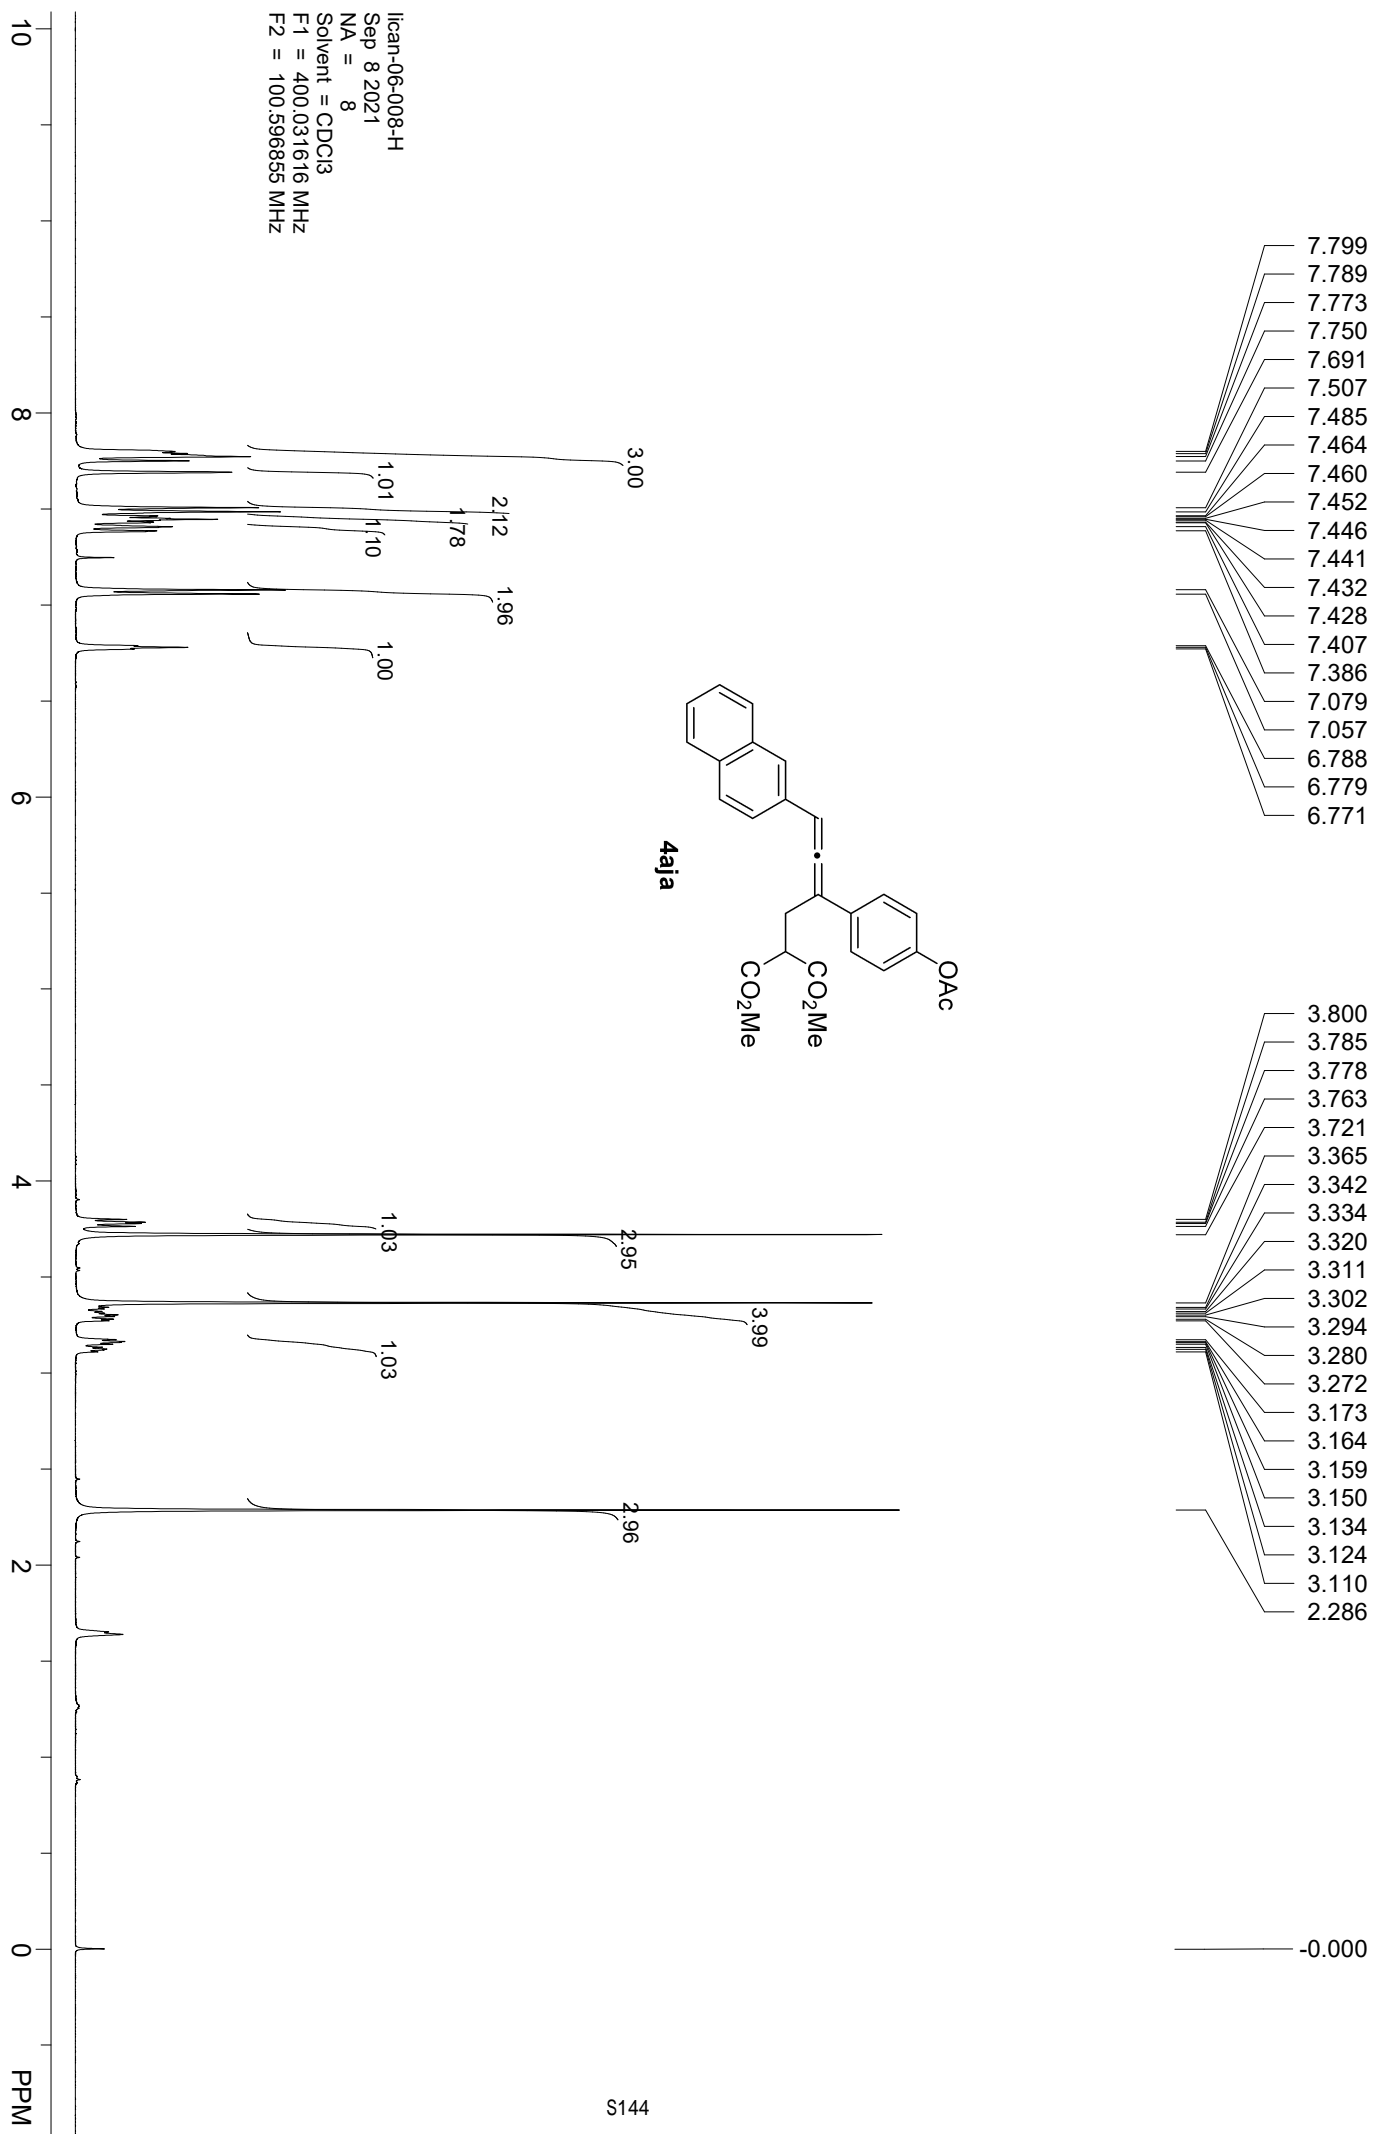



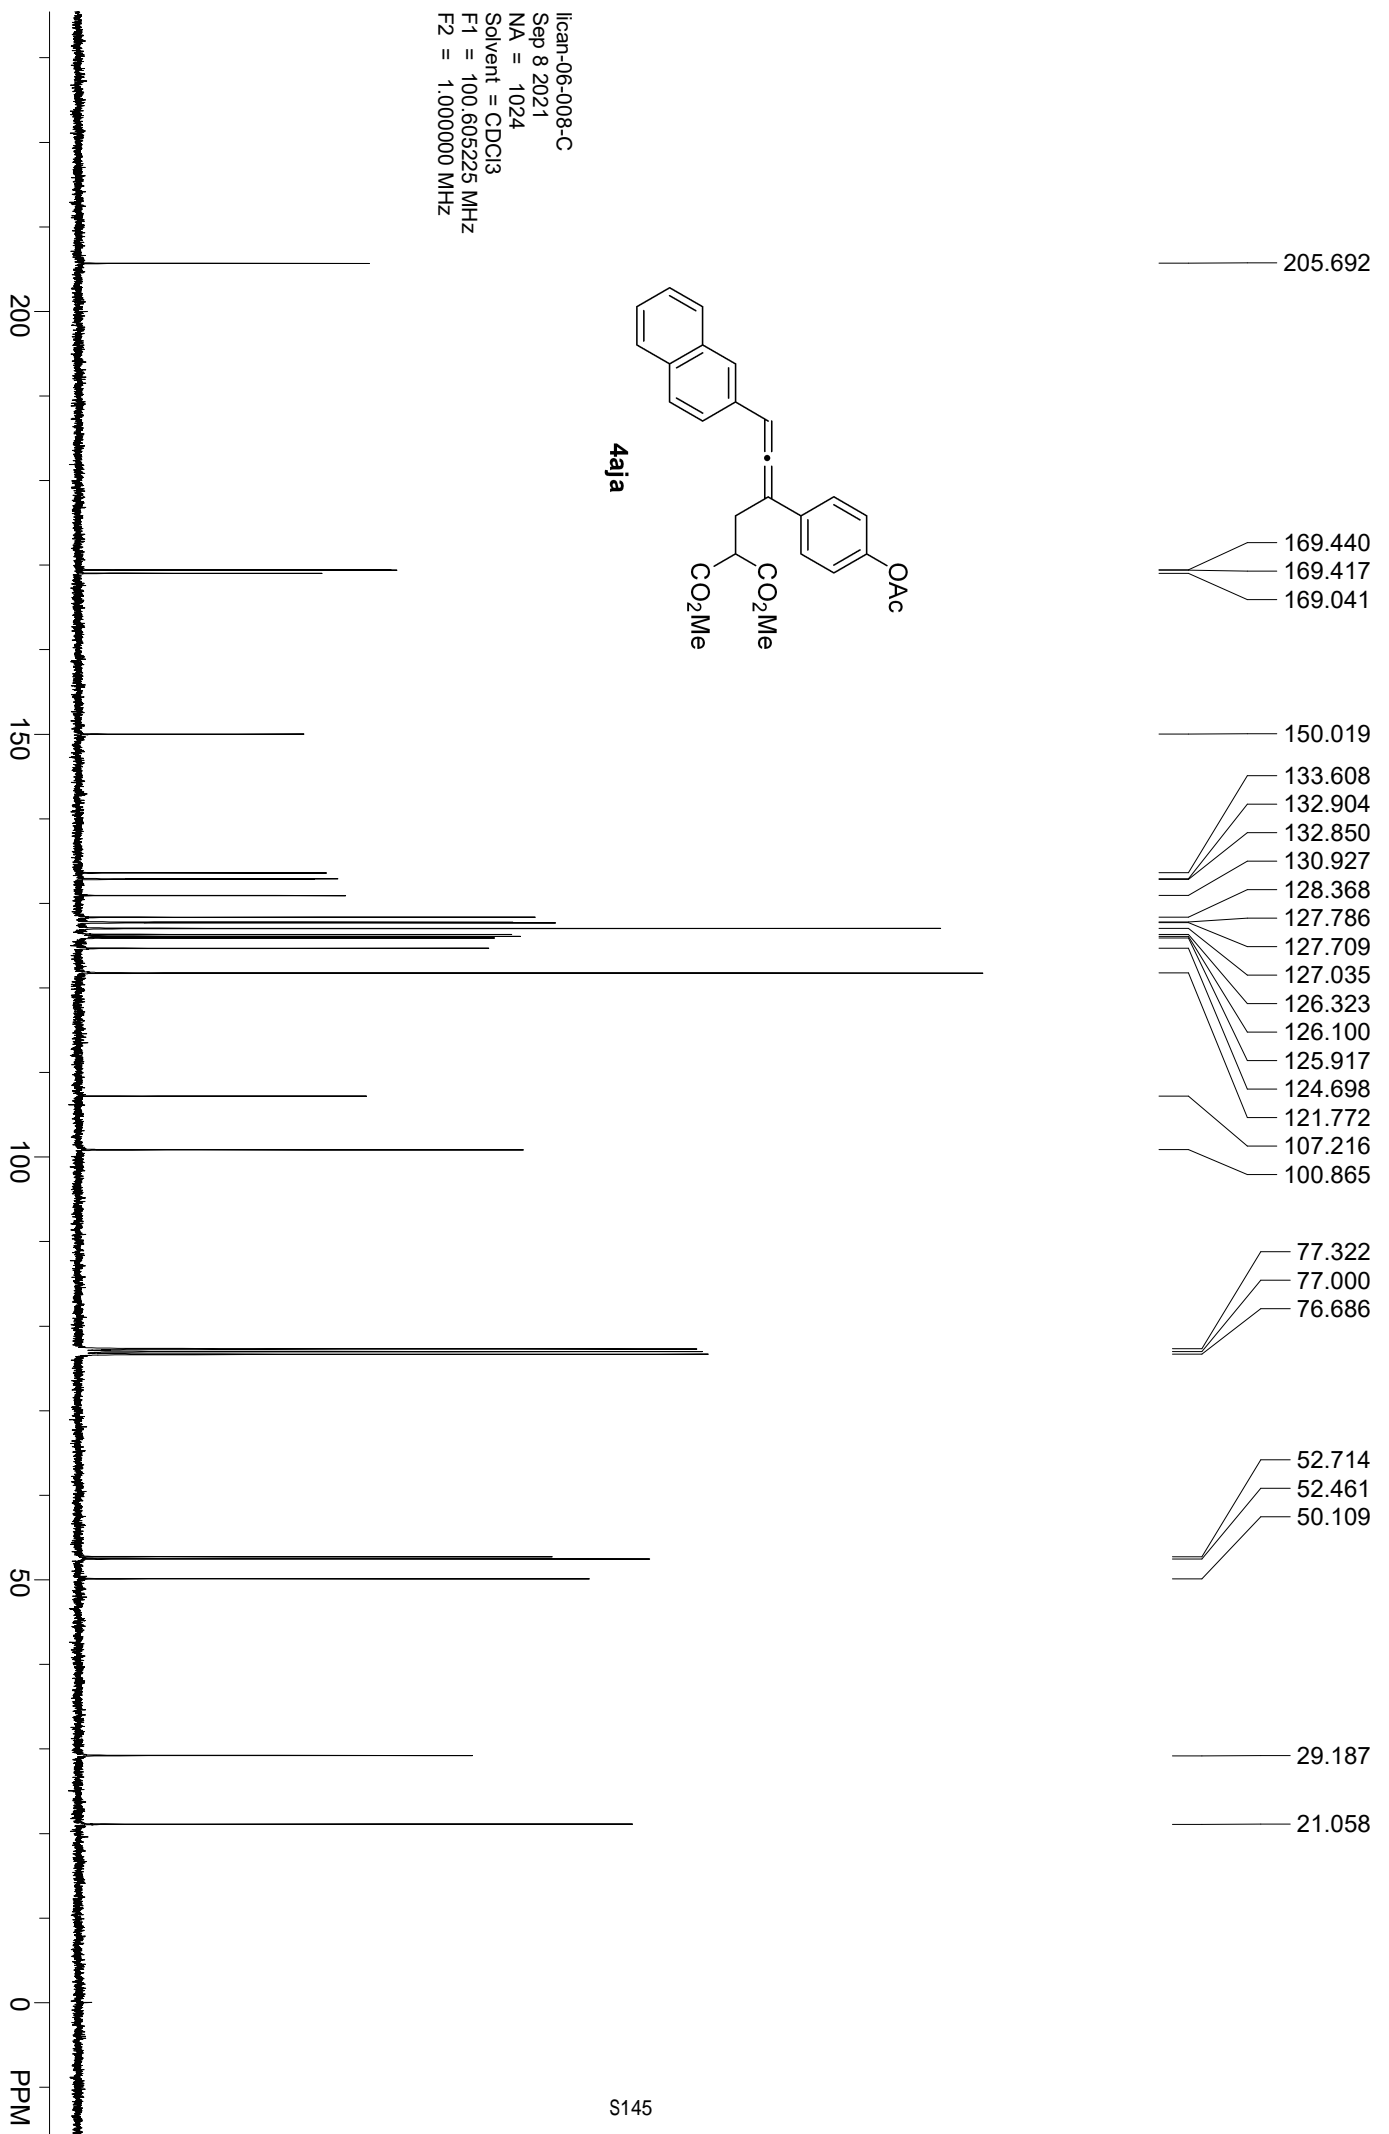

llean-06-035-H  
Sep 23 2021  
NA = 8  
Solvent = CDCl3  
F1 = 400.031616 MHz  
F2 = 100.596855 MHz

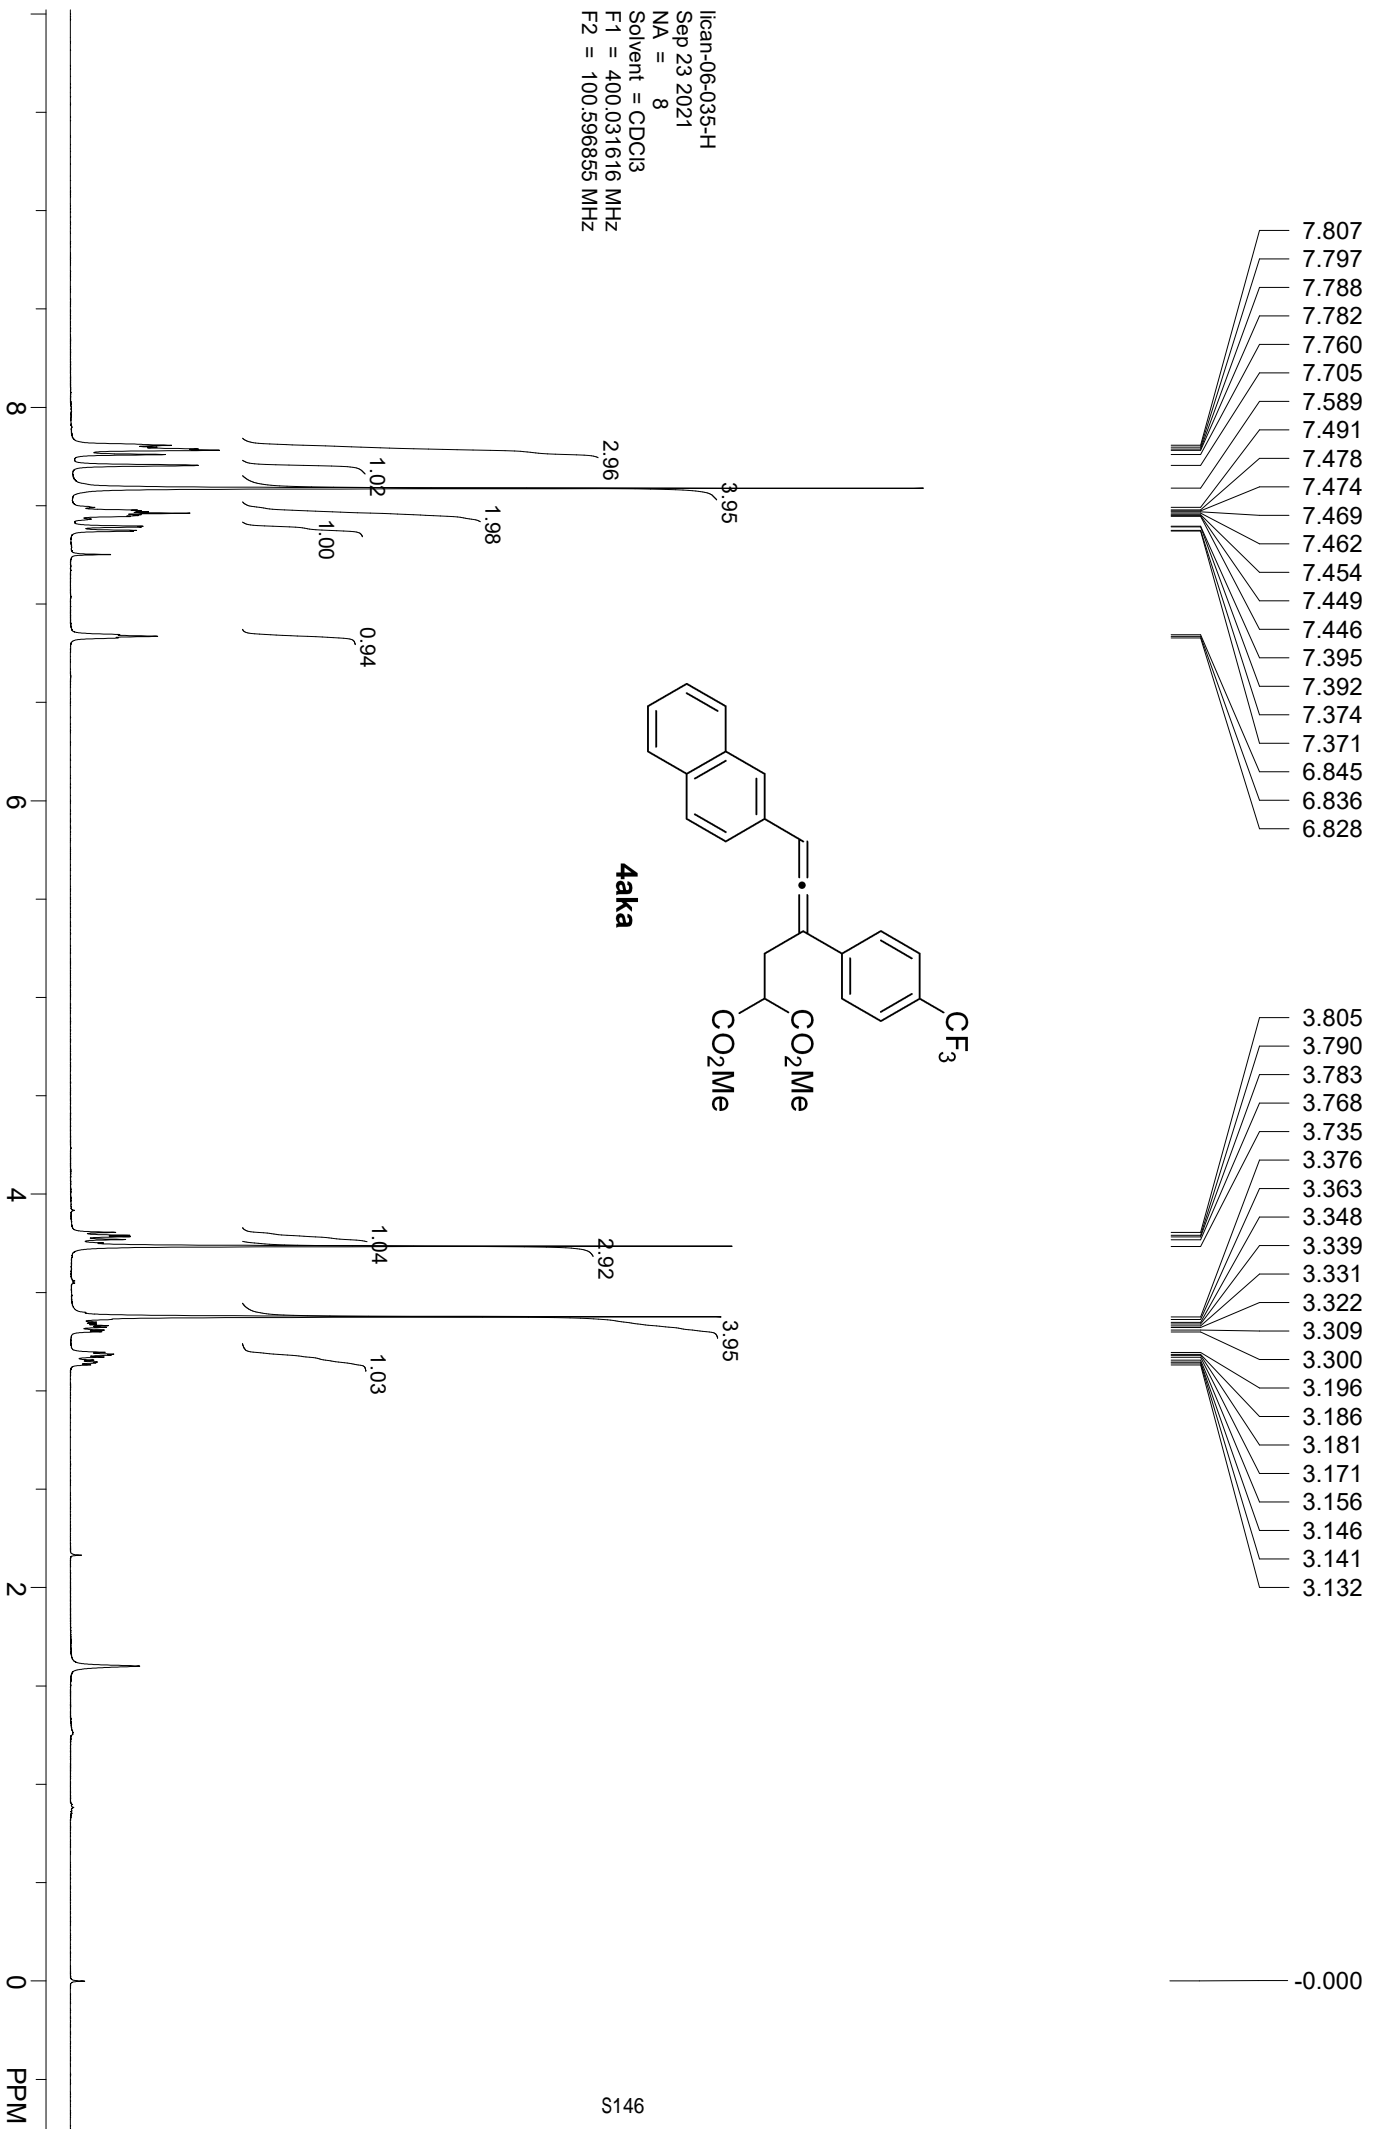

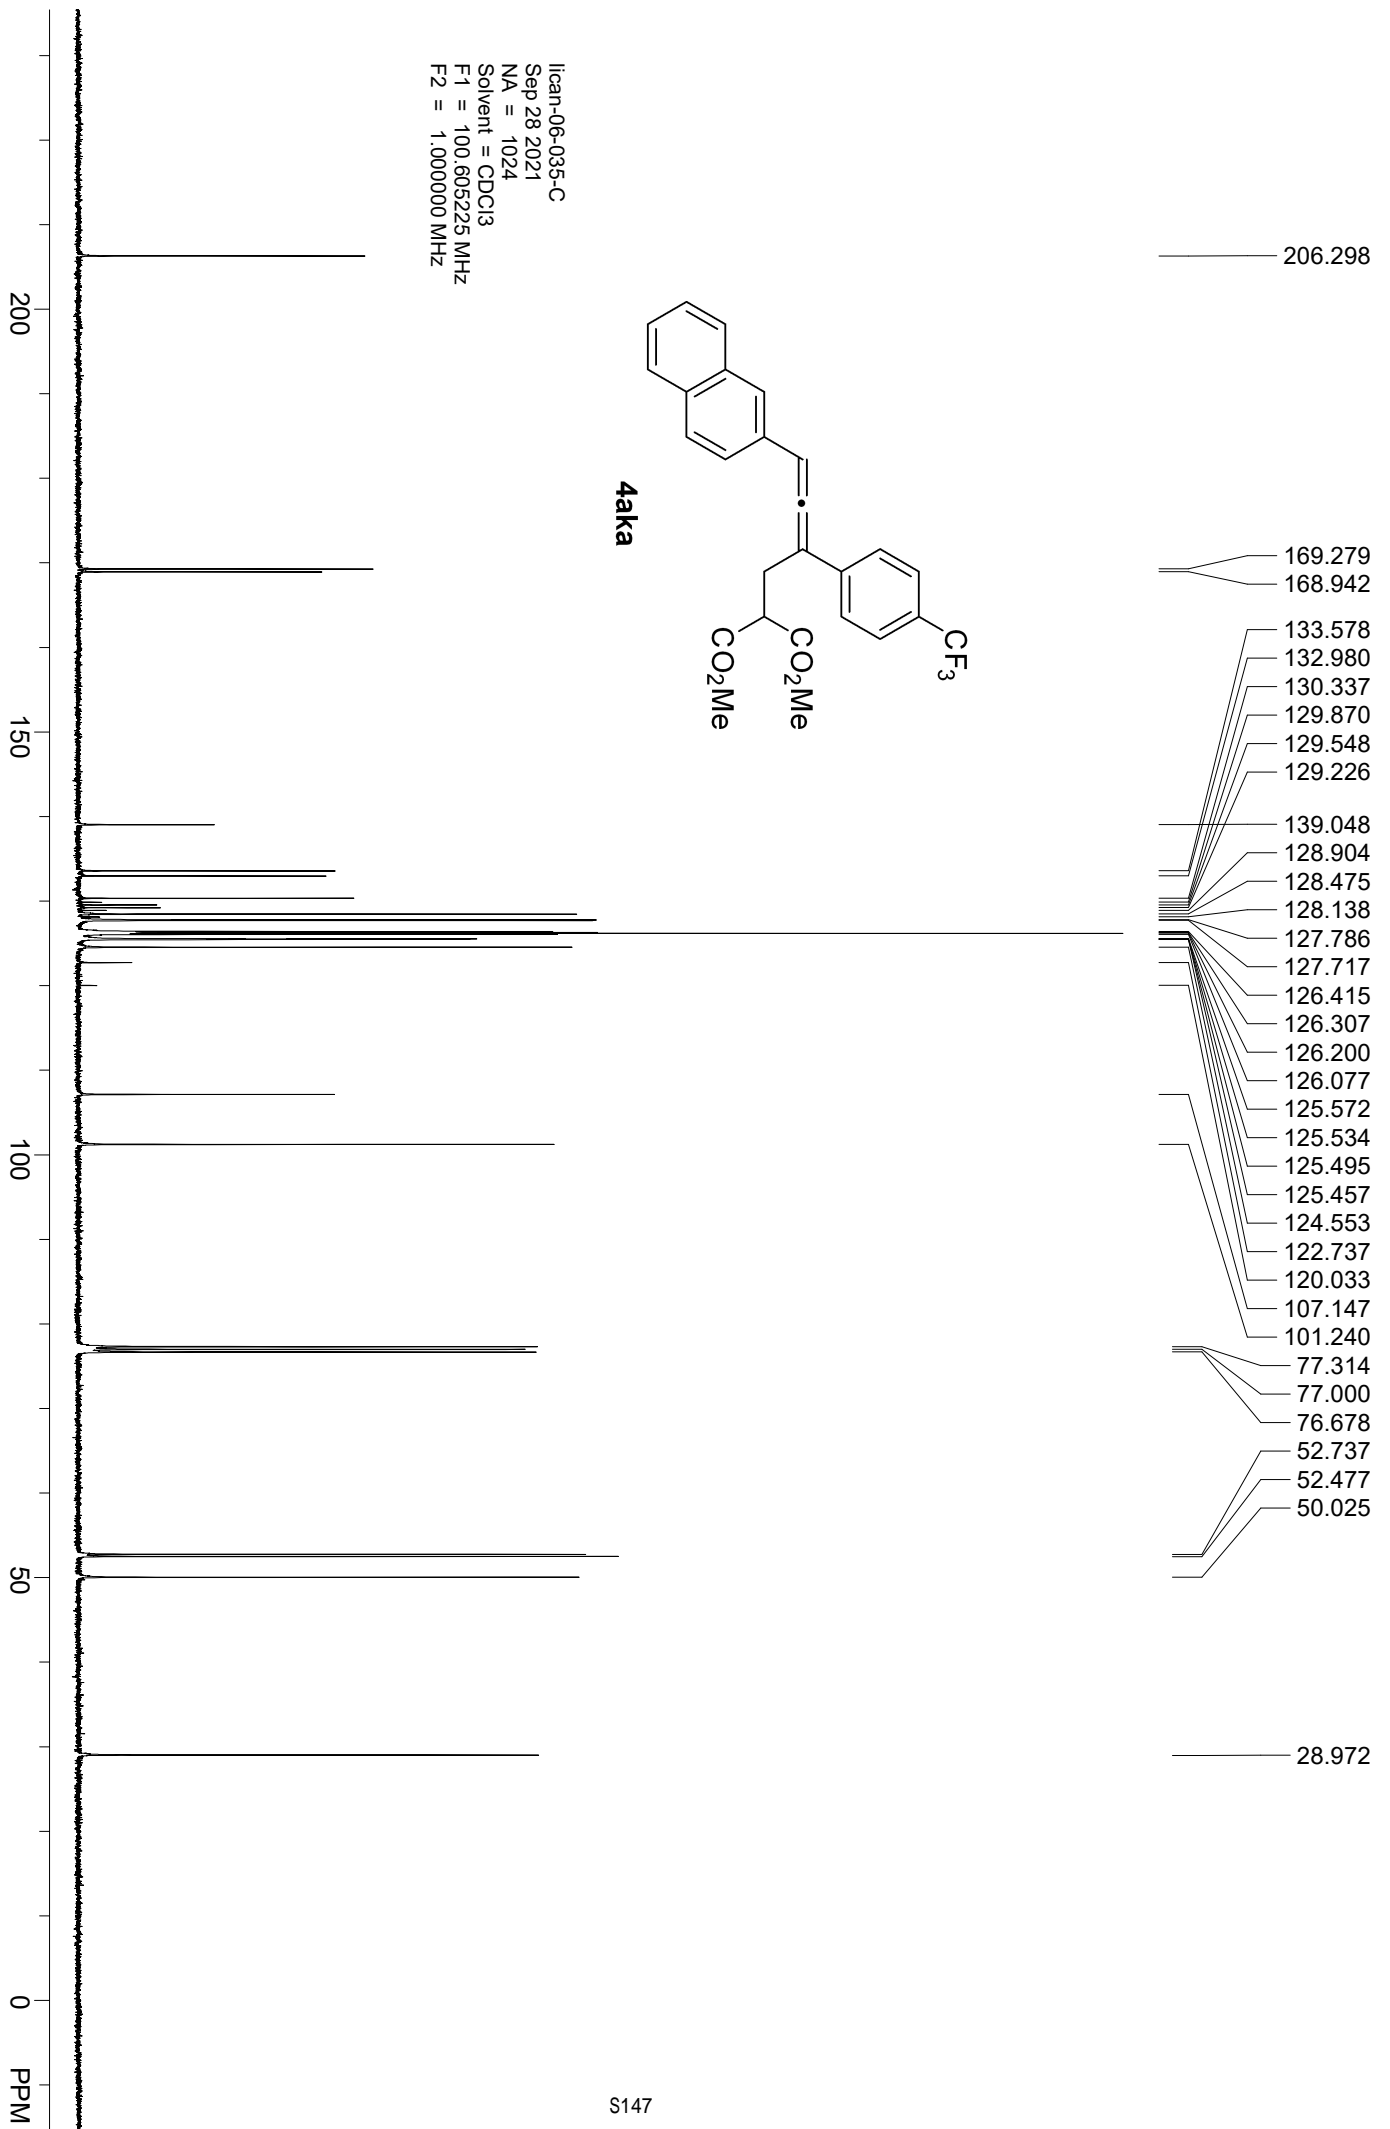

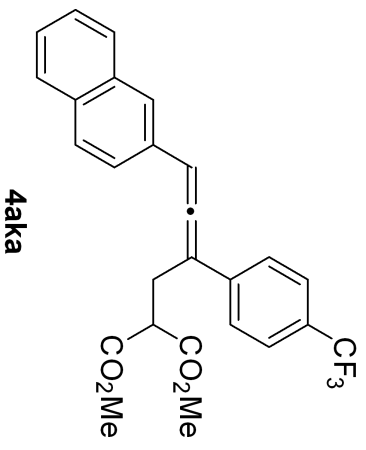

lican-06-035-F  
Sep 23 2021  
NA = 4  
Solvent = CDCl3  
F1 = 376.114410 MHz  
F2 = 399.717072 MHz

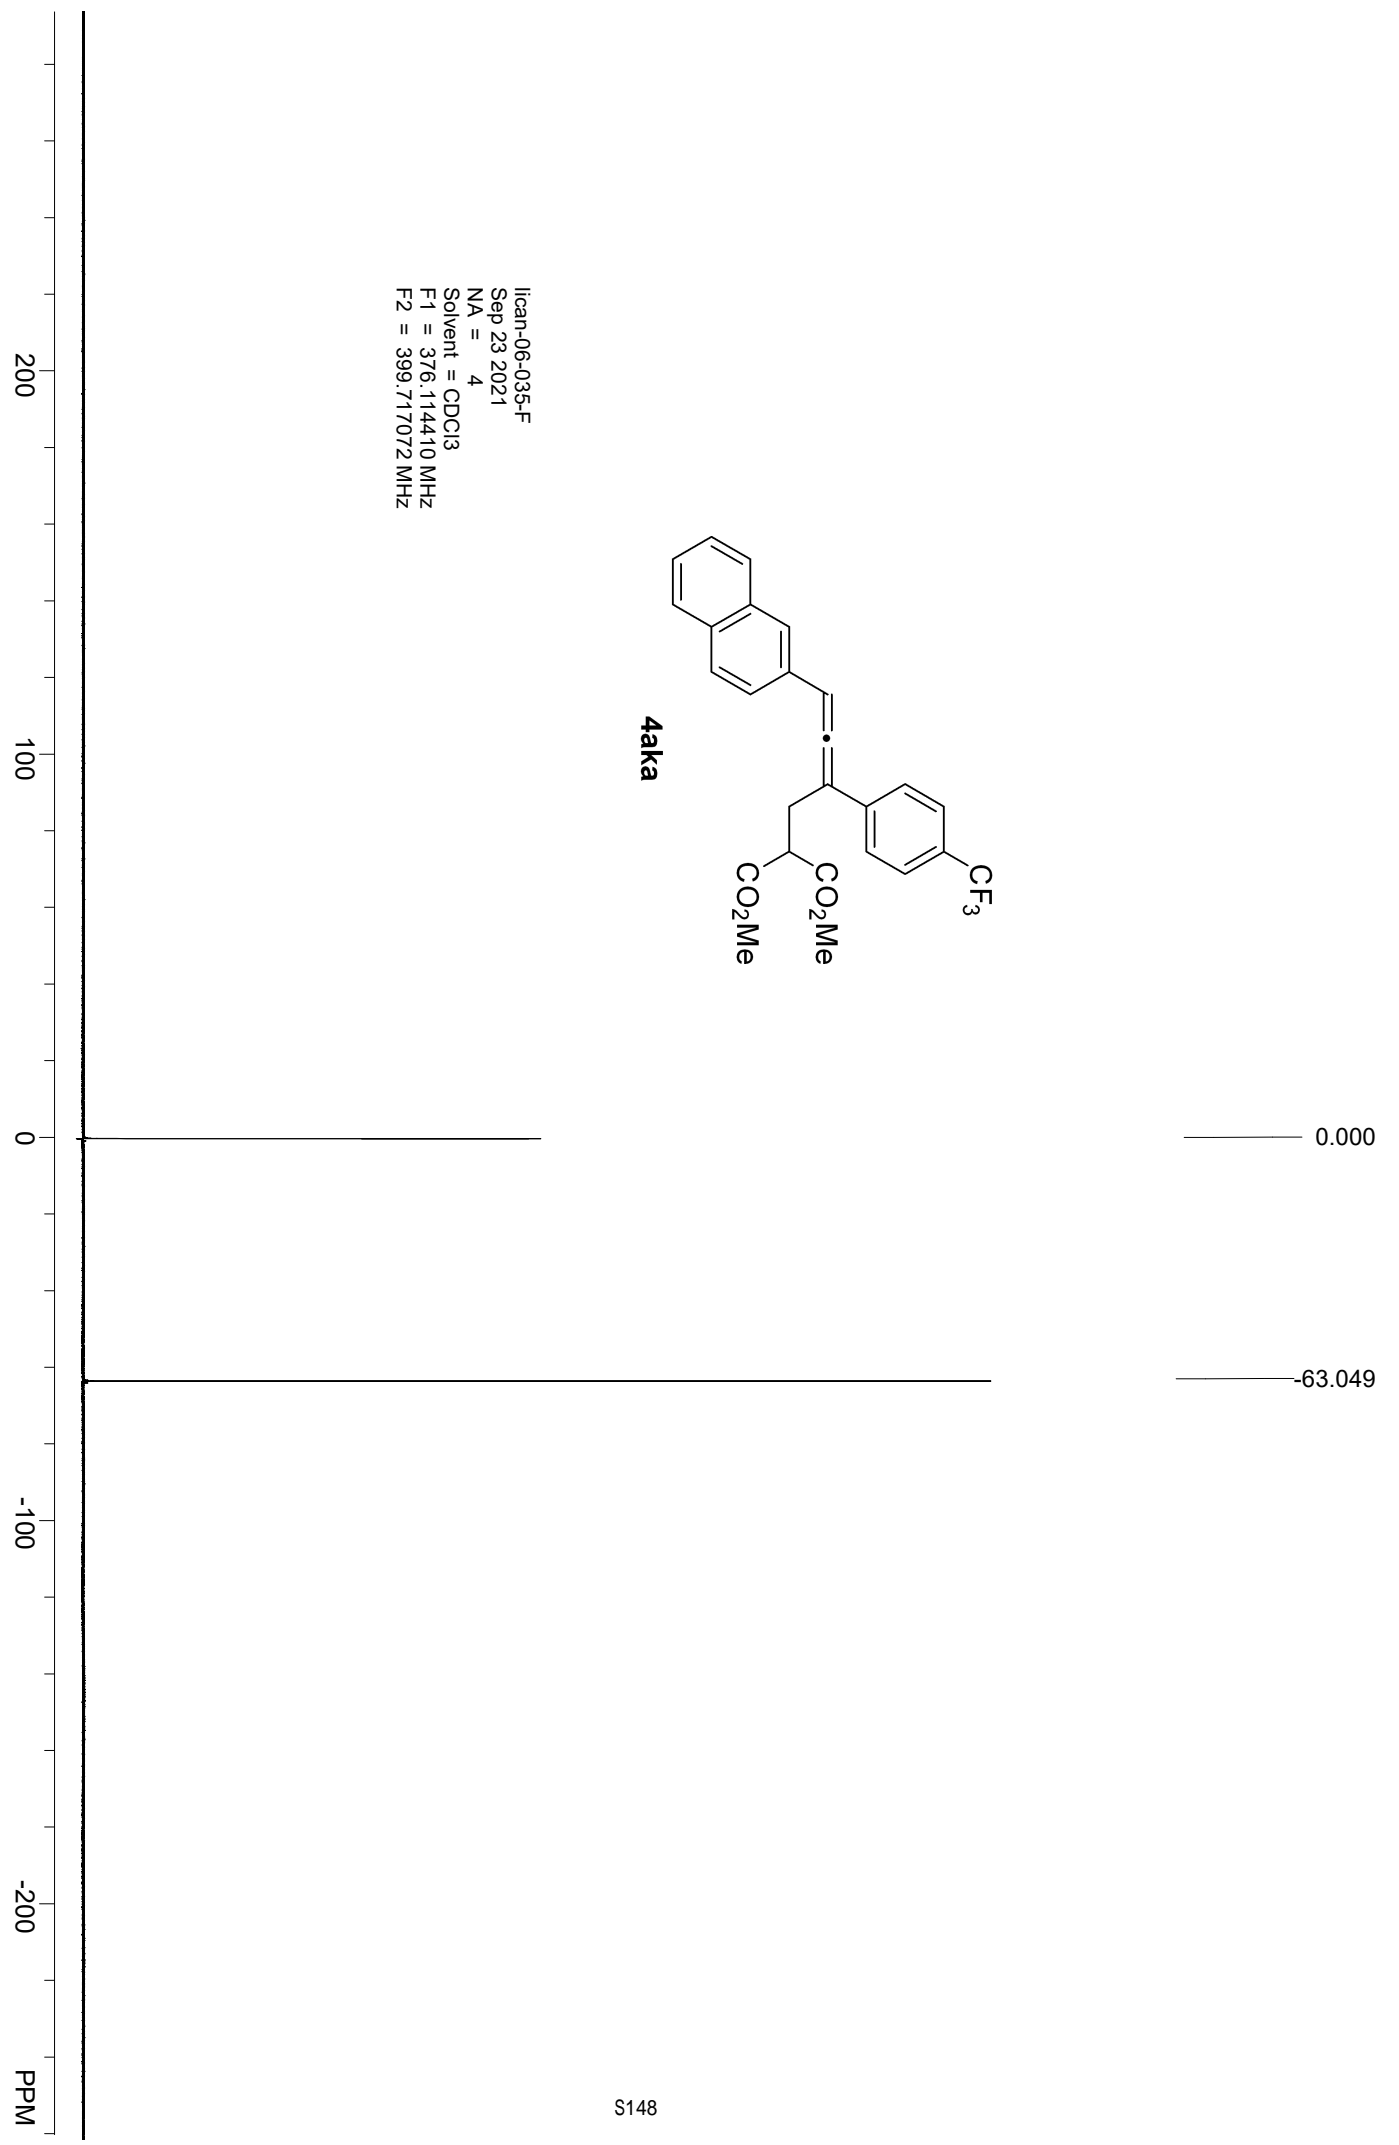

7.778  
7.768  
7.758  
7.751  
7.728  
7.669  
7.455  
7.433  
7.424  
7.410  
7.407  
7.389  
7.368  
7.366  
7.291  
7.271  
7.210  
7.133  
7.113  
6.983  
6.962  
6.761  
6.753  
6.744

3.941  
3.924  
3.906  
3.888  
3.782  
3.768  
3.760  
3.746  
3.696  
3.696  
3.344  
3.324  
3.316  
3.302  
3.294  
3.284  
3.276  
3.262  
3.254  
3.153  
3.143  
3.139  
3.129  
3.113  
3.103  
3.099  
3.089  
2.461  
2.442  
1.899  
1.882  
1.865  
1.848  
1.831  
1.814  
1.797  
1.593  
1.575  
0.900  
0.883  
-0.000

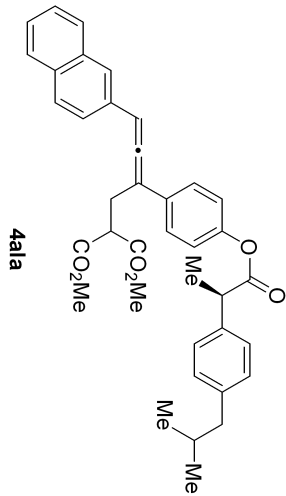

zZn-1-063-H  
Sep 27 2021  
NA = 4  
Solvent = CDCl3  
F1 = 399.717865 MHz  
F2 = 100.517960 MHz

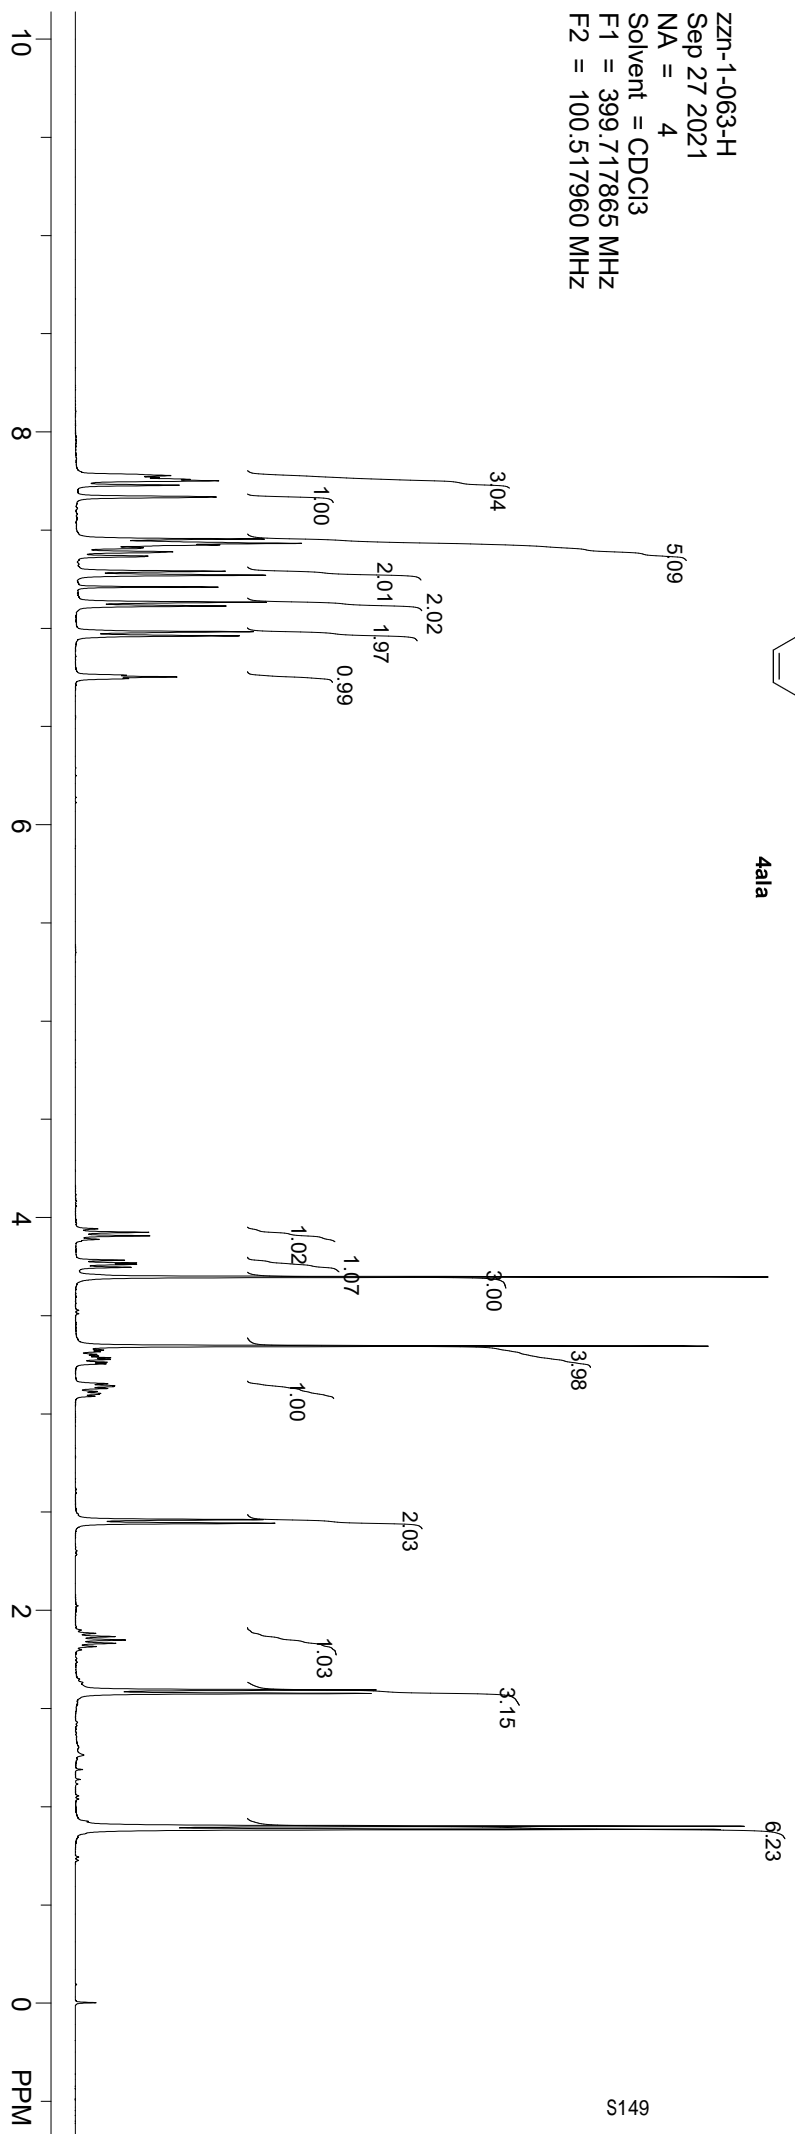

znn-1-063-C  
Sep 28 2021  
NA = 140  
Solvent = cdcl3  
F1 = 100.598389 MHz  
F2 = 400.030792 MHz

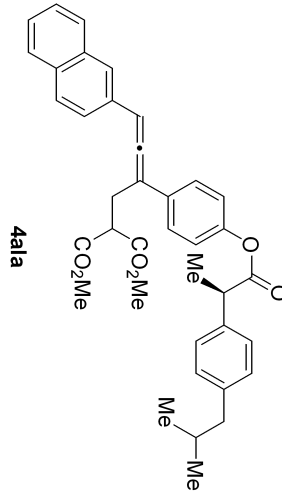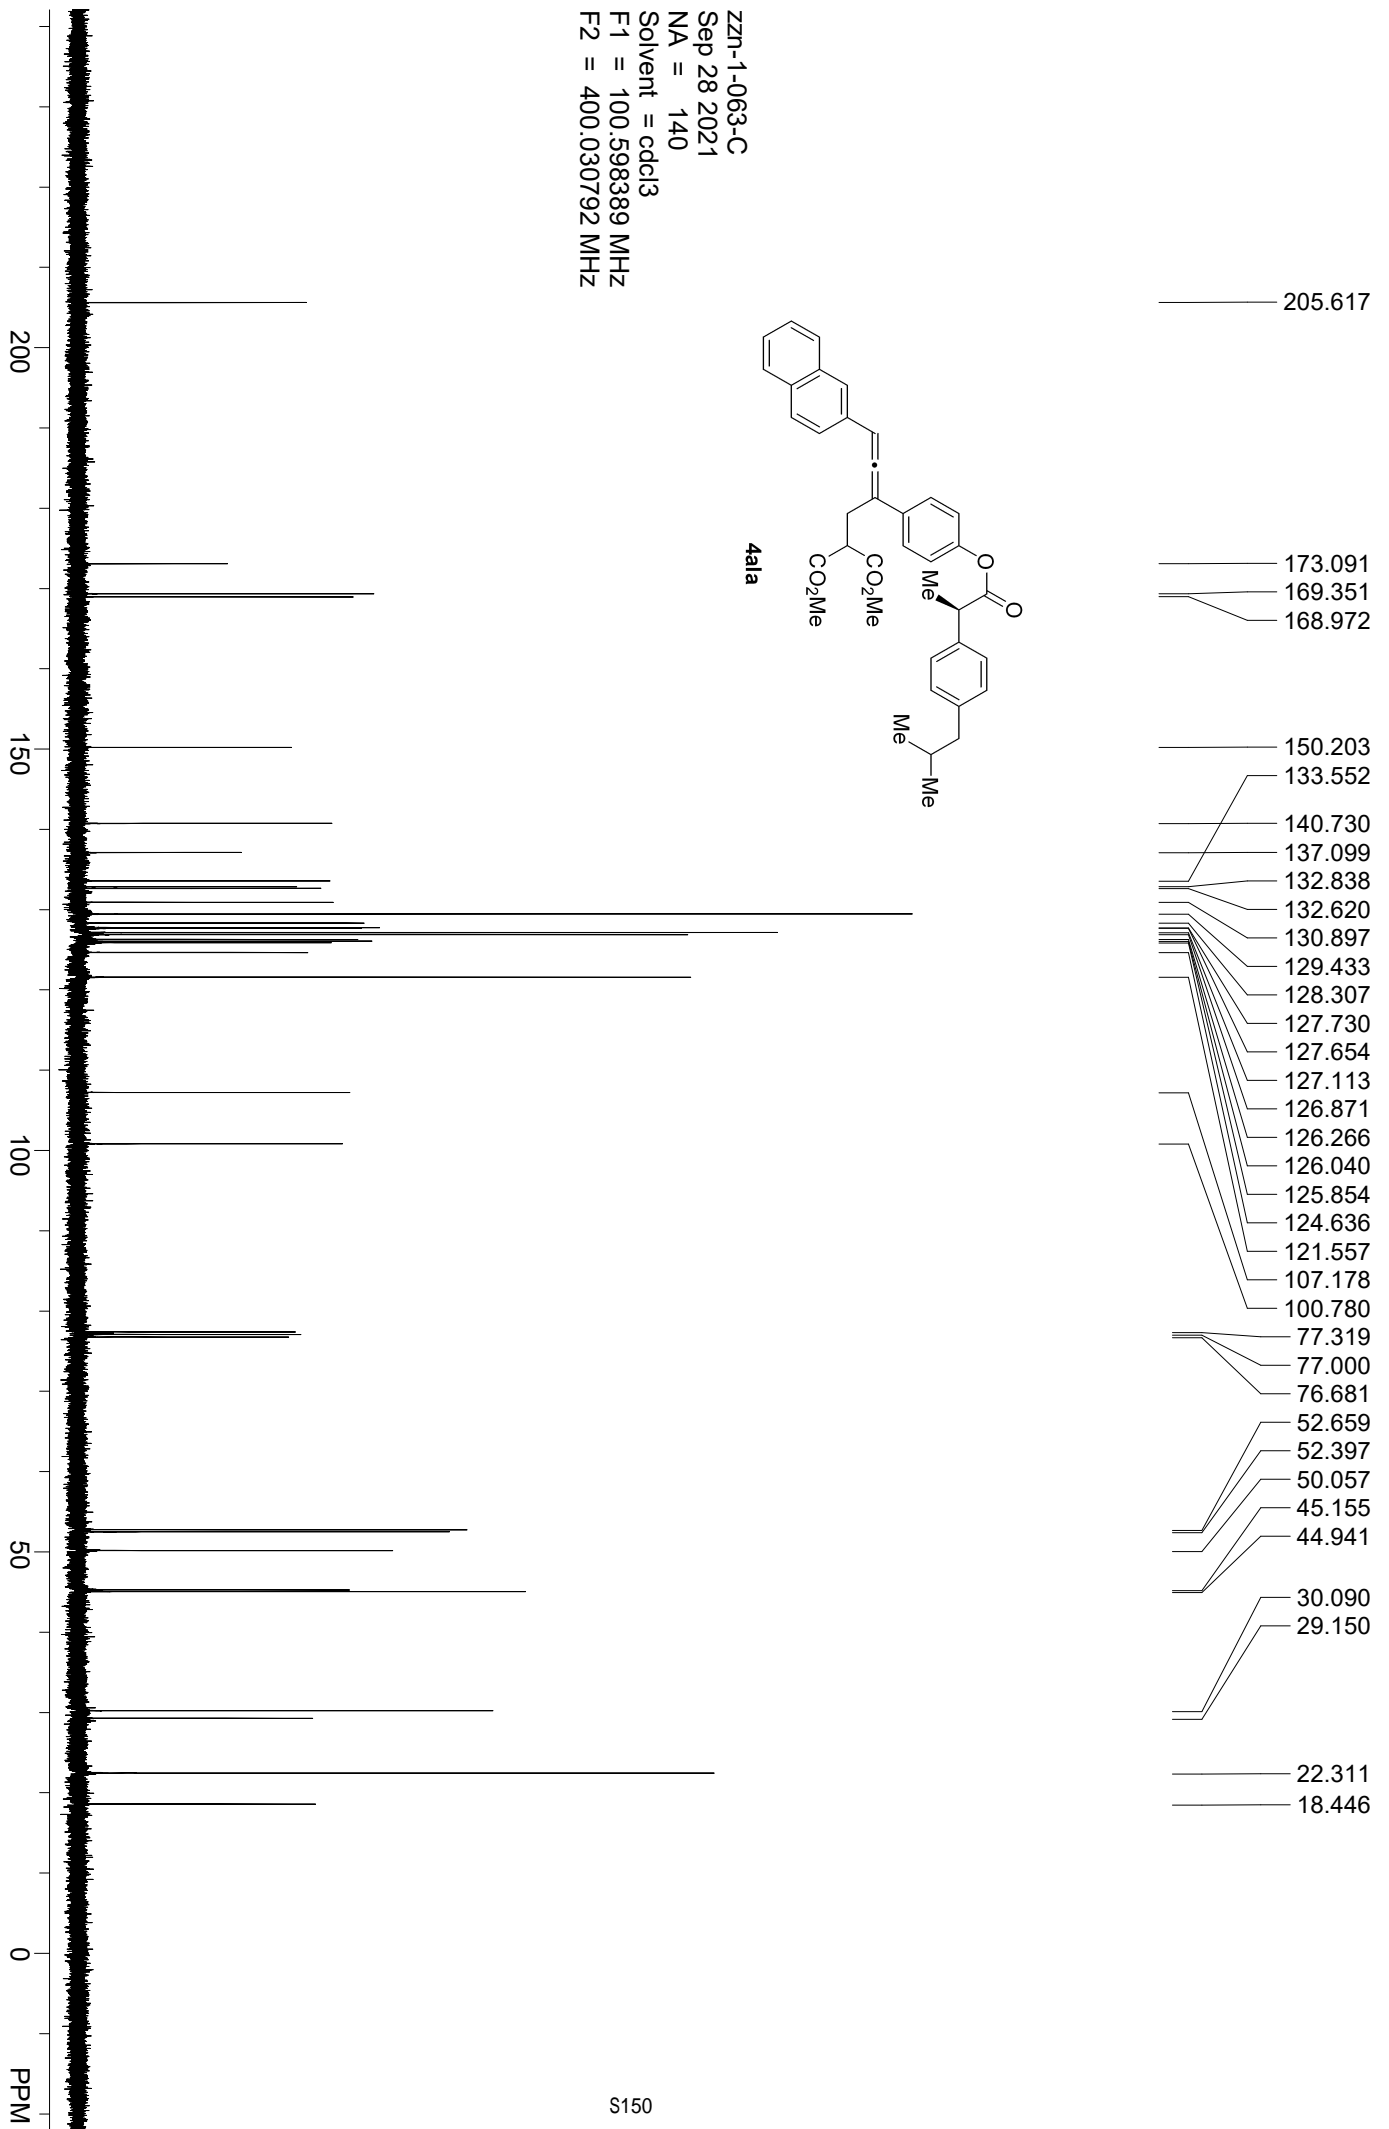

SAMPLE INFORMATION

|                   |                               |                     |                 |
|-------------------|-------------------------------|---------------------|-----------------|
| Sample Name:      | zn-1-063-od-h-80-20-1.0-214-1 | Acquired By:        | System          |
| Sample Type:      | Unknown                       | Sample Set Name:    |                 |
| Vial:             | 1                             | Acq. Method Set:    | HPLC            |
| Injection#:       | 2                             | Processing Method:  | 20181124        |
| Injection Volume: | 5.00 u                        | Chanel Name:        | W2489 ChA       |
| Run Time:         | 20.0 Minutes                  | Proc. Chnl. Descr.: | W2489 ChA.214mm |
| Date Acquired:    | 11/4/2021 1:04:14 AMCST       |                     |                 |
| Date Processed:   | 11/4/2021 1:21:26 AMCST       |                     |                 |

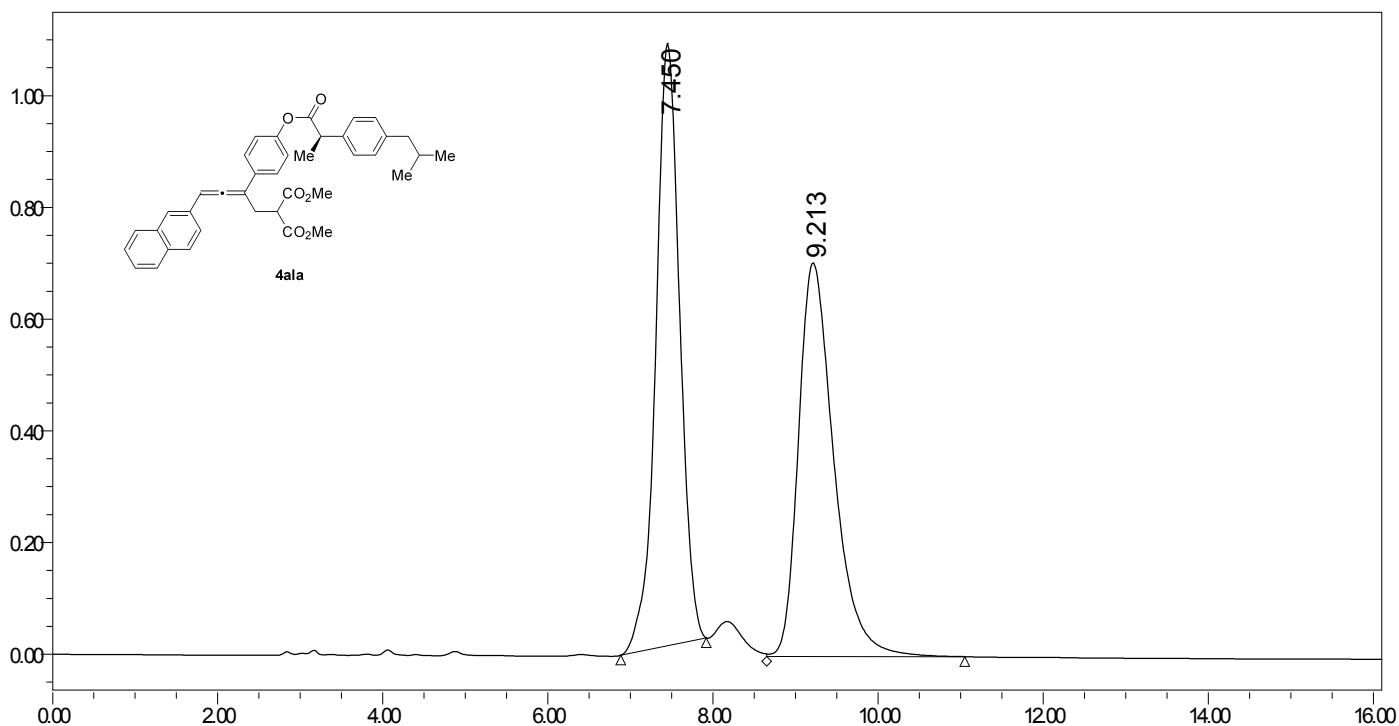

|   | RT    | Area     | %Area | Hight   |
|---|-------|----------|-------|---------|
| 1 | 7.450 | 21738816 | 50.88 | 1078621 |
| 2 | 9.213 | 20988918 | 49.12 | 704686  |

- 7.797
- 7.779
- 7.762
- 7.740
- 7.693
- 7.447
- 7.414
- 7.394
- 7.282
- 7.258
- 7.220
- 6.761

- 3.803
- 3.785
- 3.768
- 3.751
- 3.727
- 3.359
- 3.313
- 3.289
- 3.156
- 3.116
- 2.899
- 2.538
- 2.517
- 2.491
- 2.472
- 2.428
- 2.403
- 2.302
- 2.187
- 2.168
- 2.143
- 2.119
- 2.096
- 2.040
- 1.974
- 1.950
- 1.648
- 1.624
- 1.583
- 1.552
- 1.512
- 1.443
- 1.416
- 0.905
- 0.000

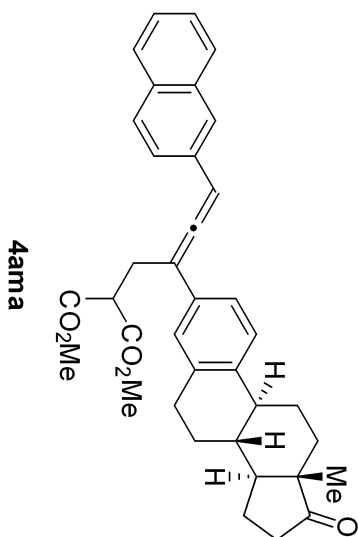

z2n-1-151-H  
 Feb 25 2022  
 SOLVENT: CDCl3  
 NA = 4  
 F1 = 399.717712 MHz  
 F2 = 100.517960 MHz

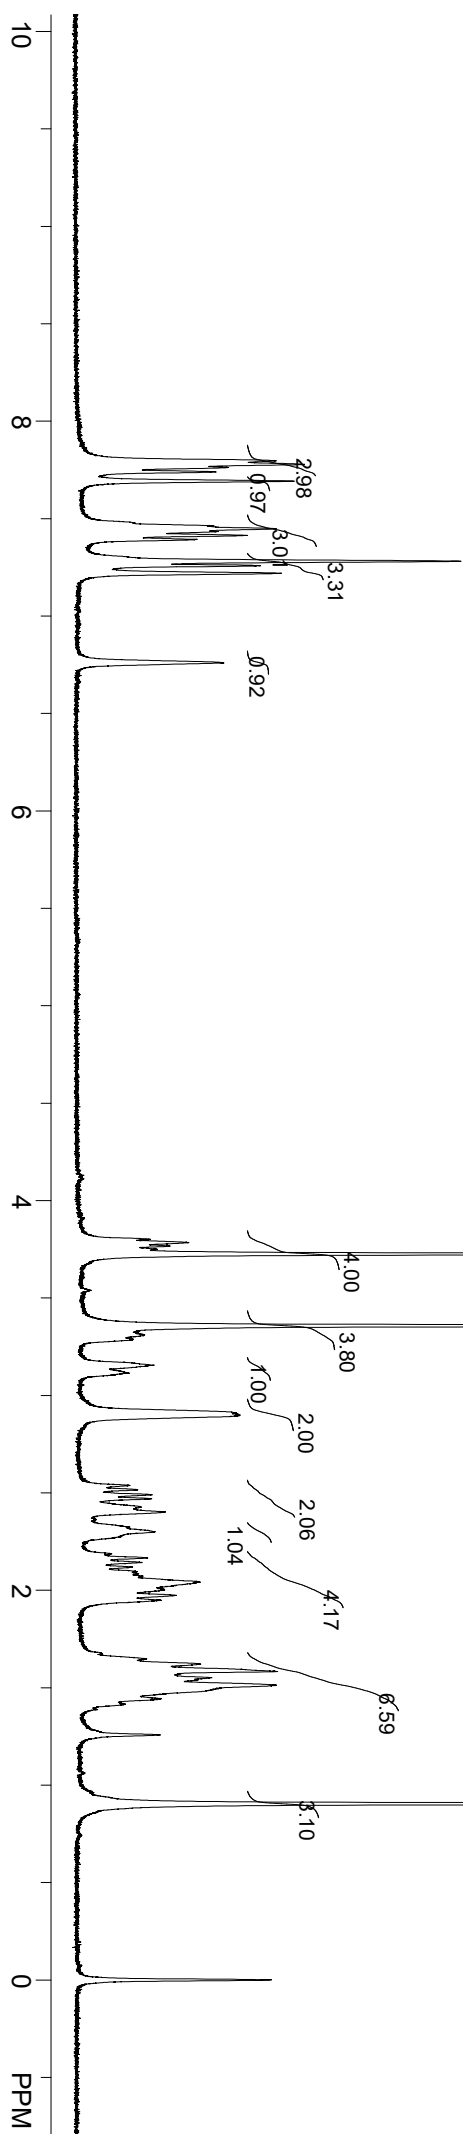



220.865

205.516

169.542

169.125

139.307

136.802

133.606

132.817

132.521

131.276

128.262

127.754

127.693

126.486

126.418

126.281

125.955

125.826

125.681

124.793

123.556

123.487

107.569

100.608

77.319

77.000

76.681

52.724

52.451

50.416

50.097

47.934

44.343

38.073

35.819

31.507

29.457

29.108

26.429

25.647

21.532

13.789

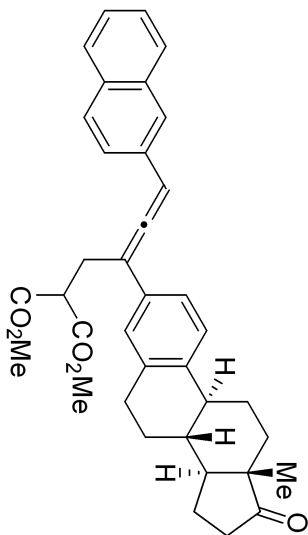

4ama

zzn-1-151-C

Feb 25 2022

SOLVENT: cdcl3

NA = 400

F1 = 100.519485 MHz

F2 = 399.717072 MHz

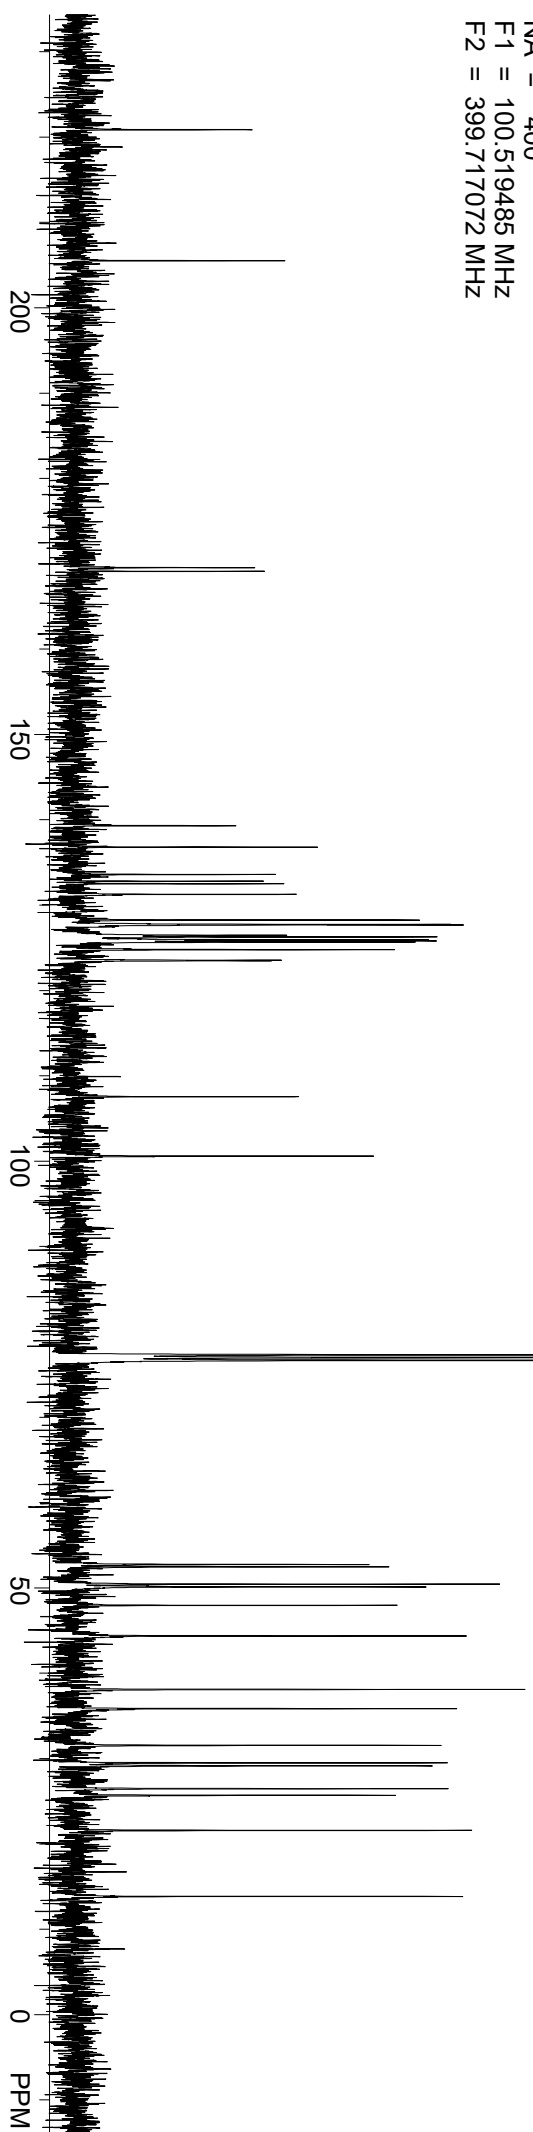

SAMPLE INFORMATION

|                   |                            |                     |                 |
|-------------------|----------------------------|---------------------|-----------------|
| Sample Name:      | zrn-1-151-acth-80-20-1-214 | Acquired By:        | System          |
| Sample Type:      | Unknown                    | Sample Set Name:    |                 |
| Vial:             | 1                          | Acq. Method Set:    | HPLC            |
| Injection#:       | 5                          | Processing Method:  | LCPQ            |
| Injection Volume: | 5.00 µl                    | Channel Name:       | W2489 ChA       |
| Run Time:         | 100.0 Minutes              | Proc. Chnl. Descr.: | W2489 ChA.214mm |
| Date Acquired:    | 3/9/2022 5:52:05 PMEST     |                     |                 |
| Date Processed:   | 3/10/2022 6:30:30 PMEST    |                     |                 |

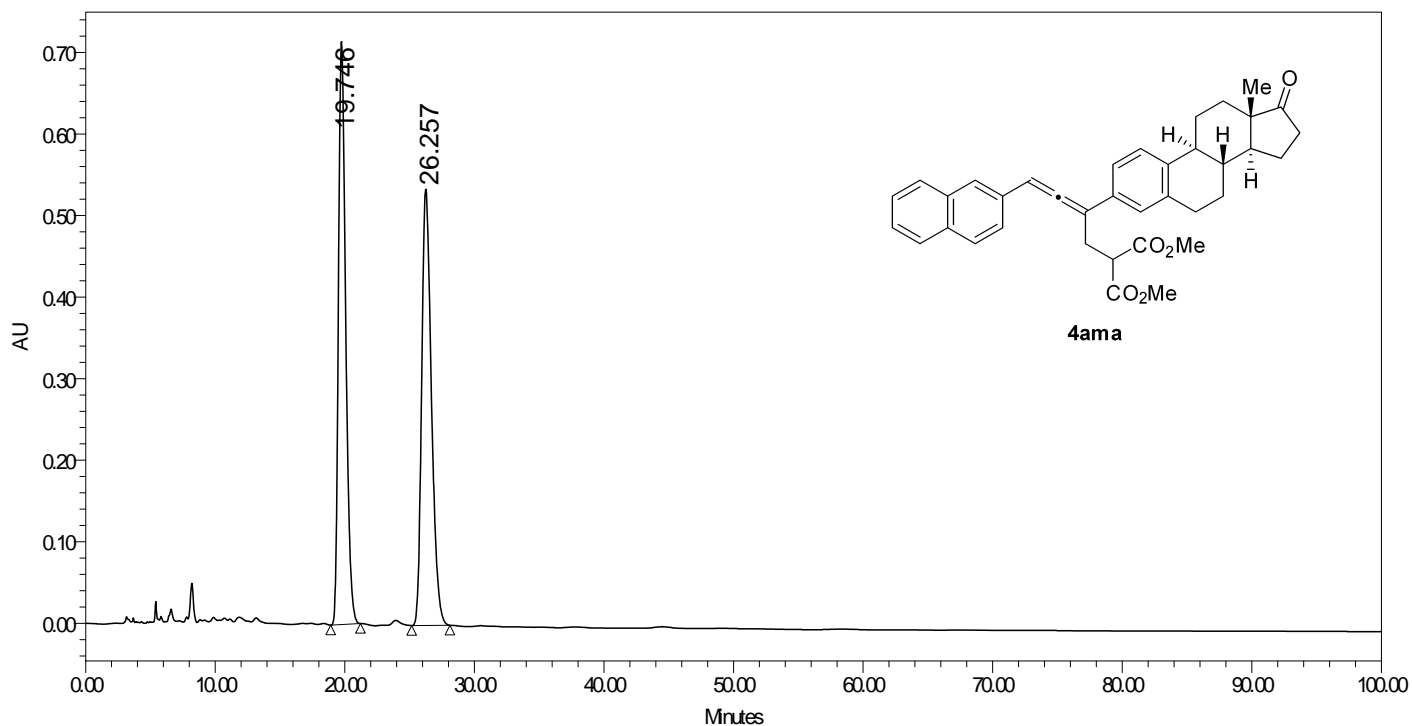

|   | RT     | Area     | %Area | Height |
|---|--------|----------|-------|--------|
| 1 | 19.746 | 27899647 | 49.90 | 714841 |
| 2 | 26.257 | 28016707 | 50.10 | 535137 |

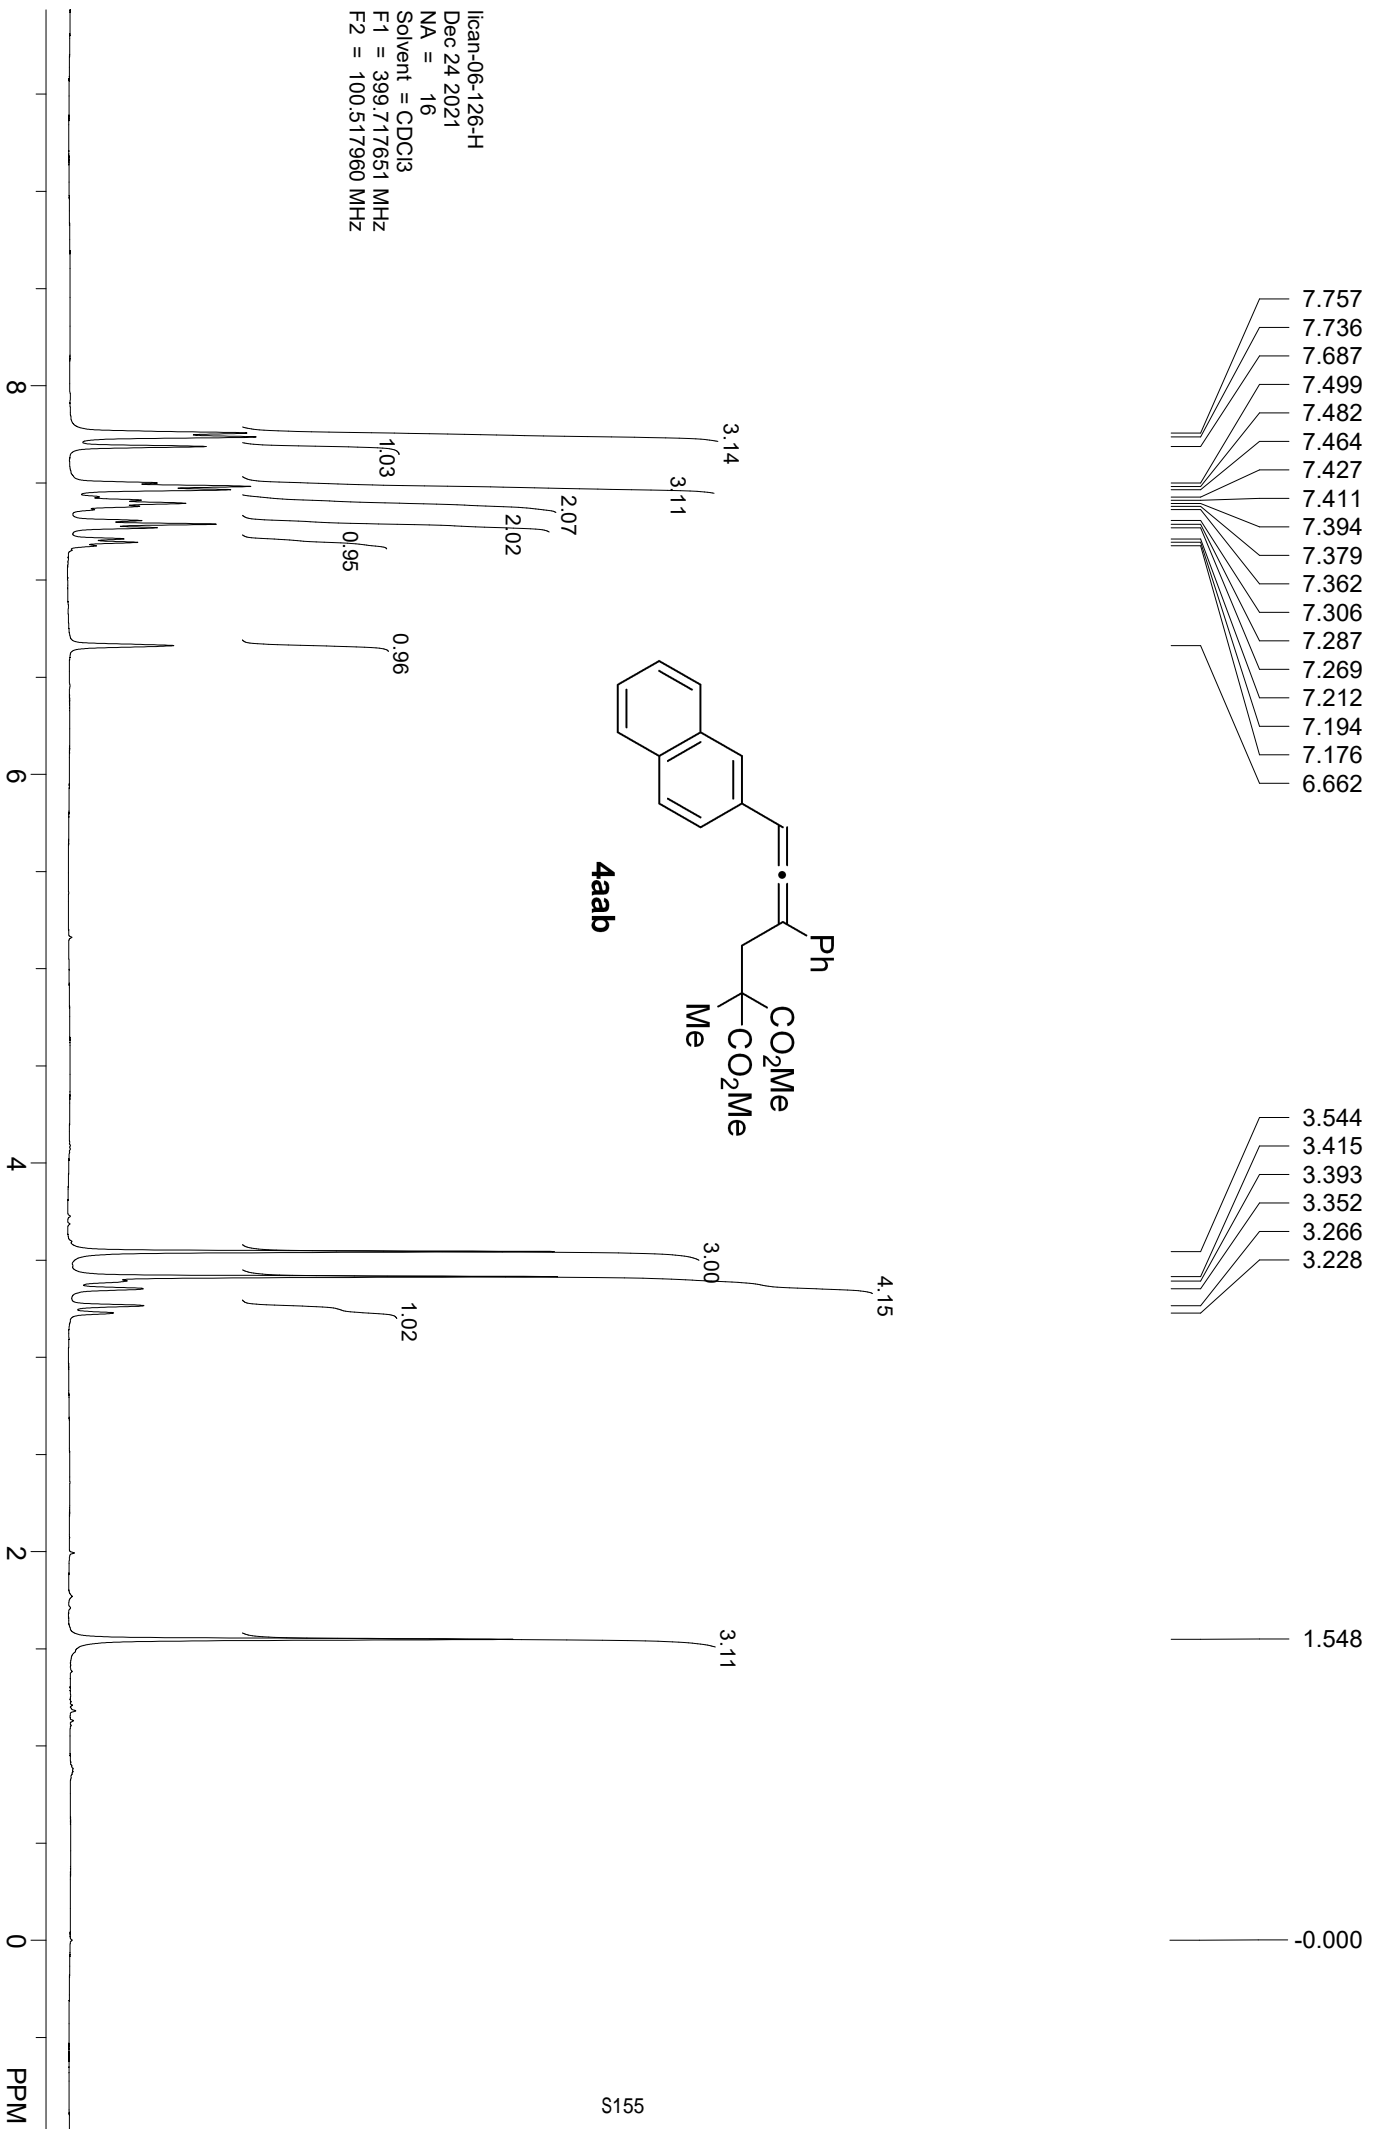

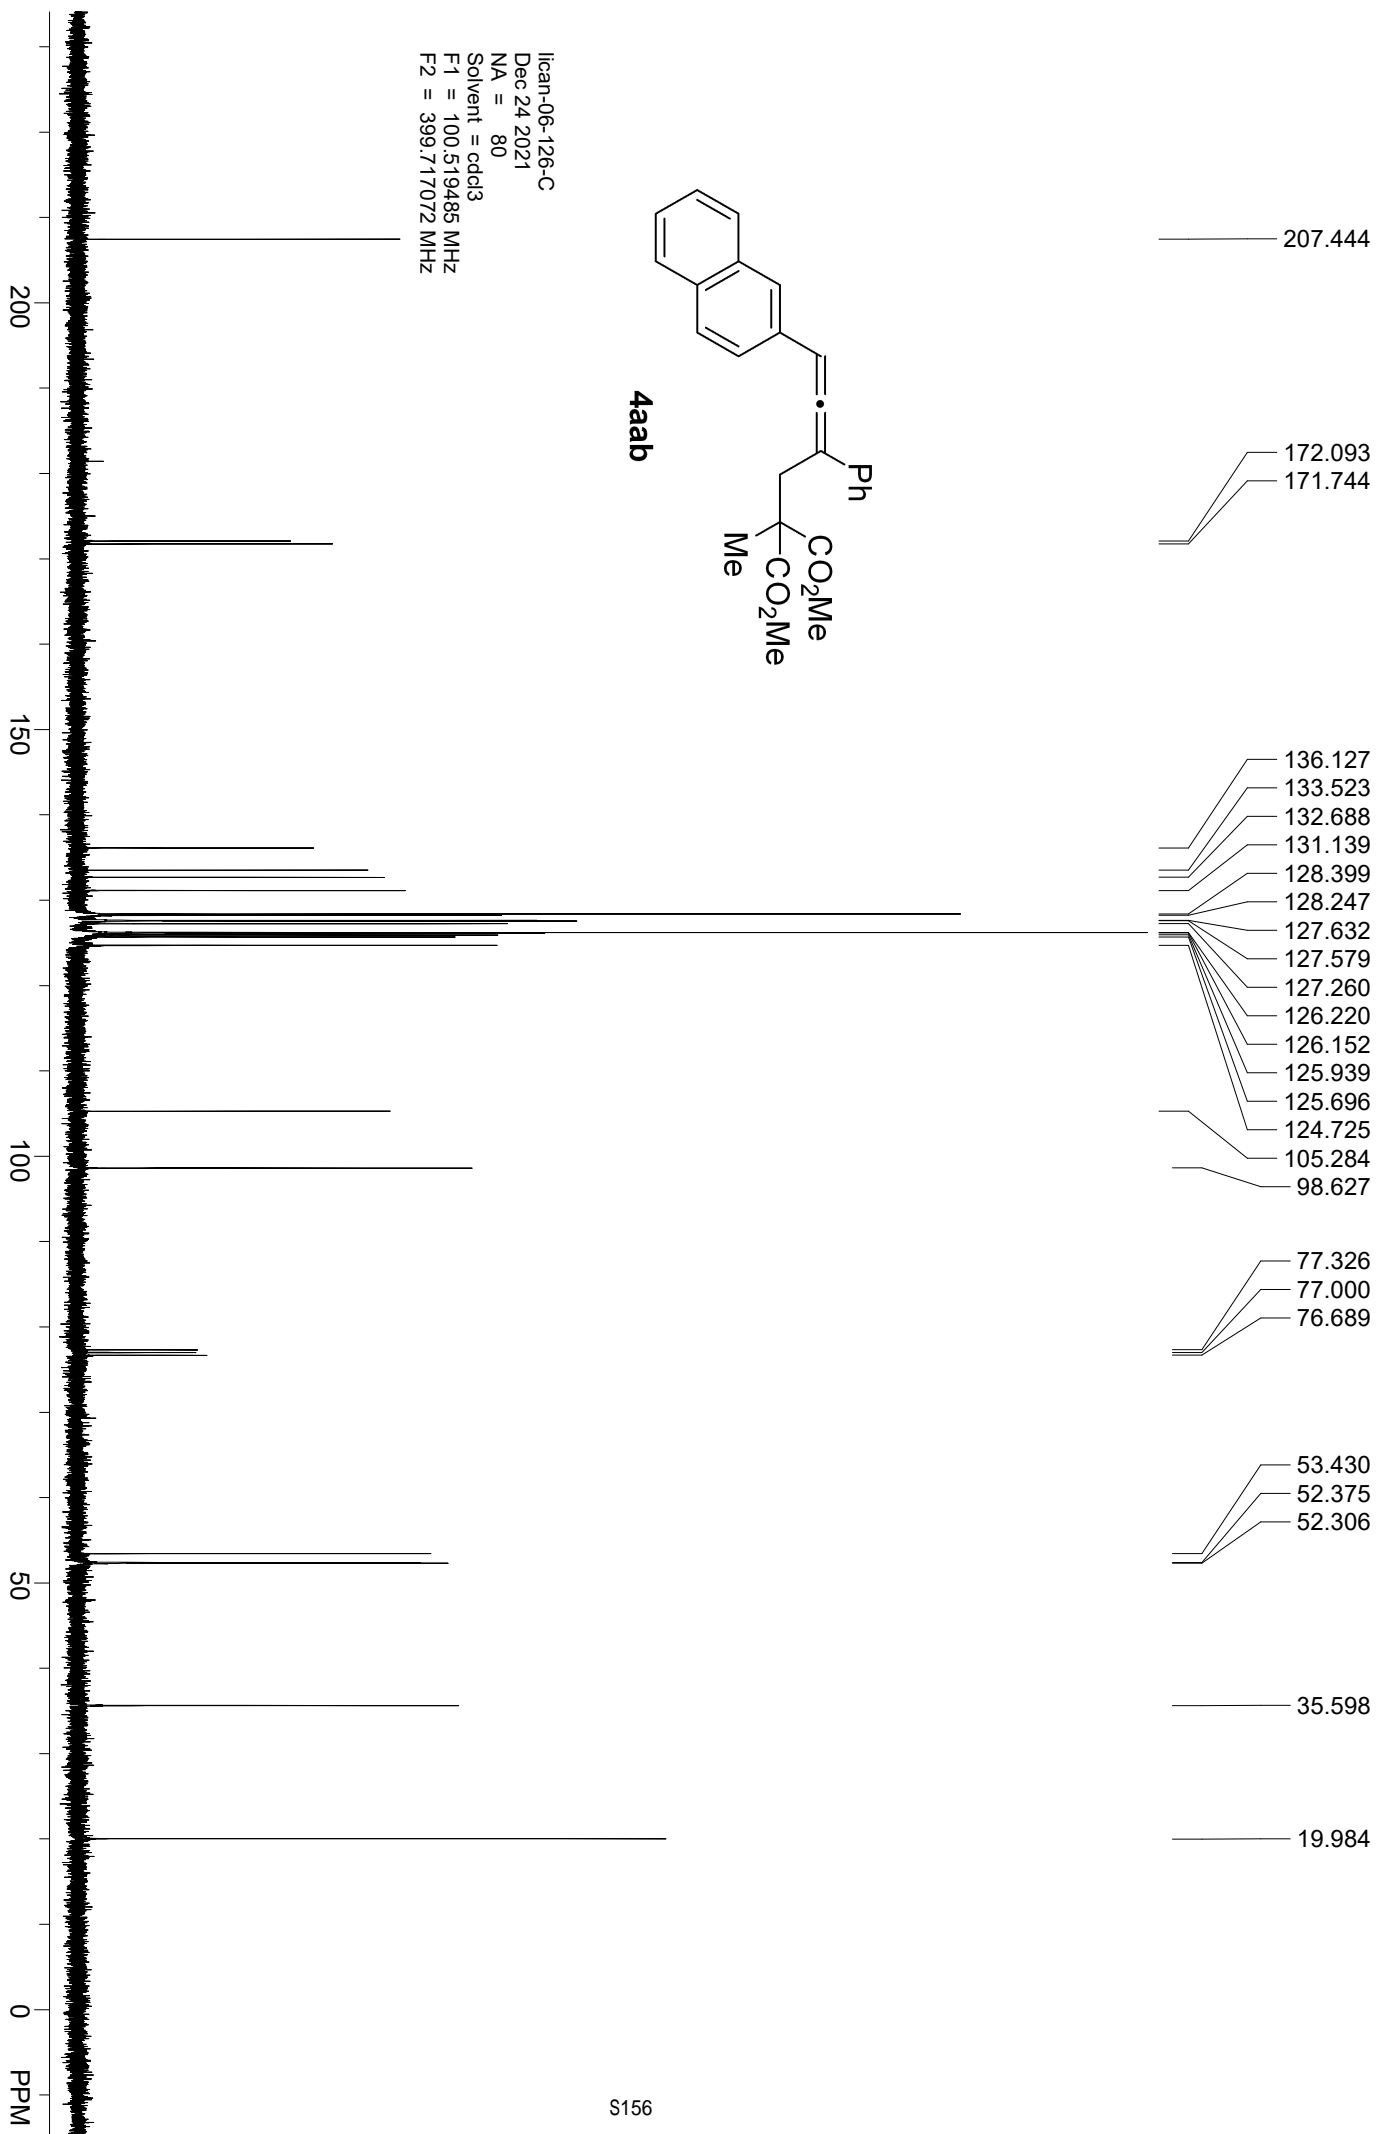

llican-06-119-H  
 Dec 17 2021  
 NA = 8  
 Solvent = CDCl3  
 F1 = 399.717651 MHz  
 F2 = 100.517960 MHz

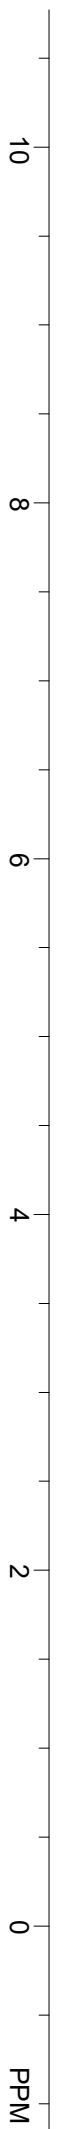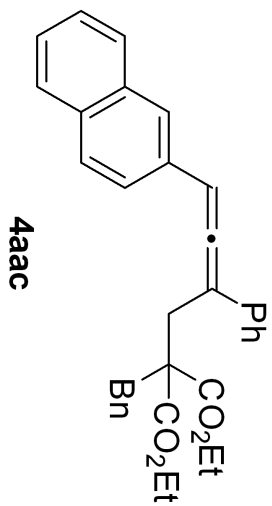

lican-06-119-purity  
purity = 97%  
31.6 mg product with 35 uL dibromomethane  
Dec 18 2021  
NA = 8  
Solvent = CDCl3  
F1 = 399.717651 MHz  
F2 = 100.517960 MHz

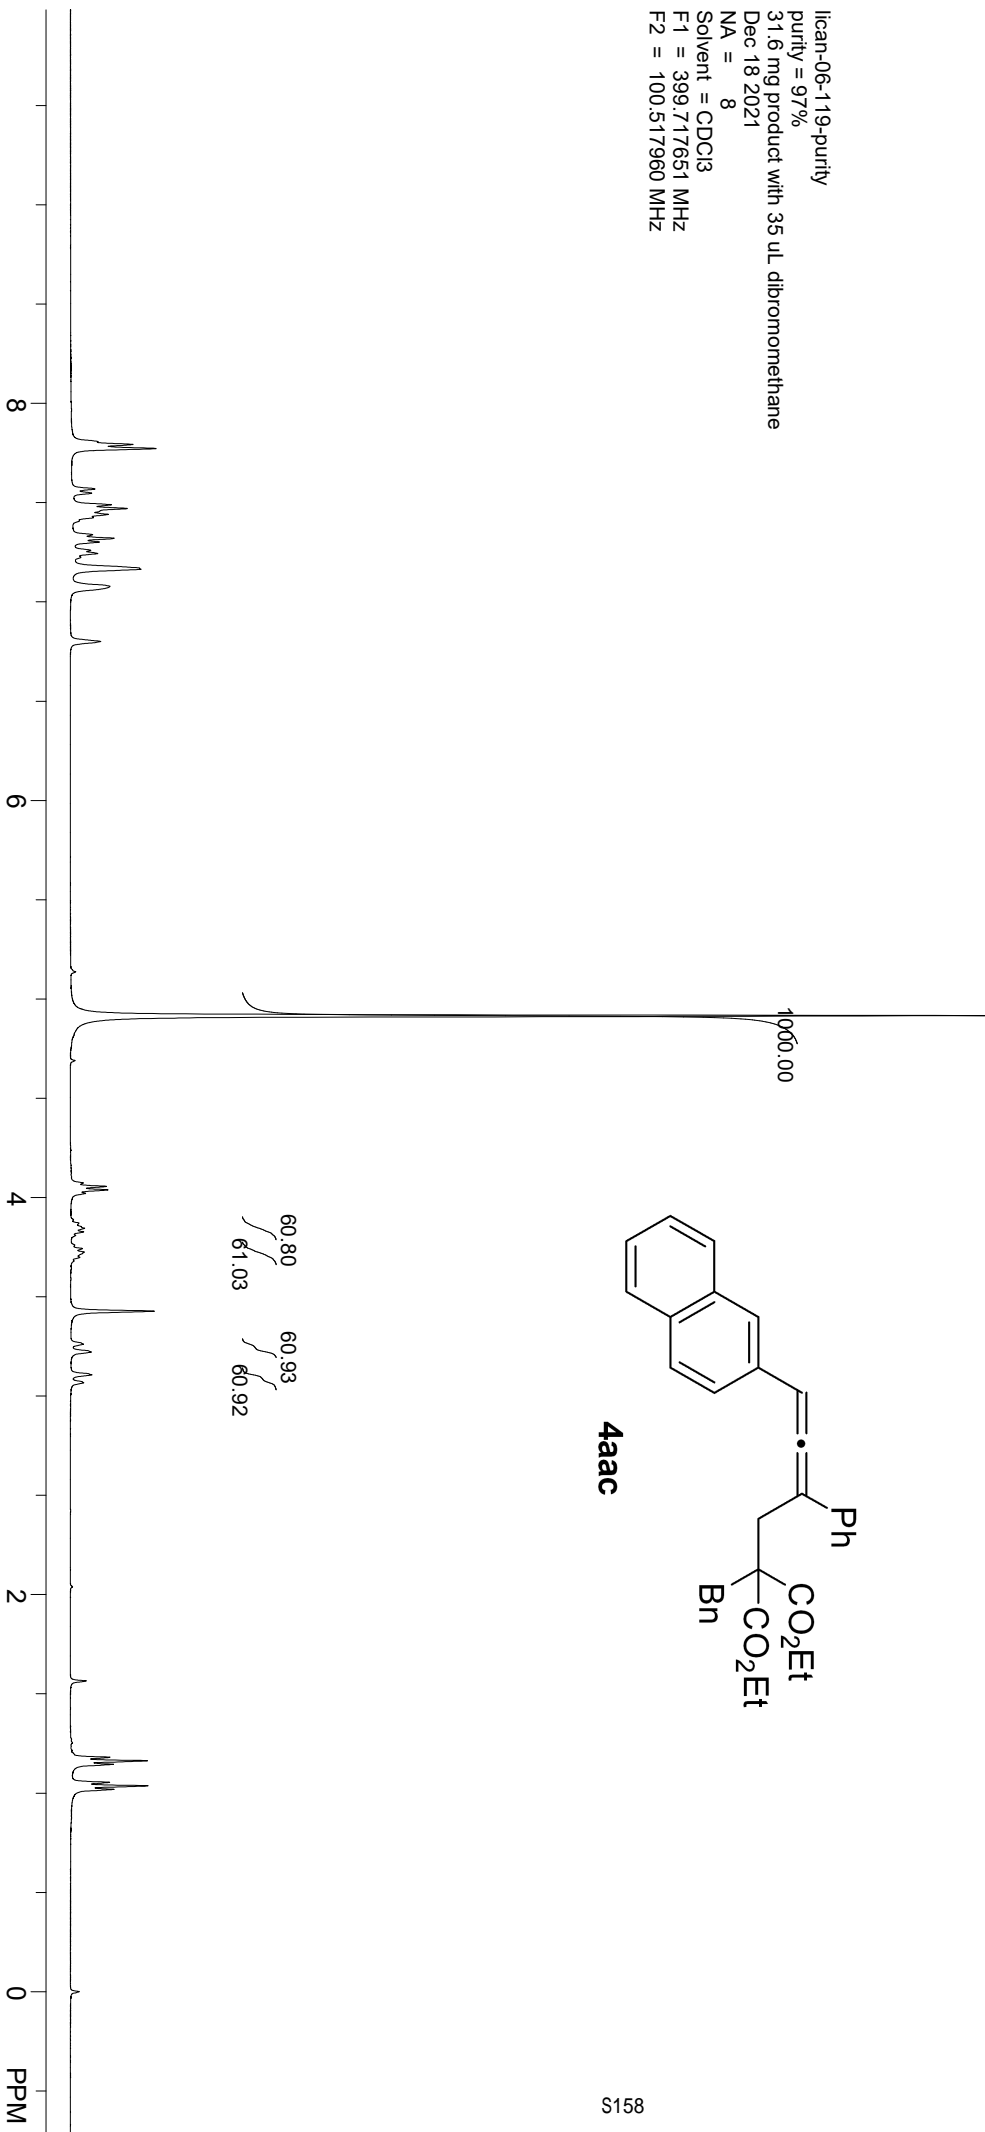

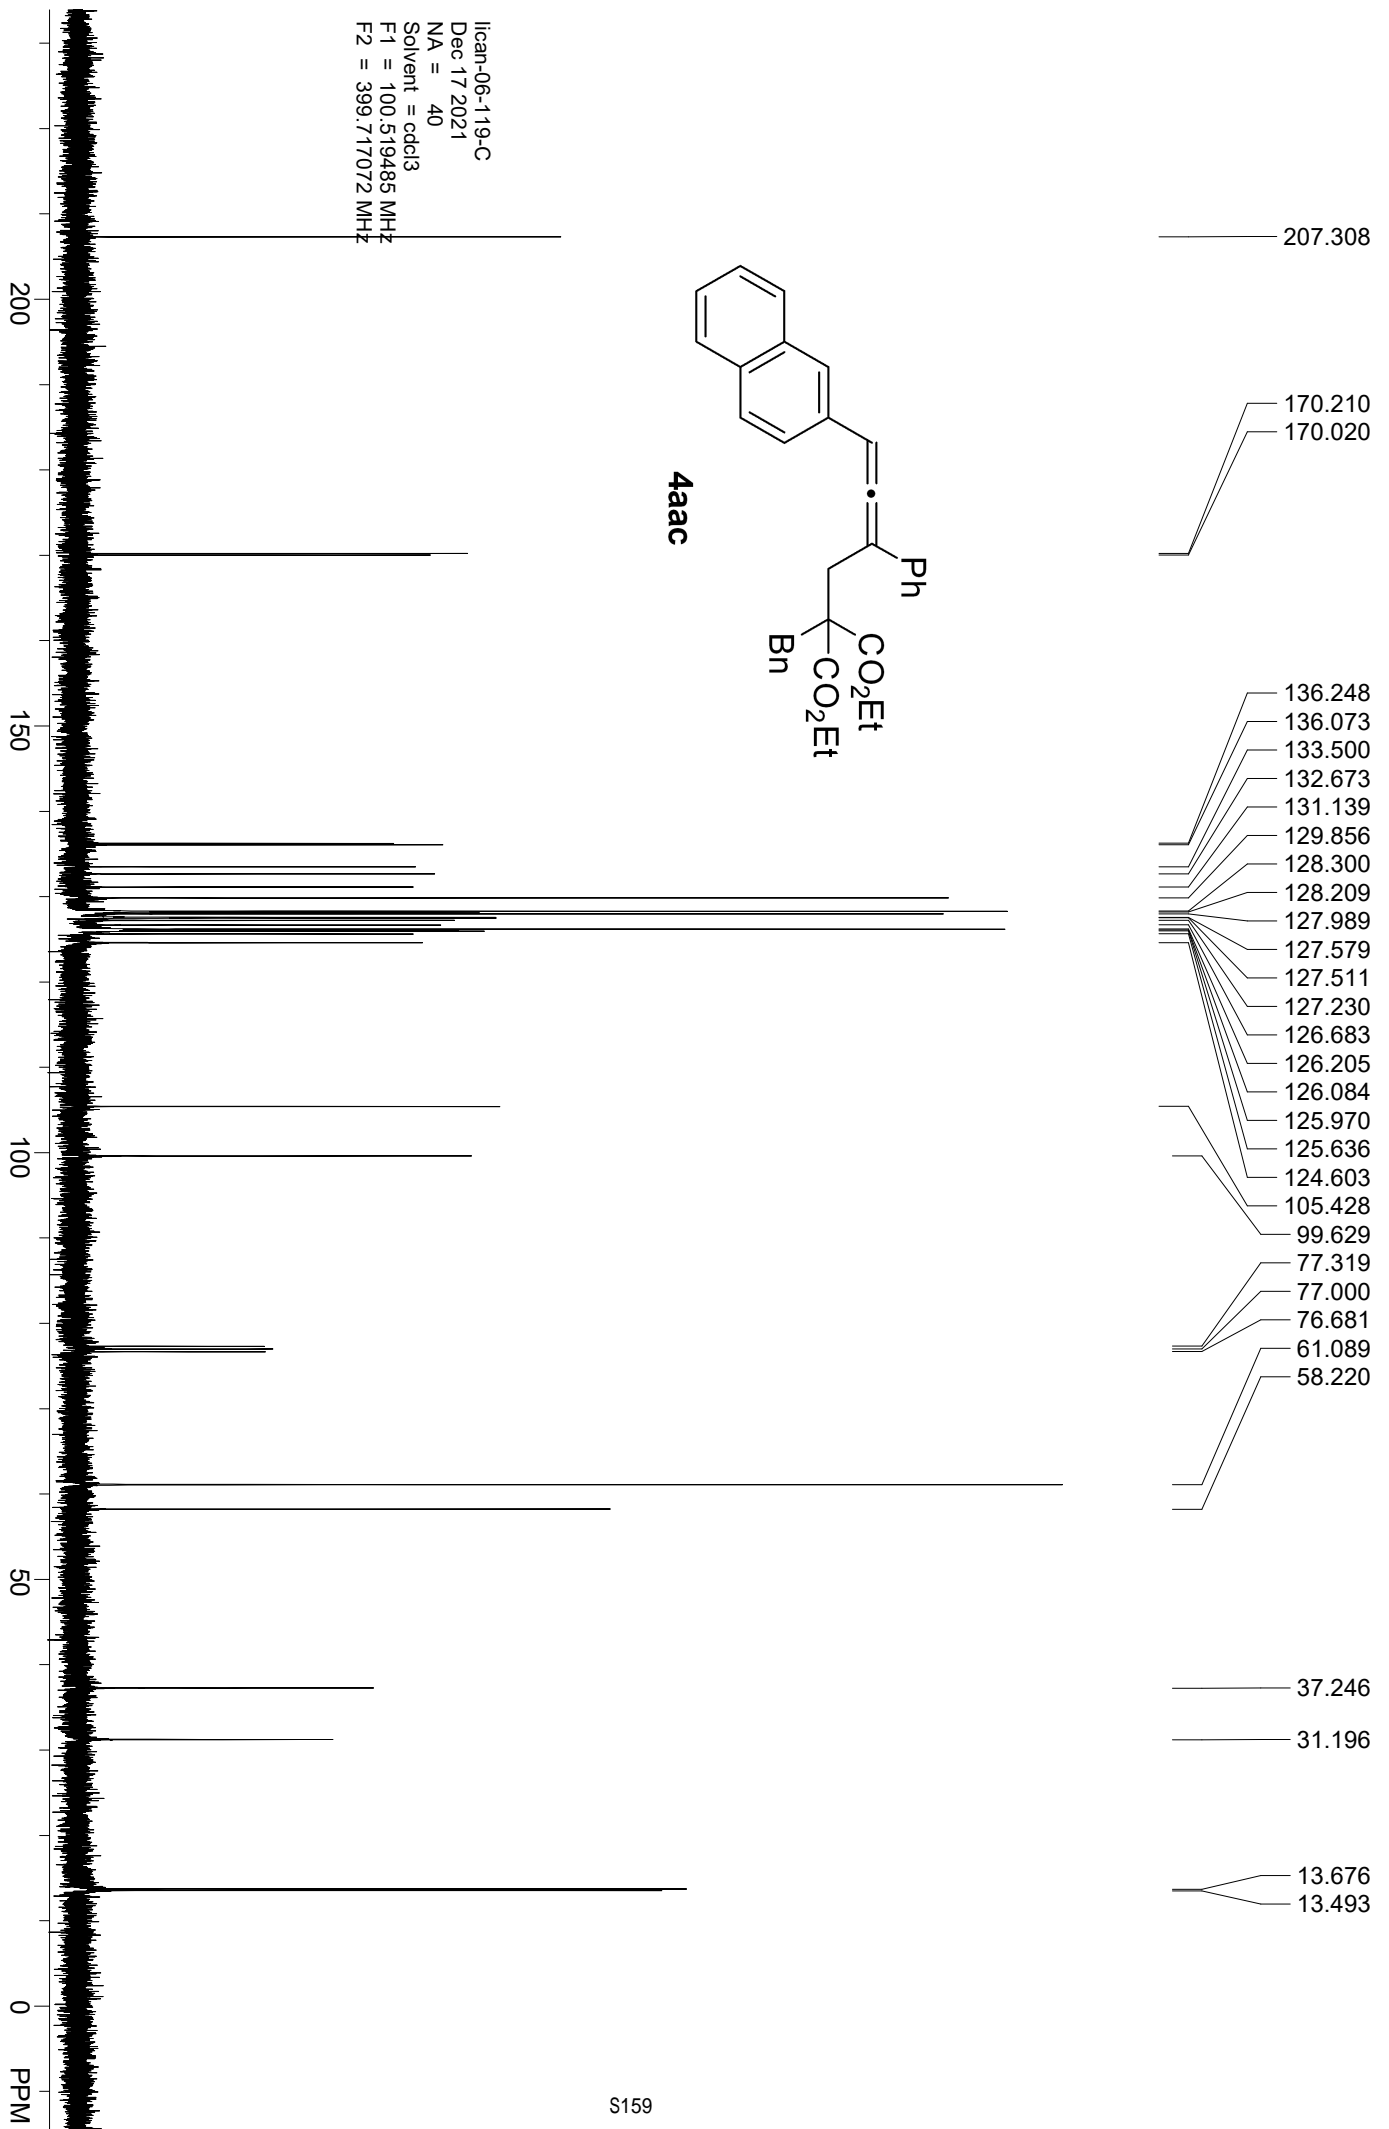

lican-06-127-H  
Dec 24 2021  
NA = 12  
Solvent = CDCl3  
F1 = 399.717651 MHz  
F2 = 100.517960 MHz

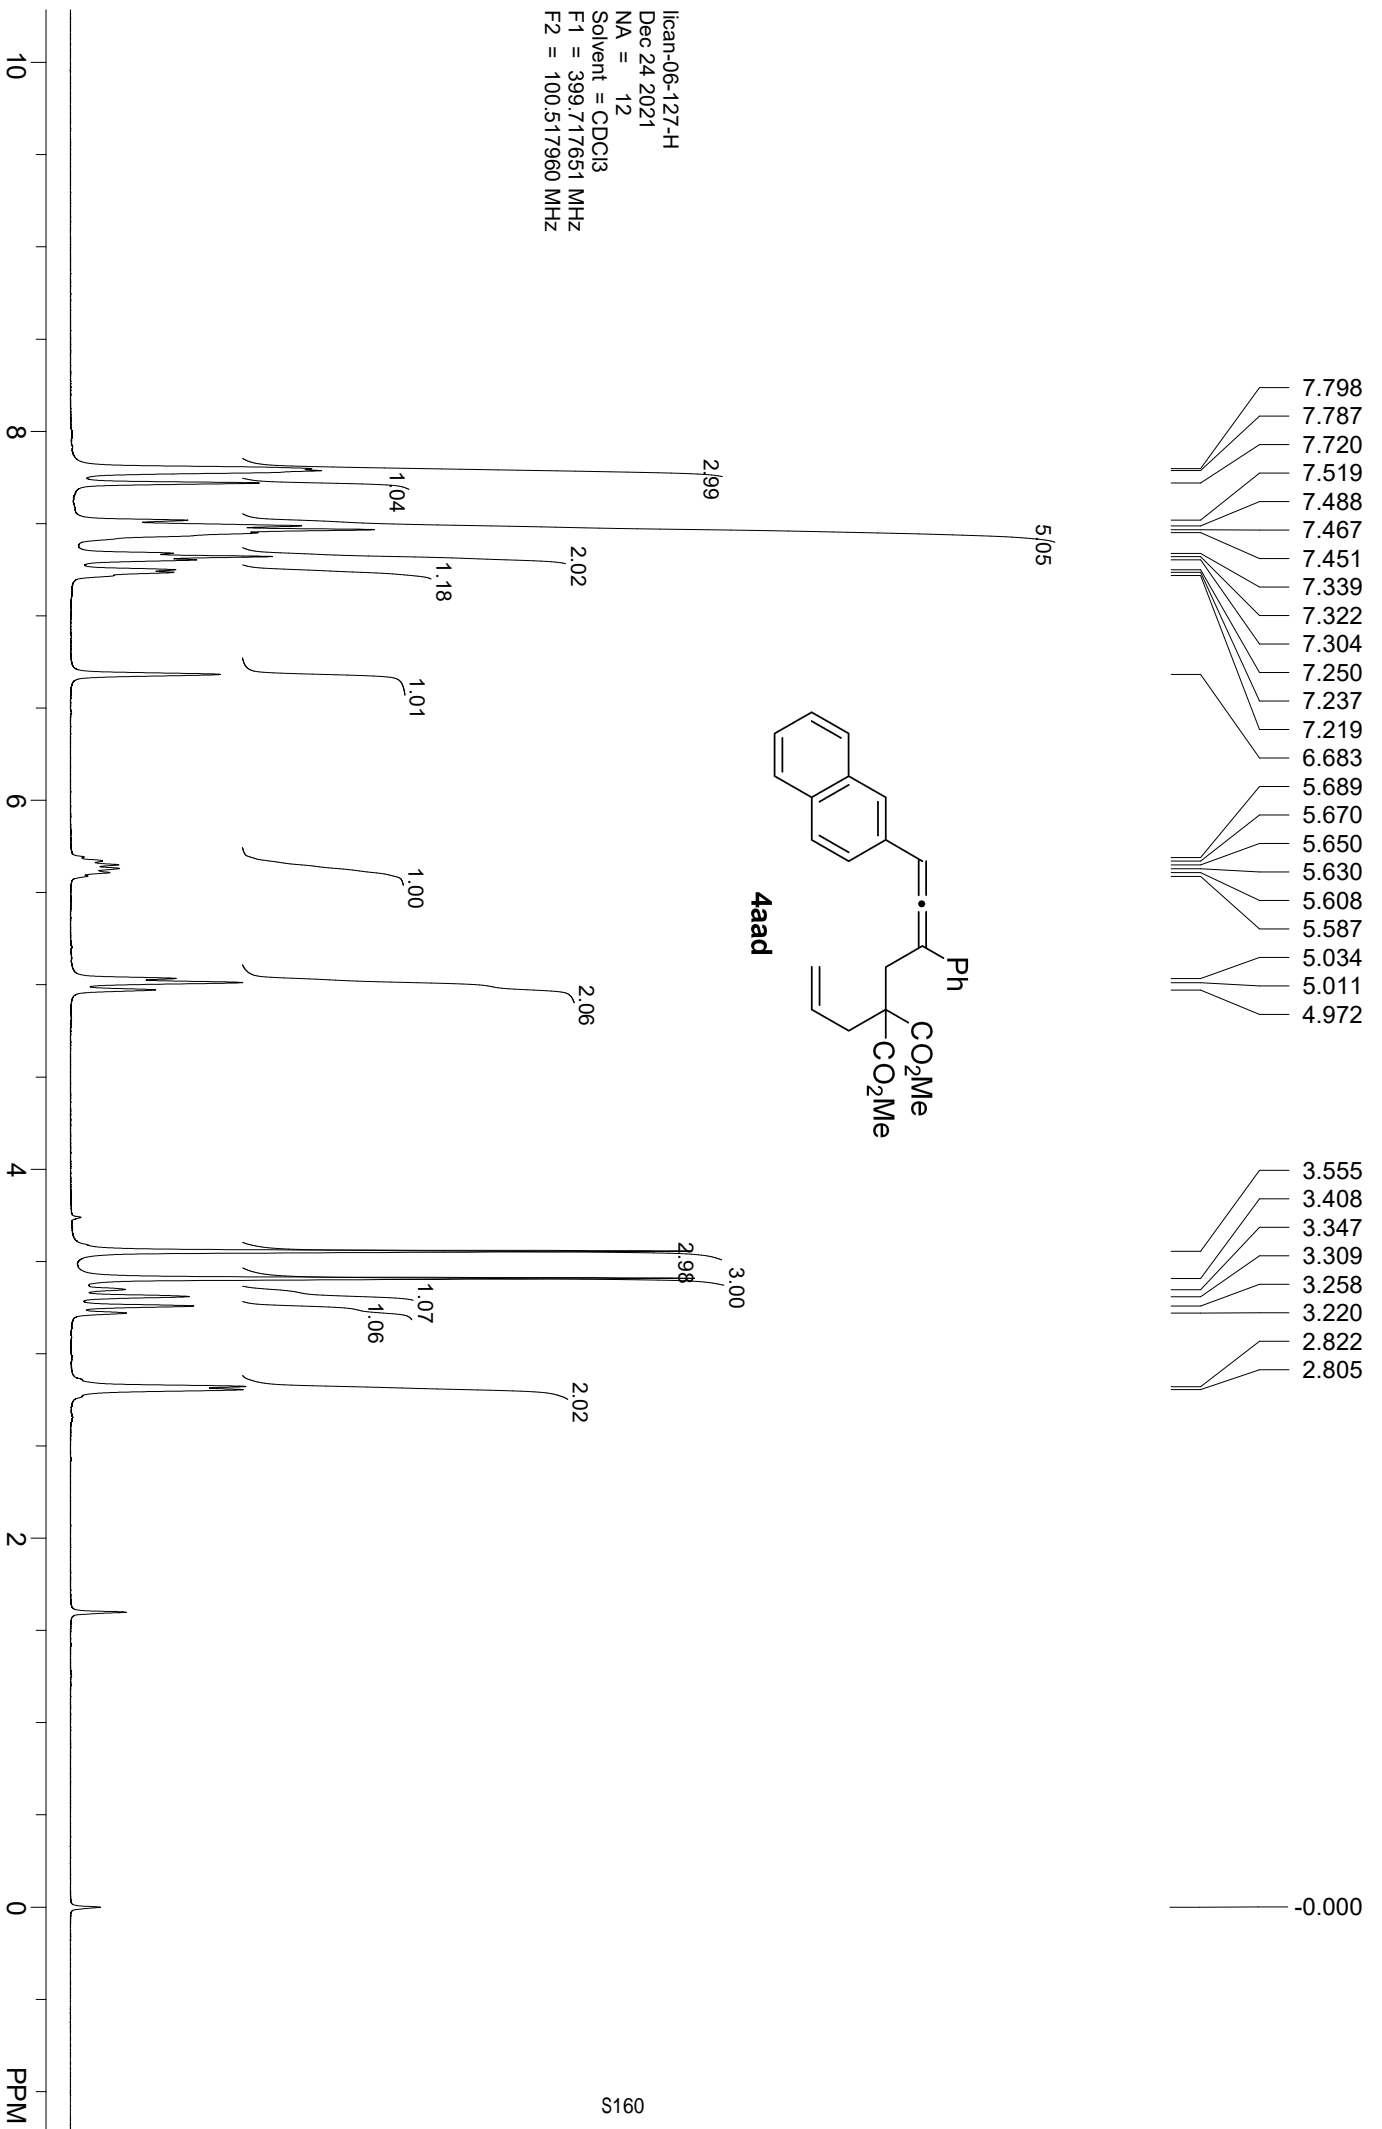



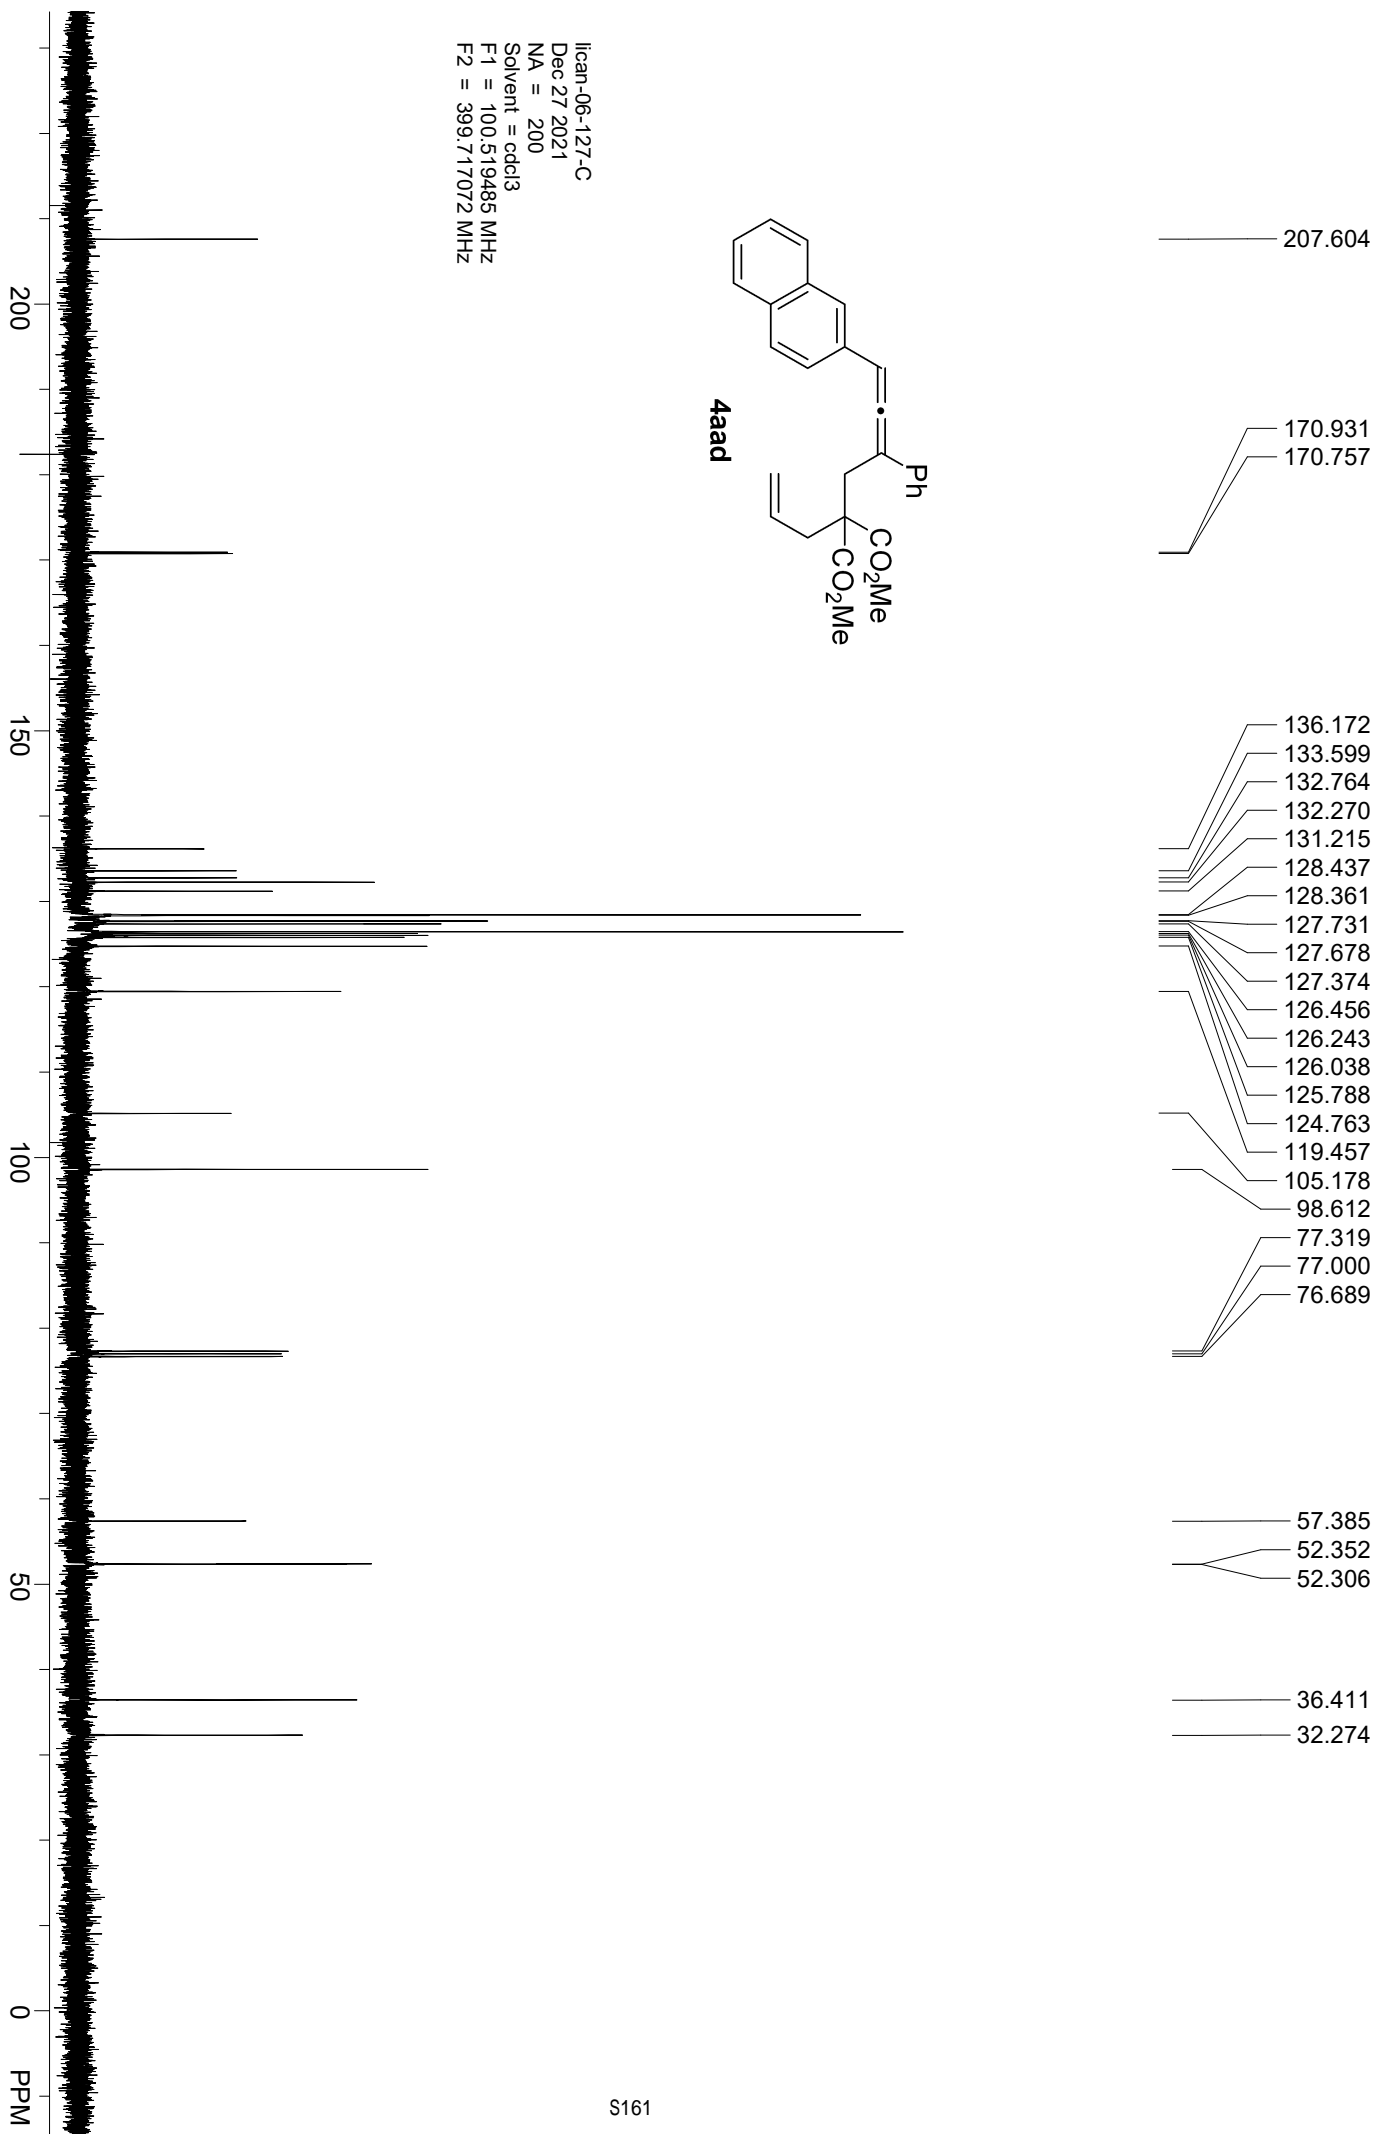

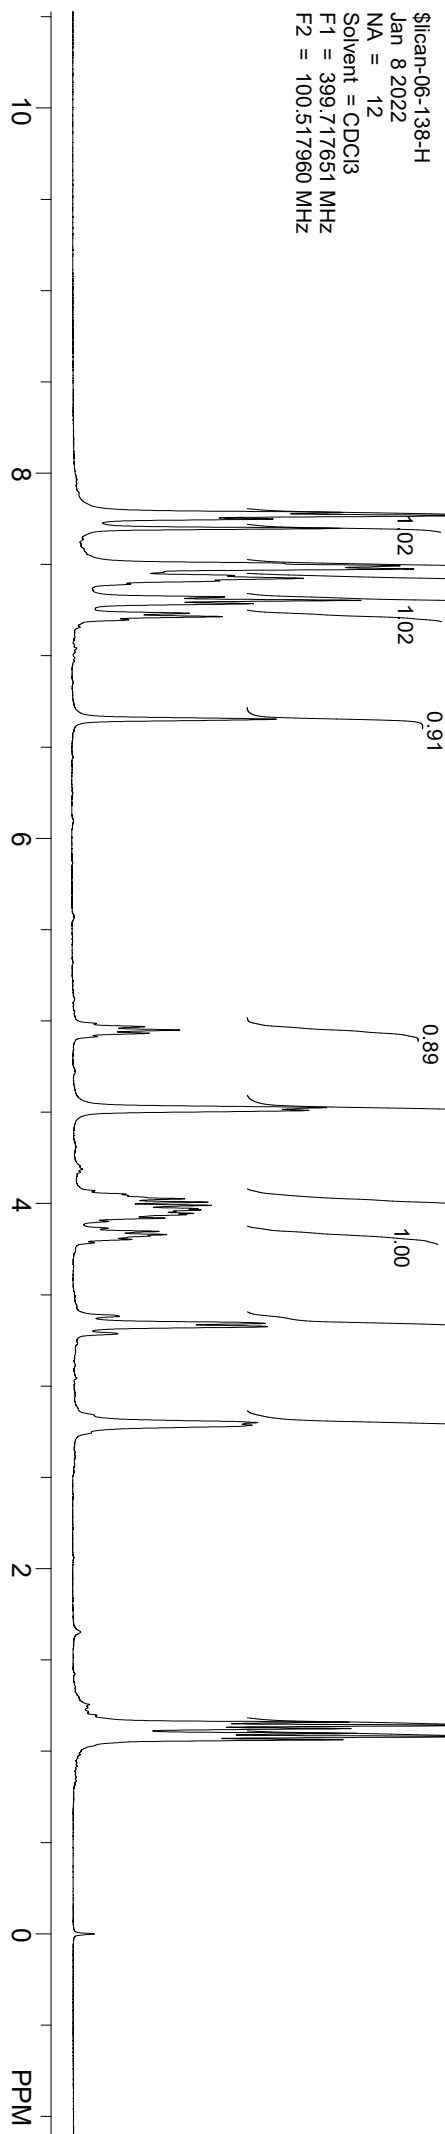

- 7.784
- 7.768
- 7.749
- 7.698
- 7.504
- 7.475
- 7.439
- 7.425
- 7.409
- 7.392
- 7.322
- 7.304
- 7.285
- 7.232
- 7.215
- 7.197
- 6.653
- 4.985
- 4.968
- 4.949
- 4.932
- 4.914
- 4.524
- 4.509
- 4.051
- 4.025
- 4.007
- 3.989
- 3.971
- 3.964
- 3.945
- 3.938
- 3.919
- 3.901
- 3.864
- 3.846
- 3.829
- 3.802
- 3.785
- 3.381
- 3.343
- 3.325
- 3.287
- 2.833
- 2.800
- 2.785
- 2.744
- 1.160
- 1.142
- 1.124
- 1.098
- 1.081
- 1.063
- 0.000

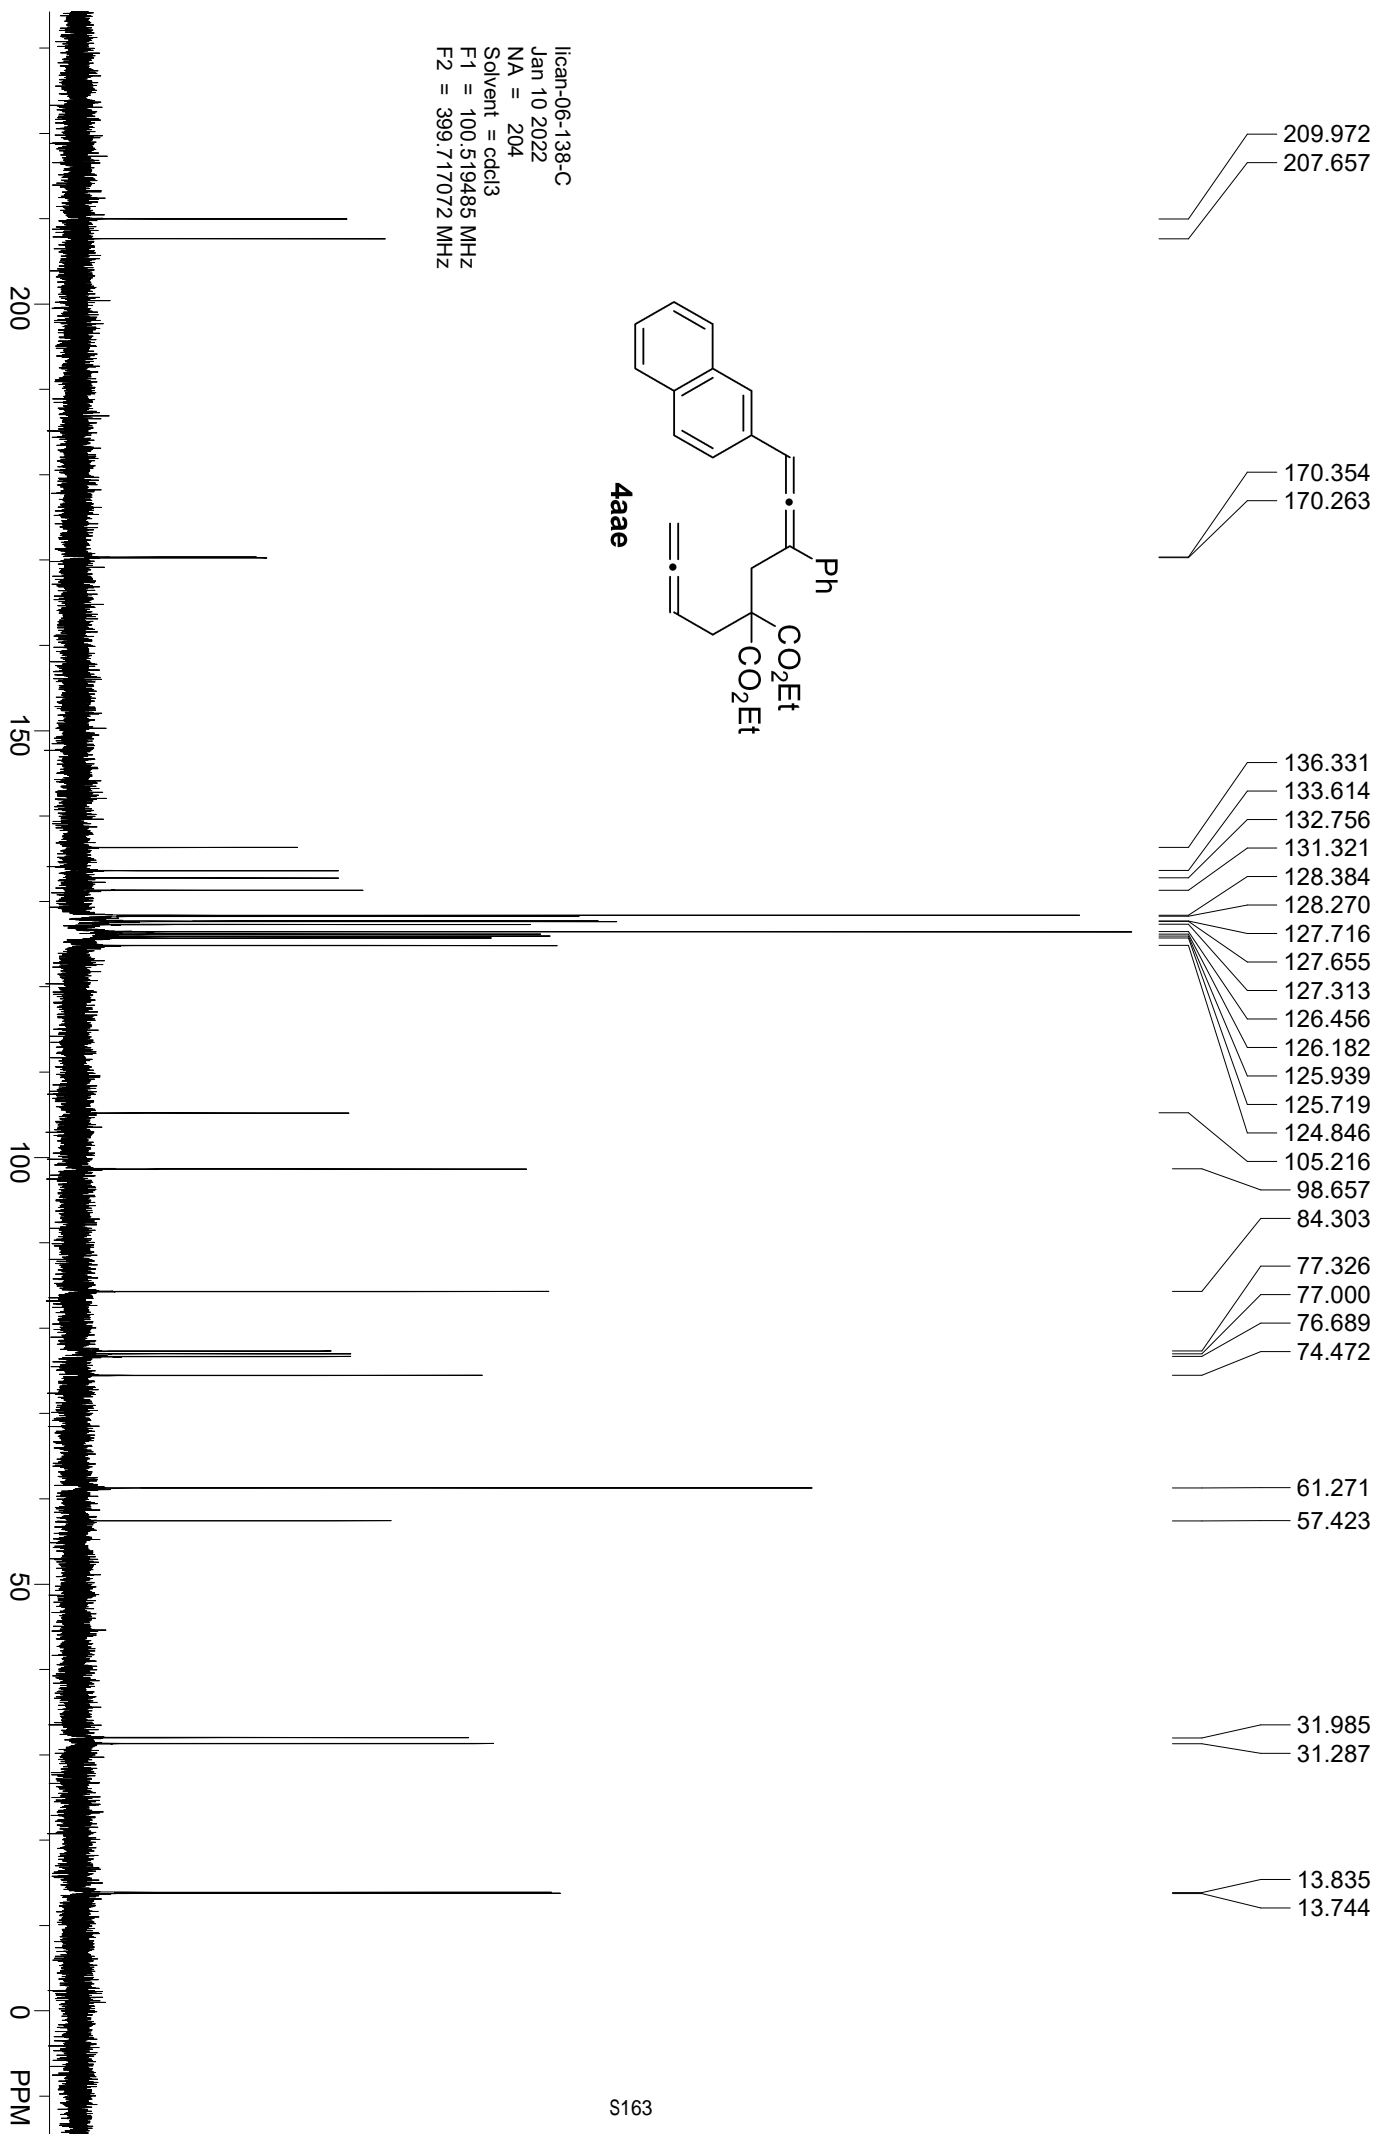

- 7.826
- 7.806
- 7.740
- 7.544
- 7.523
- 7.475
- 7.457
- 7.337
- 7.319
- 7.300
- 7.253
- 7.233
- 7.216
- 6.738
- 6.645

- 4.192
- 4.165
- 4.147
- 4.129
- 4.111
- 4.101
- 4.084
- 3.953
- 3.936
- 3.918
- 3.892
- 3.870
- 3.768
- 3.731
- 3.709
- 3.668

- 1.504
- 1.189
- 1.171
- 1.152
- 1.131
- 1.114

-0.000

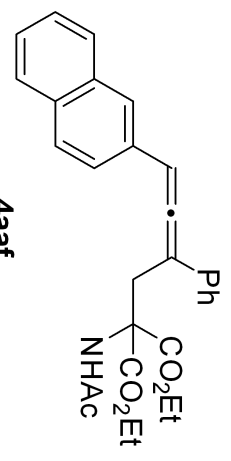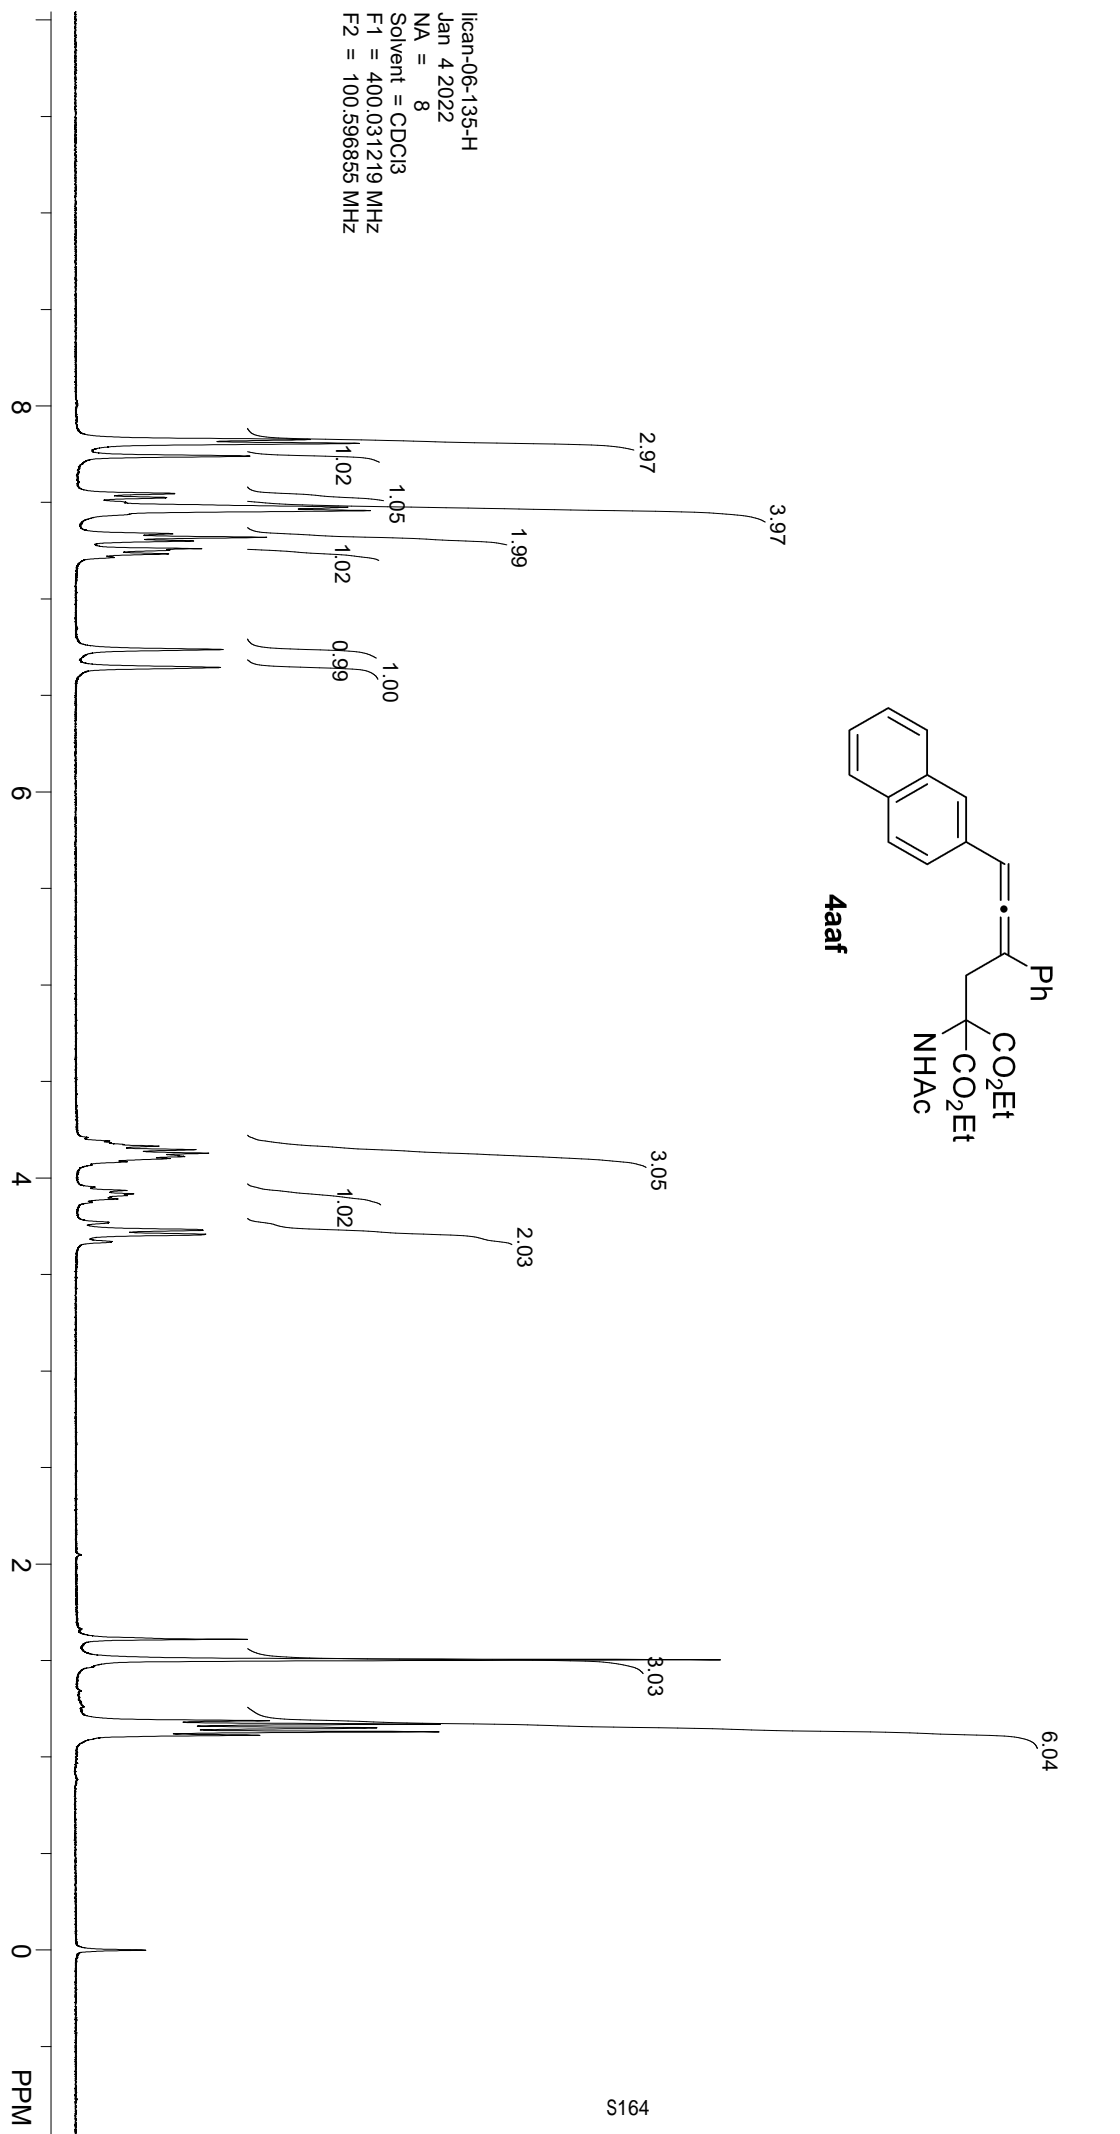

lican-06-135-H  
 Jan 4 2022  
 NA = 8  
 Solvent = CDCl3  
 F1 = 400.031219 MHz  
 F2 = 100.596855 MHz

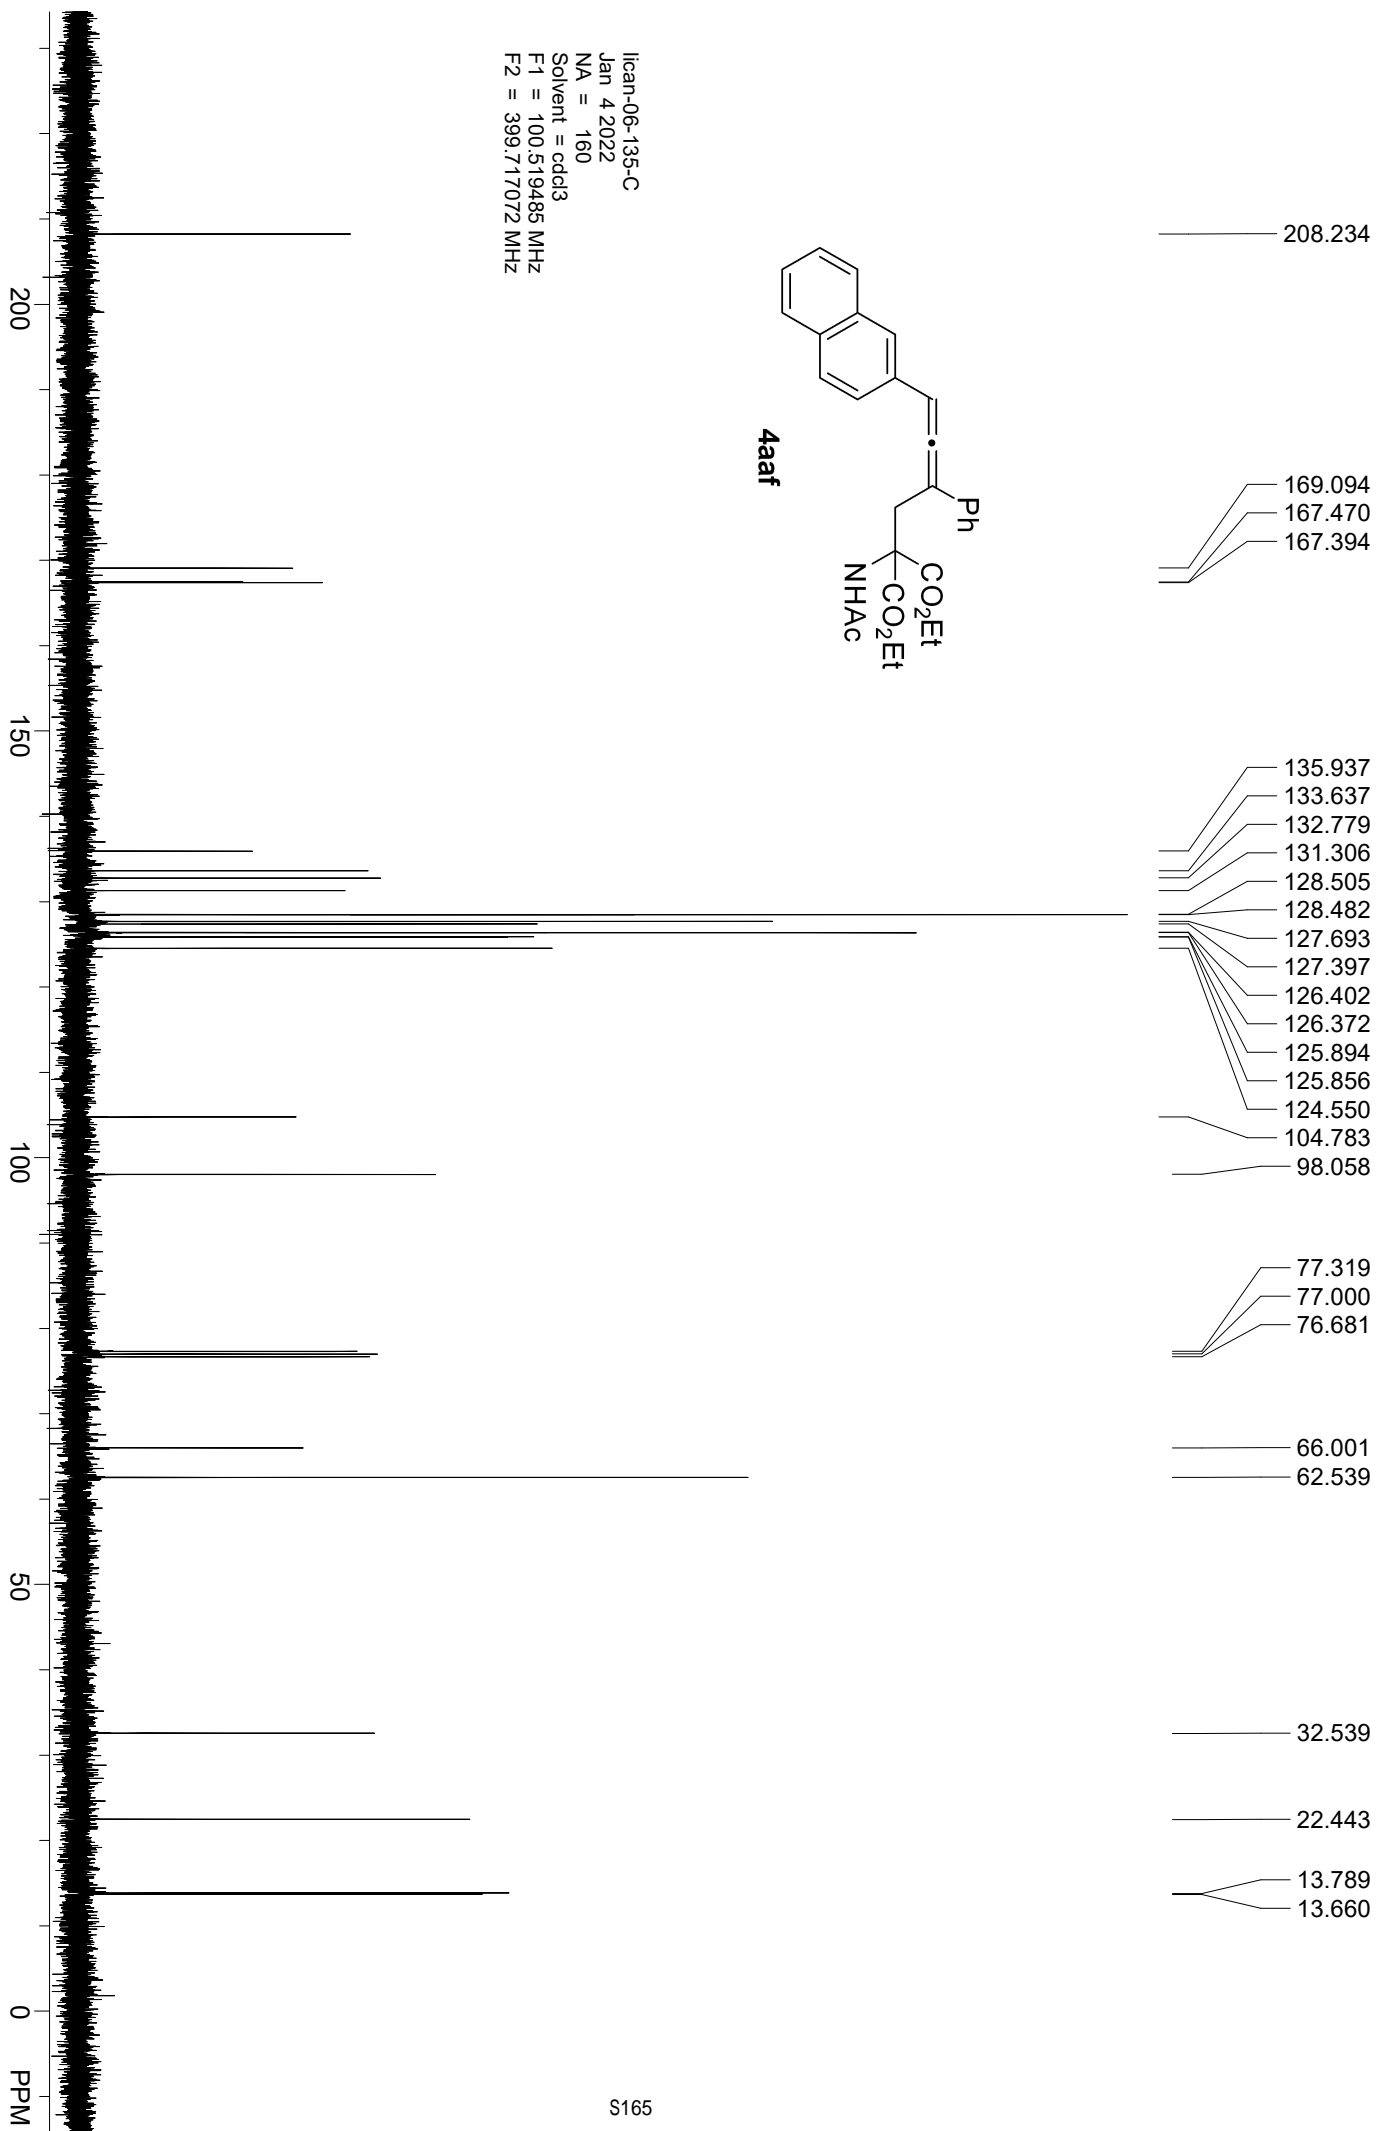

llean-06-164-H  
Feb 27 2022  
NA = 8  
Solvent = CDCl3  
F1 = 399.717712 MHz  
F2 = 100.517960 MHz

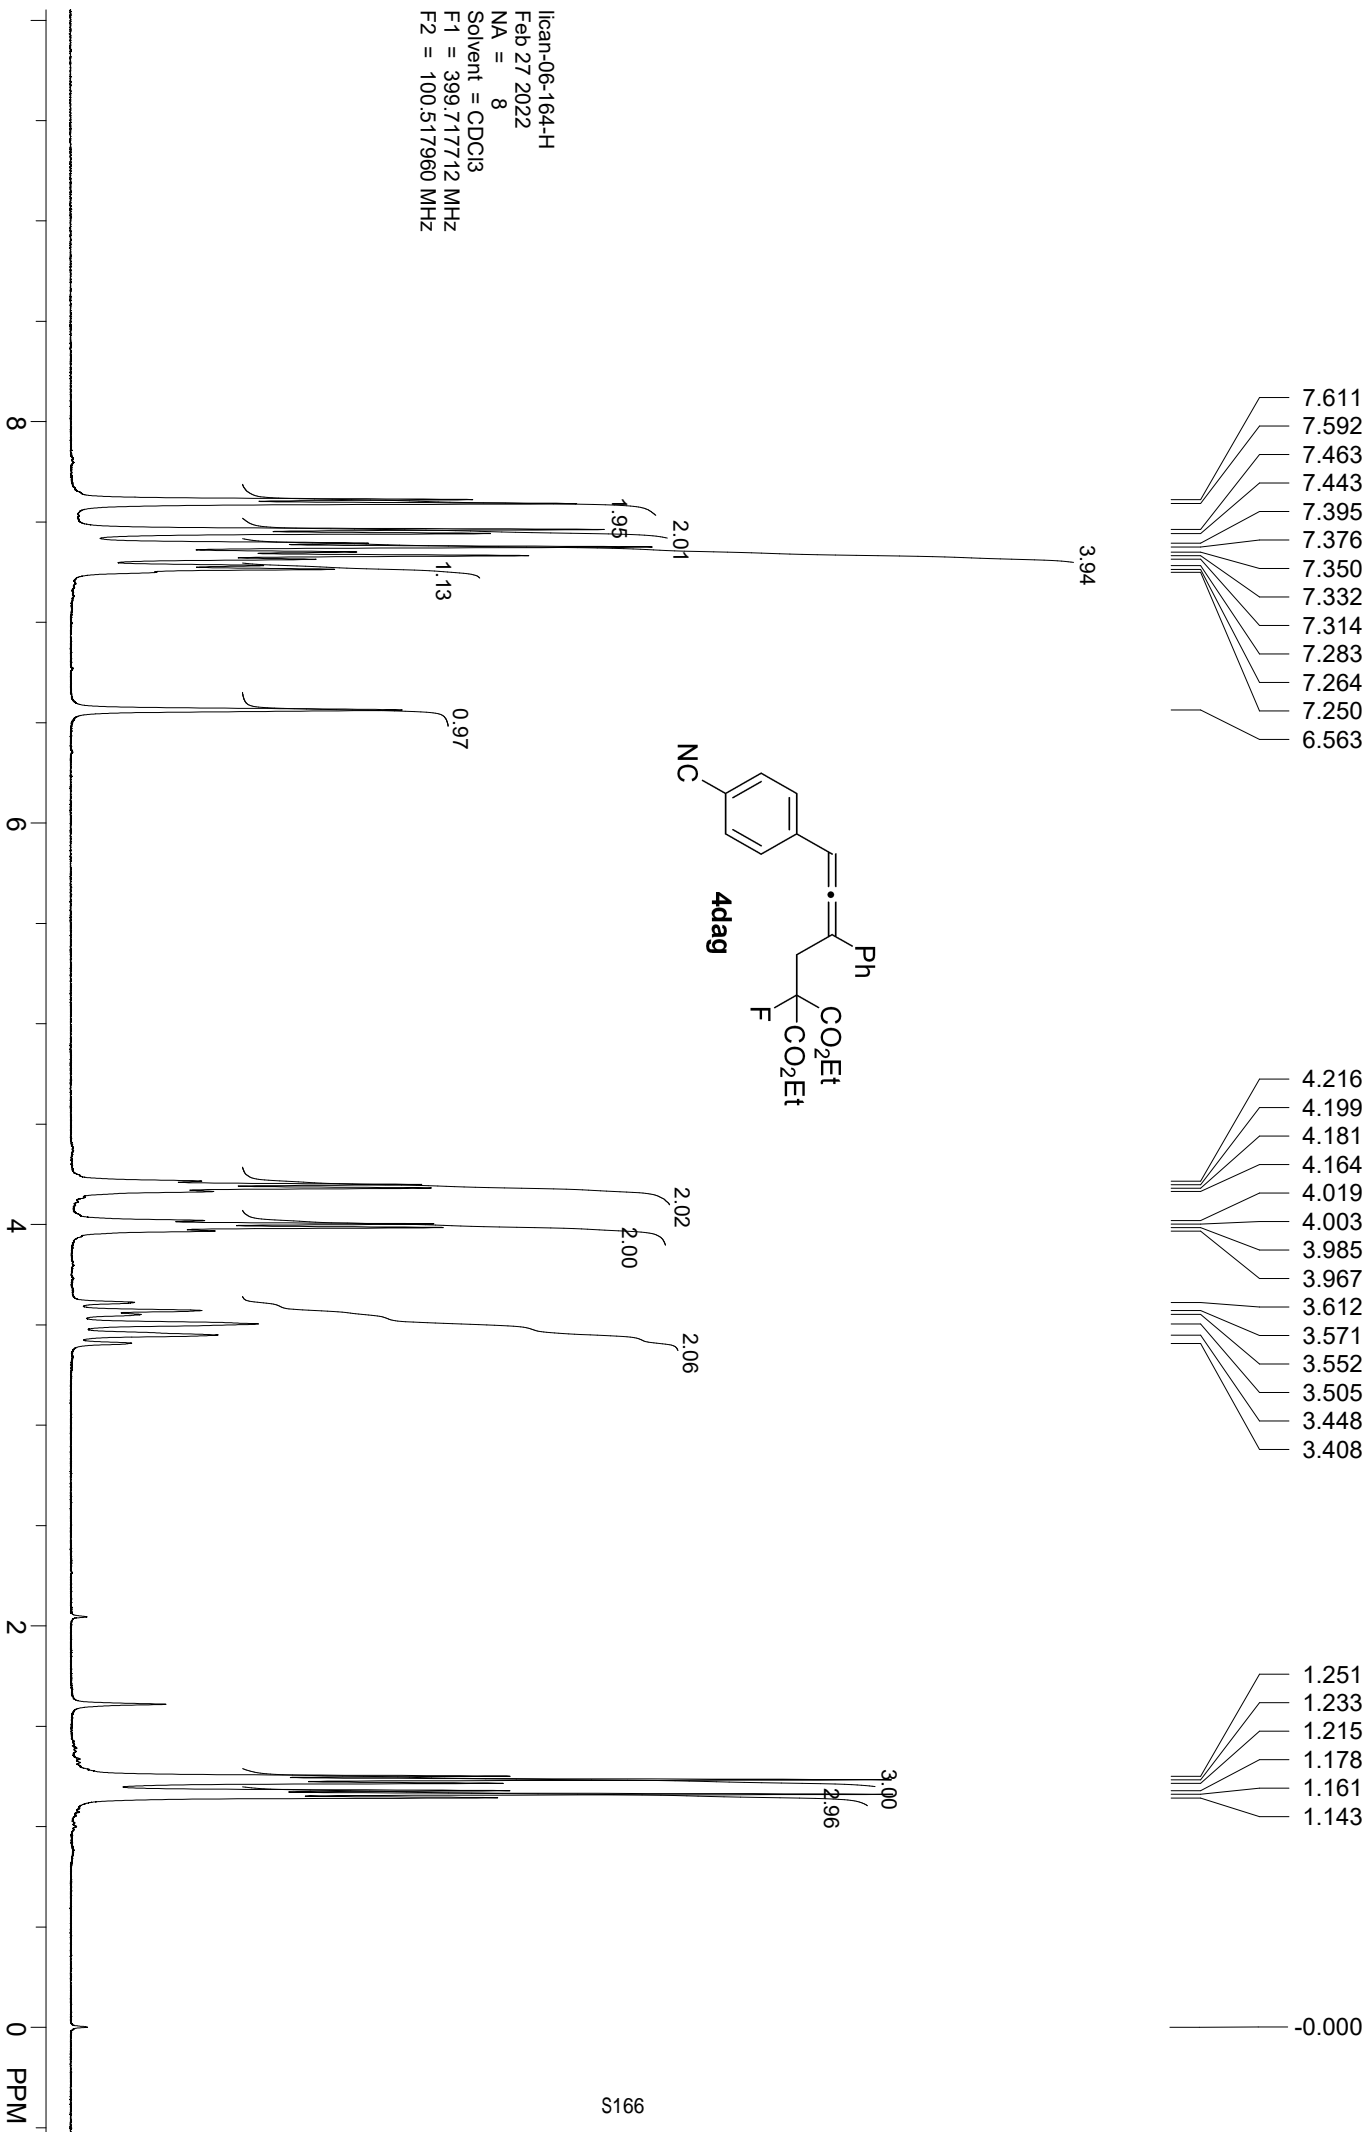

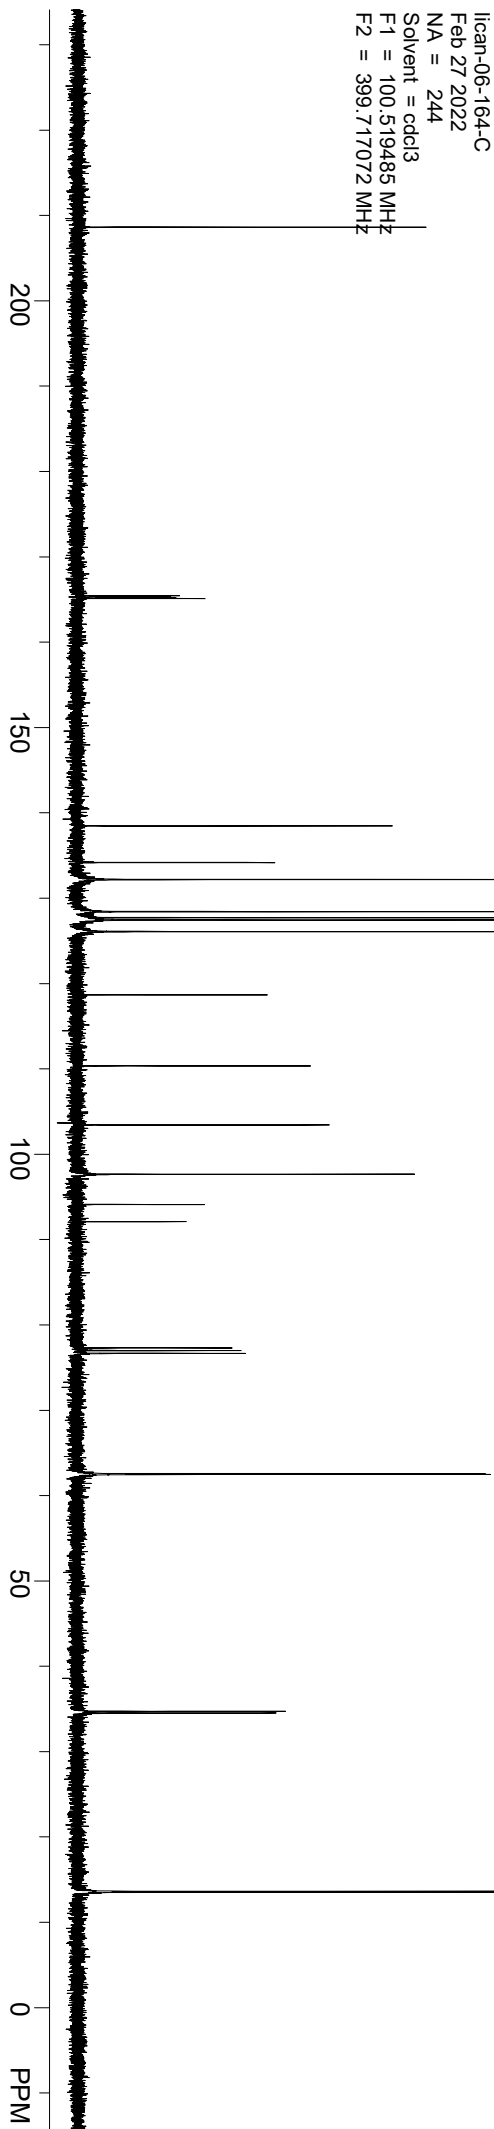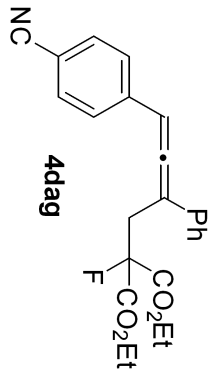

208.628

165.443  
 165.382  
 165.193  
 165.132

138.472  
 134.191  
 132.194  
 128.437  
 127.723  
 127.458  
 126.091  
 118.682

110.355

103.440

97.670  
 94.125  
 92.114

77.319  
 77.000  
 76.681

62.562  
 62.478

34.688  
 34.483

13.577  
 13.478

lican-06-164-F  
Feb 27 2022  
NA = 4  
Solvent = CDCl3  
F1 = 376.07136 MHz  
F2 = 100.517960 MHz

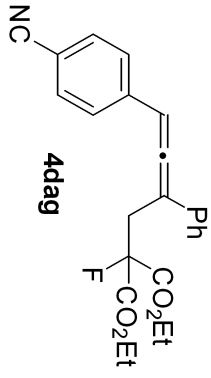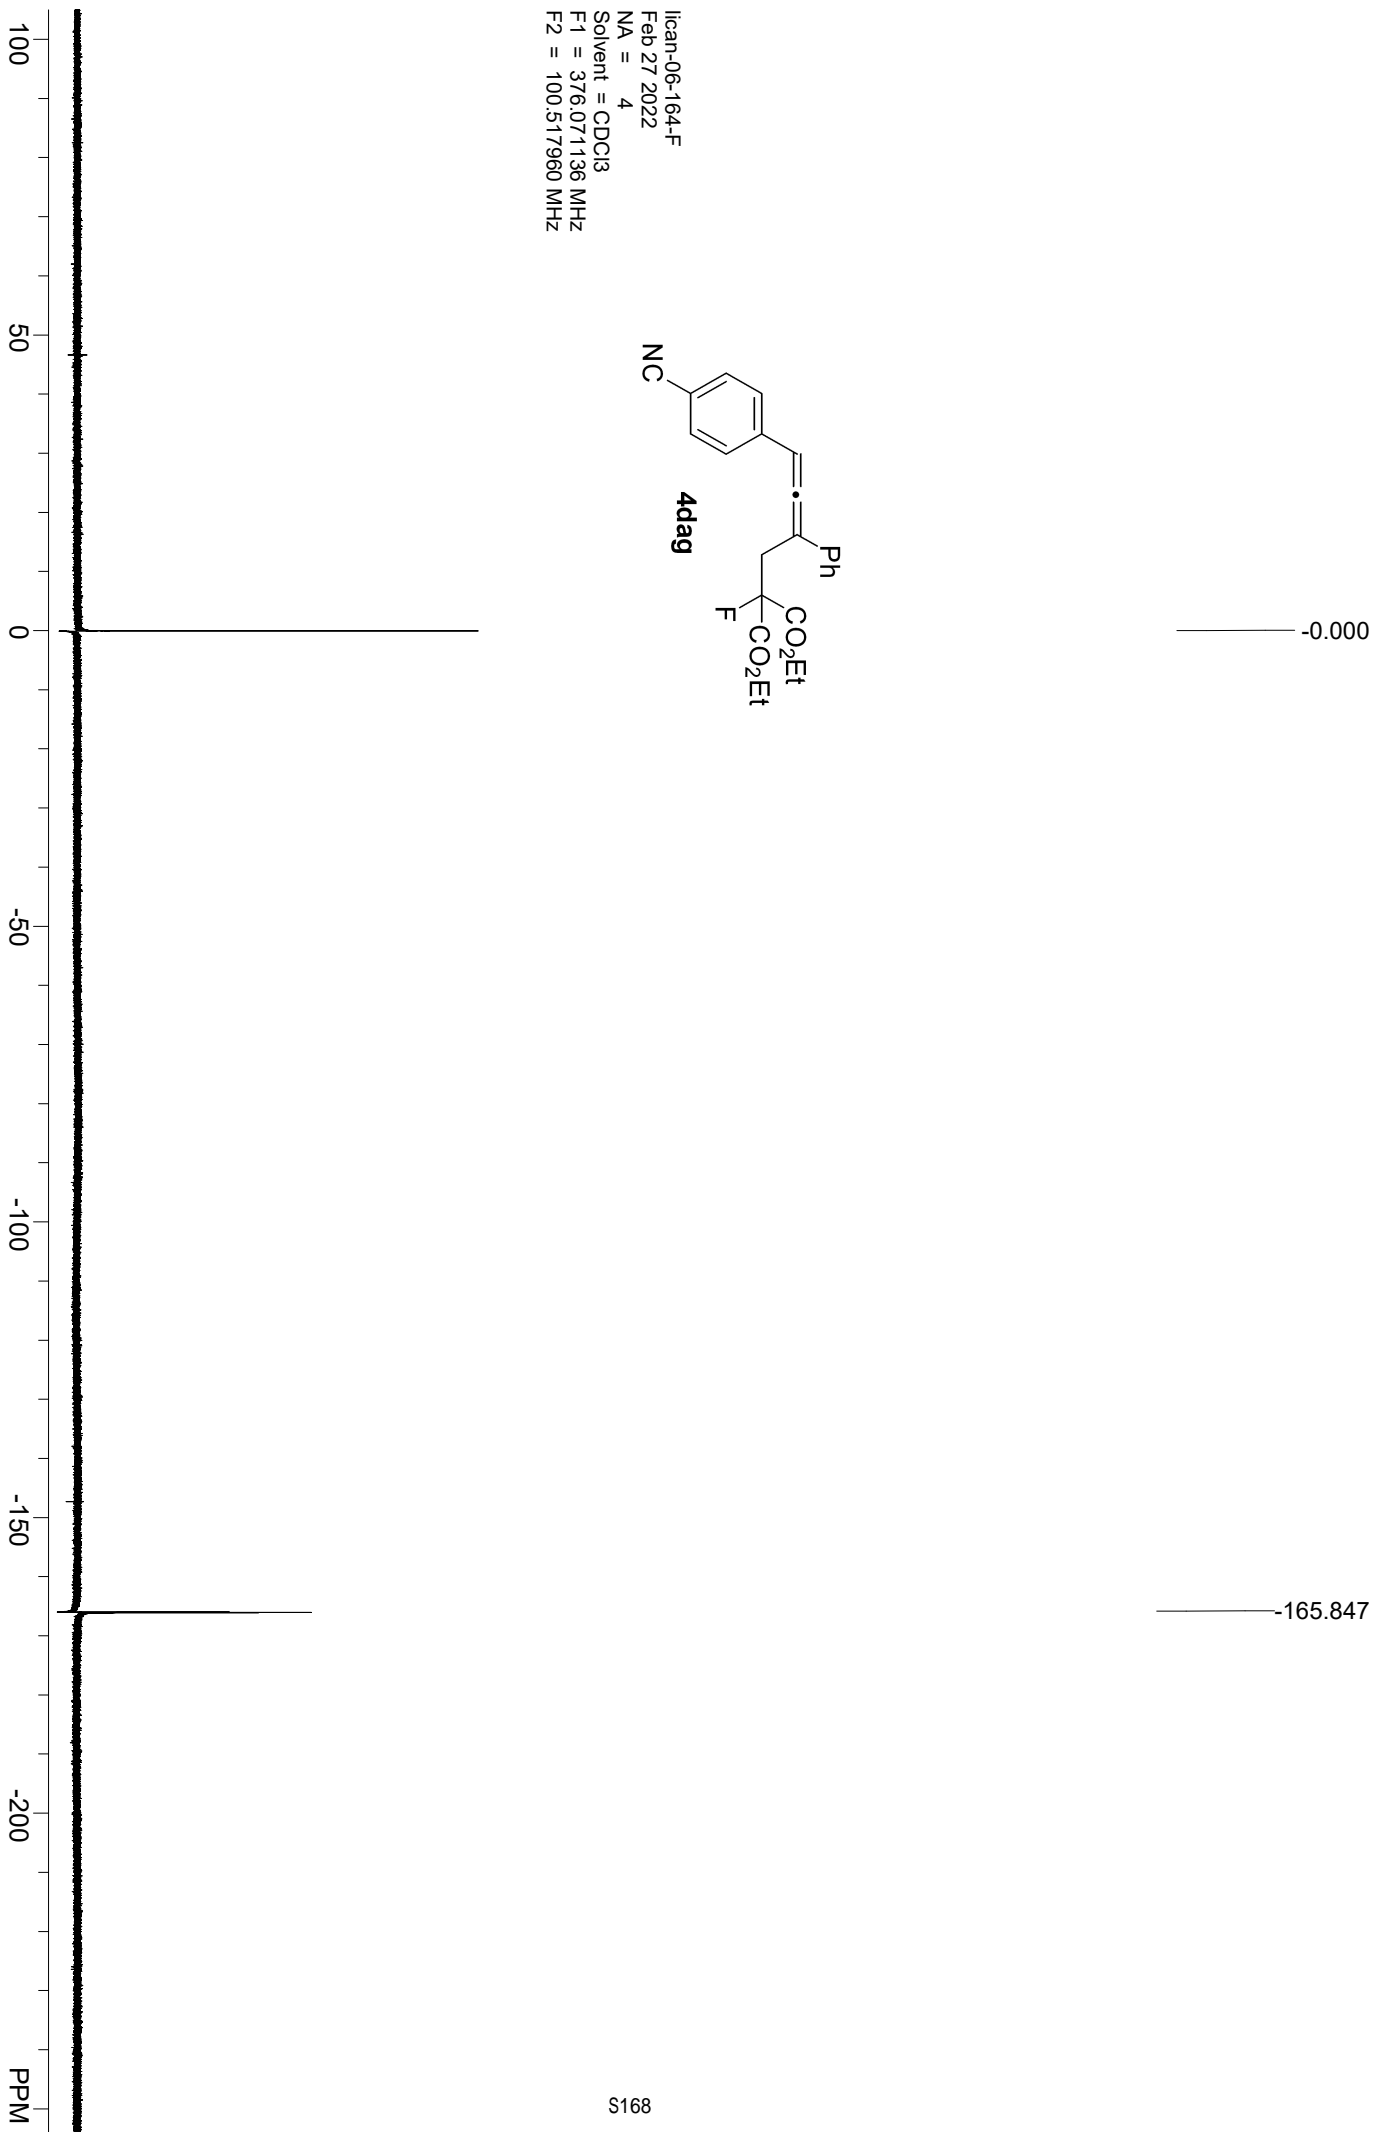



7.932  
7.914  
7.803  
7.793  
7.783  
7.776  
7.753  
7.727  
7.706  
7.637  
7.619  
7.600  
7.496  
7.476  
7.456  
7.439  
7.425  
7.361  
7.343  
7.331  
7.313  
7.293  
7.268  
7.248  
7.228  
7.208  
6.717  
6.709  
6.701  
4.929  
4.915  
4.903  
3.615  
3.606  
3.603  
3.594  
3.571  
3.562  
3.560  
3.550  
3.477  
3.467  
3.463  
3.454  
3.433  
3.424  
3.419  
3.410  
-0.000

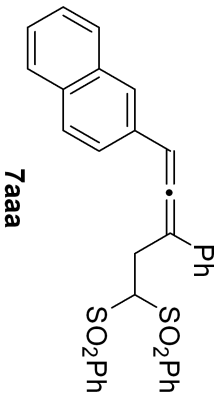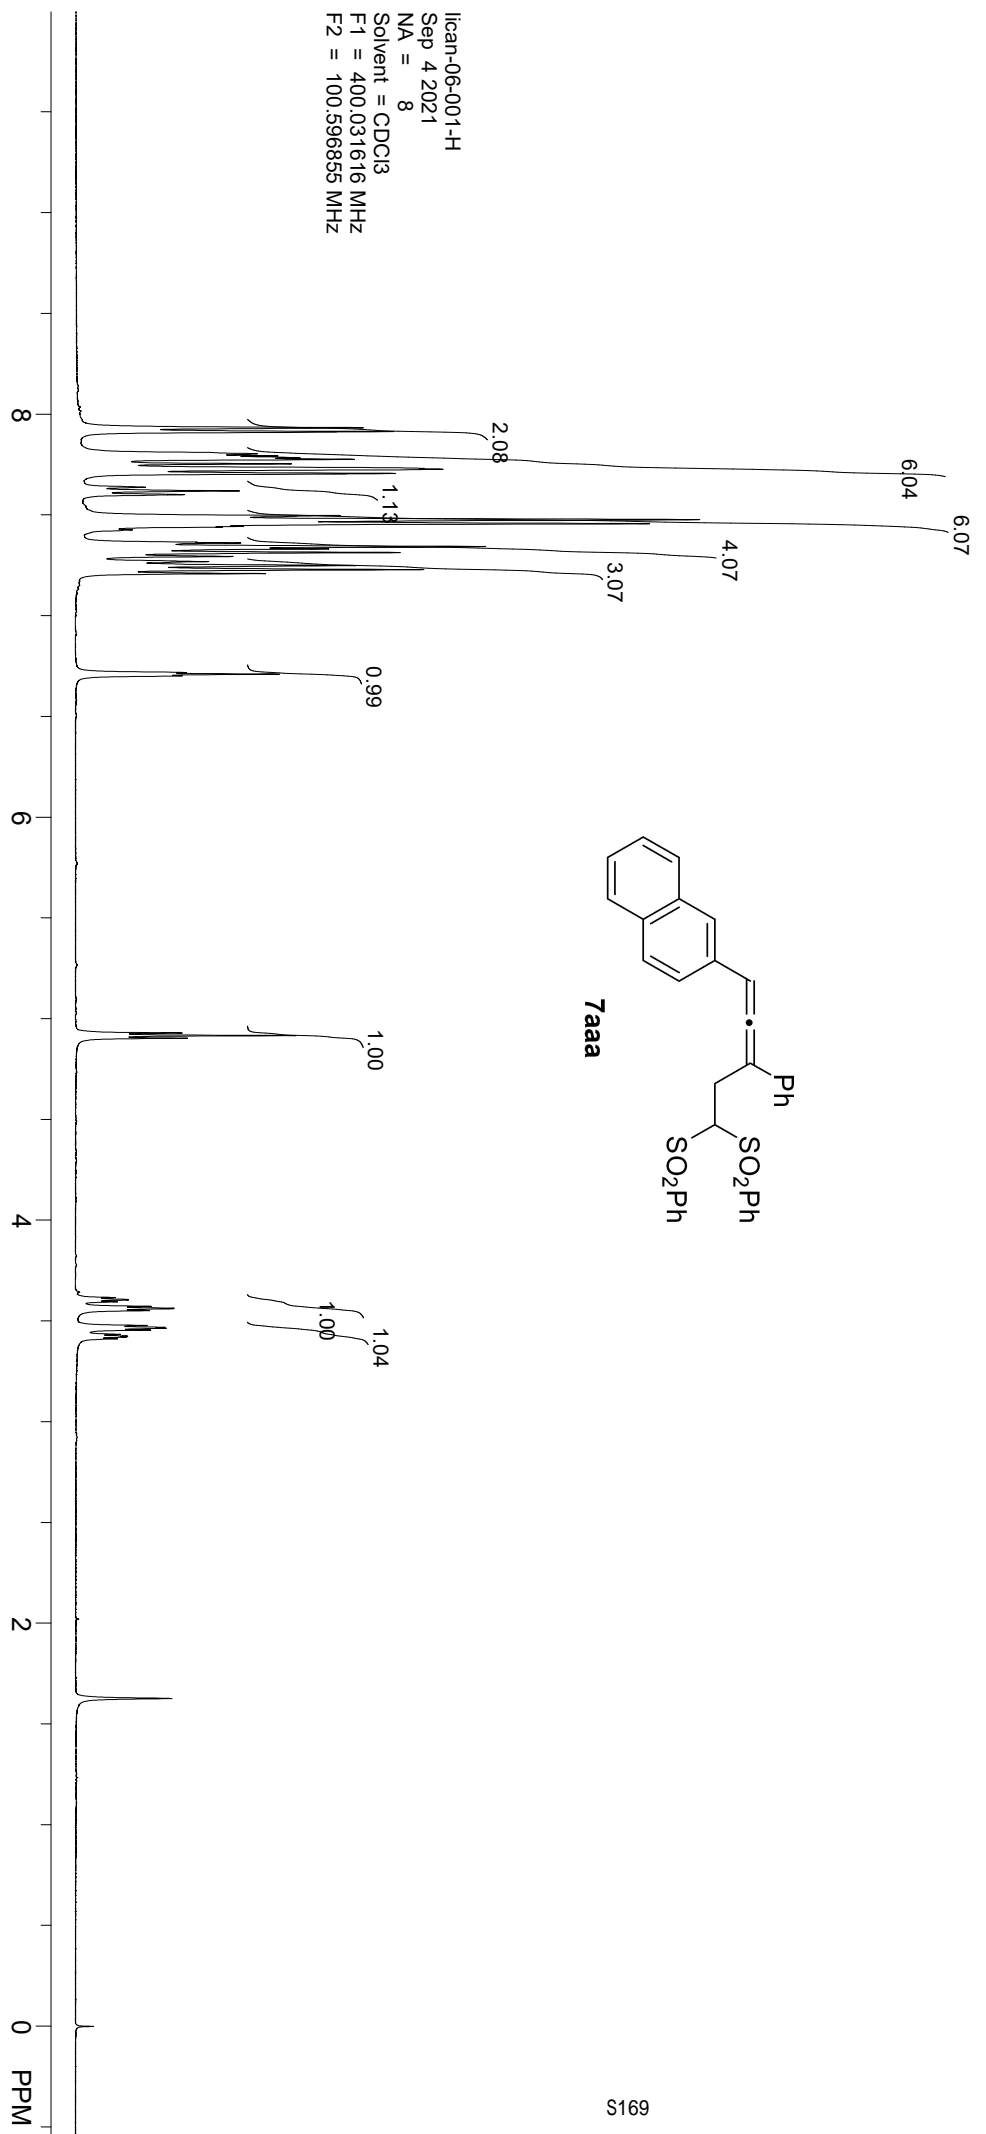

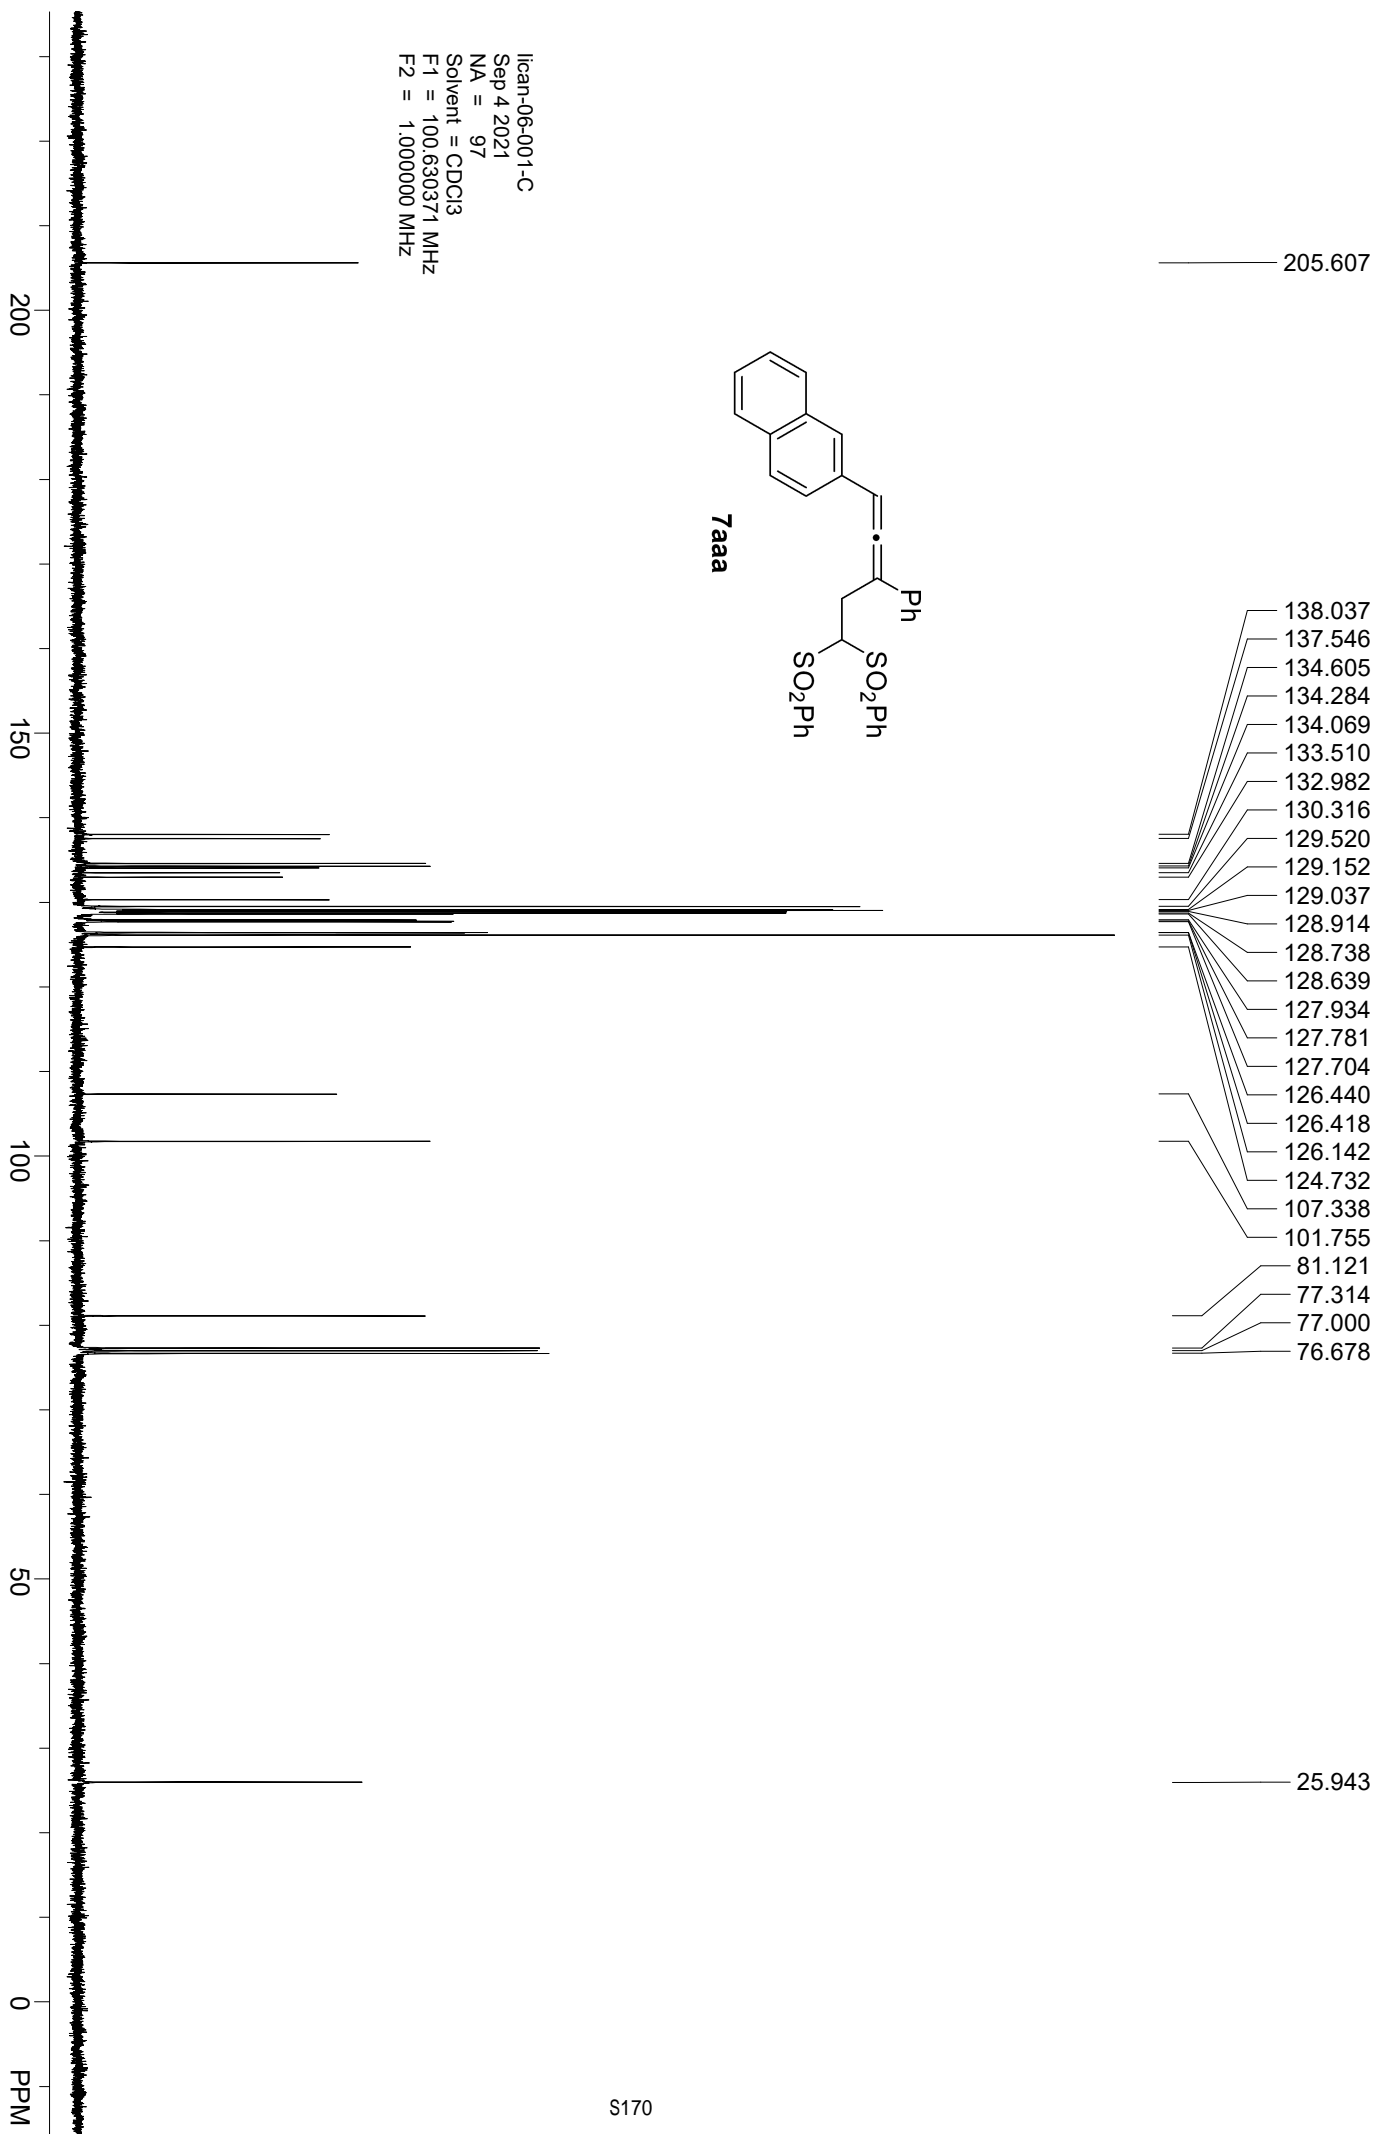

- 7.790
- 7.773
- 7.768
- 7.762
- 7.744
- 7.723
- 7.507
- 7.504
- 7.485
- 7.482
- 7.465
- 7.451
- 7.448
- 7.439
- 7.434
- 7.428
- 7.420
- 7.416
- 7.402
- 7.399
- 7.381
- 7.305
- 7.285
- 7.281
- 7.260
- 7.243
- 7.237
- 7.229
- 7.213
- 7.195
- 6.743
- 3.745
- 3.711
- 3.676
- 3.669
- 3.642
- 3.628
- 3.622
- 3.608
- 3.594
- 3.588

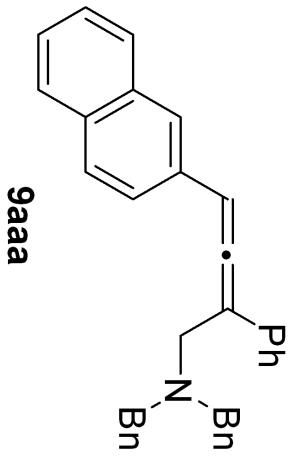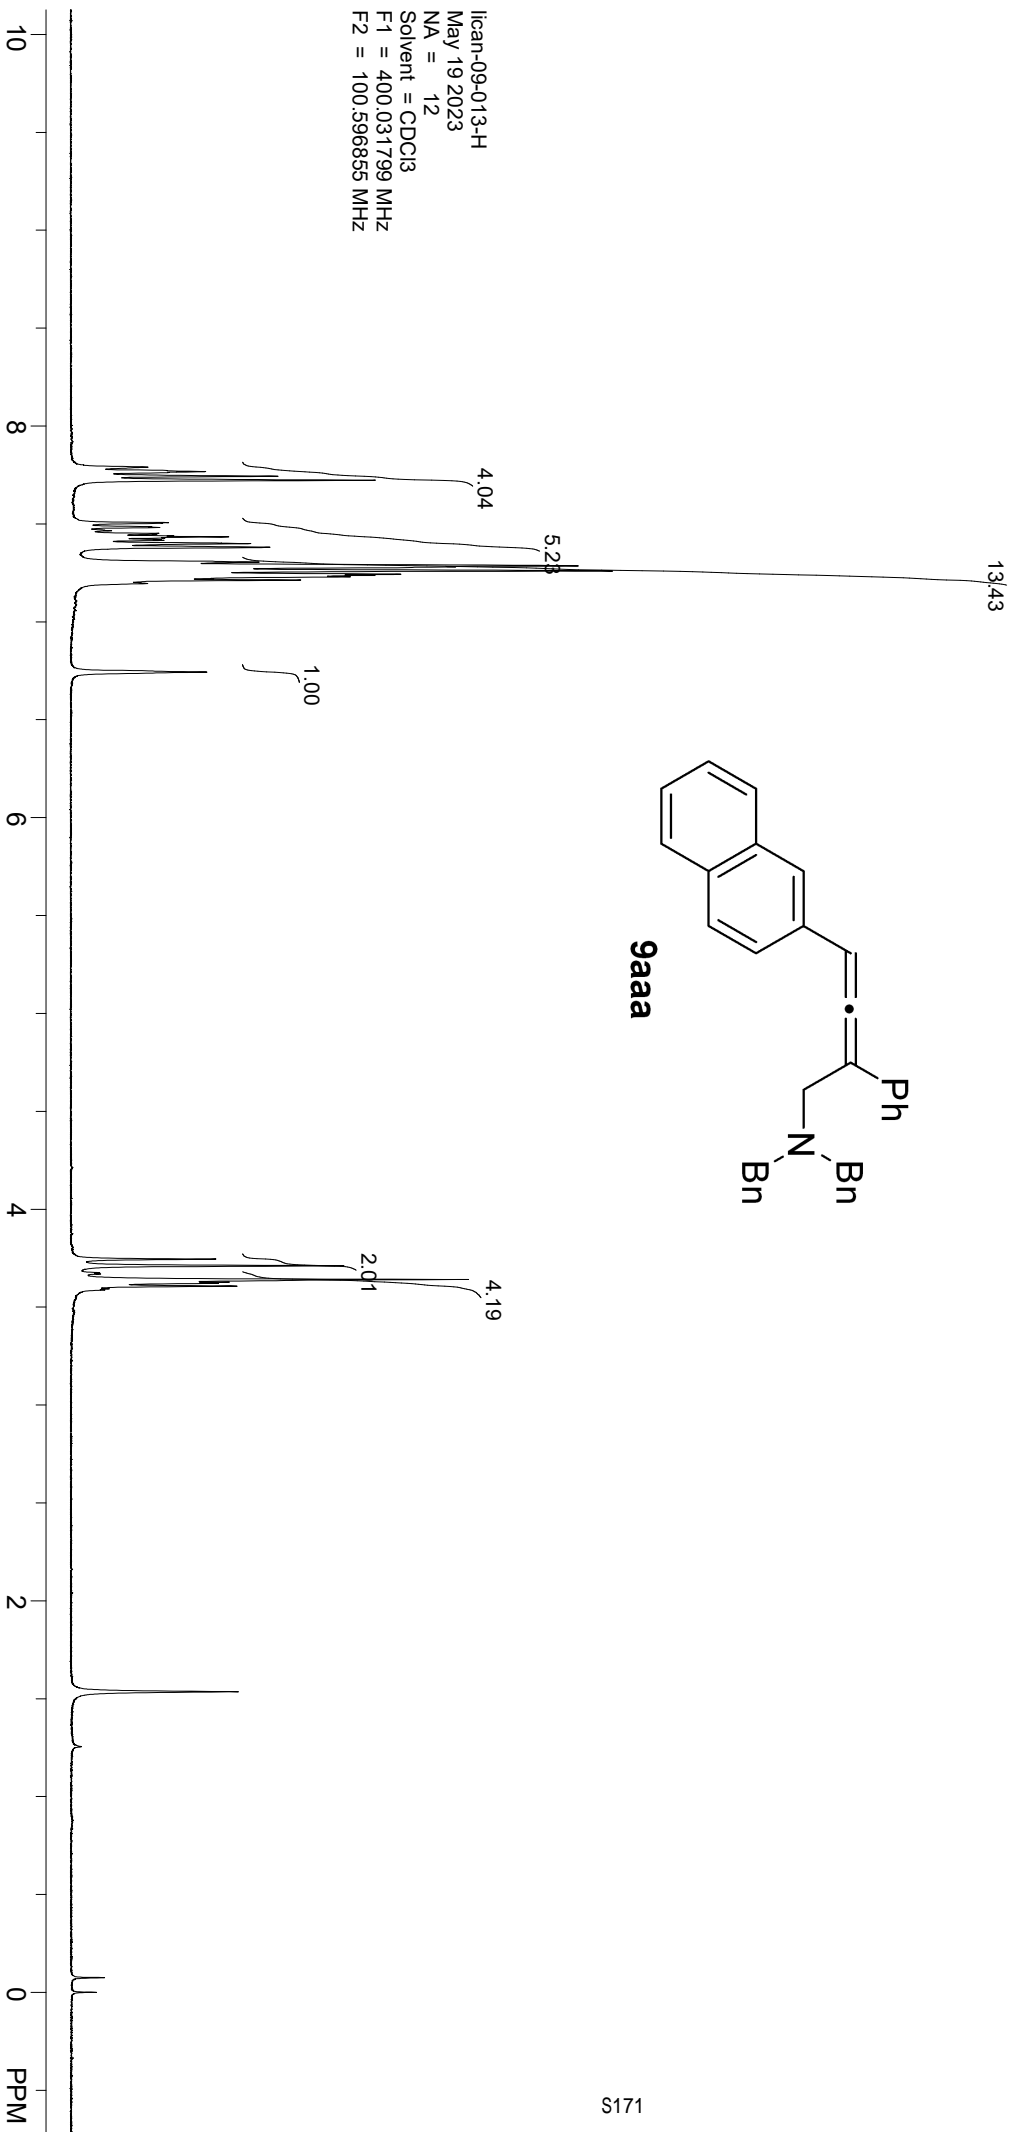

lican-09-013-C  
May 19 2023  
NA = 176  
Solvent = cdcl3  
F1 = 100.599396 MHz  
F2 = 400.030792 MHz

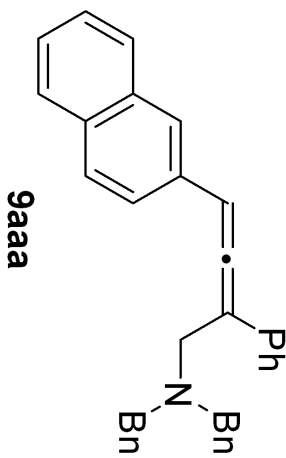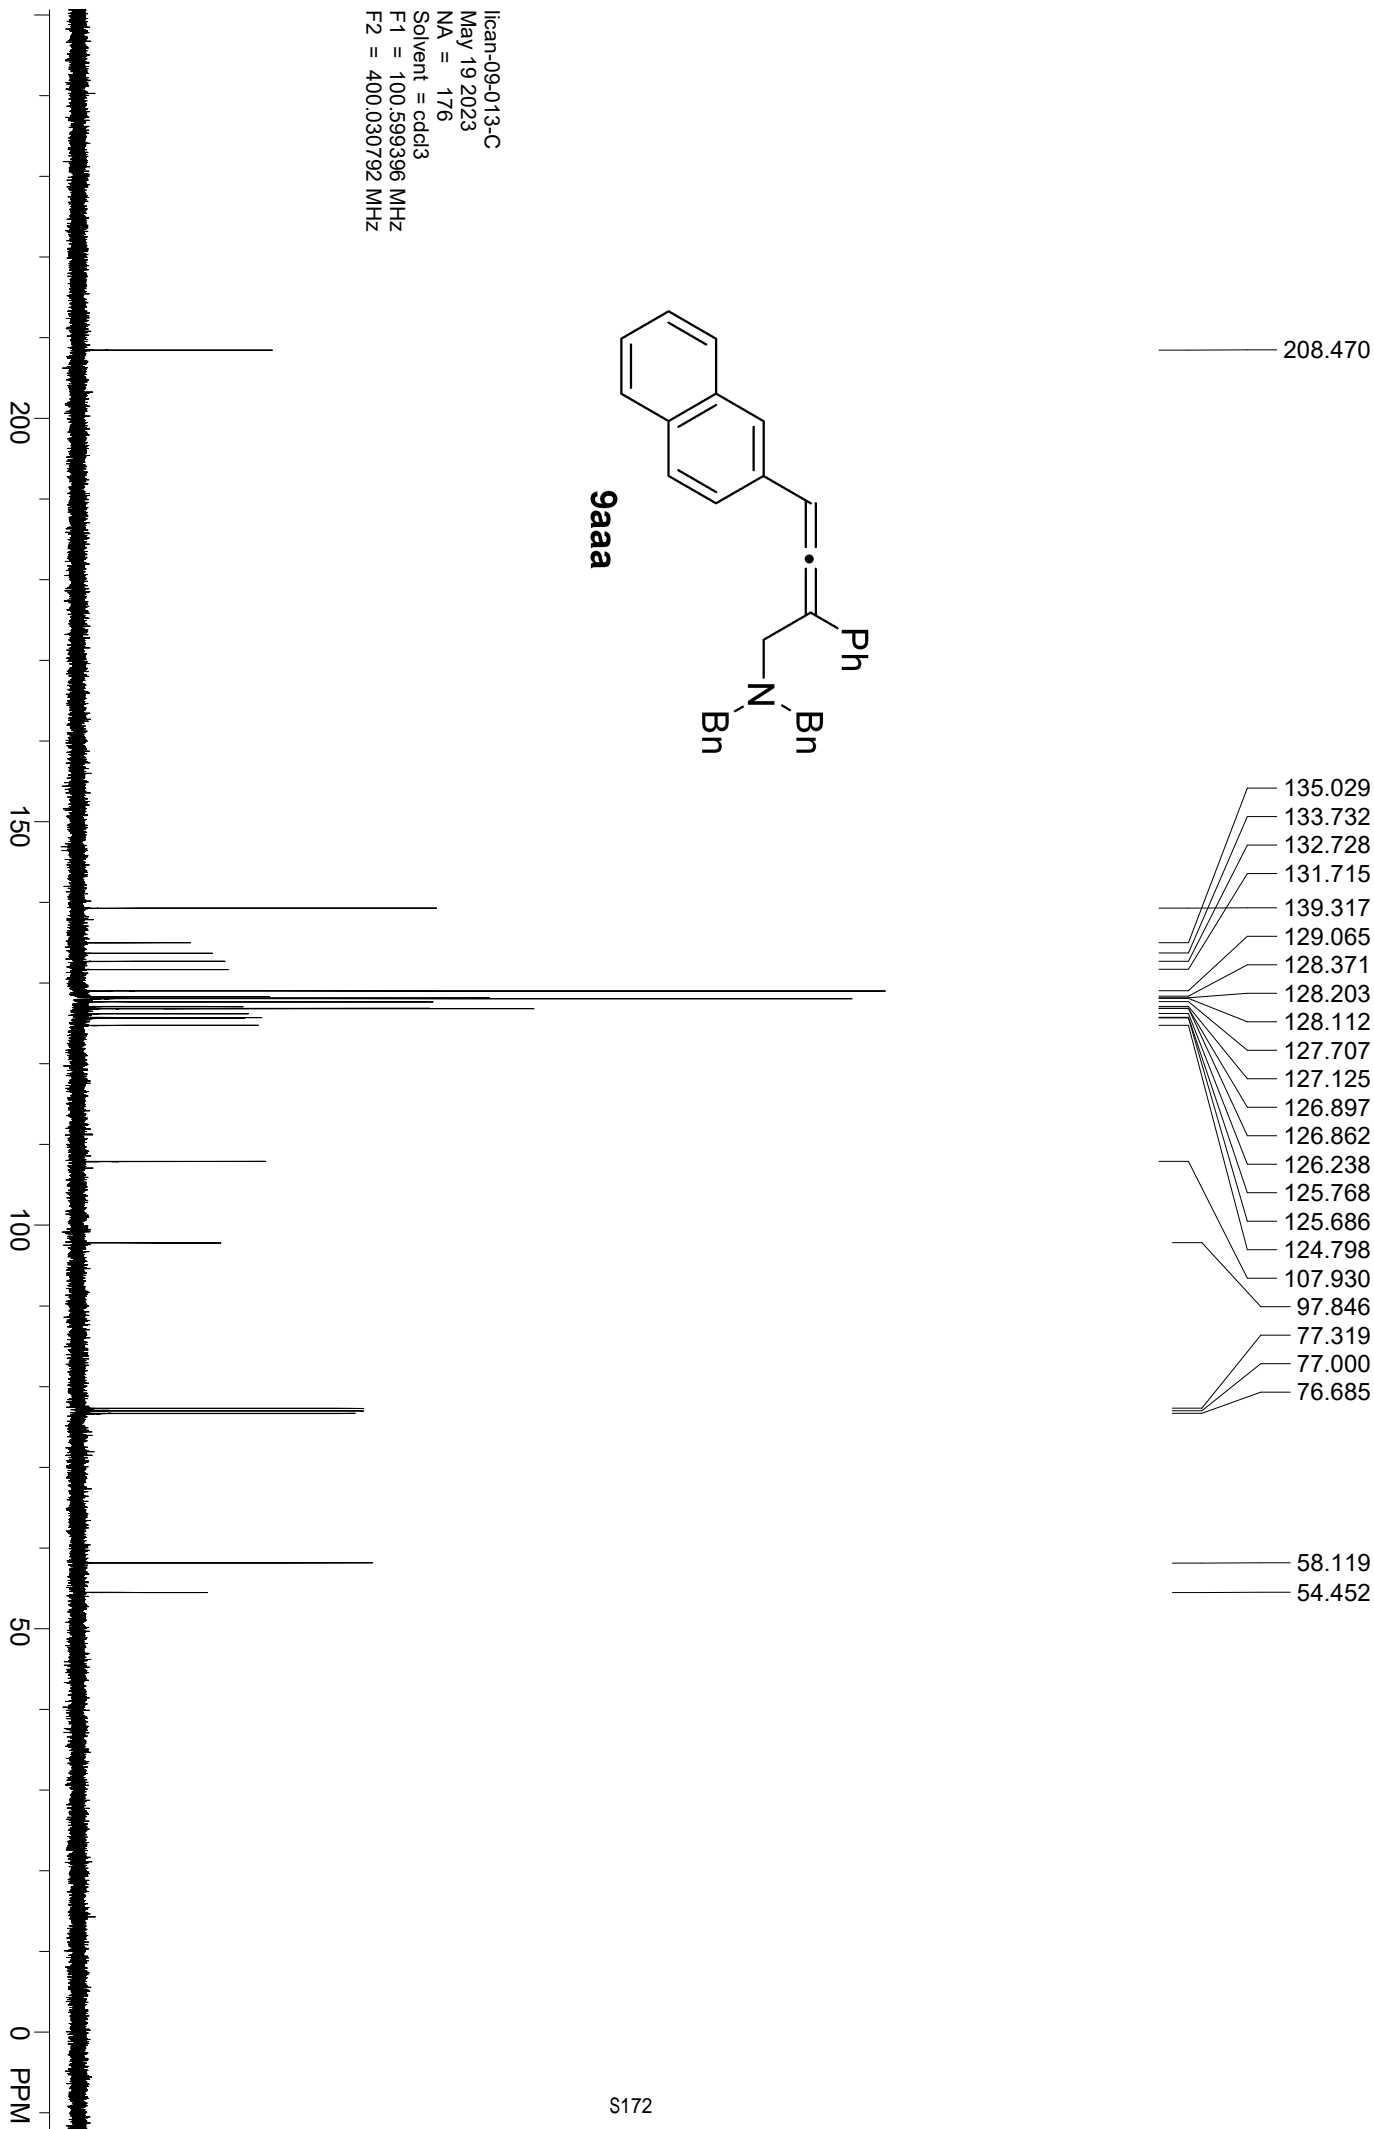

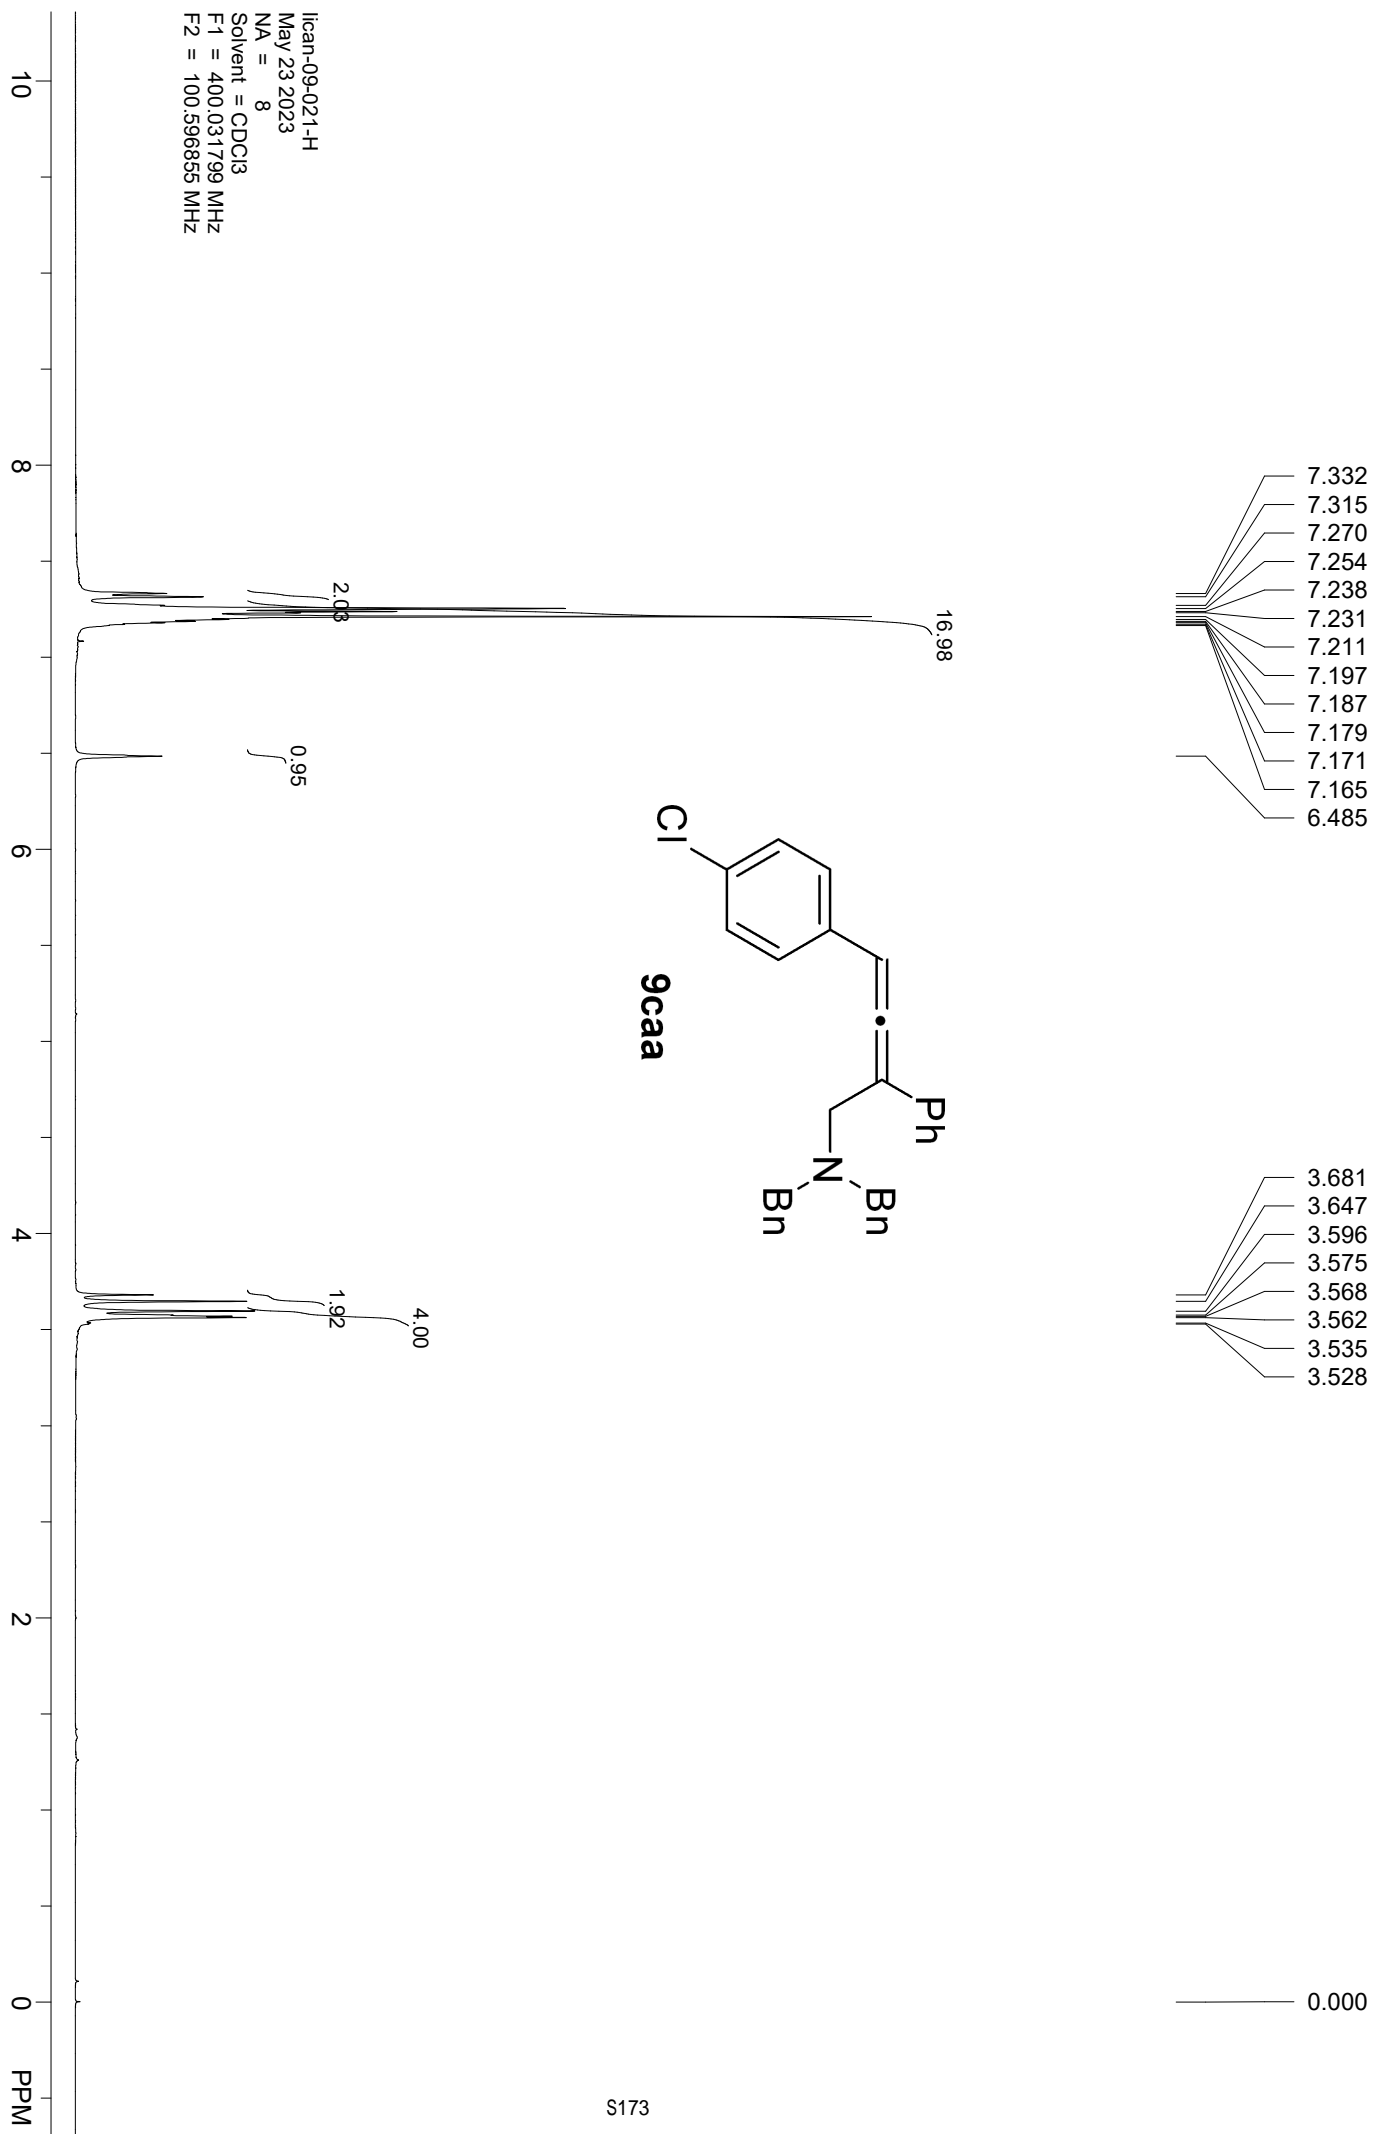

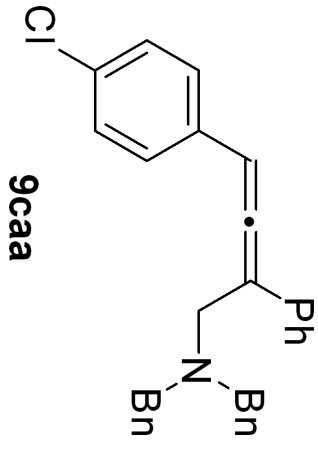

lican-09-021-C  
May 23 2023  
NA = 80  
Solvent = cdcl3  
F1 = 100.599396 MHz  
F2 = 400.030792 MHz

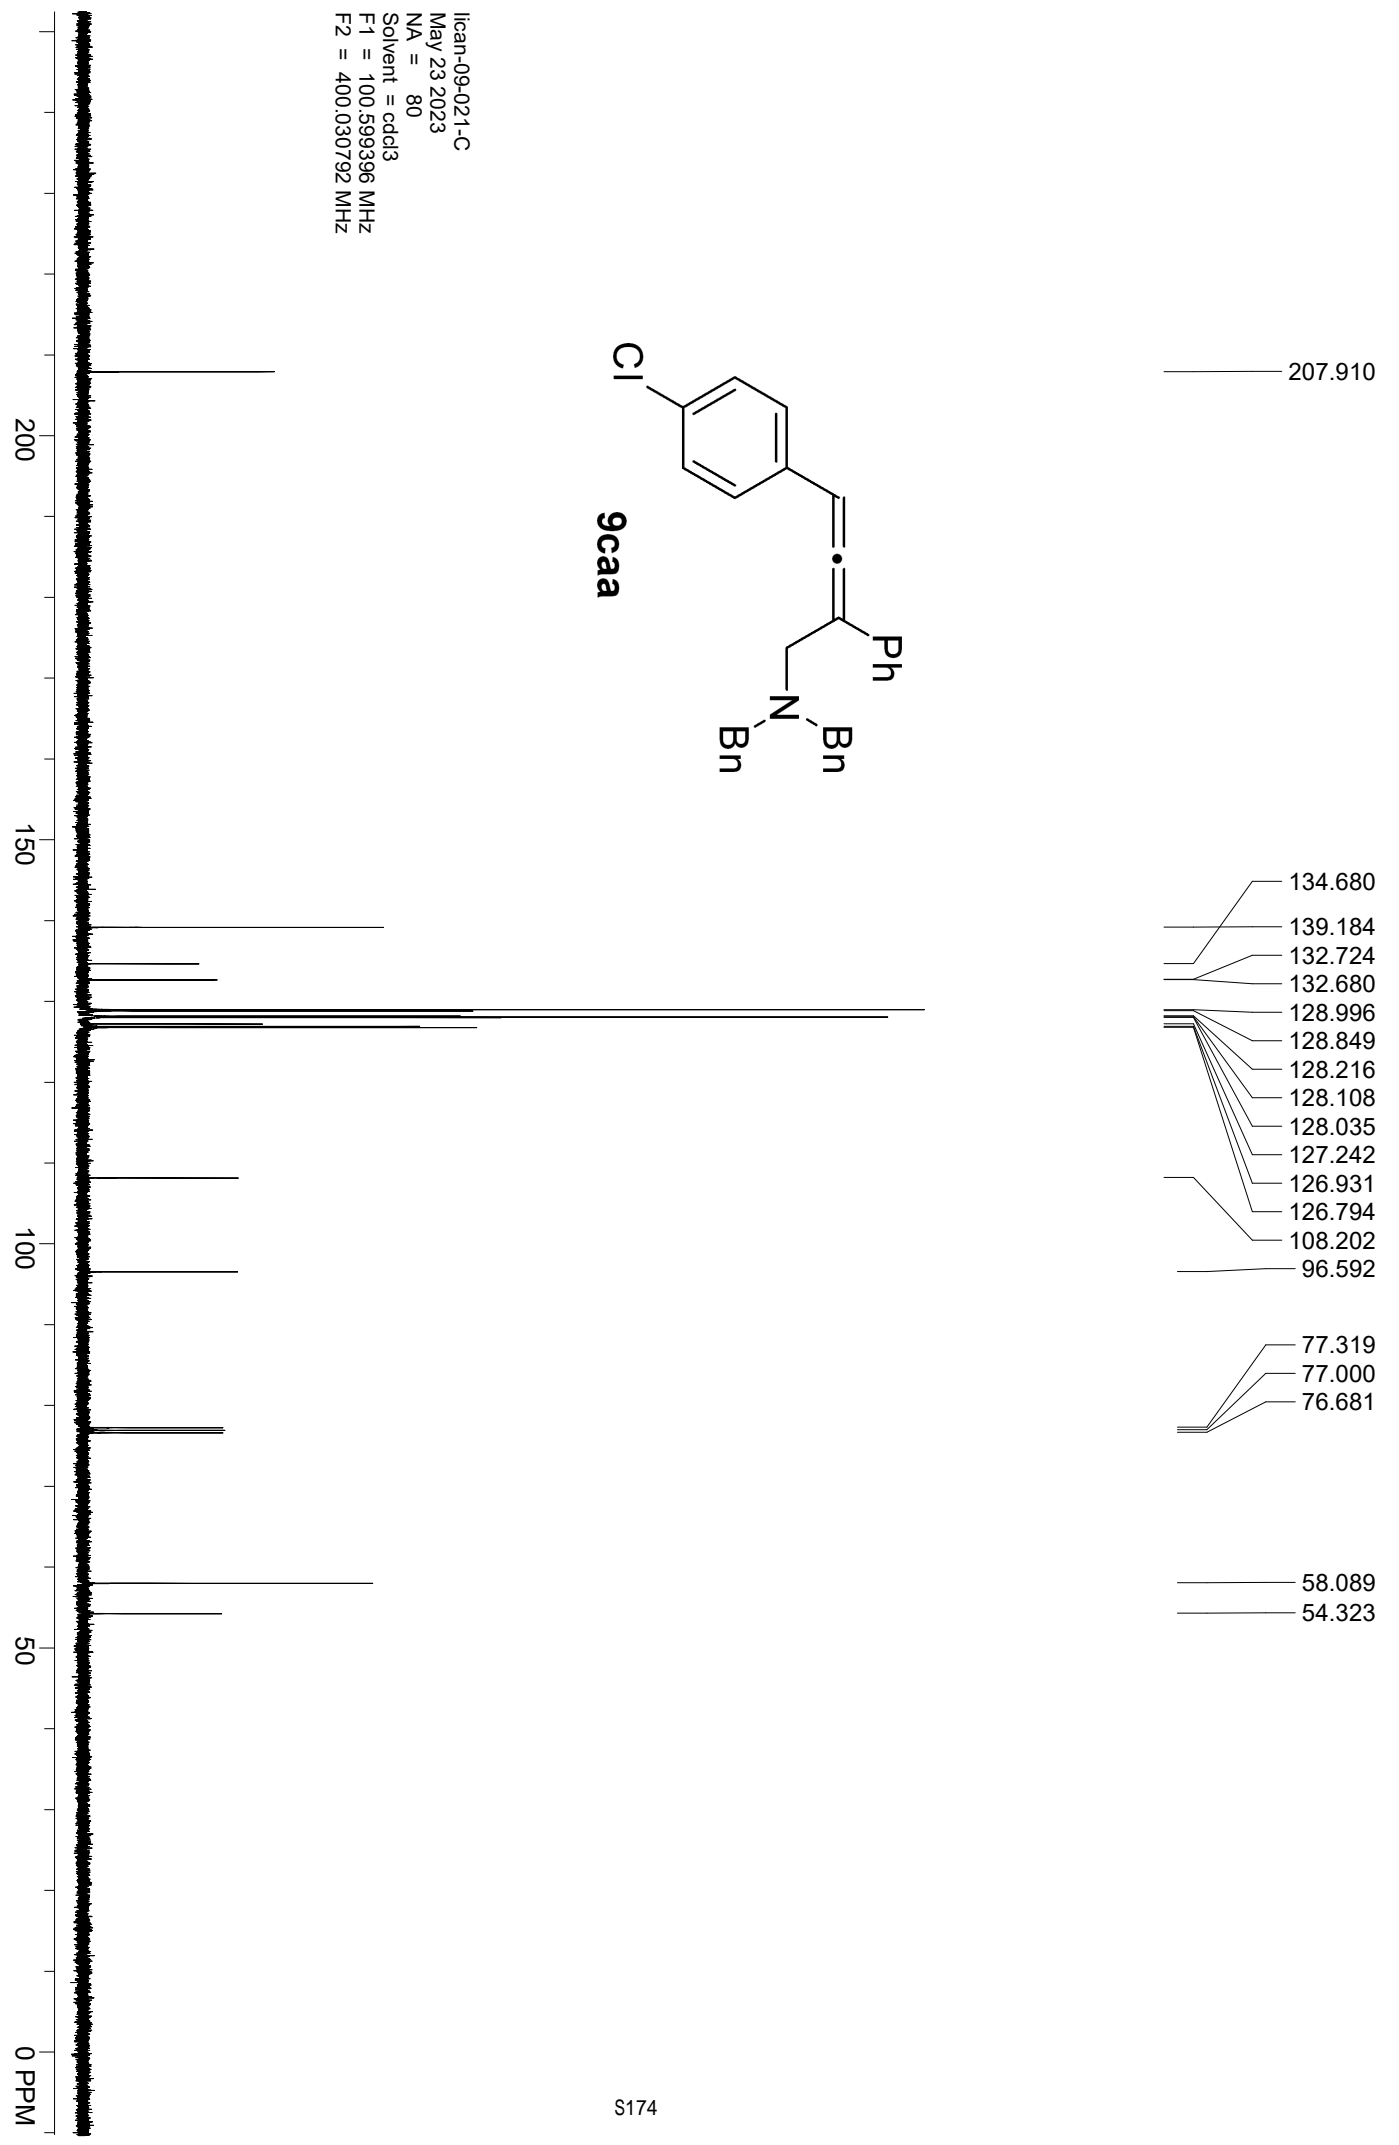

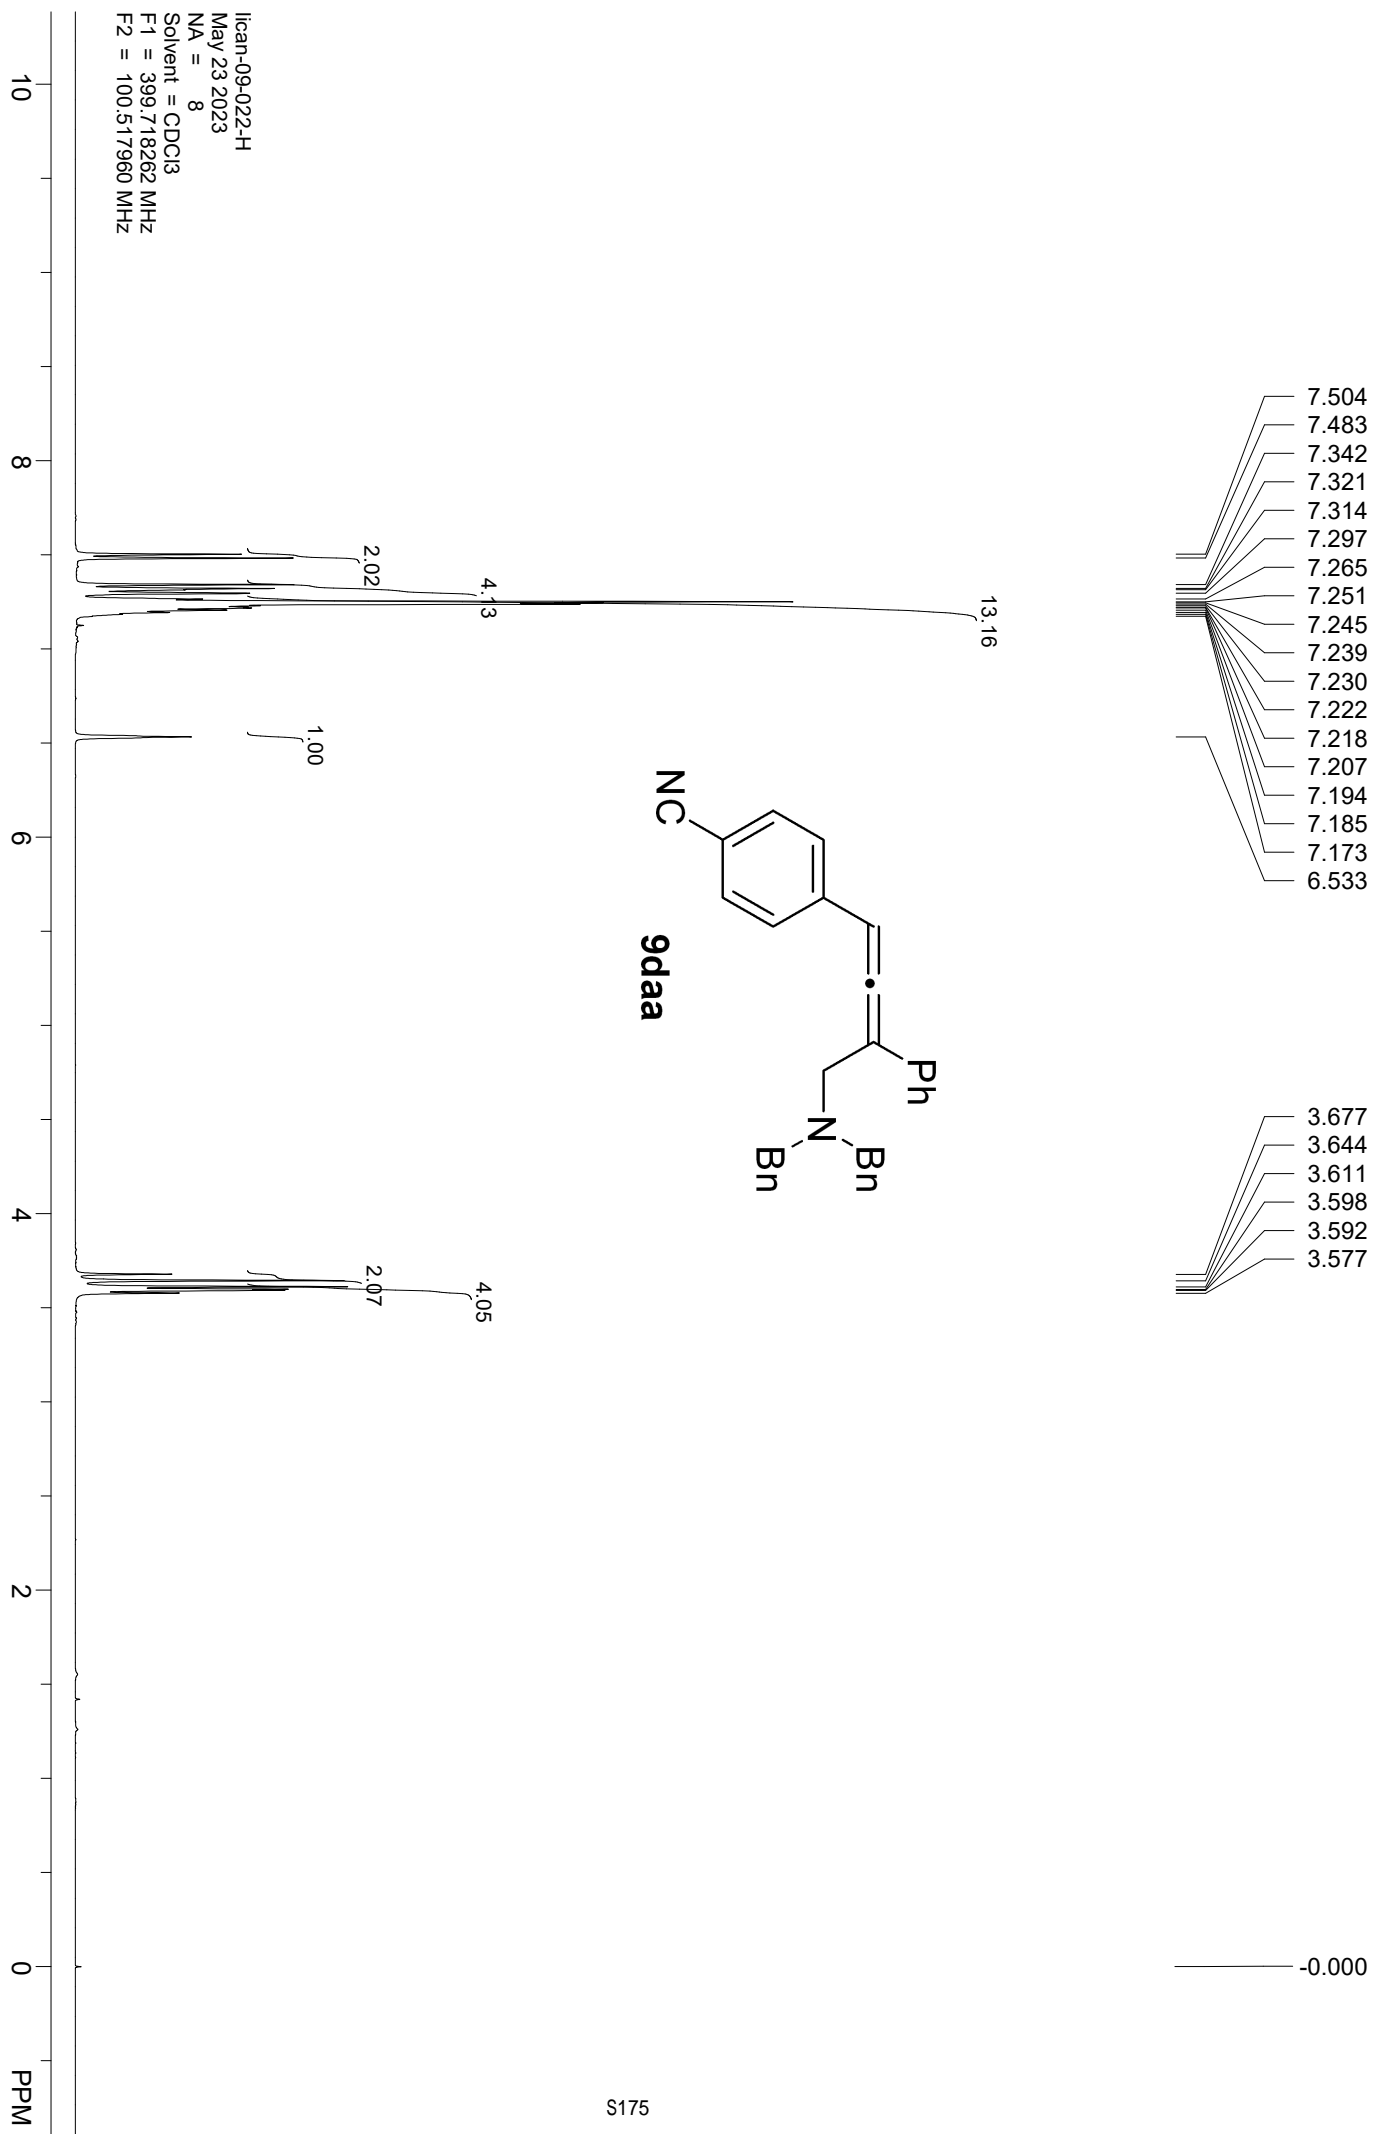

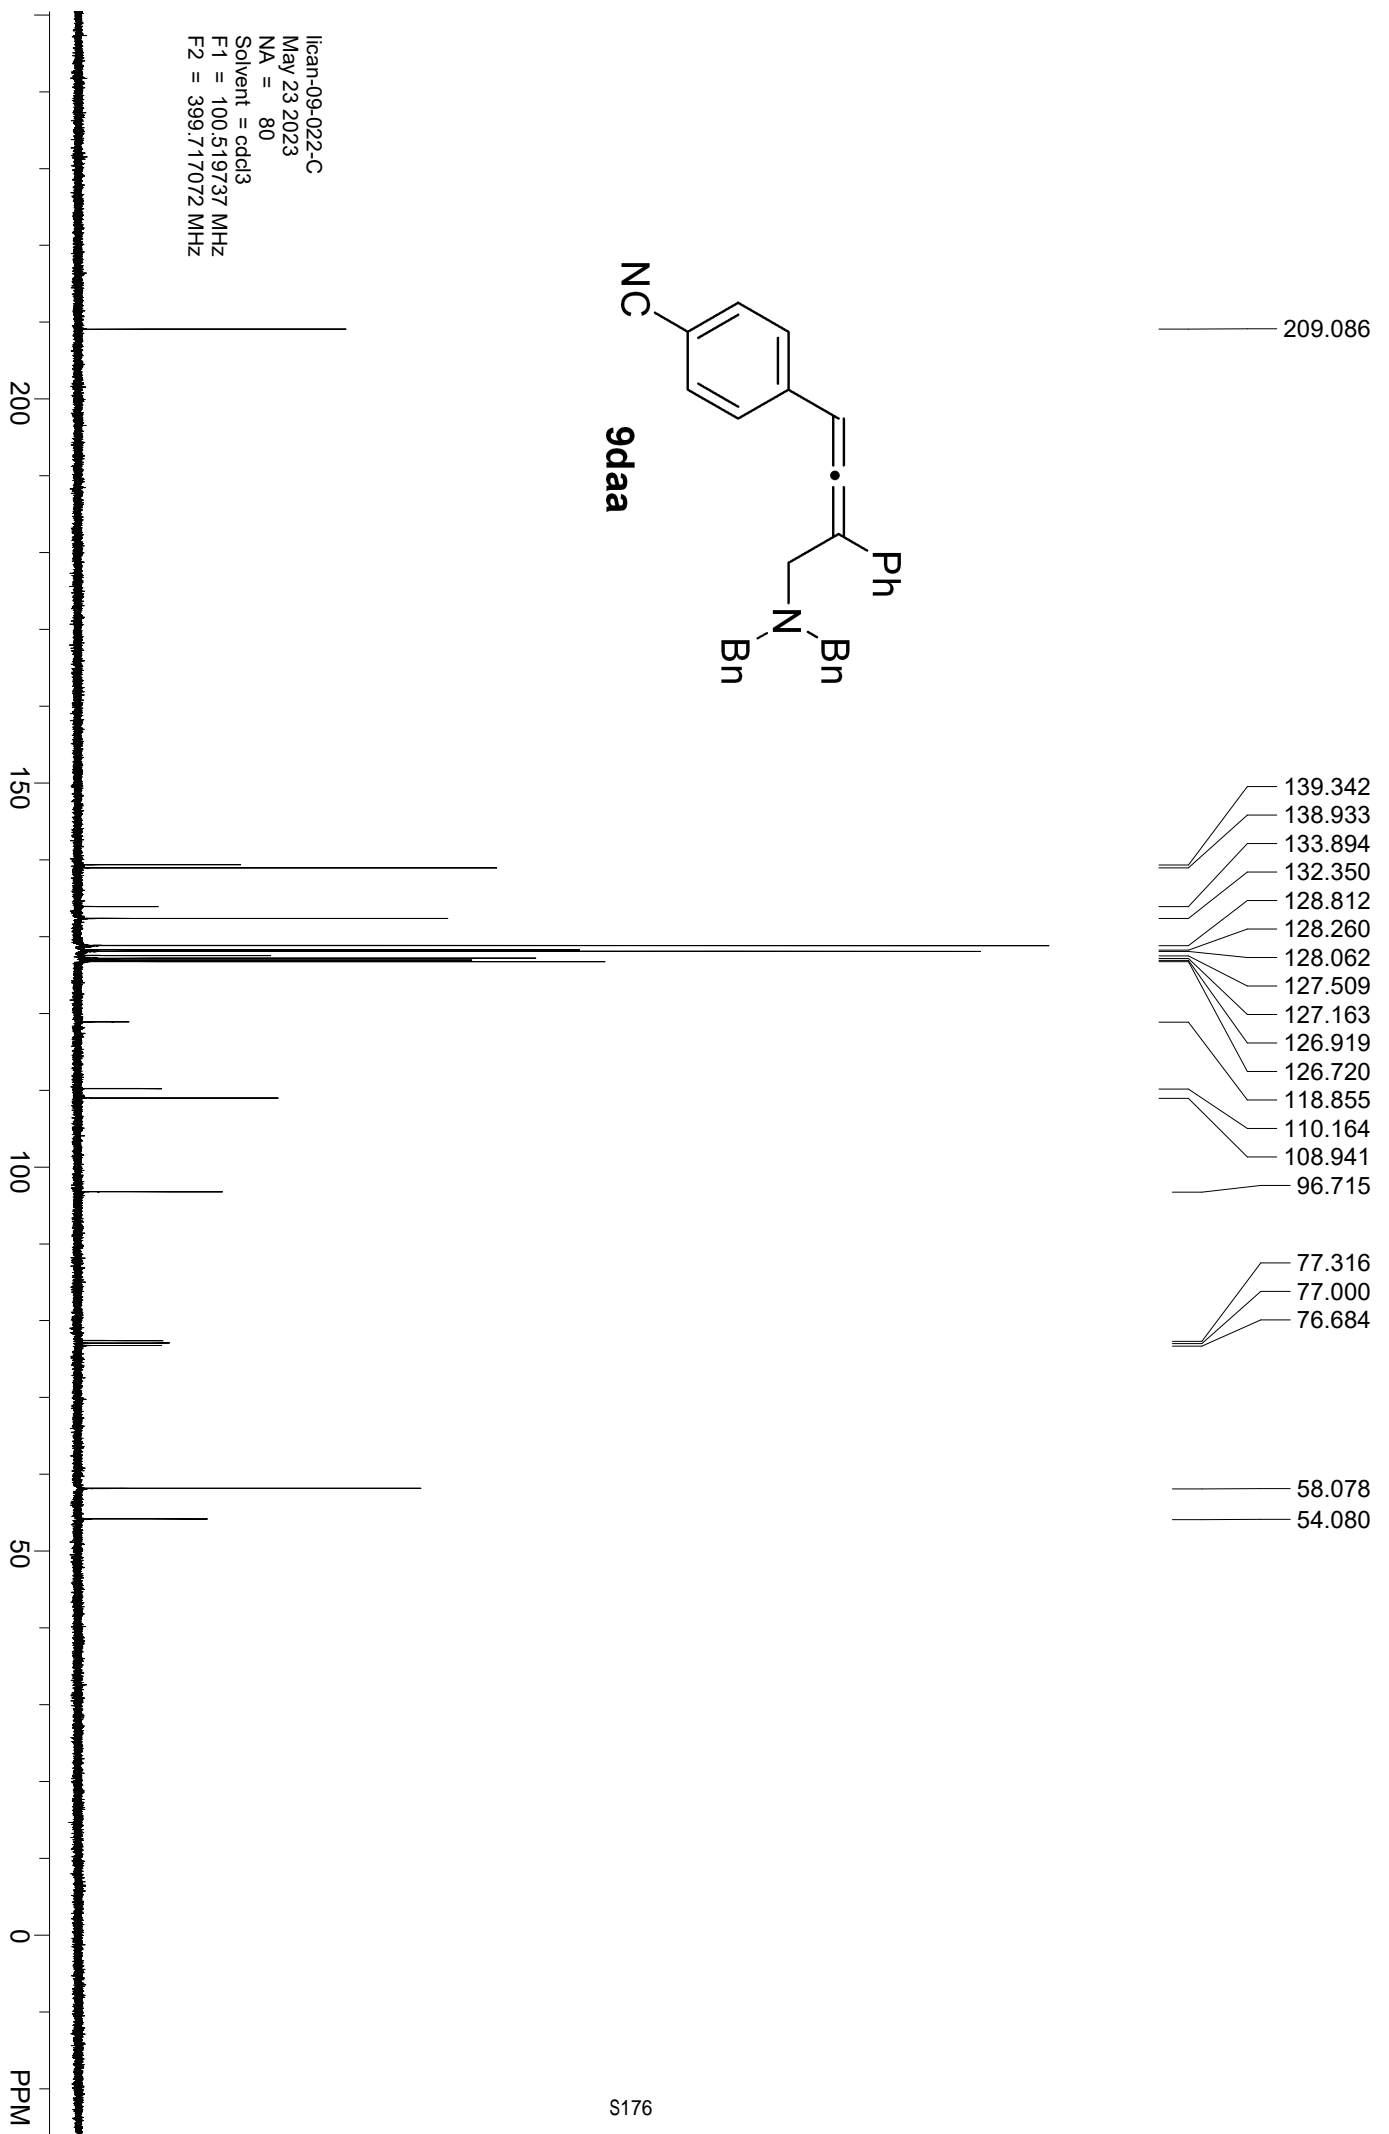



- 7.375
- 7.355
- 7.336
- 7.316
- 7.297
- 7.273
- 7.255
- 7.242
- 7.231
- 7.221
- 7.215
- 7.196
- 7.176
- 7.158
- 7.141
- 6.889
- 6.868
- 6.498
- 4.974

- 3.685
- 3.651
- 3.590
- 3.568
- 3.556
- 3.518
- 3.513

-0.000

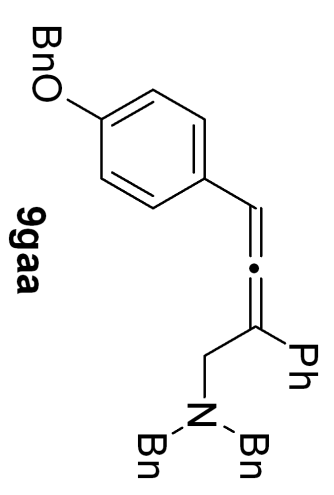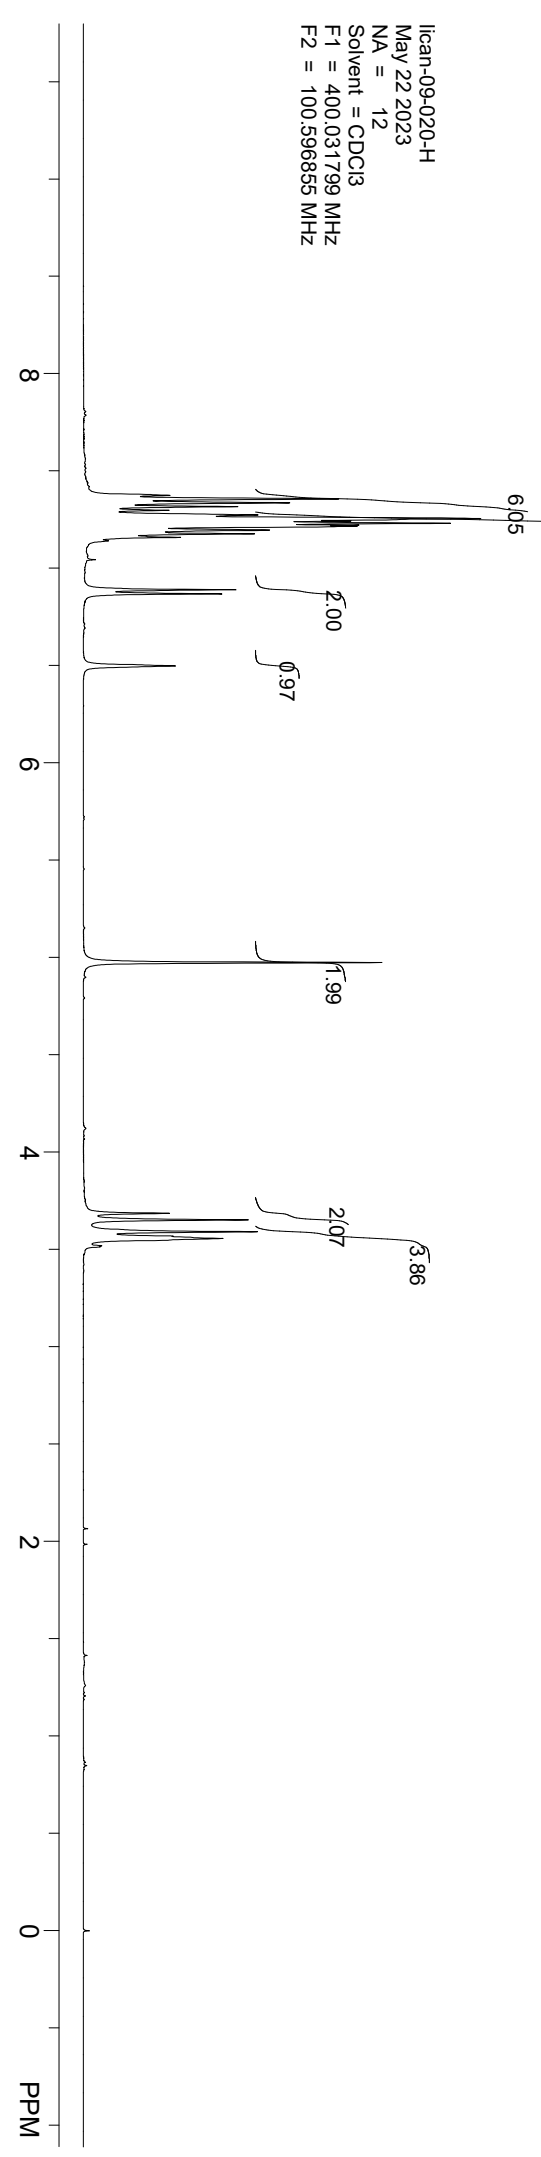

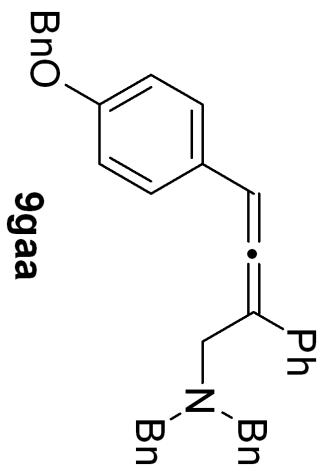

lican-09-020-purity  
 May 23 2023  
 purity = 97%  
 29.2 mg product with 7.0 uL dibromomethane  
 NA = 4  
 Solvent = cdcl3  
 F1 = 400.031403 MHz  
 F2 = 100.596855 MHz

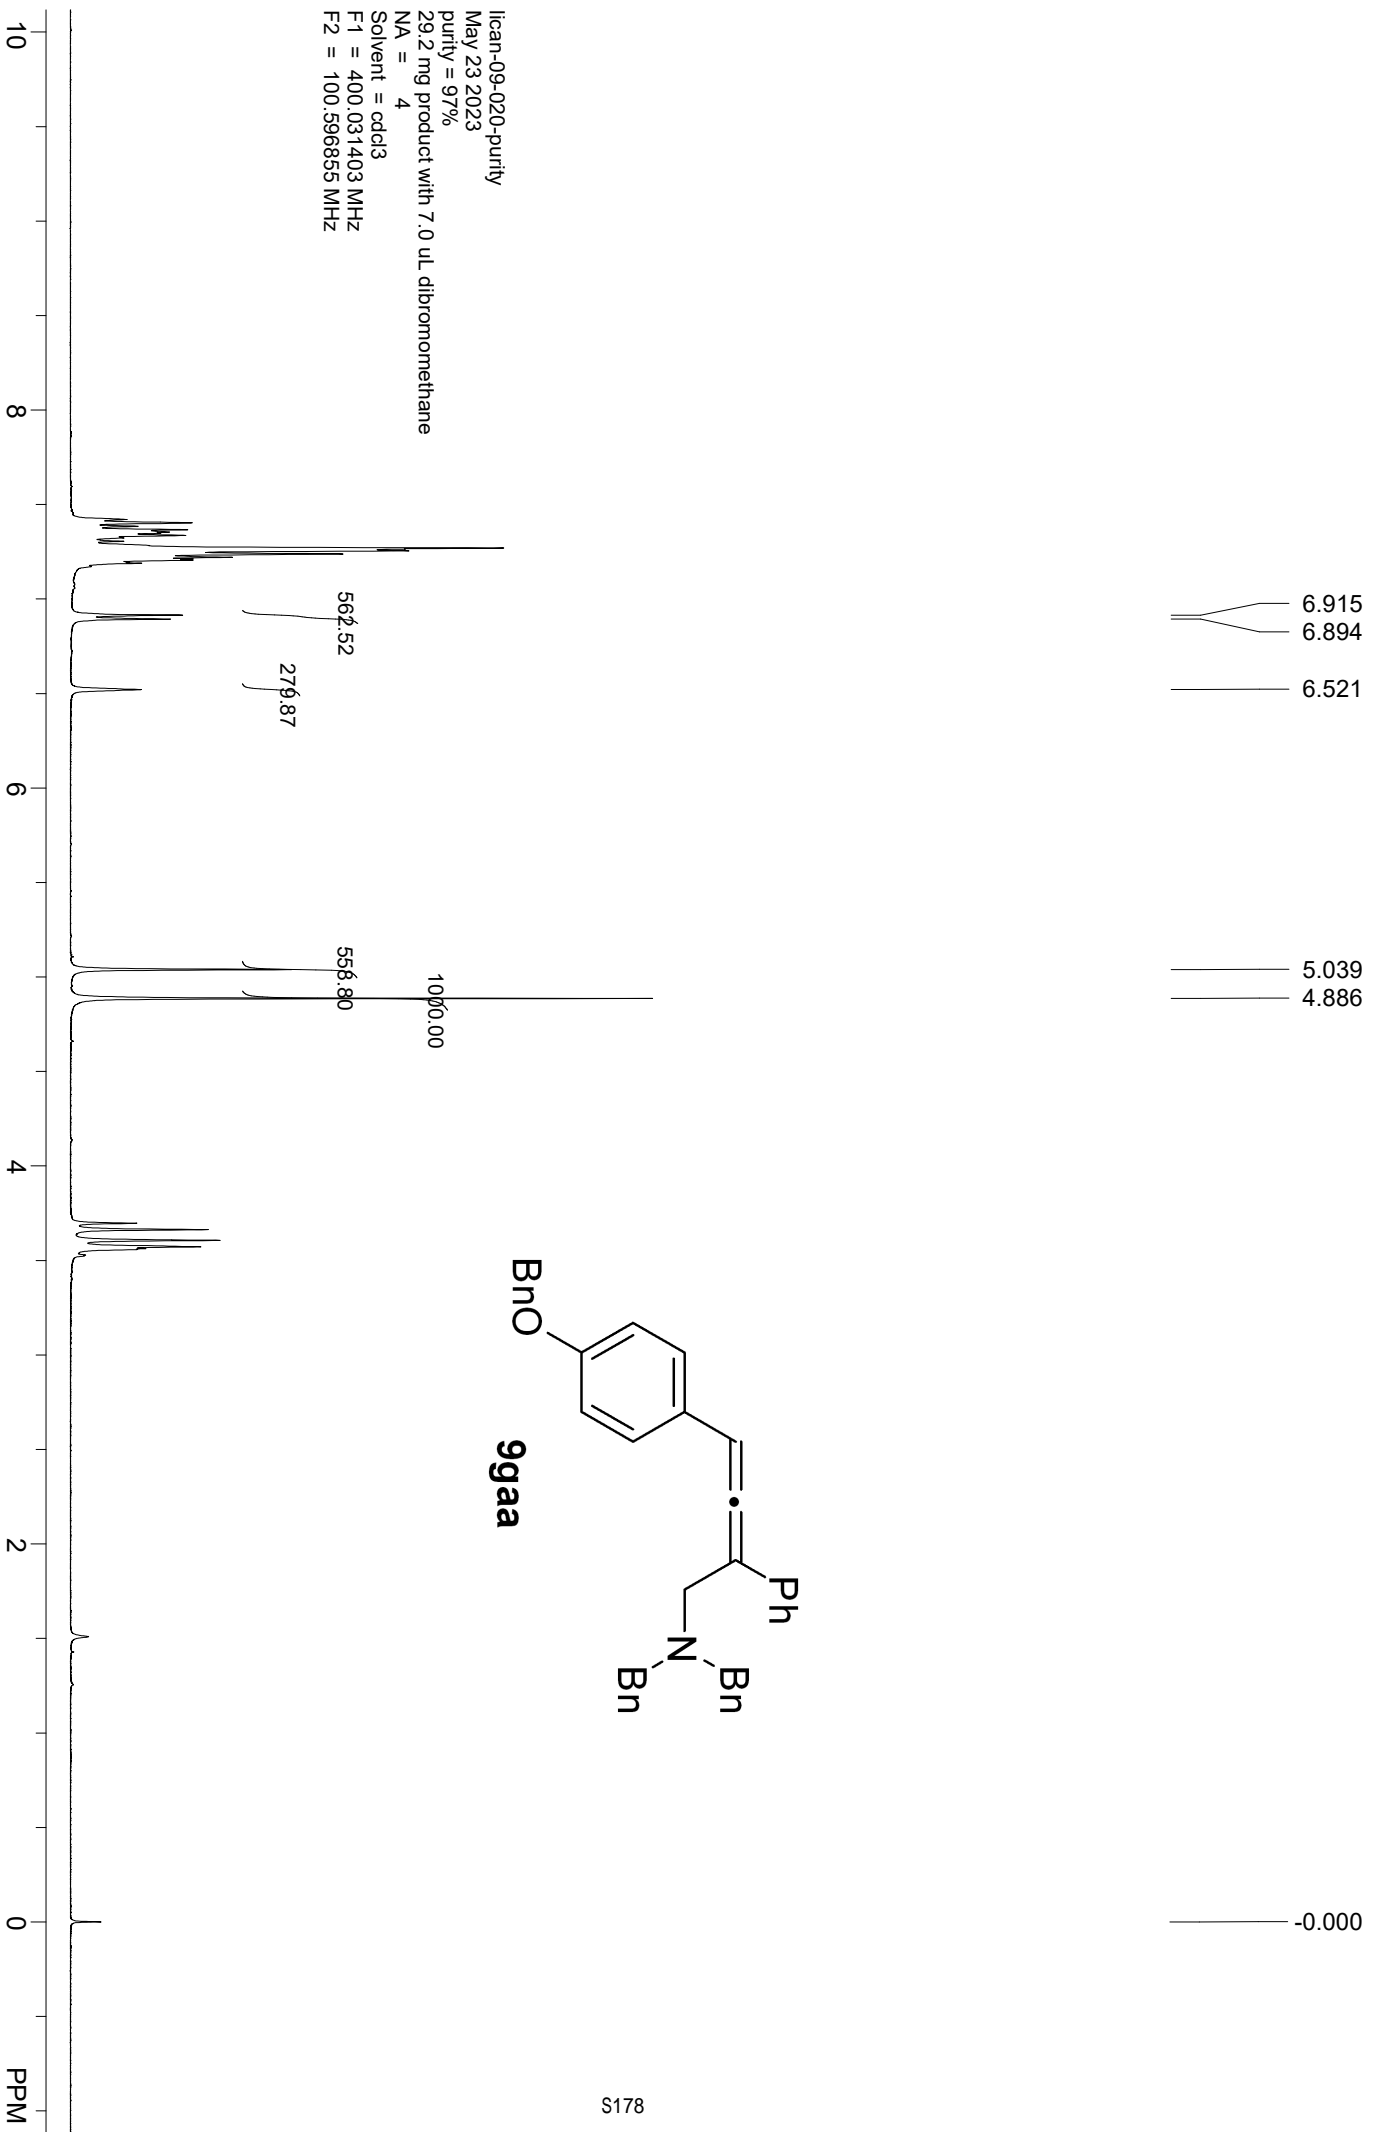

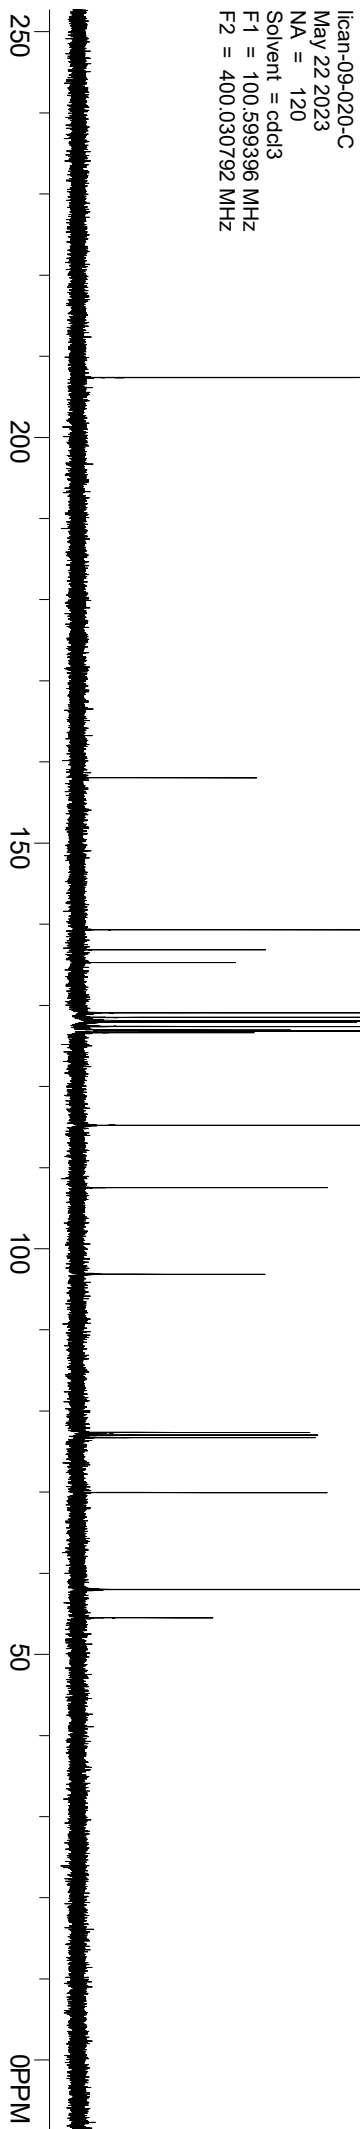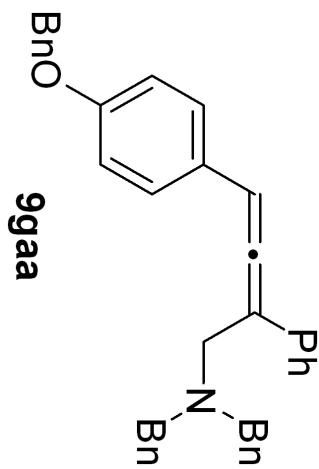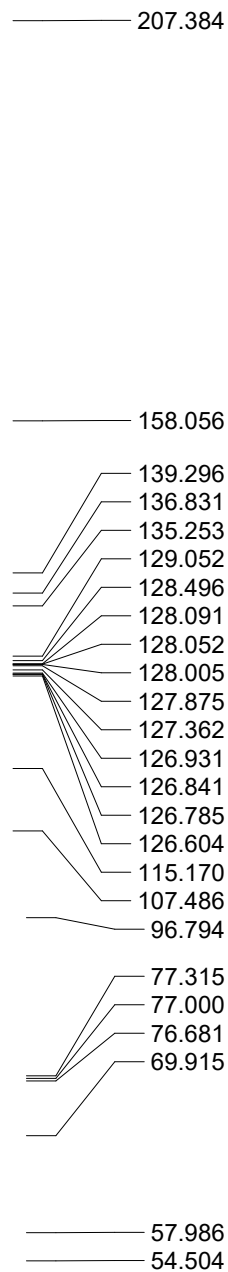

- 7.314
- 7.295
- 7.281
- 7.270
- 7.253
- 7.234
- 7.227
- 7.213
- 7.202
- 7.191
- 7.181
- 7.163
- 7.146
- 5.515
- 5.498
- 5.482
- 3.638
- 3.604
- 3.582
- 3.548
- 3.472
- 3.469
- 3.435
- 3.402
- 3.397
- 2.143
- 2.126
- 2.108
- 2.090
- 1.505
- 1.488
- 1.470
- 1.451
- 1.433
- 1.348
- 1.336
- 1.314
- 1.296
- 1.274
- 1.246
- 1.240
- 0.879
- 0.863
- 0.845
- 0.000

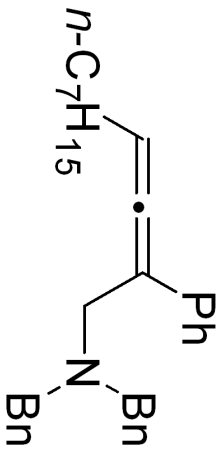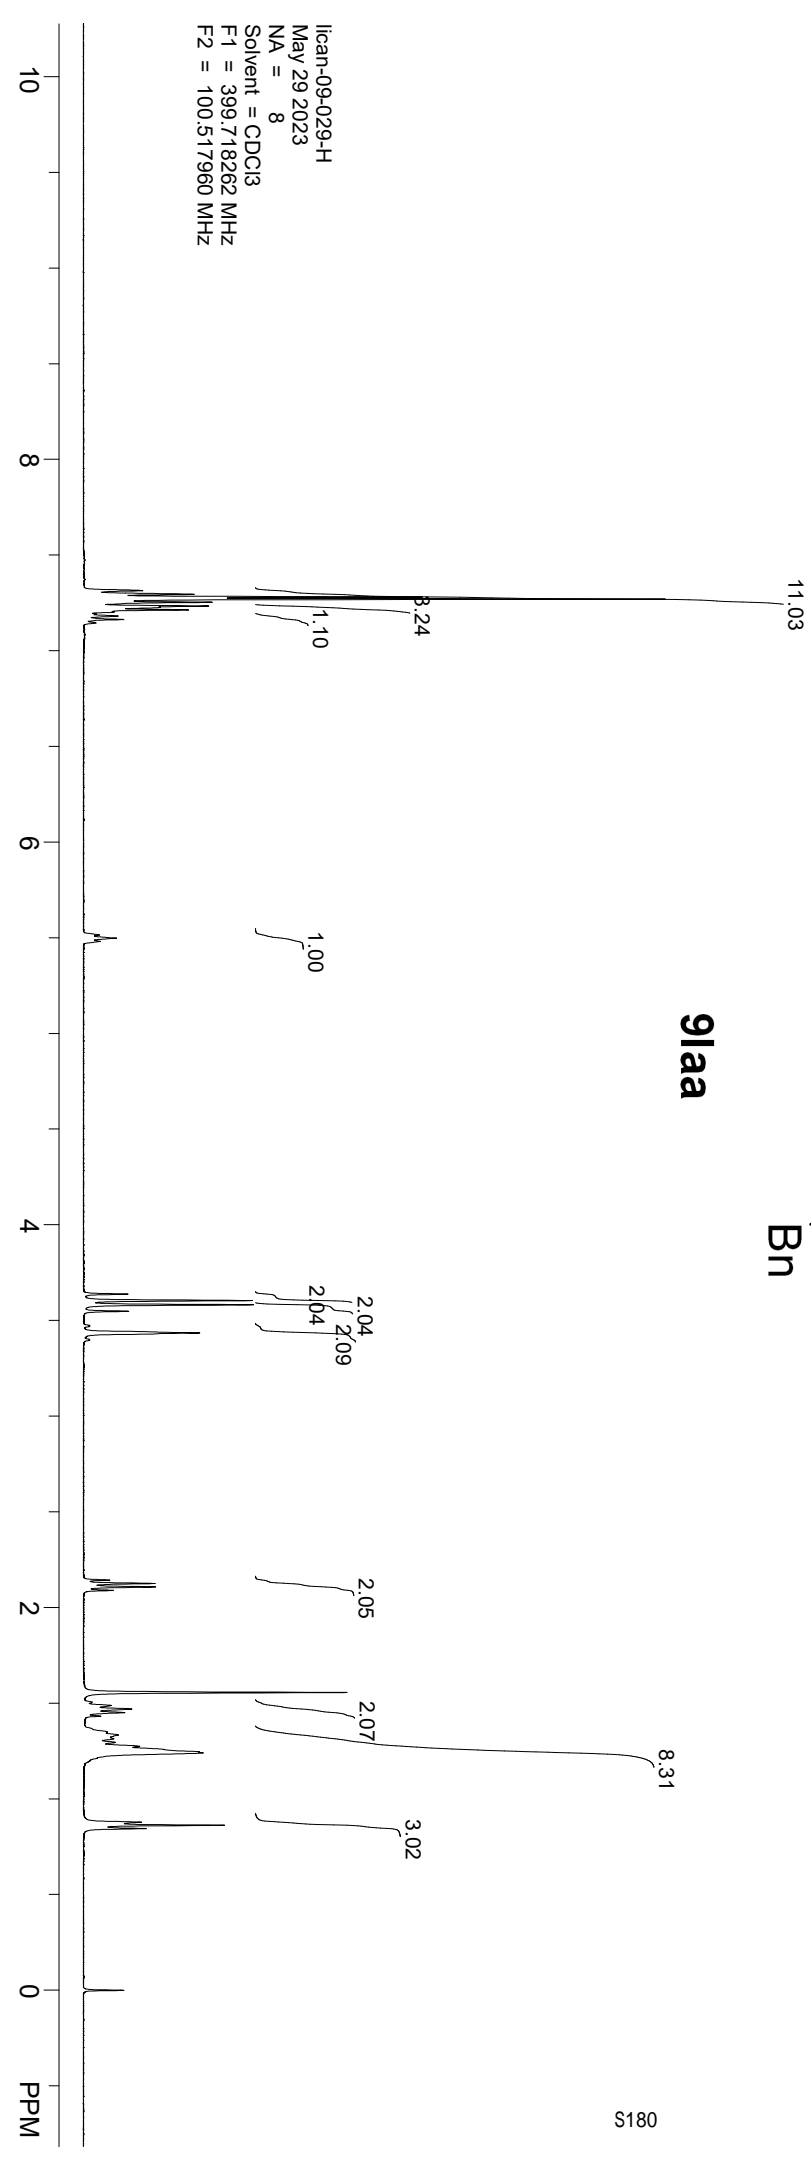

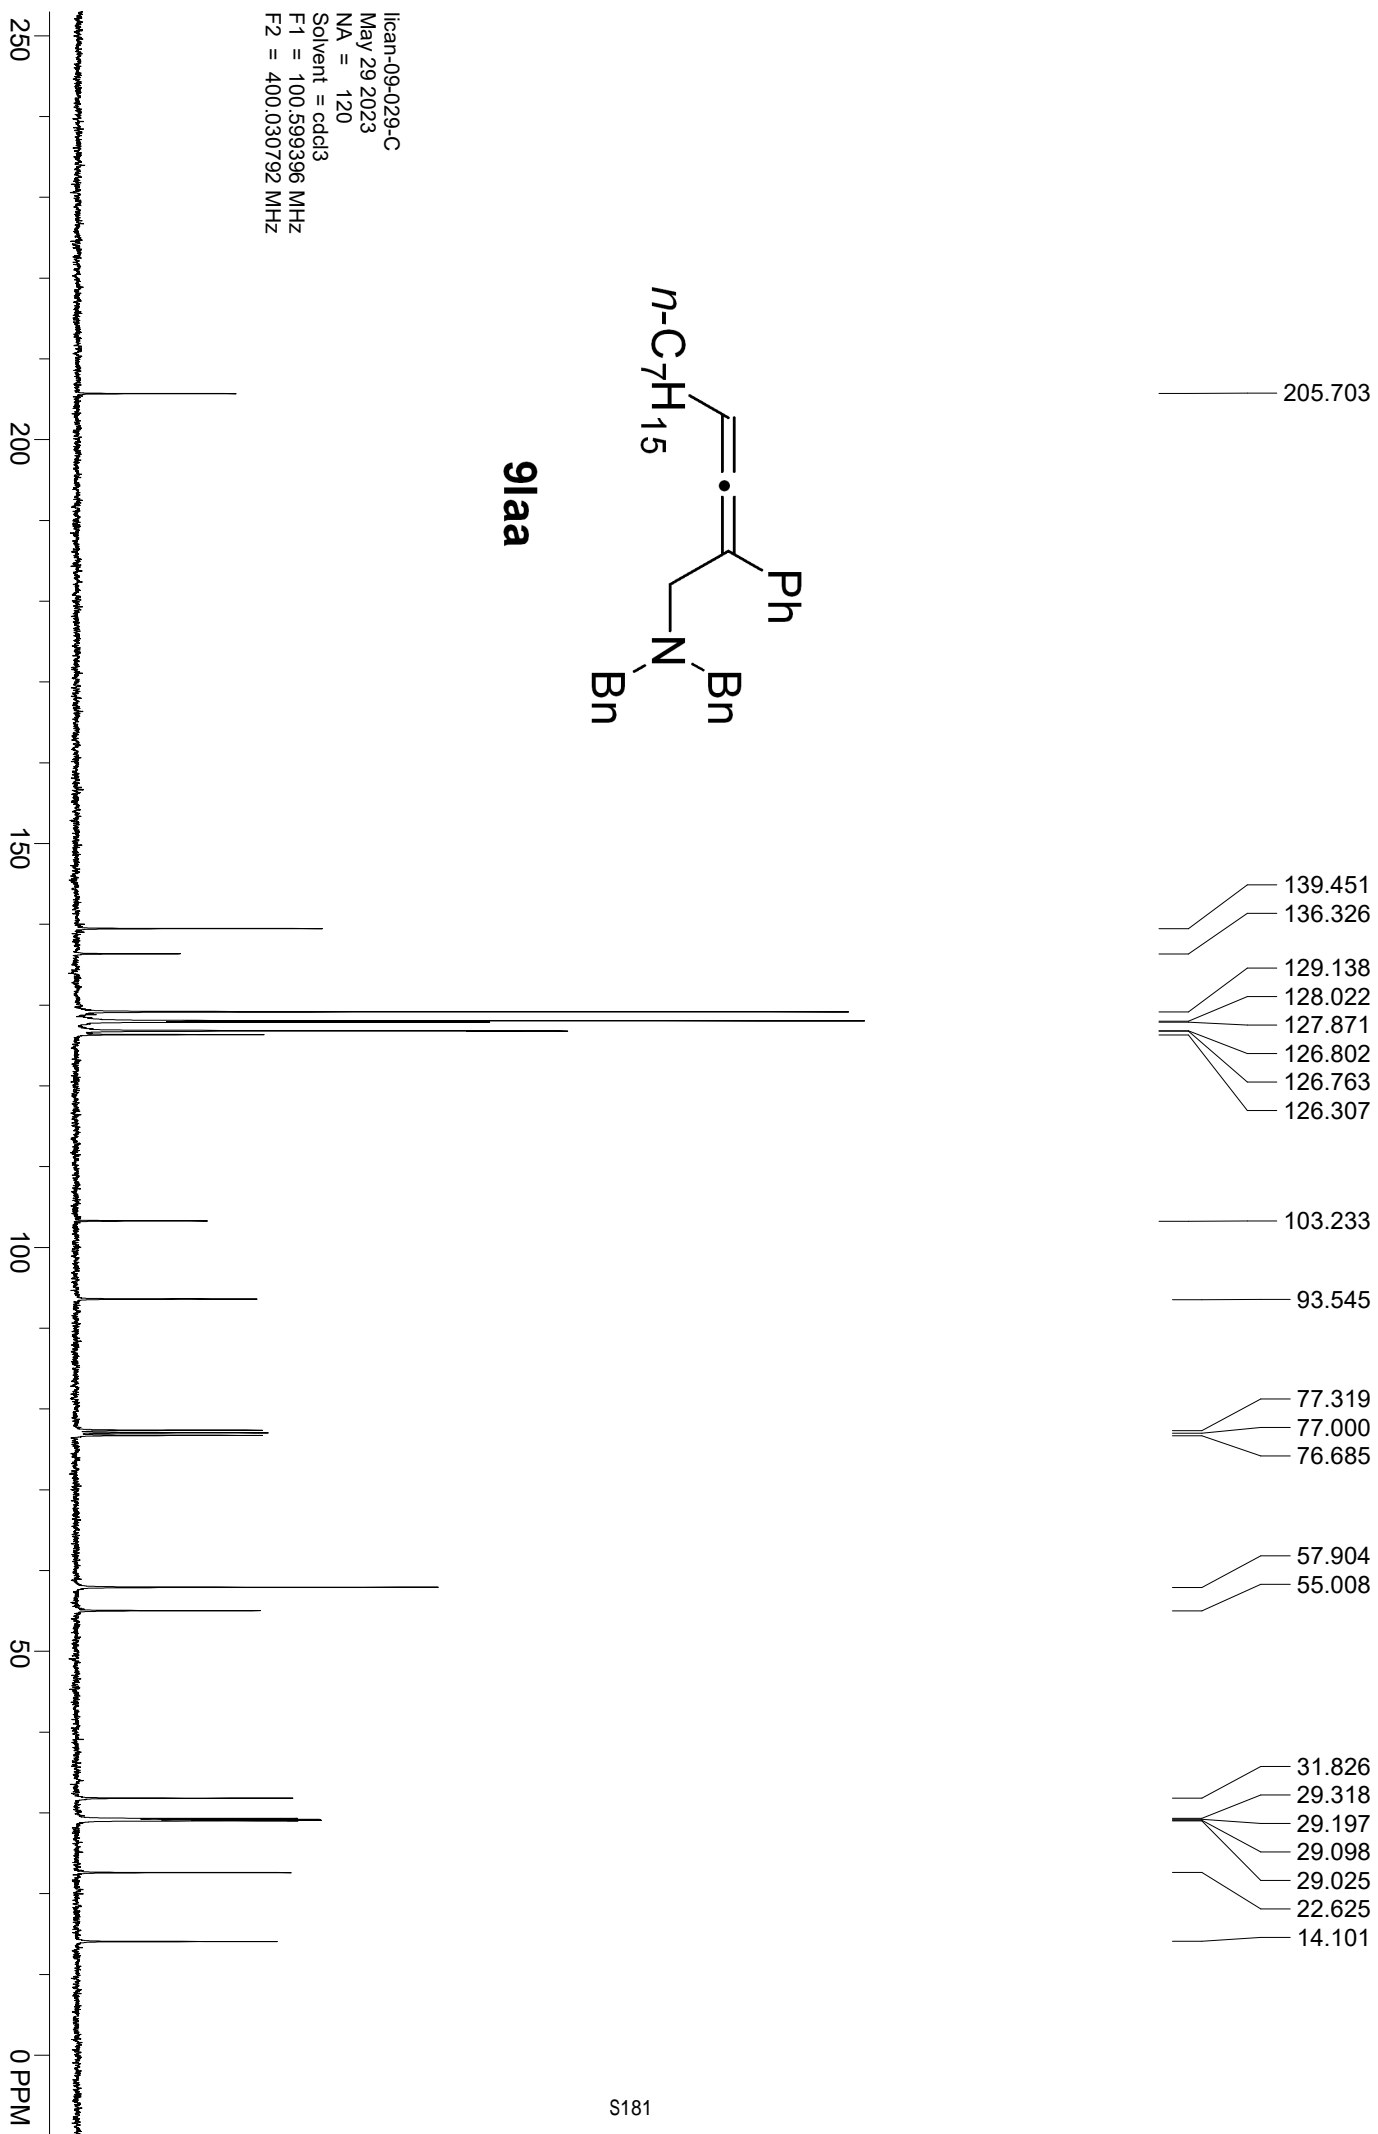

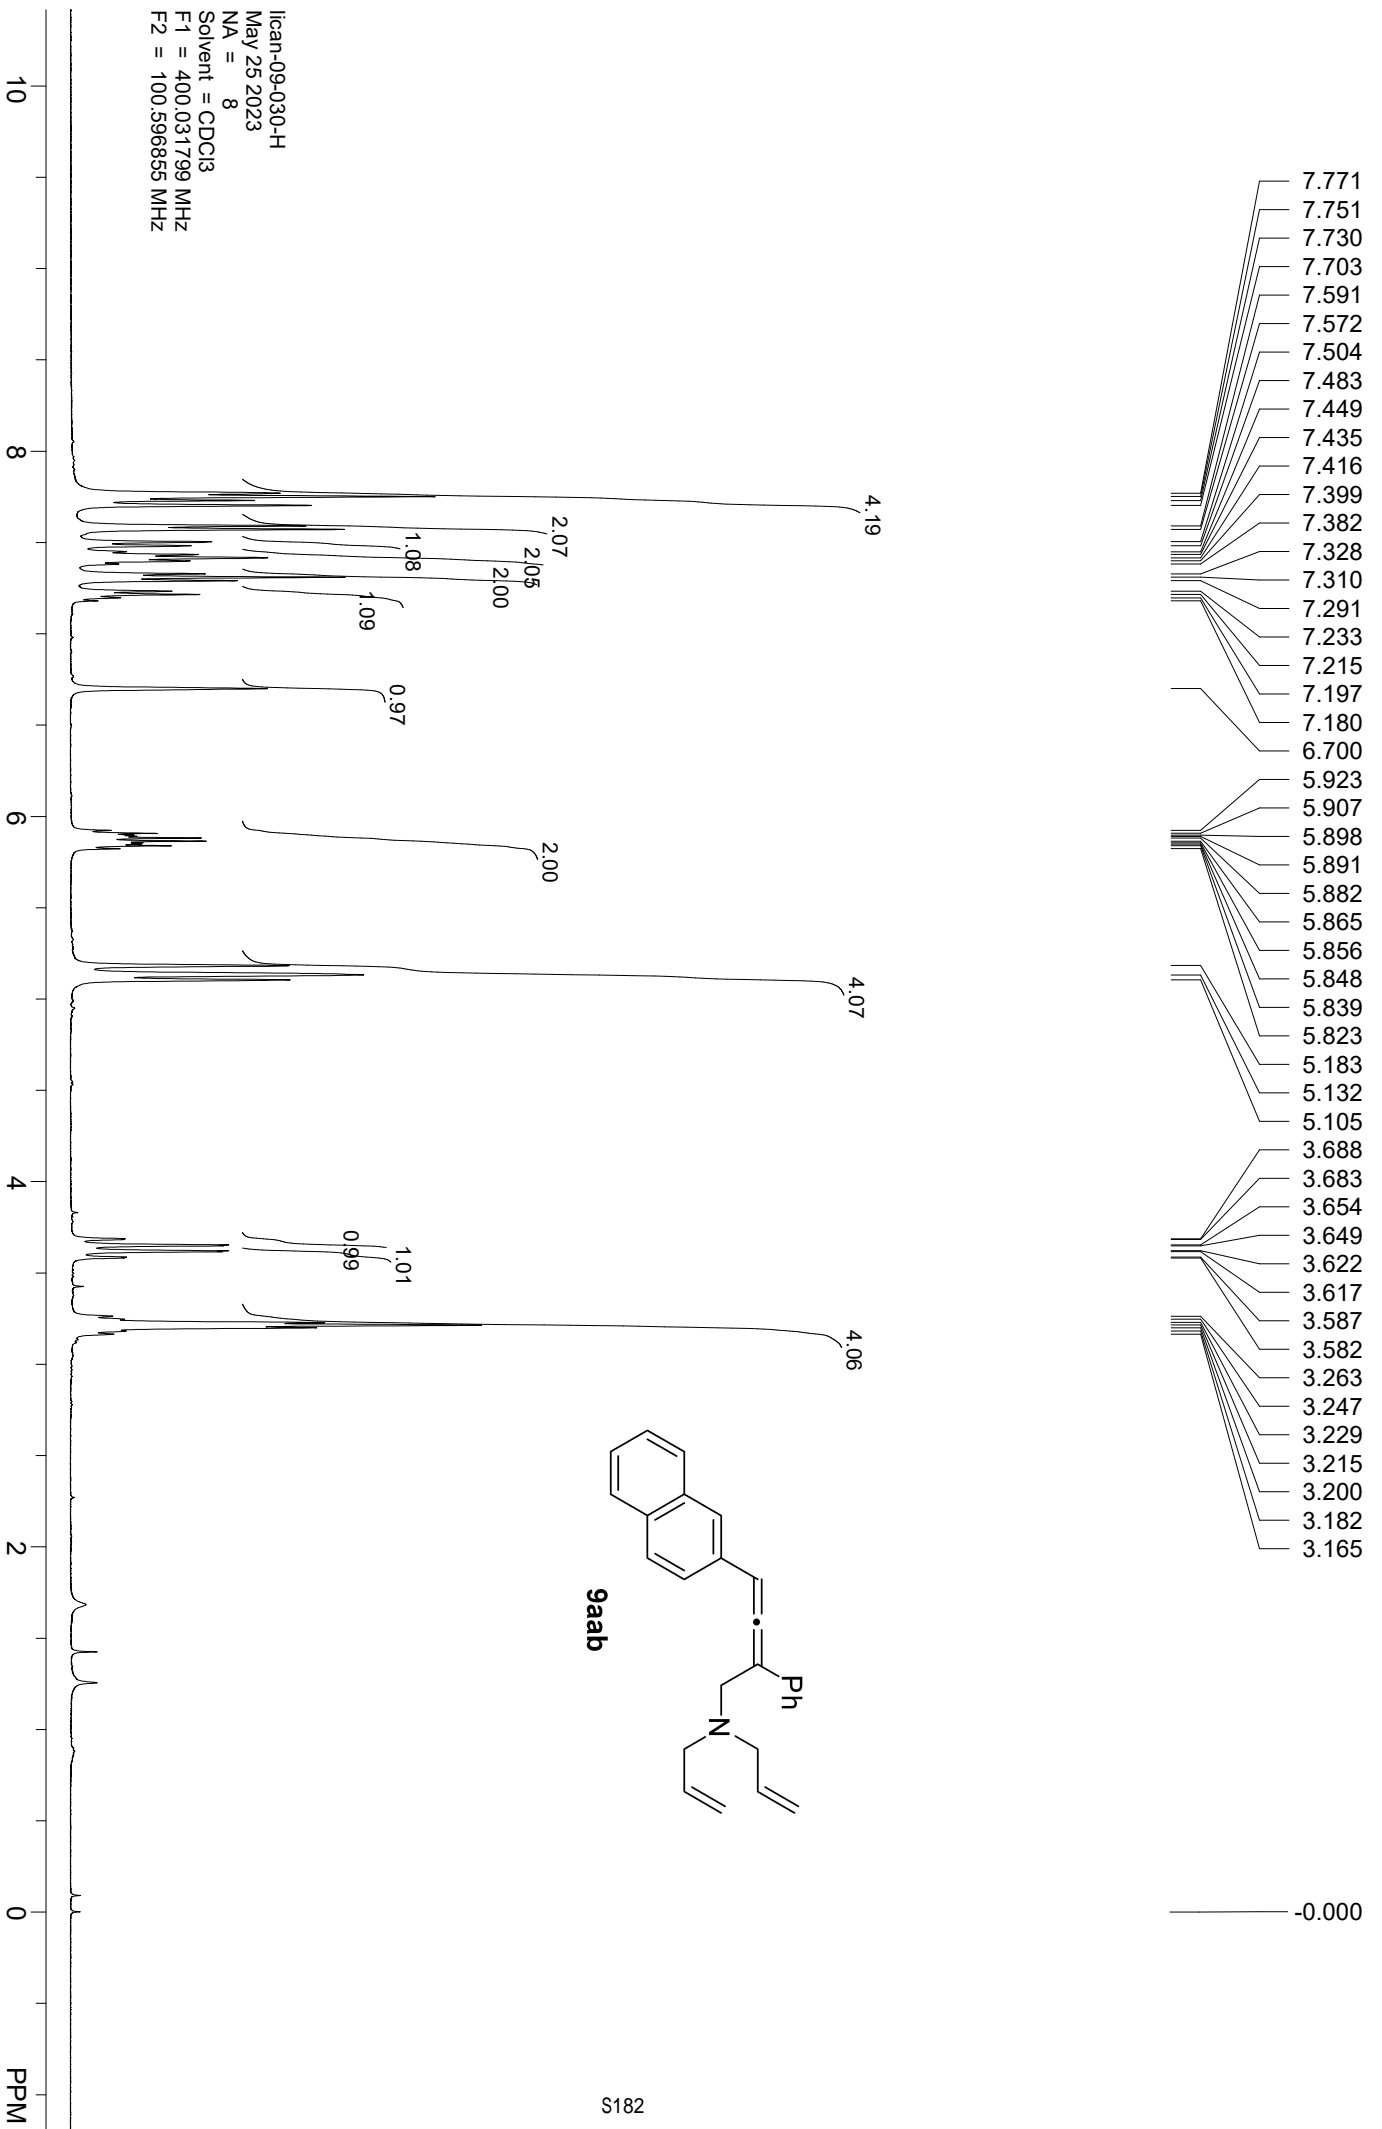

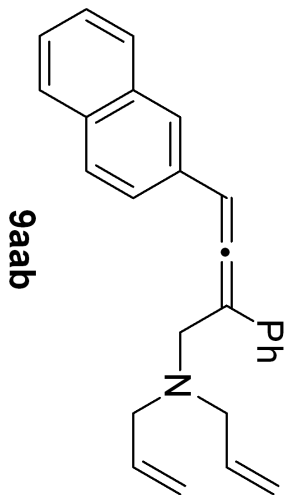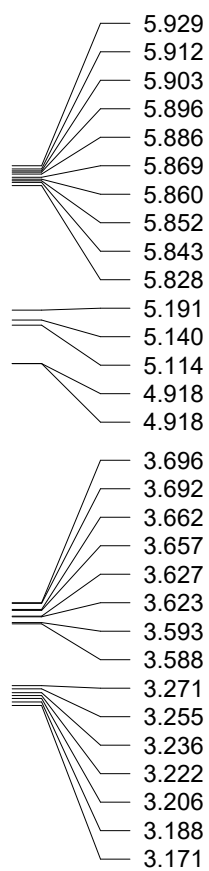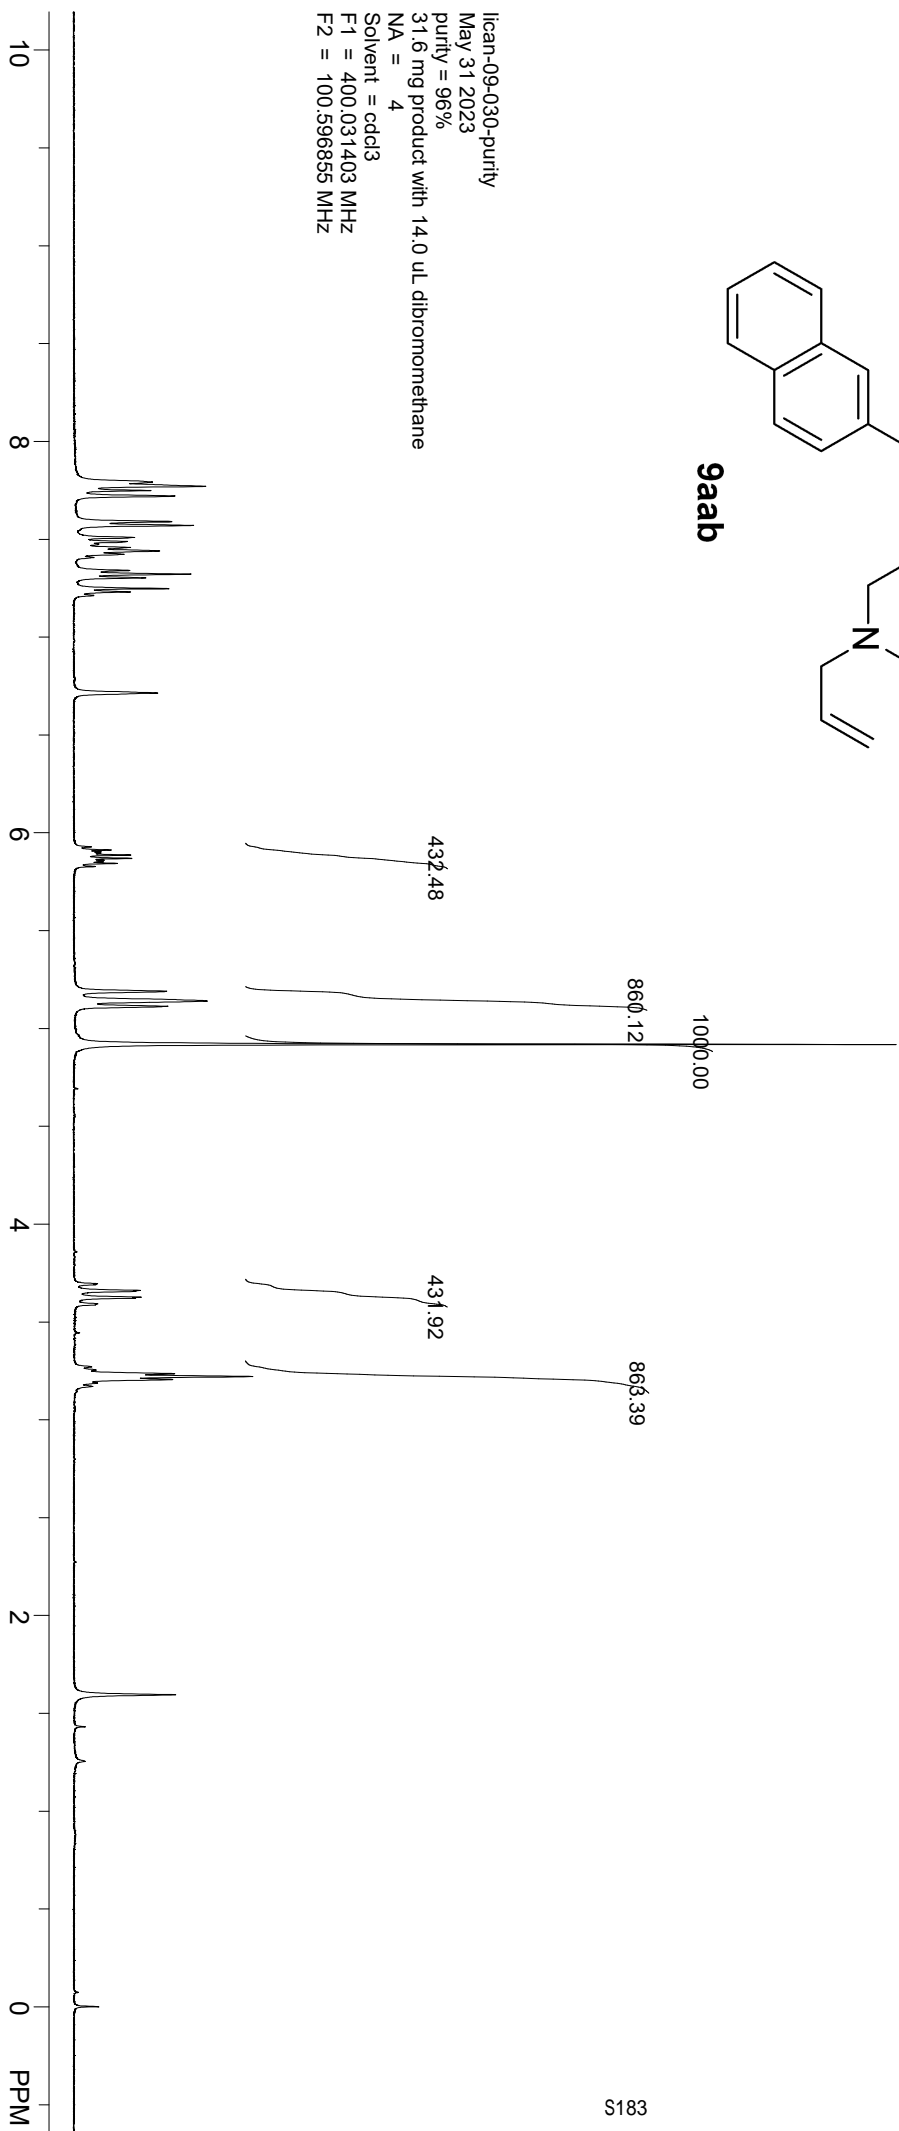

lican-09-030-purity  
May 31 2023  
purity = 96%  
31.6 mg product with 14.0 uL dibromomethane  
NA = 4  
Solvent = cdcl3  
F1 = 400.031403 MHz  
F2 = 100.596855 MHz

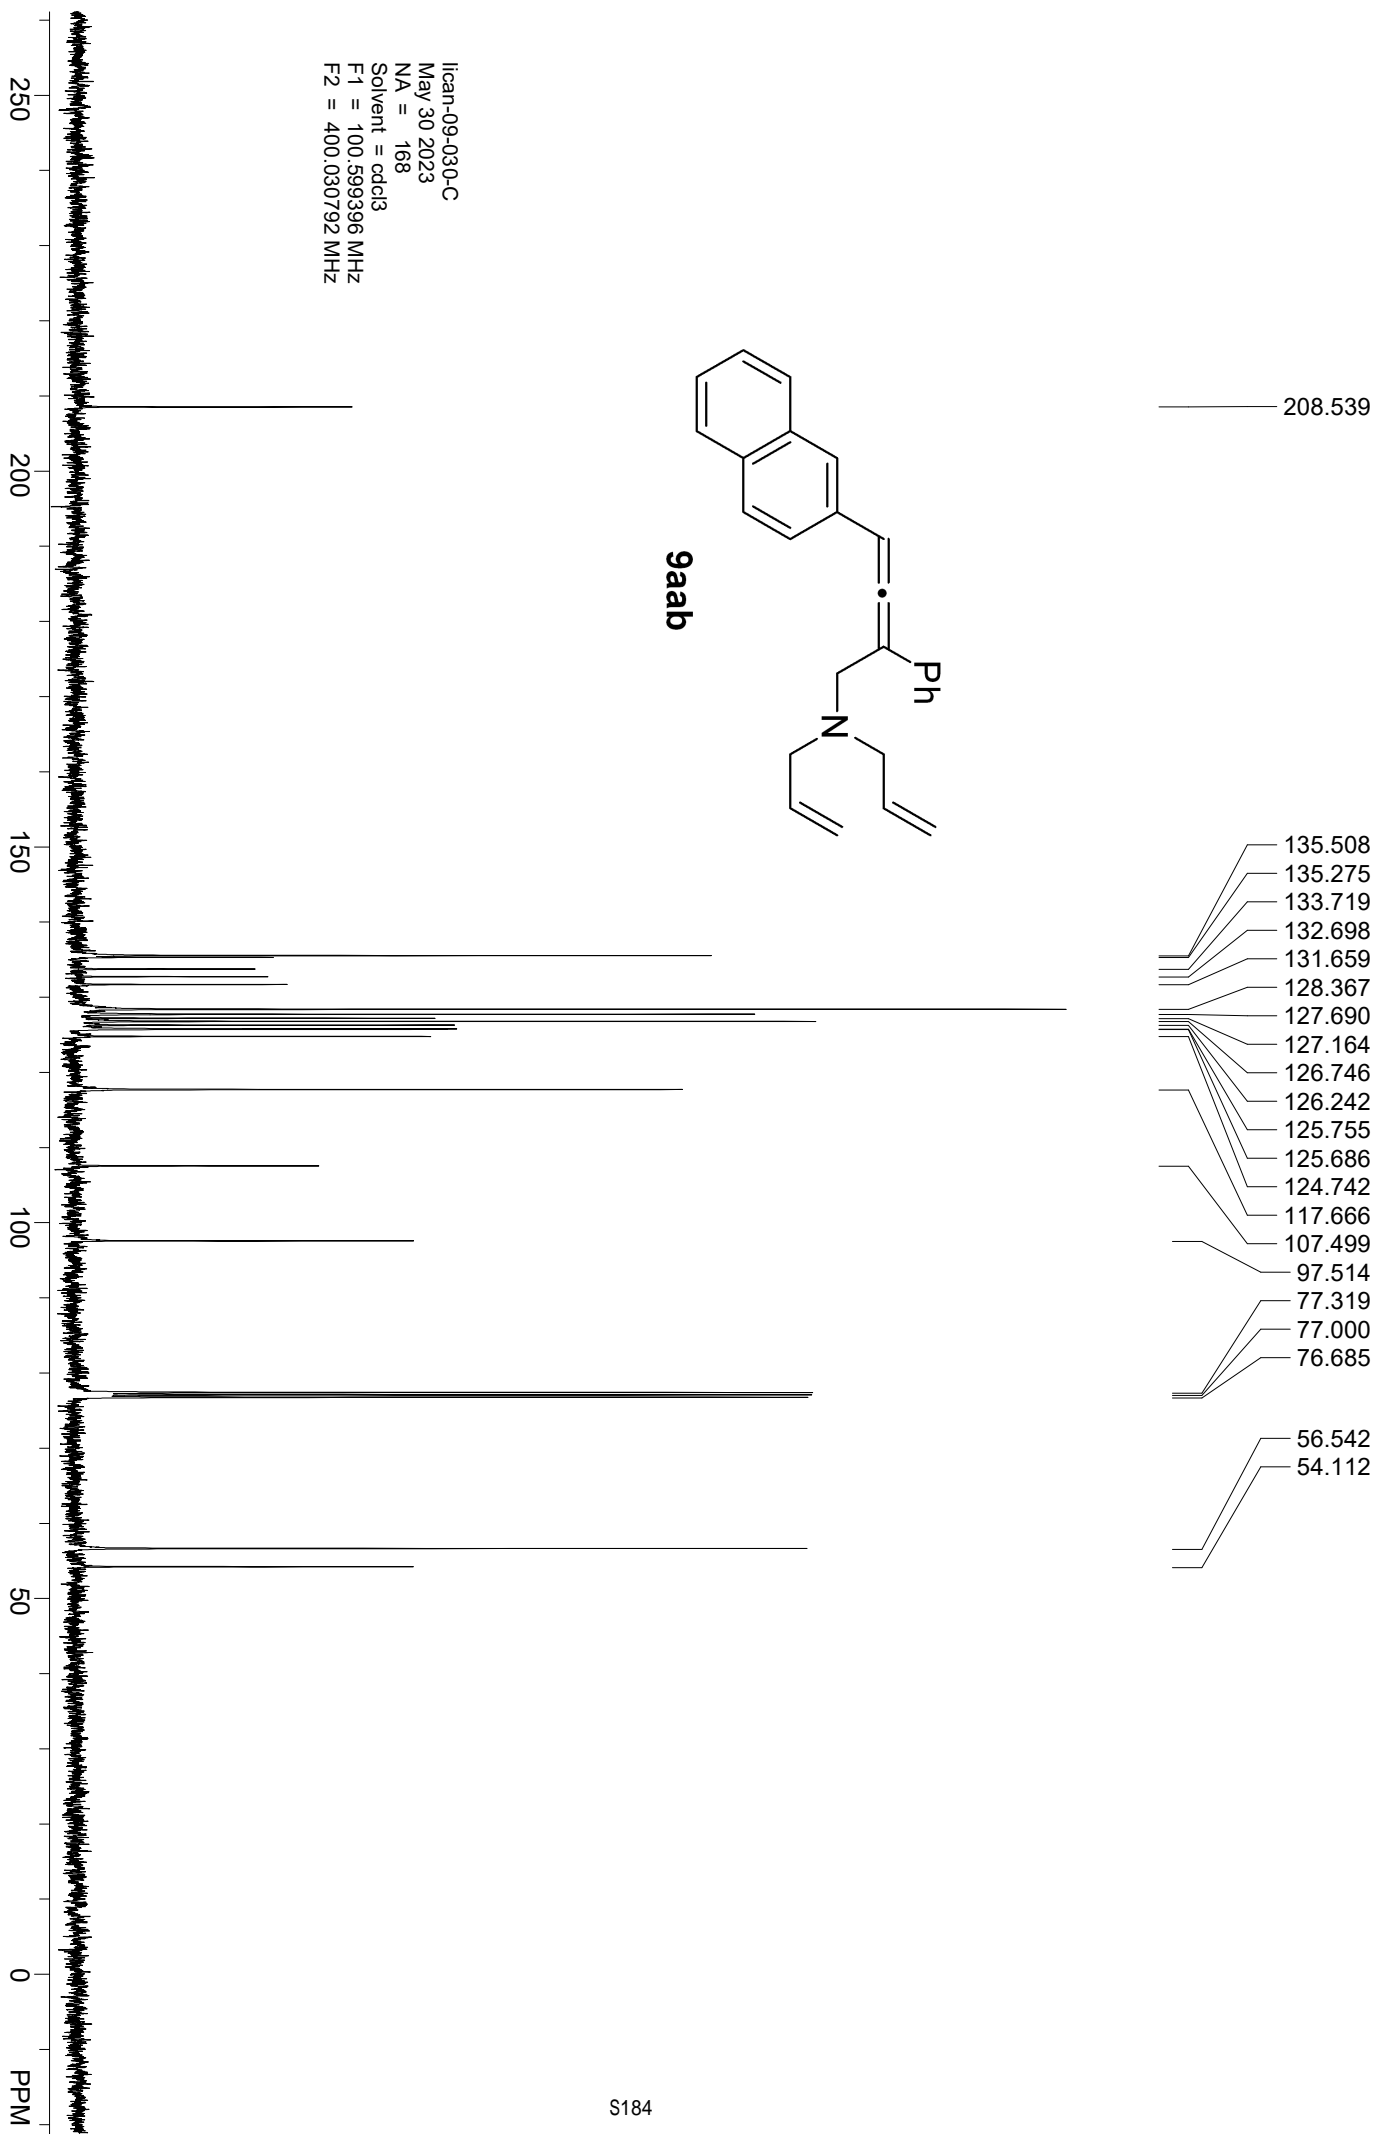



7.448  
7.429  
7.353  
7.335  
7.315  
7.282  
7.277  
7.261  
7.256  
7.248  
7.237  
7.220  
7.215  
6.559  
6.550  
6.542

3.009  
3.000  
2.990  
2.981  
2.970  
2.961  
3.535  
2.950  
2.942  
2.931  
2.923  
2.879  
2.870  
2.861  
2.852  
2.845  
2.836  
2.821  
2.812  
2.805  
2.796  
2.633  
2.614  
2.599  
2.594  
-0.000

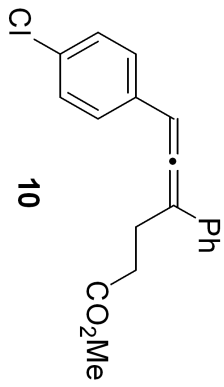

lican-08-023-H  
Nov 8 2022  
NA = 16  
Solvent = CDCl3  
F1 = 400.031616 MHz  
F2 = 100.596855 MHz

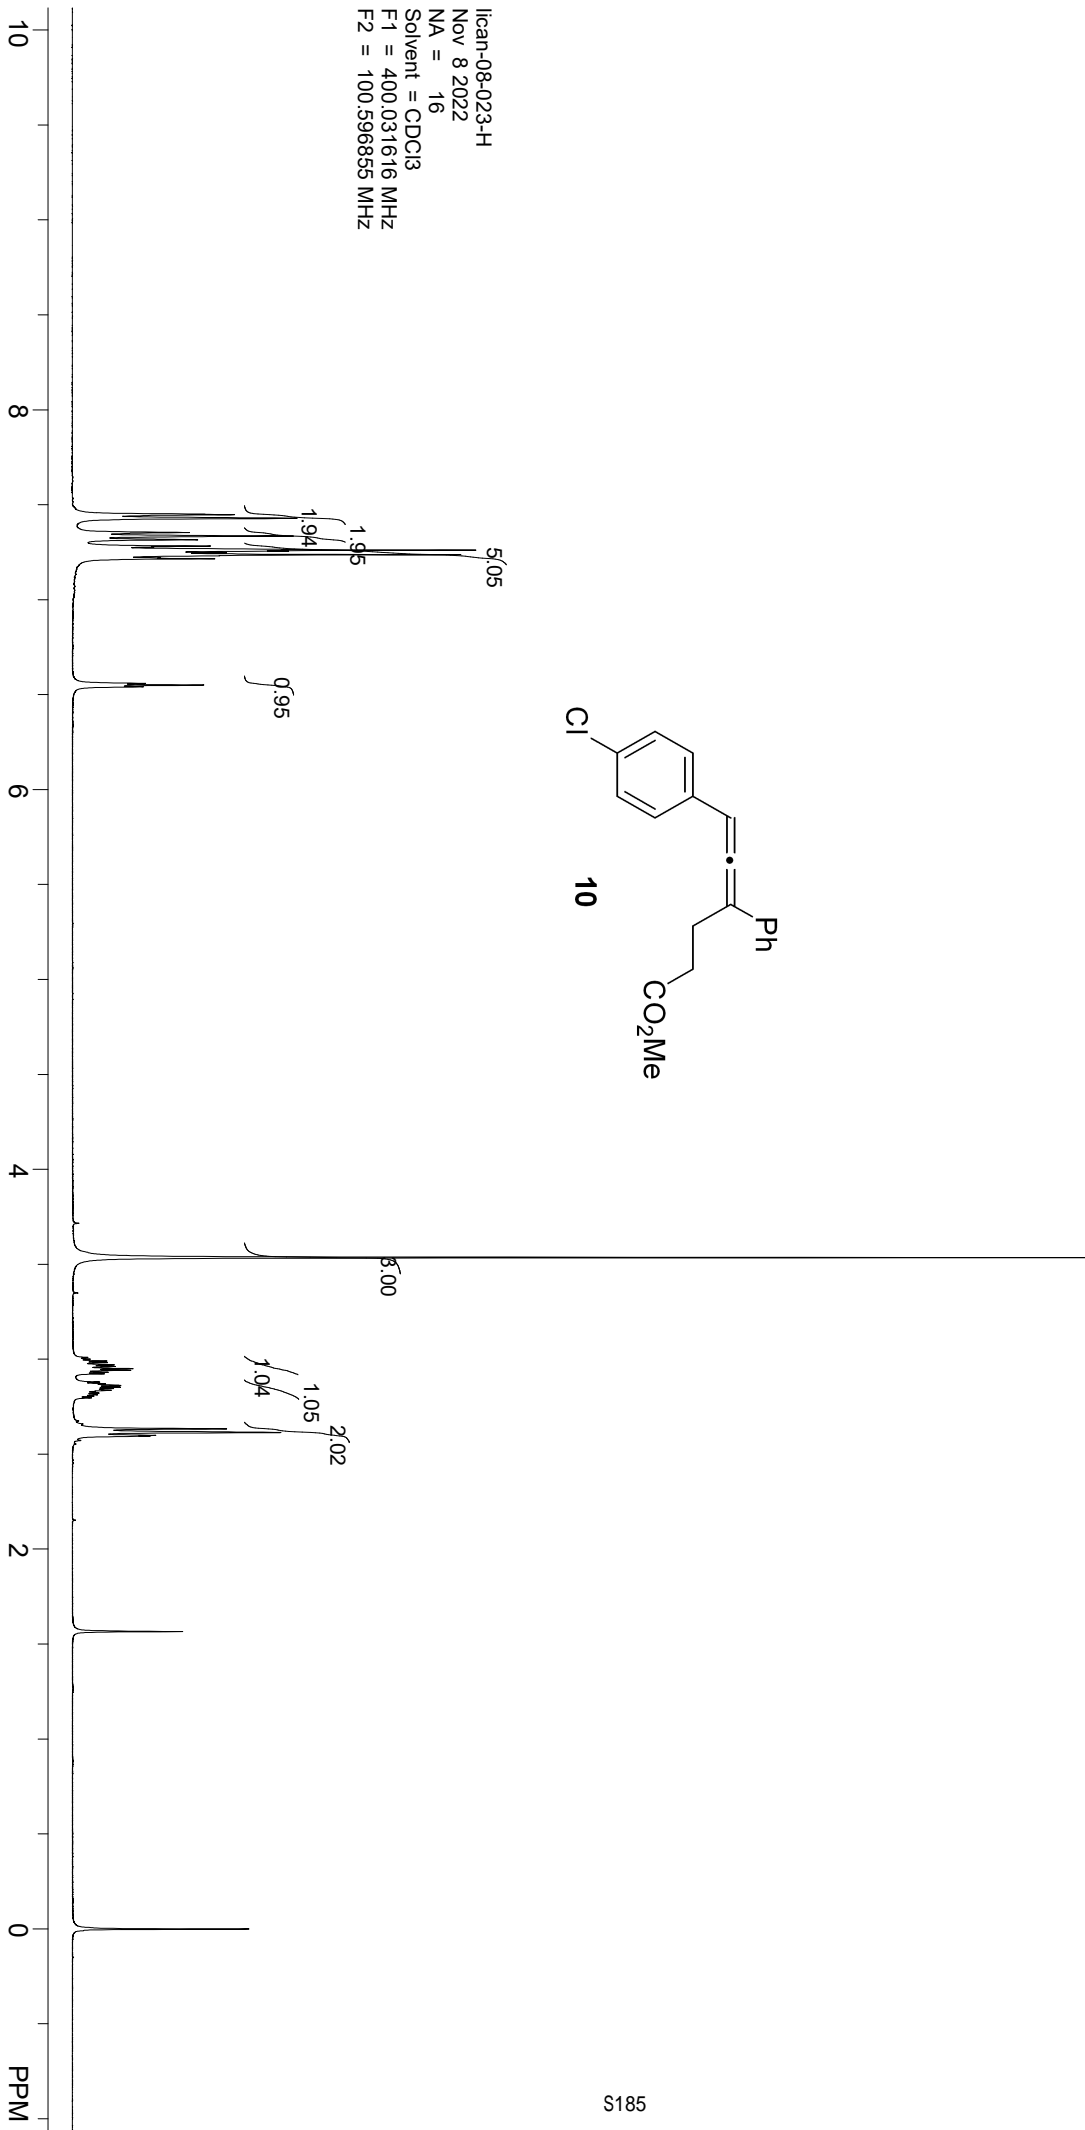

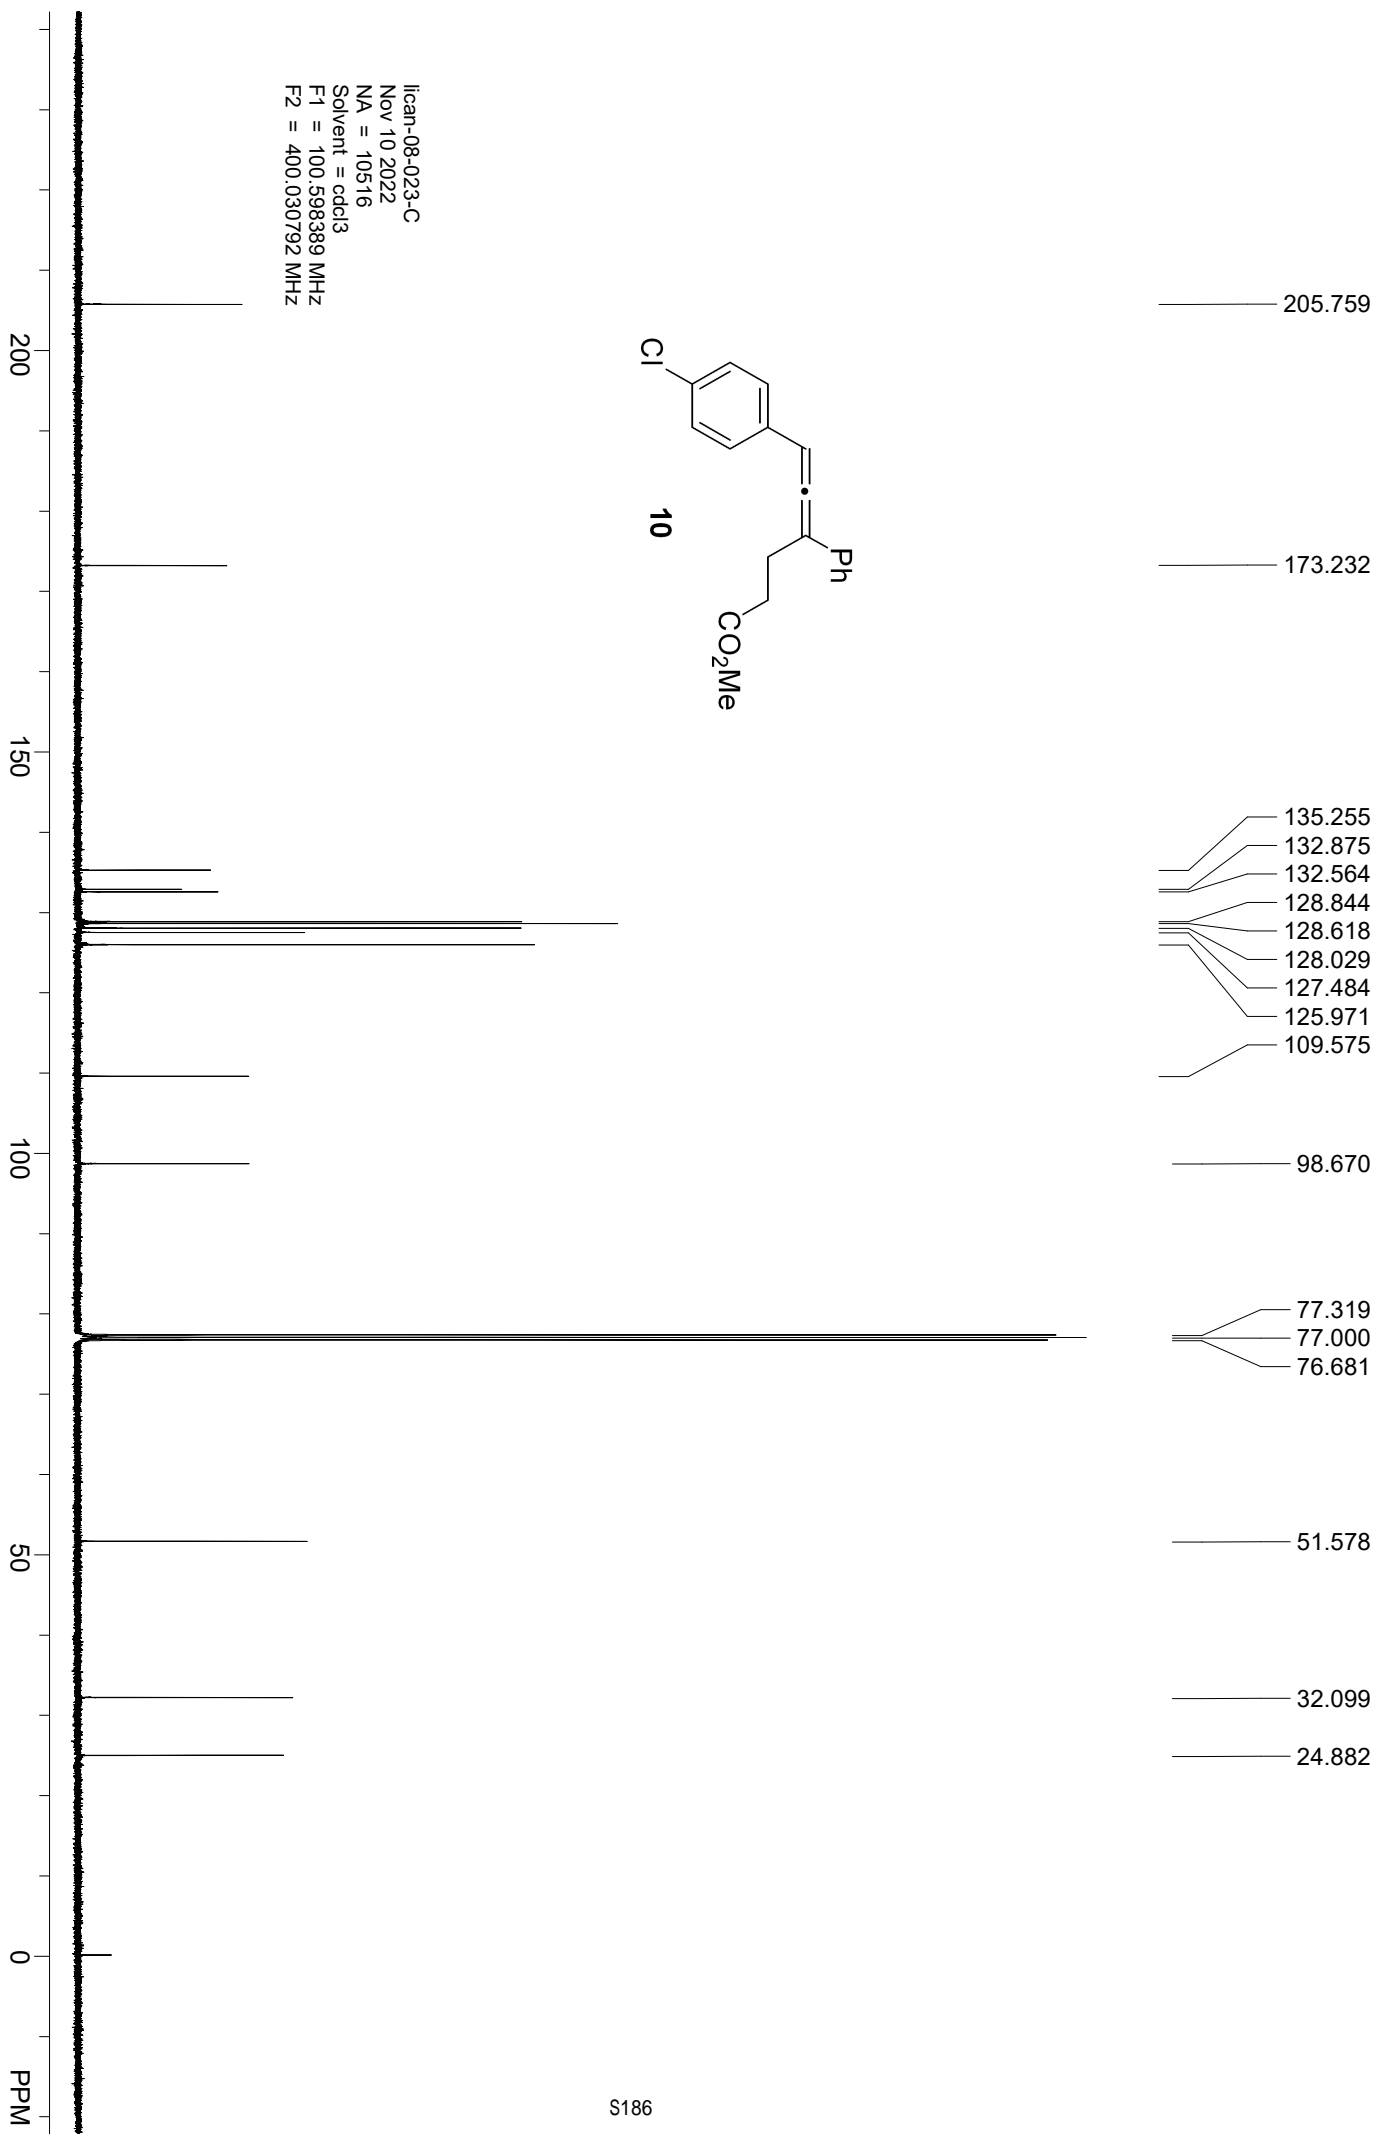

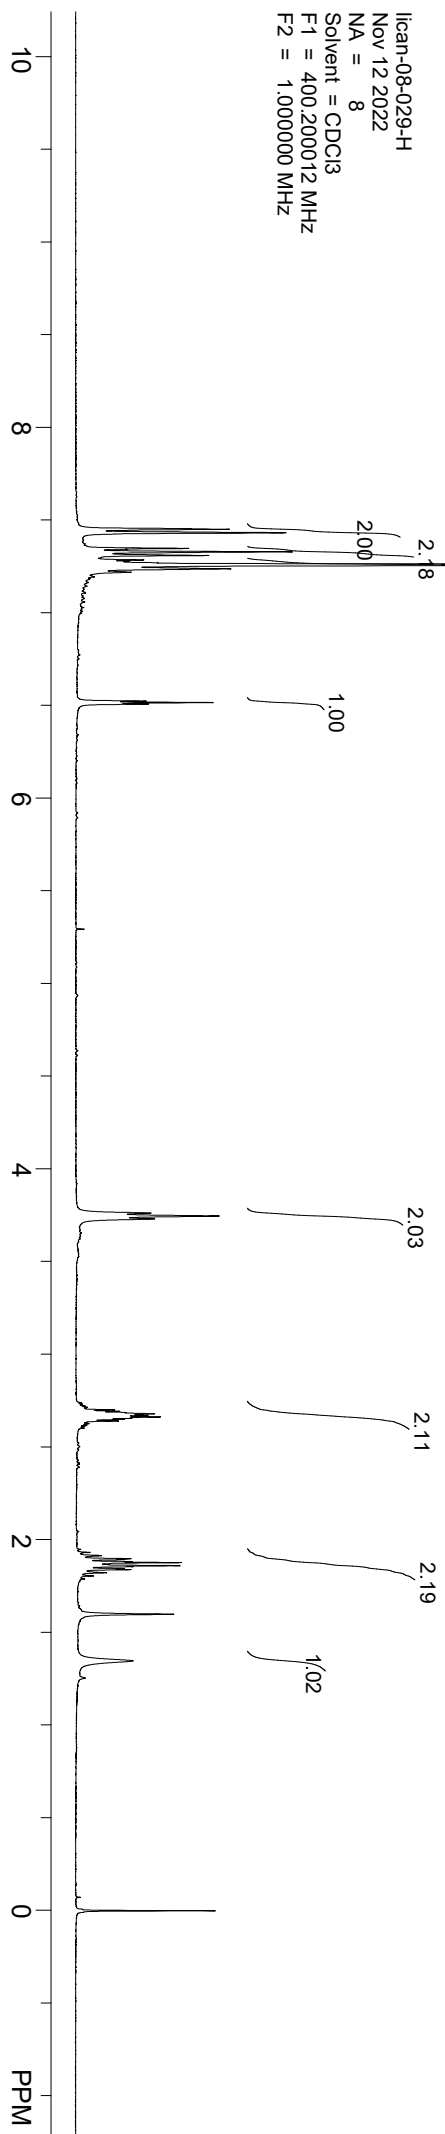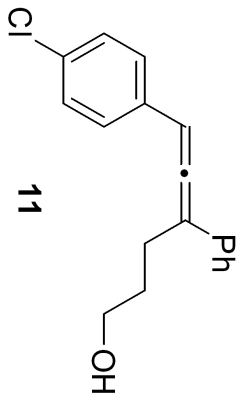

- 7.450
- 7.431
- 7.347
- 7.328
- 7.308
- 7.284
- 7.277
- 7.262
- 7.255
- 7.237
- 7.218
- 6.523
- 6.515
- 6.507

- 3.760
- 3.744
- 3.729

- 2.730
- 2.721
- 2.699
- 2.691
- 2.685
- 2.677
- 2.669
- 2.661
- 2.653
- 2.647
- 2.639
- 2.625
- 2.617
- 2.609

- 2.601
- 1.947
- 1.931
- 1.913
- 1.897
- 1.892
- 1.881
- 1.876
- 1.859
- 1.854
- 1.843
- 1.838
- 1.821
- 1.804
- 1.788
- 1.346
- 0.000

lican-08-029-purity  
Nov 12 2022  
purity = 94%  
12.7 mg product with 14 uL dibromomethane  
NA = 8  
Solvent = CDCl3  
F1 = 400.200012 MHz  
F2 = 1.000000 MHz

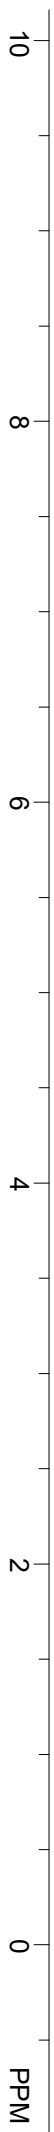

6.522  
6.515  
6.507

4.924

3.757  
3.741  
3.726

0.000

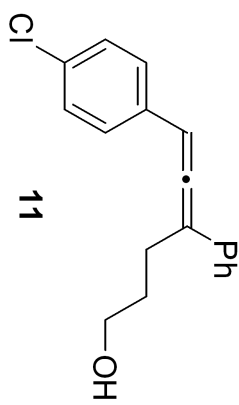

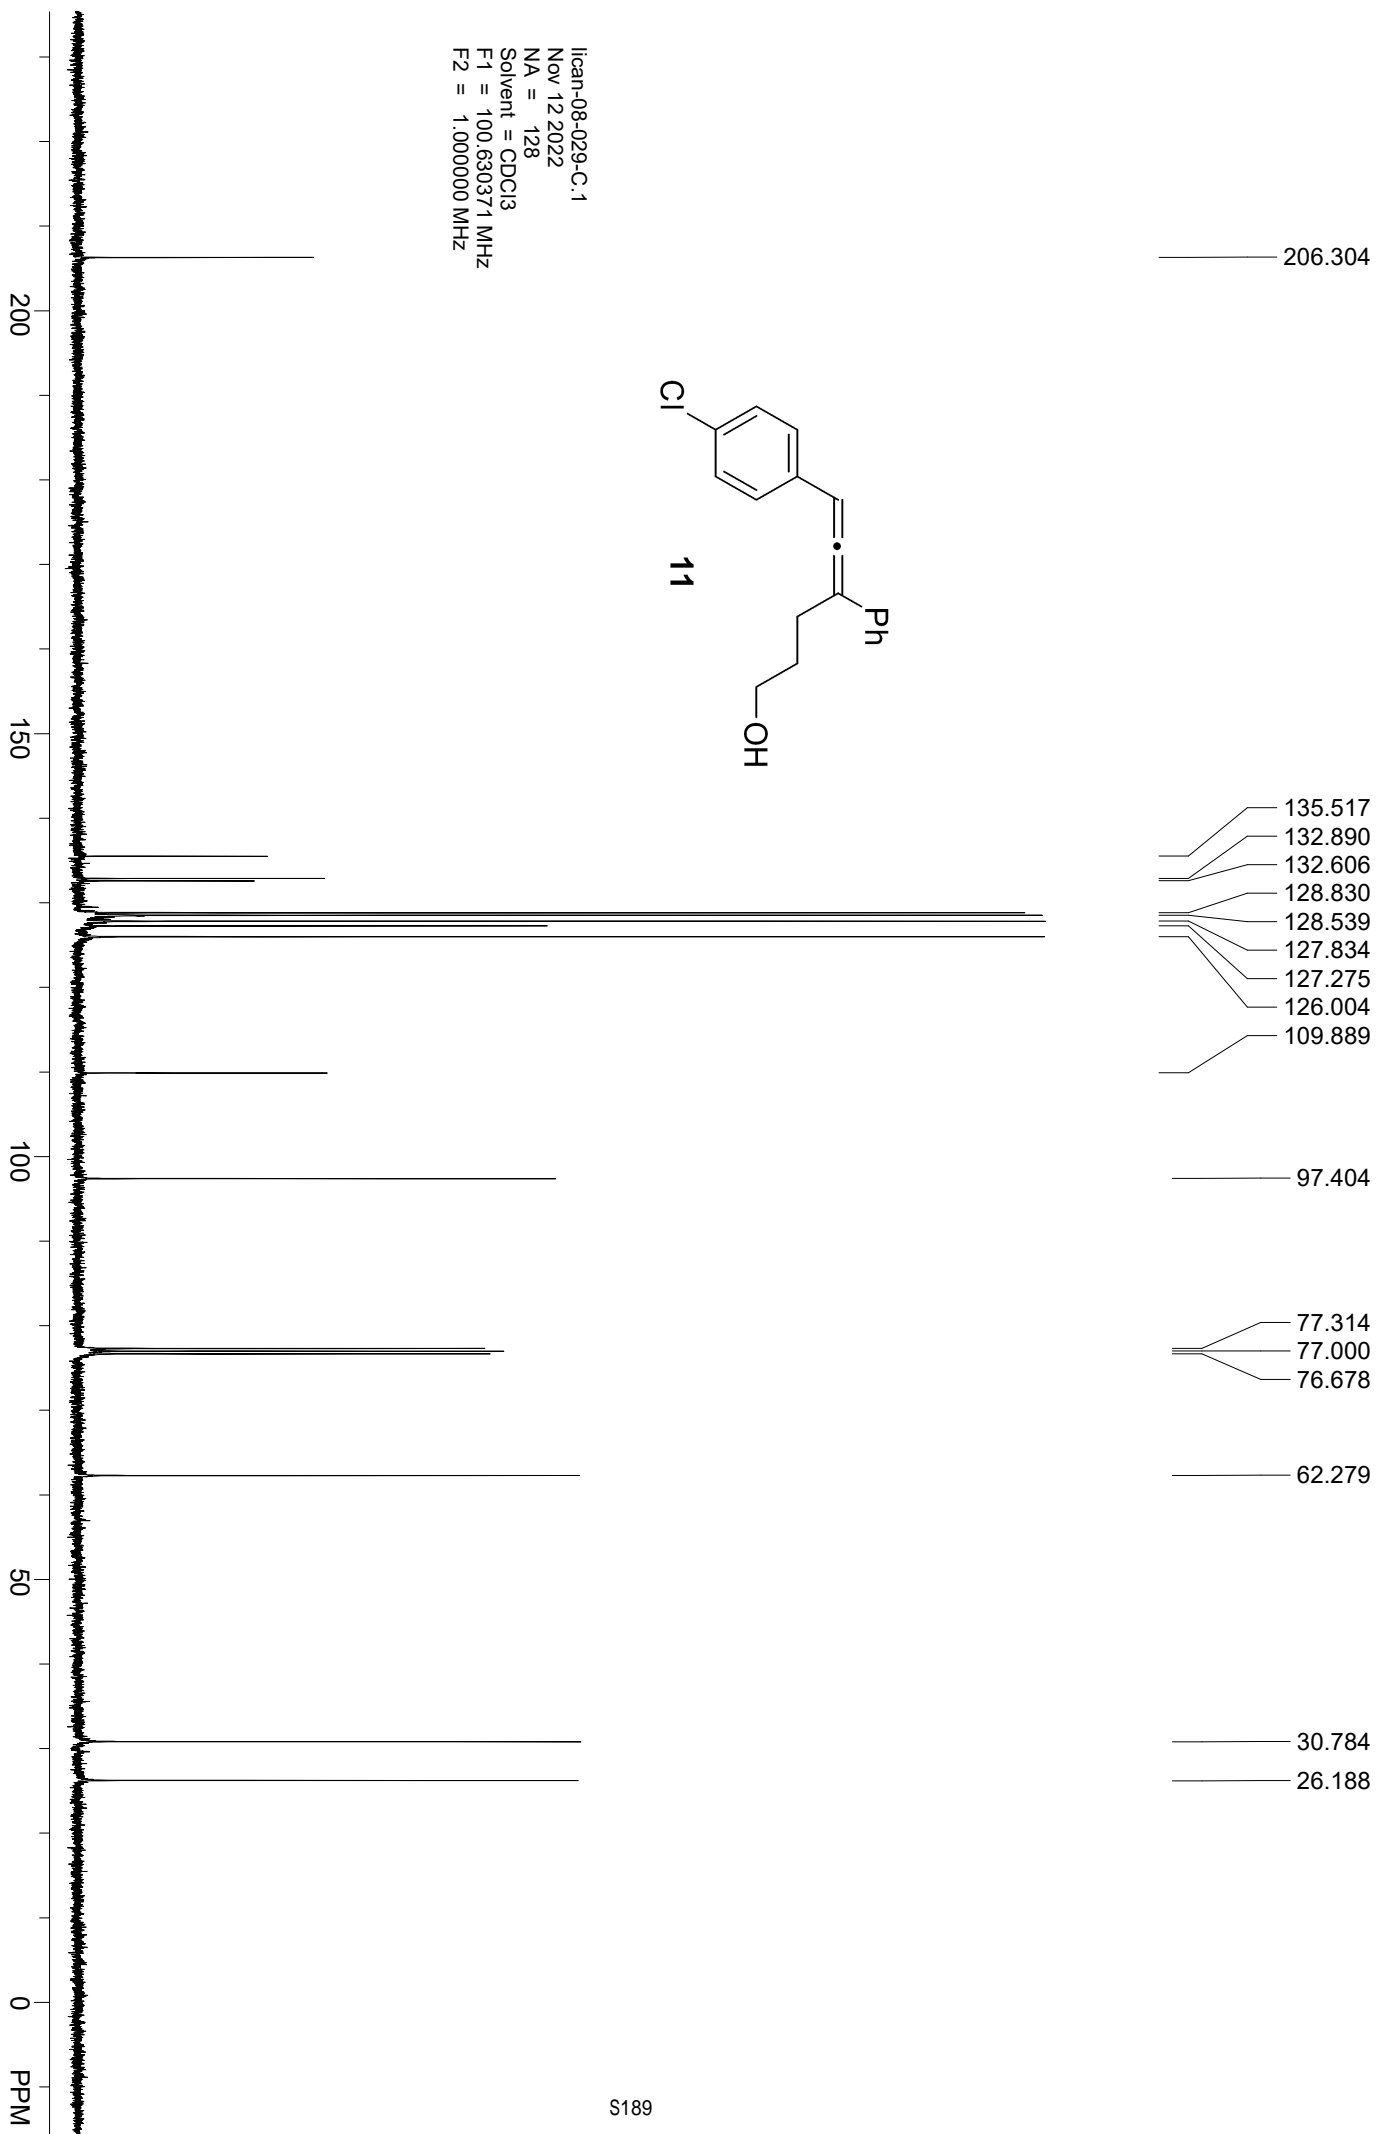

7.446  
7.427  
7.356  
7.337  
7.318  
7.269  
7.255  
7.236  
7.224  
7.208  
7.202  
6.576  
6.568  
6.560

2.985  
2.976  
2.965  
2.957  
2.946  
2.937  
2.926  
2.917  
2.907  
2.898  
2.849  
2.839  
2.830  
2.821  
2.815  
2.806  
2.793  
2.781  
2.775  
2.766  
2.706  
2.690  
2.663  
2.653  
2.648  
2.634  
2.615  
2.592  
2.573  
0.000

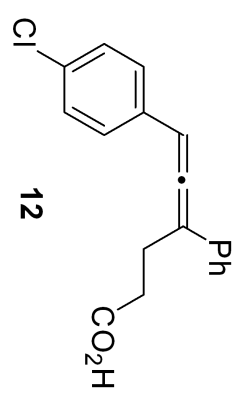

llican-08-021-1-H  
Nov 8 2022  
NA = 8  
Solvent = CDCl3  
F1 = 400.031616 MHz  
F2 = 100.596855 MHz

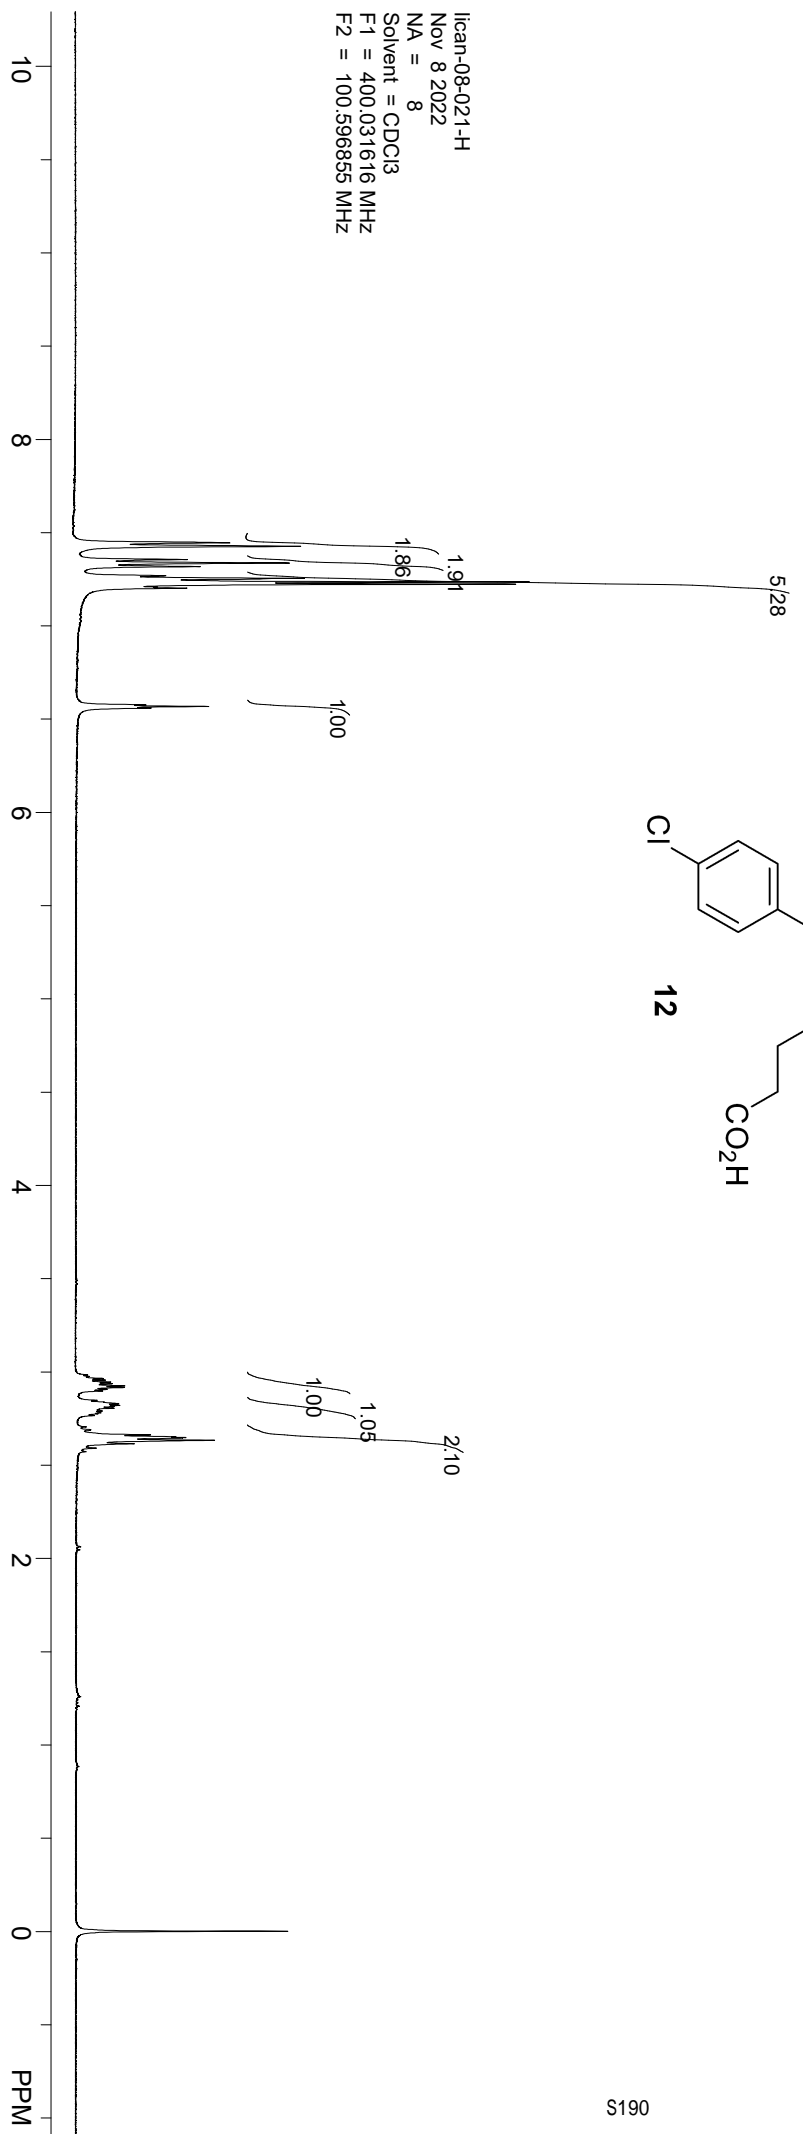

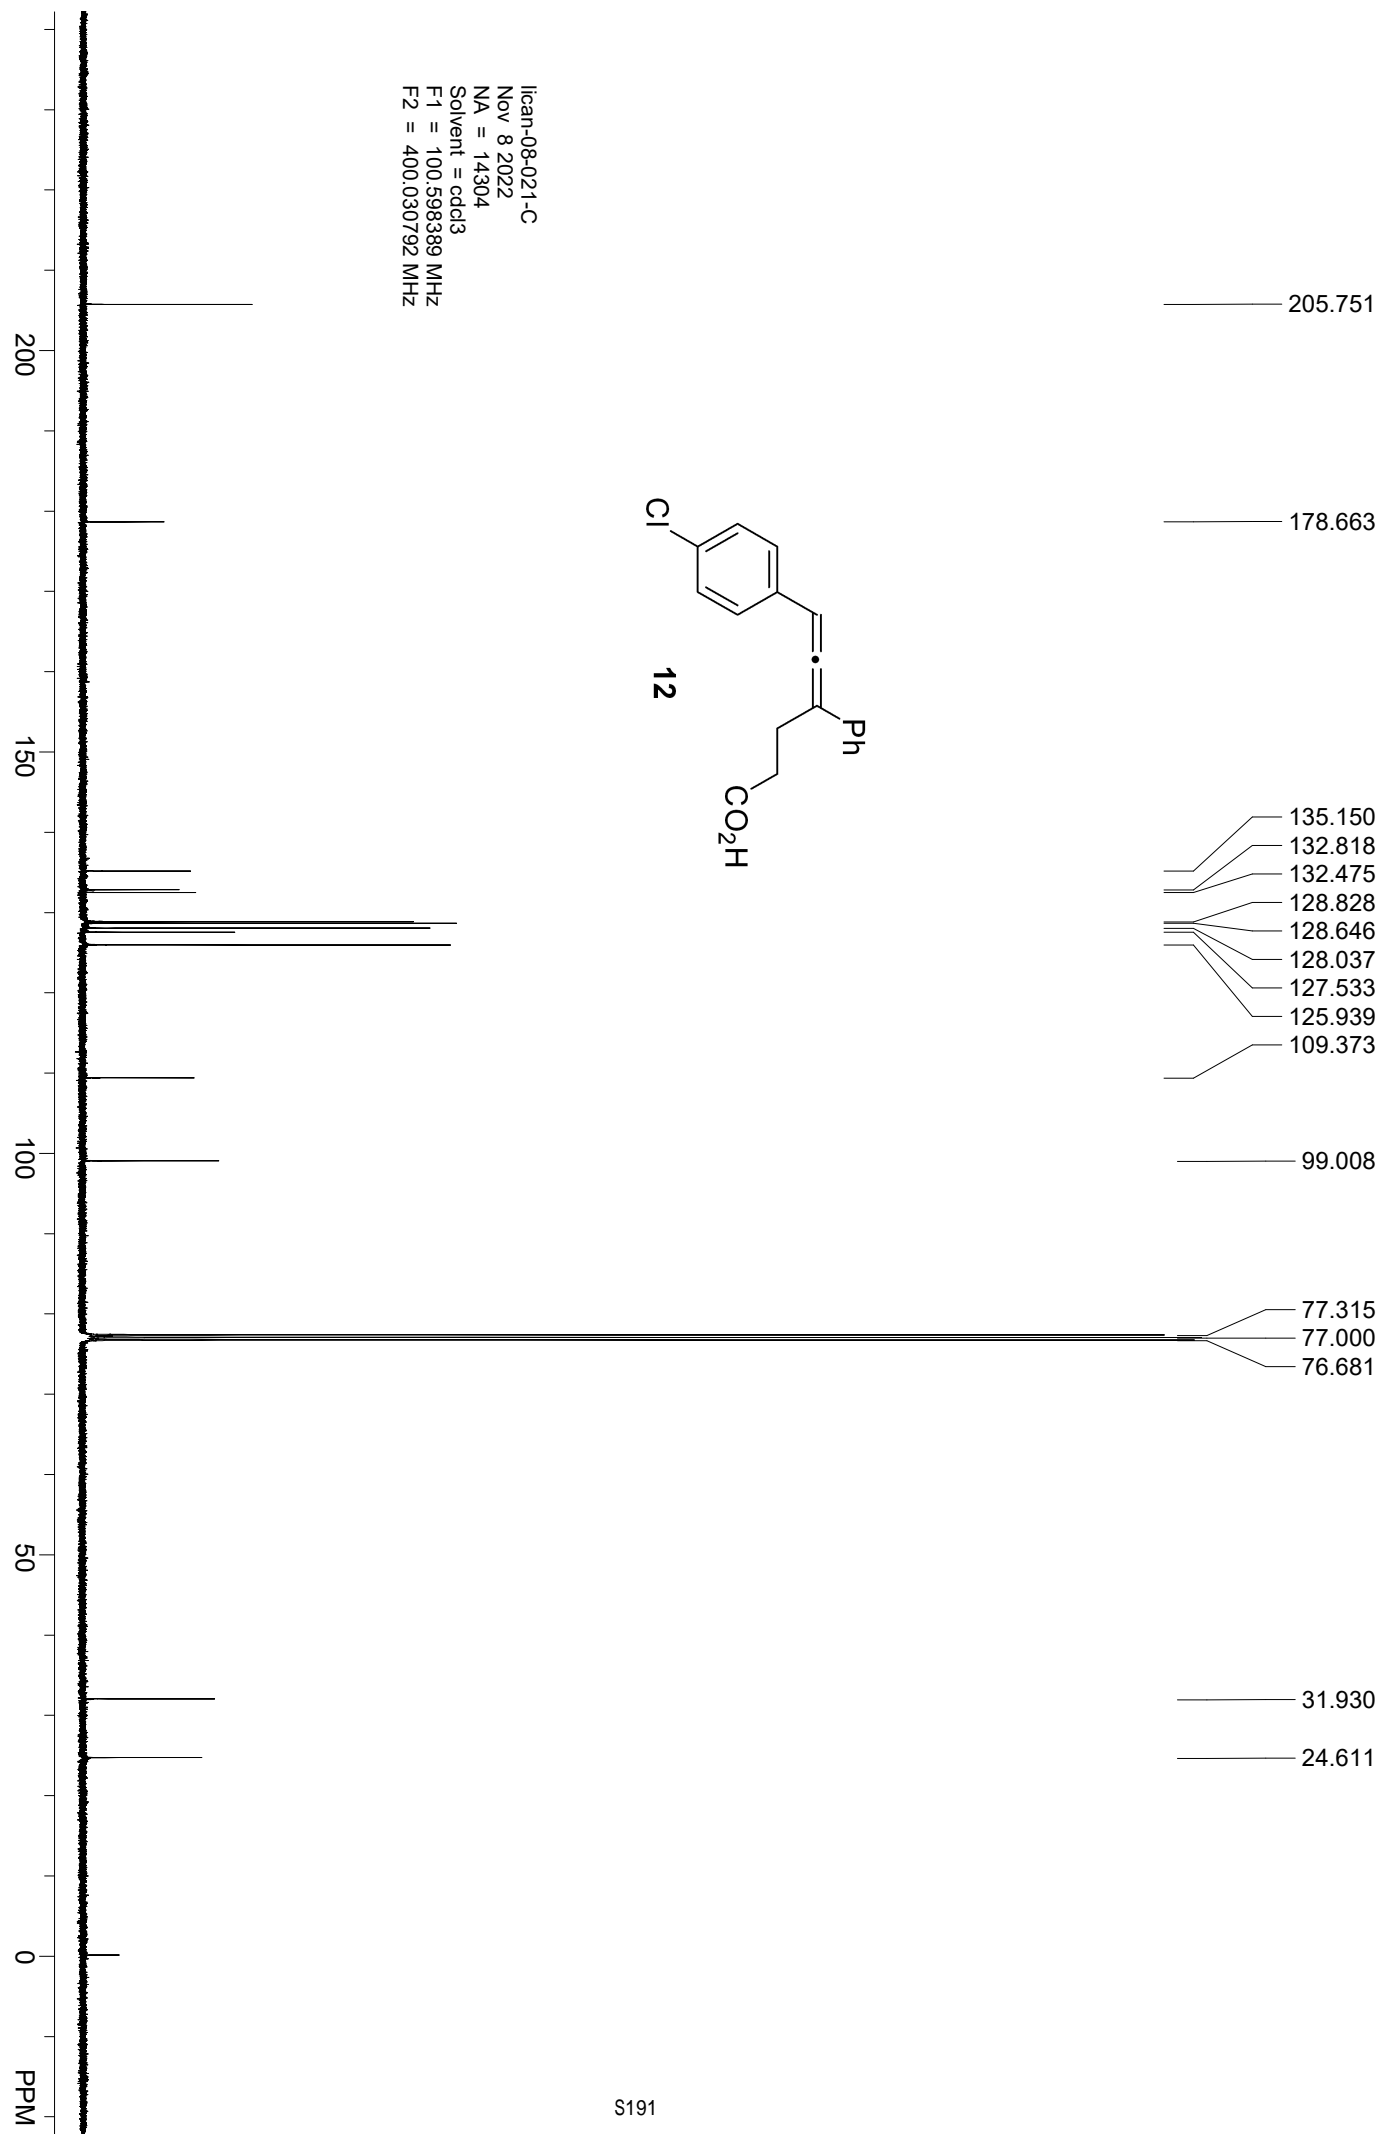

llican-08-021-C  
Nov 8 2022  
NA = 14304  
Solvent = cdd13  
F1 = 100.598389 MHz  
F2 = 400.030792 MHz

7.466  
7.448  
7.336  
7.318  
7.298  
7.271  
7.265  
7.249  
7.239  
7.225  
7.219  
7.207  
6.538  
6.530  
6.521

3.042  
3.024  
3.016  
3.003  
2.995  
2.983  
2.975  
2.966  
3.538  
2.958  
2.888  
2.879  
2.869  
2.863  
2.860  
2.854  
2.845  
2.830  
2.821  
2.816  
2.807  
2.763  
2.745  
2.728  
2.706  
2.690  
2.671  
2.649  
2.632  
-0.000

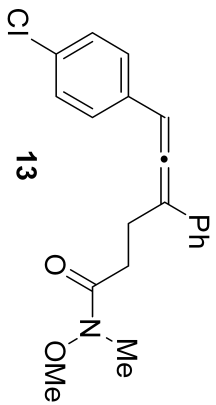

llean-08-024-H  
Nov 9 2022  
NA = 8  
Solvent = CDCl3  
F1 = 400.031616 MHz  
F2 = 100.596855 MHz

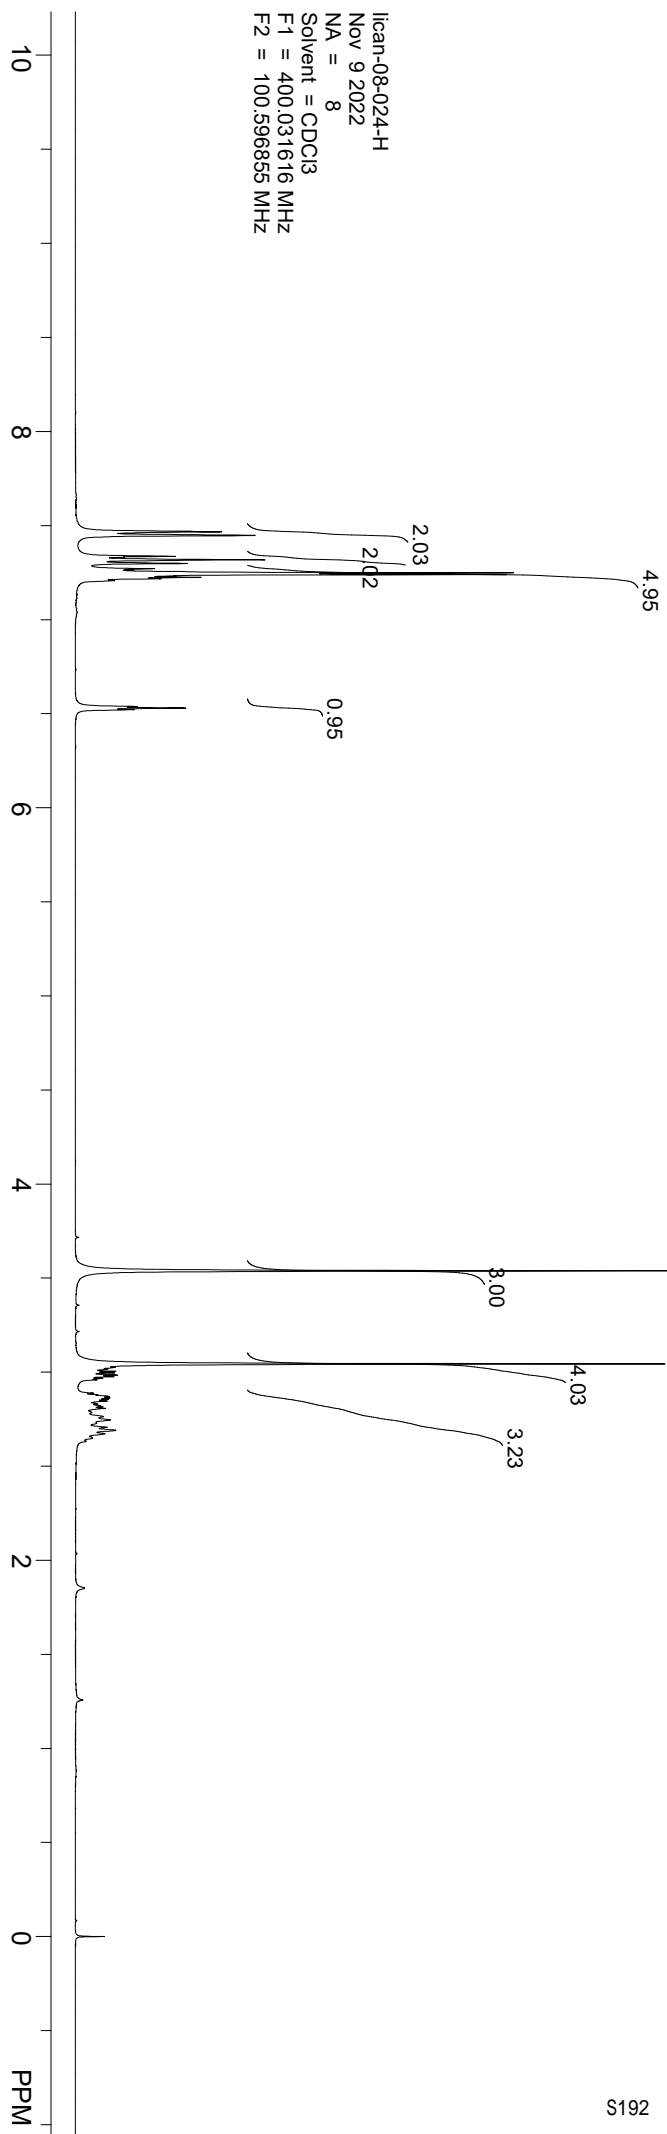



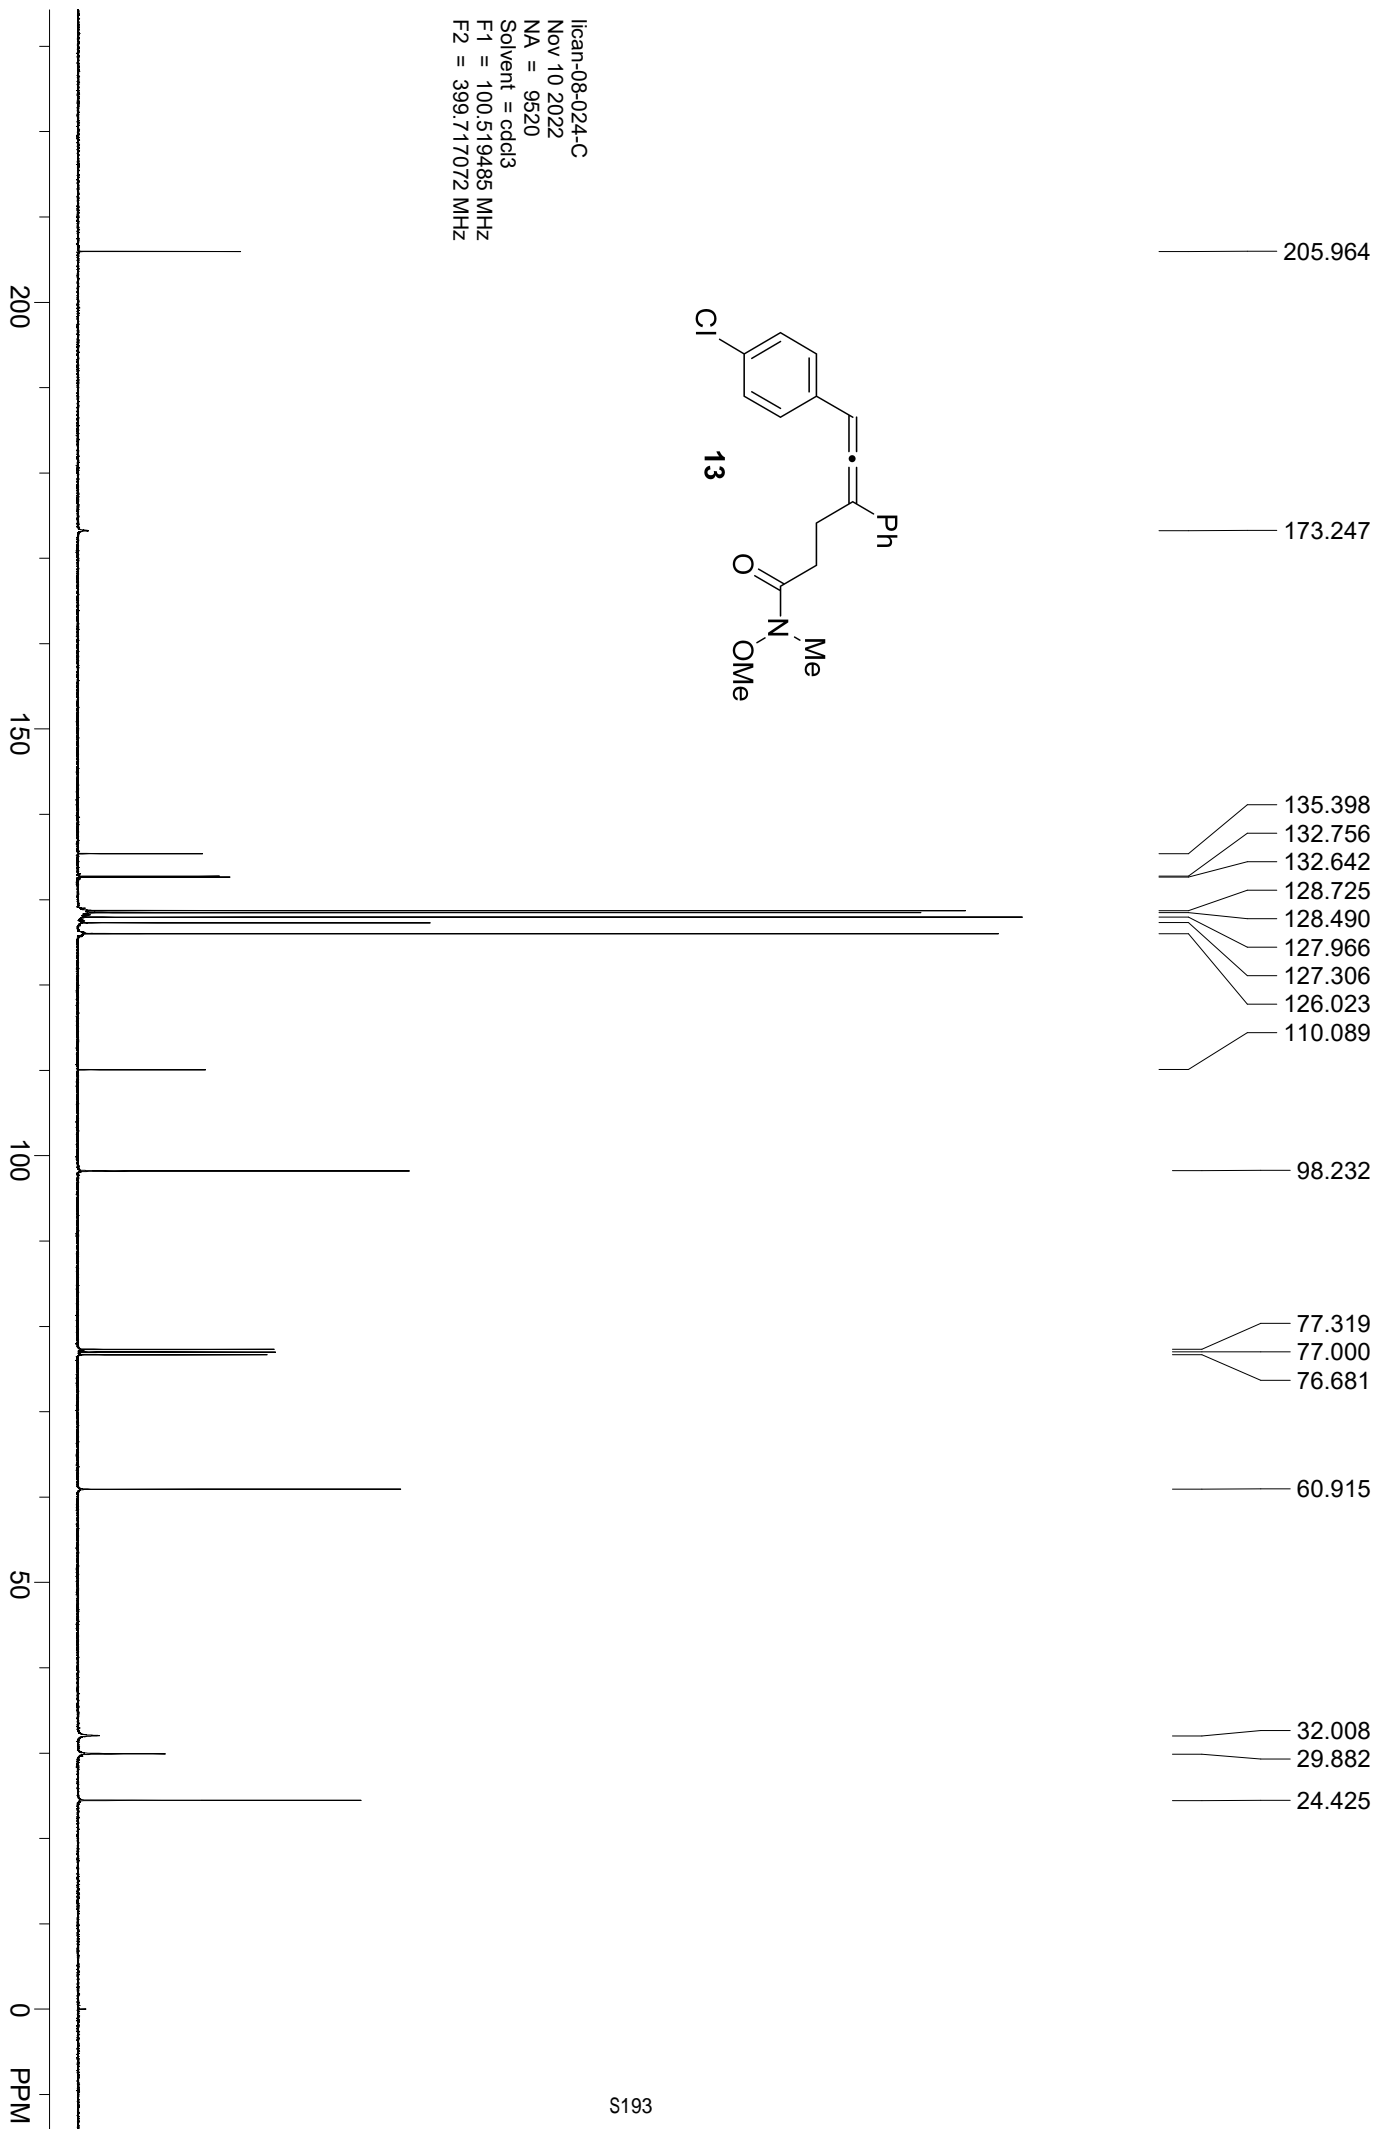

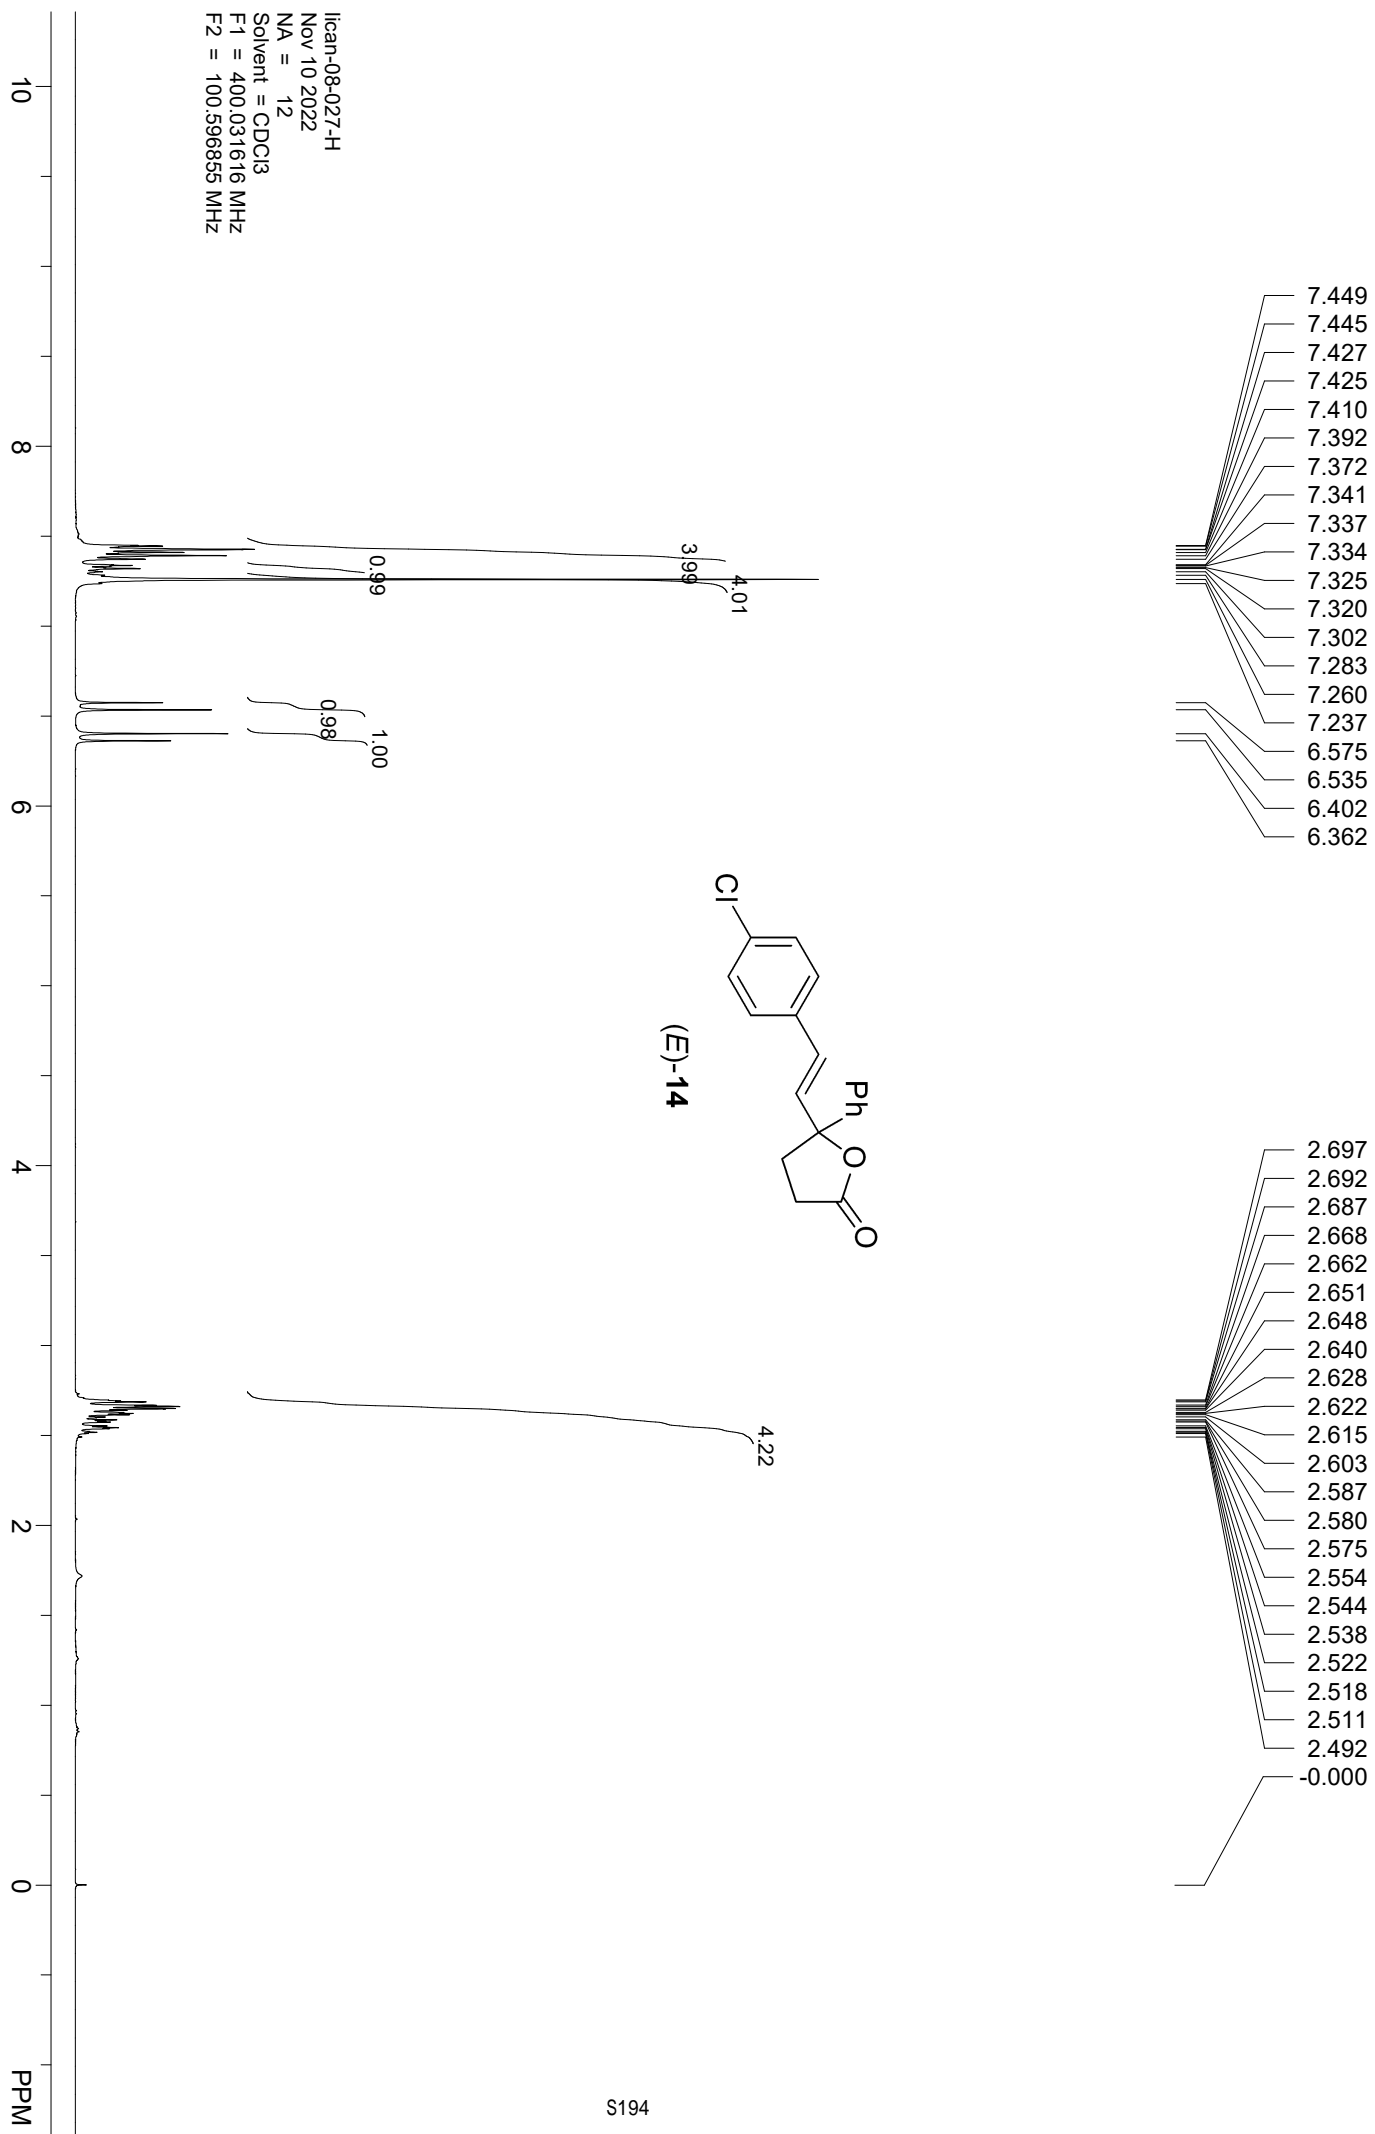

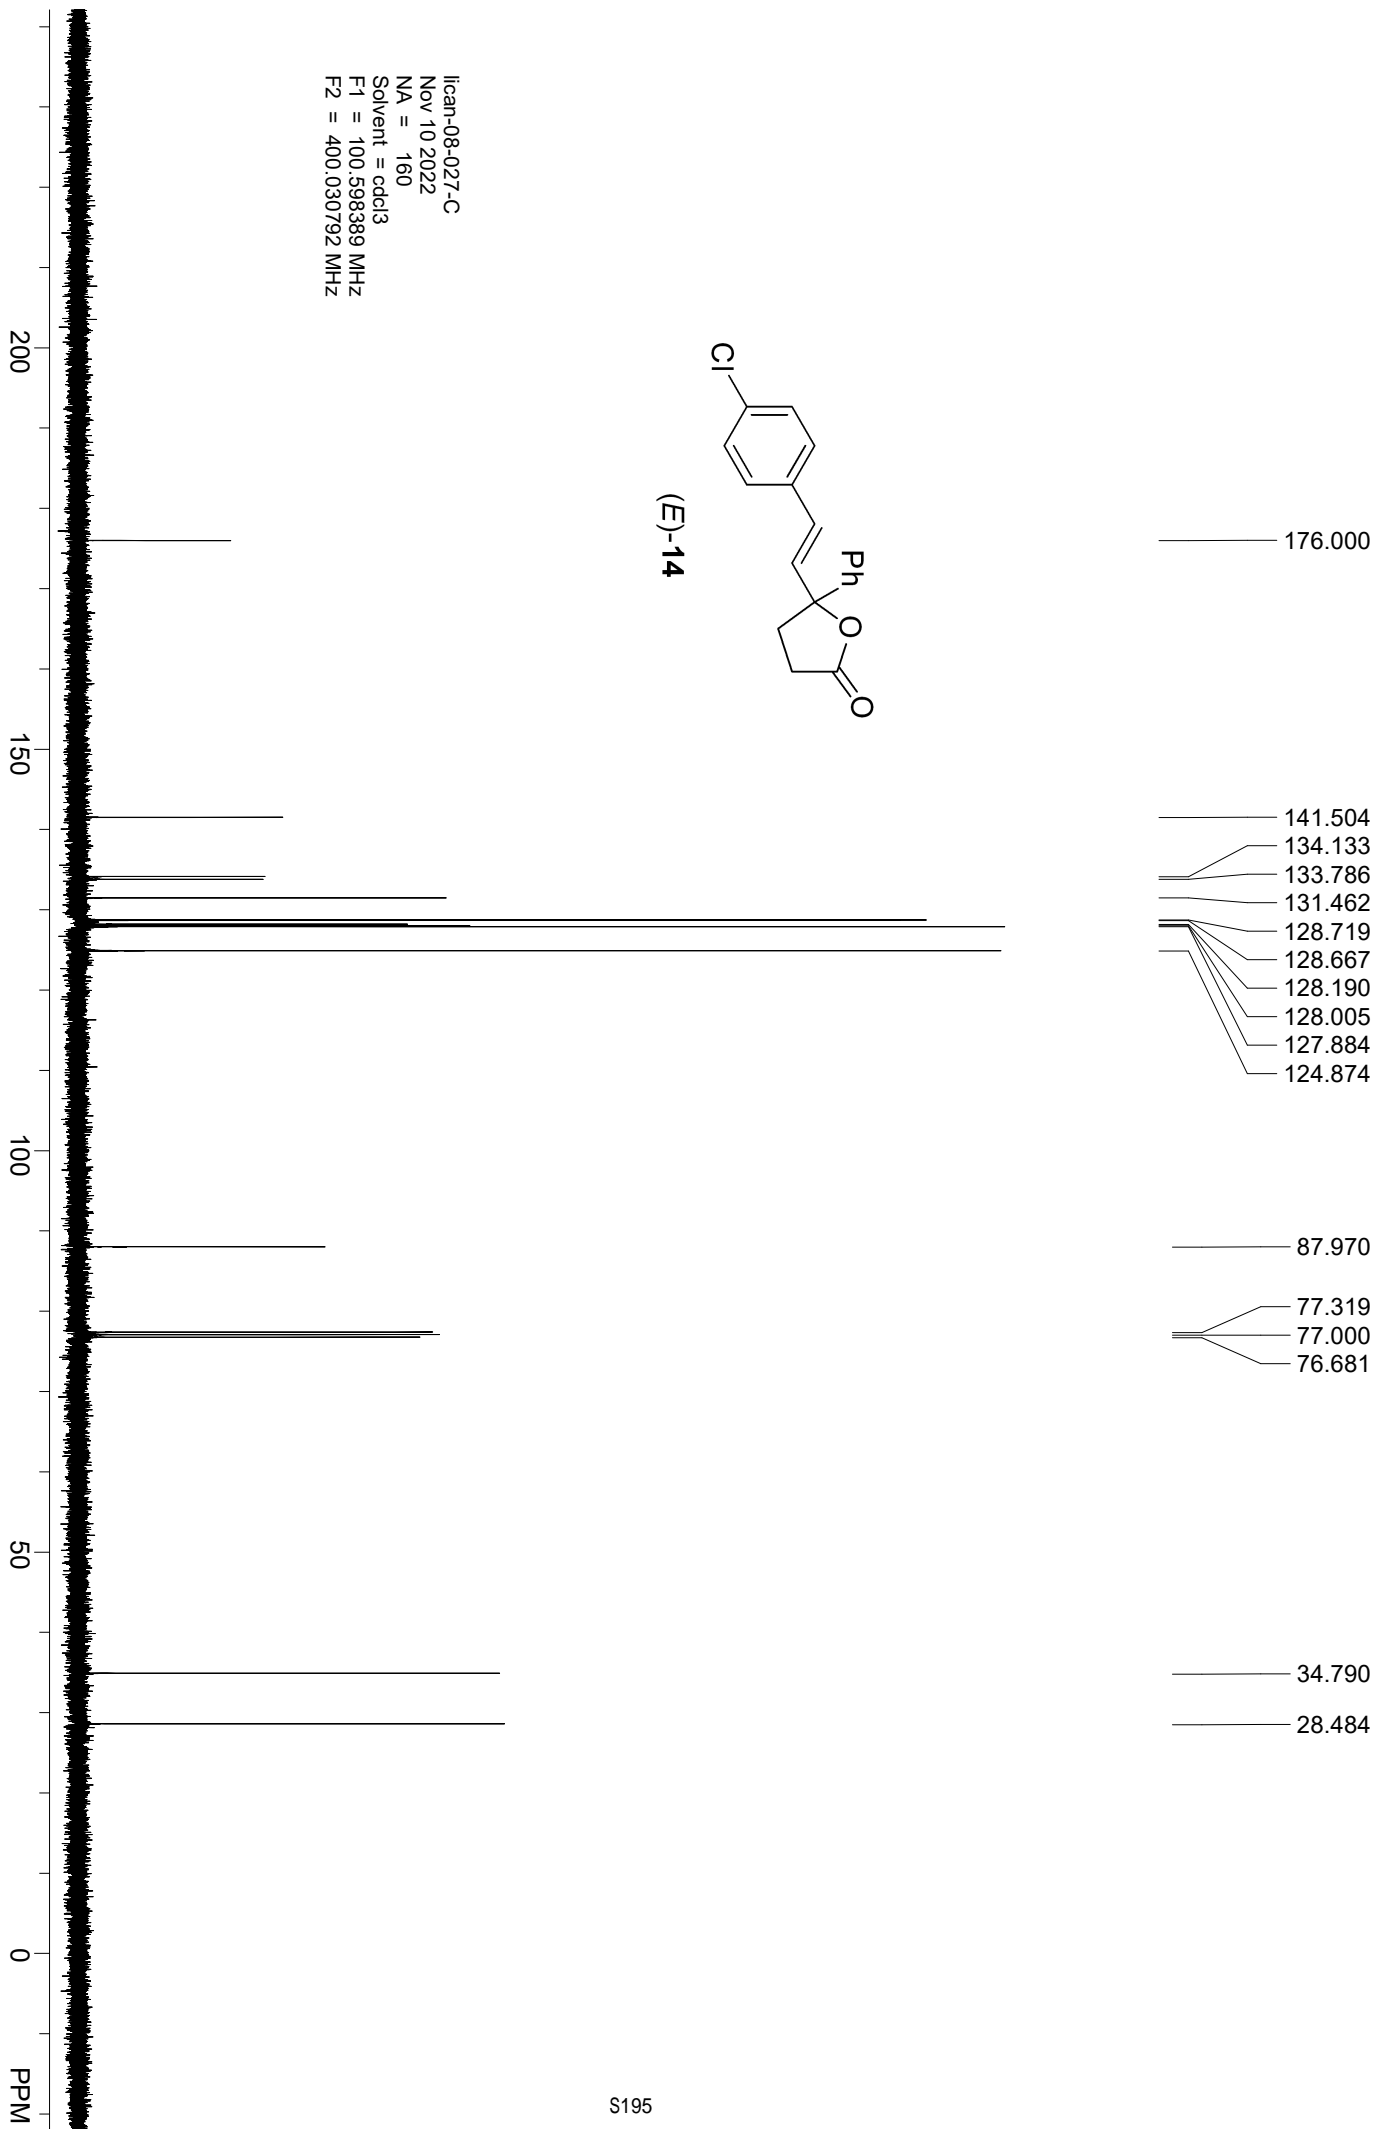

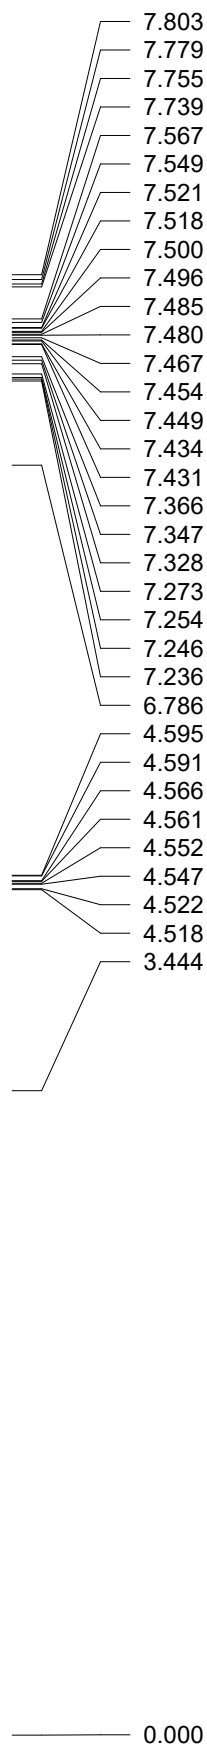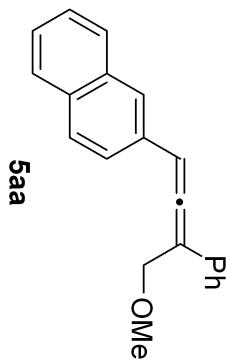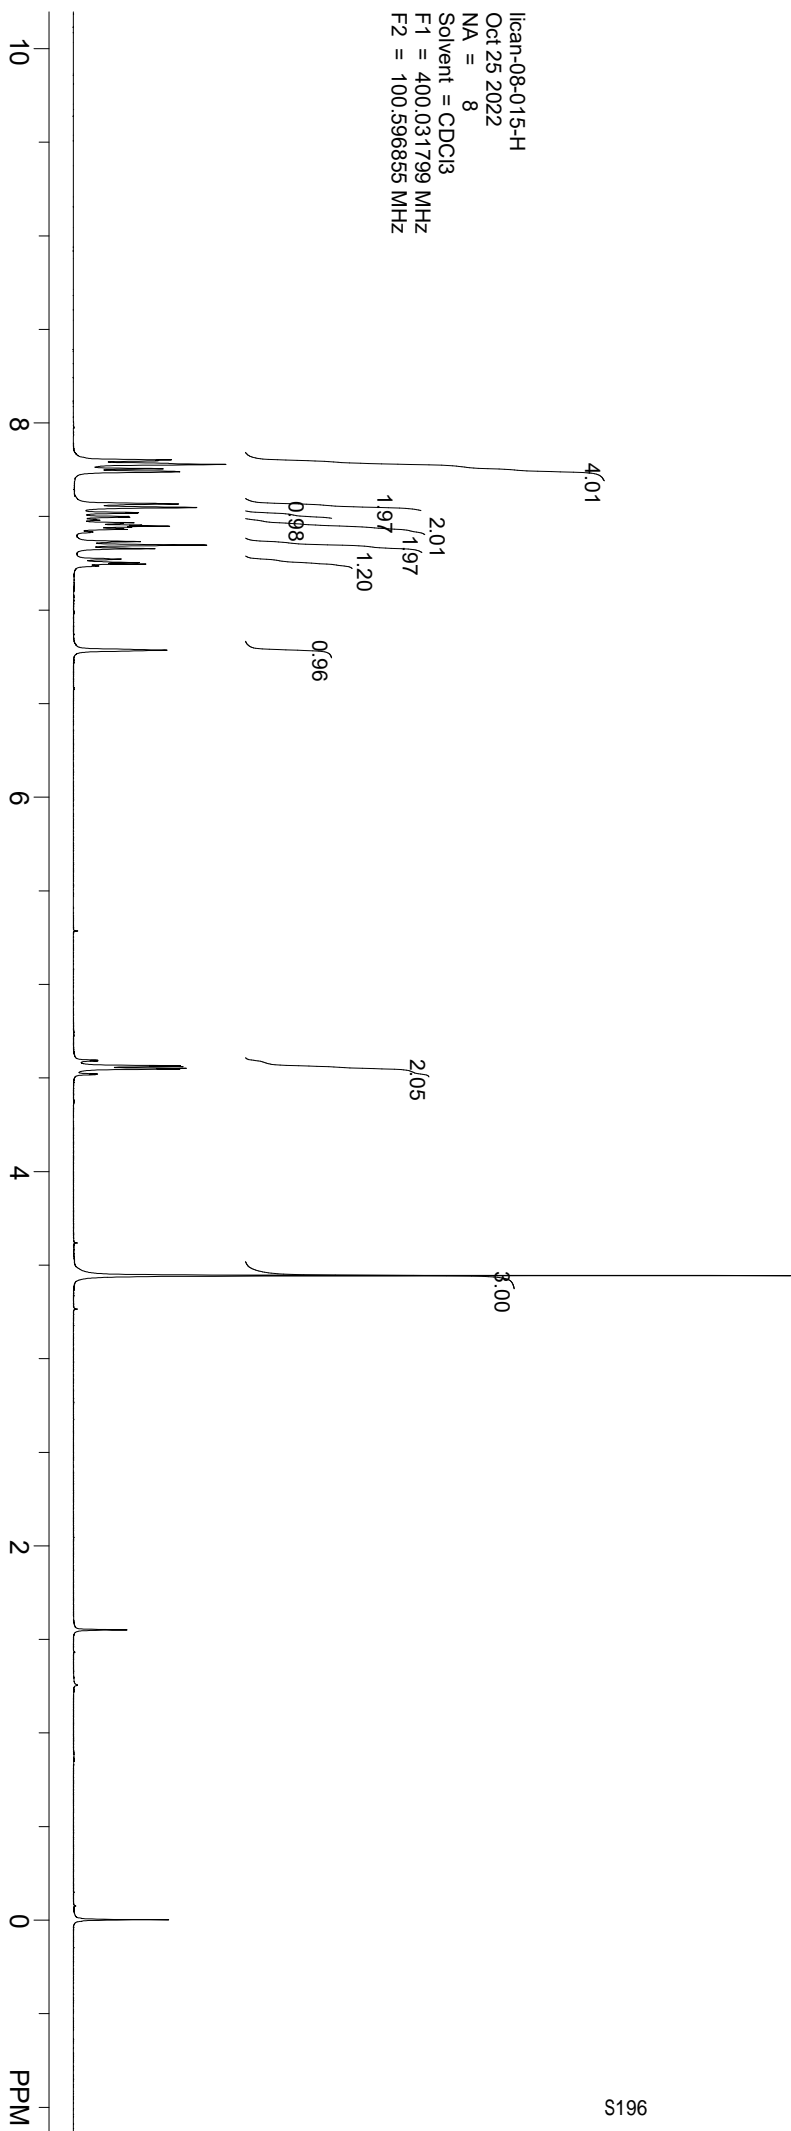

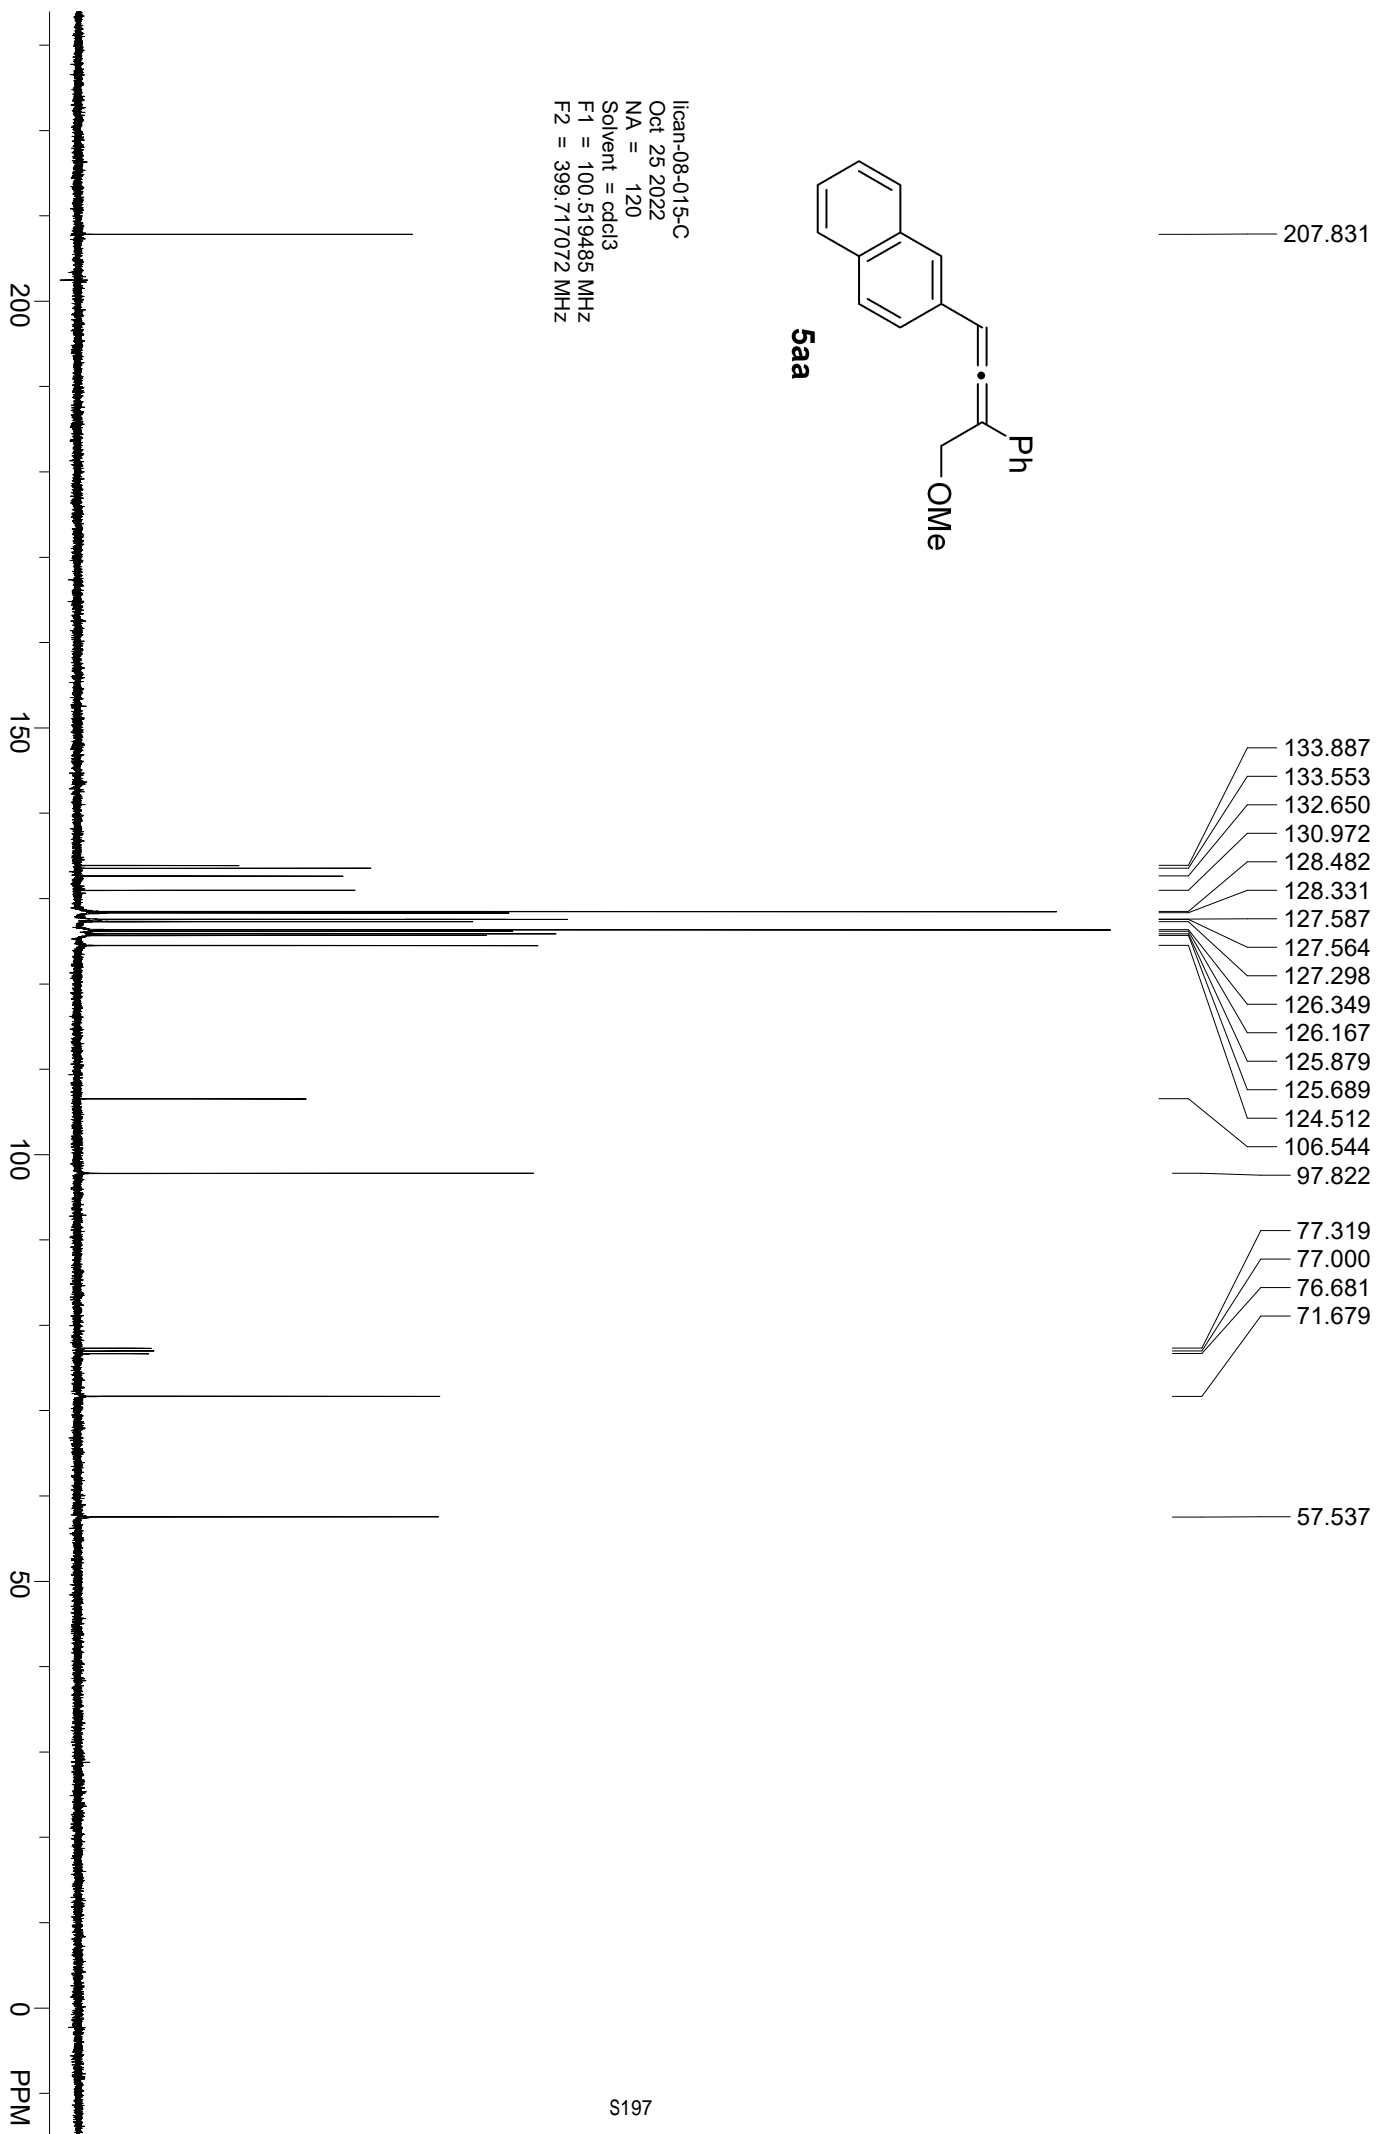

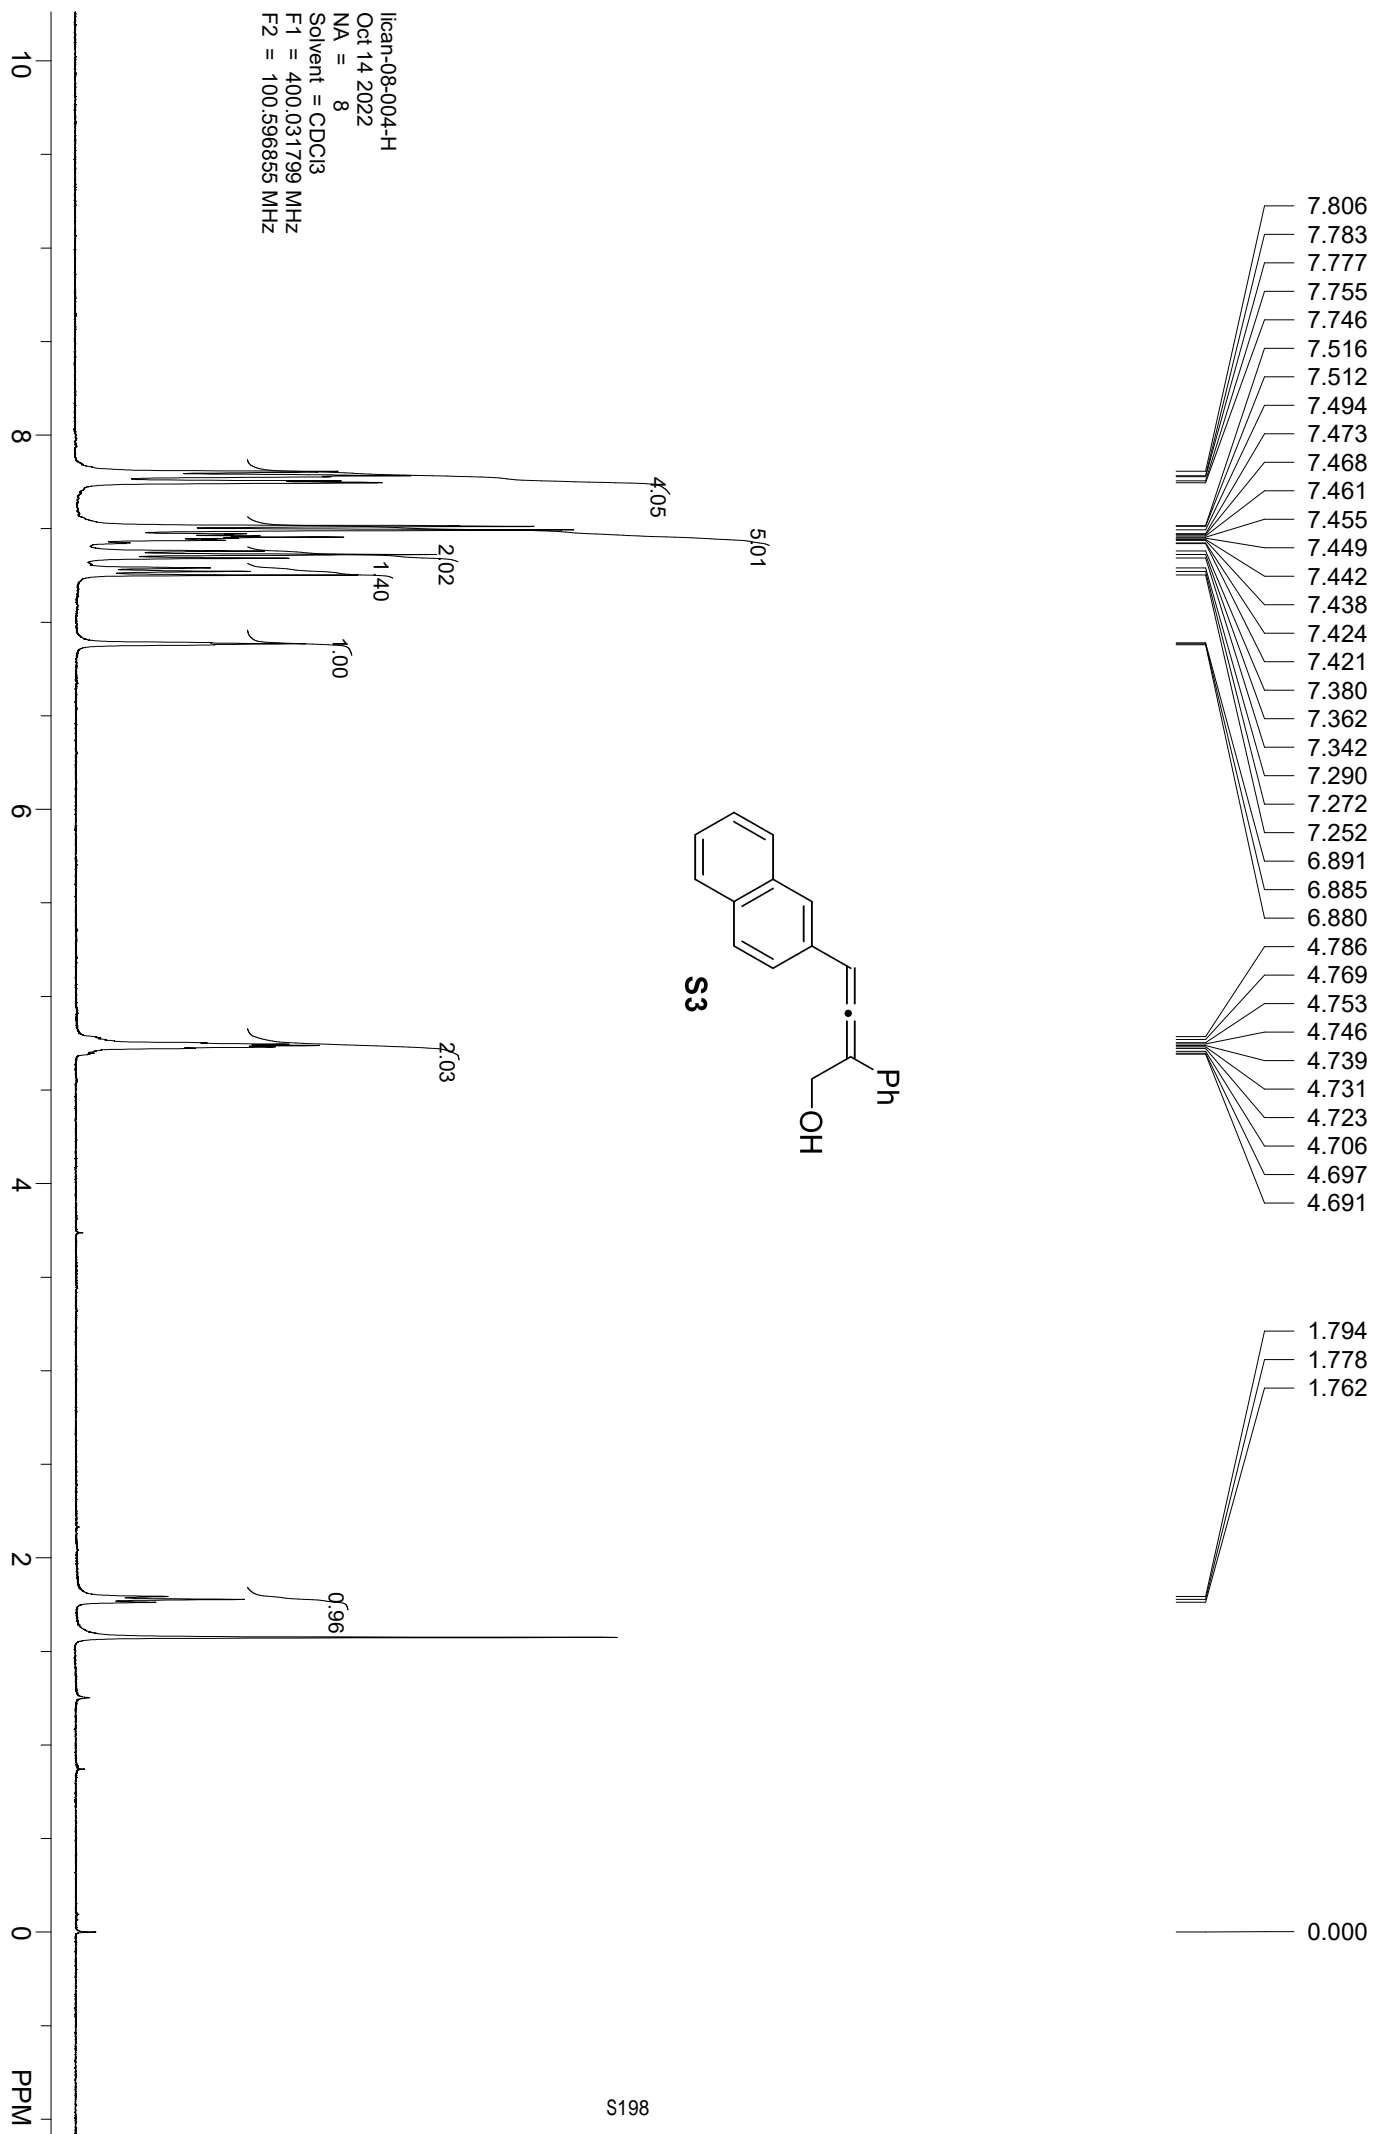

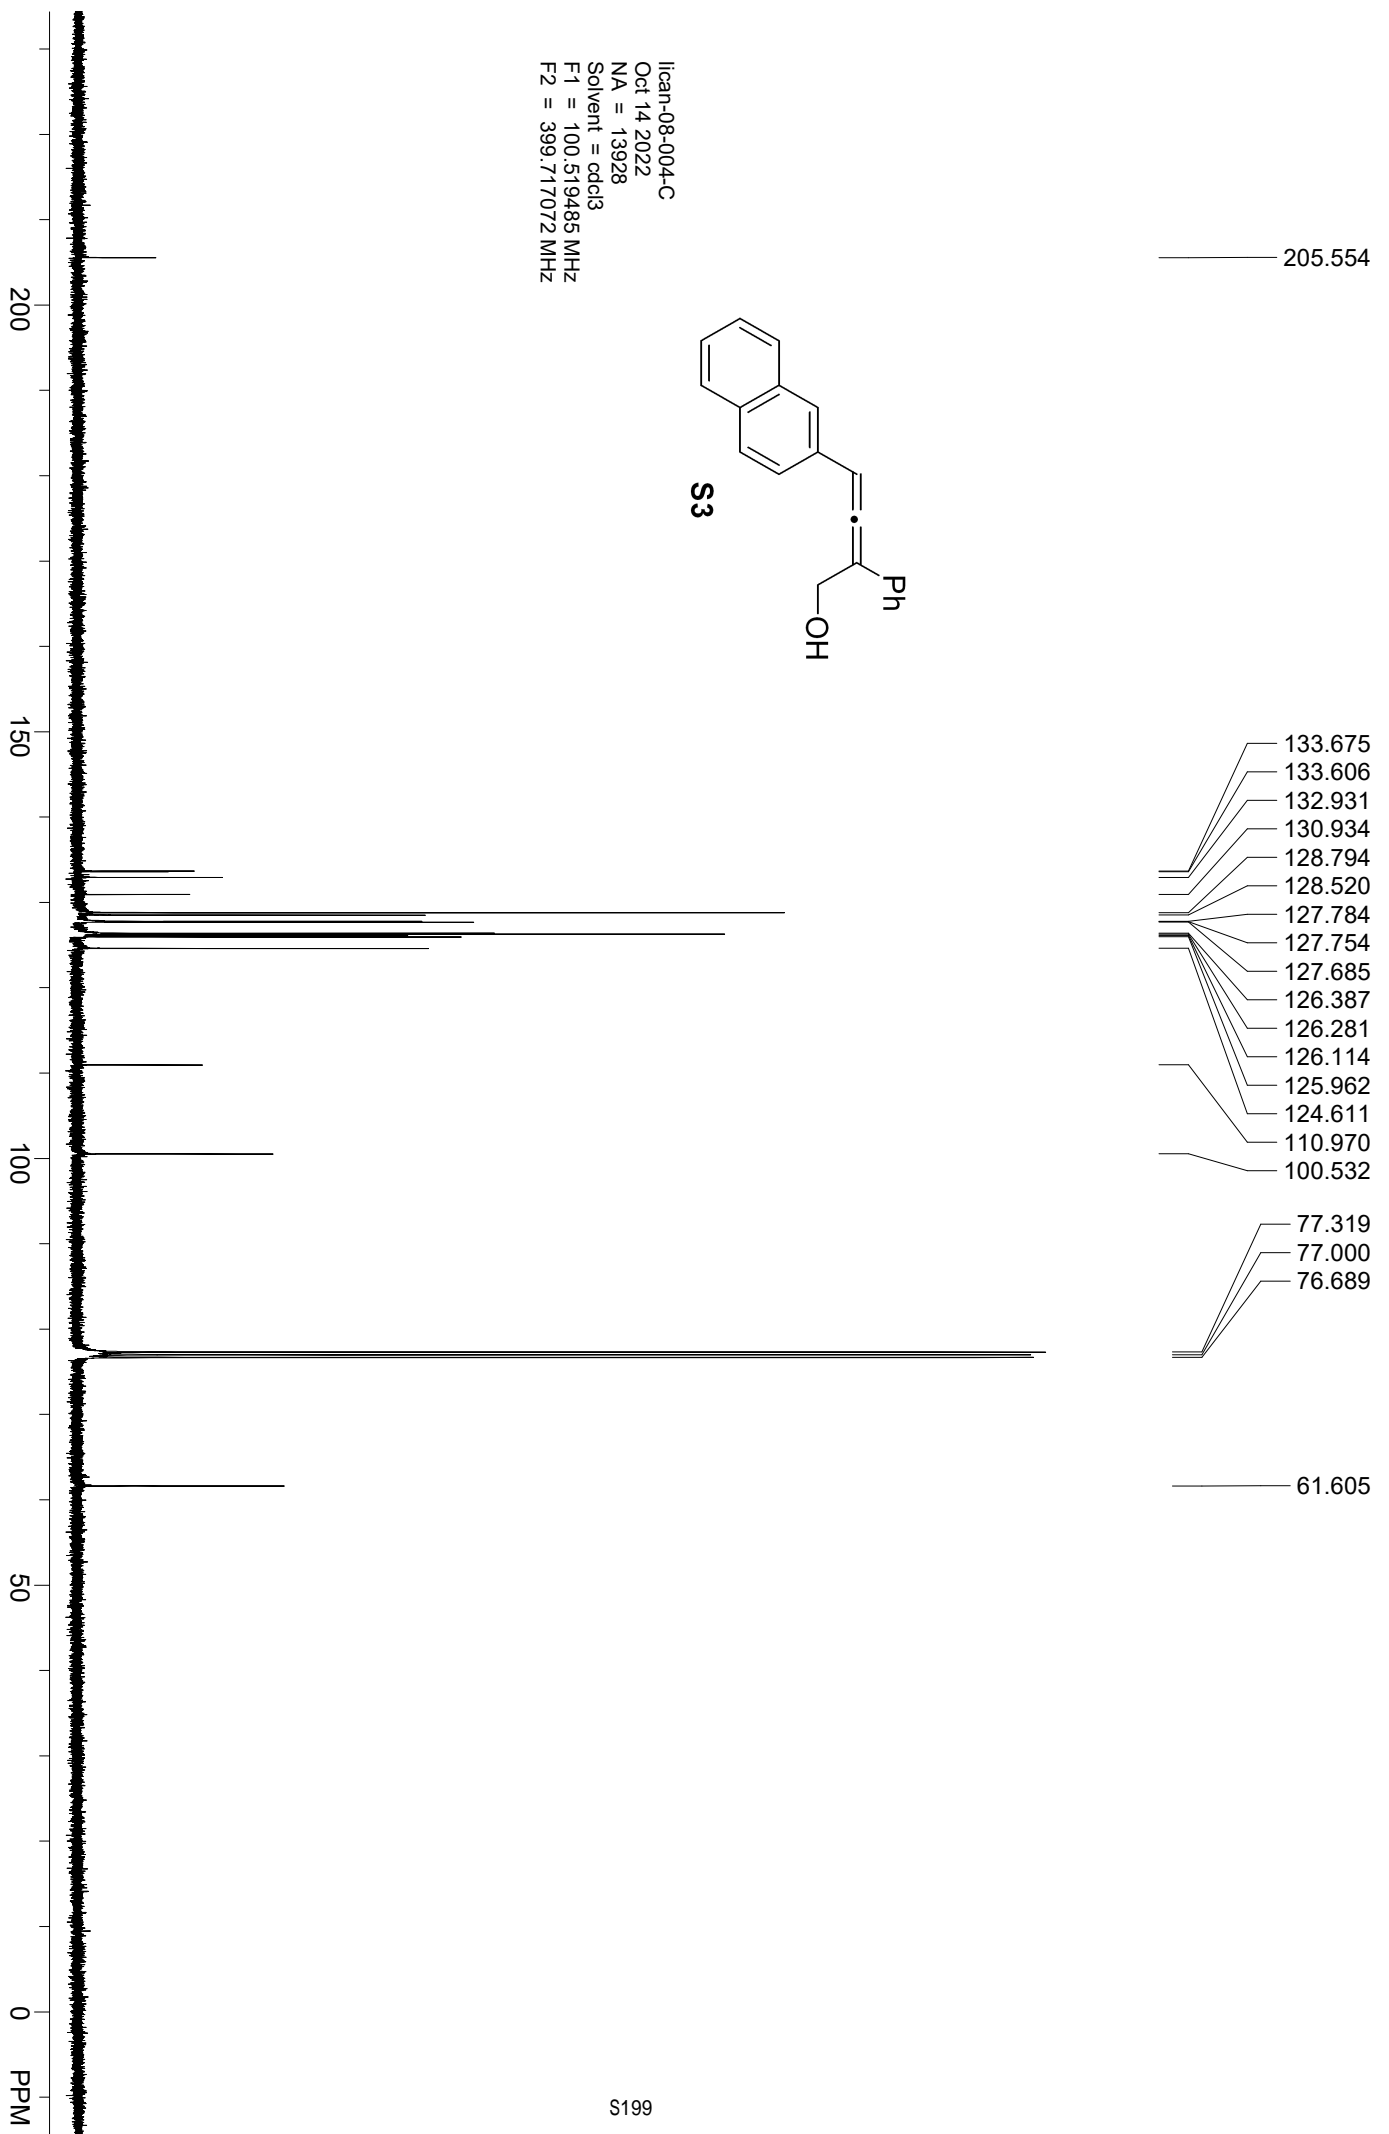

- 7.806
- 7.782
- 7.758
- 7.742
- 7.507
- 7.503
- 7.485
- 7.482
- 7.463
- 7.453
- 7.445
- 7.440
- 7.436
- 7.422
- 7.371
- 7.352
- 7.333
- 7.284
- 7.266
- 7.248
- 6.858
- 5.298
- 5.293
- 5.267
- 5.262
- 5.201
- 5.197
- 5.171
- 5.166
- 3.729

0.000

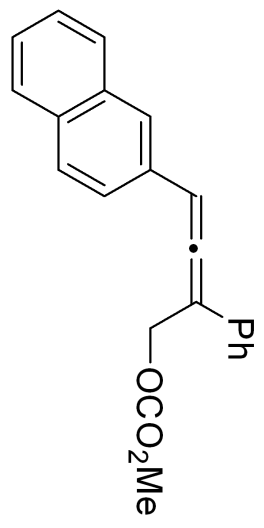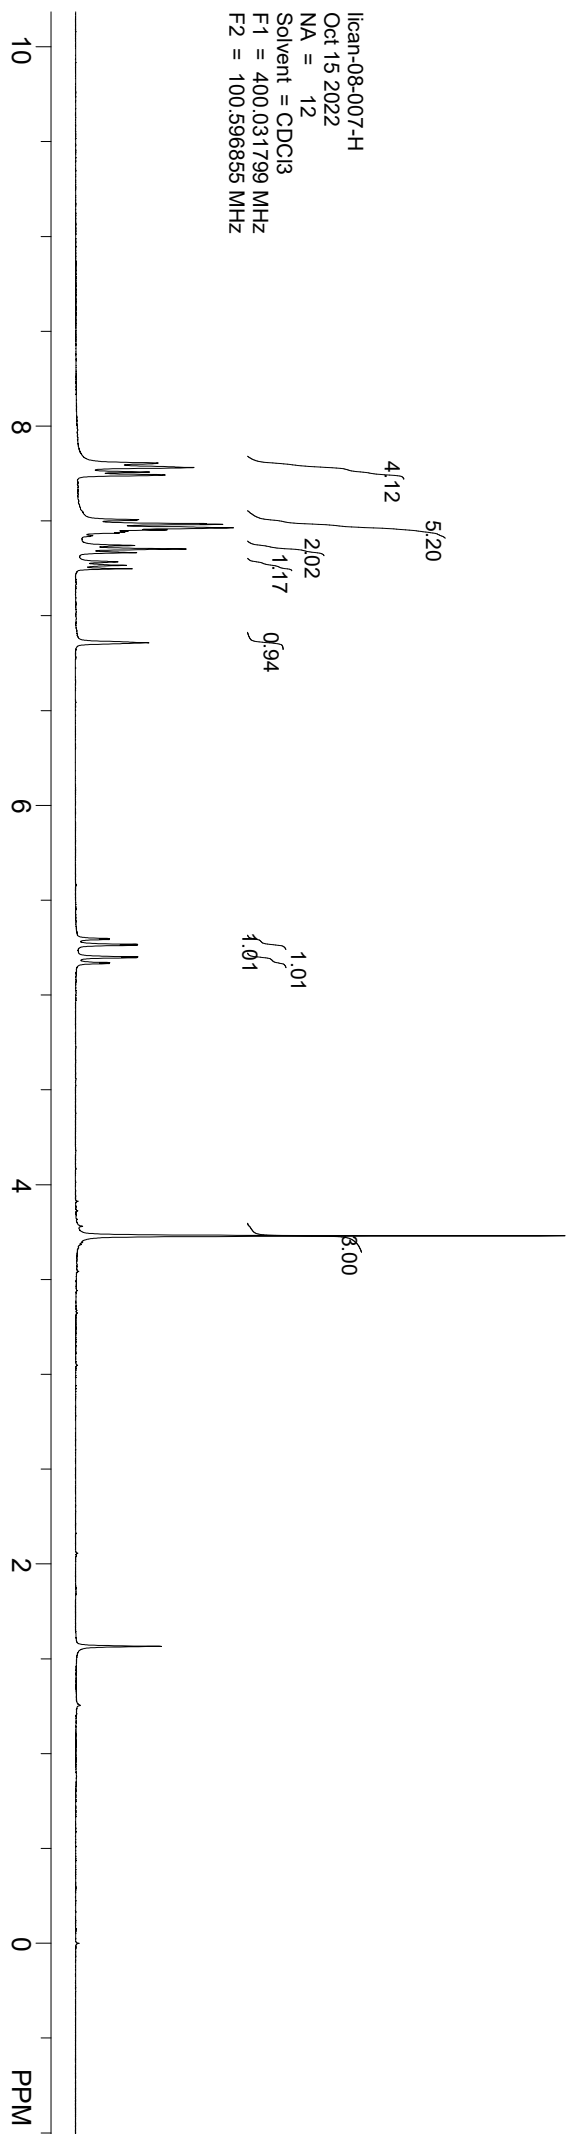



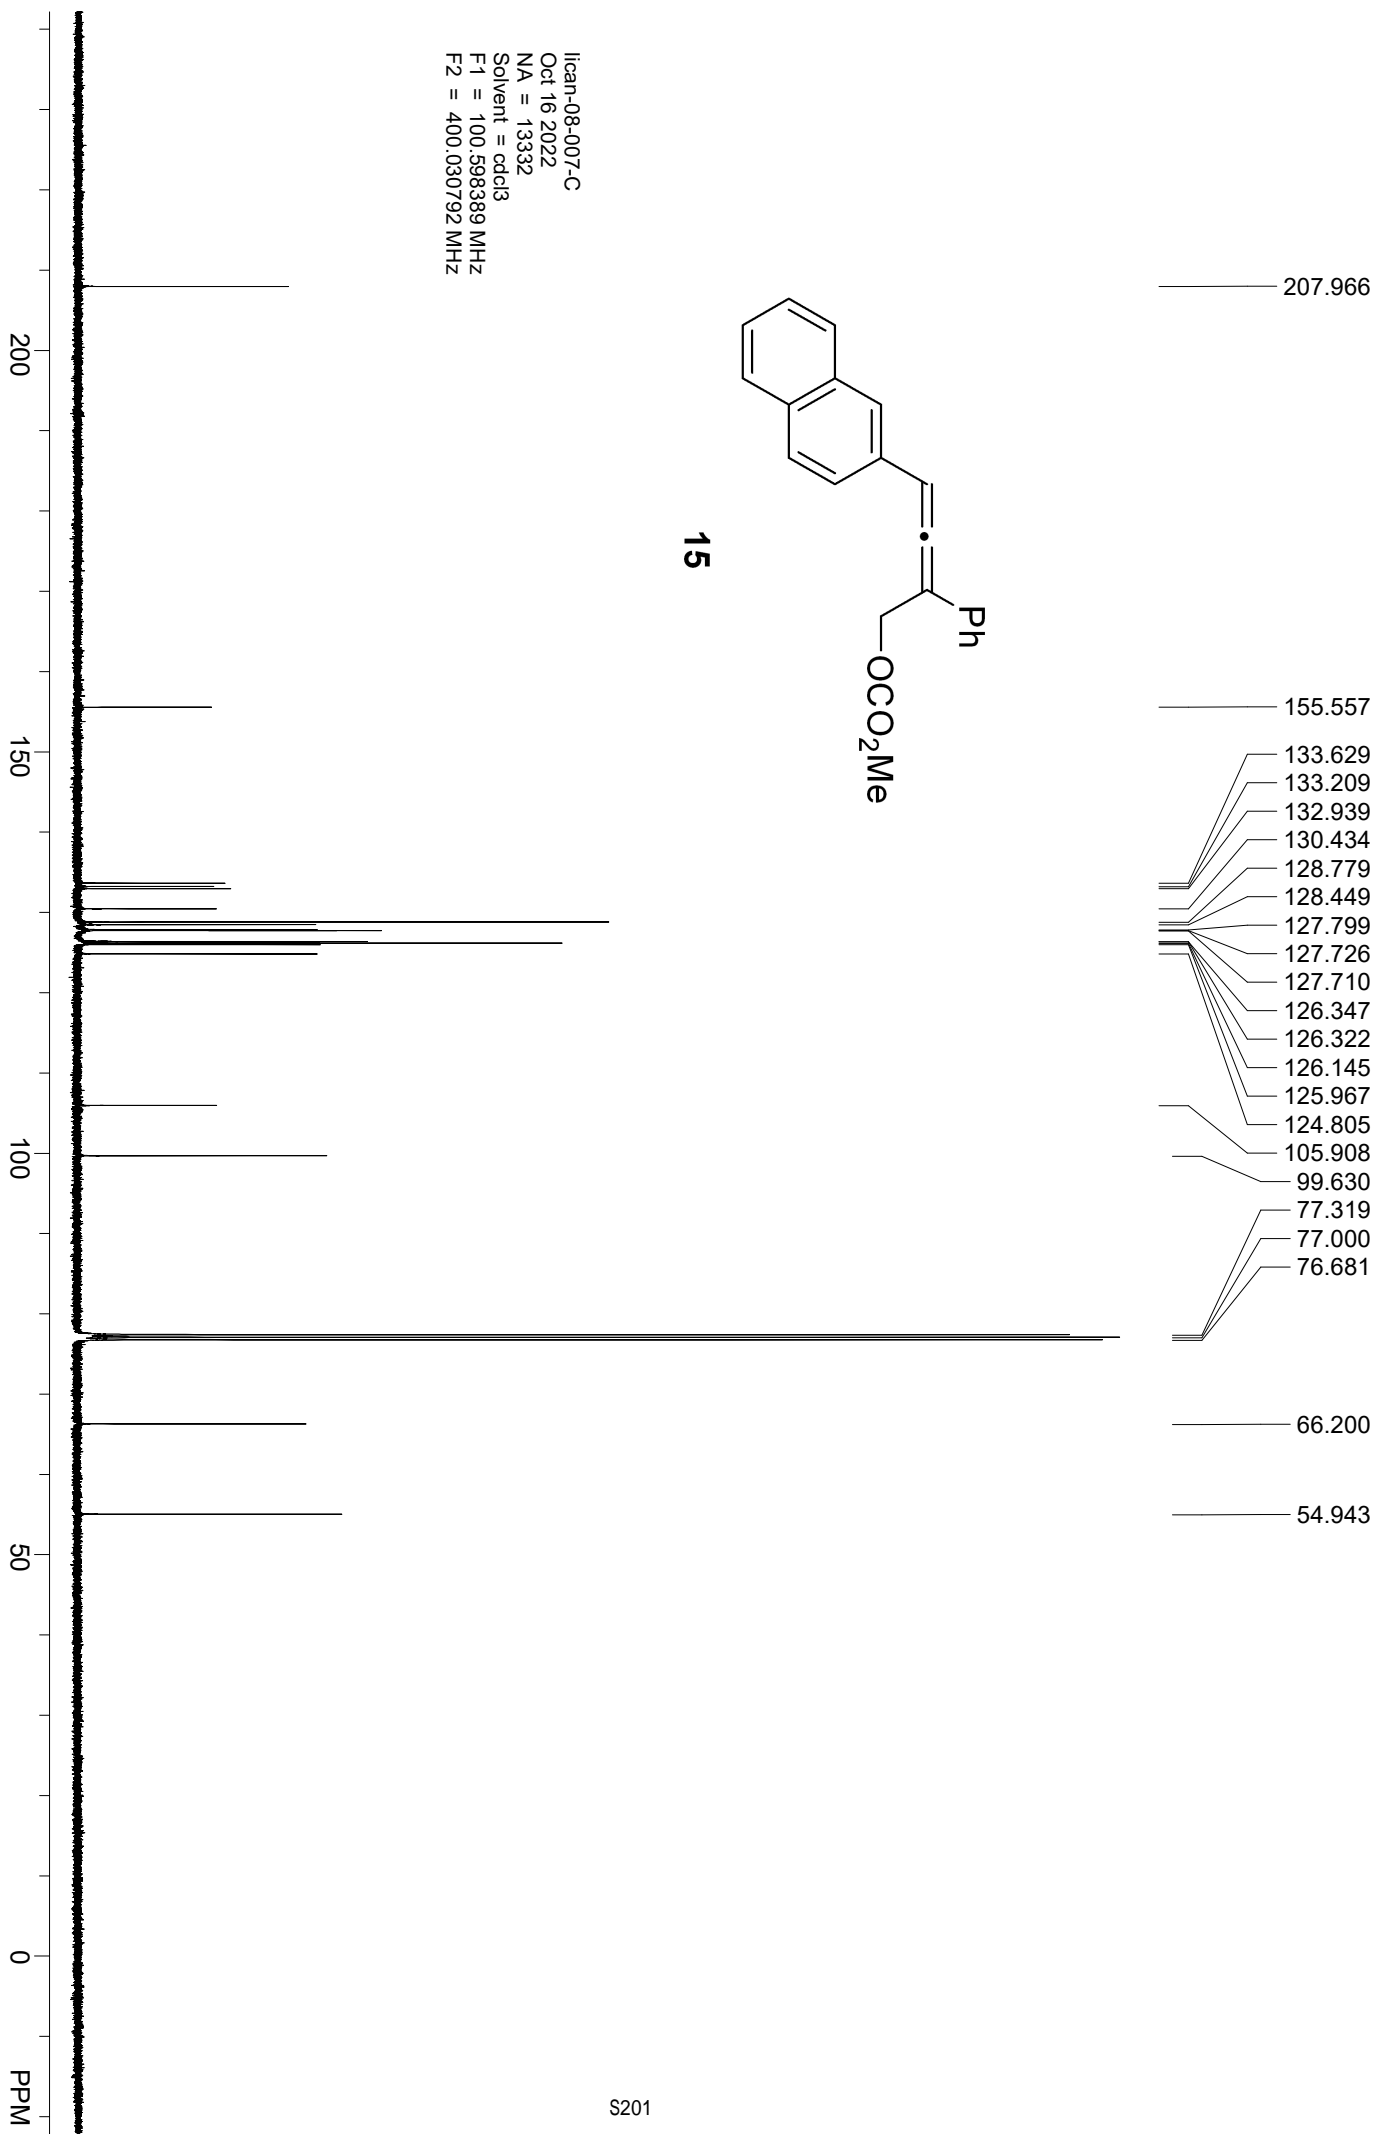

- 7.650
- 7.641
- 7.631
- 7.618
- 7.533
- 7.518
- 7.509
- 7.502
- 7.478
- 7.475
- 7.457
- 7.455
- 7.431
- 7.365
- 7.362
- 7.344
- 7.330
- 7.325
- 7.321
- 7.318
- 7.307
- 7.294
- 7.289
- 7.274
- 7.271
- 6.908
- 6.903
- 6.886
- 6.882
- 6.698
- 5.330
- 5.326
- 5.088
- 5.085

0.000

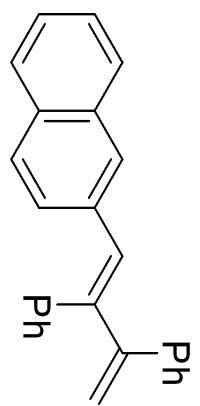

**(E)-16**

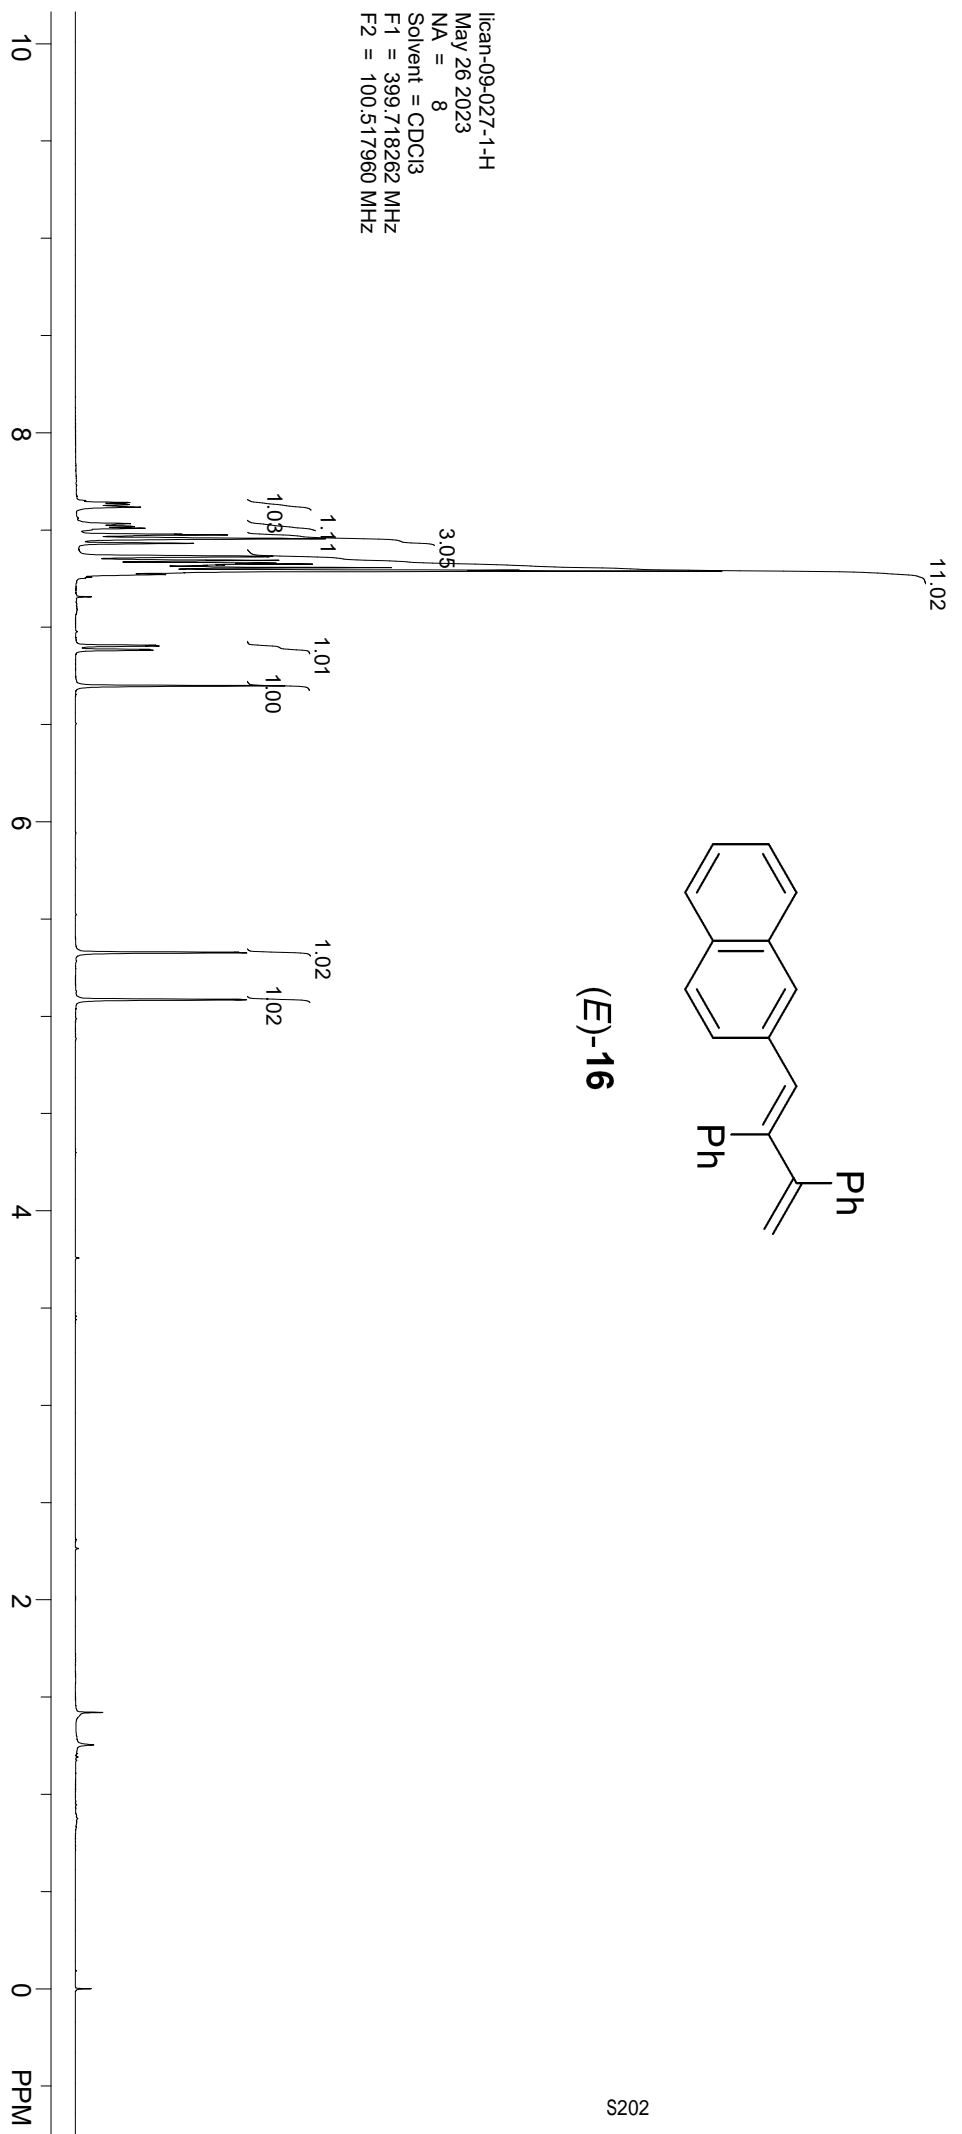

lican-09-027-1-H  
 May 26 2023  
 NA = 8  
 Solvent = CDCl3  
 F1 = 399.718262 MHz  
 F2 = 100.517960 MHz

lican-09-027-1-C  
May 26 2023  
NA = 76  
Solvent = cdcl3  
F1 = 100.519737 MHz  
F2 = 399.717072 MHz

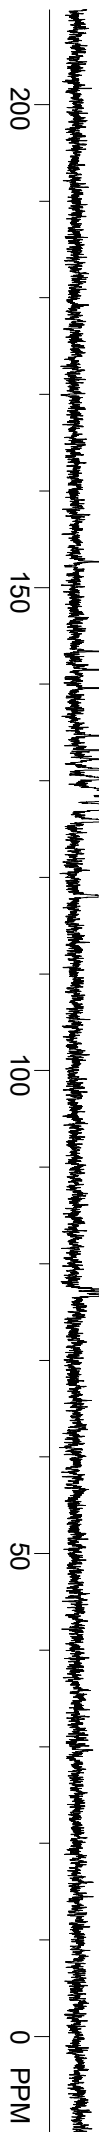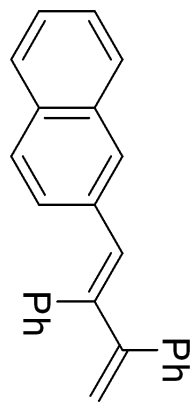

(E)-16

- 143.383
- 152.656
- 141.468
- 139.579
- 134.628
- 133.147
- 132.215
- 131.170
- 130.183
- 129.099
- 128.791
- 128.584
- 128.125
- 127.939
- 127.395
- 127.370
- 127.315
- 127.108
- 127.011
- 125.848
- 125.831
- 118.033
- 77.316
- 77.000
- 76.679

- 7.866
- 7.738
- 7.723
- 7.715
- 7.698
- 7.659
- 7.655
- 7.637
- 7.633
- 7.625
- 7.604
- 7.579
- 7.561
- 7.424
- 7.411
- 7.407
- 7.400
- 7.393
- 7.389
- 7.376
- 7.324
- 7.307
- 7.291
- 7.287
- 7.274
- 7.258
- 7.255
- 7.245
- 7.241
- 7.231
- 7.226
- 7.214
- 7.196
- 5.924
- 5.325

-0.000

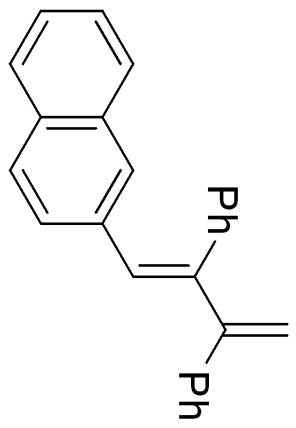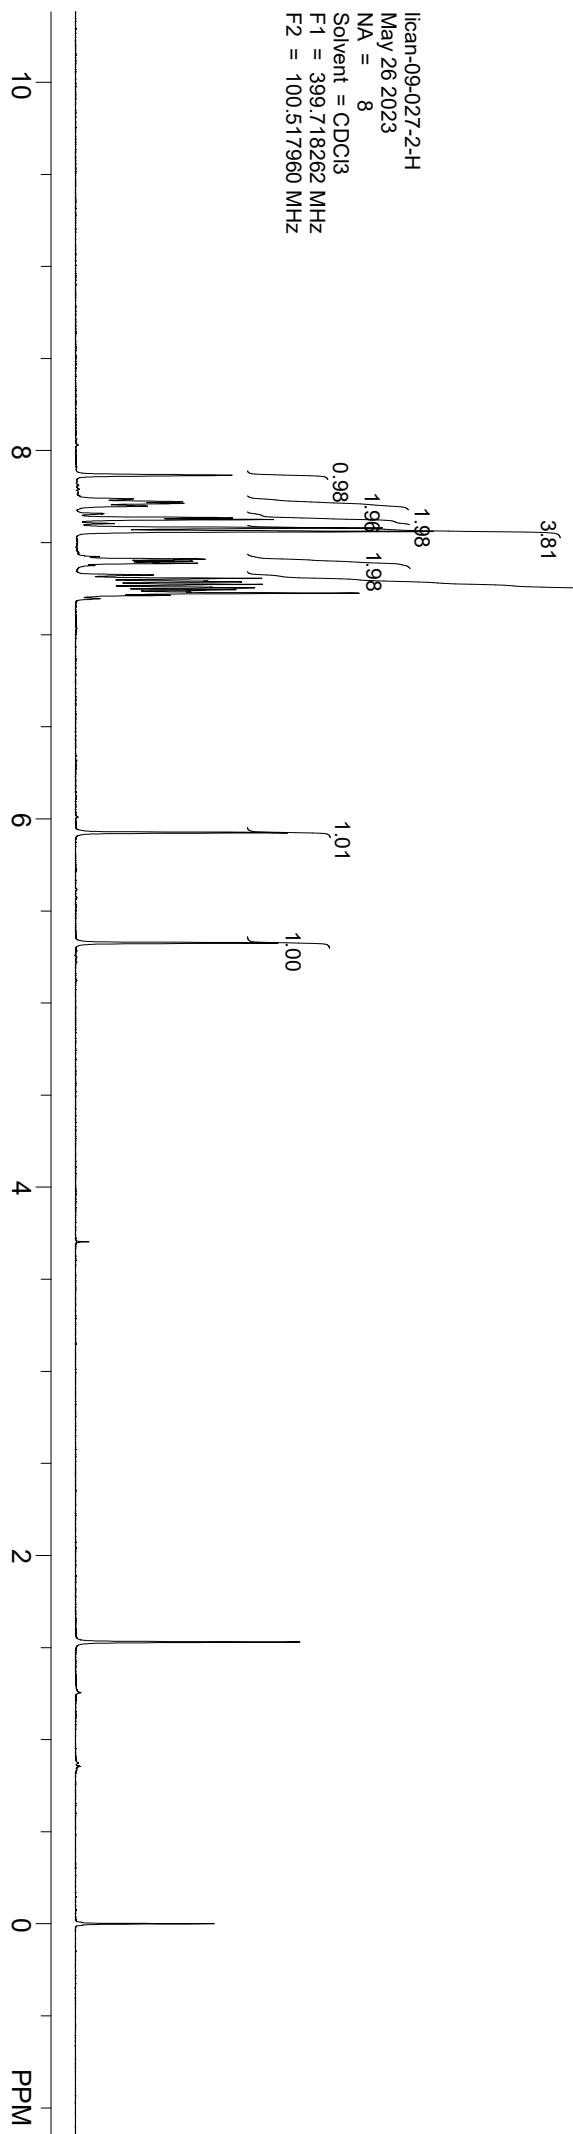

7.866  
7.736  
7.722  
7.715  
7.699

5.927

5.327

4.917

0.000

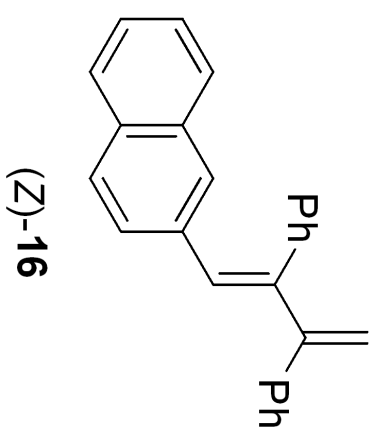

lican-09-027-2-purity  
May 28 2023  
purity = 98%  
28.9 mg product with 35 uL dibromomethane  
NA = 4  
Solvent = cdcl3  
F1 = 400.031403 MHz  
F2 = 100.596855 MHz

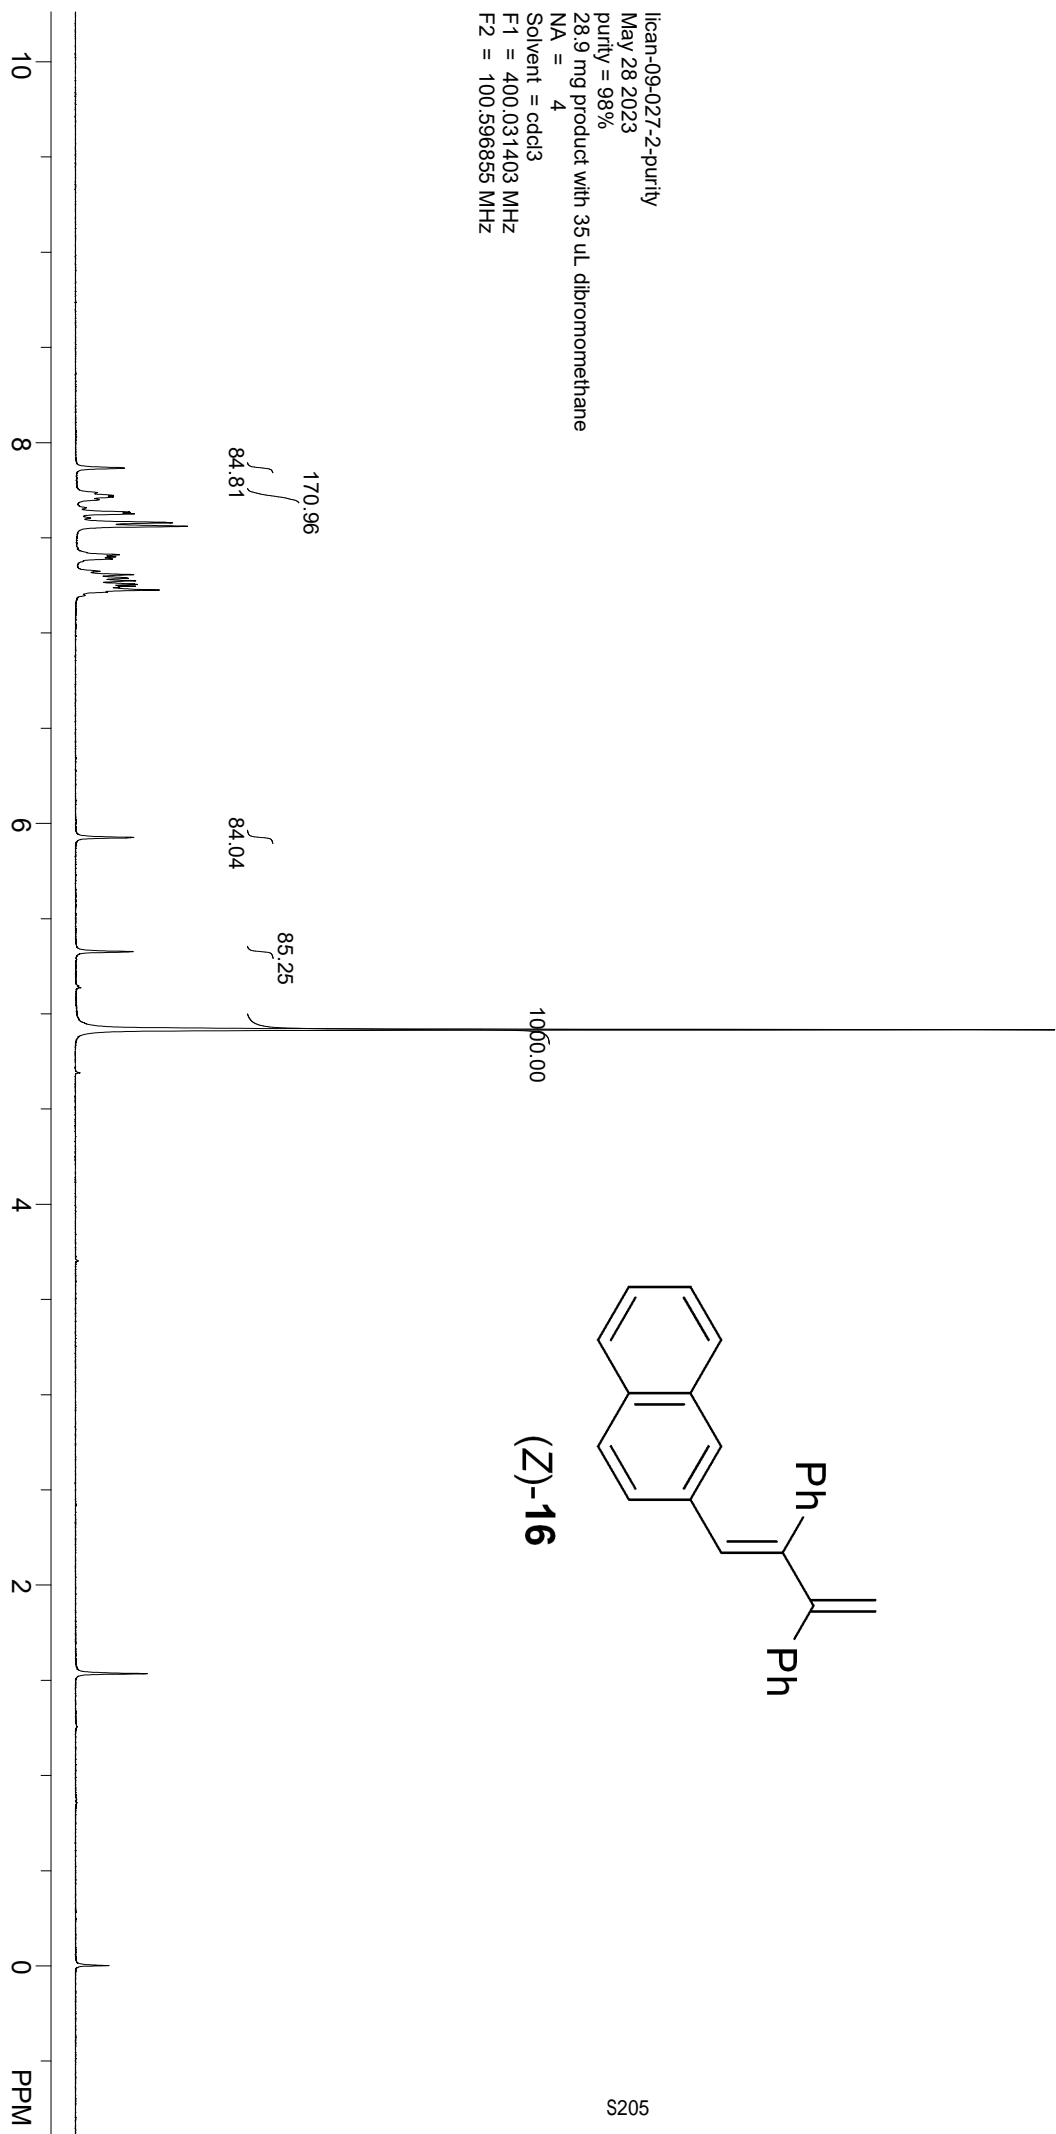

llican-09-027-2-C  
May 28 2023  
NA = 200  
Solvent = cdcl3  
F1 = 100.519737 MHz  
F2 = 399.717072 MHz

200  
150  
100  
50  
0 PPM

- 146.292
- 142.311
- 141.443
- 138.815
- 134.851
- 133.325
- 132.460
- 129.554
- 128.732
- 128.559
- 128.382
- 128.007
- 127.855
- 127.555
- 127.475
- 127.340
- 126.704
- 126.535
- 125.911
- 125.843
- 117.169

- 77.320
- 77.000
- 76.684

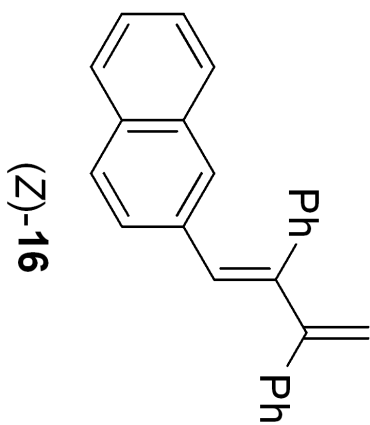

- 8.057
- 7.838
- 7.831
- 7.823
- 7.823
- 7.815
- 7.802
- 7.782
- 7.779
- 7.759
- 7.592
- 7.588
- 7.570
- 7.567
- 7.512
- 7.505
- 7.502
- 7.498
- 7.494
- 7.488
- 7.428
- 7.411
- 7.391
- 7.366
- 7.347
- 7.329
- 6.017
- 5.813

0.000

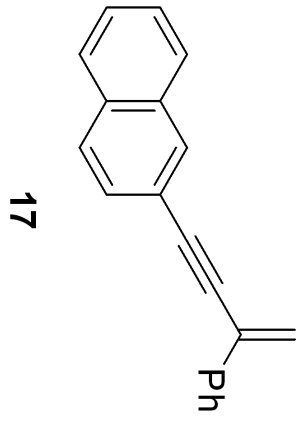

ican-08-011-H  
 Oct 24 2022  
 NA = 12  
 Solvent = CDCl3  
 F1 = 400.031799 MHz  
 F2 = 100.596855 MHz

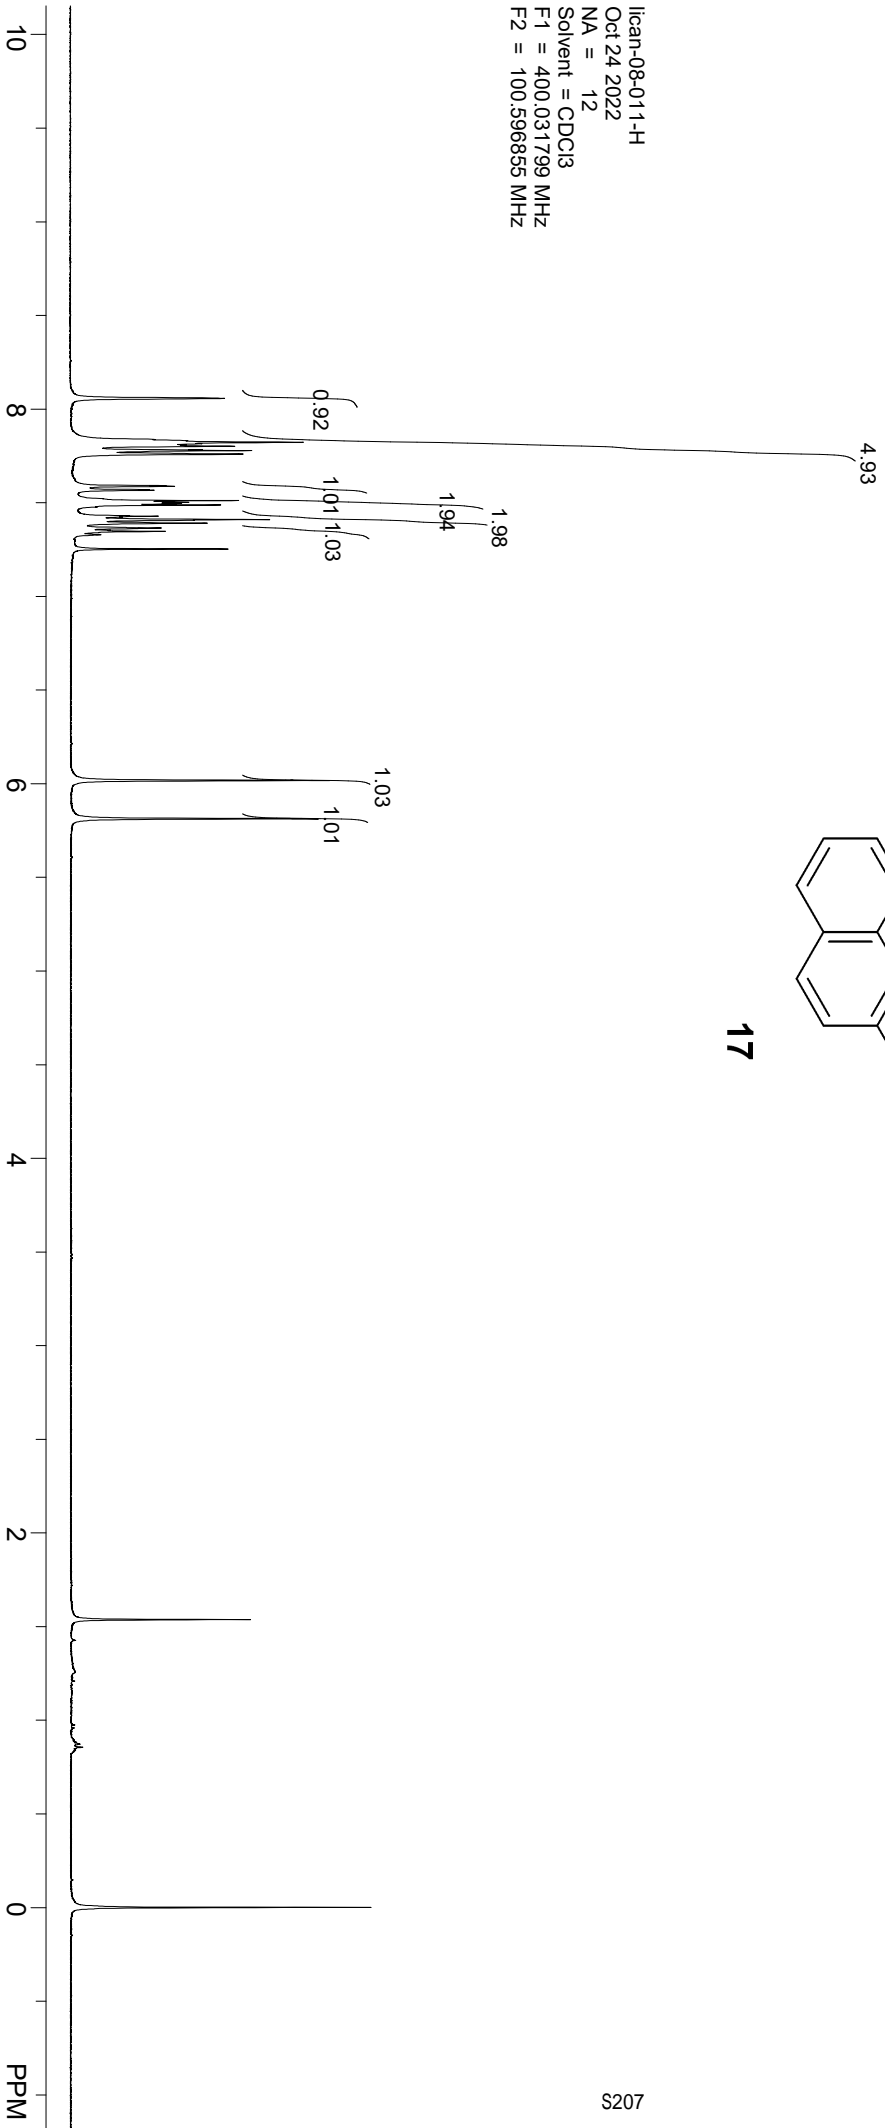

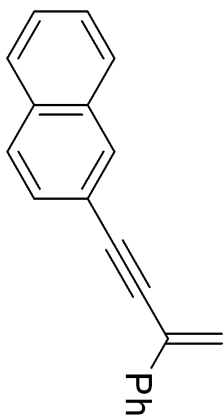

17

- 137.271
- 132.982
- 132.859
- 131.565
- 130.653
- 128.447
- 128.394
- 128.018
- 127.781
- 126.739
- 126.578
- 126.134
- 120.819
- 120.374
- 91.162
- 88.880
- 77.314
- 77.000
- 76.678

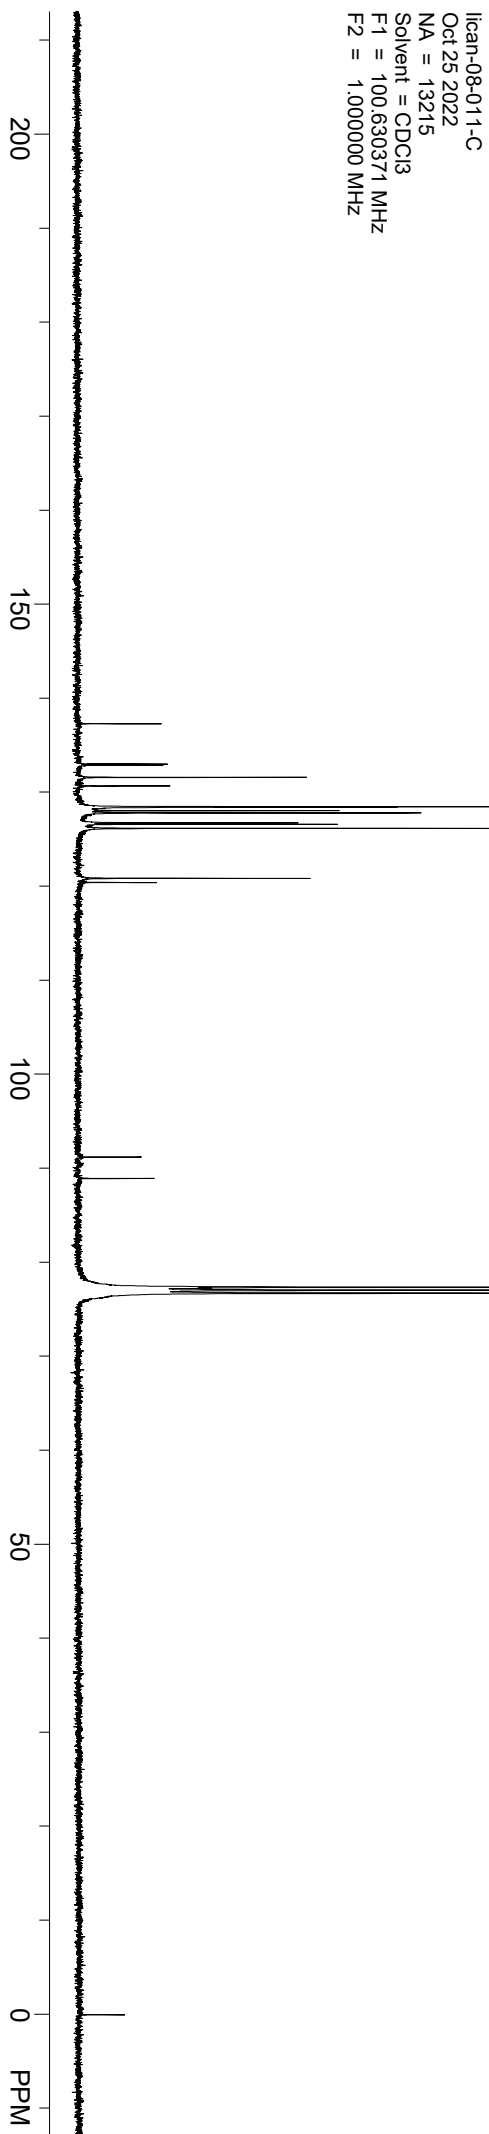

lican-08-011-C  
Oct 25 2022  
NA = 13215  
Solvent = CDCl3  
F1 = 100.630371 MHz  
F2 = 1.000000 MHz
